# Supplementary material for: Deep transcriptome annotation enables the discovery and functional characterization of cryptic small proteins
Source: eLife journal article supplement (doi:10.7554/elife.27860), 2017-10-30
Supplement: supp [file elife-27860-supp-v1.zip]

Archive with 42 entries (42 files):
- elife_poa_e27860_Figure_12_figure_supplement_4.pdf
- elife_poa_e27860_Figure_12_figure_supplement_3.pdf
- elife_poa_e27860_Figure_11_figure_supplement_3.pdf
- elife_poa_e27860_Figure_5_figure_supplement_3.pdf
- elife_poa_e27860_Figure_1_figure_supplement_1_source_data_1.xlsx
- elife_poa_e27860_Figure_13_source_data_1.xlsx
- elife_poa_e27860_Figure_12_source_data_1.xlsx
- elife_poa_e27860_Figure_12_figure_supplement_6.pdf
- elife_poa_e27860_Figure_5_figure_supplement_2.pdf
- elife_poa_e27860_Supplementary_File_2.xlsx
- elife_poa_e27860_Transparent_Reporting_File.pdf
- elife_poa_e27860_Figure_11_figure_supplement_1.pdf
- elife_poa_e27860_Supplementary_File_4.xlsx
- elife_poa_e27860_Figure_1_figure_supplement_2.pdf
- elife_poa_e27860_Figure_12_figure_supplement_2.pdf
- elife_poa_e27860_Figure_1_figure_supplement_1.pdf
- elife_poa_e27860_Figure_11_figure_supplement_2.pdf
- elife_poa_e27860_Figure_5_figure_supplement_1.pdf
- elife_poa_e27860_Figure_14_figure_supplement_2.pdf
- elife_poa_e27860_Figure_6_figure_supplement_1.pdf
- elife_poa_e27860_Figure_4_source_data_1.xlsx
- elife_poa_e27860_Figure_1_source_data_1.xlsx
- elife_poa_e27860_Figure_8_figure_supplement_1.pdf
- elife_poa_e27860_Source_Code_File_1.pl
- elife_poa_e27860_Supplementary_File_5.xlsx
- elife_poa_e27860_Supplementary_File_7.xlsx
- elife_poa_e27860_Figure_14_figure_supplement_1.pdf
- elife_poa_e27860_Supplementary_File_1.xlsx
- elife_poa_e27860_Figure_11_source_data_1.xlsx
- elife_poa_e27860_Figure_7_source_data_1.xlsx
- elife_poa_e27860_Supplementary_File_3.xlsx
- elife_poa_e27860_Figure_10_source_data_1.xlsx
- elife_poa_e27860_Figure_8_figure_supplement_1_source_data_1.xlsx
- elife_poa_e27860_Figure_3_source_Data_1.xlsx
- elife_poa_e27860_Figure_12_figure_supplement_1.pdf
- elife_poa_e27860_Supplementary_File_6.xlsx
- elife_poa_e27860_Figure_2_source_data_1.xlsx
- elife_poa_e27860_Figure_5_figure_supplement_4.pdf
- elife_poa_e27860_Figure_5_source_data_1.xlsx
- elife_poa_e27860_Figure_9_source_data_1.xlsx
- elife_poa_e27860_Figure_12_figure_supplement_5.pdf
- elife_poa_e27860_Figure_1_figure_supplement_2_source_data_1.xlsx
