# Supplementary material for: Deep transcriptome annotation enables the discovery and functional characterization of cryptic small proteins
Source: eLife journal article supplement (doi:10.7554/elife.27860), 2017-10-30
Supplement: supp [file elife-27860-supp-v1.zip › elife_poa_e27860_Figure_1_figure_supplement_1_source_data_1.xlsx]

## Sheet: Feuil1
	FIGURE1-figure supplement 1 panel a
	AltORFs
	Non repeat sequences	165188
	Repeat sequences	18003
	Non-LTR retrotransposons	12281
	LTR repeat	4041
	DNA repeat	2094
	Satellite	116
	Other repeats	17
	FIGURE1-figure supplement 1 panel b
	CDS
	Non repeat sequences	66587
	Repeat sequences	1677
	Non-LTR retrotransposons	1199
	LTR repeat	332
	DNA repeat	197
	Satellite	13
	Other repeats	2
