# Supplementary material for: Deep transcriptome annotation enables the discovery and functional characterization of cryptic small proteins
Source: eLife journal article supplement (doi:10.7554/elife.27860), 2017-10-30
Supplement: supp [file elife-27860-supp-v1.zip › elife_poa_e27860_Figure_1_figure_supplement_2_source_data_1.xlsx]

## Sheet: Feuil1
	hg38			100 shuffle average
	with kozak	Total count	% with kozak	with kozak	Total count	% with kozak	stdev	p
All altORF	76780	550460	0.139483	58722.2	488207	0.120281	0.000495595	0
