# Supplementary material for: Deep transcriptome annotation enables the discovery and functional characterization of cryptic small proteins
Source: eLife journal article supplement (doi:10.7554/elife.27860), 2017-10-30
Supplement: supp [file elife-27860-supp-v1.zip › elife_poa_e27860_Figure_1_source_data_1.xlsx]

## Sheet: Feuil1
	FIGURE 1d
	5'	CDS	3'	nc
	0.10035	0.359811	0.400896	0.138943
	FIGURE 1e
		hg38	Shuffled
		539134	476828
	stdev		513.674
	FIGURE 1f
		hg38	100 shuffled	stddev
	Total	21.8106	19.346	0.0203191
	utr5	17.7554	34.0391	0.126452
	orf	18.4423	15.0569	0.025751
	utr3	26.4424	22.0462	0.0410689
	ncRNA	30.0248	24.4981	0.111924
	FIGURE 1g
		Alternative	Reference
	kosak	15.0329	38.1045
