# Supplementary material for: Deep transcriptome annotation enables the discovery and functional characterization of cryptic small proteins
Source: eLife journal article supplement (doi:10.7554/elife.27860), 2017-10-30
Supplement: supp [file elife-27860-supp-v1.zip › elife_poa_e27860_Figure_2_source_data_1.xlsx]

## Sheet: Feuil1
	FIGURE 2a
		Alternative				Reference
		Nb orthologs	Nb paralogs			Nb orthologs	Nb paralogs
	P.troglodytes	113687	3706		P.troglodytes	25755	1112
	M.musculus	25930	1410		M.musculus	22304	1303
	B.taurus	26899	1262		B.taurus	16523	1570
	X.tropicalis	2372	711		X.tropicalis	12459	2415
	D.rerio	1925	562		D.rerio	12628	2511
	D.melanogaster	115	103		D.melanogaster	4881	3505
	C.elegans	35	77		C.elegans	3235	3367
	S.cerevisiae	6	20		S.cerevisiae	1854	1380
	FIGURE 2c, left panel (number of genes)				FIGURE 2c, right panel (% of genes)
		AltGenes	RefGenes			Alternative Genes	Reference Genes
	P.troglodytes	19861	18175		P.troglodytes	83.51	91.84
	M.musculus	11268	18014		M.musculus	47.38	91.03
	B.taurus	11446	16887		B.taurus	48.13	85.33
	X.tropicalis	2316	14024		X.tropicalis	9.73	70.86
	D.rerio	1942	13965		D.rerio	8.16	70.56
	D.melanogaster	191	8107		D.melanogaster	0.8	40.96
	C.elegans	105	7099		C.elegans	0.44	35.87
	S.cerevisiae	26	3190		S.cerevisiae	0.11	16.12
