# Supplementary material for: Deep transcriptome annotation enables the discovery and functional characterization of cryptic small proteins
Source: eLife journal article supplement (doi:10.7554/elife.27860), 2017-10-30
Supplement: supp [file elife-27860-supp-v1.zip › elife_poa_e27860_Figure_4_source_data_1.xlsx]

## Sheet: phyloP_1window_5rep_sorted_dist
prot_id	ref accession	ref gene	avg phylop alt	avg phylop ref	avg phylop window1	avg phylop window2	avg phylop window3	avg phylop window4	avg phylop window5	dist to middle (codon)
IP_282301.1	NM_000678.3	ADRA1D	0.99	0.84	0.63	1.11	1.12	0.92	0.82	80.5
IP_181889.1	NM_020752.2	GPR158	1.44	0.95	0.96	0.69	0.55	1.57	0.5	79
IP_158973.1	NM_001003801.1	SMARCD3	1.42	1.37	1.13	1.22	1.12	0.96	0.98	156.5
IP_120870.1	NM_001136258.1	SGMS2	0.88	0.82	0.77	0.89	0.94	0.81	0.64	47.08
IP_119369.1	XM_006714316.1	FRAS1	0.24	0.52	0.58	0.61	0.21	0.34	0.4	1.117
IP_233386.1	NM_001174117.1	DMXL2	0.63	0.99	1.11	0.97	0.92	0.83	1.11	880
IP_184868.1	NM_173540.2	FUT11	1.09	0.64	0.54	0.27	0.31	0.5	0.59	174
IP_298586.1	XM_006724469.1	DMD	NA	NA	NA	NA	NA	NA	NA	NA
IP_298586.1	XM_006724469.1	DMD	NA	NA	NA	NA	NA	NA	NA	NA
IP_298586.1	XM_006724469.1	DMD	NA	NA	NA	NA	NA	NA	NA	NA
IP_059395.1	NM_015001.2	SPEN	0.01	0.23	-0.18	-0.08	0.04	-0.07	-0.17	1.113
IP_104927.1	NM_013286.4	RBM15B	0.69	0.44	0.44	0.94	0.24	0.77	1.17	NA
IP_234782.1	NM_032445.2	MEGF11	1.26	1.01	0.64	0.98	0.92	0.8	1.14	147
IP_234782.1	NM_032445.2	MEGF11	1.26	1.01	0.64	0.98	0.92	0.8	1.14	147
IP_225398.1	NM_130850.2	BMP4	1.67	1.81	1.62	1.23	1.51	1.66	1.25	120.5
IP_273090.1	NM_006627.2	POP4	0.66	0.48	0.46	0.27	0.41	0.26	0.46	64
IP_156517.1	NM_012281.2	KCND2	0.88	0.71	0.46	0.81	0.95	0.51	0.92	192.5
IP_283307.1	XM_006723658.1	ACSS1	-0.14	0.78	1.16	1.2	-0.25	-0.03	0.35	61
IP_074812.1	NM_002293.3	LAMC1	0.36	0.57	0.63	0.23	0.76	0.38	0.72	304.5
IP_202574.1	NM_007180.2	TREH	0.86	0.37	0.38	0.37	0.45	0.08	0.44	204.5
IP_154004.1	NM_021723.3	ADAM22	2.4	1.14	1.14	1.03	1.24	1.17	1.3	382.5
IP_273311.1	NM_002333.3	LRP3	0.27	0.21	-0.01	0.12	-0.08	0.17	0.58	152.5
IP_157407.1	NM_032826.4	SLC35B4	1.51	1.01	1.04	1.09	1.3	0.94	1.06	126.5
IP_219020.1	NM_206827.1	RASL11A	-0.04	0.08	0.19	0.03	0.04	0.01	-0.06	28.81
IP_298425.1	NM_001163264.1	PCYT1B	NA	NA	NA	NA	NA	NA	NA	NA
IP_161629.1	NM_019851.2	FGF20	0.88	1.03	1.13	0.86	0.96	1.16	0.79	59
IP_091961.1	XM_006712526.1	LRP2	0.63	0.99	0.8	0.86	1.12	1.12	1.14	1,228.5
IP_119715.1	XM_005263314.1	AGPAT9	0.33	0.87	0.56	0.54	0.91	0.55	1.34	20.73
IP_197189.1	XM_005273861.1	FLRT1	0.33	0.29	0.38	0.11	0.06	-0.09	0.24	82.5
IP_100156.1	NM_001168272.1	ITPR1	0.2	0.74	0.53	0.53	0.83	0.43	0.63	NA
IP_144539.1	XM_005266818.1	SLC16A10	1.09	1.49	1.52	1.82	1.51	1.14	0.96	58.5
IP_203113.1	NM_001098169.1	BSX	0.62	0.74	0.95	0.86	0.77	0.77	0.57	26.92
IP_063463.1	NM_001198850.1	FOXJ3	2.18	2.08	1.82	1.87	2.5	1.92	2.41	240.5
IP_133908.1	NM_003062.3	SLIT3	0.5	0.94	1.17	1.31	0.26	0.69	1.04	371.5
IP_237486.1	NM_001039675.1	UNC45A	0.22	0.39	-0.48	0.05	0.87	0.14	0.12	289
IP_242287.1	NM_001164579.1	C16orf52	2.27	2.75	2.46	1.71	2.24	1.37	1.88	31.95
IP_203056.1	NM_003105.5	SORL1	0.38	0.64	0.74	0.4	0.68	0.9	0.59	115.5
IP_156823.1	NM_014390.2	SND1	1.31	1.15	1.16	1.13	1.29	1.26	1.11	112
IP_182275.1	NM_001270698.1	ARHGAP12	1.21	0.99	0.79	0.86	1.2	1.08	0.62	49.5
IP_182275.1	NM_001270698.1	ARHGAP12	1.21	0.99	0.79	0.86	1.2	1.08	0.62	49.5
IP_083070.1	NM_015909.3	NBAS	0.83	0.48	0.37	0.85	0.43	0.88	0.71	440
IP_175108.1	NM_032303.4	HSDL2	1.62	1.03	1.12	1.16	1.12	1.22	1.01	19.25
IP_176257.1	NM_001278546.1	NR6A1	1.79	1.85	1.81	1.63	1.87	2.12	1.82	74
IP_060396.1	XM_006710442.1	EPHB2	0.1	1.18	1.2	1.28	1	1.15	1.69	223.5
IP_174575.1	NM_080546.4	SLC44A1	2.09	1.71	1.78	1.52	1.75	1.57	1.34	261.5
IP_156669.1	NM_022444.3	SLC13A1	1.3	0.78	1.12	0.52	0.93	0.82	0.73	156
IP_058112.1	NM_001199862.1	KCNAB2	1.17	1.57	1.26	1.93	1.97	1.99	1.42	37
IP_058112.1	NM_001199862.1	KCNAB2	1.17	1.57	1.26	1.93	1.97	1.99	1.42	37
IP_295480.1	NM_015380.4	SAMM50	0.33	0.24	0.01	-0.15	0.14	-0.08	0.36	18.86
IP_142673.1	NM_001851.4	COL9A1	0.52	0.46	0.47	0.27	0.5	0.27	0.73	98.5
IP_154747.1	NM_001199847.1	SMURF1	0.46	1.12	1.1	1.05	0.78	1.56	1.29	148.5
IP_121369.1	NM_019050.2	USP53	0.88	0.54	0.27	0.31	0.8	0.98	0.62	342
IP_121369.1	NM_019050.2	USP53	0.88	0.54	0.27	0.31	0.8	0.98	0.62	342
IP_091944.1	XM_006712526.1	LRP2	0.86	0.98	0.88	1.05	1.22	1.34	0.87	1,271.5
IP_289037.1	NM_016631.3	PAXBP1	1.04	1.59	1.76	1.77	1.82	1.78	1.73	138.5
IP_184846.1	NM_004922.3	SEC24C	1.35	1.23	0.92	1.34	1.45	1.13	1.14	119.5
IP_090769.1	NM_018557.2	LRP1B	1.21	1.1	1.22	0.92	1.2	1.37	1.05	1.404
IP_177438.1	NM_014286.3	NCS1	1.63	1.11	1.39	0.94	1.44	1.43	1	30
IP_220974.1	NM_015057.4	MYCBP2	1.62	1.52	1.39	1.73	1.42	1.7	1.45	2.158
IP_106150.1	XM_005265329.1	ADAMTS9	0.87	0.75	0.57	0.91	0.86	0.54	0.91	43.29
IP_150735.1	NM_001127371.2	CDCA7L	0.15	0.08	0.3	0.01	0.02	0.3	0.11	147.5
IP_121504.1	XM_005263282.1	KIAA1109	0.95	1.17	0.85	0.79	1.02	0.78	1.22	206
IP_063963.1	XM_005270992.1	RNF220	1.67	1.96	1.83	2.26	2.33	1.98	1.8	108.5
IP_144473.1	NM_015891.2	CDC40	1.46	1.5	1.38	1.28	1.62	1.44	1.21	30.92
IP_185250.1	XM_005269988.1	ZMIZ1	1.39	1.48	1.53	1.36	1.53	1.53	0.98	65.5
IP_164235.1	NM_052898.1	XKR4	1.64	1.39	1.64	0.69	1.35	1.16	1.4	151
IP_267635.1	XM_006722600.1	MED16	0.05	0.64	0.64	0.17	0.87	0.72	0.7	320
IP_063968.1	XM_005270994.1	RNF220	1.55	1.81	1.87	1.43	1.89	1.41	1.57	97.5
IP_290298.1	XM_006724001.1	ITGB2	0.02	-0.08	-0.39	-0.6	-0.19	0.1	0.02	193
IP_125708.1	NM_003966.2	SEMA5A	0.55	0.58	0.84	0.76	0.53	0.51	0.46	84.5
IP_273606.1	NM_003367.2	USF2	1.24	0.63	0.46	0.83	0.63	0.51	0.33	84.5
IP_084401.1	XM_005264449.2	BIRC6	1.42	1.41	0.88	1.47	1.5	1.31	1.06	338.5
IP_297009.1	NM_013239.4	PPP2R3B	NA	NA	NA	NA	NA	NA	NA	106
IP_297009.1	NM_013239.4	PPP2R3B	NA	NA	NA	NA	NA	NA	NA	106
IP_105235.1	NM_020163.1	SEMA3G	0.24	-0.04	-0.2	-0.08	-0.14	-0.06	0.23	NA
IP_181315.1	NM_001001484.2	PTER	0.9	0.69	0.89	0.42	0.68	0.86	0.81	66
IP_208885.1	XM_006719272.1	ARID2	2.49	1.89	2.13	1.95	2.04	1.7	1.82	736.5
IP_118358.1	NM_015236.4	LPHN3	1.9	1.09	1.13	0.57	0.89	0.93	0.5	410.5
IP_211592.1	NM_002332.2	LRP1	0.11	0.45	0.46	0.5	0.58	0.42	0.32	1,376.5
IP_106549.1	NM_002941.3	ROBO1	1.14	1.02	1	0.59	1.07	1.14	0.86	312
IP_119076.1	XM_006714395.1	USO1	1.06	1.04	1.26	1.26	1.23	1.29	1.4	48.65
IP_121352.1	NM_016599.4	MYOZ2	0.96	0.89	0.66	0.77	1.09	0.63	0.88	81.5
IP_133778.1	NM_000806.5	GABRA1	1.17	1.34	1.68	1.78	0.99	1.04	1.67	53
IP_146118.1	XM_005267010.2	AIG1	1.55	1.49	1.75	1.57	1.72	1.57	1.38	75
IP_152522.1	NM_001220766.1	IKZF1	0.9	1.3	1.75	1.55	1.4	1.17	1.3	152.5
IP_152522.1	NM_001220766.1	IKZF1	0.9	1.3	1.75	1.55	1.4	1.17	1.3	152.5
IP_153753.1	XM_005250574.1	CACNA2D1	1.32	1.12	0.95	1.25	0.89	1.11	1.04	156.5
IP_165696.1	NM_018444.3	PDP1	0.49	0.93	0.94	0.97	0.64	0.63	0.7	22.42
IP_224415.1	XM_005267503.2	HECTD1	1.8	1.81	2.02	1.63	2.04	2.06	1.63	603
IP_260195.1	XM_006721897.1	LLGL2	0.26	0.41	0.68	0.36	0.36	0.35	0.48	117.5
IP_286206.1	NM_001033521.1	CSTF1	0.51	0.91	1.06	0.89	1.06	0.96	0.76	27.7
IP_167151.1	NM_018482.3	ASAP1	1.2	1.33	1.41	1.58	1.67	1.51	1.47	198
IP_167151.1	NM_018482.3	ASAP1	1.2	1.33	1.41	1.58	1.67	1.51	1.47	198
IP_177249.1	NM_000755.3	CRAT	0.46	0.77	0.59	0.83	0.76	0.71	1	163
IP_123983.1	NM_005245.3	FAT1	0.17	0.14	0.27	0.05	0.32	0.22	-0.03	1,127.5
IP_166212.1	NM_001282873.1	UBR5	1.39	1.47	1.65	1.18	1.29	1.67	1.42	448
IP_186213.1	XM_005269694.2	MYOF	0.62	0.85	0.85	1.05	0.95	0.63	0.56	707.5
IP_282008.1	NM_001009984.2	C20orf194	1.57	1.02	1.04	1.23	1.15	1.12	1.24	421
IP_223603.1	XM_005267510.1	LRP10	-0.53	-0.04	-0.07	-0.39	-0.31	-0.22	0.26	45.79
IP_074813.1	NM_002293.3	LAMC1	0.77	0.54	0.45	0.71	0.67	0.8	0.46	182
IP_301011.1	NM_001286074.1	TAF1	NA	NA	NA	NA	NA	NA	NA	NA
IP_198602.1	XM_006718615.1	PPP6R3	1.34	1.25	1.57	1.47	1.66	0.86	0.87	158.5
IP_198602.1	XM_006718615.1	PPP6R3	1.34	1.25	1.57	1.47	1.66	0.86	0.87	158.5
IP_212942.1	XM_005268678.2	CSRP2	0.59	1.15	1	1.25	1.15	1.13	1.21	20.25
IP_139716.1	NM_024165.2	PHF1	0.98	0.92	1.12	0.76	0.76	1.11	1.19	111.5
IP_235059.1	XM_005254298.1	GLCE	1.03	1.03	1.25	1.03	1.54	1.46	0.82	158.5
IP_183972.1	NM_001278186.1	HERC4	1.32	1.57	2.01	1.45	1.35	1.57	1.34	265
IP_182108.1	NM_016628.4	WAC	3.24	2.35	2.48	2.2	2.52	2.28	2.27	227.5
IP_258466.1	NM_030938.3	VMP1	1.12	1.95	1.81	1.98	1.51	1.84	1.89	25.66
IP_117089.1	NM_001173523.1	PCDH7	1.24	0.85	0.6	1.62	2.19	2.93	0.3	357.5
IP_092076.1	NM_000817.2	GAD1	1.62	1.55	1.33	2.08	1.55	1.41	1.48	219.5
IP_228140.1	XM_006720070.1	EML5	1.18	1.35	1.11	1.69	1.32	1.33	1.87	532.5
IP_097245.1	NM_022817.2	PER2	0.36	-0.05	0.02	-0.16	-0.15	-0.06	0.12	NA
IP_184158.1	XM_005269736.1	HK1	0.56	0.61	0.18	0.57	0.81	0.43	0.76	327
IP_191389.1	NM_005343.2	HRAS	0.15	0.8	0.86	1.06	1.06	1.02	0.63	44
IP_296247.1	NM_033517.1	SHANK3	-0.03	0.54	0.52	0.34	0.85	0.5	0.49	548.5
IP_112177.1	XM_005247172.1	DVL3	0.56	1.35	0.76	1.21	1.54	1.5	1.33	250.5
IP_178840.1	NM_013366.3	ANAPC2	1.02	0.68	0.33	0.61	0.45	0.3	0.32	97
IP_243166.1	NM_017458.3	MVP	0.64	0.45	0.47	0.72	0.29	0.38	0.32	193
IP_083685.1	NM_001287489.1	OTOF	0.61	0.69	0.32	0.66	1.03	0.48	0.51	464.5
IP_095354.1	NM_001206878.1	CTDSP1	0.13	0.53	0.3	0.86	0.45	0.75	0.56	NA
IP_117087.1	NM_032456.2	PCDH7	1.15	0.4	0.42	0.25	0.65	0.32	0.42	447
IP_142346.1	NM_021073.2	BMP5	2.48	1.42	1.22	1.54	1.47	1.6	1.4	171.5
IP_197673.1	NM_006268.4	DPF2	0.42	0.94	0.84	0.81	0.57	1.05	1.23	48.26
IP_197673.1	NM_006268.4	DPF2	0.42	0.94	0.84	0.81	0.57	1.05	1.23	48.26
IP_163597.1	NM_003816.2	ADAM9	0.94	0.86	0.58	1.15	1.3	0.84	0.67	255.5
IP_215414.1	NM_001146699.1	RBM19	0.55	0.29	0.16	0.19	0.18	0.31	0.74	47
IP_263542.1	NM_005559.3	LAMA1	0.01	0.16	0.32	-0.03	-0.02	0.28	-0.05	791.5
IP_282952.1	NM_032985.4	SEC23B	0.6	0.77	1.34	0.84	0.94	0.38	1.04	305
IP_197675.1	XM_005274149.1	DPF2	0.8	0.94	0.73	0.83	0.64	1.09	1.22	50.9
IP_197675.1	XM_005274149.1	DPF2	0.8	0.94	0.73	0.83	0.64	1.09	1.22	50.9
IP_211594.1	NM_002332.2	LRP1	-0.15	0.45	0.41	0.44	0.28	0.52	0.19	521.5
IP_182246.1	NM_001174096.1	ZEB1	0.58	1.29	0.93	1.22	1.16	1.5	1.27	416
IP_156125.1	NM_002291.2	LAMB1	0.38	0.18	0.1	0.32	0.1	0.14	-0.03	244
IP_188121.1	NM_005445.3	SMC3	2.12	1.84	1.48	2.05	1.36	2.08	2.15	125.5
IP_090749.1	NM_018557.2	LRP1B	0.3	1.12	1.59	0.83	0.94	0.53	0.75	520.5
IP_144760.1	NM_001080976.1	DSE	0.74	0.88	0.41	0.91	0.6	0.58	1.22	191.5
IP_274861.1	NM_001111020.2	SUPT5H	0.46	1.15	1.19	1.08	1.24	0.84	1.17	314
IP_059405.1	NM_015001.2	SPEN	1.76	0.1	0.09	0.02	0.16	0.06	-0.01	1.593
IP_276684.1	NM_006247.3	PPP5C	1.64	1.47	1.33	1.38	1.67	1.01	1.14	158
IP_064260.1	NM_001243766.1	POMGNT1	1.54	1.48	1.33	1.17	1.05	1.59	1.25	207
IP_093645.1	NM_012433.2	SF3B1	0.91	1.67	1.79	1.81	1.67	1.93	1.49	359.5
IP_219276.1	NM_194318.3	B3GALTL	0.56	0.76	0.54	0.74	0.72	0.51	0.58	150
IP_079722.1	NM_004501.3	HNRNPU	1.6	1.45	1.75	0.81	1.9	1.49	1.55	127
IP_178552.1	NM_017617.3	NOTCH1	0.49	0.75	1.05	1.24	0.83	0.71	0.82	1,054.5
IP_145993.1	NM_001286612.1	REPS1	2.29	1.72	1.79	1.57	1.56	1.71	1.68	312.5
IP_237223.1	XM_006720497.1	KIF7	0.24	0.55	0.63	0.61	0.57	0.63	0.33	534.5
IP_091940.1	XM_006712526.1	LRP2	0.81	0.99	0.93	1.17	1.01	0.95	1.13	2.127
IP_093534.1	XM_006712647.1	HECW2	0.85	0.62	0.77	0.75	0.63	0.99	0.45	725.5
IP_116811.1	NM_147181.3	KCNIP4	1.26	1.38	1.47	1.55	1.31	1.5	1.4	43
IP_160971.1	XM_005266038.1	DLGAP2	6.46	5.03	4.92	5.78	4.51	4.95	4.43	46.5
IP_252265.1	NM_016239.3	MYO15A	0.92	0.24	0.02	0.69	0.86	-0.16	0.03	47.34
IP_209088.1	NM_033150.2	COL2A1	-0.48	0.09	-0.28	-0.05	0.28	0.36	0.34	68.03
IP_209088.1	NM_033150.2	COL2A1	-0.48	0.09	-0.28	-0.05	0.28	0.36	0.34	68.03
IP_270487.1	NM_001289103.1	PRKCSH	0.15	-0.13	-0.3	0.11	-0.16	-0.28	-0.33	183
IP_088394.1	NM_001037872.1	REV1	1.29	1.06	1.51	1.6	1.08	0.56	0.97	91
IP_150904.1	NM_015550.3	OSBPL3	0.17	0.93	0.58	0.93	0.9	1.19	1.5	317.5
IP_176088.1	NM_001100588.1	RC3H2	1.43	1.74	1.96	1.66	1.77	1.79	1.97	180.5
IP_065077.1	NM_201546.3	CDCP2	0.89	0.61	0.45	0.27	0.94	0.62	0.72	35.52
IP_108589.1	NM_198402.3	PTPLB	1.36	1.39	1.12	1.29	1.44	1.21	1.65	48.5
IP_066983.1	NM_024813.2	RPAP2	1.23	0.72	0.77	0.82	0.8	0.67	0.73	178
IP_108720.1	XM_005247436.1	ITGB5	0.89	0.63	0.58	0.56	0.62	0.69	0.7	137.5
IP_277431.1	XM_005258426.1	RUVBL2	0.91	0.56	0.68	0.35	0.26	0.55	0.76	31.31
IP_181507.1	NM_201590.2	CACNB2	1.92	1.52	1.31	1.01	1.22	1.68	1.24	236
IP_181507.1	NM_201590.2	CACNB2	1.92	1.52	1.31	1.01	1.22	1.68	1.24	236
IP_181507.1	NM_201590.2	CACNB2	1.92	1.52	1.31	1.01	1.22	1.68	1.24	236
IP_304706.1	NM_001170760.1	SRPK3	NA	NA	NA	NA	NA	NA	NA	NA
IP_178079.1	NM_000787.3	DBH	0.4	0.31	0.33	0.26	0.47	0.48	0.31	196
IP_261627.1	NM_178493.5	NOTUM	0.88	0.96	0.82	0.9	0.72	0.79	1	44.62
IP_059346.1	XM_005245790.1	PLEKHM2	1.26	1.12	1.29	1.04	1.1	1.09	1.43	418
IP_091941.1	XM_006712526.1	LRP2	0.86	0.98	1.18	0.98	0.98	1	0.96	531.5
IP_105249.1	NM_007184.3	NISCH	0.88	0.46	0.42	0.78	0.73	0.65	0.51	NA
IP_109149.1	NM_001204890.1	ISY1-RAB43	0.86	1.75	1.96	2.6	1.82	2.11	3.15	40.5
IP_122104.1	NM_032557.5	USP38	2.07	1	1.38	0.62	0.87	0.96	0.76	41.5
IP_150432.1	NM_001112706.2	SCIN	0.61	0.64	0.45	0.12	0.84	0.52	0.5	279.5
IP_164988.1	NM_001164383.1	STAU2	1.61	1.69	2.58	0.9	2.56	1.12	2.82	26.46
IP_166566.1	NM_052900.2	CSMD3	0.81	0.95	0.95	0.54	0.86	0.96	1.2	506
IP_226073.1	NM_005956.3	MTHFD1	0.54	0.83	0.42	0.97	0.56	0.58	0.85	390.5
IP_234354.1	NM_003922.3	HERC1	1.2	1.09	0.87	0.87	1.09	1.03	1.44	318
IP_235145.1	XM_005254528.2	UACA	0.45	0.12	-0.14	0.29	0.03	0.14	0.37	580.5
IP_245056.1	NM_004614.4	TK2	0.67	0.62	0.71	0.86	0.66	0.88	0.29	29.36
IP_263395.1	NM_173207.2	TGIF1	1.15	0.79	0.35	0.8	0.95	0.77	0.93	73
IP_265943.1	XM_005266700.1	NARS	0.61	0.85	0.63	1.11	1.08	1	0.76	221
IP_166672.1	NM_000127.2	EXT1	2.86	2.45	2.62	2.69	1.68	2.86	2.23	54
IP_140170.1	NM_003137.4	SRPK1	1.38	1.2	0.99	1.14	1.53	1.04	1.37	142
IP_218733.1	NM_014363.5	SACS	0.1	0.65	0.73	0.39	0.65	0.75	0.71	2.121
IP_187144.1	NM_001308.2	CPN1	1.24	0.47	0.66	0.65	0.31	0.05	0.05	38.19
IP_234352.1	NM_003922.3	HERC1	0.92	1.09	1.03	1.08	0.77	0.83	0.83	2,074.5
IP_232177.1	NM_001128608.1	MAPKBP1	1.09	0.83	0.8	0.96	1.24	0.72	0.54	629
IP_302386.1	XM_005262062.2	MID2	NA	NA	NA	NA	NA	NA	NA	NA
IP_249519.1	NM_001163809.1	WDR81	0.35	0.37	0.17	0.25	0.32	0.5	0.24	491.5
IP_123209.1	NM_001166108.1	PALLD	0.79	0.6	0.03	0.71	1.42	1.01	0.34	94
IP_090750.1	NM_018557.2	LRP1B	1.47	1.1	1.24	1.19	1.15	1.23	1.1	1,802.5
IP_219306.1	NM_023037.2	FRY	0.71	0.82	0.75	1.49	1.13	0.23	1.98	200.5
IP_235072.1	NM_017705.3	PAQR5	0.7	0.73	0.58	0.53	0.8	0.7	0.78	49
IP_298441.1	XM_005274552.1	POLA1	NA	NA	NA	NA	NA	NA	NA	NA
IP_284002.1	NM_001257137.1	ITCH	1.26	1.36	1.26	1.09	1	1.02	1.12	45.92
IP_175231.1	NM_004697.4	PRPF4	1.44	0.89	0.63	1.06	0.99	0.65	0.66	110.5
IP_232559.1	NM_001286414.1	TUBGCP4	1.04	1.38	1.12	1.6	1.62	0.93	2.14	239.5
IP_091962.1	XM_006712526.1	LRP2	0.95	0.98	0.95	1.1	0.89	1.08	0.82	1,574.5
IP_212041.1	NM_001278472.1	MON2	1.06	1.46	1.39	1.25	1.56	1.31	1.61	165.5
IP_257868.1	XM_005257470.1	MBTD1	1.78	1.82	1.65	1.82	1.66	1.7	1.73	256
IP_121841.1	NM_032961.1	PCDH10	1.65	0.97	0.62	0.76	0.77	0.9	0.74	446
IP_127667.1	NM_001029875.2	RGS7BP	1.85	2.37	2.35	2.33	2.27	2.24	2.37	61.05
IP_131600.1	NM_144723.1	ZMAT2	1.41	2.38	2.4	2.17	2.48	1.81	2.25	47
IP_251158.1	XM_005256427.2	CHD3	-0.03	1.12	1.24	0.6	0.52	1.12	0.78	387
IP_108653.1	XM_006713817.1	KALRN	1.12	1.31	1.59	1.39	1.61	1.08	1.4	209.5
IP_189124.1	NM_007329.2	DMBT1	-2.61	-1.66	-1.08	-2.15	-1.64	-1.37	-1.35	658
IP_100294.1	NM_001033117.2	SRGAP3	0.76	1.24	1.25	1.21	1.42	1.66	1.81	NA
IP_100294.1	NM_001033117.2	SRGAP3	0.76	1.24	1.25	1.21	1.42	1.66	1.81	NA
IP_103608.1	NM_000316.2	PTH1R	0.72	0.72	0.63	0.23	1.23	0.3	0.63	NA
IP_145018.1	NM_000165.3	GJA1	0.5	0.91	1.02	0.76	0.84	0.84	0.98	113.5
IP_198236.1	XM_006718578.1	PC	0.13	0.71	0.53	1.07	1.08	0.39	0.35	431.5
IP_218730.1	NM_014363.5	SACS	1.03	0.64	0.84	0.87	0.63	0.66	0.49	2,142.5
IP_143897.1	XM_005266916.2	PNISR	2.85	1.76	1.85	1.74	2.06	1.67	1.61	295.5
IP_062320.1	XM_005271091.1	DLGAP3	1.21	1.49	1.42	1.42	1.43	1.75	1.93	85.5
IP_127307.1	NM_015360.4	SKIV2L2	1.46	1.39	1.38	1.61	1.73	1.12	1.39	194
IP_161288.1	XM_006716263.1	TNKS	1.61	0.8	0.9	0.94	0.86	0.99	0.56	351.5
IP_271237.1	NM_014921.4	LPHN1	-0.03	0.56	0.15	0.63	0.9	0.45	0.56	499
IP_164612.1	NM_033058.2	TRIM55	0.88	1.4	1.4	1.36	1.42	1.49	1.5	161.5
IP_187846.1	NM_004210.4	NEURL1	1.17	0.66	0.84	0.89	0.79	0.98	0.88	200.5
IP_283019.1	NM_001278625.1	CRNKL1	1.72	0.98	1.06	0.26	0.3	0.22	0.44	151
IP_144755.1	NM_001080976.1	DSE	0.59	0.89	0.85	0.91	0.84	0.68	0.7	37.69
IP_174278.1	NM_024642.4	GALNT12	1.13	0.55	0.7	0.12	0.84	0.4	0.19	77
IP_097492.1	NM_001244008.1	KIF1A	0.58	0.79	0.72	0.47	1.07	0.95	0.93	NA
IP_097492.1	NM_001244008.1	KIF1A	0.58	0.79	0.72	0.47	1.07	0.95	0.93	NA
IP_146957.1	NM_014892.4	SCAF8	1.7	1.15	1.45	1.5	1.39	0.87	0.72	561
IP_241963.1	NM_001256720.1	CLEC19A	0.57	0.44	0.37	0.68	0.11	0.76	0.58	42.5
IP_272555.1	NM_004386.2	NCAN	-0.16	-0.24	-0.18	-0.42	-0.54	-0.22	-0.54	400
IP_274856.1	NM_001111020.2	SUPT5H	0.87	1.04	1.42	1.17	1.61	1.21	1.82	84
IP_118180.1	NM_004898.3	CLOCK	2.7	1.3	1.45	0.99	1.25	1.22	1.13	358.5
IP_162602.1	NM_001197293.2	DPYSL2	0.8	1.13	1.58	1.33	1.53	0.88	1.23	204
IP_258908.1	XM_006721657.1	DDX42	1.12	1.1	0.72	0.42	1.13	1.48	1.57	105.5
IP_293156.1	NM_031937.2	TBC1D10A	1.59	1.06	0.89	1.46	1.35	0.6	1.03	138
IP_096041.1	NM_014689.2	DOCK10	1.44	1.02	1.35	0.94	0.96	1.14	1.05	NA
IP_264522.1	NM_014939.3	TRAPPC8	1.72	1.43	1.12	1.49	1.27	1.42	1.45	243.5
IP_125702.1	NM_003966.2	SEMA5A	0.16	0.61	0.78	0.82	0.46	0.85	0.31	379
IP_057838.1	NM_018216.1	PANK4	0.84	0.8	0.76	1.21	0.41	1.34	0.84	200.5
IP_092903.1	NM_178123.4	SESTD1	1.13	1.58	1.54	1.87	1.36	1.67	1.85	202
IP_092942.1	NM_182678.2	UBE2E3	1.62	3.1	3.03	3.11	3.18	3.04	2.8	65.5
IP_153505.1	NM_000941.2	POR	0.77	0.81	0.64	0.96	0.47	1.06	0.67	138
IP_157516.1	NM_013316.3	CNOT4	3.05	2.77	2.84	2.8	3.03	2.71	2.79	269
IP_178548.1	NM_017617.3	NOTCH1	0.65	0.74	0.7	0.48	0.77	1.01	1	178.5
IP_185695.1	NM_005271.3	GLUD1	0.72	1.36	0.92	1.42	1.21	1.08	1.11	224
IP_255621.1	XM_005257618.1	STAT3	0.95	1.28	1.18	1.23	1.22	1.39	1.62	247
IP_267866.1	XM_005259531.1	DAZAP1	1.79	1.5	1.78	1.75	2.07	1.61	0.94	96
IP_095246.1	XM_006712721.1	TNS1	0.49	0.47	0.1	0.01	0.29	0.68	0.08	NA
IP_104780.1	NM_001206957.1	RASSF1	0.46	0.67	0.68	0.65	0.66	0.65	0.68	NA
IP_104780.1	NM_001206957.1	RASSF1	0.46	0.67	0.68	0.65	0.66	0.65	0.68	NA
IP_244207.1	NM_002968.2	SALL1	1.79	1.57	2.08	1.52	1.99	1.14	1.1	200.5
IP_211599.1	NM_002332.2	LRP1	0.35	0.44	0.45	0.27	0.3	0.75	0.4	1,378.5
IP_104484.1	NM_001640.3	APEH	0.83	0.67	0.74	0.76	0.69	0.3	0.4	NA
IP_105112.1	NM_000688.5	ALAS1	0.26	0.73	0.75	0.73	0.41	0.81	0.64	NA
IP_128916.1	NM_001884.3	HAPLN1	0.28	0.59	0.46	0.53	1.1	0.4	0.28	57.5
IP_122819.1	NM_000857.2	GUCY1B3	0.79	1.06	0.99	1.01	1.04	0.63	1.14	208.5
IP_133601.1	NM_024007.3	EBF1	2	1.9	2.21	2.31	2.53	2.43	2.18	55.5
IP_079256.1	NM_000081.3	LYST	1.07	0.74	0.79	0.57	1.06	0.55	0.78	1,588.5
IP_253227.1	NM_203318.1	MYO18A	0.84	0.71	0.63	0.46	0.84	0.68	0.48	318.5
IP_269289.1	NM_001079817.1	INSR	0.42	0.39	0.67	0.38	0.59	0.35	0.7	456.5
IP_104069.1	NM_001407.2	CELSR3	0.86	0.58	0.05	0.39	0.14	0.59	0.62	NA
IP_157012.1	XM_006715910.1	FLNC	-0.44	-0.41	-0.38	0.05	-0.49	-0.01	0.01	501
IP_086469.1	NM_020459.1	PAIP2B	1.26	1.06	0.89	0.93	0.96	1.02	0.99	16.8
IP_212230.1	NM_007191.4	WIF1	1.02	1.17	1.93	1.29	1.29	1.3	1.45	62.5
IP_228526.1	NM_001002860.3	BTBD7	2.04	1.25	0.77	1.22	1.6	0.94	1.5	497.5
IP_157172.1	NM_014997.3	KLHDC10	1.55	1.65	1.37	1.28	1.93	1.49	1.86	86.5
IP_157172.1	NM_014997.3	KLHDC10	1.55	1.65	1.37	1.28	1.93	1.49	1.86	86.5
IP_130131.1	XM_005271895.1	CSNK1G3	1.19	1.52	0.79	1.42	1.44	1.12	1.41	94.5
IP_146459.1	NM_139126.3	PPIL4	1.13	1.16	1.18	0.97	1.08	0.96	1.13	176
IP_067172.1	NM_002858.3	ABCD3	1.38	1.6	1.81	1.15	1.55	1.57	1.88	35
IP_181981.1	NM_001253866.1	YME1L1	1.51	1.38	1.24	1.23	2.06	1.3	1.33	209.5
IP_108719.1	XM_005247436.1	ITGB5	0.61	0.72	0.45	0.3	0.56	0.41	0.96	118.5
IP_113232.1	NM_015562.1	UBXN7	1.26	1.48	1.26	1.52	1.81	1.34	1.64	157
IP_138449.1	NM_021904.2	GABBR1	1.26	1.15	1.08	1.28	1.68	1.41	0.99	52.5
IP_141066.1	XM_005248965.2	UBR2	1.57	1.39	1.36	1.32	1.69	1.46	1.49	297.5
IP_154430.1	NM_022900.4	CASD1	1.76	1.48	1.36	1.29	1.5	1.39	1.76	60.5
IP_156128.1	NM_002291.2	LAMB1	0.14	0.2	0.41	0.33	0.53	0.12	0.06	610
IP_184181.1	XM_006717738.1	TSPAN15	0.84	0.36	0.35	0.21	0.3	0.33	0.5	26.1
IP_214902.1	NM_170665.3	ATP2A2	1.71	1.24	1.11	0.93	0.24	0.41	0.91	399.5
IP_227267.1	XM_006720344.1	AREL1	1.48	1.57	1.48	2	1.59	1.4	1.38	336
IP_236067.1	NM_001168412.1	TSPAN3	1.52	1.32	1.29	1.29	1.29	1.29	1.29	24.44
IP_264065.1	NM_001142966.1	GREB1L	1.22	1.08	0.9	1.31	0.84	1.43	1.06	509.5
IP_292419.1	XM_005261419.2	CABIN1	1.05	0.88	0.46	0.29	0.59	1.03	1.21	192.5
IP_209676.1	NM_020039.3	ASIC1	1.5	1.13	0.82	1.16	1	1.14	1.11	38.6
IP_206190.1	NM_002046.4	GAPDH	1.4	1.35	1.26	1.52	1.3	1.33	1.34	84.5
IP_091938.1	XM_006712526.1	LRP2	0.65	0.99	0.91	0.86	1.09	0.94	1.11	685
IP_210527.1	NM_138473.2	SP1	0.38	0.66	0.52	0.57	0.52	0.72	0.67	232
IP_300068.1	NM_031407.6	HUWE1	NA	NA	NA	NA	NA	NA	NA	NA
IP_297989.1	NM_003159.2	CDKL5	NA	NA	NA	NA	NA	NA	NA	NA
IP_066996.1	NM_005665.4	EVI5	1.65	1.73	1.83	1.57	1.62	1.46	1.8	87.5
IP_066996.1	NM_005665.4	EVI5	1.65	1.73	1.83	1.57	1.62	1.46	1.8	87.5
IP_092748.1	NM_003319.4	TTN	1	0.9	0.52	0.99	0.46	1	0.71	4,288.5
IP_096690.1	NM_001282958.1	EIF4E2	2.19	2.47	2.19	2.47	2.21	2.7	2.5	NA
IP_186705.1	NM_003061.2	SLIT1	0.53	0.9	1.09	0.8	1.01	1	0.85	658.5
IP_250801.1	NM_001005408.1	NEURL4	0.75	0.9	0.86	1.19	0.75	0.63	1.17	55.51
IP_227611.1	NM_014909.4	VASH1	2.13	1.87	1.89	2.08	1.95	2.36	2.07	88
IP_067013.1	NM_005665.4	EVI5	1.65	1.73	1.5	1.55	1.63	1.76	1.82	266.5
IP_067013.1	NM_005665.4	EVI5	1.65	1.73	1.5	1.55	1.63	1.76	1.82	266.5
IP_164136.1	NM_001083617.1	RB1CC1	1.81	1.2	1.14	0.91	1.38	1.11	1.29	742
IP_231382.1	NM_001036.3	RYR3	1.3	0.95	0.93	0.84	1.09	1.34	1.2	2,371.5
IP_253231.1	NM_203318.1	MYO18A	0.22	0.73	0.82	0.84	0.53	0.97	0.78	29.43
IP_268263.1	NM_003249.3	THOP1	0.09	0.61	0.1	0.79	0.79	0.61	0.01	88.5
IP_203053.1	NM_003105.5	SORL1	0.36	0.62	0.87	0.51	1.02	0.26	0.24	455.5
IP_245679.1	NM_001145964.1	SLC12A4	0.96	0.65	0.35	0.52	0.67	0.44	0.85	468
IP_223488.1	NM_007192.3	SUPT16H	0.81	1.46	1.34	1.26	1.43	1.05	1.52	439.5
IP_215175.1	NM_001109662.3	HECTD4	1.18	0.88	0.34	1.41	1.13	0.87	1.16	621.5
IP_226177.1	XM_005268023.2	SPTB	1.21	0.24	-0.04	-0.1	0.29	0.34	0.05	1,048.5
IP_083985.1	NM_177983.2	PPM1G	1.8	1.52	1.76	1.78	1.25	1.61	1.53	206
IP_243951.1	NM_000293.2	PHKB	2.08	1.22	1.31	0.84	0.89	0.71	1.22	216
IP_299475.1	NM_001282166.1	SUV39H1	NA	NA	NA	NA	NA	NA	NA	NA
IP_253206.1	NM_001098635.1	SEZ6	0.35	0.25	0.16	0.41	0.4	0.27	0.39	60.03
IP_091512.1	NM_006593.2	TBR1	2.02	2.1	1.19	3.16	1.52	2.69	1.22	48
IP_122303.1	NM_178835.3	ZNF827	1.75	1.65	1.45	1.51	2.23	1.49	1.47	293.5
IP_132986.1	NM_018047.2	RBM22	1.7	1.1	0.84	0.84	1.15	1.02	1.36	163.5
IP_147291.1	NM_005891.2	ACAT2	1.24	0.36	0.57	0.46	0.54	0.71	0.05	88.5
IP_182290.1	NM_004521.2	KIF5B	1.33	1.29	1.3	1.3	1.32	1.3	1.34	403.5
IP_214306.1	XM_005268742.1	KIAA1033	1.83	1.65	1.85	1.62	1.6	1.75	1.16	456.5
IP_241746.1	NM_002474.2	MYH11	0.07	0.89	0.81	1.02	1.01	1.13	1.1	722.5
IP_220670.1	XM_005266358.1	PCDH17	0.94	1.15	0.6	1.43	0.85	1.18	1.16	501.5
IP_083304.1	NM_052920.1	KLHL29	0.28	1.68	1.67	1.42	1.66	1.04	1.35	271
IP_083520.1	NM_001256308.1	DTNB	0.46	1.12	1.54	1.05	1.65	1.3	0.96	128
IP_083520.1	NM_001256308.1	DTNB	0.46	1.12	1.54	1.05	1.65	1.3	0.96	128
IP_157730.1	NM_024926.3	TTC26	1.06	1.34	1.18	1.14	1.76	1.35	1.46	62
IP_220986.1	NM_015057.4	MYCBP2	1.46	1.52	1.61	1.65	1.35	1.64	1.22	976
IP_272181.1	XM_005259824.1	MAST3	0.45	-0.01	0.1	0.24	-0.22	-0.11	-0.64	546
IP_129704.1	NM_001127511.2	APC	2.31	0.98	0.99	0.96	0.82	0.83	1.47	1.025
IP_254237.1	XM_006721853.1	ACACA	1.69	1.15	1.05	1.44	0.81	0.85	1.8	594
IP_244325.1	NM_004530.4	MMP2	0.29	0.84	0.75	0.77	0.72	1.01	1.01	49.41
IP_093478.1	XM_005246437.1	TMEFF2	1.6	1.65	1.7	1.7	1.68	1.55	1.56	39.53
IP_126291.1	NM_030955.2	ADAMTS12	0.87	0.47	0.36	0.41	0.6	0.46	0.33	219.5
IP_106176.1	XM_005265568.1	MAGI1	1.32	1.38	1.25	0.9	1.51	1.8	1.74	390
IP_277402.1	NM_006184.5	NUCB1	1.13	0.43	0.34	0.72	0.82	0.78	0.77	36
IP_152961.1	NM_001287062.1	RABGEF1	1.37	1.07	1.54	1.15	1.14	0.91	0.88	191
IP_137441.1	NM_004973.3	JARID2	1.6	2.4	2.57	2.37	2.44	2.13	2.35	507.5
IP_218732.1	NM_014363.5	SACS	0.63	0.64	0.78	0.43	0.63	0.74	0.66	298
IP_227773.1	NM_004863.3	SPTLC2	0.66	1.07	1.47	2.16	1.32	1.18	1.05	212.5
IP_192982.1	XM_005252832.1	DENND5A	2.08	1.57	1.34	1.4	1.78	1.65	1.07	94
IP_126861.1	NM_006251.5	PRKAA1	1.51	1.24	1.4	0.91	1.32	1.04	1.36	151.5
IP_234332.1	NM_003922.3	HERC1	0.71	1.09	0.99	1.54	1.11	0.87	1.27	1.413
IP_286957.1	NM_017798.3	YTHDF1	0.89	1.22	1.11	1.24	1.05	1.55	1.17	154.5
IP_083997.1	XM_006711986.1	IFT172	1.37	1.07	0.75	1.23	0.98	1.02	0.84	591.5
IP_093452.1	NM_001130158.1	MYO1B	1.26	1.33	1.56	1.34	1.16	1.35	1.53	179.5
IP_093452.1	NM_001130158.1	MYO1B	1.26	1.33	1.56	1.34	1.16	1.35	1.53	179.5
IP_131070.1	NM_017415.2	KLHL3	0.31	1.01	1.26	0.81	1.21	1.14	1.17	51
IP_218759.1	NM_005932.3	MIPEP	1.05	0.7	0.65	0.82	0.7	0.48	0.32	73
IP_300070.1	NM_031407.6	HUWE1	NA	NA	NA	NA	NA	NA	NA	NA
IP_282837.1	NM_152227.2	SNX5	1.05	1.15	1.17	1.17	0.9	1.41	0.95	131.5
IP_297789.1	NM_021804.2	ACE2	NA	NA	NA	NA	NA	NA	NA	NA
IP_118360.1	NM_015236.4	LPHN3	1.46	1.13	0.53	1.42	1.26	0.46	0.83	637.5
IP_226829.1	NM_001204423.1	RGS6	1.79	1.49	2.66	1.92	1.91	1.94	1.14	124
IP_275635.1	NM_001271938.1	MEGF8	0.42	0.32	0.05	0.23	0.21	0.46	0.39	945.5
IP_138703.1	NM_001164239.1	DHX16	-0.46	0.23	-0.11	0.72	0.53	-0.21	0.25	158
IP_171446.1	NM_007126.3	VCP	1.39	1.7	1.46	1.84	2	1.31	1.62	255.5
IP_065690.1	NM_001037341.1	PDE4B	0.85	0.71	0.71	0.63	1.07	1.09	1.23	239.5
IP_065690.1	NM_001037341.1	PDE4B	0.85	0.71	0.71	0.63	1.07	1.09	1.23	239.5
IP_121429.1	XM_005262706.1	PRDM5	1.12	1.38	1.06	1.27	1.23	1.2	1.3	159
IP_246199.1	NM_012426.4	SF3B3	1.42	1.23	1.26	0.85	1.17	1.36	0.97	565.5
IP_253654.1	NM_015355.2	SUZ12	1.35	2.24	2.55	1.99	2.44	2.42	2.56	148.5
IP_258437.1	NM_001288653.1	CLTC	1.23	1.5	1.43	1.79	1.11	1.69	1.69	98
IP_278463.1	NM_014225.5	PPP2R1A	0.9	1.38	1.18	1.65	1.35	1.37	1.21	219.5
IP_289475.1	XM_006723977.1	DYRK1A	1.23	2.75	3.03	2.99	2.5	2.8	2.3	143.5
IP_289475.1	XM_006723977.1	DYRK1A	1.23	2.75	3.03	2.99	2.5	2.8	2.3	143.5
IP_226053.1	XM_006720076.1	ESR2	1.2	0.54	0.83	0.37	0.3	0.37	0.65	68
IP_227987.1	NM_005065.5	SEL1L	1.44	0.99	1.18	1.24	0.63	1.17	1.07	40
IP_074114.1	XM_006711183.1	RC3H1	2.68	1.12	0.9	1.11	1.33	0.88	0.53	526
IP_206268.1	NM_016162.3	ING4	1.35	1.91	2.19	1.83	1.97	1.79	2.01	23.21
IP_077686.1	NM_206933.2	USH2A	1.62	0.53	0.62	0.49	0.47	0.44	0.64	1.906
IP_086541.1	XM_005264223.1	EXOC6B	1.17	1.16	1.01	0.87	1.11	1.17	1.51	103
IP_086541.1	XM_005264223.1	EXOC6B	1.17	1.16	1.01	0.87	1.11	1.17	1.51	103
IP_105804.1	XM_005265458.2	SLMAP	4.08	2.25	1.97	2.54	2.6	2.1	2.02	NA
IP_105804.1	XM_005265458.2	SLMAP	4.08	2.25	1.97	2.54	2.6	2.1	2.02	NA
IP_144084.1	NM_002726.4	PREP	1.13	0.92	0.74	0.7	0.6	0.83	0.69	150.5
IP_203555.1	NM_024556.3	FAM118B	1.35	1.16	1.27	1.05	1.26	1.2	1.65	59
IP_106459.1	XM_005264718.1	PDZRN3	0.74	0.62	0.3	0.54	0.81	0.68	0.52	93
IP_220265.1	NM_030911.3	CDADC1	1.48	1.3	0.93	1.87	0.96	1.39	1.76	76
IP_257217.1	XM_005257286.1	HOXB8	1.34	1.69	1.53	1.52	1.51	1.49	1.4	40.83
IP_070359.1	NM_001172649.2	CELF3	0.51	1.45	1.5	1.6	1.13	1.51	1.43	102
IP_282467.1	NM_001281520.1	MCM8	1.19	0.93	1	1.15	1	0.69	0.95	126
IP_178088.1	NM_007101.3	SARDH	0.43	0.56	0.73	0.53	0.46	0.76	0.31	140.5
IP_065384.1	NM_001145511.1	NFIA	1.87	2.8	2.79	2.7	2.92	2.75	3.13	43
IP_094744.1	NM_015040.3	PIKFYVE	1.28	1.26	0.94	0.86	1.38	0.95	1.55	860
IP_109492.1	NM_032169.4	ACAD11	1.63	0.68	0.08	0.86	0.51	0.74	0.75	94.5
IP_100460.1	NM_001278270.1	TADA3	0.48	1.03	0.58	0.98	1.08	0.55	1.35	NA
IP_059797.1	NM_020765.2	UBR4	0.58	1.24	0.69	2	1.28	1.49	0.93	1.262
IP_077115.1	NM_025179.3	PLXNA2	0.67	0.96	1.13	1.16	0.93	1.04	1.04	647
IP_079419.1	XM_006711802.1	RYR2	0.33	0.48	0.74	0.19	0.6	0.96	0.49	2.344
IP_201727.1	NM_001077690.1	ALG9	1.68	1.12	1.42	1.59	1.4	1.03	1.65	190.5
IP_301012.1	NM_001286074.1	TAF1	NA	NA	NA	NA	NA	NA	NA	NA
IP_283113.1	NM_012255.3	XRN2	1.66	1.3	0.93	1.55	0.65	1.69	1.47	75
IP_122386.1	XM_005263214.2	ARHGAP10	1.22	0.85	0.98	0.69	0.76	0.88	0.73	194
IP_063779.1	XM_006710795.1	PTPRF	0.27	0.74	-0.1	0.46	0.96	0.68	1.05	849
IP_063779.1	XM_006710795.1	PTPRF	0.27	0.74	-0.1	0.46	0.96	0.68	1.05	849
IP_128353.1	NM_000859.2	HMGCR	1.3	0.95	1.44	0.76	1.25	0.64	0.77	350
IP_193108.1	NM_000480.2	AMPD3	1.27	1.01	0.84	1.33	1.14	1.3	0.7	333.5
IP_166378.1	NM_001135703.2	LRP12	0.93	0.63	0.68	0.51	0.52	0.8	0.63	29.86
IP_091171.1	NM_017892.3	PRPF40A	1.97	1.25	0.85	1.16	1.81	0.9	1.21	296.5
IP_194797.1	XM_005253041.2	RAG1	0.73	0.64	0.52	0.73	1.14	0.7	0.66	431
IP_258435.1	NM_001288653.1	CLTC	1.32	1.49	1.75	1.62	1.67	1.14	1.02	601
IP_178558.1	NM_017617.3	NOTCH1	1.62	0.7	0.84	1.24	0.41	0.77	0.68	253.5
IP_237435.1	NM_002569.2	FURIN	1.16	0.71	1.15	0.71	0.81	0.75	0.68	93.5
IP_131404.1	NM_032289.2	PSD2	0.59	0.78	1.22	1.04	1.27	1.02	1.45	67.5
IP_150365.1	NM_015204.2	THSD7A	0.87	0.65	0.67	0.19	1.06	0.15	1.04	145
IP_173780.1	NM_005392.3	PHF2	1	0.77	0.55	0.75	0.28	0.48	0.69	224.5
IP_196812.1	XM_005273878.2	EML3	0.16	0.26	0.26	0.27	0.62	0.15	0.39	356
IP_212975.1	XM_006719676.1	NAV3	1.54	1	0.75	1.5	1.4	1.27	1.51	941
IP_247780.1	XM_006721181.1	ANKRD11	1.69	-0.09	-0.44	-0.08	-0.19	-0.07	-0.01	1.255
IP_252727.1	NM_152914.2	C17orf103	0.74	1.29	1.49	1.33	1.39	1.24	1.23	12.76
IP_270877.1	NM_001136195.1	TNPO2	0.73	0.66	0.92	0.51	0.71	0.2	0.68	335.5
IP_301042.1	NM_181672.2	OGT	NA	NA	NA	NA	NA	NA	NA	NA
IP_301042.1	NM_181672.2	OGT	NA	NA	NA	NA	NA	NA	NA	NA
IP_221589.1	XM_005254100.2	ITGBL1	1.51	0.91	0.83	0.74	0.83	0.83	0.91	65.49
IP_116291.1	NM_001130086.1	ABLIM2	0.47	0.58	0.33	0.2	0.56	0.57	0.5	40.08
IP_188119.1	NM_005445.3	SMC3	1.68	1.86	1.5	2.04	1.93	1.91	2.06	537.5
IP_091025.1	NM_004543.4	NEB	1	0.72	0.77	0.29	0.81	1.04	0.64	1.475
IP_181682.1	NM_004641.3	MLLT10	2.03	1.75	1.67	1.68	1.87	1.6	1.86	389
IP_104823.1	NM_006030.2	CACNA2D2	1.53	1.15	0.93	1.12	1.11	1.01	0.75	NA
IP_268117.1	NM_003938.6	AP3D1	0.2	1	0.89	0.81	0.82	1.24	1.31	93.5
IP_219769.1	NM_002015.3	FOXO1	1.39	1.02	0.82	1.04	1.23	1.15	0.85	48.19
IP_061483.1	NM_001048199.2	RCC1	0.55	0.75	0.87	0.85	0.9	1	0.95	89
IP_105812.1	XM_005265458.2	SLMAP	2.52	2.36	1.95	2.33	2.25	1.77	2.39	NA
IP_105812.1	XM_005265458.2	SLMAP	2.52	2.36	1.95	2.33	2.25	1.77	2.39	NA
IP_129146.1	XM_005272085.2	MCTP1	1.36	1.89	1.07	1.35	1.41	1.55	1.24	31
IP_233969.1	NM_004998.3	MYO1E	1.05	1.02	0.89	1.04	1.28	1.19	1.02	51.5
IP_065379.1	NM_001145511.1	NFIA	3.01	2.66	2.62	2.61	2.72	2.72	2.82	191.5
IP_295062.1	NM_001098.2	ACO2	1.57	1.11	0.89	1.47	0.91	1.15	1.12	291.5
IP_246299.1	NM_001740.4	CALB2	1.59	1.55	1.81	1.94	1.95	1.82	2	29.68
IP_093546.1	XM_006712646.1	HECW2	1.33	0.63	0.99	0.43	0.14	0.24	0.38	477.5
IP_234241.1	NM_016530.2	RAB8B	1.93	1.52	1.87	1.67	1.62	1.74	1.52	22.4
IP_234291.1	NM_006537.3	USP3	1.92	1.51	2.18	1.93	1.13	2	1.71	133
IP_059760.1	NM_170726.2	ALDH4A1	1.1	0.77	0.82	0.45	0.78	0.74	1.23	23.14
IP_172519.1	XM_005252218.2	TRPM3	1.5	1.21	1.21	2.13	1.09	1.12	1.22	732.5
IP_172519.1	XM_005252218.2	TRPM3	1.5	1.21	1.21	2.13	1.09	1.12	1.22	732.5
IP_186151.1	NM_004969.3	IDE	1.31	1.83	2.02	1.69	2	2.15	1.71	289
IP_212161.1	NM_020762.2	SRGAP1	1.53	0.84	0.51	0.86	0.32	0.85	1.07	26.45
IP_097332.1	XM_006712878.1	HDAC4	0.19	0.54	0.79	0.42	0.48	0.74	0.63	NA
IP_186621.1	NM_020123.3	TM9SF3	2.12	2.36	3.28	2.4	2.35	1.91	2.2	113.5
IP_101943.1	NM_015551.1	SUSD5	0.5	0.12	0.07	-0.23	0.11	0.1	0.1	NA
IP_141305.1	NM_032538.1	TTBK1	1.3	0.53	0.48	0.07	0.63	1.12	0.16	443.5
IP_142111.1	NM_001270472.1	MCM3	1.06	0.92	0.67	1.05	1	1.16	0.62	103.5
IP_178050.1	NM_001080483.2	TMEM8C	0.58	1.07	1.27	0.56	1.63	0.7	0.9	30.5
IP_203049.1	NM_003105.5	SORL1	0.79	0.61	0.31	-0.07	0.45	1.7	0.31	314
IP_092026.1	XM_005246479.1	METTL5	1.32	1.35	1.32	1.43	1.5	1.05	1.58	67.5
IP_065296.1	NM_021080.3	DAB1	1.56	2.08	2.88	1.85	1.79	1.73	1.87	158.5
IP_186201.1	XM_005269694.2	MYOF	1.45	0.82	0.94	0.96	1	0.62	1.01	825.5
IP_234334.1	NM_003922.3	HERC1	3.2	1.07	0.96	0.87	0.76	0.83	1.17	542
IP_245270.1	XM_005256178.2	C16orf70	1.61	1.97	2.34	2.17	2.18	1.93	1.76	156
IP_065587.1	NM_020925.2	CACHD1	1.11	0.96	0.8	1.11	1.33	1.7	1.89	477.5
IP_073232.1	NM_003115.4	UAP1	1.4	0.74	0.79	-0.01	0.73	0.95	0.59	73.5
IP_073232.1	NM_003115.4	UAP1	1.4	0.74	0.79	-0.01	0.73	0.95	0.59	73.5
IP_074797.1	NM_001357.4	DHX9	1.29	0.93	0.61	0.65	0.96	0.61	1.32	590
IP_089793.1	NM_001142274.1	CLASP1	1.86	1.19	1.19	1.16	1.3	1.28	1.2	568.5
IP_174978.1	XM_005251781.1	LPAR1	2.66	1.62	1.35	1.45	1.48	1.87	1.96	116
IP_253080.1	XM_005258027.1	SUPT6H	1.3	1.29	1.71	1.17	1.29	0.92	1.01	536.5
IP_058812.1	NM_004958.3	MTOR	1.29	1.45	0.88	1.97	1.41	1.53	1.6	1,150.5
IP_068129.1	NM_001204269.1	KCNA2	0.58	1.03	1.11	1.3	0.72	0.68	1.31	38
IP_209503.1	XM_005268752.2	KCNH3	0.52	0.32	0.35	0.86	-0.07	-0.03	0.33	392
IP_260442.1	NM_001282314.1	EXOC7	1.45	1.19	1.16	1.4	1.14	1.28	1.14	28.31
IP_260442.1	NM_001282314.1	EXOC7	1.45	1.19	1.16	1.4	1.14	1.28	1.14	28.31
IP_260442.1	NM_001282314.1	EXOC7	1.45	1.19	1.16	1.4	1.14	1.28	1.14	28.31
IP_260442.1	NM_001282314.1	EXOC7	1.45	1.19	1.16	1.4	1.14	1.28	1.14	28.31
IP_260442.1	NM_001282314.1	EXOC7	1.45	1.19	1.16	1.4	1.14	1.28	1.14	28.31
IP_293790.1	XM_006724242.1	MCM5	1.6	0.79	1.16	0.25	0.69	0.24	0.31	286
IP_070315.1	XM_005245509.1	SNX27	2.31	1.42	1.66	1.67	1.12	1.94	1.74	91
IP_092940.1	NM_182678.2	UBE2E3	2.9	2.54	2.36	2.53	3.27	3.3	1.89	22.13
IP_177051.1	NM_001130438.2	SPTAN1	1.56	1.41	1.73	2.11	2.07	1.63	1.64	1.16
IP_177051.1	NM_001130438.2	SPTAN1	1.56	1.41	1.73	2.11	2.07	1.63	1.64	1.16
IP_214322.1	NM_018171.3	APPL2	1.14	0.95	1.03	0.67	0.69	1.08	0.98	277
IP_235255.1	XM_005254404.1	MYO9A	1.36	1.05	1.08	0.62	1.11	1.26	1.04	1.215
IP_263633.1	NM_020648.5	TWSG1	1.45	0.92	0.87	1	0.9	1.02	0.77	70
IP_287296.1	XM_006723769.1	PRPF6	0.96	1.07	1.63	1.14	0.85	1.23	1.6	334.5
IP_138450.1	NM_021904.2	GABBR1	1.4	1.14	0.96	1.5	1.66	1.39	0.8	125.5
IP_247255.1	NM_017740.2	ZDHHC7	1.06	0.83	0.98	0.81	1.1	0.93	0.88	24.29
IP_300852.1	NM_021120.3	DLG3	NA	NA	NA	NA	NA	NA	NA	NA
IP_127316.1	NM_003711.3	PPAP2A	1.06	1.25	0.35	0.38	0.3	0.85	1.14	20.55
IP_127316.1	NM_003711.3	PPAP2A	1.06	1.25	0.35	0.38	0.3	0.85	1.14	20.55
IP_268073.1	XM_005259500.1	CSNK1G2	0.99	0.86	0.97	1.22	0.71	0.88	0.71	115.5
IP_143977.1	XM_005267100.1	SIM1	1.26	0.97	0.45	1.21	1.08	0.76	1.36	48.5
IP_249696.1	NM_015229.3	CLUH	0.56	1.11	1.66	0.91	1.4	0.78	0.81	288
IP_162875.1	NM_001145159.2	INTS9	1.52	1.16	1.25	1.3	1.6	1.42	1.08	17
IP_127649.1	XM_006714589.1	RNF180	1	1.19	1.25	1.33	0.91	0.67	1.16	154.5
IP_193164.1	NM_014633.3	CTR9	1.63	1.25	1.11	1.27	0.95	0.84	1.4	440.5
IP_198121.1	NM_130443.3	DPP3	0.93	0.86	1.35	0.81	0.48	0.88	1.26	73.5
IP_302955.1	NM_001152.4	SLC25A5	NA	NA	NA	NA	NA	NA	NA	NA
IP_224763.1	XM_005267262.1	SEC23A	1.01	1.15	1.17	0.92	0.85	0.9	1.17	346
IP_231379.1	NM_001036.3	RYR3	1.09	0.95	1.35	1.08	1.27	1.08	0.89	2.254
IP_129243.1	NM_000439.4	PCSK1	1.51	0.97	0.93	0.66	0.73	0.91	1.38	174.5
IP_220987.1	NM_015057.4	MYCBP2	1.9	1.51	1.84	1.69	1.45	1.35	1.65	2,243.5
IP_247221.1	NM_001272075.1	USP10	0.67	1.04	1.21	1.12	1.06	1.37	1.03	211
IP_286782.1	NM_005560.4	LAMA5	0.49	-0.04	0.13	-0.33	0.01	0.27	-0.18	1.671
IP_067711.1	NM_001142551.1	WDR47	2.05	1.36	1.44	1.3	1.04	1.57	1.29	244
IP_077586.1	NM_001270616.1	PROX1	1.1	2.7	2.79	3	2.53	2.53	2.74	72
IP_079509.1	NM_001282778.1	RGS7	1.62	1.59	1.67	1.95	1.85	1.47	1.89	83
IP_084494.1	NM_016441.2	CRIM1	0.88	1.12	1.17	1.01	1.04	1.14	1.39	354.5
IP_087140.1	NM_001282597.1	CTNNA2	0.67	1.37	1.25	1.67	1.86	0.7	1.56	224
IP_087145.1	NM_001282597.1	CTNNA2	1.73	1.3	1.81	1.28	1.54	1.87	1.3	448.5
IP_093644.1	NM_012433.2	SF3B1	1.47	1.6	1.6	1.53	1.93	1.45	1.27	557
IP_125703.1	NM_003966.2	SEMA5A	0.73	0.57	0.53	0.9	0.67	0.85	0.47	416.5
IP_126550.1	NM_153013.4	NADK2	1.85	1.17	1.28	1.36	1.37	1.1	1.15	14
IP_132031.1	XM_005268453.2	PCDH1	0.35	0.73	1.18	0.3	1.19	0.29	0.68	198.5
IP_133833.1	XM_005265950.1	TENM2	1.33	1	1.14	1.19	1.11	1.79	1.09	847.5
IP_137065.1	NM_030810.3	TXNDC5	0.95	0.52	0.32	0.39	0.51	0.51	0.63	133
IP_138452.1	NM_021904.2	GABBR1	1.23	1.15	1.39	0.92	1.48	1.15	1.41	196
IP_145603.1	NM_172105.3	EYA4	1.49	2.36	1.96	1.76	1.67	2.72	2.11	50.5
IP_145603.1	NM_172105.3	EYA4	1.49	2.36	1.96	1.76	1.67	2.72	2.11	50.5
IP_145603.1	NM_172105.3	EYA4	1.49	2.36	1.96	1.76	1.67	2.72	2.11	50.5
IP_145603.1	NM_172105.3	EYA4	1.49	2.36	1.96	1.76	1.67	2.72	2.11	50.5
IP_147586.1	NM_001006932.1	RPS6KA2	-0.36	0.04	-0.34	0.05	0.04	-0.16	-0.09	261.5
IP_153822.1	NM_012431.2	SEMA3E	0.41	0.35	0.24	0.07	0.5	0.4	0.48	169.5
IP_157083.1	NM_005631.4	SMO	1.53	1.13	1.12	1.08	1.15	1.1	1.08	176.5
IP_165697.1	NM_018444.3	PDP1	0.67	0.92	1.2	1.11	1.14	0.97	0.8	157
IP_166497.1	NM_177531.4	PKHD1L1	-0.15	0.61	0.88	0.69	0.66	0.18	0.61	147
IP_167909.1	XM_006716535.1	ZC3H3	0.93	-0.19	-0.2	0.09	-0.1	-0.11	0.01	239
IP_168244.1	NM_015201.3	BOP1	-0.41	-0.19	-0.23	-0.26	-0.22	-0.1	-0.26	242.5
IP_174934.1	NM_153366.3	SVEP1	1.14	0.7	0.6	0.4	0.8	0.81	0.36	1.698
IP_176109.1	NM_012197.3	RABGAP1	1.97	1.37	1.73	1.37	1.43	1	1.23	130.5
IP_183405.1	NM_014576.3	A1CF	0.98	0.94	0.53	0.76	1.13	0.95	0.84	233.5
IP_186699.1	NM_003061.2	SLIT1	1.66	0.8	0.98	0.47	0.71	0.63	1	321.5
IP_195076.1	NM_021117.3	CRY2	0.51	0.82	1.06	0.87	0.17	0.14	1.43	194
IP_196153.1	XM_005273834.1	PATL1	0.94	0.84	0.72	0.86	0.28	0.85	1.21	59
IP_207854.1	NM_152989.3	SOX5	1.09	2.42	2.28	2.37	2.2	2.55	2.21	272
IP_209881.1	NM_030809.2	CSRNP2	0.41	0.39	0.75	0.3	0.67	0.71	0.36	37.08
IP_210404.1	XM_005268951.2	CSAD	0.4	0.34	0.49	0.24	-0.04	-0.03	0.13	157.5
IP_211595.1	NM_002332.2	LRP1	0.37	0.44	0.47	0.78	0.76	0.61	0.23	1,091.5
IP_214189.1	NM_003299.2	HSP90B1	1.47	1.17	1.2	0.34	1.07	1.47	0.95	266
IP_216114.1	NM_032590.4	KDM2B	1.72	1.14	1.12	1.16	0.89	1.39	1.31	54
IP_219686.1	NM_207361.4	FREM2	0.03	-0.01	0.04	0.04	0.09	-0.12	0.08	1.154
IP_224663.1	XM_005268128.1	BRMS1L	1.85	1.96	1.63	2.29	1.61	1.72	2.16	116.5
IP_229053.1	XM_005267398.2	EML1	-0.57	0.88	0.43	0.47	1.03	1.39	0.73	155.5
IP_229053.1	XM_005267398.2	EML1	-0.57	0.88	0.43	0.47	1.03	1.39	0.73	155.5
IP_253844.1	NM_013975.3	LIG3	1.31	1.07	0.9	0.76	0.96	1.4	1.35	22.55
IP_256961.1	NM_002265.5	KPNB1	1.74	1.82	1.89	1.34	1.7	1.74	2.16	132
IP_263269.1	NM_001071.2	TYMS	1.18	1.16	1.49	1.62	0.54	1.37	1.16	21.76
IP_263551.1	NM_005559.3	LAMA1	0.23	0.16	0.38	0.29	-0.07	-0.11	0.07	1.227
IP_269394.1	NM_001272034.1	STXBP2	0.91	0.16	0.54	-0.6	0.05	0.55	-0.09	252.5
IP_270146.1	NM_001243121.1	PDE4A	0.54	0.19	-0.11	1.08	-0.13	0.59	1.07	310.5
IP_270996.1	NM_002501.3	NFIX	2.48	2.35	2.24	1.81	2.72	1.77	2.48	44
IP_275563.1	NM_001270614.1	DEDD2	0.73	0.46	0.39	0.63	0.34	0.41	0.24	74.5
IP_276296.1	NM_007056.2	CLASRP	0.7	0.36	0.08	0.18	-0.29	0.41	0.26	210.5
IP_282867.1	NM_020536.4	CSRP2BP	1.98	0.69	0.52	0.27	0.12	0.81	1.12	338.5
IP_285456.1	NM_020708.4	SLC12A5	0.87	0.97	0.92	0.9	0.82	0.84	0.56	478.5
IP_290553.1	NM_015151.3	DIP2A	0.89	0.16	0.42	0.42	-0.01	0.05	0.04	633.5
IP_206239.1	XM_006718960.1	CHD4	1.55	1.19	1.16	1.23	1.28	1.26	1.13	538
IP_178547.1	NM_017617.3	NOTCH1	0.85	0.73	0.71	0.57	0.82	1.15	0.84	571
IP_257578.1	XM_005257059.2	COL1A1	0.48	1.2	1.12	1.26	1.01	1.24	1.24	381.5
IP_176270.1	NM_182487.3	OLFML2A	1.35	0.56	0.6	0.45	0.43	0.3	0.79	161
IP_250932.1	NM_000937.4	POLR2A	1.13	0.76	0.2	1.08	0.49	0.63	1.26	199
IP_261556.1	NM_001256433.2	PCYT2	0.89	0.39	0.3	0.49	0.52	0.74	0.59	23.56
IP_186169.1	XM_006717898.1	EXOC6	1.78	1.67	1.45	2.04	1.19	1.81	1.77	63
IP_249484.1	NM_006445.3	PRPF8	1.93	1.69	1.94	1.74	1.33	1.9	1.9	213.5
IP_265986.1	XM_006722426.1	NEDD4L	0.52	1.1	0.53	0.66	1.46	0.95	1.54	226.5
IP_188867.1	NM_003252.3	TIAL1	1.69	2.22	1.86	2.22	1.68	2.28	2	139
IP_188867.1	NM_003252.3	TIAL1	1.69	2.22	1.86	2.22	1.68	2.28	2	139
IP_264173.1	NM_003831.3	RIOK3	1.57	1.61	1.83	1.23	1.23	1.78	1.71	132.5
IP_127464.1	NM_001252226.1	PLK2	1.07	1.03	0.99	0.77	1.01	1.41	1.19	21.79
IP_223658.1	NM_032876.5	AJUBA	1.66	0.61	0.64	0.35	0.64	0.93	0.89	108
IP_173521.1	NM_004560.3	ROR2	1.02	0.04	-0.13	-0.57	0.33	-0.3	0.24	200.5
IP_216684.1	XM_005253555.1	DNAH10	0.14	0.43	0.41	0.59	0.37	0	0.07	1.979
IP_226244.1	NM_002382.4	MAX	3.06	3.29	3.21	3.19	3.25	3.16	3.39	46
IP_226244.1	NM_002382.4	MAX	3.06	3.29	3.21	3.19	3.25	3.16	3.39	46
IP_254475.1	XM_006722117.1	SRCIN1	1.84	0.74	0.47	1.11	0.59	0.52	0.9	510.5
IP_120006.1	NM_152542.4	PPM1K	0.52	0.86	0.68	0.73	1.05	1.02	1	102
IP_120006.1	NM_152542.4	PPM1K	0.52	0.86	0.68	0.73	1.05	1.02	1	102
IP_297257.1	NM_181332.2	NLGN4X	NA	NA	NA	NA	NA	NA	NA	NA
IP_297257.1	NM_181332.2	NLGN4X	NA	NA	NA	NA	NA	NA	NA	NA
IP_246801.1	NM_199355.2	ADAMTS18	1.25	0.69	0.78	0.55	0.62	1.12	0.72	51
IP_144939.1	NM_001029858.3	SLC35F1	1.13	1.09	0.97	1.23	1.23	1.12	0.98	35.14
IP_158882.1	NM_001199692.1	SLC4A2	1.38	0.21	-0.05	-0.38	-0.24	0.04	0.33	245.5
IP_163763.1	NM_001134296.1	AP3M2	0.46	0.61	0.25	1	0.33	0.13	0.51	50.5
IP_206406.1	NM_138425.2	C12orf57	1.35	0.05	-0.06	0.04	0.04	0.06	0.03	17.84
IP_105928.1	NM_001173468.1	PDHB	0.84	1.1	1.16	1.19	1.06	1.06	1.08	100.5
IP_242374.1	XM_005255450.2	USP31	1.4	0.68	0.99	0.51	1.19	0.22	1.1	205
IP_285711.1	NM_020820.3	PREX1	1.5	1.01	0.8	1.32	0.54	1.48	0.92	229.5
IP_295420.1	XM_005261752.1	SCUBE1	2.41	0.69	0.34	0.12	1.89	0.33	0.63	276
IP_295420.1	XM_005261752.1	SCUBE1	2.41	0.69	0.34	0.12	1.89	0.33	0.63	276
IP_104686.1	NM_006841.4	SLC38A3	0.18	0.68	0.86	0.75	0.91	0.43	0.94	NA
IP_197262.1	NM_000932.2	PLCB3	0.53	0.29	0.54	0.26	0.46	0.38	0.21	541
IP_212231.1	NM_007191.4	WIF1	0.78	1.21	1.55	0.63	1.03	1.27	1.01	12.9
IP_218752.1	NM_148957.3	TNFRSF19	1.97	0.21	0.05	0.31	-0.43	0.17	0.29	124.5
IP_229063.1	XM_005267749.1	EVL	1.94	1.08	1.8	0.71	0.86	0.97	0.97	148.5
IP_233357.1	NM_000103.3	CYP19A1	0.89	0.73	0.81	0.57	0.68	0.69	0.97	178.5
IP_250716.1	NM_001270447.1	ACADVL	0.76	0.73	1.22	0.77	1.09	0.82	0.67	148.5
IP_231673.1	NM_003246.2	THBS1	1.06	1	1	0.79	0.69	1.04	0.86	179.01
IP_089629.1	NM_002830.3	PTPN4	2.16	1.9	1.59	1.86	2.17	1.49	1.89	426.5
IP_162496.1	NM_024940.6	DOCK5	1.1	0.91	0.75	1.01	0.96	0.89	0.83	554
IP_251082.1	XM_005256470.1	DNAH2	0.49	0.68	0.62	0.92	0.85	1.17	0.71	465.5
IP_273176.1	NM_001136156.1	ZNF507	0.37	0.55	0.43	0.33	0.24	0.36	0.41	175
IP_284917.1	NM_032107.4	L3MBTL1	1.39	0.73	1.19	0.37	1.01	1.2	0.6	50
IP_064259.1	NM_001243766.1	POMGNT1	1.75	1.45	1.98	1.71	1.26	0.96	1.37	87.5
IP_176089.1	NM_001100588.1	RC3H2	1.4	1.75	1.62	1.74	1.81	1.87	1.96	292.5
IP_177547.1	NM_007313.2	ABL1	1.05	0.84	0.73	0.68	0.73	1.14	1.82	438.5
IP_177547.1	NM_007313.2	ABL1	1.05	0.84	0.73	0.68	0.73	1.14	1.82	438.5
IP_195891.1	NM_015457.2	ZDHHC5	1.45	0.65	0.54	0.29	0.51	0.27	0.63	290
IP_304860.1	NM_020061.5	OPN1LW	NA	NA	NA	NA	NA	NA	NA	NA
IP_109773.1	NM_002718.4	PPP2R3A	1.09	1.09	1.19	1.22	1.17	1.13	1.12	522
IP_109773.1	NM_002718.4	PPP2R3A	1.09	1.09	1.19	1.22	1.17	1.13	1.12	522
IP_125283.1	XM_005248331.1	SDHA	-0.06	0.7	0.41	1.29	0.13	0.05	0.67	154.5
IP_183537.1	NM_018464.4	CISD1	1.25	0.96	0.72	0.87	0.78	0.86	0.78	24
IP_143701.1	XM_005248669.1	EPHA7	1.5	1.85	1.97	1.93	1.49	1.62	1.3	243
IP_301173.1	NM_001172436.1	PHKA1	NA	NA	NA	NA	NA	NA	NA	NA
IP_151988.1	NM_001014436.2	DBNL	0.48	0.48	0.68	0.68	0.43	0.24	0.7	41.41
IP_079187.1	NM_001037277.1	GGPS1	1.29	1.38	1.36	1.54	1.71	1.1	0.96	70.5
IP_106287.1	NM_198195.1	UBA3	1.09	1.55	1.75	1.61	1.67	1.61	1.75	130
IP_183650.1	NM_001204403.1	ANK3	1.55	1.15	1.12	0.85	0.51	1.53	1.64	788.5
IP_234329.1	NM_003922.3	HERC1	1.42	1.09	1.35	1.3	1.2	1.16	0.85	1.566
IP_064234.1	NM_001114172.1	PIK3R3	1.49	1.7	1.5	1.78	1.95	1.23	1.49	10.97
IP_121963.1	NM_030648.2	SETD7	0.7	0.83	0.74	0.95	1.29	0.82	0.57	131
IP_236469.1	NM_015154.1	MESDC2	0.9	0.35	0.2	0.22	0.16	0.68	-0.27	40
IP_251522.1	NM_153210.4	USP43	-0.3	0.1	-0.14	0.13	-0.03	-0.15	0.21	107
IP_260506.1	NM_022066.3	UBE2O	1.71	0.92	1.12	0.34	0.88	1.12	0.37	406
IP_130334.1	NM_001999.3	FBN2	0.24	0.32	0.24	0.28	0.33	0.3	0.16	1,264.5
IP_060154.1	NM_001113348.1	ECE1	0.77	0.73	0.66	0.57	0.24	-0.03	0.79	235
IP_060154.1	NM_001113348.1	ECE1	0.77	0.73	0.66	0.57	0.24	-0.03	0.79	235
IP_138634.1	NM_001025091.1	ABCF1	1.18	0.61	0.51	0.39	0.6	0.9	0.87	312
IP_174548.1	NM_005502.3	ABCA1	1.11	1.02	1.16	0.8	0.8	1.1	0.87	1,045.5
IP_059400.1	NM_015001.2	SPEN	2.81	0.17	-0.34	0.36	-0.11	0.26	0.06	1,770.5
IP_061674.1	NM_001020658.1	PUM1	1.48	1.37	1.33	1.86	2.02	1.83	1.18	322.5
IP_157602.1	NM_004717.2	DGKI	1.82	1.18	0.99	0.98	1.42	1.23	0.96	30.45
IP_245212.1	NM_004165.2	RRAD	0.64	0.76	0.46	0.47	0.69	0.67	0.5	85.5
IP_063778.1	XM_006710795.1	PTPRF	0.91	0.72	0.97	1.53	-0.27	0.06	0.94	871.5
IP_063778.1	XM_006710795.1	PTPRF	0.91	0.72	0.97	1.53	-0.27	0.06	0.94	871.5
IP_109054.1	NM_013336.3	SEC61A1	0.92	1.16	1.27	1.53	1.27	1.2	1.51	35.21
IP_246118.1	NM_001605.2	AARS	0.36	0.91	0.85	0.56	1.29	1.23	0.57	193.5
IP_251097.1	XM_005256470.1	DNAH2	0.73	0.67	0.31	-0.01	0.92	0.79	0.17	2.153
IP_101791.1	XM_006713017.1	STT3B	2.07	1.88	1.75	2.26	2.04	1.5	1.79	NA
IP_132786.1	NM_005211.3	CSF1R	0.69	0.27	-0.02	0.78	0.02	1.06	-0.29	74.5
IP_195225.1	XM_005253012.2	AMBRA1	1.61	1.56	1.54	1.75	1.29	1.44	1.33	124
IP_113214.1	NM_005017.2	PCYT1A	1	1.23	1	1.4	1.77	0.95	1.42	27.82
IP_268680.1	NM_020209.3	SHD	0.24	0.33	0.78	0.27	0.68	0.02	0.54	30.69
IP_062902.1	XM_005270390.2	SF3A3	0.96	1.34	0.84	1.17	1.19	1.71	1.01	94.5
IP_199247.1	XM_006718752.1	ARHGEF17	0.69	0.92	0.74	0.75	1.12	1.27	0.71	149.5
IP_096962.1	NM_001037131.2	AGAP1	1.84	1.16	0.87	1.26	1.27	1.44	0.82	NA
IP_146086.1	NM_006734.3	HIVEP2	1.49	0.49	1.03	0.29	0.28	0.08	0.32	577.5
IP_149878.1	NM_152744.3	SDK1	0.56	0	-0.07	-0.38	-0.41	0.27	-0.59	16.82
IP_230947.1	XM_005268271.2	UBE3A	2.73	1.68	1.5	1.46	1.81	1.55	1.55	371
IP_107601.1	XM_005247891.1	BOC	1.74	0.46	0.17	0.6	0.65	0.44	0.74	205
IP_094705.1	NM_001080475.2	PLEKHM3	1.79	0.86	1.19	0.95	0.62	1.17	0.61	334
IP_116239.1	NM_020777.2	SORCS2	0.84	0.58	0.13	1.04	0.94	0.63	0.58	164
IP_087903.1	NM_014014.4	SNRNP200	1.15	0.93	0.26	0.9	0.71	0.84	1.08	1,009.5
IP_123580.1	NM_021942.5	TRAPPC11	0.97	0.9	0.67	0.95	0.83	0.79	0.8	512.5
IP_154786.1	XM_005250674.2	BUD31	1	1.45	1.06	1.49	1.35	1.22	1.74	15.33
IP_192074.1	NM_139132.3	NUP98	0.89	0.85	1	0.93	0.87	1.03	1.11	14.61
IP_254248.1	XM_006721853.1	ACACA	1.51	1.14	1.17	1.26	1.08	1.22	1.45	169
IP_090748.1	NM_018557.2	LRP1B	1.38	1.1	1.21	0.83	1.77	1.14	0.97	1.167
IP_093016.1	NM_001258312.1	PDE1A	0.7	1.09	1.11	1.2	1.29	1.18	0.92	188.5
IP_164391.1	NM_003580.3	NSMAF	1.07	0.9	0.19	1.33	1.16	1.25	1.18	42.5
IP_164792.1	NM_024870.2	PREX2	0.93	1.25	0.48	1.15	1.8	1.38	1.42	49
IP_213748.1	NM_002595.4	CDK17	2.14	1.66	1.83	1.8	1.4	1.62	1.8	192.5
IP_293993.1	NM_006078.3	CACNG2	3.15	2.92	2.89	2.85	2.81	2.73	2.98	57.05
IP_296077.1	NM_001242899.1	PPP6R2	0.68	0.13	0.29	1.06	-0.55	-0.34	-0.31	99
IP_061664.1	NM_014676.2	PUM1	2.7	1.29	0.93	3.08	0.89	1.02	0.87	428.5
IP_074397.1	NM_001168238.1	ABL2	1.76	1.12	1.43	0.8	0.96	0.93	0.83	239.5
IP_074397.1	NM_001168238.1	ABL2	1.76	1.12	1.43	0.8	0.96	0.93	0.83	239.5
IP_100921.1	NM_001134382.2	IQSEC1	0.99	1.01	0.54	1.29	0.22	0.65	1.03	NA
IP_127756.1	NM_033228.2	TRIM23	1.94	1.46	1.29	1.81	1.65	0.99	1.01	71.5
IP_130205.1	NM_001202404.1	ALDH7A1	1.35	0.85	0.87	0.45	1.07	0.86	0.5	103
IP_198902.1	NM_001163817.1	DHCR7	1.09	0.95	0.86	1.12	0.95	1.36	0.4	55
IP_253778.1	NM_001094.4	ASIC2	1.21	1.35	1.2	1.18	1.28	1.79	1.73	127
IP_270971.1	NM_004461.2	FARSA	0.68	0.83	0.63	0.52	0.76	0.95	0.67	104.5
IP_300950.1	NM_181303.1	NLGN3	NA	NA	NA	NA	NA	NA	NA	NA
IP_300950.1	NM_181303.1	NLGN3	NA	NA	NA	NA	NA	NA	NA	NA
IP_110196.1	NM_001080412.2	ZBTB38	0.67	0.03	-0.16	0.22	0.07	-0.13	0.21	97
IP_193375.1	NM_032320.5	BTBD10	2.12	1.41	1.47	1.37	1.83	1.2	1.2	99
IP_283084.1	XM_005260768.1	RALGAPA2	1.17	0.88	1.26	1.11	0.86	1.27	0.71	744
IP_294057.1	XM_006724163.1	TMPRSS6	0.94	0.75	0.62	0.86	0.91	0.38	0.65	368.5
IP_257991.1	XM_006721728.1	ANKFN1	3.28	1.08	1.84	0.18	1.6	1.33	1.07	138
IP_265443.1	NM_001080467.2	MYO5B	0.87	0.63	0.75	0.71	0.24	0.64	0.55	389
IP_105334.1	NM_018313.4	PBRM1	1.56	1.33	1.42	1.38	1	1.61	1.64	NA
IP_237031.1	XM_006720544.1	NTRK3	0.86	1.27	1.21	1.04	1.24	1.29	1.14	249.5
IP_237031.1	XM_006720544.1	NTRK3	0.86	1.27	1.21	1.04	1.24	1.29	1.14	249.5
IP_241358.1	NM_014153.3	ZC3H7A	1.32	1.06	1.12	0.9	0.6	0.95	1.15	389.5
IP_250104.1	NM_001257328.1	ARRB2	0.71	0.84	0.83	0.81	1.11	0.46	1.31	131.5
IP_256193.1	NM_005474.4	HDAC5	0.37	0.47	0.49	0.43	0.68	-0.15	0.54	335
IP_260692.1	NM_001113491.1	2017-09-09	0.97	0.57	0.92	-0.05	0.84	0.58	0.62	112.5
IP_260692.1	NM_001113491.1	2017-09-09	0.97	0.57	0.92	-0.05	0.84	0.58	0.62	112.5
IP_260692.1	NM_001113491.1	2017-09-09	0.97	0.57	0.92	-0.05	0.84	0.58	0.62	112.5
IP_264838.1	XM_005258239.1	GALNT1	1.53	1.65	1.42	1.53	1.8	2.22	1.18	194.5
IP_304609.1	XM_005274692.1	ATP2B3	NA	NA	NA	NA	NA	NA	NA	NA
IP_061846.1	NM_012316.4	KPNA6	1.15	1.16	0.93	1.02	0.75	1.73	1.14	17.18
IP_197801.1	XM_005273988.2	PCNXL3	0.54	0.63	0.68	0.55	0.54	0.7	0.66	620
IP_083018.1	XM_006711869.1	LPIN1	0.22	0.27	0.51	-0.04	0.52	0.26	0.31	255
IP_083018.1	XM_006711869.1	LPIN1	0.22	0.27	0.51	-0.04	0.52	0.26	0.31	255
IP_111568.1	NM_001161566.1	TNIK	1.77	1.37	1.45	1.33	1.82	0.56	1.55	581.5
IP_118815.1	NM_014243.2	ADAMTS3	-0.04	0.69	0.69	0.63	0.69	0.69	0.85	428.5
IP_157182.1	NM_014997.3	KLHDC10	1.35	1.67	1.63	1.33	1.6	2.24	1.59	61.5
IP_157182.1	NM_014997.3	KLHDC10	1.35	1.67	1.63	1.33	1.6	2.24	1.59	61.5
IP_195241.1	NM_001205121.1	ATG13	2.19	1.23	1.14	1.28	0.53	1.17	1.07	158.5
IP_195241.1	NM_001205121.1	ATG13	2.19	1.23	1.14	1.28	0.53	1.17	1.07	158.5
IP_201681.1	NM_015191.1	SIK2	1.2	0.9	0.87	0.06	0.8	0.28	1.67	261
IP_228322.1	NM_001284280.1	SMEK1	2.69	1.62	1.81	1.46	1.82	1.81	1.96	16.39
IP_283369.1	XM_006723601.1	PYGB	-0.13	0.28	0.77	0.17	0.26	0.28	0.3	70
IP_298909.1	XM_006724566.1	CASK	NA	NA	NA	NA	NA	NA	NA	NA
IP_273309.1	NM_002333.3	LRP3	0.69	0.12	0.26	0.5	-0.04	0.24	0.4	81.5
IP_075271.1	NM_024529.4	CDC73	1.87	1.63	1.7	1.11	2.05	1.59	1.73	95.5
IP_127727.1	NM_197941.2	ADAMTS6	1.68	2.42	2.79	3.08	2.43	2.82	2.89	170.5
IP_061667.1	NM_014676.2	PUM1	1.43	1.37	1.34	1.69	1.06	1.61	1.63	326.5
IP_110349.1	NM_001251845.1	TRPC1	1.53	1.75	1.57	1.57	1.74	2.18	1.91	276.5
IP_143697.1	XM_005248669.1	EPHA7	2.39	1.8	2.01	2.29	2.5	1.73	1.44	421
IP_219456.1	NM_015678.4	NBEA	1.12	1.26	0.85	1.25	1.6	1.81	1.48	598.5
IP_287358.1	NM_018257.2	PCMTD2	0.96	0.4	0.48	0.36	-0.07	0.38	-0.06	33.5
IP_303947.1	XM_005262399.1	FGF13	NA	NA	NA	NA	NA	NA	NA	NA
IP_303947.1	XM_005262399.1	FGF13	NA	NA	NA	NA	NA	NA	NA	NA
IP_303947.1	XM_005262399.1	FGF13	NA	NA	NA	NA	NA	NA	NA	NA
IP_125889.1	NM_007118.2	TRIO	0.68	1.25	1.37	0.85	1.46	1.28	1.58	173.5
IP_171493.1	XM_006716716.1	UNC13B	1.22	0.94	0.61	1.05	0.58	0.5	0.84	381.5
IP_247361.1	NM_002163.2	IRF8	0.75	0.33	0.49	0.51	-0.05	0.68	0.53	156.5
IP_298093.1	NM_001173454.1	PDHA1	NA	NA	NA	NA	NA	NA	NA	NA
IP_298093.1	NM_001173454.1	PDHA1	NA	NA	NA	NA	NA	NA	NA	NA
IP_300849.1	NM_021120.3	DLG3	NA	NA	NA	NA	NA	NA	NA	NA
IP_169925.1	XM_006716864.1	VLDLR	0.33	1.13	1	1.29	1.29	1.07	1.18	187.5
IP_169925.1	XM_006716864.1	VLDLR	0.33	1.13	1	1.29	1.29	1.07	1.18	187.5
IP_157890.1	NM_030647.1	KDM7A	2.15	1.25	1.06	0.89	1.3	1.68	1.07	117.5
IP_122742.1	NM_000509.4	FGG	1.32	0.7	0.7	0.36	0.46	0.47	0.51	114
IP_193157.1	NM_014633.3	CTR9	1.79	1.26	1.26	1.2	0.95	1.33	1.1	245.5
IP_188263.1	XM_005270075.1	TCF7L2	2.16	2.34	2.36	2.73	1.97	2.05	2.32	17.61
IP_188263.1	XM_005270075.1	TCF7L2	2.16	2.34	2.36	2.73	1.97	2.05	2.32	17.61
IP_188263.1	XM_005270075.1	TCF7L2	2.16	2.34	2.36	2.73	1.97	2.05	2.32	17.61
IP_154220.1	XM_005250458.1	ANKIB1	2.04	1.4	1.76	1.8	1.78	1.18	1.67	15.96
IP_269359.1	NM_006702.4	PNPLA6	0.88	0.25	0.25	-0.35	0.28	0.52	0.54	446
IP_103789.1	NM_003074.3	SMARCC1	1.21	0.74	0.95	0.83	0.76	0.89	0.68	NA
IP_286016.1	NM_001258295.1	NFATC2	0.5	0.97	1.3	0.64	0.61	0.84	1	114.5
IP_235296.1	XM_005254445.2	PKM	1.15	1.16	0.87	0.95	1.58	1.19	1.31	15.5
IP_058122.1	NM_015557.2	CHD5	0.43	0.85	1.24	1.05	0.94	0.58	0.82	731
IP_067946.1	NM_001257360.1	AMPD2	1.1	0.94	1.01	1.08	1.4	0.46	0.54	136
IP_078817.1	NM_004481.3	GALNT2	1	1.07	1.06	1.47	1.13	0.87	1.31	193.5
IP_123241.1	NM_020870.3	SH3RF1	1.75	0.56	0.56	0.97	0.42	0.95	0.46	267.5
IP_140500.1	NM_015050.2	CMTR1	0.8	1.25	1.46	1.84	1.81	0.97	1.37	85.5
IP_151782.1	NM_080631.3	VPS41	0.87	1.18	1.26	1.26	1.25	1.1	1.13	184
IP_155370.1	NM_015908.5	SRRT	1.42	0.61	1.1	0.74	0.86	0.62	1.01	249
IP_161934.1	NM_001693.3	ATP6V1B2	1.74	0.79	0.47	0.77	1.3	0.26	0.36	212.5
IP_211184.1	NM_194359.2	RNF41	0.99	1.76	1.84	1.77	1.09	1.76	1.53	13.47
IP_239452.1	NM_032259.2	WDR24	1.64	0.86	1.37	1.43	0.7	0.98	0.26	186
IP_273346.1	NM_001166057.1	PEPD	1.02	0.78	0.64	0.58	0.61	0.82	1.02	26.05
IP_058356.1	NM_015215.3	CAMTA1	1.83	1.73	1.52	1.66	1.38	3.02	1.6	532
IP_069069.1	NM_004892.5	SEC22B	1.98	1.64	1.44	1.19	1.43	1.05	2.16	57.5
IP_071071.1	NM_000748.2	CHRNB2	0.18	0.4	1.49	1.65	0.06	0.04	0.81	115
IP_106701.1	NM_005233.5	EPHA3	0.83	1.25	1.15	1.27	0.98	1	1.48	125
IP_130762.1	NM_002715.2	PPP2CA	2.31	2.34	2.57	1.73	2.19	2.79	2.54	62
IP_159114.1	NM_020445.5	ACTR3B	1.24	0.81	1.2	0.98	1.14	0.39	0.83	123
IP_291961.1	XM_005261634.1	PI4KA	2.35	0.98	0.65	0.81	0.89	0.74	0.86	908
IP_077921.1	NM_021958.3	HLX	0.61	0.59	0.24	0.51	0.4	0.17	0.78	35
IP_109780.1	NM_002718.4	PPP2R3A	1.46	1.08	0.76	1.35	1.43	0.82	0.92	430
IP_109780.1	NM_002718.4	PPP2R3A	1.46	1.08	0.76	1.35	1.43	0.82	0.92	430
IP_181929.1	NM_001178124.1	ABI1	2.6	1.9	1.58	2.16	2.09	2.02	1.87	105.5
IP_183236.1	NM_001276451.1	DRGX	1.1	0.54	0.85	0.58	0.57	1.06	0.34	85.5
IP_186414.1	XM_005269427.1	SORBS1	1.9	1.48	1.54	1.32	1.26	2.17	1.65	590
IP_236192.1	XM_005254334.1	IDH3A	1.01	0.64	0.31	0.85	0.11	0.66	0.06	20.32
IP_246922.1	NM_015251.2	ATMIN	0.75	0.46	0.89	0.19	0.22	0.26	0.75	198
IP_074395.1	NM_001168238.1	ABL2	1.21	1.15	0.94	1.02	1.14	0.87	1.07	80.5
IP_074395.1	NM_001168238.1	ABL2	1.21	1.15	0.94	1.02	1.14	0.87	1.07	80.5
IP_255958.1	NM_005440.4	RND2	1.4	1.08	0.92	0.89	1.15	0.98	0.97	34.53
IP_132610.1	NM_014945.2	ABLIM3	1.42	1.45	1.32	1.24	1.2	1.45	1.43	273
IP_100292.1	NM_001033117.2	SRGAP3	1.29	1.19	1.32	1.07	1.7	1.3	1.34	NA
IP_100292.1	NM_001033117.2	SRGAP3	1.29	1.19	1.32	1.07	1.7	1.3	1.34	NA
IP_166738.1	NM_001040092.2	ENPP2	1.48	0.97	0.88	1.05	0.67	1.05	0.69	299.5
IP_174546.1	NM_005502.3	ABCA1	1.17	1.02	0.94	1.17	0.93	1.47	1.56	563
IP_182298.1	NM_001282391.1	EPC1	3.07	2.21	2.07	2.27	2.56	1.95	2.08	337
IP_198346.1	NM_206873.1	PPP1CA	1.48	1.12	1.2	1.11	1.18	1.04	0.87	66.5
IP_201290.1	XM_006718823.1	GRIA4	1.62	1.72	1.27	1.43	2.01	1.91	1.56	274.5
IP_253568.1	XM_006721923.1	NF1	2.09	1.53	1.37	1.03	0.98	1.41	1.42	1.187
IP_255594.1	NM_012448.3	STAT5B	1.09	1.29	1.02	1.17	1.82	0.74	0.9	98
IP_258615.1	XM_005257838.1	TBX4	0.99	0.68	1.15	-0.01	1.02	0.18	1.12	127.5
IP_133183.1	NM_003118.3	SPARC	2.26	2.06	2.32	2.22	2.14	1.94	1.69	99
IP_133231.1	NM_001258020.1	GRIA1	1.28	1.18	0.76	0.4	0.42	0.84	0.22	91.5
IP_226240.1	NM_145112.2	MAX	3.03	3.29	3.32	3.3	3.15	3.16	3.42	46
IP_226240.1	NM_145112.2	MAX	3.03	3.29	3.32	3.3	3.15	3.16	3.42	46
IP_256833.1	NM_006178.3	NSF	1.04	1.33	1.23	1.41	1.06	1.58	0.84	52.5
IP_289813.1	NM_001040424.2	PRDM15	2.14	0.81	0.87	0.8	0.41	1.07	0.41	66.5
IP_083362.1	NM_016047.3	SF3B14	1.44	1.25	0.94	1.06	1.25	1.05	1.07	20.08
IP_084910.1	XM_005264459.2	MTA3	1.76	1.3	0.63	0.91	1.49	1.5	1.29	42
IP_084910.1	XM_005264459.2	MTA3	1.76	1.3	0.63	0.91	1.49	1.5	1.29	42
IP_118794.1	NM_003759.3	SLC4A4	1.12	1.06	1.13	0.97	1.4	1.12	1.17	458
IP_150454.1	NM_001163148.1	ETV1	2.08	2.32	2.18	2.53	1.91	1.68	2.06	162
IP_176354.1	NM_001123369.1	PPP6C	1.41	1.54	1.42	1.76	1.61	1.53	1.47	29.96
IP_178814.1	NM_001185090.1	GRIN1	1.85	1.62	1.42	1.21	1.21	1.69	0.48	349
IP_253336.1	NM_001085454.1	GIT1	0.53	0.42	0.44	0.36	0.19	0.44	0.32	133.5
IP_253336.1	NM_001085454.1	GIT1	0.53	0.42	0.44	0.36	0.19	0.44	0.32	133.5
IP_270955.1	NM_000159.3	GCDH	0.91	0.68	0.64	0.92	0.69	0.91	0.81	32.63
IP_257575.1	XM_005257059.2	COL1A1	0.84	1.17	0.8	1.16	1.33	1	0.96	213
IP_167514.1	XM_005251077.2	TRAPPC9	0.32	0.65	0.36	1.26	0.1	0.5	0.65	294.5
IP_202174.1	XM_006718938.1	PCSK7	1.21	0.7	0.97	0.98	0.54	0.35	0.83	103.5
IP_062981.1	XM_006710527.1	MACF1	1.39	0.78	0.8	0.8	1	0.52	0.51	3,458.5
IP_062981.1	XM_006710527.1	MACF1	1.39	0.78	0.8	0.8	1	0.52	0.51	3,458.5
IP_101381.1	NM_001144382.1	PLCL2	0.07	0.71	1.11	0.35	0.6	0.67	0.33	NA
IP_129477.1	NM_001281471.1	PPIP5K2	1.07	1.56	0.93	2.51	1.18	3.03	1.16	284
IP_129477.1	NM_001281471.1	PPIP5K2	1.07	1.56	0.93	2.51	1.18	3.03	1.16	284
IP_158496.1	XM_006716185.1	PDIA4	0.12	0.35	-0.28	0.35	0.72	-0.25	0.39	100
IP_179091.1	XM_006717289.1	EHMT1	1.24	0.61	0.64	0.41	0.63	0.58	0.5	77
IP_301873.1	NM_001939.2	DRP2	NA	NA	NA	NA	NA	NA	NA	NA
IP_131236.1	NM_016604.3	KDM3B	1.85	1.3	1.35	1.09	1.41	1.43	1.13	758.5
IP_197953.1	NM_005146.4	SART1	0.89	0.49	0.08	0.38	0.35	0.34	0.46	310
IP_253333.1	NM_014030.3	GIT1	0.07	0.44	0.47	0.16	0.16	0.9	0.24	225
IP_253333.1	NM_014030.3	GIT1	0.07	0.44	0.47	0.16	0.16	0.9	0.24	225
IP_084567.1	XM_006712035.1	HEATR5B	1.04	0.77	0.96	1.36	0.65	0.62	0.98	228
IP_090889.1	NM_015630.3	EPC2	2.36	2.3	1.82	2.93	2.33	1.74	2.16	187.5
IP_163784.1	NM_001556.2	IKBKB	1.14	0.83	0.84	0.92	0.22	0.53	0.39	289.5
IP_266665.1	NM_005786.5	TSHZ1	1.86	0.94	0.65	1.1	1.55	0.71	1.07	147
IP_192977.1	XM_005252832.1	DENND5A	1.42	1.6	1.53	1.53	1.43	1.8	1.46	34
IP_243028.1	NM_004320.4	ATP2A1	0.5	0.84	0.99	1.18	0.92	1.23	0.92	347.5
IP_067953.1	NM_139156.3	AMPD2	1.35	0.86	0.47	1.04	1.05	1.28	0.88	328.5
IP_068033.1	NM_001270768.1	STRIP1	1.03	1.11	1.55	1.75	1.2	0.9	1.03	317.5
IP_091126.1	NM_001005747.2	CACNB4	1.93	1.5	2.47	1.39	1.14	1.37	1.45	213
IP_091126.1	NM_001005747.2	CACNB4	1.93	1.5	2.47	1.39	1.14	1.37	1.45	213
IP_092239.1	XM_005246246.1	RAPGEF4	2.04	1.62	1.35	2.37	1.95	1.74	1.47	334.5
IP_104401.1	NM_001164710.1	AMT	1.29	0.66	0.74	0.58	0.94	0.55	1.02	NA
IP_164756.1	XM_005251136.1	ARFGEF1	2.13	1.77	1.98	2.05	1.36	1.36	1.54	252
IP_255847.1	NM_003766.3	BECN1	1.88	1.36	1.41	1.22	0.79	1.53	1.4	174.5
IP_261693.1	NM_004104.4	FASN	0.88	0.29	0.15	0.46	-0.28	0.15	-0.16	794.5
IP_059465.1	NM_004431.3	EPHA2	0.77	0.28	0.11	0.35	-0.24	-0.09	1.25	284
IP_197375.1	NM_138732.2	NRXN2	0.44	1.02	0.49	1.03	0.79	0.95	1.05	303
IP_227796.1	XM_005267414.2	SNW1	1.49	2.08	2.4	1.83	2.35	2.19	2.42	193.5
IP_251156.1	XM_005256427.2	CHD3	1.1	1.07	0.82	1.21	3.51	0.44	0.97	740
IP_155284.1	NM_005273.3	GNB2	0.59	1.41	1.46	1.48	1.41	1.55	1.48	76
IP_060419.1	XM_006710474.1	KDM1A	1.4	1.07	0.95	1.33	0.93	1.25	1.75	127
IP_061118.1	NM_006015.4	ARID1A	1.55	1.52	1.62	1.28	1.22	1.1	1.57	844.5
IP_243911.1	NM_005880.3	DNAJA2	0.87	1.29	1.39	1.27	1.36	1.16	1.08	41.5
IP_194823.1	NM_001142930.1	API5	0.88	1.47	1.11	1.72	0.85	1.56	1.34	80.5
IP_298523.1	NM_001205019.1	GK	NA	NA	NA	NA	NA	NA	NA	NA
IP_184248.1	NM_021129.3	PPA1	1.08	1	1.24	1.29	1.15	0.97	0.87	37.5
IP_218595.1	XM_005266550.1	IFT88	1.22	1.27	1.29	1.2	1.24	1.25	1.54	221.5
IP_287116.1	NM_012384.3	GMEB2	1.11	0.1	0.5	-0.11	0.33	-0.36	0.31	124
IP_085011.1	NM_022437.2	ABCG8	0.64	0.56	0.92	0.27	1.3	1.12	0.61	155.5
IP_134943.1	NM_014244.4	ADAMTS2	0.29	0.45	0.78	0.35	0.74	0.12	0.34	238.5
IP_134951.1	NM_014244.4	ADAMTS2	0.84	0.42	0.27	0.36	0.53	0.44	0.06	180
IP_244770.1	XM_005256069.1	ZNF319	1.95	0.85	-0.06	0.18	1.2	1.4	-0.03	34.79
IP_266544.1	NM_001201465.1	NETO1	1.6	1.64	1.55	1.75	1.38	1.94	2.38	38
IP_266544.1	NM_001201465.1	NETO1	1.6	1.64	1.55	1.75	1.38	1.94	2.38	38
IP_300009.1	NM_006306.3	SMC1A	NA	NA	NA	NA	NA	NA	NA	NA
IP_133825.1	XM_005265950.1	TENM2	2.17	0.96	1.18	1.53	1.36	0.73	0.46	548
IP_085280.1	NM_001190274.1	FBXO11	2.47	2.28	2.02	2.06	2.33	2.15	2.09	342.5
IP_214352.1	NM_014840.2	NUAK1	1.55	1.19	0.72	0.63	0.61	1.37	0.84	94
IP_173638.1	NM_015250.3	BICD2	1.18	0.81	0.79	0.94	0.7	1.12	0.88	211.5
IP_087017.1	NM_000189.4	HK2	0.52	0.19	0.51	0.43	-0.04	0.11	0.28	207.5
IP_093503.1	NM_018897.2	DNAH7	0.44	0.39	-0.16	0.31	0.55	0.24	0.88	941
IP_105485.1	NM_006254.3	PRKCD	0.62	0.87	0.78	-0.11	1.31	1.16	0.9	NA
IP_112170.1	NM_003907.2	EIF2B5	0.85	1	1.1	1.2	1.34	0.97	0.94	105.5
IP_122222.1	NM_002940.2	ABCE1	2.44	1.84	2.08	1.68	1.74	2.13	1.8	217.5
IP_150303.1	XM_005249607.1	GLCCI1	2.31	1.28	1.48	1.38	1.45	1.46	1.27	95.5
IP_232024.1	NM_017553.2	INO80	2.22	1.58	1.75	1.47	2	1.31	1.2	226.5
IP_089719.1	NM_005270.4	GLI2	1.67	0.31	-0.01	0.04	0.3	0.02	0.45	322.5
IP_258925.1	NM_002805.5	PSMC5	0.22	1.13	1.06	1.29	1.28	1.1	1.13	80.5
IP_296132.1	XM_005261935.1	SBF1	-0.05	0.04	-0.33	0.68	0.32	-0.5	-0.49	321.5
IP_198238.1	XM_006718578.1	PC	0.23	0.69	0.58	0.77	0.58	0.77	0.76	326.5
IP_215827.1	NM_006861.6	RAB35	1.98	2.17	2.34	1.67	1.72	1.7	1.85	54
IP_253332.1	NM_014030.3	GIT1	0.37	0.42	0.34	0.35	0.32	0.57	-0.06	133.5
IP_253332.1	NM_014030.3	GIT1	0.37	0.42	0.34	0.35	0.32	0.57	-0.06	133.5
IP_075075.1	NM_031935.2	HMCN1	1.17	0.54	0.04	0.6	0.4	0.55	0.25	2.68
IP_121653.1	XM_006714304.1	FAT4	0.66	0.25	0.42	0.13	0.23	0.35	0.09	1,441.5
IP_123364.1	NM_012180.2	FBXO8	2.16	1.88	2.35	1.99	2.3	1.96	2	52.5
IP_226459.1	NM_001130005.1	ACTN1	1.33	1.89	1.92	2.24	1.78	1.28	2.15	140.5
IP_282388.1	NM_003818.3	CDS2	1.55	1	1.47	1.41	1.52	0.9	0.94	33.5
IP_293205.1	NM_012429.3	SEC14L2	1	0.98	0.93	1.39	1.07	1.13	1.08	169
IP_188730.1	NM_003054.4	SLC18A2	0.79	0.82	1.04	1.02	1.07	0.59	0.45	157.5
IP_186157.1	NM_004523.3	KIF11	1.43	0.85	0.69	1.22	1.01	1.15	0.83	422
IP_197256.1	NM_004470.3	FKBP2	1.68	0.78	0.87	0.56	0.68	0.49	0.87	14.45
IP_227323.1	NM_001933.4	DLST	0.91	1.31	1.67	1.24	0.7	1.21	0.81	153.5
IP_298352.1	NM_001415.3	EIF2S3	NA	NA	NA	NA	NA	NA	NA	NA
IP_094945.1	XM_005246377.1	ERBB4	1.02	1.12	1.5	1.03	1.11	0.84	1.3	365.5
IP_211226.1	NM_173595.3	ANKRD52	0.71	1.04	1.06	0.95	0.92	1.36	1.46	229
IP_092726.1	NM_003319.4	TTN	0.7	0.9	0.8	0.53	0.93	1.06	0.92	7,796.5
IP_095517.1	NM_025216.2	WNT10A	0.87	1.05	0.7	1.26	1.78	1.28	1.39	NA
IP_166166.1	NM_024915.3	GRHL2	1.11	1.23	1.5	1.35	1.28	1.25	1.2	22.24
IP_237981.1	NM_014918.4	CHSY1	1.08	0.82	0.59	0.91	1.36	1.11	0.86	116.5
IP_090816.1	NM_001171653.1	ZEB2	3.45	2.71	3.11	2.73	2.71	2.97	3.06	417
IP_117854.1	NM_175619.2	ZAR1	0.64	0.23	0.21	0.23	0.23	-0.07	0.29	144
IP_122005.1	NM_004362.2	CLGN	1.71	0.78	0.57	1.2	0.99	0.92	0.82	112.5
IP_130331.1	NM_001999.3	FBN2	1.21	0.31	0.32	0.31	0.64	0.22	0.69	258
IP_139573.1	NM_080679.2	COL11A2	-0.17	-0.08	0.38	-0.18	-0.15	-0.31	0.02	131.5
IP_139573.1	NM_080679.2	COL11A2	-0.17	-0.08	0.38	-0.18	-0.15	-0.31	0.02	131.5
IP_193960.1	NM_004211.3	SLC6A5	2.05	1.18	0.56	1.7	1.8	2.22	0.91	201
IP_224030.1	NM_001163484.1	DCAF11	1.17	1.12	1.27	1.14	1.44	1.09	1.13	74.5
IP_231033.1	NM_004667.5	HERC2	1.27	0.71	0.52	1.03	0.84	0.98	1.07	295
IP_298045.1	NM_000292.2	PHKA2	NA	NA	NA	NA	NA	NA	NA	NA
IP_197992.1	XM_005274097.2	PACS1	1.21	0.7	0.63	0.87	0.89	0.86	0.41	74.5
IP_082758.1	NM_016207.3	CPSF3	1.37	1.13	0.97	0.97	1.83	0.86	0.78	73.5
IP_122004.1	NM_004362.2	CLGN	0.88	0.84	0.94	0.71	0.7	0.75	1.05	33.5
IP_131071.1	NM_017415.2	KLHL3	1.12	0.93	0.68	0.95	0.9	0.95	1.22	143.5
IP_151176.1	NM_004067.2	CHN2	1.86	0.87	0.94	0.89	0.89	0.78	0.62	188
IP_183403.1	NM_138933.2	A1CF	0.71	0.73	0.32	0.64	0.43	0.88	0.57	100.5
IP_242581.1	XM_005255254.1	TNRC6A	2.16	2.44	2.43	1.96	2.48	2	2.46	435
IP_242581.1	XM_005255254.1	TNRC6A	2.16	2.44	2.43	1.96	2.48	2	2.46	435
IP_249967.1	NM_015113.3	ZZEF1	1.45	0.88	0.92	0.85	0.69	0.33	1.23	726
IP_298962.1	NM_001270458.1	MAOA	NA	NA	NA	NA	NA	NA	NA	NA
IP_097672.1	NM_005336.4	HDLBP	1.47	0.97	1.34	0.55	1.2	1.66	0.87	NA
IP_058966.1	NM_001286.3	CLCN6	1.97	1.11	1.27	0.88	0.61	0.95	0.79	376.5
IP_070160.1	NM_013353.2	TMOD4	0.6	0.71	0.78	0.73	0.82	0.57	1.13	61.5
IP_217118.1	NM_006231.3	POLE	0.44	0.91	0.99	0.87	0.7	0.68	0.88	281.5
IP_243168.1	NM_017458.3	MVP	0.78	0.46	1.14	0.33	0.71	0.04	-0.08	81
IP_251521.1	NM_153210.4	USP43	0.62	0.02	-0.15	-0.24	0.25	-0.03	-0.1	28.71
IP_088184.1	XM_005263912.1	TMEM131	2.14	1.15	1.11	1.02	1	1.13	0.99	812.5
IP_176400.1	NM_001006621.1	MAPKAP1	1.14	2.13	1.79	2.4	2.47	2.77	1.86	109
IP_186848.1	NM_018425.2	PI4K2A	1.49	1.18	1.05	1.98	2.16	0.47	1.04	51
IP_251077.1	XM_005256470.1	DNAH2	1.01	0.67	0.55	0.72	0.53	0.08	0.51	1.487
IP_263896.1	XM_005258152.2	SEH1L	1.64	1.88	2.18	1.7	2.54	1.97	2.01	144
IP_263896.1	XM_005258152.2	SEH1L	1.64	1.88	2.18	1.7	2.54	1.97	2.01	144
IP_302214.1	NM_207318.3	FAM199X	NA	NA	NA	NA	NA	NA	NA	NA
IP_094269.1	XM_006712177.1	ABI2	0.8	2.09	1.95	1.83	2.24	2.53	2.18	187.5
IP_094269.1	XM_006712177.1	ABI2	0.8	2.09	1.95	1.83	2.24	2.53	2.18	187.5
IP_120559.1	NM_001130692.1	PPP3CA	1.88	1.72	1.52	1.39	2.06	1.49	1.61	29.67
IP_142233.1	NM_001242830.1	ELOVL5	1.82	3.19	2.08	2.66	3.3	2.25	3.72	91.5
IP_171451.1	NM_007126.3	VCP	1.81	1.66	1.33	1.72	1.77	2.08	1.61	240
IP_216724.1	NM_001077261.3	NCOR2	2.23	0.44	0.08	0.28	0.79	0.15	-0.21	590
IP_083442.1	XM_005264105.1	ADCY3	0.59	0.8	0.86	0.74	1.03	1.29	0.98	353.5
IP_089930.1	NM_000122.1	ERCC3	1.08	0.86	0.23	0.74	1.06	0.32	1.45	292
IP_229209.1	NM_001376.4	DYNC1H1	1.48	1.09	0.83	0.22	1.49	0.66	0.82	349
IP_259262.1	NM_002737.2	PRKCA	1.65	1.09	0.3	1.22	1.18	1.12	1.28	278
IP_301395.1	NM_032121.5	MAGT1	NA	NA	NA	NA	NA	NA	NA	NA
IP_095632.1	NM_024085.4	ATG9A	1.35	1.22	1.81	1.92	1.78	1.65	0.71	NA
IP_106028.1	NM_183393.2	CADPS	1.49	1.67	2.45	1.66	1.32	1.48	2.44	340
IP_106704.1	NM_005233.5	EPHA3	2.31	1.16	0.9	1.39	1.21	0.86	0.97	438
IP_152997.1	NM_018264.3	TYW1	1.39	0.62	1.16	0.96	0.27	0.94	1.32	54.5
IP_171447.1	NM_007126.3	VCP	1.9	1.65	1.49	1.84	1.51	1.33	1.39	157.5
IP_200433.1	XM_006718829.1	GRM5	1.04	0.98	1.28	0.95	1.42	0.81	1.49	369.5
IP_213521.1	NM_003348.3	UBE2N	2.64	3.1	3.53	2.86	3.71	2.72	3.64	26.5
IP_273714.1	NM_001242597.1	TMEM147	1.7	1.07	1.55	1.05	0.6	1	1.53	25
IP_141684.1	NM_001253.3	CDC5L	2.51	1.43	1.39	1.8	1.18	1.51	1.02	351
IP_100143.1	NM_001099952.2	ITPR1	-0.1	0.74	0.69	0.72	0.54	1.12	0.9	NA
IP_177043.1	NM_001130438.2	SPTAN1	1.73	1.4	1.49	0.97	1.41	1.66	1.65	164.5
IP_177043.1	NM_001130438.2	SPTAN1	1.73	1.4	1.49	0.97	1.41	1.66	1.65	164.5
IP_078494.1	NM_003395.2	WNT9A	1.53	0.48	0.17	0.19	0.74	0.72	0.79	13.72
IP_187510.1	XM_005270262.1	LDB1	2.23	2.64	2.73	2.09	2.74	2.27	2.8	132.5
IP_266100.1	NM_005570.3	LMAN1	1.88	0.87	0.69	1.07	0.72	0.63	1.54	109.5
IP_269621.1	NM_016496.4	MARCH2	0.94	0.74	0.84	0.81	0.65	0.89	0.54	39.55
IP_300090.1	NM_031407.6	HUWE1	NA	NA	NA	NA	NA	NA	NA	NA
IP_167525.1	NM_001164623.1	AGO2	1.06	0.74	1.14	0.73	0.84	0.8	0.57	236.5
IP_284220.1	NM_015966.2	ERGIC3	1.62	1.15	1.31	1.14	1.1	1.32	1.25	24.26
IP_284220.1	NM_015966.2	ERGIC3	1.62	1.15	1.31	1.14	1.1	1.32	1.25	24.26
IP_217124.1	NM_006231.3	POLE	0.93	0.9	0.36	0.89	0.49	1.42	1.24	944.5
IP_085469.1	NM_003128.2	SPTBN1	1.58	1.24	0.79	1.13	0.99	0.64	1.14	21.49
IP_111523.1	NM_020949.2	SLC7A14	1.32	0.95	1.08	1.04	0.61	0.96	1.22	119
IP_058822.1	NM_004958.3	MTOR	1.4	1.44	1.31	1.84	1.03	1.36	1.42	1,089.5
IP_161978.1	NM_015024.4	XPO7	1.55	1.61	1.65	1.74	1.61	1.55	1.47	312.5
IP_075170.1	NM_000963.3	PTGS2	0.7	0.52	0.65	0.43	0.99	0.41	-0.24	159.5
IP_105535.1	NM_001128840.2	CACNA1D	1.83	1.44	0.87	1.13	2.02	1.13	0.78	NA
IP_105535.1	NM_001128840.2	CACNA1D	1.83	1.44	0.87	1.13	2.02	1.13	0.78	NA
IP_147184.1	NM_020823.1	TMEM181	1.24	0.6	0.77	0.84	1.11	0.39	0.45	78.5
IP_147184.1	NM_020823.1	TMEM181	1.24	0.6	0.77	0.84	1.11	0.39	0.45	78.5
IP_154772.1	NM_005720.3	ARPC1B	0.49	0.78	1.3	0.68	0.89	1.33	1.3	80.5
IP_260415.1	NM_015219.4	EXOC7	1.27	1.29	1.05	1.19	1.33	1.03	1.17	106
IP_260415.1	NM_015219.4	EXOC7	1.27	1.29	1.05	1.19	1.33	1.03	1.17	106
IP_260415.1	NM_015219.4	EXOC7	1.27	1.29	1.05	1.19	1.33	1.03	1.17	106
IP_260415.1	NM_015219.4	EXOC7	1.27	1.29	1.05	1.19	1.33	1.03	1.17	106
IP_260415.1	NM_015219.4	EXOC7	1.27	1.29	1.05	1.19	1.33	1.03	1.17	106
IP_304774.1	NM_001256120.1	NAA10	NA	NA	NA	NA	NA	NA	NA	NA
IP_122219.1	NM_002940.2	ABCE1	1.95	1.87	2.47	1.38	2.15	1.9	1.56	71
IP_215410.1	NM_022363.2	LHX5	1.11	1.1	1.17	0.5	0.62	0.87	1.06	114.5
IP_276297.1	NM_007056.2	CLASRP	0.9	0.38	0.41	-0.65	-0.3	-0.17	0.9	290.5
IP_274957.1	NM_006503.3	PSMC4	0.54	1.1	1.77	1.17	1.7	1.05	0.71	24.6
IP_086112.1	NM_138964.2	PROKR1	0.98	0.4	0.61	0.34	0.59	-0.02	0.51	133.5
IP_106034.1	NM_003716.3	CADPS	2.31	1.77	1.09	1.64	2.05	1.06	2.13	29
IP_058470.1	NM_001428.3	ENO1	0.94	1.66	0.88	2.12	1.2	1.64	1.79	84
IP_111206.1	XM_006713507.1	PPM1L	1.9	2.23	1.79	2.8	3.23	1.46	2.3	17
IP_170224.1	NM_000170.2	GLDC	1.13	1.13	1.36	1.27	1.12	0.81	1.09	125.5
IP_222269.1	XM_005266206.1	CDC16	1.36	1.34	1.35	1.97	1.29	0.95	1.29	53
IP_270876.1	NM_001136195.1	TNPO2	0.39	0.68	0.94	1.35	0.63	0.73	-0.25	152
IP_127754.1	NM_033228.2	TRIM23	1.52	1.51	1.51	1.65	1.49	1.64	1.83	106
IP_147546.1	NM_001130690.2	PDE10A	1.8	1.32	1.39	1.3	1.23	1.79	1.48	193.5
IP_236253.1	NM_001166694.1	CHRNA3	0.34	0.97	0.21	1.05	0.21	0.4	0.81	120
IP_079641.1	NM_181690.2	AKT3	3.05	2.1	2.46	2.59	1.77	2.09	2.55	19.82
IP_259051.1	NM_001288732.1	TEX2	1.96	1.09	1.37	1.25	1.13	0.94	1.24	507
IP_259051.1	NM_001288732.1	TEX2	1.96	1.09	1.37	1.25	1.13	0.94	1.24	507
IP_261680.1	NM_022156.4	DUS1L	0.63	0.7	0.32	1.15	0.64	0.7	0.53	160
IP_091509.1	NM_006593.2	TBR1	2.3	2.05	1.36	1.64	1.43	1.44	1.45	186
IP_122400.1	XM_005263014.1	NR3C2	2.3	1.26	1.09	1.09	1.16	1.25	1.1	135
IP_237718.1	NM_001145155.1	NR2F2	2.38	3.17	2.6	3.5	3.57	2.79	2.7	80.5
IP_129246.1	NM_000439.4	PCSK1	0.93	1.04	1.03	0.89	0.85	1.51	0.95	37.67
IP_189430.1	NM_001202438.1	EDRF1	1.61	0.56	1.08	0.68	0.56	0.69	0.76	300.5
IP_083770.1	NM_021831.5	AGBL5	1.43	1.11	1.15	0.64	0.97	1.27	0.89	344
IP_239150.1	XM_006720920.1	RHBDF1	1.6	0.99	1.26	0.01	1.93	0.44	0.92	177
IP_239150.1	XM_006720920.1	RHBDF1	1.6	0.99	1.26	0.01	1.93	0.44	0.92	177
IP_295610.1	NM_001009880.1	KIAA0930	1.57	1.51	0.79	1.21	2.18	1.71	1.88	136.5
IP_140089.1	NM_003214.3	TEAD3	1.11	1.44	1.68	2.02	1.2	1.54	1.26	20.09
IP_150087.1	NM_015622.5	CCZ1	1.43	1.32	1.14	1.24	1.27	1.31	1.6	159.5
IP_166140.1	XM_005250861.1	PABPC1	2.71	2.05	1.3	2.07	2.61	1.4	2.12	181.5
IP_196807.1	XM_005273877.2	EML3	0.97	0.56	0.15	0.42	2.49	0.29	-0.15	278
IP_225755.1	XM_006720166.1	DACT1	0.25	0.21	0.32	0.23	0.03	0.13	0.37	267
IP_244586.1	NM_012106.3	ARL2BP	1.57	1.01	1.47	0.87	1.03	1.33	1.04	37.5
IP_259222.1	XM_005257719.2	AXIN2	3.34	0.84	0.87	0.86	0.21	0.12	0.59	268.5
IP_261455.1	NM_017921.2	NPLOC4	1.06	0.97	1.24	1.37	1.09	1.11	1.21	34.4
IP_304912.1	NM_006013.3	RPL10	NA	NA	NA	NA	NA	NA	NA	NA
IP_186207.1	XM_005269694.2	MYOF	1.13	0.83	1.01	0.41	0.43	1.17	1.04	37
IP_224413.1	XM_005267503.2	HECTD1	1.65	1.81	2.23	1.93	1.76	1.73	1.87	715.5
IP_255094.1	NM_001067.3	TOP2A	1.5	0.96	0.88	1.41	1.34	0.71	0.91	261.5
IP_257375.1	NM_014897.2	ZNF652	1.8	1.4	1.47	1.51	1.44	1.33	1.31	56
IP_059009.1	NM_014874.3	MFN2	0.97	0.96	1.02	0.79	1.45	1.2	1.02	312.5
IP_150016.1	NM_001080495.2	TNRC18	0.31	0.4	-0.03	1.11	0.24	-0.06	0.53	708.5
IP_152957.1	NM_153033.4	KCTD7	0.65	1.24	0.92	1.19	1.52	1.03	1.25	91
IP_229203.1	NM_001376.4	DYNC1H1	1.25	1.09	1.23	1.22	1.09	0.54	0.51	357
IP_062522.1	NM_012199.2	AGO1	1.87	1.5	1.55	1.31	1.36	1.38	1.25	56
IP_284218.1	NM_198398.1	ERGIC3	1.63	1.15	1.36	1.07	1.26	1.25	1.18	25.51
IP_284218.1	NM_198398.1	ERGIC3	1.63	1.15	1.36	1.07	1.26	1.25	1.18	25.51
IP_108791.1	NM_021964.2	ZNF148	3.24	1.65	1.34	2.07	1.38	1.19	1.41	192
IP_147245.1	NM_031924.4	RSPH3	1.31	-0.13	0.02	-0.35	0.32	-0.2	-0.06	11.9
IP_171622.1	NM_006289.3	TLN1	1.54	0.65	0.51	0.66	0.6	0.78	0.41	1,200.5
IP_207853.1	NM_152989.3	SOX5	3.05	2.18	1.62	2.7	3.02	2.61	1.89	190.5
IP_266728.1	XM_006722541.1	ZNF236	1.02	0.4	0.71	0.26	0.33	0.41	0.23	781.5
IP_284739.1	NM_003286.2	TOP1	1.12	1.79	2.16	1.59	2.77	2.25	1.85	124
IP_064802.1	NM_032864.3	PRPF38A	0.94	1.07	1.26	0.59	1.03	1.33	1.16	130
IP_082737.1	NM_003887.2	ASAP2	0.68	0.75	1.11	0.83	0.6	1.16	1.07	223.5
IP_249474.1	NM_006445.3	PRPF8	1.7	1.69	1.18	2.04	1.74	1.38	2.22	213
IP_253248.1	NM_005208.4	CRYBA1	2	1.77	1.97	1.71	1.74	1.38	2.21	14
IP_151474.1	XM_005249769.1	PDE1C	1.15	0.81	0.67	0.67	1.03	1.11	0.59	282.5
IP_294715.1	NM_019008.4	MIEF1	0.75	1.32	2.03	1.33	1.91	1.2	1.4	195.5
IP_294288.1	XM_006724260.1	EIF3L	2	1.35	1.07	1.66	1.18	1.43	2.19	145.5
IP_115709.1	XM_006713932.1	FAM193A	2.14	0.76	0.35	-0.15	0.88	0.11	0.81	698
IP_265581.1	NM_005359.5	SMAD4	1.18	1.27	1.23	1.81	0.87	0.84	1.27	191.5
IP_271099.1	XM_005260086.2	CCDC130	1.46	0.43	0.07	0.51	0.54	0.23	-0.04	145
IP_063766.1	XM_006710795.1	PTPRF	1.84	0.7	0.3	0.24	-0.87	1.33	0.68	799
IP_063766.1	XM_006710795.1	PTPRF	1.84	0.7	0.3	0.24	-0.87	1.33	0.68	799
IP_066873.1	NM_032270.4	LRRC8C	0.71	0.78	0.78	0.67	0.96	0.54	0.41	350
IP_121399.1	NM_001083.3	PDE5A	1.62	1.16	1.53	0.83	1.64	1.38	1.12	175.5
IP_232276.1	NM_015289.2	VPS39	2.04	1.28	1.26	2.07	1.46	0.88	1.19	92
IP_250171.1	NM_153827.4	MINK1	0.75	0.85	0.87	1.02	0.88	0.71	0.79	556
IP_250171.1	NM_153827.4	MINK1	0.75	0.85	0.87	1.02	0.88	0.71	0.79	556
IP_263244.1	NM_005131.2	THOC1	1.88	1.51	1.45	1.18	1.81	1.51	1.73	207.5
IP_261487.1	NM_004712.4	HGS	1.29	0.8	0.68	0.72	1.07	0.81	1.18	69.5
IP_299014.1	NM_021140.2	KDM6A	NA	NA	NA	NA	NA	NA	NA	NA
IP_299014.1	NM_021140.2	KDM6A	NA	NA	NA	NA	NA	NA	NA	NA
IP_229440.1	NM_001969.4	EIF5	4	2.2	1.78	1.92	1.5	1.53	1.65	124
IP_210022.1	XM_006719556.1	SCN8A	2.69	1.22	1.22	0.82	1.44	1.09	2.04	748.5
IP_243903.1	NM_133443.2	GPT2	1.39	0.54	0.6	0.55	0.48	0.78	0.11	64.5
IP_107522.1	NM_022488.4	ATG3	1.66	1.88	2.29	1.13	1.75	2.47	1.89	49.5
IP_128933.1	NM_001278642.1	EDIL3	1.17	1.23	0.94	1.29	0.86	1.19	1.16	183
IP_163993.1	NM_001081640.1	PRKDC	0.8	0.65	0.79	0.75	0.29	0.65	0.76	735.5
IP_167171.1	XM_006716501.1	ADCY8	0.97	1.19	1.25	1.16	1.62	1.07	0.72	382
IP_199820.1	XM_006718561.1	MYO7A	0.75	0.83	1.06	1.23	0.56	1.2	1.07	65
IP_209309.1	XM_006719391.1	ARF3	1.42	0.55	0.49	0.74	0.37	0.36	0.54	9.27
IP_239306.1	XM_006720934.1	CAPN15	0.76	0.35	-0.05	0.02	0.3	0.08	0.73	240.5
IP_265441.1	NM_001080467.2	MYO5B	0.84	0.63	0.67	0.83	1	0.66	0.51	717.5
IP_301210.1	NM_001039840.2	CHIC1	NA	NA	NA	NA	NA	NA	NA	NA
IP_284410.1	NM_022477.3	NDRG3	1.22	1.32	1.35	1.56	1.09	1.49	1.49	100
IP_275516.1	XM_006723170.1	GRIK5	1.46	1.22	1.14	1.41	0.72	1.32	1.42	75
IP_130727.1	XM_006714678.1	TCF7	2.61	1.09	1.24	1.02	0.78	1.12	1.11	156.5
IP_130727.1	XM_006714678.1	TCF7	2.61	1.09	1.24	1.02	0.78	1.12	1.11	156.5
IP_235721.1	NM_004383.2	CSK	1.24	0.94	1.09	1.11	1.04	0.93	0.24	64.5
IP_251420.1	XM_005256652.2	MYH10	0.47	0.54	0.5	0.2	0.58	0.31	0.24	762
IP_197672.1	NM_006268.4	DPF2	1.27	0.68	1.3	0.19	0.89	1.42	0.94	161
IP_197672.1	NM_006268.4	DPF2	1.27	0.68	1.3	0.19	0.89	1.42	0.94	161
IP_184094.1	NM_001282959.1	CCAR1	5.09	1.56	1.59	1.51	1.95	1.78	2.07	23.07
IP_092326.1	NM_001011708.1	OLA1	3.2	3.01	2.75	2.37	3.24	2.75	3.35	53
IP_244925.1	NM_001265612.1	CNOT1	2.82	2.15	2.7	2.34	2.21	2.12	1.71	684
IP_247833.1	NM_014427.4	CPNE7	0.41	0.26	-0.04	0.55	0.41	-0.04	0.52	153
IP_293465.1	NM_005569.3	LIMK2	0.8	0.95	0.94	1.27	0.88	0.63	0.85	221
IP_304913.1	NM_006013.3	RPL10	NA	NA	NA	NA	NA	NA	NA	NA
IP_186631.1	NM_020123.3	TM9SF3	3.34	2.2	1.74	1.79	2.6	2.52	2.4	241.5
IP_260265.1	NM_000213.3	ITGB4	0.02	0.48	0.65	0.48	0.77	0.62	0.1	666
IP_074146.1	XM_005245681.1	RABGAP1L	1	1.41	1.44	1.52	1.37	1.07	1.61	54
IP_161296.1	XM_006716263.1	TNKS	1.01	0.83	1.02	0.45	0.96	0.67	0.87	168.5
IP_259985.1	XM_005257226.1	HID1	1.68	1.04	1.13	0.58	1.39	0.55	1.14	348
IP_215209.1	NM_002834.3	PTPN11	1.18	0.96	1	1.13	0.82	1.62	0.59	241
IP_059799.1	NM_020765.2	UBR4	1.36	1.22	1.22	1.2	1.41	1.07	1.07	1,108.5
IP_073340.1	XM_005245228.1	PBX1	4.11	1.87	1.49	1.89	1.81	2.02	1.71	195.5
IP_073340.1	XM_005245228.1	PBX1	4.11	1.87	1.49	1.89	1.81	2.02	1.71	195.5
IP_093213.1	NM_001252668.1	GULP1	2.08	1.77	1.55	1.47	2.55	1.61	1.85	26
IP_093213.1	NM_001252668.1	GULP1	2.08	1.77	1.55	1.47	2.55	1.61	1.85	26
IP_138773.1	XM_006715188.1	DDR1	1.05	0.54	0.86	-0.48	0.48	0.58	0.34	353.5
IP_203797.1	NM_001642.2	APLP2	0.98	1.2	0.39	0.9	0.35	0.68	0.86	10.57
IP_246069.1	NM_017990.3	PDPR	1.56	1.09	0.96	0.96	1.67	1.03	1.96	130
IP_249485.1	NM_006445.3	PRPF8	1.75	1.69	1.67	1.82	2.25	1.33	1.35	436
IP_264593.1	NM_020805.1	KLHL14	1.47	2.14	2.39	2.61	2.34	2.22	1.59	259.5
IP_301414.1	NM_000052.6	ATP7A	NA	NA	NA	NA	NA	NA	NA	NA
IP_259918.1	NM_000835.4	GRIN2C	1.37	0.89	0.85	0.78	0.82	1.06	0.98	131.5
IP_214656.1	NM_018711.2	SVOP	1.77	1.06	1.26	0.97	1.23	1.17	0.91	198.5
IP_249433.1	NM_006224.3	PITPNA	1.61	1.82	1.98	1.14	1.29	1.69	1.51	72.5
IP_088790.1	XM_005263901.2	FHL2	1.45	0.44	0.06	0.53	0.3	0.26	0.15	56.82
IP_070353.1	XM_005244858.2	CELF3	1.89	0.92	1.47	1.61	0.66	1.02	1.1	154.5
IP_154716.1	NM_001244580.1	TRRAP	0.7	1.05	1.32	1.49	1.59	1.47	0.54	1.299
IP_227837.1	XM_005268218.1	NRXN3	1.99	1.72	1.93	2.42	2.08	2.03	2.53	556
IP_227837.1	XM_005268218.1	NRXN3	1.99	1.72	1.93	2.42	2.08	2.03	2.53	556
IP_249487.1	NM_006445.3	PRPF8	1.56	1.7	1.53	1.57	1.7	1.76	1.31	845.5
IP_282036.1	NM_139321.2	ATRN	0.54	1.16	1.05	0.84	0.89	1.59	0.36	406
IP_155512.1	NM_001913.4	CUX1	2.66	1.53	1.05	1.82	1.37	0.82	1.52	306.5
IP_175672.1	NM_014618.2	BRINP1	5.29	1.79	1.53	1.94	1.76	1.44	2.33	324.5
IP_246336.1	NM_000353.2	TAT	1.48	0.88	0.61	0.65	0.41	0.98	1.32	51
IP_074854.1	NM_015039.3	NMNAT2	2.04	1.6	1.68	1.67	0.71	1.75	1.02	73.5
IP_185128.1	NM_001271518.1	KCNMA1	3.34	2.72	2.42	2.39	3.48	2.85	2.16	262.5
IP_185128.1	NM_001271518.1	KCNMA1	3.34	2.72	2.42	2.39	3.48	2.85	2.16	262.5
IP_086539.1	XM_005264223.1	EXOC6B	1.13	1.16	0.28	1.36	0.68	0.84	1.34	348
IP_086539.1	XM_005264223.1	EXOC6B	1.13	1.16	0.28	1.36	0.68	0.84	1.34	348
IP_149997.1	XM_006715667.1	SLC29A4	1.02	0.95	0.45	1.61	0.92	0.98	0.99	180.5
IP_283992.1	NM_001161766.1	AHCY	1.59	1.34	0.75	1.38	1.55	1.21	1.52	123.5
IP_218760.1	NM_005932.3	MIPEP	1.16	0.67	0.89	0.49	0.23	0.91	0.39	294
IP_263888.1	NM_031216.3	SEH1L	1.96	1.55	1.33	2.22	1.84	1.94	2.06	141.5
IP_263888.1	NM_031216.3	SEH1L	1.96	1.55	1.33	2.22	1.84	1.94	2.06	141.5
IP_194560.1	NM_001752.3	CAT	0.98	0.74	0.95	0.77	0.5	0.73	0.89	171
IP_209446.1	NM_006009.3	TUBA1A	0.97	1.55	1.93	1.93	1.44	1.6	1.62	97.5
IP_157351.1	NM_020911.1	PLXNA4	1.21	0.89	0.82	0.42	0.33	0.37	0.57	771.5
IP_158918.1	NM_031946.5	AGAP3	0.81	0.82	0.95	0.91	1.09	1.28	1.1	238
IP_215443.1	NM_005996.3	TBX3	2.14	0.96	0.08	1.08	0.65	1.97	0.67	179
IP_265436.1	NM_001080467.2	MYO5B	0.88	0.64	0.66	0.14	1.02	0.68	0.62	501.5
IP_284955.1	NM_001098797.1	TOX2	1.34	1.19	1.29	1.09	1	1.03	1.25	22.89
IP_193504.1	NM_033326.3	SOX6	3.38	2.66	2.81	2.65	3.01	2.61	2.5	166
IP_061199.1	NM_001276252.1	WDTC1	1.55	1.28	1.46	0.88	1.32	1.28	1.71	272.5
IP_268726.1	NM_005483.2	CHAF1A	0.33	0.11	-0.29	0.31	0	-0.47	0.3	142
IP_133904.1	NM_003062.3	SLIT3	1.95	0.84	0.75	1.39	0.72	0.69	1.09	551
IP_137271.1	NM_002114.2	HIVEP1	1.74	0.13	0.35	0.05	1.09	-0.18	0.4	725
IP_214351.1	NM_014840.2	NUAK1	3.16	1.13	1.56	1.49	0.64	1.5	1.52	220
IP_233142.1	NM_004236.3	COPS2	2.9	2.83	2.96	2.96	2.92	2.69	2.43	198
IP_251714.1	NM_001372.3	DNAH9	0.68	0.44	0.58	0.75	0.77	0.51	0.33	422.5
IP_091018.1	NM_004543.4	NEB	-0.27	0.73	0.37	1.55	0.6	0.38	0.85	302.5
IP_189633.1	NM_001005463.2	EBF3	2.54	2.41	2.24	2.45	2.18	2.34	2.28	52
IP_203973.1	XM_006718795.1	IGSF9B	2.03	1.56	1.5	0.92	1.14	1.24	1.45	405
IP_210128.1	NM_021934.4	C12orf44	1.01	1.61	1.26	1.71	1.51	1.62	1.57	23.75
IP_243275.1	XM_005255421.1	PPP4C	0.08	0.21	-0.02	0.3	-0.03	0.33	0.43	15.77
IP_246116.1	NM_001605.2	AARS	1.36	0.84	0.46	0.62	0.83	1.13	0.49	370
IP_171312.1	NM_001184945.1	FAM219A	1.64	2.64	2.9	2.95	3.09	2.05	1.82	18.71
IP_234926.1	NM_016166.1	PIAS1	1.59	1.37	2.06	1.48	0.72	1.92	0.27	54
IP_147160.1	XM_005267057.1	TULP4	1.25	0.74	0.77	0.38	0.65	0.23	0.7	743.5
IP_074364.1	NM_014864.3	FAM20B	1.21	1.22	0.98	1.32	0.96	1.01	0.88	108.5
IP_076359.1	XM_005245257.1	PIK3C2B	1.9	0.88	0.91	0.63	0.69	0.49	0.77	369
IP_109669.1	NM_001278683.1	AMOTL2	0.52	0.18	-0.02	0.31	0.61	0.71	0.42	246
IP_157086.1	NM_015328.3	AHCYL2	1.01	1.17	0.98	0.63	0.78	1.12	0.51	261.5
IP_193172.1	NM_001042559.2	EIF4G2	3.98	3.19	5.99	2.71	2.98	2.78	2.99	285.5
IP_195289.1	NM_014756.3	CKAP5	1.03	1.26	1.35	0.94	1.19	0.95	1.3	606.5
IP_257572.1	XM_005257059.2	COL1A1	2.06	1.08	1.23	0.76	1.05	1.06	0.71	422
IP_297659.1	NM_001001994.1	GPM6B	NA	NA	NA	NA	NA	NA	NA	NA
IP_297659.1	NM_001001994.1	GPM6B	NA	NA	NA	NA	NA	NA	NA	NA
IP_142627.1	XM_006715534.1	BAI3	6.05	2.38	2.05	2.34	2.83	1.74	2.16	445.5
IP_158790.1	XM_006715977.1	KCNH2	1.48	0.67	1.06	1.17	1	0.96	0.96	168
IP_066450.1	NM_002731.2	PRKACB	1.3	2.18	1.39	1.98	2.41	2.77	2.32	77
IP_066450.1	NM_002731.2	PRKACB	1.3	2.18	1.39	1.98	2.41	2.77	2.32	77
IP_145343.1	XM_006715537.1	PTPRK	2.61	1.15	0.93	1.19	1.36	1.11	1.64	233
IP_185144.1	XM_005269781.1	KCNMA1	3.36	2.87	2.16	2.95	3.27	2.93	2.37	147.5
IP_185144.1	XM_005269781.1	KCNMA1	3.36	2.87	2.16	2.95	3.27	2.93	2.37	147.5
IP_085349.1	NM_004801.4	NRXN1	0.99	1.68	1.6	1.6	1.63	1.62	1.48	119.5
IP_085349.1	NM_004801.4	NRXN1	0.99	1.68	1.6	1.6	1.63	1.62	1.48	119.5
IP_253572.1	XM_006721923.1	NF1	1.66	1.54	1.41	1.7	1.43	1.63	1.94	106.5
IP_171492.1	XM_006716716.1	UNC13B	1.22	0.94	0.83	0.98	0.67	0.6	0.74	698.5
IP_116181.1	NM_014743.2	KIAA0232	2.74	1.16	1.6	1.04	0.95	0.6	0.99	617.5
IP_149842.1	NM_032415.5	CARD11	0.95	0.74	0.46	0.64	0.83	0.9	1.05	244
IP_261161.1	NM_014740.3	EIF4A3	0.91	0.81	1.28	0.84	1.08	1.12	0.68	152
IP_276360.1	NM_031417.3	MARK4	0.7	0.76	0.81	0.34	0.65	1.29	0.73	104
IP_235350.1	XM_006720460.1	ARIH1	3.15	2.8	2.49	2.81	2.52	3.14	2.72	114
IP_211720.1	NM_004990.3	MARS	1.86	0.85	0.28	0.59	1.58	0.89	0.77	87.5
IP_242379.1	NM_020718.3	USP31	0.88	0.73	0.5	0.73	0.67	0.54	0.83	444
IP_255401.1	NM_021991.2	JUP	1.35	0.45	0.5	0.44	0.31	0.84	0.19	98.5
IP_082729.1	NM_003887.2	ASAP2	0.79	0.74	0.25	0.8	1.21	0.79	0.53	40
IP_113136.1	NM_005781.4	TNK2	1.92	0.69	0.24	0.49	0.55	0.99	1.41	474
IP_283785.1	NM_006892.3	DNMT3B	1.32	0.3	-0.1	0.67	-0.5	0.4	-0.68	392
IP_090530.1	NM_058241.2	CCNT2	3.95	2.07	1.76	2.69	1.68	1.61	1.18	180
IP_090530.1	NM_058241.2	CCNT2	3.95	2.07	1.76	2.69	1.68	1.61	1.18	180
IP_203135.1	XM_006718892.1	GRAMD1B	2.65	1	0.9	0.9	1.78	1.47	0.47	234.5
IP_289679.1	XM_006723975.1	DSCAM	0.77	0.88	0.82	0.56	1.41	0.55	1.29	97.5
IP_058475.1	XM_006710433.1	ENO1	0.97	1.51	1.85	1.83	1.44	1.72	2.1	190.5
IP_142863.1	NM_001402.5	EEF1A1	1.44	1.69	1.38	1.42	1.43	1.76	1.4	94
IP_207779.1	NM_003034.3	ST8SIA1	0.86	1.21	0.94	0.69	1.21	1.03	1.12	143
IP_207779.1	NM_003034.3	ST8SIA1	0.86	1.21	0.94	0.69	1.21	1.03	1.12	143
IP_110112.1	NM_022131.2	CLSTN2	-0.16	0.15	0.73	0.23	0.41	0.4	-0.02	281
IP_133491.1	NM_001037333.1	CYFIP2	1.52	1.51	1.02	1.08	1.32	1.39	1.74	589
IP_215151.1	NM_024953.3	NAA25	3.39	1.41	1.26	1.37	1.56	1.77	1.64	93
IP_216315.1	XM_006719552.1	CLIP1	2.82	0.63	0.33	0.8	0.94	0.43	0.37	272
IP_243209.1	NM_004783.3	TAOK2	1.77	1.6	1.28	1.1	1.85	1.17	1.14	471
IP_127566.1	XM_006714695.1	ELOVL7	2.2	1.12	1.02	0.8	0.98	1.6	1.3	20.5
IP_084445.1	XM_005264315.1	LTBP1	0.56	0.82	0.25	1.01	1.08	0.48	0.65	422.5
IP_194978.1	NM_001256695.1	PRDM11	2.4	0.93	0.97	0.9	0.9	1.28	0.68	33
IP_249644.1	NM_014853.2	SGSM2	1.88	0.94	1.68	0.56	0.99	1.39	1.68	436
IP_211431.1	NM_001686.3	ATP5B	1.43	0.77	1.09	0.43	0.81	0.65	0.26	68.5
IP_089932.1	NM_000122.1	ERCC3	2.04	0.8	0.88	1.02	0.21	0.83	0.59	25
IP_210452.1	NM_001243730.1	RARG	1.52	0.78	0.94	1.11	0.67	1.22	1.27	148
IP_194405.1	NM_001326.2	CSTF3	4.63	1.76	1.71	2.23	1.45	1.79	1.34	285.5
IP_195134.1	NM_001101802.1	PHF21A	2.75	2.49	2.2	2.29	2.38	2.82	2.44	197
IP_195134.1	NM_001101802.1	PHF21A	2.75	2.49	2.2	2.29	2.38	2.82	2.44	197
IP_294646.1	NM_000967.3	RPL3	2.79	1.45	1.37	1.72	1.14	1.99	2.21	69.5
IP_174788.1	NM_019114.4	EPB41L4B	1.41	1.07	1.38	0.95	1.33	0.64	1.07	325.5
IP_176414.1	NM_006195.5	PBX3	5.64	2.91	2.72	2.81	3	2.81	3.03	162
IP_265139.1	NM_001001937.1	ATP5A1	1.87	1.55	1.38	1.18	1.76	1.27	1.5	56
IP_253224.1	NM_203318.1	MYO18A	1.32	0.7	1.16	0.41	0.09	1.04	0.74	537.5
IP_235113.1	XM_005254633.1	TLE3	0.81	0.27	1.05	0.2	0.22	0.72	-0.17	277
IP_084791.1	NM_003618.3	MAP4K3	3.16	1.33	1.55	1.6	1.1	1.18	1.48	78
IP_092654.1	NM_003319.4	TTN	1	0.9	1.22	1.36	0.86	1.21	0.65	3,947.5
IP_108168.1	NM_007085.4	FSTL1	1.47	1.44	1.58	1.28	1.51	1.75	1.74	86
IP_199322.1	NM_198896.1	RAB6A	3.27	2.44	2.21	3.24	2.57	3.05	3.72	8.15
IP_199322.1	NM_198896.1	RAB6A	3.27	2.44	2.21	3.24	2.57	3.05	3.72	8.15
IP_211758.1	NM_004984.2	KIF5A	1.99	0.26	0.57	-0.41	0.36	0.66	0.07	308.5
IP_217141.1	NM_001170543.1	PGAM5	0.87	0.51	0.95	0.27	0.64	0.59	0.33	93.5
IP_228323.1	NM_001284280.1	SMEK1	1.92	1.67	1.82	2.15	1.44	1.69	1.53	306.5
IP_246504.1	NM_014003.3	DHX38	1.29	1.1	1.05	0.65	1.88	1.49	1.06	226
IP_249483.1	NM_006445.3	PRPF8	2.19	1.69	1.55	1.58	1.79	2	1.93	1.106
IP_075673.1	XM_005245478.1	CACNA1S	1.63	0.73	0.34	0.67	0.85	0.57	0.6	117
IP_135274.1	NM_006098.4	GNB2L1	2	1.48	1.54	1.42	1.57	1.26	1.52	10.85
IP_079667.1	NM_001278196.1	ZBTB18	3.3	2.88	3.65	3.16	3.03	3.08	3.29	212
IP_268386.1	XM_006722832.1	CELF5	2.06	1.05	0.93	1.15	1.32	1.13	0.85	30
IP_121839.1	NM_032961.1	PCDH10	1.81	1.01	0.97	1.27	0.92	0.63	0.74	474.5
IP_249477.1	NM_006445.3	PRPF8	1.7	1.69	1.63	1.49	1.75	2.02	1.97	1.036
IP_296051.1	NM_002751.5	MAPK11	0.33	0.35	0.33	0.85	0.49	0.43	0.85	24.52
IP_266183.1	XM_005266730.1	KIAA1468	4.38	1.63	1.29	2.43	2.14	1.41	1.78	400
IP_303424.1	NM_004794.2	RAB33A	NA	NA	NA	NA	NA	NA	NA	NA
IP_295547.1	NM_001017528.2	PRR5	0.93	0.39	1.35	0.14	-0.3	1.19	-0.54	67
IP_196917.1	NM_002696.2	POLR2G	0.97	0.88	0.94	0.73	0.98	0.76	0.58	23.58
IP_250928.1	NM_000937.4	POLR2A	1.67	0.75	0.54	0.96	0.14	1.18	0	299
IP_133497.1	NM_001037333.1	CYFIP2	3.03	1.45	2.02	1.75	1.83	1.42	1.24	279.5
IP_178100.1	XM_005272213.1	VAV2	0.57	1.1	0.9	1.14	0.74	1.24	0.71	292
IP_129062.1	NM_020801.2	ARRDC3	2.9	2.28	2.47	2.14	2.04	1.8	2.39	91.5
IP_299005.1	NM_021140.2	KDM6A	NA	NA	NA	NA	NA	NA	NA	NA
IP_299005.1	NM_021140.2	KDM6A	NA	NA	NA	NA	NA	NA	NA	NA
IP_087913.1	NM_014014.4	SNRNP200	0.95	0.94	0.69	0.82	0.61	0.97	0.61	344.5
IP_246197.1	NM_012426.4	SF3B3	1.37	1.23	1.15	0.99	1.3	1.01	1.25	225
IP_119795.1	XM_006714267.1	MAPK10	2.11	2.11	3.51	1.85	1.32	1.34	1.35	134
IP_087912.1	NM_014014.4	SNRNP200	0.82	0.94	0.66	1.03	1.17	0.9	-0.39	784
IP_191948.1	NM_000218.2	KCNQ1	0.62	0.39	0.66	0.33	0.1	0.88	0.14	225
IP_177640.1	NM_013318.3	PRRC2B	5.27	0.75	1.09	0.53	0.87	0.65	0.74	959
IP_193171.1	NM_001042559.2	EIF4G2	4.29	3.11	4.99	2.63	2.5	5.27	2.85	220
IP_198288.1	XM_006718479.1	KDM2A	1.78	1.27	1.07	0.8	1.54	1.45	1.37	338.5
IP_121799.1	NM_199320.3	JADE1	1.08	1.22	1.06	1.24	0.72	1.25	1.11	188.5
IP_171054.1	NM_018225.2	SMU1	1.65	1.16	1.07	1.34	1.42	0.82	0.87	18.93
IP_210447.1	NM_001243731.1	RARG	0.28	1.01	0.97	0.75	0.71	1.09	0.81	43
IP_255130.1	NM_003079.4	SMARCE1	4.34	1.03	1.24	0.6	0.88	0.93	1.25	167.5
IP_058466.1	NM_001428.3	ENO1	1.28	1.57	1.74	1.35	1.35	1.71	1.91	9.94
IP_203118.1	NM_153201.3	HSPA8	1.01	0.84	1.4	0.38	1.06	0.5	0.73	141
IP_273190.1	NM_001172774.1	DPY19L3	1.63	0.97	1.03	0.77	1.5	0.88	1.06	268
IP_118004.1	NM_022832.3	USP46	2.58	1.59	1.6	0.99	1.35	1.43	1.4	137.5
IP_157180.1	NM_014997.3	KLHDC10	1.51	1.66	2	2.08	1.5	1.71	2.17	15.52
IP_157180.1	NM_014997.3	KLHDC10	1.51	1.66	2	2.08	1.5	1.71	2.17	15.52
IP_197199.1	NM_001282652.1	STIP1	0.7	0.72	1.24	0.85	0.87	0.4	0.09	167.5
IP_206231.1	XM_006718962.1	CHD4	1.43	1.21	1	1.71	1.02	1.7	1.79	143
IP_058361.1	NM_015215.3	CAMTA1	2.24	1.72	3.4	0.91	1.13	0.82	1.44	595
IP_060874.1	NM_020451.2	SEPN1	3.15	0.73	0.54	1.12	0.84	1.14	0.21	178.5
IP_186269.1	NM_016341.3	PLCE1	2.39	0.97	1	0.61	1.17	0.61	0.92	515
IP_260449.1	NM_001454.3	FOXJ1	2.98	0.55	0.49	1.02	0.76	0.29	0.49	60.5
IP_282610.1	NM_003081.3	SNAP25	4.35	4.05	4.35	3.95	4.04	4.19	4.09	68
IP_282610.1	NM_003081.3	SNAP25	4.35	4.05	4.35	3.95	4.04	4.19	4.09	68
IP_142634.1	XM_006715534.1	BAI3	5.68	2.45	3.49	1.23	1.89	2.3	1.84	426.5
IP_282608.1	XM_006723614.1	SNAP25	4.85	3.91	4.16	3.9	3.98	3.94	4.08	29.56
IP_282608.1	XM_006723614.1	SNAP25	4.85	3.91	4.16	3.9	3.98	3.94	4.08	29.56
IP_060135.1	NM_001198801.1	EIF4G3	1.43	1.3	1.75	0.75	1.07	1.64	0.42	165.5
IP_185116.1	NM_001271518.1	KCNMA1	3.15	2.73	3.28	3.23	3.12	2.26	3.07	297
IP_185116.1	NM_001271518.1	KCNMA1	3.15	2.73	3.28	3.23	3.12	2.26	3.07	297
IP_229500.1	NM_001130107.1	KLC1	0.73	0.85	1.23	1.8	1.61	0.67	1.14	14.44
IP_229502.1	NM_001130107.1	KLC1	0.79	0.85	0.6	0.64	0.65	1.38	0.38	133
IP_285614.1	NM_001281781.2	ZMYND8	2.85	1.31	2.57	1.22	1.27	1.79	0.83	397
IP_195469.1	NM_002804.4	PSMC3	1.03	1.45	1.28	2.13	1.25	0.87	1.04	72
IP_143652.1	NM_001170794.1	BACH2	3.33	1.56	1.3	1.31	1.31	1.48	1.53	318
IP_189489.1	NM_001288973.1	ADAM12	0.72	0.23	0.13	-0.28	0.23	0.52	0.59	86
IP_237079.1	XM_006720597.1	DET1	1.13	0.62	-0.02	0.3	1.12	0.94	0.7	182.5
IP_079669.1	NM_001278196.1	ZBTB18	3.39	2.86	2.89	3.2	2.71	3.04	2.44	202
IP_197380.1	NM_138732.2	NRXN2	0.92	1	1.69	1.01	0.9	1.57	0.74	159
IP_254644.1	NM_000723.4	CACNB1	0.82	0.79	1.15	0.82	0.85	0.77	0.88	170.5
IP_254644.1	NM_000723.4	CACNB1	0.82	0.79	1.15	0.82	0.85	0.77	0.88	170.5
IP_254644.1	NM_000723.4	CACNB1	0.82	0.79	1.15	0.82	0.85	0.77	0.88	170.5
IP_165132.1	NM_024721.4	ZFHX4	4.48	1.57	0.92	1.14	1.25	1.15	1.29	1.777
IP_185246.1	XM_005269988.1	ZMIZ1	2.32	1.43	1.46	0.81	1.23	1.65	1	505.5
IP_224421.1	XM_005267502.2	HECTD1	5.07	1.8	1.82	1.48	2.09	1.98	1.84	25.18
IP_305149.1	NM_001242640.1	BRCC3	NA	NA	NA	NA	NA	NA	NA	NA
IP_239335.1	XM_005255130.2	C16orf11	0.87	-0.56	-0.78	-0.48	-0.55	-0.39	-0.22	242
IP_209677.1	NM_020039.3	ASIC1	2.2	1.17	2.18	0.86	1.06	1.3	0.96	98
IP_216115.1	NM_032590.4	KDM2B	3.1	1.1	1.08	0.99	1.39	0.72	1.16	414.5
IP_188228.1	NM_145206.2	VTI1A	5.22	2.35	2.04	2.49	2.61	2.5	2.28	9.31
IP_243586.1	NM_052874.3	STX1B	2.54	1.16	1.52	1.21	1.14	0.64	0.83	62.5
IP_276822.1	NM_004069.3	AP2S1	1.76	1.91	1.88	2.27	1.65	1.44	1.71	15.14
IP_165115.1	NM_024721.4	ZFHX4	3.99	1.57	0.77	1.49	1.76	1.71	0.08	1,548.5
IP_243655.1	NM_182958.2	KAT8	1.64	0.7	0.57	0.57	0.42	0.21	1.23	74
IP_216750.1	NM_021009.5	UBC	0.32	0.71	1.47	1.56	0.97	0.29	1.24	179.5
IP_079668.1	NM_001278196.1	ZBTB18	4.37	2.81	2.85	2.42	3.39	2.96	2.58	201
IP_165122.1	NM_024721.4	ZFHX4	5.83	1.55	1.13	1.85	1.1	1.63	1.5	1.693
