# Supplementary material for: Deep transcriptome annotation enables the discovery and functional characterization of cryptic small proteins
Source: eLife journal article supplement (doi:10.7554/elife.27860), 2017-10-30
Supplement: supp [file elife-27860-supp-v1.zip › elife_poa_e27860_Figure_5_figure_supplement_2.pdf]

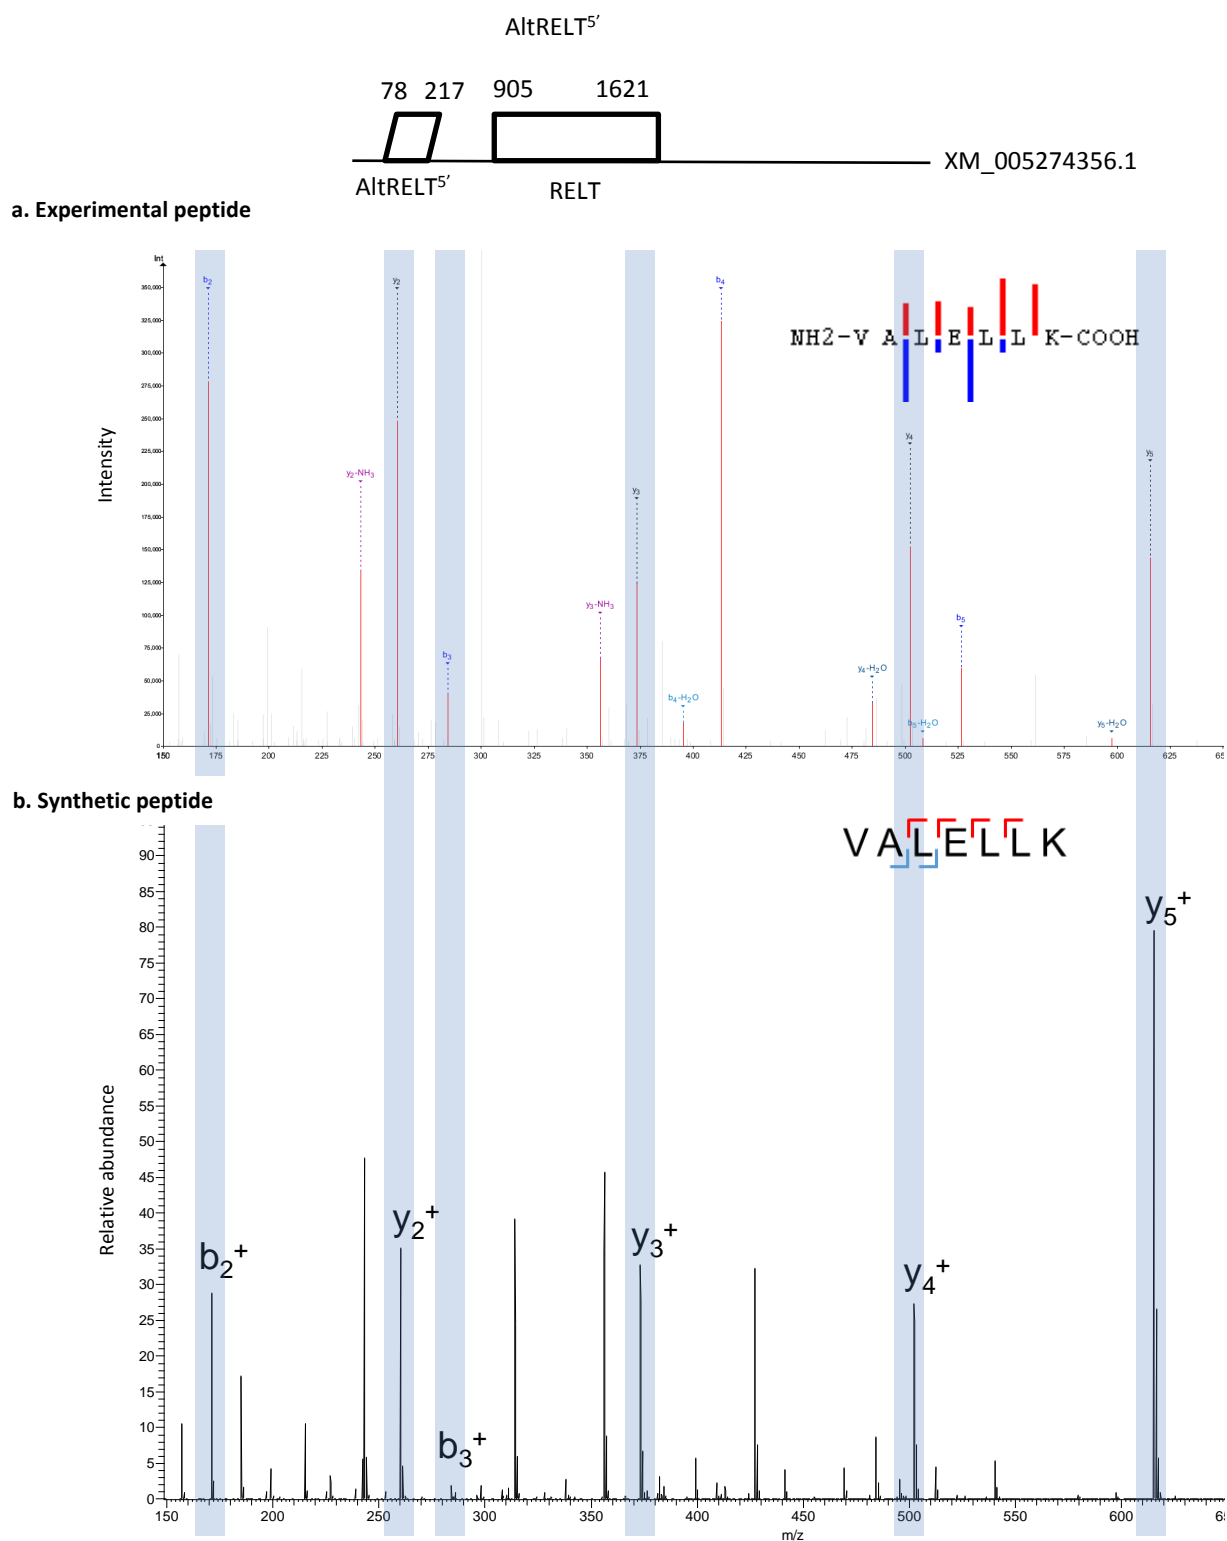

**Figure 5-figure supplement 2. Spectra validation for altRELT<sup>5'</sup>**

Example of validation for altRELT<sup>5'</sup> specific peptide VALELLK. (a) Experimental MS/MS spectra (PeptideShaker graphic interface output). (b) MS/MS spectra of the synthetic peptide.

Matching peaks are shown with blue masks. A diagram of the transcript with its accession number and the localization of the altORF and the CDS is shown at the top.
