# Supplementary material for: Deep transcriptome annotation enables the discovery and functional characterization of cryptic small proteins
Source: eLife journal article supplement (doi:10.7554/elife.27860), 2017-10-30
Supplement: supp [file elife-27860-supp-v1.zip › elife_poa_e27860_Figure_5_figure_supplement_3.pdf]

AltLINC01420<sup>nc</sup>

70 273

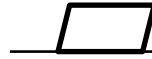

NR\_015367.2

### a. Experimental peptide

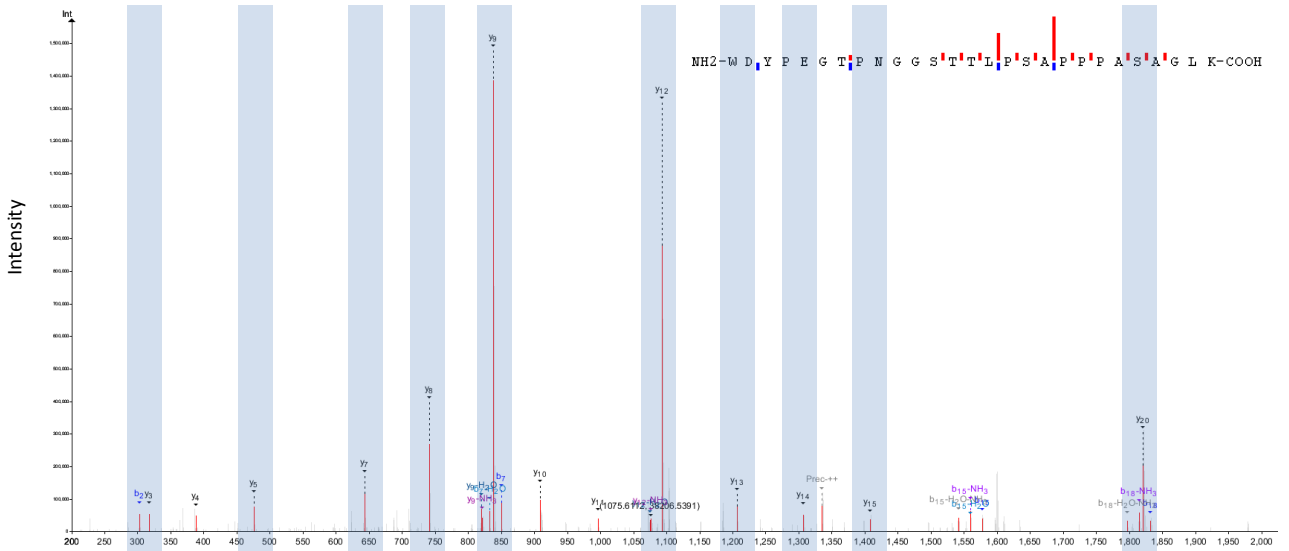

### b. Synthetic peptide

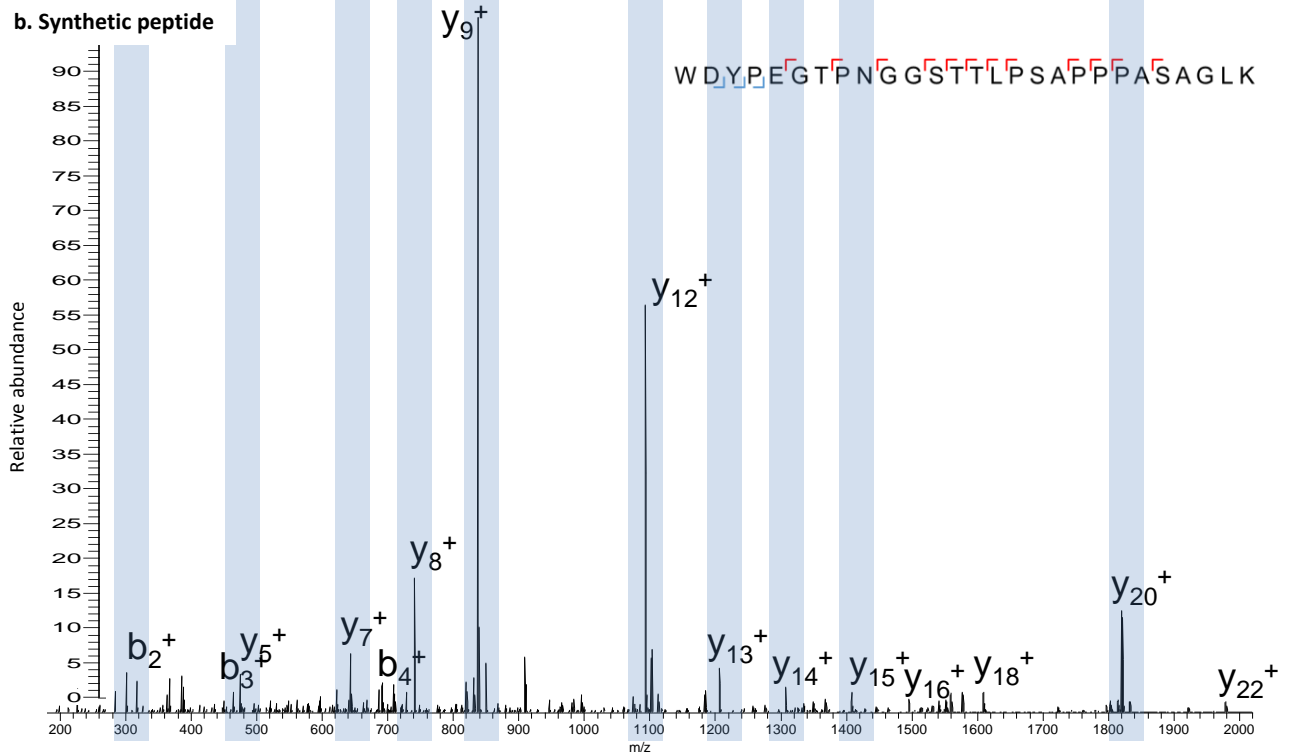

**Figure 5-figure supplement 3: Spectra validation for altLINC01420<sup>nc</sup>**

Example of validation for altLINC01420<sup>nc</sup> specific peptide

WDYPEGTPNGGSTTLPSAPPPASAGLK. (a) Experimental MS/MS spectra

(PeptideShaker graphic interface output). (b) MS/MS spectra of the synthetic peptide.

Matching peaks are shown with blue masks. A diagram of the transcript with its accession number and the localization of the altORF is shown at the top.
