# Supplementary material for: Deep transcriptome annotation enables the discovery and functional characterization of cryptic small proteins
Source: eLife journal article supplement (doi:10.7554/elife.27860), 2017-10-30
Supplement: supp [file elife-27860-supp-v1.zip › elife_poa_e27860_Figure_5_source_data_1.xlsx]

## Sheet: Feuil1
	Figure a
	Localization	% TIS
	CDS	0.369851
	altORF 5’	0.127941
	altORF CDS	0.149933
	altORF 3’	0.00508428
	altORF nc	0.0171258
	FIGURE b
		Alternative proteins	Reference proteins
	Human interactome	3957	10977
	10,000 human proteins	549	11617
	Human phosphoproteome	384	10456
	EGFR interactome	77	3376
	FIGURE c
	Localization	Unique Ids	%
	altORF5'	405	0.0831281
	altORFCDS	1939	0.397989
	altORF3'	1535	0.315066
	altORFnc	635	0.130337
	Unknown	285	0.0584975
	>1	73	0.0149836
