# Supplementary material for: Deep transcriptome annotation enables the discovery and functional characterization of cryptic small proteins
Source: eLife journal article supplement (doi:10.7554/elife.27860), 2017-10-30
Supplement: supp [file elife-27860-supp-v1.zip › elife_poa_e27860_Figure_6_figure_supplement_1.pdf]

a

AltLINC01420<sup>nc</sup>

MGDQPCASGRSTLPPGNAREAKPPKKRCLLAPRWDYEGTPNGGSTLPSAPPPASAGLKSHPPPEK

b

Spectrum & Fragment Ions (PR - NH<sub>2</sub>-WDY<p>PEGTPNGGSTLPSAPPPASAGLK-COOH - SH 3+ 917.09 m/z)

□ \_ ↕ ?

NH<sub>2</sub>-W D Y P E G T P N G G S T T L P S A P P P A S A G L K-COOH

m/z = 917.09  
[M+3H]<sup>3+</sup> = 2751.27 Da

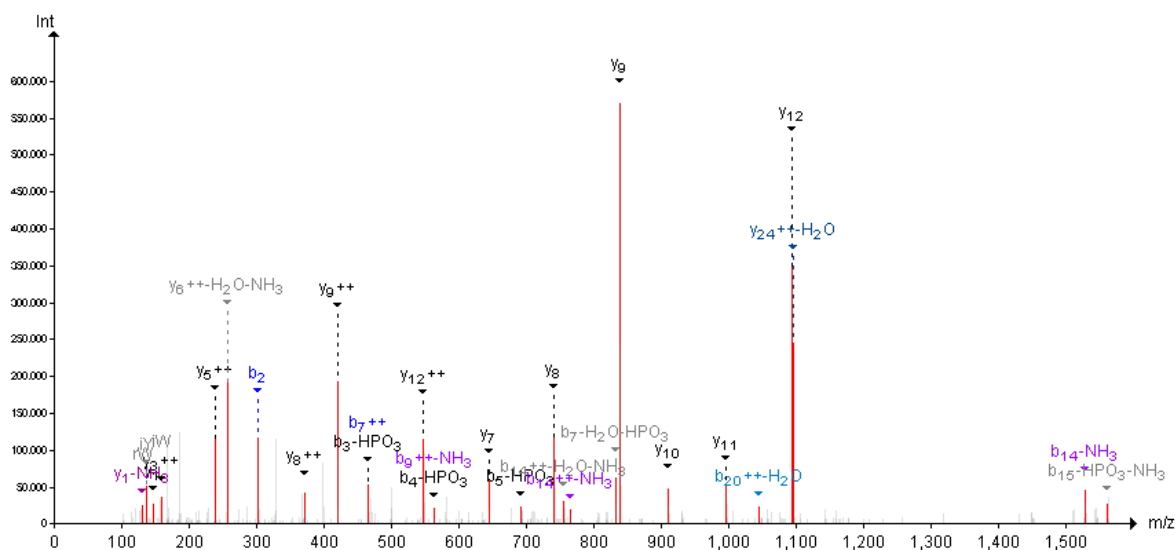

c

Spectrum & Fragment Ions (PR - NH<sub>2</sub>-WDYEGTPNGGSTLPSAPPPASAGLK-COOH - SH 3+ 890.43 m/z)

□ \_ ↕ ?

NH<sub>2</sub>-W D Y P E G T P N G G S T T L P S A P P P A S A G L K-COOH

m/z = 890.43  
[M+3H]<sup>3+</sup> = 2671.29 Da

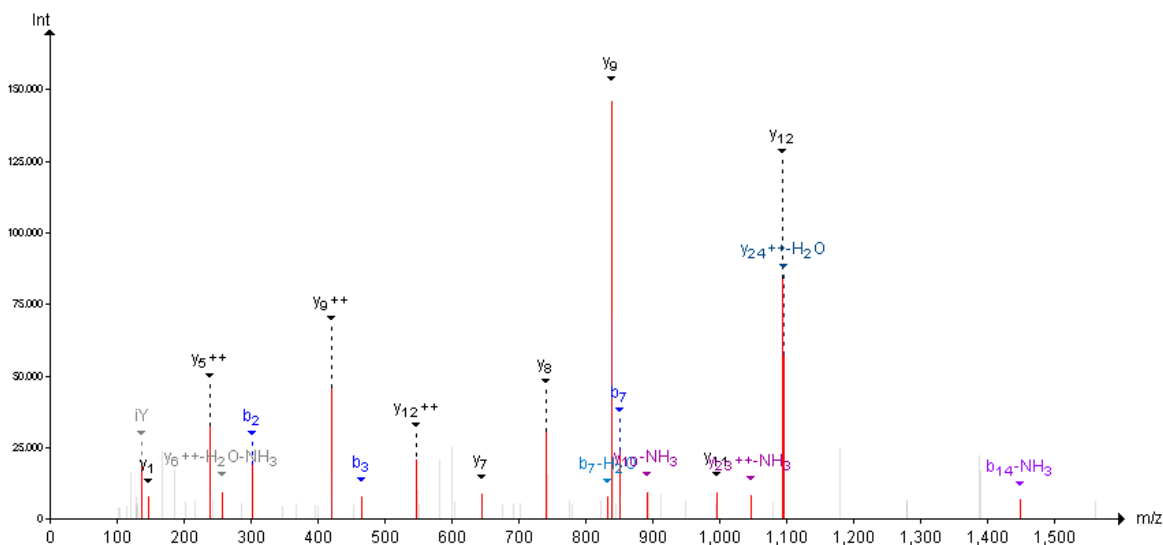

**Figure 6-figure supplement 1. Example of a phosphorylated peptide in mitosis - alternative protein AltLINC01420<sup>nc</sup> (LOC550643, IP\_305449.1).**

(a) AltLINC01420<sup>nc</sup> amino acid sequence with detected peptides underlined and phosphorylated peptide in bold (73,9% sequence coverage). (b) MS/MS spectrum for the phosphorylated peptide (PeptideShaker graphic interface output). The phosphorylation site is the tyrosine residue, position 2. (c) MS/MS spectrum for the non-phosphorylated peptide. The mass difference between the precursor ions between both spectra corresponds to that of a phosphorylation, confirming the specific phosphorylation of this residue in mitosis.
