# Supplementary material for: Deep transcriptome annotation enables the discovery and functional characterization of cryptic small proteins
Source: eLife journal article supplement (doi:10.7554/elife.27860), 2017-10-30
Supplement: supp [file elife-27860-supp-v1.zip › elife_poa_e27860_Figure_7_source_data_1.xlsx]

## Sheet: Sheet1
TIS	MS detection
IP_150054.1	IP_057249.1
IP_184133.1	IP_057343.1
IP_190190.1	IP_057611.1
IP_261431.1	IP_057693.1
IP_210970.1	IP_057741.1
IP_210975.1	IP_057776.1
IP_139156.1	IP_057938.1
IP_139152.1	IP_057975.1
IP_139158.1	IP_058210.1
IP_139157.1	IP_058253.1
IP_262966.1	IP_058267.1
IP_180992.1	IP_058271.1
IP_250782.1	IP_058298.1
IP_226654.1	IP_058310.1
IP_226652.1	IP_058313.1
IP_148765.1	IP_058317.1
IP_196860.1	IP_058465.1
IP_283983.1	IP_058597.1
IP_176213.1	IP_058654.1
IP_261975.1	IP_058683.1
IP_129741.1	IP_058716.1
IP_130379.1	IP_058717.1
IP_256956.1	IP_058745.1
IP_163928.1	IP_058770.1
IP_163930.1	IP_058814.1
IP_294217.1	IP_058870.1
IP_261533.1	IP_058876.1
IP_240154.1	IP_059017.1
IP_233142.1	IP_059021.1
IP_264929.1	IP_059036.1
IP_287563.1	IP_059070.1
IP_060456.1	IP_059100.1
IP_115789.1	IP_059203.1
IP_098842.1	IP_059204.1
IP_214335.1	IP_059236.1
IP_270977.1	IP_059285.1
IP_117895.1	IP_059384.1
IP_263238.1	IP_059512.1
IP_245358.1	IP_059627.1
IP_202186.1	IP_059650.1
IP_137838.1	IP_059653.1
IP_138917.1	IP_059668.1
IP_168205.1	IP_059752.1
IP_260829.1	IP_059766.1
IP_201829.1	IP_059768.1
IP_151925.1	IP_059860.1
IP_151924.1	IP_059931.1
IP_151926.1	IP_060028.1
IP_134389.1	IP_060034.1
IP_214456.1	IP_060036.1
IP_287562.1	IP_060058.1
IP_163752.1	IP_060102.1
IP_146492.1	IP_060147.1
IP_196352.1	IP_060199.1
IP_190931.1	IP_060202.1
IP_082217.1	IP_060277.1
IP_082225.1	IP_060337.1
IP_082221.1	IP_060396.1
IP_082226.1	IP_060473.1
IP_234022.1	IP_060592.1
IP_211878.1	IP_060703.1
IP_124747.1	IP_060806.1
IP_134808.1	IP_060911.1
IP_115390.1	IP_060916.1
IP_209748.1	IP_060918.1
IP_224262.1	IP_060935.1
IP_198434.1	IP_061244.1
IP_230173.1	IP_061264.1
IP_225817.1	IP_061331.1
IP_073964.1	IP_061342.1
IP_185596.1	IP_061364.1
IP_231542.1	IP_061446.1
IP_220353.1	IP_061518.1
IP_261483.1	IP_061670.1
IP_282619.1	IP_061737.1
IP_209671.1	IP_061940.1
IP_277822.1	IP_062095.1
IP_165141.1	IP_062164.1
IP_282624.1	IP_062201.1
IP_293929.1	IP_062205.1
IP_144742.1	IP_062224.1
IP_181441.1	IP_062226.1
IP_260632.1	IP_062330.1
IP_260635.1	IP_062337.1
IP_256464.1	IP_062422.1
IP_295339.1	IP_062441.1
IP_062609.1	IP_062455.1
IP_215950.1	IP_062460.1
IP_085737.1	IP_062488.1
IP_085739.1	IP_062516.1
IP_085741.1	IP_062533.1
IP_135276.1	IP_062567.1
IP_273661.1	IP_062570.1
IP_273663.1	IP_062573.1
IP_273666.1	IP_062576.1
IP_273667.1	IP_062593.1
IP_273988.1	IP_062605.1
IP_093814.1	IP_062610.1
IP_096572.1	IP_062778.1
IP_233465.1	IP_062811.1
IP_233466.1	IP_062964.1
IP_124600.1	IP_063016.1
IP_155175.1	IP_063022.1
IP_166248.1	IP_063102.1
IP_095284.1	IP_063137.1
IP_243266.1	IP_063208.1
IP_150954.1	IP_063270.1
IP_150960.1	IP_063304.1
IP_235298.1	IP_063353.1
IP_243261.1	IP_063448.1
IP_260244.1	IP_063464.1
IP_260379.1	IP_063499.1
IP_293678.1	IP_063516.1
IP_110880.1	IP_063528.1
IP_159279.1	IP_063565.1
IP_071081.1	IP_063670.1
IP_078933.1	IP_063671.1
IP_097945.1	IP_063713.1
IP_134704.1	IP_063810.1
IP_134700.1	IP_063908.1
IP_149731.1	IP_064191.1
IP_168160.1	IP_064233.1
IP_273142.1	IP_064255.1
IP_171451.1	IP_064288.1
IP_173084.1	IP_064398.1
IP_173082.1	IP_064458.1
IP_196836.1	IP_064493.1
IP_113619.1	IP_064498.1
IP_185775.1	IP_064537.1
IP_201427.1	IP_064564.1
IP_068719.1	IP_064618.1
IP_204795.1	IP_064647.1
IP_255098.1	IP_064663.1
IP_195825.1	IP_064729.1
IP_258446.1	IP_064781.1
IP_232062.1	IP_064965.1
IP_232066.1	IP_065012.1
IP_232068.1	IP_065081.1
IP_232081.1	IP_065105.1
IP_238386.1	IP_065119.1
IP_063193.1	IP_065246.1
IP_063202.1	IP_065341.1
IP_262125.1	IP_065380.1
IP_262143.1	IP_065421.1
IP_262144.1	IP_065491.1
IP_262142.1	IP_065602.1
IP_262141.1	IP_065718.1
IP_262145.1	IP_065755.1
IP_229439.1	IP_065822.1
IP_058475.1	IP_066090.1
IP_215857.1	IP_066151.1
IP_150056.1	IP_066183.1
IP_156269.1	IP_066448.1
IP_282371.1	IP_066575.1
IP_282375.1	IP_066653.1
IP_210579.1	IP_066677.1
IP_248475.1	IP_066684.1
IP_258924.1	IP_066734.1
IP_258930.1	IP_066740.1
IP_139492.1	IP_066794.1
IP_139494.1	IP_066828.1
IP_148807.1	IP_066910.1
IP_060128.1	IP_066960.1
IP_091097.1	IP_066964.1
IP_211613.1	IP_066969.1
IP_083837.1	IP_066991.1
IP_085545.1	IP_066995.1
IP_142564.1	IP_067117.1
IP_175988.1	IP_067392.1
IP_224945.1	IP_067464.1
IP_284623.1	IP_067475.1
IP_124748.1	IP_067493.1
IP_058467.1	IP_067592.1
IP_058474.1	IP_067595.1
IP_239220.1	IP_067651.1
IP_209593.1	IP_067704.1
IP_109183.1	IP_067715.1
IP_199356.1	IP_067724.1
IP_211724.1	IP_067729.1
IP_150956.1	IP_067750.1
IP_137733.1	IP_067828.1
IP_207765.1	IP_067913.1
IP_114678.1	IP_067938.1
IP_168469.1	IP_067996.1
IP_125957.1	IP_068044.1
IP_273259.1	IP_068049.1
IP_296457.1	IP_068062.1
IP_161681.1	IP_068079.1
IP_233844.1	IP_068127.1
IP_233847.1	IP_068265.1
IP_080600.1	IP_068342.1
IP_201317.1	IP_068367.1
IP_296170.1	IP_068377.1
IP_132894.1	IP_068408.1
IP_218671.1	IP_068519.1
IP_186975.1	IP_068621.1
IP_183565.1	IP_068637.1
IP_076677.1	IP_068814.1
IP_076682.1	IP_068938.1
IP_181442.1	IP_068987.1
IP_088157.1	IP_069017.1
IP_206118.1	IP_069157.1
IP_159492.1	IP_069193.1
IP_287429.1	IP_069215.1
IP_178893.1	IP_069303.1
IP_182090.1	IP_069309.1
IP_202639.1	IP_069455.1
IP_202641.1	IP_069479.1
IP_149637.1	IP_069482.1
IP_064133.1	IP_069530.1
IP_184508.1	IP_069724.1
IP_098649.1	IP_069745.1
IP_250233.1	IP_069838.1
IP_187670.1	IP_069932.1
IP_129231.1	IP_070008.1
IP_222146.1	IP_070028.1
IP_127571.1	IP_070053.1
IP_215855.1	IP_070060.1
IP_266360.1	IP_070173.1
IP_159319.1	IP_070240.1
IP_101232.1	IP_070279.1
IP_139736.1	IP_070304.1
IP_150188.1	IP_070314.1
IP_201434.1	IP_070342.1
IP_232679.1	IP_070344.1
IP_232681.1	IP_070460.1
IP_238385.1	IP_070485.1
IP_235656.1	IP_070494.1
IP_235659.1	IP_070517.1
IP_211881.1	IP_070778.1
IP_180547.1	IP_070812.1
IP_288906.1	IP_070826.1
IP_236236.1	IP_070922.1
IP_238992.1	IP_070959.1
IP_071423.1	IP_071054.1
IP_270974.1	IP_071086.1
IP_238640.1	IP_071094.1
IP_069879.1	IP_071099.1
IP_286500.1	IP_071127.1
IP_061924.1	IP_071192.1
IP_211157.1	IP_071296.1
IP_219029.1	IP_071339.1
IP_219031.1	IP_071524.1
IP_133014.1	IP_071649.1
IP_143940.1	IP_071677.1
IP_251123.1	IP_071846.1
IP_251127.1	IP_071851.1
IP_211429.1	IP_071882.1
IP_153091.1	IP_071898.1
IP_181444.1	IP_071927.1
IP_140918.1	IP_071989.1
IP_181445.1	IP_071993.1
IP_236827.1	IP_072254.1
IP_063101.1	IP_072263.1
IP_162336.1	IP_072355.1
IP_138867.1	IP_072358.1
IP_138869.1	IP_072363.1
IP_207802.1	IP_072573.1
IP_164575.1	IP_072902.1
IP_275568.1	IP_072941.1
IP_275562.1	IP_073028.1
IP_121455.1	IP_073045.1
IP_156080.1	IP_073166.1
IP_176380.1	IP_073213.1
IP_133712.1	IP_073266.1
IP_139792.1	IP_073339.1
IP_139957.1	IP_073385.1
IP_237193.1	IP_073421.1
IP_273747.1	IP_073559.1
IP_246451.1	IP_073633.1
IP_257118.1	IP_073742.1
IP_060888.1	IP_073750.1
IP_131802.1	IP_073764.1
IP_105032.1	IP_073767.1
IP_105036.1	IP_073823.1
IP_105039.1	IP_073906.1
IP_155471.1	IP_073907.1
IP_155032.1	IP_073910.1
IP_177071.1	IP_073912.1
IP_190188.1	IP_073968.1
IP_260640.1	IP_074071.1
IP_085826.1	IP_074188.1
IP_085822.1	IP_074194.1
IP_101538.1	IP_074307.1
IP_241857.1	IP_074308.1
IP_094487.1	IP_074417.1
IP_071488.1	IP_074539.1
IP_232799.1	IP_074578.1
IP_135275.1	IP_074608.1
IP_139061.1	IP_074635.1
IP_278042.1	IP_074665.1
IP_278048.1	IP_074694.1
IP_071707.1	IP_074695.1
IP_269073.1	IP_074757.1
IP_199037.1	IP_074825.1
IP_199038.1	IP_074871.1
IP_092264.1	IP_074915.1
IP_210795.1	IP_074959.1
IP_276860.1	IP_074978.1
IP_202816.1	IP_075088.1
IP_211067.1	IP_075115.1
IP_295246.1	IP_075135.1
IP_291598.1	IP_075140.1
IP_084892.1	IP_075229.1
IP_123348.1	IP_075288.1
IP_271322.1	IP_075318.1
IP_273408.1	IP_075531.1
IP_079854.1	IP_075601.1
IP_117572.1	IP_075607.1
IP_131322.1	IP_075633.1
IP_292771.1	IP_075640.1
IP_292777.1	IP_075700.1
IP_226553.1	IP_075703.1
IP_293949.1	IP_075898.1
IP_120585.1	IP_075961.1
IP_191561.1	IP_075975.1
IP_121694.1	IP_075988.1
IP_060134.1	IP_076017.1
IP_087331.1	IP_076162.1
IP_131260.1	IP_076180.1
IP_293018.1	IP_076294.1
IP_169466.1	IP_076405.1
IP_184583.1	IP_076552.1
IP_184584.1	IP_076571.1
IP_112943.1	IP_076602.1
IP_151534.1	IP_076623.1
IP_180995.1	IP_076689.1
IP_201809.1	IP_076782.1
IP_267967.1	IP_076937.1
IP_114660.1	IP_076976.1
IP_241360.1	IP_077031.1
IP_080287.1	IP_077047.1
IP_196959.1	IP_077220.1
IP_213521.1	IP_077426.1
IP_218508.1	IP_077583.1
IP_134974.1	IP_077598.1
IP_143714.1	IP_077636.1
IP_148762.1	IP_077645.1
IP_170898.1	IP_077696.1
IP_076331.1	IP_077702.1
IP_077080.1	IP_077721.1
IP_233303.1	IP_077741.1
IP_234031.1	IP_077743.1
IP_061009.1	IP_077803.1
IP_067719.1	IP_077862.1
IP_112503.1	IP_077937.1
IP_196786.1	IP_078056.1
IP_207727.1	IP_078066.1
IP_216616.1	IP_078173.1
IP_220879.1	IP_078180.1
IP_261521.1	IP_078193.1
IP_121988.1	IP_078316.1
IP_121994.1	IP_078329.1
IP_079312.1	IP_078378.1
IP_212397.1	IP_078381.1
IP_239625.1	IP_078420.1
IP_173071.1	IP_078476.1
IP_192987.1	IP_078595.1
IP_199033.1	IP_078616.1
IP_213911.1	IP_078628.1
IP_242465.1	IP_078754.1
IP_272369.1	IP_078755.1
IP_095687.1	IP_078772.1
IP_102644.1	IP_078875.1
IP_176381.1	IP_078905.1
IP_070043.1	IP_078943.1
IP_112191.1	IP_078969.1
IP_187091.1	IP_078989.1
IP_191426.1	IP_078994.1
IP_191439.1	IP_079061.1
IP_191437.1	IP_079157.1
IP_191443.1	IP_079170.1
IP_229228.1	IP_079178.1
IP_069734.1	IP_079228.1
IP_073107.1	IP_079288.1
IP_078518.1	IP_079289.1
IP_209594.1	IP_079300.1
IP_234441.1	IP_079312.1
IP_087197.1	IP_079365.1
IP_111733.1	IP_079371.1
IP_127040.1	IP_079386.1
IP_138888.1	IP_079398.1
IP_182738.1	IP_079430.1
IP_182741.1	IP_079517.1
IP_197256.1	IP_079520.1
IP_219591.1	IP_079795.1
IP_240520.1	IP_079827.1
IP_240523.1	IP_079838.1
IP_240522.1	IP_079886.1
IP_240521.1	IP_080131.1
IP_296129.1	IP_080146.1
IP_187283.1	IP_080163.1
IP_127732.1	IP_080166.1
IP_137696.1	IP_080278.1
IP_158201.1	IP_080300.1
IP_165958.1	IP_080303.1
IP_191375.1	IP_080491.1
IP_204754.1	IP_080507.1
IP_267971.1	IP_080544.1
IP_294289.1	IP_080571.1
IP_131544.1	IP_080577.1
IP_243229.1	IP_080600.1
IP_064742.1	IP_080618.1
IP_140368.1	IP_080703.1
IP_154790.1	IP_080874.1
IP_177639.1	IP_080917.1
IP_230822.1	IP_080932.1
IP_230834.1	IP_080967.1
IP_230840.1	IP_080973.1
IP_230843.1	IP_080993.1
IP_230842.1	IP_081007.1
IP_126273.1	IP_081055.1
IP_126282.1	IP_081130.1
IP_155031.1	IP_081144.1
IP_156877.1	IP_081261.1
IP_059851.1	IP_081262.1
IP_139017.1	IP_081314.1
IP_139022.1	IP_081327.1
IP_064628.1	IP_081342.1
IP_079676.1	IP_081378.1
IP_083859.1	IP_081464.1
IP_142233.1	IP_081475.1
IP_147227.1	IP_081490.1
IP_195910.1	IP_081536.1
IP_258432.1	IP_081546.1
IP_058469.1	IP_081563.1
IP_072887.1	IP_081668.1
IP_072893.1	IP_081716.1
IP_082879.1	IP_081759.1
IP_153136.1	IP_081890.1
IP_206406.1	IP_082004.1
IP_208040.1	IP_082054.1
IP_243264.1	IP_082125.1
IP_262700.1	IP_082230.1
IP_270975.1	IP_082298.1
IP_281223.1	IP_082316.1
IP_068564.1	IP_082519.1
IP_104801.1	IP_082657.1
IP_178005.1	IP_082679.1
IP_229759.1	IP_082705.1
IP_263580.1	IP_082727.1
IP_265602.1	IP_082760.1
IP_058704.1	IP_082768.1
IP_079900.1	IP_082823.1
IP_091496.1	IP_082839.1
IP_260815.1	IP_082873.1
IP_096683.1	IP_082928.1
IP_096690.1	IP_083018.1
IP_107986.1	IP_083028.1
IP_110948.1	IP_083047.1
IP_111602.1	IP_083082.1
IP_111927.1	IP_083195.1
IP_132254.1	IP_083300.1
IP_146804.1	IP_083307.1
IP_151343.1	IP_083309.1
IP_156109.1	IP_083317.1
IP_209419.1	IP_083344.1
IP_237138.1	IP_083428.1
IP_243294.1	IP_083452.1
IP_253056.1	IP_083467.1
IP_271064.1	IP_083483.1
IP_063704.1	IP_083527.1
IP_063707.1	IP_083596.1
IP_107713.1	IP_083699.1
IP_111048.1	IP_083754.1
IP_152288.1	IP_083953.1
IP_167417.1	IP_084052.1
IP_190954.1	IP_084095.1
IP_193429.1	IP_084117.1
IP_199736.1	IP_084152.1
IP_221118.1	IP_084360.1
IP_235292.1	IP_084431.1
IP_235338.1	IP_084451.1
IP_268613.1	IP_084591.1
IP_293632.1	IP_084597.1
IP_065029.1	IP_084615.1
IP_067468.1	IP_084627.1
IP_220630.1	IP_084635.1
IP_264132.1	IP_084703.1
IP_264136.1	IP_084802.1
IP_284383.1	IP_084938.1
IP_057674.1	IP_084986.1
IP_058466.1	IP_085058.1
IP_067715.1	IP_085093.1
IP_216993.1	IP_085106.1
IP_216990.1	IP_085131.1
IP_216995.1	IP_085156.1
IP_229906.1	IP_085260.1
IP_260126.1	IP_085291.1
IP_260127.1	IP_085313.1
IP_294118.1	IP_085330.1
IP_075516.1	IP_085519.1
IP_080593.1	IP_085638.1
IP_122132.1	IP_085672.1
IP_158705.1	IP_085694.1
IP_158706.1	IP_085887.1
IP_158707.1	IP_085922.1
IP_191382.1	IP_085935.1
IP_214939.1	IP_085941.1
IP_243348.1	IP_086002.1
IP_261702.1	IP_086073.1
IP_269788.1	IP_086143.1
IP_281516.1	IP_086144.1
IP_131020.1	IP_086147.1
IP_139521.1	IP_086236.1
IP_149559.1	IP_086357.1
IP_216220.1	IP_086381.1
IP_256211.1	IP_086382.1
IP_070836.1	IP_086460.1
IP_076801.1	IP_086477.1
IP_088158.1	IP_086502.1
IP_105361.1	IP_086533.1
IP_149208.1	IP_086634.1
IP_154827.1	IP_086735.1
IP_178926.1	IP_086812.1
IP_188741.1	IP_086814.1
IP_188858.1	IP_086830.1
IP_229446.1	IP_086851.1
IP_120922.1	IP_086863.1
IP_131326.1	IP_086869.1
IP_181992.1	IP_086911.1
IP_208924.1	IP_086935.1
IP_211431.1	IP_086954.1
IP_072504.1	IP_086980.1
IP_148406.1	IP_087011.1
IP_148402.1	IP_087068.1
IP_148404.1	IP_087126.1
IP_197900.1	IP_087138.1
IP_209591.1	IP_087161.1
IP_239624.1	IP_087236.1
IP_263266.1	IP_087267.1
IP_135709.1	IP_087319.1
IP_175981.1	IP_087437.1
IP_184502.1	IP_087443.1
IP_185909.1	IP_087509.1
IP_207082.1	IP_087530.1
IP_214188.1	IP_087556.1
IP_292407.1	IP_087588.1
IP_292411.1	IP_087602.1
IP_293077.1	IP_087687.1
IP_161449.1	IP_087754.1
IP_171206.1	IP_087766.1
IP_211786.1	IP_087787.1
IP_239138.1	IP_087812.1
IP_266579.1	IP_087893.1
IP_275362.1	IP_088013.1
IP_275826.1	IP_088070.1
IP_114610.1	IP_088083.1
IP_119188.1	IP_088215.1
IP_228318.1	IP_088240.1
IP_254040.1	IP_088264.1
IP_254045.1	IP_088318.1
IP_268241.1	IP_088423.1
IP_277188.1	IP_088437.1
IP_071500.1	IP_088447.1
IP_071503.1	IP_088462.1
IP_079723.1	IP_088464.1
IP_084510.1	IP_088516.1
IP_104606.1	IP_088525.1
IP_109684.1	IP_088657.1
IP_109690.1	IP_088696.1
IP_111315.1	IP_088748.1
IP_132095.1	IP_088774.1
IP_135133.1	IP_088791.1
IP_139101.1	IP_088805.1
IP_139384.1	IP_088839.1
IP_143139.1	IP_088940.1
IP_191564.1	IP_088994.1
IP_208230.1	IP_089034.1
IP_212585.1	IP_089138.1
IP_092107.1	IP_089311.1
IP_141603.1	IP_089334.1
IP_164954.1	IP_089342.1
IP_176204.1	IP_089344.1
IP_185702.1	IP_089362.1
IP_185708.1	IP_089476.1
IP_185704.1	IP_089481.1
IP_206420.1	IP_089489.1
IP_270982.1	IP_089490.1
IP_278045.1	IP_089581.1
IP_066177.1	IP_089606.1
IP_108413.1	IP_089647.1
IP_126822.1	IP_089668.1
IP_186038.1	IP_089699.1
IP_229190.1	IP_089734.1
IP_253066.1	IP_089747.1
IP_273578.1	IP_089841.1
IP_273583.1	IP_089942.1
IP_274246.1	IP_090008.1
IP_278463.1	IP_090141.1
IP_283955.1	IP_090154.1
IP_070163.1	IP_090177.1
IP_070679.1	IP_090177.1
IP_128885.1	IP_090293.1
IP_188851.1	IP_090317.1
IP_209284.1	IP_090397.1
IP_220772.1	IP_090461.1
IP_220782.1	IP_090465.1
IP_269880.1	IP_090482.1
IP_269886.1	IP_090501.1
IP_287996.1	IP_090561.1
IP_289474.1	IP_090579.1
IP_061066.1	IP_090648.1
IP_074908.1	IP_090649.1
IP_074913.1	IP_090747.1
IP_075796.1	IP_090791.1
IP_075791.1	IP_090829.1
IP_101355.1	IP_090837.1
IP_101360.1	IP_090839.1
IP_163119.1	IP_090872.1
IP_180225.1	IP_090957.1
IP_198542.1	IP_090976.1
IP_203651.1	IP_090995.1
IP_227218.1	IP_091004.1
IP_249027.1	IP_091042.1
IP_253720.1	IP_091106.1
IP_255560.1	IP_091138.1
IP_267540.1	IP_091172.1
IP_267548.1	IP_091255.1
IP_272452.1	IP_091377.1
IP_272456.1	IP_091382.1
IP_288115.1	IP_091730.1
IP_295123.1	IP_091750.1
IP_076842.1	IP_091751.1
IP_085521.1	IP_091771.1
IP_095352.1	IP_091784.1
IP_095357.1	IP_091801.1
IP_158280.1	IP_091817.1
IP_172638.1	IP_091912.1
IP_199918.1	IP_091933.1
IP_213637.1	IP_091972.1
IP_213639.1	IP_092060.1
IP_213646.1	IP_092073.1
IP_213655.1	IP_092096.1
IP_259121.1	IP_092163.1
IP_270986.1	IP_092193.1
IP_284175.1	IP_092220.1
IP_139810.1	IP_092276.1
IP_147288.1	IP_092396.1
IP_152459.1	IP_092554.1
IP_152450.1	IP_092561.1
IP_155285.1	IP_092565.1
IP_156194.1	IP_092582.1
IP_156195.1	IP_092583.1
IP_156198.1	IP_092599.1
IP_156200.1	IP_092672.1
IP_177329.1	IP_092699.1
IP_177407.1	IP_092758.1
IP_197788.1	IP_092768.1
IP_211426.1	IP_092769.1
IP_243262.1	IP_092777.1
IP_245937.1	IP_092783.1
IP_059883.1	IP_092859.1
IP_128472.1	IP_092860.1
IP_153979.1	IP_092877.1
IP_153981.1	IP_092903.1
IP_156945.1	IP_092927.1
IP_156947.1	IP_092931.1
IP_167119.1	IP_092956.1
IP_182324.1	IP_093128.1
IP_204578.1	IP_093130.1
IP_205741.1	IP_093184.1
IP_211430.1	IP_093234.1
IP_241332.1	IP_093245.1
IP_268629.1	IP_093277.1
IP_268849.1	IP_093506.1
IP_078416.1	IP_093524.1
IP_087354.1	IP_093601.1
IP_096576.1	IP_093742.1
IP_106078.1	IP_093748.1
IP_138588.1	IP_093765.1
IP_155287.1	IP_093791.1
IP_166527.1	IP_093803.1
IP_217877.1	IP_093849.1
IP_225628.1	IP_093883.1
IP_248399.1	IP_093897.1
IP_248397.1	IP_093901.1
IP_248400.1	IP_093982.1
IP_248401.1	IP_093998.1
IP_248404.1	IP_094017.1
IP_248403.1	IP_094031.1
IP_250427.1	IP_094039.1
IP_275167.1	IP_094050.1
IP_294337.1	IP_094195.1
IP_295243.1	IP_094327.1
IP_068721.1	IP_094329.1
IP_072867.1	IP_094377.1
IP_084167.1	IP_094476.1
IP_106292.1	IP_094482.1
IP_129652.1	IP_094512.1
IP_142563.1	IP_094555.1
IP_153652.1	IP_094573.1
IP_181993.1	IP_094611.1
IP_198557.1	IP_094643.1
IP_208949.1	IP_094645.1
IP_211427.1	IP_094696.1
IP_270976.1	IP_094786.1
IP_270981.1	IP_094791.1
IP_272454.1	IP_094840.1
IP_272457.1	IP_094925.1
IP_276445.1	IP_094956.1
IP_276824.1	IP_095004.1
IP_276822.1	IP_095020.1
IP_282623.1	IP_095045.1
IP_282951.1	IP_095159.1
IP_288624.1	IP_095193.1
IP_058034.1	IP_095196.1
IP_058585.1	IP_095273.1
IP_068847.1	IP_095286.1
IP_071748.1	IP_095357.1
IP_079378.1	IP_095362.1
IP_079392.1	IP_095399.1
IP_080090.1	IP_095523.1
IP_090339.1	IP_095526.1
IP_090369.1	IP_095601.1
IP_090371.1	IP_095655.1
IP_151932.1	IP_095701.1
IP_182325.1	IP_095723.1
IP_187224.1	IP_095725.1
IP_206179.1	IP_095727.1
IP_224956.1	IP_095731.1
IP_233118.1	IP_095737.1
IP_258139.1	IP_095737.1
IP_261526.1	IP_095739.1
IP_057670.1	IP_095816.1
IP_083362.1	IP_095819.1
IP_087246.1	IP_095852.1
IP_127313.1	IP_095925.1
IP_133820.1	IP_095957.1
IP_135050.1	IP_096125.1
IP_166907.1	IP_096178.1
IP_170114.1	IP_096228.1
IP_193171.1	IP_096391.1
IP_200793.1	IP_096482.1
IP_227792.1	IP_096574.1
IP_233265.1	IP_096575.1
IP_233273.1	IP_096620.1
IP_239874.1	IP_096629.1
IP_256312.1	IP_096635.1
IP_270081.1	IP_096645.1
IP_271284.1	IP_096714.1
IP_294943.1	IP_096815.1
IP_077017.1	IP_096867.1
IP_077016.1	IP_096877.1
IP_090330.1	IP_097027.1
IP_097676.1	IP_097097.1
IP_117007.1	IP_097175.1
IP_124901.1	IP_097214.1
IP_142939.1	IP_097333.1
IP_142949.1	IP_097449.1
IP_178656.1	IP_097452.1
IP_196341.1	IP_097467.1
IP_211848.1	IP_097535.1
IP_220210.1	IP_097574.1
IP_224043.1	IP_097726.1
IP_224049.1	IP_097806.1
IP_224998.1	IP_097908.1
IP_226591.1	IP_097919.1
IP_242243.1	IP_097938.1
IP_252708.1	IP_097981.1
IP_252712.1	IP_098030.1
IP_257583.1	IP_098034.1
IP_257587.1	IP_098047.1
IP_259178.1	IP_098091.1
IP_261523.1	IP_098155.1
IP_263888.1	IP_098164.1
IP_263896.1	IP_098234.1
IP_277646.1	IP_098242.1
IP_284235.1	IP_098282.1
IP_057673.1	IP_098292.1
IP_058465.1	IP_098320.1
IP_062355.1	IP_098323.1
IP_062356.1	IP_098478.1
IP_063059.1	IP_098482.1
IP_064288.1	IP_098563.1
IP_097700.1	IP_098578.1
IP_103002.1	IP_098640.1
IP_103005.1	IP_098645.1
IP_103006.1	IP_098647.1
IP_105379.1	IP_098794.1
IP_121454.1	IP_098794.1
IP_130639.1	IP_098801.1
IP_177688.1	IP_098845.1
IP_177698.1	IP_098859.1
IP_177694.1	IP_098965.1
IP_177691.1	IP_098983.1
IP_229319.1	IP_098985.1
IP_234768.1	IP_099000.1
IP_237139.1	IP_099012.1
IP_253740.1	IP_099099.1
IP_254820.1	IP_099138.1
IP_255038.1	IP_099186.1
IP_261538.1	IP_099346.1
IP_286527.1	IP_099374.1
IP_286902.1	IP_099499.1
IP_057677.1	IP_099510.1
IP_075176.1	IP_099544.1
IP_082759.1	IP_099576.1
IP_095295.1	IP_099609.1
IP_110803.1	IP_099672.1
IP_130134.1	IP_099679.1
IP_130225.1	IP_099761.1
IP_131278.1	IP_099766.1
IP_140596.1	IP_099868.1
IP_144573.1	IP_099925.1
IP_147574.1	IP_099967.1
IP_173026.1	IP_099973.1
IP_176107.1	IP_100016.1
IP_176955.1	IP_100074.1
IP_176962.1	IP_100164.1
IP_189833.1	IP_100218.1
IP_200635.1	IP_100334.1
IP_221501.1	IP_100340.1
IP_239699.1	IP_100372.1
IP_243139.1	IP_100494.1
IP_256313.1	IP_100516.1
IP_269074.1	IP_100564.1
IP_273381.1	IP_100567.1
IP_287318.1	IP_100576.1
IP_288626.1	IP_100672.1
IP_294845.1	IP_100704.1
IP_059884.1	IP_100713.1
IP_059888.1	IP_100781.1
IP_061206.1	IP_100919.1
IP_061216.1	IP_100997.1
IP_071776.1	IP_101006.1
IP_071785.1	IP_101020.1
IP_072632.1	IP_101055.1
IP_076676.1	IP_101065.1
IP_125822.1	IP_101070.1
IP_137837.1	IP_101097.1
IP_148024.1	IP_101107.1
IP_153898.1	IP_101133.1
IP_158499.1	IP_101255.1
IP_158501.1	IP_101310.1
IP_174536.1	IP_101343.1
IP_176379.1	IP_101379.1
IP_184126.1	IP_101390.1
IP_191986.1	IP_101471.1
IP_215932.1	IP_101706.1
IP_236013.1	IP_101794.1
IP_236239.1	IP_101848.1
IP_258447.1	IP_101903.1
IP_265413.1	IP_101943.1
IP_265528.1	IP_101999.1
IP_277483.1	IP_102107.1
IP_277678.1	IP_102111.1
IP_286704.1	IP_102266.1
IP_291396.1	IP_102330.1
IP_058470.1	IP_102411.1
IP_061953.1	IP_102433.1
IP_061958.1	IP_102450.1
IP_063937.1	IP_102481.1
IP_072620.1	IP_102497.1
IP_095627.1	IP_102746.1
IP_108557.1	IP_102774.1
IP_109108.1	IP_102843.1
IP_119848.1	IP_102853.1
IP_135008.1	IP_102911.1
IP_140957.1	IP_102918.1
IP_143414.1	IP_103067.1
IP_166247.1	IP_103090.1
IP_184606.1	IP_103106.1
IP_195826.1	IP_103184.1
IP_206445.1	IP_103203.1
IP_209897.1	IP_103356.1
IP_211648.1	IP_103492.1
IP_219796.1	IP_103514.1
IP_223559.1	IP_103601.1
IP_239875.1	IP_103637.1
IP_243683.1	IP_103640.1
IP_246708.1	IP_103661.1
IP_272453.1	IP_103686.1
IP_274651.1	IP_103825.1
IP_274658.1	IP_103829.1
IP_284943.1	IP_104034.1
IP_284941.1	IP_104048.1
IP_058579.1	IP_104194.1
IP_062433.1	IP_104299.1
IP_064845.1	IP_104391.1
IP_072826.1	IP_104397.1
IP_080283.1	IP_104428.1
IP_089440.1	IP_104457.1
IP_089442.1	IP_104458.1
IP_093646.1	IP_104575.1
IP_101783.1	IP_104664.1
IP_131513.1	IP_104675.1
IP_135597.1	IP_104710.1
IP_149713.1	IP_104856.1
IP_150444.1	IP_104864.1
IP_150446.1	IP_104905.1
IP_155444.1	IP_104921.1
IP_156754.1	IP_104924.1
IP_157576.1	IP_104926.1
IP_161472.1	IP_104927.1
IP_164302.1	IP_104932.1
IP_174191.1	IP_104944.1
IP_179160.1	IP_105004.1
IP_184901.1	IP_105020.1
IP_185905.1	IP_105049.1
IP_194413.1	IP_105125.1
IP_213906.1	IP_105249.1
IP_228882.1	IP_105331.1
IP_262965.1	IP_105400.1
IP_287228.1	IP_105509.1
IP_295554.1	IP_105547.1
IP_057805.1	IP_105580.1
IP_058430.1	IP_105585.1
IP_068116.1	IP_105593.1
IP_071885.1	IP_105608.1
IP_081021.1	IP_105684.1
IP_083235.1	IP_105686.1
IP_084077.1	IP_105710.1
IP_100206.1	IP_105766.1
IP_108010.1	IP_105817.1
IP_109201.1	IP_105849.1
IP_133071.1	IP_105858.1
IP_139674.1	IP_105973.1
IP_139680.1	IP_106006.1
IP_171803.1	IP_106070.1
IP_175768.1	IP_106098.1
IP_195199.1	IP_106136.1
IP_211832.1	IP_106249.1
IP_211960.1	IP_106298.1
IP_211965.1	IP_106556.1
IP_221360.1	IP_106726.1
IP_228489.1	IP_106801.1
IP_230270.1	IP_106820.1
IP_247651.1	IP_106862.1
IP_256310.1	IP_106892.1
IP_280020.1	IP_106959.1
IP_280023.1	IP_107053.1
IP_284151.1	IP_107054.1
IP_289467.1	IP_107062.1
IP_062432.1	IP_107071.1
IP_082871.1	IP_107152.1
IP_090592.1	IP_107183.1
IP_091987.1	IP_107238.1
IP_091997.1	IP_107315.1
IP_093433.1	IP_107333.1
IP_102156.1	IP_107482.1
IP_102190.1	IP_107532.1
IP_107985.1	IP_107541.1
IP_112095.1	IP_107542.1
IP_112262.1	IP_107580.1
IP_113249.1	IP_107599.1
IP_119276.1	IP_107621.1
IP_134382.1	IP_107644.1
IP_137961.1	IP_107692.1
IP_146111.1	IP_107697.1
IP_154772.1	IP_107723.1
IP_165153.1	IP_107851.1
IP_168383.1	IP_107868.1
IP_177087.1	IP_107915.1
IP_189209.1	IP_107953.1
IP_191219.1	IP_107966.1
IP_191221.1	IP_107975.1
IP_211428.1	IP_107991.1
IP_217404.1	IP_108003.1
IP_238443.1	IP_108060.1
IP_239510.1	IP_108086.1
IP_240212.1	IP_108221.1
IP_245898.1	IP_108267.1
IP_263268.1	IP_108285.1
IP_267658.1	IP_108287.1
IP_270907.1	IP_108350.1
IP_273402.1	IP_108445.1
IP_057402.1	IP_108464.1
IP_072894.1	IP_108573.1
IP_084272.1	IP_108606.1
IP_085033.1	IP_108722.1
IP_085267.1	IP_108743.1
IP_087903.1	IP_108815.1
IP_098516.1	IP_108867.1
IP_100202.1	IP_108871.1
IP_108130.1	IP_108952.1
IP_109198.1	IP_109007.1
IP_110079.1	IP_109046.1
IP_115759.1	IP_109053.1
IP_118076.1	IP_109065.1
IP_118162.1	IP_109076.1
IP_122310.1	IP_109100.1
IP_134403.1	IP_109224.1
IP_139060.1	IP_109276.1
IP_153548.1	IP_109281.1
IP_156949.1	IP_109344.1
IP_164726.1	IP_109346.1
IP_172051.1	IP_109441.1
IP_187642.1	IP_109477.1
IP_198560.1	IP_109486.1
IP_202125.1	IP_109557.1
IP_204994.1	IP_109617.1
IP_209880.1	IP_109636.1
IP_215915.1	IP_109674.1
IP_222054.1	IP_109694.1
IP_225315.1	IP_109949.1
IP_225334.1	IP_109952.1
IP_226461.1	IP_109998.1
IP_229427.1	IP_109999.1
IP_239808.1	IP_110022.1
IP_246502.1	IP_110032.1
IP_246598.1	IP_110066.1
IP_256957.1	IP_110079.1
IP_263265.1	IP_110081.1
IP_268552.1	IP_110183.1
IP_268832.1	IP_110231.1
IP_271876.1	IP_110245.1
IP_280644.1	IP_110248.1
IP_281956.1	IP_110288.1
IP_288715.1	IP_110296.1
IP_070236.1	IP_110331.1
IP_085518.1	IP_110376.1
IP_096571.1	IP_110397.1
IP_100470.1	IP_110398.1
IP_105494.1	IP_110399.1
IP_132094.1	IP_110408.1
IP_135936.1	IP_110474.1
IP_138010.1	IP_110510.1
IP_139259.1	IP_110532.1
IP_143933.1	IP_110541.1
IP_191523.1	IP_110558.1
IP_192941.1	IP_110613.1
IP_194475.1	IP_110672.1
IP_194494.1	IP_110891.1
IP_194495.1	IP_110948.1
IP_195198.1	IP_111034.1
IP_198462.1	IP_111158.1
IP_202634.1	IP_111310.1
IP_206304.1	IP_111496.1
IP_206305.1	IP_111501.1
IP_209716.1	IP_111799.1
IP_211612.1	IP_111866.1
IP_212691.1	IP_112025.1
IP_252576.1	IP_112054.1
IP_256311.1	IP_112181.1
IP_259125.1	IP_112246.1
IP_265674.1	IP_112247.1
IP_269090.1	IP_112365.1
IP_274656.1	IP_112453.1
IP_277102.1	IP_112546.1
IP_285323.1	IP_112550.1
IP_059409.1	IP_112559.1
IP_060457.1	IP_112588.1
IP_063712.1	IP_112609.1
IP_068220.1	IP_112624.1
IP_079724.1	IP_112687.1
IP_082844.1	IP_112699.1
IP_082848.1	IP_112798.1
IP_087324.1	IP_112870.1
IP_092644.1	IP_112893.1
IP_104240.1	IP_112910.1
IP_116483.1	IP_112911.1
IP_134977.1	IP_112930.1
IP_135164.1	IP_112946.1
IP_150018.1	IP_112963.1
IP_153423.1	IP_113054.1
IP_157430.1	IP_113234.1
IP_157437.1	IP_113390.1
IP_158277.1	IP_113401.1
IP_171802.1	IP_113445.1
IP_176080.1	IP_113510.1
IP_184503.1	IP_113519.1
IP_193172.1	IP_113546.1
IP_207033.1	IP_113559.1
IP_207036.1	IP_113614.1
IP_216388.1	IP_113670.1
IP_227082.1	IP_113728.1
IP_234473.1	IP_113770.1
IP_246895.1	IP_113787.1
IP_248029.1	IP_113794.1
IP_274704.1	IP_113846.1
IP_284458.1	IP_113914.1
IP_064618.1	IP_113983.1
IP_067994.1	IP_113998.1
IP_071485.1	IP_114043.1
IP_073904.1	IP_114144.1
IP_083225.1	IP_114172.1
IP_089152.1	IP_114200.1
IP_090236.1	IP_114225.1
IP_090946.1	IP_114237.1
IP_093665.1	IP_114303.1
IP_104234.1	IP_114305.1
IP_105150.1	IP_114309.1
IP_116480.1	IP_114396.1
IP_120921.1	IP_114410.1
IP_125662.1	IP_114418.1
IP_127739.1	IP_114453.1
IP_134738.1	IP_114466.1
IP_138606.1	IP_114564.1
IP_139513.1	IP_114580.1
IP_154212.1	IP_114621.1
IP_171449.1	IP_114755.1
IP_196833.1	IP_114833.1
IP_197193.1	IP_114835.1
IP_197490.1	IP_114916.1
IP_203802.1	IP_114941.1
IP_205739.1	IP_114997.1
IP_207221.1	IP_115008.1
IP_216765.1	IP_115044.1
IP_223715.1	IP_115160.1
IP_223722.1	IP_115226.1
IP_223732.1	IP_115288.1
IP_230219.1	IP_115346.1
IP_237476.1	IP_115411.1
IP_237489.1	IP_115542.1
IP_238848.1	IP_115631.1
IP_238850.1	IP_115840.1
IP_240928.1	IP_115860.1
IP_248048.1	IP_116027.1
IP_250392.1	IP_116039.1
IP_252685.1	IP_116085.1
IP_254916.1	IP_116086.1
IP_258441.1	IP_116117.1
IP_261162.1	IP_116183.1
IP_268441.1	IP_116271.1
IP_270367.1	IP_116273.1
IP_270368.1	IP_116300.1
IP_270870.1	IP_116363.1
IP_272436.1	IP_116395.1
IP_275095.1	IP_116421.1
IP_288273.1	IP_116435.1
IP_295241.1	IP_116485.1
IP_061875.1	IP_116618.1
IP_064815.1	IP_116636.1
IP_065462.1	IP_116689.1
IP_069813.1	IP_116750.1
IP_076635.1	IP_116772.1
IP_087917.1	IP_116780.1
IP_125289.1	IP_116812.1
IP_131320.1	IP_116827.1
IP_134809.1	IP_116843.1
IP_134811.1	IP_116896.1
IP_136297.1	IP_116983.1
IP_152124.1	IP_117002.1
IP_164532.1	IP_117021.1
IP_179586.1	IP_117035.1
IP_182327.1	IP_117062.1
IP_185724.1	IP_117102.1
IP_189185.1	IP_117176.1
IP_191141.1	IP_117182.1
IP_195531.1	IP_117252.1
IP_196451.1	IP_117279.1
IP_196467.1	IP_117306.1
IP_209592.1	IP_117311.1
IP_211202.1	IP_117494.1
IP_221854.1	IP_117546.1
IP_227254.1	IP_117547.1
IP_229225.1	IP_117568.1
IP_249478.1	IP_117869.1
IP_253849.1	IP_117895.1
IP_260172.1	IP_118014.1
IP_271667.1	IP_118109.1
IP_278047.1	IP_118126.1
IP_278590.1	IP_118162.1
IP_278609.1	IP_118183.1
IP_278607.1	IP_118189.1
IP_278610.1	IP_118231.1
IP_278611.1	IP_118267.1
IP_278613.1	IP_118354.1
IP_280645.1	IP_118415.1
IP_295240.1	IP_118456.1
IP_295398.1	IP_118509.1
IP_060117.1	IP_118666.1
IP_068733.1	IP_118676.1
IP_068752.1	IP_118770.1
IP_071708.1	IP_118773.1
IP_071726.1	IP_118775.1
IP_077451.1	IP_118989.1
IP_085823.1	IP_119104.1
IP_100187.1	IP_119139.1
IP_109054.1	IP_119274.1
IP_109113.1	IP_119286.1
IP_110628.1	IP_119404.1
IP_139862.1	IP_119413.1
IP_155369.1	IP_119429.1
IP_164012.1	IP_119432.1
IP_176377.1	IP_119444.1
IP_185896.1	IP_119456.1
IP_191579.1	IP_119528.1
IP_198034.1	IP_119659.1
IP_205744.1	IP_119718.1
IP_215122.1	IP_119729.1
IP_225313.1	IP_119749.1
IP_226235.1	IP_119792.1
IP_226238.1	IP_119796.1
IP_226240.1	IP_119908.1
IP_226244.1	IP_119915.1
IP_226253.1	IP_119950.1
IP_226256.1	IP_119999.1
IP_228869.1	IP_120020.1
IP_233038.1	IP_120032.1
IP_235354.1	IP_120050.1
IP_235439.1	IP_120126.1
IP_239443.1	IP_120132.1
IP_239622.1	IP_120136.1
IP_247999.1	IP_120173.1
IP_250753.1	IP_120210.1
IP_255163.1	IP_120251.1
IP_257140.1	IP_120259.1
IP_258098.1	IP_120264.1
IP_267838.1	IP_120283.1
IP_270816.1	IP_120376.1
IP_273967.1	IP_120378.1
IP_276405.1	IP_120427.1
IP_284155.1	IP_120479.1
IP_285135.1	IP_120643.1
IP_285974.1	IP_120682.1
IP_287223.1	IP_120757.1
IP_289998.1	IP_120824.1
IP_291664.1	IP_120879.1
IP_291670.1	IP_120975.1
IP_292179.1	IP_120978.1
IP_061960.1	IP_120988.1
IP_061954.1	IP_121067.1
IP_062357.1	IP_121156.1
IP_068022.1	IP_121170.1
IP_068800.1	IP_121172.1
IP_078154.1	IP_121195.1
IP_083728.1	IP_121226.1
IP_087279.1	IP_121260.1
IP_100389.1	IP_121313.1
IP_104728.1	IP_121316.1
IP_115504.1	IP_121363.1
IP_123103.1	IP_121400.1
IP_124749.1	IP_121509.1
IP_125571.1	IP_121514.1
IP_126277.1	IP_121517.1
IP_130189.1	IP_121792.1
IP_131378.1	IP_121835.1
IP_144629.1	IP_122044.1
IP_146150.1	IP_122059.1
IP_164163.1	IP_122066.1
IP_176797.1	IP_122217.1
IP_182726.1	IP_122307.1
IP_184984.1	IP_122416.1
IP_191493.1	IP_122422.1
IP_196960.1	IP_122511.1
IP_197482.1	IP_122525.1
IP_197612.1	IP_122528.1
IP_208182.1	IP_122540.1
IP_209309.1	IP_122543.1
IP_215162.1	IP_122549.1
IP_216591.1	IP_122629.1
IP_223511.1	IP_122631.1
IP_230833.1	IP_122680.1
IP_243846.1	IP_122720.1
IP_245894.1	IP_122808.1
IP_247653.1	IP_122810.1
IP_256455.1	IP_122821.1
IP_259128.1	IP_122848.1
IP_259433.1	IP_122865.1
IP_264541.1	IP_122866.1
IP_264547.1	IP_123048.1
IP_271288.1	IP_123065.1
IP_273406.1	IP_123256.1
IP_275093.1	IP_123335.1
IP_275098.1	IP_123477.1
IP_275102.1	IP_123506.1
IP_276924.1	IP_123509.1
IP_290287.1	IP_123561.1
IP_291666.1	IP_123749.1
IP_293290.1	IP_123790.1
IP_063186.1	IP_123907.1
IP_064684.1	IP_123926.1
IP_065772.1	IP_123949.1
IP_071883.1	IP_123982.1
IP_081752.1	IP_124018.1
IP_095315.1	IP_124061.1
IP_096575.1	IP_124065.1
IP_097239.1	IP_124126.1
IP_106853.1	IP_124168.1
IP_108176.1	IP_124186.1
IP_108174.1	IP_124238.1
IP_118263.1	IP_124268.1
IP_118273.1	IP_124353.1
IP_128833.1	IP_124475.1
IP_129177.1	IP_124506.1
IP_129870.1	IP_124562.1
IP_135006.1	IP_124589.1
IP_135265.1	IP_124599.1
IP_152165.1	IP_124625.1
IP_154289.1	IP_124655.1
IP_158498.1	IP_124666.1
IP_158497.1	IP_124669.1
IP_161470.1	IP_124695.1
IP_170213.1	IP_124758.1
IP_181262.1	IP_124831.1
IP_187442.1	IP_124859.1
IP_193746.1	IP_124877.1
IP_194411.1	IP_125007.1
IP_194405.1	IP_125039.1
IP_195843.1	IP_125043.1
IP_195852.1	IP_125061.1
IP_197325.1	IP_125077.1
IP_197837.1	IP_125150.1
IP_211879.1	IP_125208.1
IP_214592.1	IP_125255.1
IP_216083.1	IP_125282.1
IP_218593.1	IP_125317.1
IP_219743.1	IP_125358.1
IP_219987.1	IP_125417.1
IP_223738.1	IP_125435.1
IP_226321.1	IP_125454.1
IP_232663.1	IP_125536.1
IP_237070.1	IP_125546.1
IP_237096.1	IP_125563.1
IP_244949.1	IP_125636.1
IP_245222.1	IP_125660.1
IP_263618.1	IP_125702.1
IP_266131.1	IP_125748.1
IP_267615.1	IP_125838.1
IP_267613.1	IP_125911.1
IP_267610.1	IP_125918.1
IP_269412.1	IP_125941.1
IP_270886.1	IP_125980.1
IP_276988.1	IP_125990.1
IP_276994.1	IP_126044.1
IP_283956.1	IP_126164.1
IP_284345.1	IP_126170.1
IP_291728.1	IP_126180.1
IP_059885.1	IP_126241.1
IP_068597.1	IP_126274.1
IP_072950.1	IP_126382.1
IP_076678.1	IP_126434.1
IP_079359.1	IP_126441.1
IP_082872.1	IP_126528.1
IP_084724.1	IP_126557.1
IP_084719.1	IP_126570.1
IP_085882.1	IP_126592.1
IP_086645.1	IP_126681.1
IP_092026.1	IP_126694.1
IP_094745.1	IP_126698.1
IP_096573.1	IP_126876.1
IP_100457.1	IP_126889.1
IP_103678.1	IP_126933.1
IP_103810.1	IP_126941.1
IP_103847.1	IP_127004.1
IP_104238.1	IP_127067.1
IP_109107.1	IP_127110.1
IP_110938.1	IP_127157.1
IP_112247.1	IP_127199.1
IP_127929.1	IP_127249.1
IP_131498.1	IP_127263.1
IP_131600.1	IP_127272.1
IP_133266.1	IP_127332.1
IP_135009.1	IP_127373.1
IP_135053.1	IP_127389.1
IP_146168.1	IP_127407.1
IP_155258.1	IP_127477.1
IP_160415.1	IP_127571.1
IP_163393.1	IP_127578.1
IP_166449.1	IP_127682.1
IP_171197.1	IP_127705.1
IP_171448.1	IP_127857.1
IP_176135.1	IP_127994.1
IP_179053.1	IP_128003.1
IP_188119.1	IP_128075.1
IP_193748.1	IP_128131.1
IP_193747.1	IP_128145.1
IP_194612.1	IP_128186.1
IP_195486.1	IP_128190.1
IP_197640.1	IP_128227.1
IP_197985.1	IP_128260.1
IP_199639.1	IP_128318.1
IP_203469.1	IP_128365.1
IP_224547.1	IP_128400.1
IP_226550.1	IP_128446.1
IP_227258.1	IP_128483.1
IP_231179.1	IP_128571.1
IP_235931.1	IP_128605.1
IP_239264.1	IP_128634.1
IP_247972.1	IP_128681.1
IP_247981.1	IP_128699.1
IP_248646.1	IP_128717.1
IP_249638.1	IP_128797.1
IP_254041.1	IP_128805.1
IP_263277.1	IP_128886.1
IP_263668.1	IP_128975.1
IP_289068.1	IP_129001.1
IP_295122.1	IP_129016.1
IP_061114.1	IP_129026.1
IP_062354.1	IP_129072.1
IP_066886.1	IP_129095.1
IP_067422.1	IP_129251.1
IP_075686.1	IP_129302.1
IP_078137.1	IP_129393.1
IP_084082.1	IP_129568.1
IP_084181.1	IP_129648.1
IP_097668.1	IP_129723.1
IP_097796.1	IP_129783.1
IP_103282.1	IP_129787.1
IP_109831.1	IP_130133.1
IP_112574.1	IP_130213.1
IP_130232.1	IP_130302.1
IP_130926.1	IP_130363.1
IP_131276.1	IP_130387.1
IP_131285.1	IP_130466.1
IP_131319.1	IP_130537.1
IP_135010.1	IP_130649.1
IP_136599.1	IP_130668.1
IP_137396.1	IP_130792.1
IP_139386.1	IP_130809.1
IP_156823.1	IP_130813.1
IP_156943.1	IP_130922.1
IP_158496.1	IP_130973.1
IP_164013.1	IP_131030.1
IP_167807.1	IP_131078.1
IP_168244.1	IP_131094.1
IP_178849.1	IP_131178.1
IP_178872.1	IP_131258.1
IP_184139.1	IP_131294.1
IP_195823.1	IP_131393.1
IP_195898.1	IP_131506.1
IP_196832.1	IP_131550.1
IP_197167.1	IP_131605.1
IP_197195.1	IP_131619.1
IP_202647.1	IP_131625.1
IP_207356.1	IP_131908.1
IP_210468.1	IP_132011.1
IP_210490.1	IP_132223.1
IP_210645.1	IP_132227.1
IP_211463.1	IP_132278.1
IP_211464.1	IP_132314.1
IP_213662.1	IP_132454.1
IP_213668.1	IP_132527.1
IP_217000.1	IP_132612.1
IP_223305.1	IP_132639.1
IP_224875.1	IP_132676.1
IP_225515.1	IP_132767.1
IP_230242.1	IP_132898.1
IP_234770.1	IP_133033.1
IP_237360.1	IP_133035.1
IP_237364.1	IP_133098.1
IP_239439.1	IP_133111.1
IP_241279.1	IP_133189.1
IP_242997.1	IP_133267.1
IP_257624.1	IP_133330.1
IP_265940.1	IP_133341.1
IP_269075.1	IP_133496.1
IP_272352.1	IP_133545.1
IP_275481.1	IP_133721.1
IP_277709.1	IP_133830.1
IP_277747.1	IP_133852.1
IP_283992.1	IP_133891.1
IP_287296.1	IP_133905.1
IP_287880.1	IP_134033.1
IP_293952.1	IP_134066.1
IP_294212.1	IP_134100.1
IP_058788.1	IP_134113.1
IP_065006.1	IP_134114.1
IP_066491.1	IP_134144.1
IP_071749.1	IP_134172.1
IP_072866.1	IP_134291.1
IP_078104.1	IP_134304.1
IP_084160.1	IP_134342.1
IP_086641.1	IP_134376.1
IP_092268.1	IP_134597.1
IP_104885.1	IP_134725.1
IP_106106.1	IP_134777.1
IP_112192.1	IP_134778.1
IP_115925.1	IP_134839.1
IP_126580.1	IP_134906.1
IP_129396.1	IP_134919.1
IP_131087.1	IP_134930.1
IP_135047.1	IP_134954.1
IP_139641.1	IP_135038.1
IP_145993.1	IP_135093.1
IP_147226.1	IP_135110.1
IP_147230.1	IP_135256.1
IP_148216.1	IP_135280.1
IP_153545.1	IP_135285.1
IP_164888.1	IP_135303.1
IP_168061.1	IP_135373.1
IP_168063.1	IP_135391.1
IP_168406.1	IP_135448.1
IP_168499.1	IP_135468.1
IP_168500.1	IP_135480.1
IP_173748.1	IP_135484.1
IP_186631.1	IP_135494.1
IP_188842.1	IP_135497.1
IP_191590.1	IP_135561.1
IP_193170.1	IP_135582.1
IP_196436.1	IP_135751.1
IP_196438.1	IP_135790.1
IP_196496.1	IP_135891.1
IP_196643.1	IP_136019.1
IP_196830.1	IP_136036.1
IP_197648.1	IP_136058.1
IP_198346.1	IP_136079.1
IP_200129.1	IP_136134.1
IP_202520.1	IP_136139.1
IP_216284.1	IP_136180.1
IP_220175.1	IP_136194.1
IP_221366.1	IP_136210.1
IP_228884.1	IP_136217.1
IP_229443.1	IP_136310.1
IP_233041.1	IP_136344.1
IP_235441.1	IP_136413.1
IP_236039.1	IP_136423.1
IP_236067.1	IP_136431.1
IP_239434.1	IP_136445.1
IP_241388.1	IP_136504.1
IP_243685.1	IP_136514.1
IP_243911.1	IP_136550.1
IP_250428.1	IP_136558.1
IP_253723.1	IP_136563.1
IP_255459.1	IP_136569.1
IP_255483.1	IP_136576.1
IP_255499.1	IP_136592.1
IP_256457.1	IP_136688.1
IP_258141.1	IP_136738.1
IP_258542.1	IP_136778.1
IP_258901.1	IP_136808.1
IP_259129.1	IP_136823.1
IP_260400.1	IP_136845.1
IP_261644.1	IP_136931.1
IP_264781.1	IP_136982.1
IP_264784.1	IP_137018.1
IP_266102.1	IP_137065.1
IP_271495.1	IP_137177.1
IP_282275.1	IP_137238.1
IP_283444.1	IP_137279.1
IP_058326.1	IP_137285.1
IP_058327.1	IP_137335.1
IP_059490.1	IP_137339.1
IP_062410.1	IP_137343.1
IP_063808.1	IP_137439.1
IP_071752.1	IP_137442.1
IP_071754.1	IP_137483.1
IP_071757.1	IP_137497.1
IP_072907.1	IP_137499.1
IP_072910.1	IP_137528.1
IP_073231.1	IP_137605.1
IP_078344.1	IP_137646.1
IP_078383.1	IP_137654.1
IP_078468.1	IP_137655.1
IP_084940.1	IP_137676.1
IP_098740.1	IP_137719.1
IP_109109.1	IP_137791.1
IP_109223.1	IP_138028.1
IP_112250.1	IP_138145.1
IP_112534.1	IP_138210.1
IP_112874.1	IP_138253.1
IP_123271.1	IP_138289.1
IP_130784.1	IP_138333.1
IP_133070.1	IP_138348.1
IP_138517.1	IP_138411.1
IP_139639.1	IP_138449.1
IP_139646.1	IP_138490.1
IP_141186.1	IP_138555.1
IP_142937.1	IP_138595.1
IP_154786.1	IP_138596.1
IP_155284.1	IP_138630.1
IP_155972.1	IP_138635.1
IP_168269.1	IP_138716.1
IP_180155.1	IP_138800.1
IP_180978.1	IP_138881.1
IP_182017.1	IP_138948.1
IP_182098.1	IP_139222.1
IP_182108.1	IP_139231.1
IP_184506.1	IP_139260.1
IP_187174.1	IP_139276.1
IP_187617.1	IP_139297.1
IP_187623.1	IP_139331.1
IP_197504.1	IP_139352.1
IP_204014.1	IP_139370.1
IP_204799.1	IP_139398.1
IP_205790.1	IP_139431.1
IP_208163.1	IP_139484.1
IP_208725.1	IP_139494.1
IP_209081.1	IP_139566.1
IP_212392.1	IP_139673.1
IP_213595.1	IP_139694.1
IP_218857.1	IP_139745.1
IP_219261.1	IP_139811.1
IP_220705.1	IP_139850.1
IP_221502.1	IP_139870.1
IP_223590.1	IP_139880.1
IP_223644.1	IP_139900.1
IP_223637.1	IP_139944.1
IP_228208.1	IP_140051.1
IP_235381.1	IP_140178.1
IP_243272.1	IP_140251.1
IP_245766.1	IP_140370.1
IP_245780.1	IP_140377.1
IP_247625.1	IP_140428.1
IP_251316.1	IP_140463.1
IP_255455.1	IP_140534.1
IP_255863.1	IP_140647.1
IP_257848.1	IP_140663.1
IP_259190.1	IP_140871.1
IP_274055.1	IP_141017.1
IP_274065.1	IP_141030.1
IP_286525.1	IP_141065.1
IP_289118.1	IP_141120.1
IP_293980.1	IP_141187.1
IP_294969.1	IP_141247.1
IP_296462.1	IP_141256.1
IP_058702.1	IP_141325.1
IP_059265.1	IP_141362.1
IP_061432.1	IP_141375.1
IP_061438.1	IP_141478.1
IP_063626.1	IP_141604.1
IP_067689.1	IP_141671.1
IP_067696.1	IP_141685.1
IP_067773.1	IP_141769.1
IP_071724.1	IP_141771.1
IP_084174.1	IP_141772.1
IP_084178.1	IP_141808.1
IP_085606.1	IP_141850.1
IP_091188.1	IP_141877.1
IP_096197.1	IP_142005.1
IP_101133.1	IP_142172.1
IP_104203.1	IP_142244.1
IP_106434.1	IP_142306.1
IP_108978.1	IP_142393.1
IP_109022.1	IP_142409.1
IP_110518.1	IP_142460.1
IP_111828.1	IP_142509.1
IP_115513.1	IP_142574.1
IP_115507.1	IP_142608.1
IP_117903.1	IP_142627.1
IP_117901.1	IP_142663.1
IP_119589.1	IP_142841.1
IP_119588.1	IP_142942.1
IP_119612.1	IP_143001.1
IP_128530.1	IP_143014.1
IP_130677.1	IP_143074.1
IP_133183.1	IP_143184.1
IP_135912.1	IP_143224.1
IP_137689.1	IP_143227.1
IP_138761.1	IP_143315.1
IP_143058.1	IP_143326.1
IP_143418.1	IP_143455.1
IP_144086.1	IP_143536.1
IP_145630.1	IP_143566.1
IP_154163.1	IP_143594.1
IP_155236.1	IP_143712.1
IP_162831.1	IP_143723.1
IP_164011.1	IP_143739.1
IP_166621.1	IP_143767.1
IP_167952.1	IP_143878.1
IP_168540.1	IP_143914.1
IP_171045.1	IP_143969.1
IP_171637.1	IP_143990.1
IP_172047.1	IP_144134.1
IP_174210.1	IP_144136.1
IP_177979.1	IP_144138.1
IP_182427.1	IP_144163.1
IP_182436.1	IP_144174.1
IP_182441.1	IP_144191.1
IP_182445.1	IP_144204.1
IP_184624.1	IP_144299.1
IP_185386.1	IP_144326.1
IP_192150.1	IP_144404.1
IP_194429.1	IP_144417.1
IP_195470.1	IP_144432.1
IP_195853.1	IP_144456.1
IP_197063.1	IP_144504.1
IP_198159.1	IP_144506.1
IP_202651.1	IP_144511.1
IP_202650.1	IP_144587.1
IP_203797.1	IP_144602.1
IP_206350.1	IP_144664.1
IP_206359.1	IP_144700.1
IP_211833.1	IP_144806.1
IP_213451.1	IP_144912.1
IP_214590.1	IP_144915.1
IP_214937.1	IP_144995.1
IP_215110.1	IP_145081.1
IP_215682.1	IP_145086.1
IP_216462.1	IP_145310.1
IP_224153.1	IP_145361.1
IP_225555.1	IP_145372.1
IP_226322.1	IP_145503.1
IP_226806.1	IP_145533.1
IP_229875.1	IP_145571.1
IP_235724.1	IP_145702.1
IP_239173.1	IP_145715.1
IP_239180.1	IP_145727.1
IP_243907.1	IP_145779.1
IP_243909.1	IP_145946.1
IP_254599.1	IP_145946.1
IP_255461.1	IP_145950.1
IP_258058.1	IP_146008.1
IP_258437.1	IP_146010.1
IP_260107.1	IP_146020.1
IP_260698.1	IP_146021.1
IP_268208.1	IP_146043.1
IP_273960.1	IP_146050.1
IP_278461.1	IP_146177.1
IP_278771.1	IP_146182.1
IP_280643.1	IP_146183.1
IP_281425.1	IP_146200.1
IP_282157.1	IP_146212.1
IP_283993.1	IP_146247.1
IP_285404.1	IP_146418.1
IP_293171.1	IP_146461.1
IP_293178.1	IP_146494.1
IP_293956.1	IP_146518.1
IP_293983.1	IP_146530.1
IP_295097.1	IP_146572.1
IP_061609.1	IP_146622.1
IP_061942.1	IP_146840.1
IP_062175.1	IP_146848.1
IP_072949.1	IP_146952.1
IP_077758.1	IP_147010.1
IP_079285.1	IP_147040.1
IP_088359.1	IP_147074.1
IP_095158.1	IP_147090.1
IP_096574.1	IP_147140.1
IP_101534.1	IP_147174.1
IP_104042.1	IP_147187.1
IP_105819.1	IP_147215.1
IP_106661.1	IP_147425.1
IP_106927.1	IP_147488.1
IP_110377.1	IP_147674.1
IP_110602.1	IP_147714.1
IP_111922.1	IP_147734.1
IP_115791.1	IP_147768.1
IP_116489.1	IP_147770.1
IP_119559.1	IP_147778.1
IP_120781.1	IP_147814.1
IP_121792.1	IP_147841.1
IP_128291.1	IP_147867.1
IP_130676.1	IP_147898.1
IP_131287.1	IP_148070.1
IP_132331.1	IP_148117.1
IP_132858.1	IP_148196.1
IP_134576.1	IP_148215.1
IP_139015.1	IP_148258.1
IP_139024.1	IP_148370.1
IP_151340.1	IP_148391.1
IP_152961.1	IP_148395.1
IP_158063.1	IP_148397.1
IP_158502.1	IP_148457.1
IP_164889.1	IP_148587.1
IP_171622.1	IP_148703.1
IP_178662.1	IP_148766.1
IP_178655.1	IP_148855.1
IP_187035.1	IP_148865.1
IP_192592.1	IP_148960.1
IP_194600.1	IP_148971.1
IP_195829.1	IP_149019.1
IP_196441.1	IP_149113.1
IP_196834.1	IP_149121.1
IP_196917.1	IP_149143.1
IP_197986.1	IP_149147.1
IP_202077.1	IP_149167.1
IP_204848.1	IP_149189.1
IP_206419.1	IP_149202.1
IP_210997.1	IP_149212.1
IP_215111.1	IP_149235.1
IP_217528.1	IP_149265.1
IP_218171.1	IP_149341.1
IP_220209.1	IP_149346.1
IP_221388.1	IP_149378.1
IP_222076.1	IP_149473.1
IP_224762.1	IP_149487.1
IP_225504.1	IP_149550.1
IP_225941.1	IP_149596.1
IP_226783.1	IP_149674.1
IP_236469.1	IP_149761.1
IP_239159.1	IP_149772.1
IP_246026.1	IP_149839.1
IP_249626.1	IP_149981.1
IP_250256.1	IP_150001.1
IP_250984.1	IP_150018.1
IP_254225.1	IP_150068.1
IP_254747.1	IP_150170.1
IP_256958.1	IP_150176.1
IP_257774.1	IP_150253.1
IP_257788.1	IP_150270.1
IP_257785.1	IP_150376.1
IP_261804.1	IP_150419.1
IP_261811.1	IP_150475.1
IP_265136.1	IP_150607.1
IP_265943.1	IP_150669.1
IP_272354.1	IP_150699.1
IP_273416.1	IP_150703.1
IP_274181.1	IP_150733.1
IP_274684.1	IP_150735.1
IP_277789.1	IP_150886.1
IP_277793.1	IP_151070.1
IP_278187.1	IP_151152.1
IP_283954.1	IP_151171.1
IP_284256.1	IP_151255.1
IP_284494.1	IP_151401.1
IP_284510.1	IP_151402.1
IP_287998.1	IP_151404.1
IP_288621.1	IP_151455.1
IP_290017.1	IP_151466.1
IP_294264.1	IP_151485.1
IP_057671.1	IP_151489.1
IP_061939.1	IP_151508.1
IP_062548.1	IP_151581.1
IP_066735.1	IP_151707.1
IP_068384.1	IP_151715.1
IP_069270.1	IP_151742.1
IP_070208.1	IP_151780.1
IP_070922.1	IP_151788.1
IP_070931.1	IP_151805.1
IP_070949.1	IP_151845.1
IP_070956.1	IP_151852.1
IP_072827.1	IP_151861.1
IP_073380.1	IP_151891.1
IP_074568.1	IP_151897.1
IP_075797.1	IP_151969.1
IP_077079.1	IP_152120.1
IP_077084.1	IP_152122.1
IP_077091.1	IP_152124.1
IP_077087.1	IP_152229.1
IP_078066.1	IP_152259.1
IP_079725.1	IP_152320.1
IP_082841.1	IP_152360.1
IP_083504.1	IP_152396.1
IP_086782.1	IP_152452.1
IP_086894.1	IP_152453.1
IP_087278.1	IP_152544.1
IP_093736.1	IP_152589.1
IP_097779.1	IP_152641.1
IP_097788.1	IP_152661.1
IP_097793.1	IP_152707.1
IP_101537.1	IP_152754.1
IP_101892.1	IP_152917.1
IP_103789.1	IP_152922.1
IP_104946.1	IP_152948.1
IP_109115.1	IP_152972.1
IP_109685.1	IP_152978.1
IP_109694.1	IP_153001.1
IP_112112.1	IP_153010.1
IP_115391.1	IP_153028.1
IP_116487.1	IP_153067.1
IP_117892.1	IP_153317.1
IP_117893.1	IP_153349.1
IP_123676.1	IP_153389.1
IP_126276.1	IP_153392.1
IP_127977.1	IP_153421.1
IP_129268.1	IP_153424.1
IP_133611.1	IP_153484.1
IP_134745.1	IP_153542.1
IP_134744.1	IP_153546.1
IP_138593.1	IP_153630.1
IP_139002.1	IP_153688.1
IP_139018.1	IP_153758.1
IP_139137.1	IP_153831.1
IP_139354.1	IP_153846.1
IP_139870.1	IP_153860.1
IP_139873.1	IP_153898.1
IP_139875.1	IP_153908.1
IP_140042.1	IP_153935.1
IP_144177.1	IP_154121.1
IP_145939.1	IP_154127.1
IP_147290.1	IP_154163.1
IP_151338.1	IP_154170.1
IP_152155.1	IP_154194.1
IP_155177.1	IP_154244.1
IP_155286.1	IP_154527.1
IP_163008.1	IP_154583.1
IP_163587.1	IP_154592.1
IP_163585.1	IP_154604.1
IP_168197.1	IP_154636.1
IP_174193.1	IP_154639.1
IP_174326.1	IP_154664.1
IP_175127.1	IP_154673.1
IP_176768.1	IP_154726.1
IP_176920.1	IP_154729.1
IP_178255.1	IP_154732.1
IP_180072.1	IP_154741.1
IP_181715.1	IP_154829.1
IP_182326.1	IP_154872.1
IP_182343.1	IP_155026.1
IP_184125.1	IP_155064.1
IP_184623.1	IP_155097.1
IP_188820.1	IP_155115.1
IP_189836.1	IP_155123.1
IP_195848.1	IP_155244.1
IP_195849.1	IP_155299.1
IP_195851.1	IP_155321.1
IP_196343.1	IP_155330.1
IP_196655.1	IP_155428.1
IP_196835.1	IP_155491.1
IP_196902.1	IP_155501.1
IP_196952.1	IP_155548.1
IP_196961.1	IP_155729.1
IP_198900.1	IP_155756.1
IP_204796.1	IP_155809.1
IP_206000.1	IP_155832.1
IP_208905.1	IP_156023.1
IP_210821.1	IP_156031.1
IP_212193.1	IP_156084.1
IP_212603.1	IP_156295.1
IP_215014.1	IP_156405.1
IP_223294.1	IP_156474.1
IP_223290.1	IP_156556.1
IP_224074.1	IP_156581.1
IP_235653.1	IP_156589.1
IP_236014.1	IP_156613.1
IP_236238.1	IP_156721.1
IP_236909.1	IP_156723.1
IP_237484.1	IP_156795.1
IP_237493.1	IP_156809.1
IP_238425.1	IP_156832.1
IP_241875.1	IP_156842.1
IP_241889.1	IP_156856.1
IP_242705.1	IP_156963.1
IP_242720.1	IP_157056.1
IP_243557.1	IP_157067.1
IP_244422.1	IP_157070.1
IP_246113.1	IP_157091.1
IP_246121.1	IP_157220.1
IP_249475.1	IP_157229.1
IP_250390.1	IP_157322.1
IP_251192.1	IP_157371.1
IP_255457.1	IP_157416.1
IP_256570.1	IP_157419.1
IP_256960.1	IP_157435.1
IP_257146.1	IP_157442.1
IP_257147.1	IP_157489.1
IP_257148.1	IP_157534.1
IP_257283.1	IP_157536.1
IP_257855.1	IP_157684.1
IP_257868.1	IP_157689.1
IP_258438.1	IP_157731.1
IP_258435.1	IP_157746.1
IP_259484.1	IP_157775.1
IP_259665.1	IP_157824.1
IP_261494.1	IP_157841.1
IP_267686.1	IP_157968.1
IP_269625.1	IP_157971.1
IP_271116.1	IP_157974.1
IP_273350.1	IP_158078.1
IP_273403.1	IP_158116.1
IP_273405.1	IP_158125.1
IP_278969.1	IP_158272.1
IP_279090.1	IP_158290.1
IP_280648.1	IP_158350.1
IP_281603.1	IP_158456.1
IP_281604.1	IP_158529.1
IP_281976.1	IP_158542.1
IP_283191.1	IP_158559.1
IP_284407.1	IP_158593.1
IP_285464.1	IP_158621.1
IP_293631.1	IP_158631.1
IP_293761.1	IP_158768.1
IP_294409.1	IP_158839.1
IP_057672.1	IP_158918.1
IP_059854.1	IP_158921.1
IP_061363.1	IP_158932.1
IP_061368.1	IP_158946.1
IP_061811.1	IP_158972.1
IP_062048.1	IP_159049.1
IP_064049.1	IP_159079.1
IP_068595.1	IP_159187.1
IP_068722.1	IP_159216.1
IP_070161.1	IP_159231.1
IP_071482.1	IP_159238.1
IP_072526.1	IP_159383.1
IP_078105.1	IP_159386.1
IP_079722.1	IP_159407.1
IP_083079.1	IP_159471.1
IP_083429.1	IP_159475.1
IP_083435.1	IP_159492.1
IP_085821.1	IP_159567.1
IP_087301.1	IP_159673.1
IP_087912.1	IP_159685.1
IP_093824.1	IP_159690.1
IP_095954.1	IP_159712.1
IP_097097.1	IP_159747.1
IP_110793.1	IP_159833.1
IP_110808.1	IP_159865.1
IP_110829.1	IP_159926.1
IP_113193.1	IP_159935.1
IP_115490.1	IP_160034.1
IP_127217.1	IP_160055.1
IP_130066.1	IP_160077.1
IP_130223.1	IP_160155.1
IP_130523.1	IP_160189.1
IP_130678.1	IP_160212.1
IP_131289.1	IP_160287.1
IP_131555.1	IP_160317.1
IP_135160.1	IP_160369.1
IP_137650.1	IP_160497.1
IP_138992.1	IP_160610.1
IP_138993.1	IP_160651.1
IP_141181.1	IP_160681.1
IP_147296.1	IP_160756.1
IP_148023.1	IP_160757.1
IP_155870.1	IP_160767.1
IP_155973.1	IP_160800.1
IP_156428.1	IP_160841.1
IP_158217.1	IP_160855.1
IP_159425.1	IP_160856.1
IP_159426.1	IP_160890.1
IP_159834.1	IP_161111.1
IP_161439.1	IP_161249.1
IP_161443.1	IP_161255.1
IP_162227.1	IP_161256.1
IP_162582.1	IP_161283.1
[truncated: 10,617 more rows]
