# Supplementary material for: Deep transcriptome annotation enables the discovery and functional characterization of cryptic small proteins
Source: eLife journal article supplement (doi:10.7554/elife.27860), 2017-10-30
Supplement: supp [file elife-27860-supp-v1.zip › elife_poa_e27860_Figure_8_figure_supplement_1_source_data_1.xlsx]

## Sheet: Feuil1
	chimpanzee	Alternative proteins	Reference proteins				chimpanzee	AltProt	RefProt
	#Proteins with at least 1 InterPro entry	35869	40039				Signal peptide	4279	4494
	#Proteins with no InterPro signature	125794	1735				Transmembrane	10095	8441
							Signal peptide + Transmembrane	73	1814
	mouse	Alternative proteins	Reference proteins
	#Proteins with at least 1 InterPro entry	45846	52552				mouse	AltProt	RefProt
	#Proteins with no InterPro signature	169626	1021				Signal peptide	6494	6228
							Transmembrane	13094	12005
	Bos-taurus	Alternative proteins	Reference proteins				Signal peptide + Transmembrane	121	2485
	#Proteins with at least 1 InterPro entry	19020	22683
	#Proteins with no InterPro signature	76995	936				Bos-taurus	AltProt	RefProt
							Signal peptide	2267	3180
	drosphila	Alternative proteins	Reference proteins				Transmembrane	5013	5746
	#Proteins with at least 1 InterPro entry	11941	15200				Signal peptide + Transmembrane	29	1230
	#Proteins with no InterPro signature	59764	5795
							drosphila	AltProt	RefProt
	yeast	Alternative proteins	Reference proteins				Signal peptide	4872	3598
	#Proteins with at least 1 InterPro entry	2422	5147				Transmembrane	11931	8090
	#Proteins with no InterPro signature	7070	276				Signal peptide + Transmembrane	75	2539
							yeast	AltProt	RefProt
							Signal peptide	225	251
							Transmembrane	819	966
							Signal peptide + Transmembrane	3	91
