# Supplementary material for: Deep transcriptome annotation enables the discovery and functional characterization of cryptic small proteins
Source: eLife journal article supplement (doi:10.7554/elife.27860), 2017-10-30
Supplement: supp [file elife-27860-supp-v1.zip › elife_poa_e27860_Figure_9_source_data_1.xlsx]

## Sheet: Feuil1
	ToTal: 343 Altprots/192GO
	Molecular function:302 AltProts/94GO
	nucleic acid binding	154	50.9934
	catalytic activity	58	19.2053
	protein binding	43	14.2384
	nucleotide binding	27	8.9404
	hydrolase activity	23	7.61589
	DNA binding	22	7.28477
	structural molecule activity	17	5.62914
	transferase activity	17	5.62914
	peptidase activity	8	2.64901
	transporter activity	7	2.31788
	receptor binding	6	1.98675
	kinase activity	6	1.98675
	others	42	2.98675
	Biological process: 128 AltProts/64GO
	biosynthesis	41	32.0312
	nucleobase, nucleoside, nucleotide and nucleic acid metabolism	35	27.3438
	protein metabolism	25	19.5312
	transport	15	11.7188
	cell organization and biogenesis	12	9.375
	protein biosynthesis	11	8.59375
	cell communication	8	6.25
	carbohydrate metabolism	7	5.46875
	organelle organization and biogenesis	7	5.46875
	signal transduction	7	5.46875
	viral life cycle	6	4.6875
	protein modification	6	4.6875
	Others	34	26.5625
	Cellular component: 107AltProts/34GO
	intracellular	67	62.6168
	cytoplasm	28	26.1682
	ribosome	11	10.2804
	nucleus	10	9.34579
	extracellular	8	7.47664
	cytosol	6	5.60748
	cytoplasmic membrane-bound vesicle	5	4.6729
	plasma membrane	4	3.73832
	cytoskeleton	2	1.86916
	extracellular space	1	0.934579
	Golgi apparatus	1	0.934579
	microtubule organizing center	1	0.934579
	Others	4	3.73832
