# Supplementary material for: Deep transcriptome annotation enables the discovery and functional characterization of cryptic small proteins
Source: eLife journal article supplement (doi:10.7554/elife.27860), 2017-10-30
Supplement: supp [file elife-27860-supp-v1.zip › elife_poa_e27860_Figure_10_source_data_1.xlsx]

## Sheet: Feuil1
	FIGURE 11a
		Alternative proteins	Reference proteins
	IPR013087	92	1688
	IPR007087	37	1902
	IPR013544	37	0
	IPR001909	20	827
	IPR027417	15	1792
	IPR015880	15	1439
	IPR004244	10	1
	IPR029363	10	1
	IPR009057	9	662
	IPR005135	9	80
	Others	585	48599
	FIGURE 11b
	Nb_ZF	Nb_AltProt
	1	52
	2	21
	3	15
	4	6
	5	4
	6	1
	7	2
	8	1
	9	3
	10	1
	>10	4
