# Supplementary material for: Deep transcriptome annotation enables the discovery and functional characterization of cryptic small proteins
Source: eLife journal article supplement (doi:10.7554/elife.27860), 2017-10-30
Supplement: supp [file elife-27860-supp-v1.zip › elife_poa_e27860_Figure_11_figure_supplement_1.pdf]

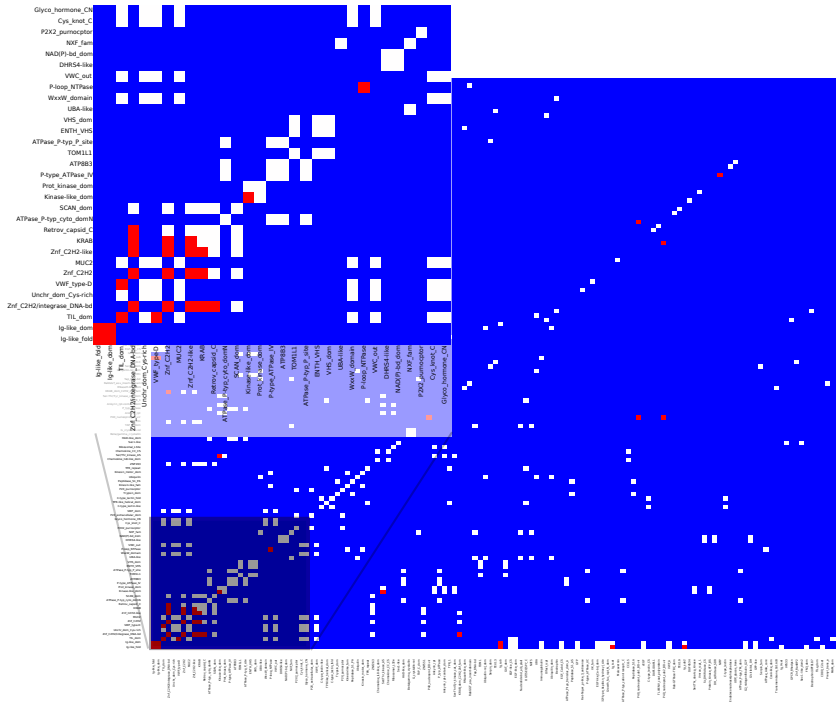

**Figure 11-figure supplement 1. Matrix of co-occurrence of InterPro entries between alternative/reference protein pairs coded by the same transcript.**

Pixels show the number of times entries co-occur in reference and alternative proteins. Blue pixels indicate that these domains do not co-occur, white pixels indicate that they co-occur once, and red that they co-occur twice or more.
