# Supplementary material for: Deep transcriptome annotation enables the discovery and functional characterization of cryptic small proteins
Source: eLife journal article supplement (doi:10.7554/elife.27860), 2017-10-30
Supplement: supp [file elife-27860-supp-v1.zip › elife_poa_e27860_Figure_11_figure_supplement_2.pdf]

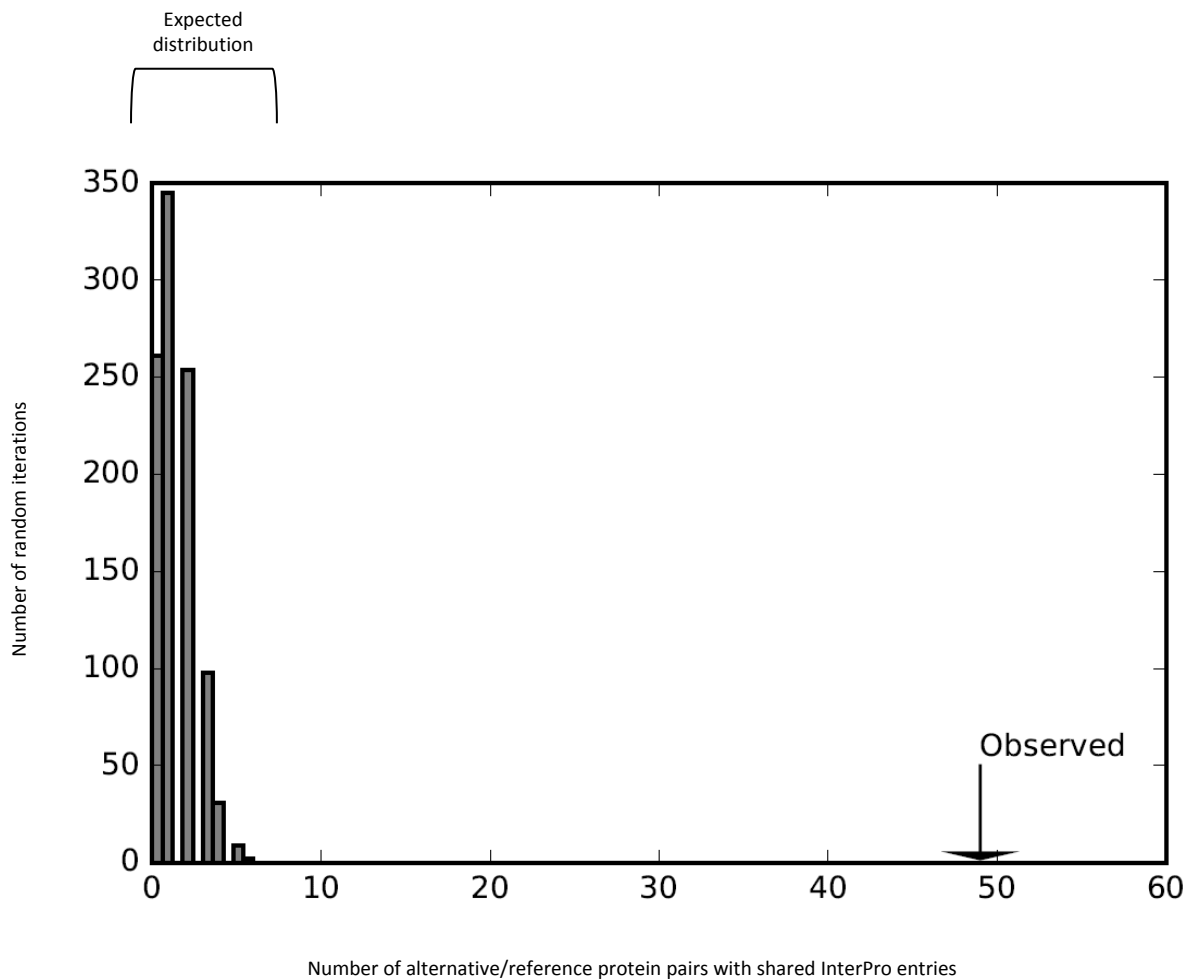

**Figure 11-figure supplement 2. Some reference and alternative proteins have identical functional domains.**

The number of reference/alternative protein pairs with identical domains ( $n = 49$ ) is higher than expected by chance alone ( $p < 0.001$ ). The distribution of expected pairs with identical domains and the observed number are shown. This is the same analysis as the one presented in figure 11b, with the zinc finger domains taken out.
