# Supplementary material for: Deep transcriptome annotation enables the discovery and functional characterization of cryptic small proteins
Source: eLife journal article supplement (doi:10.7554/elife.27860), 2017-10-30
Supplement: supp [file elife-27860-supp-v1.zip › elife_poa_e27860_Figure_11_figure_supplement_3.pdf]

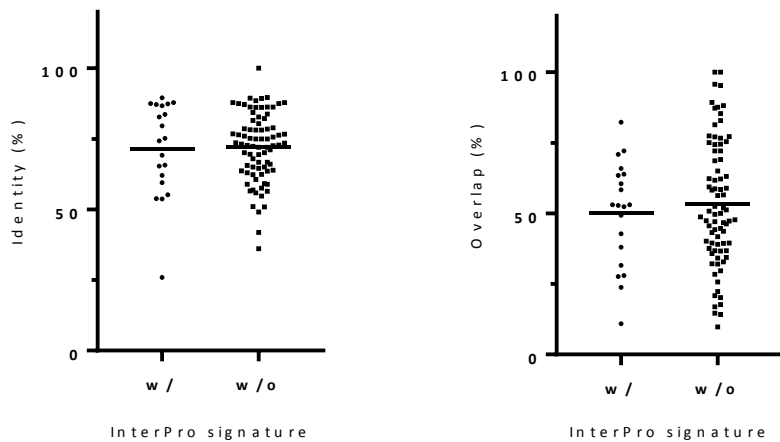

**Figure 11-figure supplement 3. Distribution of the percentage of sequence identity and overlap between alternative-reference protein pairs with (20) or without (80) identical Interpro signature.**

There is no significant differences between both groups (p-value=0.6272; Kolmogorov Smirnov test). We conclude that there is no significant association between identity/overlap and functional relationship.
