# Supplementary material for: Deep transcriptome annotation enables the discovery and functional characterization of cryptic small proteins
Source: eLife journal article supplement (doi:10.7554/elife.27860), 2017-10-30
Supplement: supp [file elife-27860-supp-v1.zip › elife_poa_e27860_Figure_11_source_data_1.xlsx]

## Sheet: Feuil1
									FIGURE 12b
									# alt/ref protein pairs with shared IP	#random iterations
									0	0
									1	0
FIGURE 12a									2	0
#shared IP	0	1	2	3	4				3	0
#alt/ref protein pairs	160	88	34	15	1				4	0
									5	0
									6	0
									7	0
									8	0
									9	0
									10	0
									11	0
									12	0
									13	0
									14	0
									15	0
									16	0
									17	0
									18	0
									19	0
									20	0
									21	0
									22	0
									23	0
									24	0
									25	1
									26	3
									27	2
									28	14
									29	17
									30	23
									31	55
									32	71
									33	71
									34	78
									35	100
									36	99
									37	122
									38	66
									39	75
									40	63
									41	52
									42	33
									43	21
									44	11
									45	11
									46	7
									47	1
									48	2
									49	2
									50	0
									51	0
									52	0
									53	0
									54	0
									55	0
									56	0
									57	0
									58	0
									59	0
									60	0
									61	0
									62	0
									63	0
									64	0
									65	0
									66	0
									67	0
									68	0
									69	0
									70	0
									71	0
									72	0
									73	0
									74	0
									75	0
									76	0
									77	0
									78	0
									79	0
									80	0
									81	0
									82	0
									83	0
									84	0
									85	0
									86	0
									87	0
									88	0
									89	0
									90	0
									91	0
									92	0
									93	0
									94	0
									95	0
									96	0
									97	0
									98	0
									99	0
									100	0
									101	0
									102	0
									103	0
									104	0
									105	0
									106	0
									107	0
									108	0
									109	0
									110	0
									111	0
									112	0
									113	0
									114	0
									115	0
									116	0
									117	0
									118	0
									119	0
									120	0
									121	0
									122	0
									123	0
									124	0
									125	0
									126	0
									127	0
									128	0
									129	0
									130	0
									131	0
									132	0
									133	0
									134	0
									135	0
									136	0
									137	0
									138	0
									139	0
									140	0
									141	0
									142	0
									143	0
									144	0
									145	0
									146	0
									147	0
									148	0
									149	0
									150	0
									151	0
									152	0
									153	0
									154	0
									155	0
									156	0
									157	0
									158	0
									159	0
									160	0
