# Supplementary material for: Deep transcriptome annotation enables the discovery and functional characterization of cryptic small proteins
Source: eLife journal article supplement (doi:10.7554/elife.27860), 2017-10-30
Supplement: supp [file elife-27860-supp-v1.zip › elife_poa_e27860_Figure_12_figure_supplement_2.pdf]

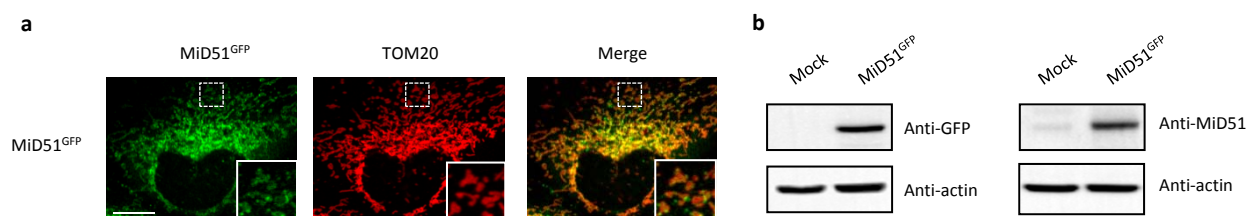

**Figure 12-figure supplement 2. MiD51 expression results in mitochondrial fission.**

(a) Confocal microscopy of HeLa cells transfected with MiD51<sup>GFP</sup> immunostained with anti-TOM20 (red channel) monoclonal antibodies. In each image, boxed areas are shown at higher magnification in the bottom right corner. The localization of MiD51 in fission sites is shown in merged higher magnification inset. Scale bar, 10  $\mu$ m. (b) Human HeLa cells transfected with empty vector (mock) or MiD51<sup>GFP</sup> were lysed and analyzed by western blot to confirm MiD51<sup>GFP</sup> expression.
