# Supplementary material for: Deep transcriptome annotation enables the discovery and functional characterization of cryptic small proteins
Source: eLife journal article supplement (doi:10.7554/elife.27860), 2017-10-30
Supplement: supp [file elife-27860-supp-v1.zip › elife_poa_e27860_Figure_12_figure_supplement_3.pdf]

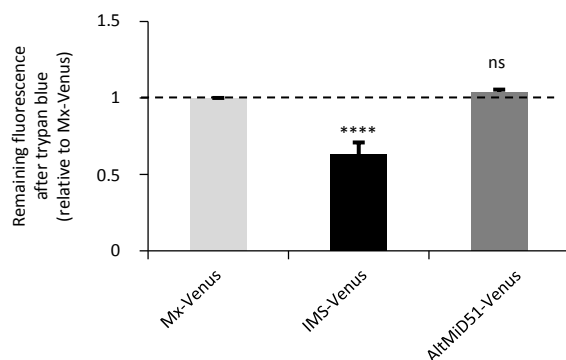

**Figure 12-figure supplement 3. AltMiD51 is localized in the mitochondrial matrix.**

Trypan blue quenching experiment performed on HeLa cells stably expressing the indicated constructs: Matrix-Venus (Mx-Venus) and Intermembrane space-Venus (IMS-Venus). The fluorescence remaining after quenching by trypan blue is shown relative to Mx-Venus indicated by the dashed line. (\*\*\*\*  $p < 0.0001$ , one-way ANOVA). The absence of quenching of the fluorescence compared to IMS-Venus indicates the matricial localization of altMiD51.  $n \geq 3$  cells were quantified per experiment, and results are from 6 independent experiments. Data are mean  $\pm$  SEM.
