# Supplementary material for: Deep transcriptome annotation enables the discovery and functional characterization of cryptic small proteins
Source: eLife journal article supplement (doi:10.7554/elife.27860), 2017-10-30
Supplement: supp [file elife-27860-supp-v1.zip › elife_poa_e27860_Figure_12_figure_supplement_5.pdf]

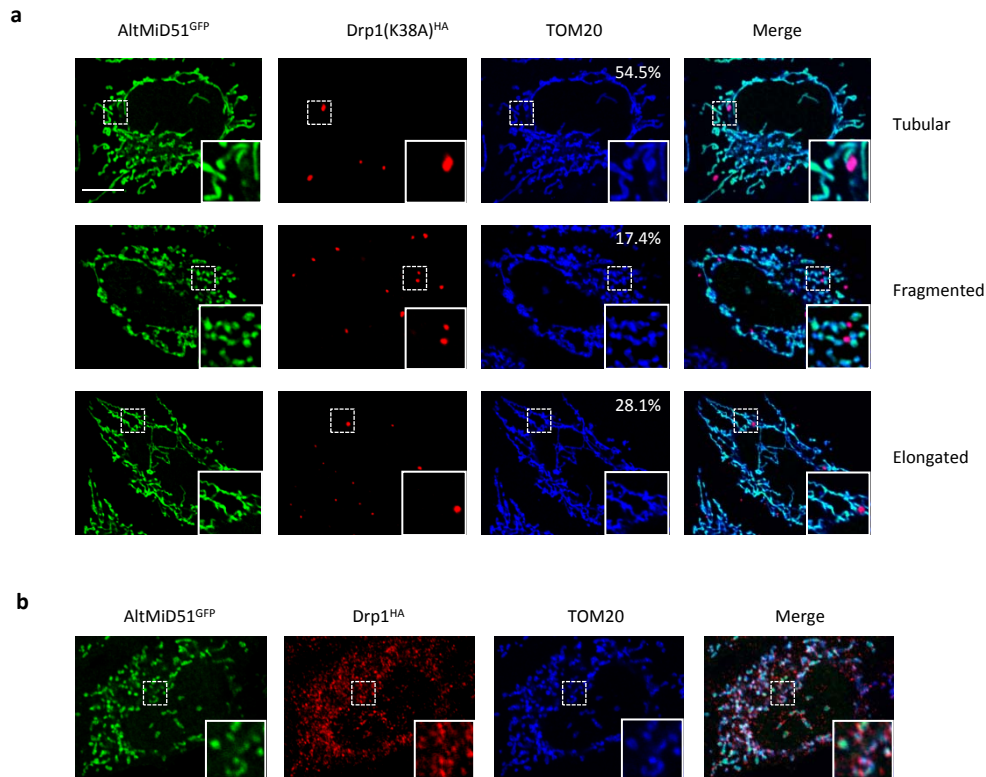

**Figure 12-figure supplement 5. Representative confocal images of cells co-expressing altMiD51<sup>GFP</sup> and Drp1(K38A)<sup>HA</sup>.**

(a) Confocal microscopy of HeLa cells co-transfected with altMiD51<sup>GFP</sup> and Drp1(K38A)<sup>HA</sup> immunostained with anti-TOM20 (blue channel) and anti-HA (red channel) monoclonal antibodies. In each image, boxed areas are shown at higher magnification in the bottom right corner. % of cells with the indicated morphology is indicated on the TOM20 panels. (b) Confocal microscopy of HeLa cells co-transfected with altMiD51<sup>GFP</sup> and Drp1(wt)<sup>HA</sup> immunostained with anti-TOM20 (blue channel) and anti-HA (red channel) monoclonal antibodies. In each image, boxed areas are shown at higher magnification in the bottom right corner. Scale bar, 10  $\mu$ m.
