# Supplementary material for: Deep transcriptome annotation enables the discovery and functional characterization of cryptic small proteins
Source: eLife journal article supplement (doi:10.7554/elife.27860), 2017-10-30
Supplement: supp [file elife-27860-supp-v1.zip › elife_poa_e27860_Figure_12_figure_supplement_6.pdf]

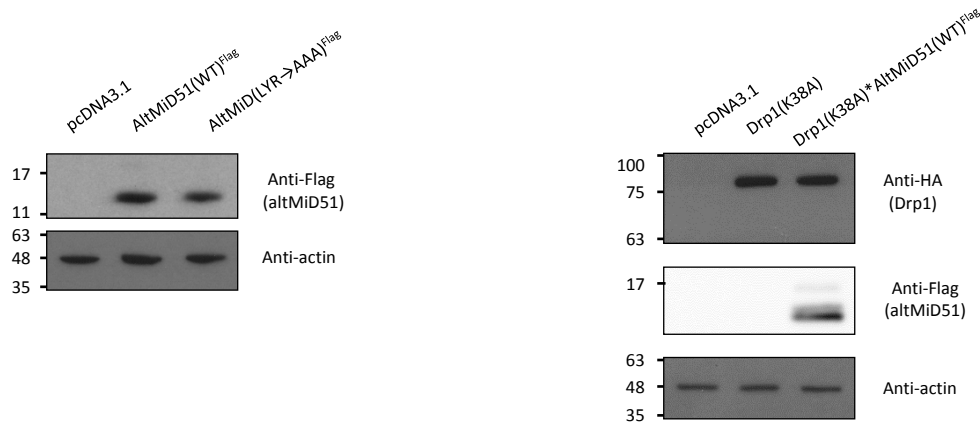

**Figure 12-figure supplement 6. Protein immunoblot showing the expression of different constructs in HeLa cells.**

HeLa cells were transfected with empty vector (pcDNA3.1), altMiD51(WT)<sup>Flag</sup>, altMiD51(LYR→AAA)<sup>Flag</sup>, Drp1(K38A)<sup>HA</sup>, or Drp1(K38A)<sup>HA</sup> and altMiD51(WT)<sup>Flag</sup>, as indicated. Proteins were extracted and analyzed by western blot with antibodies against the Flag tag (altMiD51), the HA tag (Drp1K38A) or actin, as indicated. Molecular weight markers are shown on the left (kDa). Representative experiment of three independent biological replicates.
