# Supplementary material for: Deep transcriptome annotation enables the discovery and functional characterization of cryptic small proteins
Source: eLife journal article supplement (doi:10.7554/elife.27860), 2017-10-30
Supplement: supp [file elife-27860-supp-v1.zip › elife_poa_e27860_Figure_12_source_data_1.xlsx]

## Sheet: Feuil1
	FIGURE 13d
		NT	AltMiD51-2xflag	AltMiD51(AAA)-2xflag	Drp1(K38A)-HA	Drp1(K38A)-HA + AltMiD51-2F
	Tubular	92.5885	34.1872	65.1553	11.6628	54.5154
	Fragmented	5.44928	65.4794	27.5652	0	17.389
	Elongated	1.96226	0.333333	5.36683	88.3372	28.0956
