# Supplementary material for: Deep transcriptome annotation enables the discovery and functional characterization of cryptic small proteins
Source: eLife journal article supplement (doi:10.7554/elife.27860), 2017-10-30
Supplement: supp [file elife-27860-supp-v1.zip › elife_poa_e27860_Figure_13_source_data_1.xlsx]

## Sheet: Feuil1
	FIGURE 14a
		NT	AltMiD51-2xflag	SiRNA Drp1	SiRNA Drp1 + AltMiD51-2F
	tubular	95.4	32.24	8	34.9
	fragmented	2.3	67.76	0	33.86
	Elongated	2.3	0	92	31.24
