# Supplementary material for: Deep transcriptome annotation enables the discovery and functional characterization of cryptic small proteins
Source: eLife journal article supplement (doi:10.7554/elife.27860), 2017-10-30
Supplement: supp [file elife-27860-supp-v1.zip › elife_poa_e27860_Figure_14_figure_supplement_1.pdf]

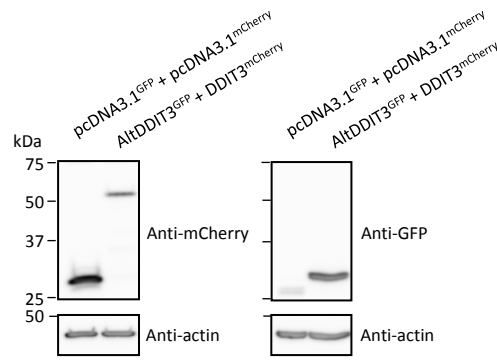

**Figure 14-figure supplement 1. Protein immunoblot showing the expression of different constructs in HeLa cells.**

HeLa cells were co-transfected with GFP and mCherry, or altDDIT3<sup>GFP</sup> and DDIT3<sup>mCherry</sup>, as indicated. Proteins were extracted and analyzed by western blot with antibodies, as indicated. Molecular weight markers are shown on the left (kDa). AltDDIT3 has a predicted molecular weight of 4.28 kDa and thus migrates at its expected molecular weight when tagged with GFP (~32 kDa). Representative experiment of two independent biological replicates.
