# Supplementary material for: Deep transcriptome annotation enables the discovery and functional characterization of cryptic small proteins
Source: eLife journal article supplement (doi:10.7554/elife.27860), 2017-10-30
Supplement: supp [file elife-27860-supp-v1.zip › elife_poa_e27860_Figure_14_figure_supplement_2.pdf]

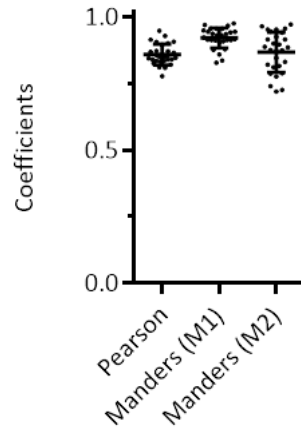

**Figure 14—figure supplement 2. Colocalization of altDDIT3 with DDIT3.**

Scatter plots of Pearson's Correlation Coefficient and Manders' Correlation Coefficient after Costes' automatic threshold ( $p$ -value < 0.001, based on 1000 rounds of Costes' randomization colocalization analysis). M1 is the proportion of altDDIT3<sup>GFP</sup> signal overlapping DDIT3<sup>mCherry</sup> signal and M2 is the proportion of DDIT3<sup>mCherry</sup> signal overlapping altDDIT3<sup>GFP</sup>. Error bars represent the mean  $\pm$  SD of three independent experiments (28 cells).
