# Supplementary material for: Deep transcriptome annotation enables the discovery and functional characterization of cryptic small proteins
Source: eLife journal article supplement (doi:10.7554/elife.27860), 2017-10-30
Supplement: supp [file elife-27860-supp-v1.zip › elife_poa_e27860_Supplementary_File_3.xlsx]

## Sheet: Info
This file shows MS-based proteomics data for alternative and reference proteins from the three following dataset:
PXD000612: K. Sharma et al., (2014) Ultradeep Human Phosphoproteome Reveals a Distinct Regulatory Nature of Tyr and Ser/Thr-Based Signaling. Cell Rep. 8, 1583–1594

## Sheet: Detected alternative proteins
		Number of phosphopeptide MS/MS spectra
Accession	Gene	Control	EGF	Mitosis	Total	Sequence(s)
IP_182429.1, IP_182439.1	CREM	25	6	2	33	MSGEPSCSAGSPEQEAYRGT ; MSGEPSCSAGSPEQEAYR
IP_296449.1	PCAT14	5	23	2	30	LASLQVYPAAPK
IP_150253.1	C1GALT1	7	3	6	16	VIWVLPLTLFSKTTTKNK
IP_279899.1	PEG3	5	4	2	11	FILERTSLK
IP_305449.1	LOC550643	0	0	10	10	WDYPEGTPNGGSTTLPSAPPPASAGLK
IP_127477.1	GAPT	1	3	0	4	NVATAFYYLASYENVLNSHLNEKK
IP_138630.1	PRR3	3	1	5	9	EAESSPATDTAAAPAAR
IP_179943.1	RP11-508N12.2	7	0	1	8	IHHLCLPPGGGNTPSRK
IP_083317.1	ATAD2B	3	4	0	7	VECASGWGTGGSRGGTQIYK
IP_260551.1	CYGB	6	1	0	7	GNPTAAQRTWAWR
IP_113787.1	LOC102724231	5	1	0	6	ADAPAVSPESPQK
IP_162494.1	DOCK5	4	2	0	6	MSQIFLCYLDICGKAESFLTVK
IP_209734.1	LIMA1	0	0	6	6	RNLLLYVLLSK
IP_254133.1, IP_254381.1, IP_256949.1	NA	1	4	0	5	MFLILYLK
IP_273606.1	USF2	5	0	1	6	GEEPSTTKWSGGGGTR
IP_071882.1	CCT3	0	0	5	5	LGGSPQSLSVPAQFSK
IP_147867.1	PDCD2	1	3	1	5	QAAPKTTLR
IP_160651.1	NDUFB2-AS1	0	0	5	5	TALHTVSHLPSEVSPSPSGQR
IP_214136.1	STAB2	0	5	0	5	SPAAARRDTK
IP_277061.1	CRX	2	1	2	5	MQAAATAAETAAAAPR
IP_074695.1	CACNA1E	0	3	1	4	KNCPKTSVKAK
IP_084360.1	SPAST	2	1	1	4	QQPGASQASAPLPGPRPSR
IP_134919.1	ZNF879	3	1	0	4	NLINVMTVRKPSTK
IP_146050.1	VTA1	4	0	0	4	HKGQQALAHGLATCYVNK
IP_184126.1	DDX21	4	0	0	4	AVEAREDSDQEVATK
IP_197194.1	STIP1	1	2	1	4	GLSPGHEALYR
IP_254515.1	MLLT6	0	3	1	4	LSTSPVPK
IP_302877.1	DOCK11	0	3	1	4	ITTKIQSSMMRLK
IP_088423.1	AFF3	2	0	0	2	AAAAAAAAAAAAPPATQRAAPDLTR
IP_145715.1	AHI1	3	0	0	3	KSLPINTVRNCK
IP_146182.1	PHACTR2	0	2	0	2	RTLKTTLK
IP_206831.1	CLEC2D	3	0	0	3	NFFWMTDQEAIQDLWQWRK
IP_237976.1	LRRK1	1	2	0	3	MSSLSSCACPCMRPSSQGMK
IP_243010.1	SH2B1	1	2	0	3	ISSGRTLWWDPSTSPAASVVAFRCNWR
IP_253195.1	PHF12	0	0	3	3	GADGANPSSAGSPQDGR
IP_268500.1	CACTIN	0	0	3	3	SGGSAQGCEAGAPR
IP_278564.1	ZNF808	0	3	0	3	IVTKSSVTLQQLQIIGESMMKR
IP_287081.1	PTK6	3	0	0	3	MTTISPTSGRPLK
IP_074871.1	SMG7	1	0	0	1	GRQMGEANGNFSVLFSSLGNKIGIH
IP_103203.1	KIF15	0	0	2	2	KIFVGGITEDTEEHHLR
IP_122631.1	MND1	2	0	0	2	LADVKRPSK
IP_131178.1	KIF20A	0	0	2	2	SSHGPEVGQLLS
IP_139870.1, IP_139871.1, IP_139875.1, IP_139877.1	NA	0	0	2	2	MPLLDVKT
IP_181567.1	MALRD1	0	1	1	2	MMGSQLLMTSDLK
IP_182132.1	SVIL	0	1	1	2	MTNLFLMTTTGGKFR
IP_191231.1	LINC01168	0	0	2	2	PVLSSSRLVNSLLLLNCHRMGLMR
IP_191523.1, IP_191524.1, IP_191527.1, IP_191530.1	NA	0	0	2	2	ATPGHTGCLSPGCPDQPAR
IP_192817.1	RIC3	0	2	0	2	RLTQFMTFQTVSSVGKK
IP_197601.1	TM7SF2	1	1	0	2	SPWGCPWPLSSASSMLLVTTSSVGR
IP_198554.1	SUV420H1	1	1	0	2	KKTMQVSK
IP_209112.1	SENP1	2	0	0	2	EVTVGCLPANMLTVLPK
IP_222571.1	LINC00330	0	0	2	2	SKKASSSPKTSK
IP_229835.1, IP_229850.1	NA	0	1	1	2	MTTASSAPPSRSCGHTLKACR
IP_234228.1	LACTB	2	0	0	2	KDIWEINIDTMLLLNLQTLLKFCQLFQ
IP_261033.1	RBFOX3	1	1	0	2	GPWEGQGMGKPGPAPSLLPR
IP_276333.1	NKPD1	1	1	0	2	SLCYVVQAVAKLLVTVSSRGAAMR
IP_285614.1	ZMYND8	0	2	0	2	RRPSFTAVGTPATVTTPASKPTGLST
IP_290786.1	LINC00649	0	0	2	2	EKMQHVPSEQELK
IP_298403.1	PDK3	0	2	0	2	TLHLVIIASDVFSPSR
IP_131513.1, L0R6Q1	SLC35A4	1	0	1	2	RVEDEVNSGVGQDGSLLSSPFLK
IP_057611.1	SLC35E2B	0	0	1	1	APGPSAMPAAETASGSRVCFCALPGR
IP_057741.1	C1CDS86	0	0	1	1	MSPSIGLDTDK
IP_058597.1	CLSTN1	0	1	0	1	PTAPLSSAR
IP_061364.1	RPA2	0	1	0	1	YSHMFNKTVLL
IP_062441.1	C1CDS216	0	1	0	1	YQFPNKPSLHWK
IP_064398.1	CYP4B1	1	0	0	1	KLGRVSPLTSSAMWVTWR
IP_064618.1	CDKN2C	0	0	1	1	VAPGAEAAERSPR
IP_065012.1	YIPF1	0	0	1	1	APPSGHLNTTK
IP_066090.1	FPGT	0	1	0	1	KNTIKHDTAFFVT
IP_067595.1	SLC25A24	1	0	0	1	RYPLALEGKWYK
IP_068342.1	MOV10	0	1	0	1	MTLTGKYSWSSVK
IP_068621.1	SYCP1	1	0	0	1	EFNGTGEGNGLSFQASVAAGGR
IP_069309.1	ITGA10	1	0	0	1	EGGGKATRDILYNSK
IP_070342.1, IP_070356.1, IP_070359.1	NA	1	0	0	1	CLSPLATSSQPKSLLTEPPIK
IP_071339.1	TRIM46	1	0	0	1	SQWALSLRGKSPLGASPSWTEPSR
IP_071851.1	SMG5	0	1	0	1	GCSLRPPPPFLSKGGLK
IP_074915.1	RGL1	0	1	0	1	ASQKISWQSS
IP_074978.1	C1CDS21	1	0	0	1	MFLSFGVVTLKGLNISHTAACR
IP_075601.1	CAMSAP2	0	0	1	1	MYLLKNMMEKVIK
IP_078066.1	CAPN2	0	0	1	1	RYSRYLSSWIPR
IP_078193.1	DNAH14	1	0	0	1	QIQNSMLLNAQFTR
IP_079312.1	EDARADD	0	1	0	1	AAVPSGASTGIYEVLELQDNDK
IP_080993.1	RP11-170N11.1	1	0	0	1	TSSVARPRSSKTLPK
IP_081055.1	RP11-76N22.2	1	0	0	1	KQTRSIQK
IP_081130.1	RP11-286B14.1	0	1	0	1	MLLDVHSALVFNK
IP_082004.1	LOC101929385	0	0	1	1	EEPDGGFWGLWASR
IP_083300.1	KLHL29	0	0	1	1	SSSPLDETEAPR
IP_083596.1	GAREML	1	0	0	1	MVASLCSSVRTSWQMTSTSPSCR
IP_085694.1	PAPOLG	1	0	0	1	KSYVFSEYFCMYCK
IP_087893.1	CIAO1	0	1	0	1	RMSMNVSVFSTPTHR
IP_088013.1	FER1L5	0	0	1	1	MAMGSGQTVQGPPEAGHPAPQLALHLLHLQ
IP_088791.1	FHL2	1	0	0	1	MPRSVLGAPTPSADLVAQNTSPLR
IP_088994.1	SH3RF3	0	1	0	1	QPARASHPRPECGPHAR
IP_090177.1, IP_090376.1	NA	1	0	0	1	ISSSCSGTLT
IP_090293.1, IP_090314.1, IP_090316.1	NA	0	0	1	1	SWASKLGTSSK
IP_091801.1	SCN7A	0	0	1	1	MKMKPCTTELETHIIFEK
IP_092672.1	TTN	1	0	0	1	MSMNSMSWLK
IP_093765.1	SPATS2L	1	0	0	1	ATAATNTEDSRTTASGPKTK
IP_093883.1	CFLAR	0	1	0	1	SSTLLIIR
IP_094329.1	RAPH1	0	0	1	1	VTILKVFTDTHLSCK
IP_094555.1	FASTKD2	0	1	0	1	KSPMKMFLPR
IP_098030.1	RNF144A-AS1	0	1	0	1	PKMTSKAPAAGGGAWTR
IP_099012.1	LINC00116	0	1	0	1	TQPTFLFLK
IP_099544.1	SCHLAP1	1	0	0	1	ELNQSPVNISTGTS
IP_100340.1	SETD5	0	0	1	1	DPQPELHLPLTK
IP_101471.1	EFHB	1	0	0	1	NMELVISSIIDFRMNIFEAR
IP_102266.1	VILL	1	0	0	1	MERGSQHPPQGFSK
IP_105004.1	IQCF5	0	0	1	1	TNLIFNLKSLWAYR
IP_105020.1	PARP3	1	0	0	1	RPRTTGQSGTTLCLTRASTHLSK
IP_106820.1	MINA	1	0	0	1	MVATPVTSARKVWRLSK
IP_106959.1	TMEM45A	0	1	0	1	PYLWRPLSSTTTLMAGK
IP_110032.1	C3CDS72	0	0	1	1	MSPPTPFCPK
IP_112181.1	DVL3	0	1	0	1	GPPLGPWLSRTSTR
IP_115860.1	RGS12	1	0	0	1	MRRALGLGSSSECLELGRPPNAHCLGR
IP_116983.1	SEL1L3	1	0	0	1	MKLPEAMQQLSNDWPRCCSGGSK
IP_117176.1	PGM2	0	1	0	1	TCCPAPSPPK
IP_117869.1	FRYL	0	1	0	1	MVISTVRLEEMGNQK
IP_117895.1	OCIAD1	1	0	0	1	TSCGCSTPPPPR
IP_119528.1	PRKG2	1	0	0	1	MTKEITSLER
IP_122808.1	GUCY1A3	0	1	0	1	SMSAQQLTGSNYVK
IP_125007.1	LOC101928172	1	0	0	1	ESSQMMSAK
IP_125435.1	SLC12A7	0	0	1	1	AQPTATGAISASRRQMH
IP_127249.1	ESM1	0	0	1	1	RWTALNTVTAVSAKAAR
IP_130466.1	ACSL6	0	1	0	1	NIKAEGGKEGTLFPGK
IP_130922.1	C5CDS66	0	0	1	1	MYSLNLPNPIQDKATR
IP_134930.1	ZNF354C	0	1	0	1	GSTLERNCINVWNVGK
IP_135480.1	LOC100130744	1	0	0	1	CALTVTVGR
IP_139297.1	TNXB	0	1	0	1	MPPPTPSACPGWFPR
IP_139484.1	TAP2	1	0	0	1	YFPSYMNCIHSYR
IP_139566.1	COL11A2	0	1	0	1	RVLKGSQGSPACLAQTDPR
IP_141671.1	AARS2	0	1	0	1	SPPQTAR
IP_142393.1	DST	0	0	1	1	QIGGSPVIFWTIHR
IP_144326.1	ARMC2	0	1	0	1	ICTNSYYVK
IP_144511.1	CDK19	0	1	0	1	WDAAPTVTSTRRGGK
IP_147090.1	SYNJ2	0	1	0	1	YVLVND
IP_150018.1	TNRC18	1	0	0	1	WPPPCTPR
IP_152122.1	NUDCD3	1	0	0	1	EYGSAATGTVHLPVCQAQSMDKPHSR
IP_152589.1	COBL	1	0	0	1	QGRKYLPCTPLPMTSEK
IP_153067.1	CALN1	0	1	0	1	GARPPTSPPGKR
IP_153389.1, IP_153392.1, IP_153396.1	NA	0	1	0	1	SHQSRNPPMLGSGK
IP_154121.1	GTPBP10	0	1	0	1	RYWSKFTK
IP_154741.1	SMURF1	1	0	0	1	TTDLPRTAHSLSR
IP_155756.1	NAPEPLD	1	0	0	1	MKQARYVLLK
IP_159865.1	AC005022.1	1	0	0	1	KMPSLKAAIESSSYGILDTGLQK
IP_162981.1	KIF13B	0	1	0	1	LGMYLFIFIFSKSEIICEPQSSSACVGGPR
IP_166795.1	COL14A1	0	0	1	1	MSLAQTFPIPAPVLKPMK
IP_167495.1	KCNK9	0	1	0	1	TPSAPSLPPTTSTPSLTRSR
IP_168376.1	FOXH1	1	0	0	1	LGEGEPSGGSSLK
IP_174089.1	CCDC180 LOC100499484-C9CDS174	0	0	1	1	WPGGYCSGSRR
IP_177044.1	SPTAN1	1	0	0	1	YRGSTEMLMKPK
IP_179594.1	LOC102723932	0	0	1	1	MALATTSQKCVR
IP_180475.1	WDR37	0	0	1	1	MSLDLDKRPPAHR
IP_180878.1	GATA3	0	0	1	1	MLTGPPAR
IP_182171.1	KIAA1462	0	1	0	1	RPMYSTVFNTALTCTK
IP_183784.1	ARID5B	0	1	0	1	RSSCSPDSFSSLGLLSDK
IP_186830.1	C10CDS62	0	0	1	1	MKAGLNPTLAAFPK
IP_187843.1	NEURL1	1	0	0	1	APGERAGAAAPPTPSRNPSVPGSK
IP_190646.1	LOC101929021	0	1	0	1	RKESPTCLQCLLK
IP_191238.1	LINC01168	0	0	1	1	SLSPGDLLYSPTGTPK
IP_193939.1	HTATIP2	0	0	1	1	APSDGSAGSGAGDGRGAAPR
IP_195056.1	SLC35C1	0	0	1	1	APSAPEEVSARSPSRPGDTGR
IP_197089.1	C11CDS95	0	0	1	1	IDMLGNAGHHGGSVTPEGGKALHTALG
IP_198840.1	CTTN	0	0	1	1	SHLTLMTSSPTSR
IP_203630.1	ETS1	0	1	0	1	MPTSDGTEGAGETLLRPSKDSR
IP_204696.1	LOC101928510	0	0	1	1	QERFQTHTQKNY
IP_207226.1	GPRC5A	0	0	1	1	RNSPSHGPTLGR
IP_210965.1	RDH5 BLOC1S1-RDH5	0	1	0	1	QSTESSLPARDCFSR
IP_211694.1	GLI1	1	0	0	1	MASPAVSGPSPVR
IP_213892.1	FAM71C	0	0	1	1	TVSTTTGTMDVAATK
IP_215596.1	KSR2	1	0	0	1	ISLPVTLEESCWGSTK
IP_215999.1	UNC119B	0	1	0	1	AGVAVSCAPK
IP_217247.1	ZNF84	1	0	0	1	LSLGSHTLYHIK
IP_217880.1	AGAP2-AS1	1	0	0	1	SIPSPWEWGSGGRESR
IP_217970.1	TRHDE-AS1	1	0	0	1	MKMLALRTVGPK
IP_218327.1	LINC00943	1	0	0	1	YGTYFIQLGAEKESWK
IP_218608.1	IFT88	0	0	1	1	LPGPERRGSETAVTSPLPSWAK
IP_218815.1	PARP4	0	0	1	1	GNSVQITDENG
IP_221300.1	HS6ST3	1	0	0	1	FPEDWPSYK
IP_224637.1	RALGAPA1	0	1	0	1	KMMLLMLSLSNIQK
IP_225473.1	WDHD1	0	0	1	1	QNQSADLLGSQK
IP_228370.1	ATXN3	1	0	0	1	MCVYIYVYIYDFLLK
IP_228767.1	CLMN	0	0	1	1	LEEPGKSQPK
IP_228966.1	BCL11B	1	0	0	1	KGGGNGRES
IP_230176.1	FLJ31306	1	0	0	1	SYPSWNYSK
IP_233094.1	CEP152	0	0	1	1	LSPWPYK
IP_233290.1	TRPM7	0	0	1	1	IPSVIYLVKTYLQYPR
IP_235577.1	ISLR2	1	0	0	1	TWSEGVKAACIQLAAKLAGAGGTGA
IP_238140.1	PWRN2	0	1	0	1	SLMQLIQAC
IP_238699.1	LOC102723772	0	1	0	1	TLVLTQPNWTPDTGETEKDGEHK
IP_245901.1	CIRH1A	0	1	0	1	RGSFSSSSLLIT
IP_247403.1	FOXL1	1	0	0	1	MMTNFESRGPVGQCVGKDISGR
IP_248981.1	RP5-1142A6.2	0	0	1	1	QRTRLTMALPGDGTTGVGLWAQTPSPRR
IP_249302.1	GEMIN4	0	1	0	1	ETPRDSSGCSS
IP_249999.1	ANKFY1	1	0	0	1	MSALPGSESPLANTTVVTADVFFAINARPR
IP_251588.1	MYH8	1	0	0	1	LTTCSGSNRSWRR
IP_254365.1	LOC101060376 LOC101060389 TBC1D3C	0	1	0	1	VESVVSTSLSGSPPSHSLLCVSGHLGWPQK
IP_255461.1	ACLY	0	1	0	1	APHSWIMCYAIRTLQESK
IP_255545.1	KAT2A	0	0	1	1	LSSVLSPR
IP_256897.1	CDC27	0	1	0	1	YMYCLKQYFFK
IP_257360.1	ZNF652	0	1	0	1	MHITSIIQSYSYIRTTQK
IP_259064.1	TEX2	0	0	1	1	NPSQRSPTSAR
IP_259191.1	GNA13	1	0	0	1	MSQIQHMPIFLWYEVRAY
IP_260423.1	EXOC7	1	0	0	1	AEGPSLQPRSEVGTENSPTAQR
IP_260694.1	SEPT9	0	1	0	1	GECSPPGAPGPPARHMVWPSLSPYPCPAPK
IP_261995.1	LINC00324	1	0	0	1	GPGFKSR
IP_262051.1	TMEM220-AS1	0	0	1	1	GAVSPATCGAAPK
IP_262158.1	LOC101928729	0	0	1	1	STVPYGGSLSWGRGSLELGQRMGPPR
IP_262776.1	LOC101928045	1	0	0	1	WAFPWEEPLYVITFYIVAVEAKWTESPR
IP_263777.1	CHMP1B	0	0	1	1	QLAFALASMLT
IP_266191.1	KIAA1468	0	1	0	1	WQNMKFLYRNEK
IP_267604.1, IP_267605.1	NA	0	0	1	1	TPGAPPR
IP_270230.1, IP_270255.1	NA	0	0	1	1	TTVALPAPTSPHK
IP_270913.1	RTBDN	0	0	1	1	SGSGVTQTPGR
IP_271637.1	CYP4F2	1	0	0	1	MVNFVVCEFYLNQK
IP_272046.1	UNC13A	0	0	1	1	LGEGLSPGSQPR
IP_274425.1	WDR87	0	0	1	1	PCLCPSTSTLDKR
IP_274568.1	SPRED3	0	1	0	1	GAKDPALSSGEGARDLLQEMSVTK
IP_275502.1	ATP1A3	0	1	0	1	ALPSTVMT
IP_275735.1	PSG6	1	0	0	1	LLQIIAGSMLALFVTQPLAR
IP_276608.1	NOVA2	0	0	1	1	SGSLSAVAVVSSK
IP_277350.1	FGF21	1	0	0	1	WGALLTRAPK
IP_278975.1	PRKCG	1	0	0	1	QPAPSAGPRTT
IP_279887.1	PEG3	0	1	0	1	LKSQREMPTSLTVWELKTQKK
IP_282884.1	ZNF133	0	0	1	1	EVCPPFGSSAKKIK
IP_284906.1	SRSF6	0	0	1	1	ANLSPSLIGAPIHILEADLR
IP_284926.1	SGK2	0	1	0	1	ELPSAARKSDSN
IP_285518.1	ELMO2	1	0	0	1	TNMNAPLAAVPLSSPK
IP_285621.1	ZMYND8	1	0	0	1	KQGPSCCPYTTYAVEPFCMLCKTK
IP_285912.1	RP11-290F20.3	0	0	1	1	TPRGGPSPGGGGGS
IP_287274.1	ZNF512B	1	0	0	1	CQGVGVETRTPPTHAHLGLMRGWR
IP_291211.1	LOC101928862	1	0	0	1	TPLQSTHRPQK
IP_293030.1	NIPSNAP1	1	0	0	1	DLGAGDRHVTGTRK
IP_295427.1	MPPED1	1	0	0	1	TPSRCRTATC
IP_297009.1	PPP2R3B	0	0	1	1	PAAAPSTGR
IP_299151.1	NDUFB11	0	0	1	1	IVALAPTAAAHSRISFPAPETLQHHLSWR
IP_300434.1	ARHGEF9	0	1	0	1	KYAGSGLSEK
IP_303803.1	MMGT1	0	1	0	1	TPLGSGPPREASIAQVRGFSR
