# Supplementary material for: Deep transcriptome annotation enables the discovery and functional characterization of cryptic small proteins
Source: eLife journal article supplement (doi:10.7554/elife.27860), 2017-10-30
Supplement: supp [file elife-27860-supp-v1.zip › elife_poa_e27860_Supplementary_File_5.xlsx]

## Sheet: Sheet1
Alternative protein ID (query)	Gene altORF-CDS pair	Reference protein ID (subject)	% identical matches	Alignment length (aa)	Mismatch	Gaps	Start of alignment in query	End of alignment in query	Start of alignment in subject	End of alignment in subject	E-value	Bit score	Alternative protein (aa)	Reference protein (aa)	% overlap alignment	InterPro	Transmembrane	Signal Peptide
IP_229115.1	SLC25A29	XP_005267400.1	55.93	59	19	2	12	63	3	61	2e-08	58.5	409	333	9.77995
IP_275016.1	ZNF780A	NP_001136049.1	53.85	65	30	0	226	290	167	231	3e-12	70.5	320	642	10.9375	IPR0
IP_057896.1	LOC101929067	XP_005244875.1	67.92	53	17	0	202	254	1	53	2e-12	70.5	254	361	14.1732
IP_106500.1	ZNF717	XP_006712974.1	41.84	98	55	2	193	289	643	739	2e-09	60.8	295	914	14.5763
IP_178340.1	LOC101928552	XP_005263475.1	78.48	79	14	1	4	79	189	267	1e-21	102	386	649	16.8394
IP_106497.1	ZNF717	XP_006712974.1	49.12	57	29	0	3	59	682	738	3e-07	52	158	914	17.7215
IP_179105.1	LOC101928897	XP_006717418.1	86.27	51	7	0	1	51	224	274	6e-15	78.6	218	325	20.1835
IP_222164.1	TMCO3	XP_006720036.1	66.67	36	12	0	22	57	4	39	8e-06	46.6	115	296	20.8696
IP_208618.1	MUC19	IR_208607.1	60.67	478	110	8	1	410	3712	4179	3e-87	322	1647	4197	22.3437
IP_291903.1	LOC101927859	XP_006724469.1	75.25	101	24	1	163	263	524	623	2e-21	100	324	2373	23.7654	IPR0
IP_223430.1	ZNF219	XP_006720225.1	87.18	39	4	1	62	100	58	95	4e-07	51.2	136	811	25.7353
IP_140455.1	TMEM217	NP_001156372.1	25.93	162	115	2	1	159	9	168	1e-09	60.1	170	202	27.6471	IPR0	TM
IP_196710.1	BEST1	NP_004174.1	87.5	40	5	0	39	78	51	90	9e-14	73.2	125	585	28	IPR0
IP_302123.1	TCEAL4	XP_005262249.1	75	36	9	0	23	58	99	134	6e-09	57	95	358	28.4211
IP_217089.1	LOC100996573	XP_003846382.1	72.84	81	22	0	2	82	179	259	2e-25	112	199	351	29.6482
IP_247984.1	LOC101927910	XP_005256389.1	55.24	105	18	2	187	264	3	105	2e-12	70.9	275	307	31.6364		TM
IP_191865.1	LOC101927645	XP_005253332.1	58.95	95	22	2	106	183	120	214	1e-14	78.2	228	303	32.0175
IP_286976.1	LOC102723774	XP_006723959.1	72.41	145	40	0	66	210	30	174	1e-40	165	327	336	32.1101
IP_069113.1	NBPF26	XP_006711156.1	89.39	66	7	0	1	66	1	66	2e-28	122	180	1318	32.7778
IP_222165.1	TMCO3	XP_006720036.1	84.38	32	5	0	1	32	1	32	5e-09	57	79	296	34.1772
IP_217086.1	LOC100996573	XP_003846382.1	80.37	107	21	0	22	128	88	194	6e-42	168	250	351	34.4
IP_246100.1	PDPR	NP_060460.4	87.88	33	4	0	1	33	216	248	1e-11	65.5	81	879	35.8025
IP_104962.1	VPRBP	NP_001165375.1	72.55	51	11	1	1	48	31	81	8e-15	76.3	109	1506	36.6972
IP_274980.1	ZNF780B	XP_006723135.1	51.02	49	24	0	4	52	785	833	1e-06	48.9	68	834	36.7647
IP_253365.1	CORO6	XP_005258105.1	69.57	46	14	0	1	46	223	268	9e-12	66.2	87	472	36.7816
IP_291902.1	LOC101927859	XP_006724469.1	86.11	108	10	1	55	162	524	626	3e-35	146	261	2373	37.5479
IP_237530.1	VPS33B	NP_001276077.1	87.88	33	3	1	20	51	207	239	4e-11	64.3	79	590	37.9747	IPR0
IP_154936.1	CYP3A7-CYP3AP1	NP_001243426.1	78.12	32	7	0	1	32	503	534	5e-12	67	64	535	39.0625
IP_278361.1	ZNF577	NP_001129062.1	36.08	97	58	2	1	97	323	415	1e-08	55.5	99	426	39.3939
IP_152698.1	LOC101060341	XP_005271850.1	63.64	44	16	0	5	48	58	101	7e-08	53.1	71	382	39.4366
IP_188004.1	ITPRIP	NP_203755.1	75	40	10	0	1	40	488	527	1e-09	59.3	76	547	39.4737
IP_218477.1	LOC101060157	XP_006709992.1	66.67	138	36	2	6	142	1164	1292	1e-20	98.2	254	1311	40.1575
IP_171513.1	LOC102724286	XP_006716960.1	62.42	165	58	4	64	228	14	174	2e-34	144	256	375	41.7969
IP_278888.1	ZNF765	XP_006723529.1	79.66	59	9	2	50	107	408	464	2e-19	91.7	117	523	42.735	IPR0
IP_245310.1	HSF4	NP_001529.2	86.27	51	6	1	21	71	240	289	1e-17	85.9	104	462	43.2692
IP_097343.1	LOC102723762	XP_006712960.1	70.15	67	8	1	81	135	1	67	1e-14	76.3	135	319	43.7037
IP_057897.1	LOC101929067	XP_005244875.1	57.61	64	26	2	8	86	35	126	8e-15	76.3	86	361	44.186
IP_279491.1	SUV420H2	NP_116090.2	87.5	24	3	0	1	24	163	186	3e-06	48.1	47	462	44.6809
IP_296264.1	LOC101928892	XP_005262020.1	89.37	254	7	2	277	530	18	251	1e-111	401	542	604	45.572
IP_154824.1	ZNF789	NP_998768.2	86.11	36	5	0	1	36	59	94	2e-14	74.7	67	425	46.2687
IP_276175.1	IGSF23	XP_006723097.1	87.88	33	4	0	10	42	38	70	5e-10	60.5	62	116	46.7742
IP_245307.1	HSF4	NP_001035757.1	75	64	16	0	15	78	228	291	4e-19	90.5	102	492	47.0588
IP_123403.1	ADAM29	NP_001265056.1	89.66	29	3	0	1	29	755	783	1e-06	49.3	55	820	47.2727
IP_296258.1	LOC101928892	XP_005262020.1	82.2	264	7	4	277	530	18	251	2e-101	367	542	604	47.417
IP_291899.1	LOC101927859	XP_006724469.1	72.09	43	12	0	23	65	565	607	5e-07	50.4	65	2373	47.6923
IP_097349.1	LOC102723762	XP_006712960.1	70.15	67	8	1	67	121	1	67	7e-15	76.6	121	319	48.7603
IP_301058.1	OGT	XP_006724777.1	87.18	78	10	0	52	129	155	232	4e-36	147	138	1023	49.2754	IPR0
IP_218474.1	LOC101060157	XP_006709992.1	66.09	115	39	0	20	134	1060	1174	2e-21	99	153	1311	49.6732
IP_176858.1	PTGES2	NP_079348.1	82.76	29	5	0	3	31	87	115	4e-08	53.9	48	377	50
IP_191916.1	TSPAN32	NP_620591.3	83.78	37	6	0	4	40	178	214	1e-10	62.8	61	320	50.8197
IP_277593.1	PIH1D1	NP_060386.1	100	21	0	0	5	25	93	113	7e-06	46.6	41	290	51.2195
IP_218476.1	LOC101060157	XP_006709992.1	63.91	266	62	5	29	292	1059	1292	5e-46	183	393	1311	51.9084
IP_217111.1	P2RX2	NP_001269094.1	83.72	86	8	1	1	86	191	270	1e-38	156	149	349	52.349	IPR0
IP_302816.1	LUZP4	NP_057467.1	64.58	48	17	0	3	50	237	284	3e-12	67.8	59	313	52.5424
IP_250370.1	ZNF594	XP_005256884.1	87.44	199	24	1	4	201	599	797	2e-97	353	331	807	52.8701	IPR0
IP_106493.1	ZNF717	XP_006712974.1	74.29	70	18	0	20	89	447	516	5e-25	110	98	914	53.0612	IPR0
IP_247982.1	LOC101927910	XP_005256389.1	53.76	173	27	5	86	217	3	163	3e-15	80.1	275	307	53.0909			SP
IP_134386.1	NOP16	NP_001243468.1	73.2	97	26	0	25	121	131	227	3e-36	147	126	237	56.3492
IP_095012.1	SPAG16	XP_006712807.1	78.95	38	8	0	10	47	1	38	2e-11	65.1	53	443	56.6038
IP_097347.1	LOC102723762	XP_006712960.1	69.44	72	12	3	29	96	1	66	2e-14	75.1	103	319	58.2524
IP_173254.1	LOC101927644	XP_005252382.1	59.49	158	64	0	3	160	178	335	4e-30	128	161	387	58.3851		TM
IP_178335.1	LOC101928552	XP_005263474.1	88.57	35	4	0	17	51	592	626	8e-10	59.7	53	878	58.4906
IP_097512.1	LOC102723856	XP_006712962.1	72.73	55	11	2	16	70	83	133	9e-07	49.7	75	387	58.6667
IP_125441.1	LOC101928793	XP_005248446.1	86.25	80	11	0	27	106	246	325	1e-26	115	117	386	58.9744
IP_304019.1	CDR1	NP_004056.2	56.45	62	21	1	3	58	99	160	3e-09	57.8	69	262	59.4203
IP_144398.1	SMPD2	NP_003071.2	82.76	58	9	1	1	58	30	86	7e-22	99.8	81	423	60.4938	IPR0
IP_208608.1	MUC19	IR_208607.1	63.04	46	17	0	2	47	4152	4197	1e-12	69.3	47	4197	61.7021
IP_117230.1	TLR10	NP_001182036.1	76.67	30	7	0	8	37	72	101	2e-07	51.6	37	811	62.1622
IP_274394.1	ZNF781	XP_006723134.1	62.26	53	20	0	1	53	229	281	3e-10	61.2	53	327	62.2642
IP_208606.1	MUC19	IR_208607.1	78.26	46	10	0	12	57	4152	4197	8e-20	92.8	57	4197	63.1579
IP_240363.1	LOC101929668	XP_005255789.2	69.23	182	52	1	1	182	45	222	4e-50	195	205	310	63.4146			SP
IP_173252.1	LOC101927644	XP_005252382.1	65.38	102	24	4	1	120	158	276	2e-23	105	122	387	63.9344		TM
IP_280600.1	ZNF324	XP_006723192.1	76.47	34	8	0	1	34	1	34	3e-10	61.2	40	629	65
IP_126310.1	SLC45A2	NP_001012527.1	86.67	105	14	0	13	117	281	385	4e-50	194	138	460	65.942		TM
IP_222237.1	LOC100507747	XP_006720059.1	73.55	533	116	12	1	521	21	540	1e-135	481	607	615	68.6985
IP_147719.1	LOC101929844	XP_006715687.1	78.15	508	105	2	1	505	1	505	0	641	583	524	69.1252
IP_072588.1	ATP1A4	NP_653300.2	89.57	163	14	2	1	161	359	520	3e-79	292	210	1029	70.9524	IPR0
IP_274396.1	ZNF781	XP_006723134.1	72.09	43	12	0	1	43	201	243	4e-09	57.4	43	327	72.093
IP_290194.1	C21orf2	NP_001258369.1	87.5	32	1	1	1	29	7	38	4e-09	57.4	43	255	72.093
IP_176324.1	LOC102723420	XP_006717412.1	65.67	54	10	3	1	55	1	66	5e-09	57.4	61	302	72.1311		TM
IP_280317.1	ZNF586	NP_001070894.1	76.32	38	9	0	1	38	108	145	6e-12	67	39	210	74.359
IP_284820.1	EMILIN3	NP_443078.1	50.94	53	18	1	3	47	343	395	7e-06	46.6	47	766	74.4681
IP_296262.1	LOC101928892	XP_005262020.1	81.48	459	15	7	135	563	18	436	1e-179	627	591	604	75.1269
IP_115455.1	CRIPAK	NP_787114.2	63.58	346	54	8	1	313	102	408	8e-87	318	387	446	75.4522
IP_222238.1	LOC100507747	XP_006720059.1	75.6	545	108	9	1	533	1	532	4e-149	526	570	615	76.6667
IP_217165.1	LOC101928485	XP_006719811.1	76.04	530	123	2	1	528	1	528	0	740	528	582	77.0833
IP_101712.1	ZCWPW2	XP_005264950.1	73.58	53	9	1	6	53	230	282	4e-15	77.4	57	377	77.193
IP_097344.1	LOC102723762	XP_006712961.1	54.74	95	16	3	1	73	114	203	1e-12	68.9	102	305	77.451
IP_147716.1	LOC101929844	XP_006715687.1	75.24	513	98	9	1	501	1	496	1e-171	600	510	524	81.3725
IP_176322.1	LOC102723420	XP_006717412.1	62.14	346	43	12	1	302	1	302	2e-69	260	368	302	82.337		TM
IP_171521.1	LOC102724286	XP_006716960.1	65.03	163	18	2	26	175	14	150	3e-38	155	175	375	82.8571
IP_113181.1	LOC727978	XP_006713911.1	56.52	253	61	5	5	225	17	252	5e-58	221	225	299	85.3333
IP_218741.1	SACS	NP_055178.3	78.57	70	8	1	4	66	7	76	3e-28	120	71	4579	87.3239
IP_272320.1	ISYNA1	XP_006722829.1	71.08	204	5	2	1	150	31	234	2e-42	170	227	753	87.6652
IP_115449.1	CRIPAK	NP_787114.2	65.02	203	38	4	17	187	8	209	1e-52	203	187	446	88.2353
IP_147720.1	HGC6.3	NP_001123367.1	59.18	49	7	1	1	36	100	148	4e-07	50.8	47	171	89.3617
IP_115453.1	CRIPAK	NP_787114.2	65.64	259	36	5	1	207	122	379	1e-69	260	234	446	95.2991
IP_065825.1	SLC35D1	NP_055954.1	56.9	58	13	1	1	46	80	137	9e-12	66.2	47	355	95.7447
IP_097346.1	LOC102723762	XP_006712960.1	58.93	56	9	2	1	42	156	211	7e-06	46.6	44	319	100
IP_171197.1	UBAP2	NP_060919.3	76.75	228	0	1	1	175	39	266	8e-94	340	176	1119	100

## Sheet: Sheet2
alt	gene_alt	ref	gene_ref	identity%	length_map	mis	gap	start_alt	end_alt	start_ref	end_ref	E-value	score	size_alt	size_ref	overlap	InterPro	Transmembrane	SigPep
IP_140455.1	TMEM217	NP_001156372.1	TMEM217	25.93	162	115	2	1	159	9	168	1e-09	60.1	170	202	27.6471	IPR0	TM
IP_275016.1	ZNF780A	NP_001136049.1	ZNF780A	53.85	65	30	0	226	290	167	231	3e-12	70.5	320	642	10.9375	IPR0
IP_106493.1	ZNF717	XP_006712974.1	ZNF717	74.29	70	18	0	20	89	447	516	5e-25	110	98	914	53.0612	IPR0
IP_291903.1	LOC101927859	XP_006724469.1	LOC101927859	75.25	101	24	1	163	263	524	623	2e-21	100	324	2373	23.7654	IPR0
IP_278888.1	ZNF765	XP_006723529.1	ZNF765	79.66	59	9	2	50	107	408	464	2e-19	91.7	117	523	42.735	IPR0
IP_144398.1	SMPD2	NP_003071.2	SMPD2	82.76	58	9	1	1	58	30	86	7e-22	99.8	81	423	60.4938	IPR0
IP_217111.1	P2RX2	NP_001269094.1	P2RX2	83.72	86	8	1	1	86	191	270	1e-38	156	149	349	52.349	IPR0
IP_301058.1	OGT	XP_006724777.1	OGT	87.18	78	10	0	52	129	155	232	4e-36	147	138	1023	49.2754	IPR0
IP_250370.1	ZNF594	XP_005256884.1	ZNF594	87.44	199	24	1	4	201	599	797	2e-97	353	331	807	52.8701	IPR0
IP_196710.1	BEST1	NP_004174.1	BEST1	87.5	40	5	0	39	78	51	90	9e-14	73.2	125	585	28	IPR0
IP_237530.1	VPS33B	NP_001276077.1	VPS33B	87.88	33	3	1	20	51	207	239	4e-11	64.3	79	590	37.9747	IPR0
IP_072588.1	ATP1A4	NP_653300.2	ATP1A4	89.57	163	14	2	1	161	359	520	3e-79	292	210	1029	70.9524	IPR0
IP_173254.1	LOC101927644	XP_005252382.1	LOC101927644	59.49	158	64	0	3	160	178	335	4e-30	128	161	387	58.3851		TM
IP_176322.1	LOC102723420	XP_006717412.1	LOC102723420	62.14	346	43	12	1	302	1	302	2e-69	260	368	302	82.337		TM
IP_173252.1	LOC101927644	XP_005252382.1	LOC101927644	65.38	102	24	4	1	120	158	276	2e-23	105	122	387	63.9344		TM
IP_176324.1	LOC102723420	XP_006717412.1	LOC102723420	65.67	54	10	3	1	55	1	66	5e-09	57.4	61	302	72.1311		TM
IP_126310.1	SLC45A2	NP_001012527.1	SLC45A2	86.67	105	14	0	13	117	281	385	4e-50	194	138	460	65.942		TM
IP_247984.1	LOC101927910	XP_005256389.1	LOC101927910	55.24	105	18	2	187	264	3	105	2e-12	70.9	275	307	31.6364		TM
IP_247982.1	LOC101927910	XP_005256389.1	LOC101927910	53.76	173	27	5	86	217	3	163	3e-15	80.1	275	307	53.0909			SP
IP_240363.1	LOC101929668	XP_005255789.2	LOC101929668	69.23	182	52	1	1	182	45	222	4e-50	195	205	310	63.4146			SP
