# Supplementary material for: Deep transcriptome annotation enables the discovery and functional characterization of cryptic small proteins
Source: eLife journal article supplement (doi:10.7554/elife.27860), 2017-10-30
Supplement: supp [file elife-27860-supp-v1.zip › elife_poa_e27860_Supplementary_File_7.xlsx]

## Sheet: High-confidence list mammals
Alternative protein accession	Detection method	Gene ID	AltORF nucleotidic sequence	AltORF localization		MS = mass spectrometry			RP = ribosome profiling
IP_057435.1	RP	DVL1	ATGACGATGCCGTGCGGGTGCTGCGGGAGATCGTTTCCCAGACGGGGCCCATCAGCCTCACTGTGGCCAAGTGCTGGGACCCAACGCCCCGAAGCTACTTCACCGTCCCACGGGCTGACCCGGTGCGGCCCATCGACCCCGCCGCCTGGCTGTCCCACACGGCGGCACTGA	CDS
IP_057533.1	RP	SSU72	ATGTTTATGATTTCAAAACCACATATGACCAGATGTACAATGATCTTCTTAGGAAAGACAAAGAACTCTATACACAGAATGGGATTTTACATATGCTGGACAGAAATAAGAGAATCAAGCCCCGGCCAGAAAGATTCCAGAACTGCAAAGACCTGTTTGATCTGA	CDS
IP_058454.1	RP	RERE	ATGAGGGTAGCAGTGACCCCAAAGACATCGACCAGGACAATCGCAGCACGTCCCCGAGCATCCCCAGCCCCCAGGACAATGAGAGTGACTCGGACTCGTCAGCCCAGCAGCAGATGCTGCAGGCCCAGCCCCCAGCCTTGCAGGCTCCCACTGGGGTCACCCCAGCTCCCTCCTCAGCTCCTCCAGGGACCCCTCAGCTGCCCACGCCAGGGCCCACGCCCTCTGCCACTGCAGTTCCCCCACAGGGCTCCCCCACGGCCTCCCAGGCCCCTAACCAGCCACAGGCTCCCACAGCGCCTGTTCCCCACACCCACATCCAACAGGCACCGGCCTTGCACCCCCAGCGGCCGCCCTCACCGCATCCCCCGCCGCATCCCTCGCCACATCCCCCGCTGCAGC…	CDS
IP_058467.1	RP	ENO1	ATGATAAGACTCGCTATATGGGGAAGGGTGTCTCAAAGGCTGTTGAGCACATCAATAAAACTATTGCGCCTGCCCTGGTTAGCAAGAAACTGA	CDS
IP_058470.1	RP	ENO1	ATGGAACAGAAAATAAATCTAAGTTTGGTGCGAACGCCATTCTGGGGGTGTCCCTTGCCGTCTGCAAAGCTGGTGCCGTTGAGAAGGGGGTCCCCCTGTACCGCCACATCGCTGACTTGGCTGGCAACTCTGAAGTCATCCTGCCAGTCCCGGCGTTCAATGTCATCAATGGCGGTTCTCATGCTGGCAACAAGCTGGCCATGCAGGAGTTCATGA	CDS		AltMID51: IP_294711.1
IP_058704.1	RP	PGD	ATGACCACGGCTTTGTGGTCTGTGCTTTTAATAGGACTGTCTCCAAAGTTGATGATTTCTTGGCCAATGAGGCAAAGGGAACCAAAGTGGTGGGTGCCCAGTCCCTGA	CDS		AltDDIT3: IP_211724.1
IP_058723.1	RP	DFFA	ATGATGACGATTACTTTCTGTGTCTACCTTCCAATACTAAGTTTGTGGCATTGGCTAGTAATGAGAAATGGGCATACAACAATTCAGATGGAGGTACAGCTTGGATTTCCCAAGAGTCCTTTGATGTAG	CDS
IP_058769.1	RP	TARDBP	ATGAGAACGATGAGCCCATTGAAATACCATCGGAAGACGATGGGACGGTGCTGCTCTCCACGGTTACAGCCCAGTTTCCAGGGGCGTGTGGGCTTCGCTACAGGAATCCAGTGTCTCAGTGTATGA	CDS
IP_058770.1	MS and RP	TARDBP	ATGCCCCAGATGCTGGCTGGGGAAATCTGGTGTATGTTGTCAACTATCCAAAAGATAACAAAAGAAAAATGGATGAGACAGATGCTTCATCAGCAGTGA	CDS
IP_058885.1	RP	FBXO6	ATGCCACATGGACAGAGGTCTCCTACACCTTCTCAGACTACCCCCGGGGTGTCCGCTACATCCTCTTCCAGCATGGGGGCAGGGACACCCAGTACTGGGCAGGCTGGTATGGGCCCCGAGTCACCAACAGCAGCATTGTCGTCAGCCCCAAGATGA	CDS
IP_059007.1	RP	MFN2	ATGCATCTGCCTCAGAGCCCGAGTACATGGAGGAGGTGCGGCGGCAGCACATGGAGCGTTGTACCAGCTTCCTGGTGGATGAGCTGGGCGTGGTGGATCGATCCCAGGCCGGGGACCGCATCTTCTTTGTGTCTGCTAAGGAGGTGCTCAACGCCAGGATTCAGAAAGCCCAGGGCATGCCTGAAGGAGGGGGCGCTCTCGCAGAAGGCTTTCAAGTGA	CDS
IP_059008.1	RP	MFN2	ATGCATCCCCACTTAAGCACTTTGTCACTGCCAAGAAGAAGATCAATGGCATTTTTGAGCAGCTGGGGGCCTACATCCAGGAGAGCGCCACCTTCCTTGAAGACACGTACAGGAATGCAGAACTGGACCCCGTTACCACAGAAGAACAGGTTCTGGACGTCAAAGGTTACCTATCCAAAGTGA	CDS
IP_059349.1	RP	PLEKHM2	ATGTCTACCTGCTCCGGAAAGGGGCCACAGAGAAGCCATACCTGGTGGAAGAGGCCGTTTCTTACAATGAACTTGACTATGTGTCGGTTGGCCTTGACCAGCAGACGGTGA	CDS
IP_059495.1	RP	FBXO42	ATGTCATGGCCAGCTCCTCGGACAGTGAAGATGACAGTTTCATGGCTGTGGACCAGGAAGAAACTGTGCTGGAAGGGACAATGGATCAAGATGAGGAGCCCCACCCAGTATTGGAGGCTGAGGAGACTAGACATAATAGGTCCATGTCGGAGCTGCCAGAAGAGGTTTTGGAGTATATCCTGTCCTTTCTCTCACCGTATCAGGAACACAAAACTGCGGCCCTTGTCTGCAAACAGTGGTATCGACTTATCAAAGGTGTAG	5'UTR
IP_059534.1	RP	NECAP2	ATGGAGTGGCCGGCTGAGGATCACTGCAAAGGGACAGATGGCCTACATCAAGCTGGAGGACAGGACGTCAGGGGAGCTCTTTGCTCAGGCCCCGGTGGATCAGTTTCCTGGCACAGCTGTGGAGAGTGTGACGGATTCCAGCAGGTACTTCGTGATCCGCATCGAAGATGGAAATGGGCGACGGGCGTTTATTGGAATTGGCTTCGGGGACCGAGGTGA	CDS
IP_059650.1	MS	PADI3	ATGAGATGGAGCTGGGCTACGTTCAGGCGCCGCACAAGACCCTCCCGGTGGTCTTTGACTCCCCAAGGAATGGGGAACTGCAGGATTTCCCTTACAAAAGAATCCTGGGTCCAGATTTTGGTTACGTGA	CDS
IP_059653.1	MS	PADI3	ATGATCCGAGCTGTGATGTCCAGGACAATTGTGACCAGCACGTGCACTGCCTGCAAGACCTGGAAGACATGTCTGTCATGGTCCTGCGGACGCAGGGCCCTGCAGCCCTCTTTGATGACCACAAACTTGTCCTCCATACCTCCAGCTATGATGCCAAACGGGCACAGGTCTTCCACATCTGCGGTCCTGAGGATGTGTGTGAGGCCTATAGGCATGTGCTGGGCCAAGATAAGGTGTCCTATGAGGTACCCCGCTTGCATGGGGATGAGGAGCGCTTCTTCGTGGAAGGCCTGTCCTTCCCTGATGCCGGCTTCACAGGACTCATCTCCTTCCATGTCACTCTGCTGGACGACTCCAACGAGGATTTCTCGGCATCCCCTATCTTCACTGACACTGTGG…	CDS
IP_059759.1	RP	ALDH4A1	ATGCCAAGTCCTTTGCCCGTATCAAGAAGTGGCTGGAGCACGCACGCTCCTCACCCAGCCTCACCATCCTGGCCGGGGGCAAGTGTGATGACTCCGTGGGCTACTTTGTGGAGCCCTGCATCGTGGAGAGCAAGGACCCTCAGGAGCCCATCATGA	CDS
IP_059796.1	RP	UBR4	ATGGCAAGACTAAGGAGCAGTTTGGCTGGCCTGATGAGCCCCCAGAAGAATTCCCTTCTGCCTCTGTCAGCAACATCTGCCCTTCAAATCTGA	CDS
IP_059804.1	RP	UBR4	ATGATGATGACGATGATGATGCAGATGAGAAAATGCAGTCATCAGGGATCCCGAATGGTGGTCACATCCGTCAGGAAAGCCAGGAACAGAGTGAGGTGGACCATGGAGATTTTGAGATGGTGTCTGAGTCGATGGTCCTGGAGACAGCTGAAAATGTCAACAATGGCAACCCCTCTCCCCTGGAGGCCCTGCTGGCAGGCGCAGAGGGCTTCCCCCCCATGCTGGACATCCCACCTGATGCAGATGACGAGACCATGGTTGAACTAG	CDS
IP_060117.1	RP	HP1BP3	ATGAAACTCCACCTGCTACTTCGAGTGAGGCAGAGCAGCCAAAGGGGGAACCTGAGAATGAAGAGAAGGAAGAAAATAAGTCTTCTGAGGAAACCAAAAAGGATGAGAAAGATCAGTCTAAAGAAAAGGAGAAGAAAGTGA	CDS
IP_060133.1	RP	EIF4G3	ATGATGATGTCTTTGAGAAGAAGCAGAAAGAACTTGAGGCTGCCAGTGCTCCAGAGGAGAGGACAAGGCTTCATGATGAACTGGAAGAAGCCAAGGACAAAGCCCGGCGGAGATCCATTGGCAACATCAAGTTTATTGGAGAACTCTTTAAACTCAAAATGCTGA	CDS
IP_060134.1	RP	EIF4G3	ATGCATCGTCCCCTGGACTCTCTCAAACCCCTTATCCCTCTGGACAGAATGCAGGTCCAACCACGCTGGTATACCCTCAAACCCCTCAGACAATGA	5'UTR
IP_060221.1	RP	USP48	ATGAAGATATTCTGTGTCCACATGGTGAGTTATGCATATCTGAAAATGAAAGAAGGCTTGTTTCTAAAGAGGCTTGGAGCAAACTGCAGCAGTACTTTCCAAAGGCTCCTGAGTTTCCAAGTTACAAAGAGTGCTGTTCACAGTGCAAGATTTTAG	CDS
IP_060313.1	RP	CDC42	ATGTATTTGACGAAGCAATATTGGCTGCCCTGGAGCCTCCAGAACCGAAGAAGAGCCGCAGGTGTGTGCTGCTATGAACATCTCTCCAGAGCCCTTTCTGCACAGCTGGTGTCGGCATCATACTAA	CDS
IP_060456.1	RP	HNRNPR	ATGTCGATCTTGATGAAAGAGCAATTGATGCTCTCAGGGAATTTAATGAAGAAGGAGCTCTGTCTGTACTACAGCAGTTCAAGGAAAGTGACTTATCACATGTTCAGAACAAAAGTGCATTTTTATGTGGAGTTATGA	5'UTR
IP_060459.1	RP	HNRNPR	ATGAAATTCGCCCTGGTAAACACCTTGGAGTGTGCATTTCTGTGGCAAACAACAGACTTTTTGTTGGATCCATTCCGAAGAATAAGACTAAAGAAAACATTTTGGAAGAATTCAGTAAAGTCACAGAGGGTTTGGTGGACGTTATTCTCTATCATCAACCCGATGACAAAAAGAAGAATCGGGGGTTCTGCTTCCTTGAATATGAGGATCACAAGTCAGCAGCACAAGCCAGACGCCGGCTGA	CDS
IP_060542.1	RP	PITHD1	ATGCTACAAAAATTTCTCGTTTTTCAAATGTCTATCATCTCTCAATTCATATTTCAAAAAACTTCGGAGCAGATACGACAAAGGTCTTTTATATTGGCCTGA	CDS
IP_060590.1	RP	PNRC2	ATGTTGGCCTCAGCTCCTAGGCTGAACTCAGCAGATCGGCCCATGAAAACTTCTGTATTGAGACAAAGGAAGGGATCTGTCAGAAAGCAACACTTGTTATCTTGGGCTTGGCAGCAAGGAAGAGGACAGGTAGTGGAGATCCTGCAATCTGAAAAGCAGACTGAAAGGTGA	5'UTR
IP_060591.1	RP	PNRC2	ATGGTTATAACTCATCAGCAGCTGCCTGGCAGGCCATGCAAAATGGGGGGAAGAACAAAAATTTTCCAAATAATCAAAGTTGGAATTCTAGCTTATCAGGTCCCAGGTTACTTTTTAAATCTCAAGCTAATCAGAACTATGCTGGTGCCAAATTTAGTGAGCCGCCATCACCAAGTGTTCTTCCCAAACCACCAAGCCACTGGGTCCCTGTTTCCTTTAATCCTTCAGATAAGGAAATAA	CDS
IP_060598.1	RP	SRSF10	ATGTGTATGTTCCACTTGATTTCTACACTCGCCGTCCAAGAGGATTTGCTTATGTTCAATTTGAGGATGTTCGTGATGCTGAAGACGCTTTACATAATTTGGACAGAAAGTGGATTTGTGGACGGCAGATTGAAATACAGTTTGCCCAGGGGGATCGAAAGACACCAAATCAGATGA	CDS
IP_060600.1	RP	SRSF10	ATGTGTACAGTTCTTCACGCTATGATGATTATGACAGATACAGACGTTCTAGAAGCCGAAGTTATGAAAGGAGGAGATCAAGAAGTCGGTCTTTTGATTACAACTATAGAAGATCGTATAGTCCTAGAAATAGACCGACTGGAAGACCACGGCGTAGCAGAAGCCATTCCGACAATGATAGACCAAACTGCAGCTGGAATACCCAGTACAGTTCTGCTTACTACACTTCAAGAAAGATCTGAAAGCGGAAAAAGAACCAAAGAAGGGCAGTTCAAGCGACCAAAGGGTGGGTGGAAGGTGCTGCAGTATGAATACTGTACGAATATTTTGACTCTGGTCTGA	CDS
IP_061083.1	RP	HMGN2	ATGCTGGCAAGGAGGGGAATAACCCTGCAGAAAATGGAGATGCCAAAACAGACCAGGCACAGAAAGCTGAAGGTGCTGGAGATGCCAAGTGAAGTGTGTGCATTTTTGATAACTGTGTACTTCTGGTGA	CDS
IP_061093.1	RP	RPS6KA1	ATGCTGTCAAGGTCATTGATAAGAGCAAGCGGGATCCTTCAGAAGAGATTGAGATTCTTCTGCGGTATGGCCAGCACCCCAACATCATCACTCTGA	CDS
IP_061117.1	RP	ARID1A	ATGAAATGCTGCACACAGATCAGAGGGCCAACCACGAAGGCTCGTGGCCTTCCCATGGCACACGCCAGCCCCCATATGGTCCCTCTGCCCCTGTGCCCCCCATGA	CDS
IP_061118.1	RP	ARID1A	ATGAGACCCCACTGTGTACCCTTCTGGACTGGCAGGATTCTCTTGCCAAGCGCTGCGTCTGTGTGTCCAATACCATTCGAAGCCTGTCATTTGTGCCAGGCAATGACTTTGAGATGTCCAAACACCCAGGGCTGCTGCTCATCCTGGGCAAGCTGA	CDS
IP_061120.1	RP	ARID1A	ATGGGACACCCAAGACAGAATCCAAATCCAAGAAATCCAGTTCTTCTACTACAACCAATGAGAAGATCACCAAGTTGTATGAGCTGGGTGGTGAGCCTGAGAGGAAGATGTGGGTGGACCGTTATCTGGCCTTCACTGAGGAGAAGGCCATGGGCATGA	CDS
IP_061123.1	RP	ARID1A	ATGGTCCCCAGGGGGGTCAGTATGGCCCACAAGGTGGCTACCCCAGGCAGCCAAACTATAATGCCTTGCCCAATGCCAACTACCCCAGTGCAGGCATGGCTGGAGGCATAA	CDS
IP_061126.1	RP	ARID1A	ATGGCGGGACTAACCCATACTCGCAGCAACAGGGACCTCCGTCAGGACCGCAGCAAGGACATGGGTACCCAGGGCAGCCATACGGGTCCCAGACCCCGCAGCGGTACCCGATGA	CDS
IP_061127.1	RP	ARID1A	ATGCCTTTGAATGCAAGATTGAACGGGGAGAAGACCCTCCCCCAGACATCTTTGCAGCTGCTGATTCCAAGAAGTCCCAGCCCAAGATCCAGCCTCCCTCTCCTGCGGGATCAGGATCTATGCAGGGGCCCCAGACTCCCCAGTCAACCAGCAGTTCCATGGCAGAAGGAGGAGACTTAA	CDS
IP_061287.1	RP	WASF2	ATGGCAGCATTGGCTGTGTTGAAAACGTGGATGCAAGTAGCTATCCGCCACCACCACAGTCAGACTCTGCTTCTTCACCTTCTCCTTCCTTCTCCGAGGACAACTTGCCTCCTCCACCAGCAGAATTCAGTTACCCAGTGGACAACCAAAGAGGATCTGGTTTGGCTGGACCCAAAAGATCCAGTGTGGTCAGCCCAAGCCATCCACCACCAGCTCCTCCTCTAG	CDS
IP_061331.1	MS	STX12	ATGAGGAGTGGAACCAGATGCAGAGCCAGGAGGATGAGGTGGCCATCACTGAGCAGGATTTGGAACTTATTAAAGAAAGAGAAACGGCAATTCGGCAGCTGGAGGCTGACATTTTGGATGTCAATCAGATATTTAAAGATTTGGCCATGA	CDS
IP_061429.1	RP	DNAJC8	ATGATGCTGACAGAGCACAAAAGGCTTTTGAAGCTGTGGACAAAGCTTACAAGTTGCTACTGGATCAGGAGCAAAAGAAGAGGGCCCTGGATGTAA	CDS
IP_061523.1	RP	YTHDF2	ATGGCCGGGTTTTCATCATTAAGAGCTACTCTGAGGACGATATTCACCGTTCCATTAAGTATAATATTTGGTGCAGCACAGAGCATGGTAACAAGAGACTGGATGCTGCTTATCGTTCCATGA	CDS
IP_061527.1	RP	YTHDF2	ATGACTTCTCACACTATGAGAAACGCCAAGAGGAAGAAGAAAGTGTTAAAAAGGAACGTCAAGGTCGTGGGAAATAAAAGGCAGTTCTACACAGACTGCAGCAACGGTTGCATCTGCATATCCTAA	CDS
IP_061593.1	RP	SRSF4	ATGCCAAGTCTGAATCCAGCCAGAGGGAAGGTCGAGGAGAGAGTGAGAATGCTGGCACCAATCAGGAGACCCGGTCCAGGTCGAGATCCAATTCCAAATCGAAACCAAACCTTCCATCAGAATCACGCTCCAGATCAAAGTCAGCTTCAAAAACCCGATCTCGGTCCAAGTCTAGATCCAGGTCTGCTTCCAGATCGCCCTCCCGATCTAGATCTAGGTCCCACTCAAGGTCCTAACTGGCTATGGCCACAGCTGGAACTACCCGAGAAGTCTTTTGTACATGTTTGGTAG	CDS
IP_061662.1	RP	PUM1	ATGGTTTACCAGTGCAGAATGGGATTGATGCAGACGTCAAAGATTTTAGCCGTACCCCTGGTAATTGCCAGAACTCTGCTAATGAAGTGGATCTTCTGGGTCCAAACCAGAATGGTTCTGAGGGCTTAG	CDS
IP_061670.1	MS	PUM1	ATGGCGAGACAGTGCCTGGGGAACATCAGATCATTCAGTTTCCCAGCCAATCATGGTGCAGAGAAGACCTGGTCAGAGTTTCCATGTGAACAGTGA	CDS
IP_061811.1	RP	KHDRBS1	ATGAAGAATATGGATATGATGATACATACGCAGAACAAAGTTACGAAGGCTACGAAGGCTATTACAGCCAGAGTCAAGGGGACTCAGAATATTATGACTATGGACATGGGGAGGTTCAAGATTCTTATGAAGCTTATGGCCAGGACGACTGGAATGGGACCAGGCCGTCGCTGA	CDS
IP_061817.1	RP	TMEM39B	ATGGCCCGGACGCCATGCCCACCCATGCCTGCTGCCTGTCACCCAGCCTCATCCGCAGTGAGGTGGAGTTCCTCAAGATGGACTTCAACTGGCGCATGA	CDS
IP_061848.1	RP	KPNA6	ATGATAGCAGCCTGGCTCCCCAAGTCGATGAAACGCAACAGCAGTTCATCTTCCAGCAGCCTGAGGCCCCCATGGAGGGCTTCCAGCTATAATATCTGCCTCCAGGGAGGGGAGGGGATGGGAAGCACCACCAGCCAGCGGAAGAGCAGCCCTCTGGTGGGCGGGAAACCAGTGTCCCCACCATCAGCCACCACACACCTCTGCTGCCCTGGAGACTGTGCTCTTGACCTGCTCCGCCCCCTTCCCTGGAGGGAGCACCCTCTGGACAGACAGAACCATCTGAGGCTCACCTTTGGGTTTTGTGACAAGAAGGGGACGTGTTGGGTTTTTCTTCCTTACACTATATTTTGGCTGCACACATGTCTTTAA	CDS
IP_061922.1	RP	EIF3I	ATGGTGAGAGGCTGGGCACCTACATGGGCCATACCGGAGCTGTGTGGTGTGTGGACGCTGACTGGGACACCAAGCATGTCCTCACTGGCTCAGCTGACAACAGCTGTCGTCTCTGGGACTGTGAAACAGGAAAGCAGCTGGCCCTTCTCAAGACCAATTCGGCTGTCCGGACCTGCGGTTTTGACTTTGGGGGCAACATCATCATGTTCTCCACGGACAAGCAGATGGGCTACCAGTGCTTTGTGA	CDS
IP_061924.1	RP	EIF3I	ATGAGCGGTCCATTACGCAGATTAAGTATAACCGCGAAGGAGACCTCCTCTTTACTGTGGCCAAGGACCCTATCGTCAATGTATGGTACTCTGTGA	CDS
IP_061940.1	MS and RP	HDAC1	ATGACTACATTAAATTCTTGCGCTCCATCCGTCCAGATAACATGTCGGAGTACAGCAAGCAGATGCAGAGATTCAACGTTGGTGAGGACTGTCCAGTATTCGATGGCCTGTTTGAGTTCTGTCAGTTGTCTACTGGTGGTTCTGTGGCAAGTGCTGTGA	CDS
IP_061941.1	RP	HDAC1	ATGAGTACCTGGAGAAGATCAAACAGCGACTGTTTGAGAACCTTAGAATGCTGCCGCACGCACCTGGGGTCCAAATGCAGGCGATTCCTGAGGACGCCATCCCTGAGGAGAGTGGCGATGAGGACGAAGACGACCCTGACAAGCGCATCTCGATCTGCTCCTCTGACAAACGAATTGCCTGTGAGGAAGAGTTCTCCGATTCTGAAGAGGAGGGAGAGGGGGGCCGCAAGAACTCTTCCAACTTCAAAAAAGCCAAGAGAGTCAAAACAGAGGATGAAAAAGAGAAAGACCCAGAGGAGAAGAAAGAAGTCACCGAAGAGGAGAAAACCAAGGAGGAGAAGCCAGAAGCCAAAGGGGTCAAGGAGGAGGTCAAGTTGGCCTGAATGGACCTCTCCAGCT…	CDS
IP_062009.1	RP	RBBP4	ATGCAGAAGACGGGCCACCAGAGTTGTTGTTTATTCATGGTGGTCATACTGCCAAGATATCTGATTTCTCCTGGAATCCCAATGAACCTTGGGTGA	CDS
IP_062010.1	RP	RBBP4	ATGTTCTTGTTTTTGACTATACAAAACATCCTTCTAAACCAGATCCTTCTGGAGAGTGCAACCCAGACTTGCGTCTCCGTGGACATCAGAAGGAAGGCTATGGGCTTTCTTGGAACCCAAATCTCAGTGGGCACTTACTTAGTGCTTCAGATGACCATACCATCTGCCTGTGGGACATCAGTGCCGTTCCAAAGGAGGGAAAAGTGGTAG	CDS
IP_062175.1	RP	PHC2	ATGCACAGGGGTTCCTGCCTGAGAAACTTCCACAGCAGGATCACACCACCACCACTGACTCGGAGATGGAGGAGCCCTATCTGCAAGAATCCAAAGAGGAGGGTGCTCCCCTCAAACTCAAGTGTGAGCTCTGTGGCCGGGTGGACTTTGCCTATAAGTTCAAGCGTTCCAAGCGCTTCTGTTCCATGGCTTGTGCAAAGAGGTACAACGTGGGATGCACCAAACGGGTGGGACTTTTCCACTCAGACCGGAGCAAGCTGCAGAAGGCAGGAGCTGCGACCCACAACCGCCGTCGGGCCAGCAAAGCCAGTCTGCCACCACTTACCAAGGATACCAAGAAGCAGCCAACAGGCACTGTGCCCCTTTCGGTTACTGCTGCTTTGCAGCTAA	CDS
IP_062314.1	RP	SMIM12	ATGAGGACGGACGTTGATGAGGCCATGAATGAGATGTCATGTGGCCTGTGTTTTGGACCGTGGTTCGTACCTATGCTCCTTATGTCACATTCCCTGTTGCCTTCGTGGTCGGGGCTGTGGGTTACCACCTGGAATGGTTCATCAGGGGAAAGGACCCCCAGCCCGTGGAGGAGGAAAAGAGCATCTCAGAGCGCCGGGAGGATCGCAAGCTGGATGAGCTTCTAG	5'UTR
IP_062331.1	RP	ZMYM6	ATGATTCAGGAAAAACAGAGCTTTTCTGCTCTATTAATTGCTTATCTGCTTACAGAGTTAAGACTGTTACTTCTTCAGGTGTCCAGGTTTCATGTCATAGTTGTAAAACCTCAGCAATCCCTCAGTATCACCTAG	CDS
IP_062337.1	MS	ZMYM1	ATGGTCTTCACAGTAATATTCCTTGTCTCTCAAAGCTATTATATATTGCTTTGTCTTGGCCAATTACTTCAGCAAGTACTGAGAACTCATTTTCTACCCTGCCTCGTCTTAAGACATATTTATGTAATACCATGGGACAAGAGAAGCTTACTGGCCCAGCCCTAA	CDS
IP_062455.1	MS	CLSPN	ATGAAAAAGAAATGGATAAAGAAAATAATGATGGCAGTAGTGAAATTGGCAAGGCAGTTGGCTTCCTCTCTGTTCCCAAGTCTCTCTCATCAGATTCTACTTTACTTCTGTTTAAGGACAGCTCTTCCAAGATGGGTTACTTTCCTACTGAAGAAAAATCAGAAACAGATGAAAACTCAGGCAAGCAGCCTAGCAAACTGGATGAGGATGATTCATGTTCATTGCTAA	CDS
IP_062516.1	MS	AGO1	ATGTTACCCGTCGCCCTGCTAGCCATCAGACATTCCCCTTACAGCTGGAGAGTGGACAGACTGTGGAGTGCACAGTGGCACAGTATTTCAAGCAGAAATATAACCTTCAGCTCAAGTATCCCCATCTGCCCTGCCTACAAGTTGGCCAGGAACAAAAGCATACCTACCTTCCCCTAG	CDS
IP_062583.1	RP	TRAPPC3	ATGTTGGGAGGTGCCATGACTTTCGGGAAACTGCGGATGTCATTGCCAAGGTGGCGTTCAAGATGTACTTGGGCATCACTCCAAGCATTACTAATTGGAGCCCAGCTGGTGATGAATTCTCCCTCATTTTGGAAAATAACCCCTTGGTGGACTTTGTGGAACTTCCTGATAACCACTCATCCCTTATTTATTCCAATCTCTTGTGTGGGGTGTTGCGGGGAGCTTTGGAGATGGTCCAGATGGCTGTGGAGGCCAAGTTTGTCCAGGACACCCTGA	CDS
IP_062605.1	MS	THRAP3	ATGATCCTGTTGATCTCCGCCTTGATATTGAACGTCGTAAAAAACATAAGGAGAGAGATCTTAAACGAGGTAAATCGAGAGAATCAGTGGATTCCCGAGACTCCAGTCACTCAAGGGAAAGGTCAGCTGAAAAAACAGAGAAAACTCATAAAGGATCAAAGAAACAGAAGAAGCATCGGAGAGCAAGAGACAGGTCCAGATCCTCCTCCTCTTCCTCCCAGTCATCTCACTCCTACAAAGCAGAAGAGTACACTGAAGAGACAGAGGAAAGAGAGGAGAGCACCACGGGCTTTGACAAATCAAGACTGGGGACCAAAGACTTTGTGGGTCCAAGTGAAAGAGGAGGTGGCAGAGCTCGAGGAACCTTTCAGTTTCGAGCCAGAGGAAGAGGCTGGGGCA…	CDS
IP_062606.1	RP	THRAP3	ATGGAAACTACCGCTCAAATTGGCAGAATTACCGGCAAGCATACAGTCCTCGTCGAGGCCGTTCAAGATCCCGGTCCCCAAAGAGAAGGTCCCCTTCACCAAGGTCCAGGAGCCATTCTAGAAACTCTGATAAGTCGTCTTCTGACCGGTCAAGGCGCTCCTCATCCTCCCGTTCTTCCTCCAACCATAGCCGAGTTGAATCTTCTAAGCGCAAGTCTGCAAAGGAGAAAAAGTCCTCTTCTAAGGATAGCCGGCCATCTCAGGCTGCCGGGGATAACCAGGGAGATGAGGCCAAGGAGCAGACATTCTCTGGAGGCACCTCTCAAGATACAAAAGCATCTGAGAGCTCGAAGCCATGGCCAGATGCCACCTACGGCACTGGTTCTGCATCACGGGCCT…	CDS
IP_062608.1	RP	THRAP3	ATGACTTTGAGAAGAAGATGGCTGACTTCCACAAGGAGGAGATGGATGATCAAGATAAGGACAAAGCTAAGGGAAGAAAGGAATCTGAGTTTGATGATGAACCCAAATTTATGTCTAAAGTCATAG	CDS
IP_062811.1	MS	EPHA10	ATGGCAAAGGAGGAGGGGATGCCCATGATGAAGAGGAGCTGTATTTCCACTTCAAAGTCCCAACACGTCGCACATTCCTGGACCCCCAGAGCTGTGGGGACCTGCTGCAGGCTGTGCATCTGTTCGCCAAGGAACTGGATGCGAAAAGCGTCACGCTGGAGAGGAGCCTTGGAGGAGGGCGGTTTGGGGAGCTGTGCTGTGGCTGCTTGCAGCTCCCCGGTCGCCAGGAGCTGCTCGTAG	CDS
IP_062884.1	RP	INPP5B	ATGGGAAGGGAGTGCCTATGGACCAAAGCTCCAGGGGTCAAGATAAACCAGAAAGCTTGCAACCAAGACAGAATAAATCCAAGTCCGAAATTACTGACATGGTTCGCTCCTCCACTATCACAGTGTCGGACAAGGCTCATATTTTATCCATGCAGAAGTTTGGACTGCGAGATACAATTGTGA	CDS
IP_062902.1	RP	SF3A3	ATGAAAATGTACAGCGCAAGCAAGCCAGGACAGGAGAAGAGCGAGAAGAAGAGGAAGAAGAGCAGATCAGTGAGAGTGAGAGTGAAGATGAAGAGAACGAGATCATTTACAACCCCAAAAACCTGCCACTTGGCTGGGATGGCAAACCTATTCCCTACTGGCTGTATAAGCTTCATGGCCTAA	CDS
IP_062905.1	RP	SF3A3	ATGAGGAGAAGGAACGGCTCATGGACGTCATGGCTAAAGAGATGCTCACCAAGAAGTCCACGCTCCGGGACCAGATCAATTCTGATCACCGCACTCGGGCCATGCAAGATAGGTATATGGAGGTCAGTGGGAACCTGA	CDS
IP_062909.1	RP	FHL3	ATGAACCCTTCACCTGCCAGGACAGTGAGCTGCTCTGCAATGACTGCTACTGCAGTGCGTTTTCCTCGCAGTGCTCCGCTTGTGGGGAGACTGTCATGCCTGGGTCCCGGAAGCTGGAATATGGAGGCCAGACATGGCATGAGCACTGCTTCCTGTGCAGTGGCTGTGAACAGCCACTGGGCTCCCGTTCTTTTGTGCCCGACAAGGGTGCTCACTACTGCGTGCCCTGCTATGAGAACAAGTTTGCTCCTCGCTGCGCCCGCTGCAGCAAGACGCTGA	CDS
IP_062942.1	RP	AKIRIN1	ATGATCAGATTATGCGACGGTATGGGACAAGGCCAACAAGCTATGTGTCATGAAGCTTTGTCACATATCTGGGTACCAGGTTTGACCTCAAGAGATGGCTGCTGTACACTTTTTGCAACTGGTTTGATGTCACATTTCAGCTCCAACTTTGCATCCTGA	CDS
IP_062955.1	RP	MACF1	ATGCTGCTCACCTGGAATCAGGACAACCGGTACAATGTGAGTCAGATGTCATTATGTACATTCAGGAGTGTGAAGGTCTCATCAGGCAGCTGCAGGTGGATCTCCAGATCCTGCGGGATGAGAATTACTACCAGCTAG	CDS
IP_062981.1	MS	MACF1	ATGGGGATGGTTACATTGATTATTATGAATTTGTGGCTGCTCTTCATCCCAACAAGGATGCGTATCGACCAACAACCGATGCAGATAAAATCGAAGATGAGGTTACAAGACAAGTGGCTCAGTGCAAATGTGCAAAAAGGTTTCAGGTGGAGCAGATCGGAGAGAATAAATACCGGTTCTTCCTCGGCAATCAGTTTGGGGATTCTCAGCAGTTGCGGCTGGTCCGTATTCTGCGCAGCACCGTGA	CDS
IP_063061.1	RP	PABPC4	ATGATACTTTTTCTGCTTTTGGAAACATACTGTCCTGCAAGGTGGTGTGTGATGAGAACGGCTCTAAGGGTTATGCCTTTGTCCACTTCGAGACCCAAGAGGCTGCCGACAAGGCCATCGAGAAGATGA	CDS
IP_063100.1	RP	PPIE	ATGAAAAGGGCTTTGGCTTTAAGGGAAGCAGCTTCCACCGCATCATCCCCCAGTTCATGTGCCAGGGCGGTGATTTCACAAACCACAATGGCACTGGGGGCAAGTCCATCTATGGGAAGAAGTTCGATGATGAAAACTTTATCCTCAAGCATACGGGACCAGGTCTACTATCCATGGCCAACTCTGGCCCAAACACCAATGGCTCTCAGTTCTTCCTGA	CDS
IP_063101.1	RP	PPIE	ATGCTGCGTTCATTCCTTTTGGAGACATCACAGATATTCAGATTCCTCTGGATTATGAAACAGAAAAGCACCGAGGATTTGCTTTTGTTGAATTTGAGTTGGCAGAGGATGCTGCAGCAGCTATCGACAACATGA	CDS
IP_063201.1	RP	PPT1	ATGCCCTTCACCTCCCATGATCAATCTGATCTCGGTTGGGGGACAACATCAAGGTGTTTTTGGACTCCCTCGATGCCCAGGAGAGAGCTCTCACATCTGTGA	CDS
IP_063208.1	MS	RLF	ATGAAATTCATTGTGATCTTAATGGCTGTGGCCAGATTTTCACCCATCGCAGTAATTACTCACAACATGTATATTACCGACATAAAGACTATTATGATGATTTGTTTAGAAGCCAGAAAGTAG	CDS
IP_063217.1	RP	RLF	ATGGCTGTAATATTGTTTTCAGTGACTTGGGACAGCTTTACCACCATGAAGCACAACACTTTAGGGATGCATCTTACACATGCAACTTCCTTGGCTGTAAAAAGTTCTATTACTCCAAAATTGAATACCAGAATCACCTCTCAATGCATAATGTTGAAAATTCAAATGGAGACATAA	CDS
IP_063237.1	RP	SMAP2	ATGGATCCCAGACGCCTCAAATGCCTACTCAAGCAATGTTCATGGCTCCCGCTCAGATGGCATATCCCACAGCCTACCCCAGCTTCCCCGGGGTTACACCTCCTAACAGCATAA	CDS
IP_063238.1	RP	SMAP2	ATGAGAAGAAGAAATACATGGACCGAAGTCTGGACATCAATGCCTTTAGGAAAGAAAAAGATGACAAGTGGAAAAGAGGGAGCGAACCAGTTCCAGAAAAAAAATTGGAACCTGTTGTTTTTGAGAAGGTGA	CDS
IP_063362.1	RP	CTPS1	ATGGAGTGCTGGTTCCAGGAGGATTTGGTGTTCGAGGAACAGAAGGAAAAATCCAAGCAATTGCCTGGGCTCGGAATCAGAAAAAGCCTTTTTTGGGCGTGTGCTTAG	CDS
IP_063464.1	MS	FOXJ3	ATGGCAGTGGCCTCAACACCACAGGCAGTAATTCGGTTGCACAGGTCTCACTGTCTCACCCCCAGATGCACACACAGCCATCTCCACATCCTCCCCATCGACCGCATGGTTTACCGCAGCATCCGCAGCGTTCCCCACACCCAGCACCACACCCACAGCAACACAGCCAGCTCCAGTCCCCTCACCCCCAGCATCCCTCTCCACATCAACACATACAGCACCATCCGAACCATCAGCATCAGACGTTAA	CDS
IP_063554.1	RP	PPIH	ATGGAGATGGTACTGGAGTCGCCAGTATTTACCGGGGGCCATTTGCAGATGAAAATTTTAAACTTAGACACTCAGCTCCAGGCCTGCTTTCCATGGCGAACAGTGGTCCAAGTACAAATGGCTGTCAGTTCTTTATCACCTGCTCTAAGTGCGATTGGCTGGATGGGAAGCATGTGGTGTTTGGAAAAATCATCGATGGACTTCTAG	CDS
IP_063558.1	RP	YBX1	ATGAAGAAGATAAAGAAAATCAAGGAGATGAGACCCAAGGTCAGCAGCCACCTCAACGTCGGTACCGCCGCAACTTCAATTACCGACGCAGACGCCCAGAAAACCCTAAACCACAAGATGGCAAAGAGACAAAAGCAGCCGATCCACCAGCTGAGAATTCGTCCGCTCCCGAGGCTGAGCAGGGCGGGGCTGAGTAAATGCCGGCTTACCATCTCTACCATCATCCGGTTTAGTCATCCAACAAGAAGAAATATGAAATTCCAGCAATAA	CDS
IP_063561.1	RP	YBX1	ATGGAGAGACTGTGGAGTTTGATGTTGTTGAAGGAGAAAAGGGTGCGGAGGCAGCAAATGTTACAGGTCCTGGTGGTGTTCCAGTTCAAGGCAGTAAATATGCAGCAGACCGTAACCATTATAGACGCTATCCACGTCGTAGGGGTCCTCCACGCAATTACCAGCAAAATTACCAGAATAGTGAGAGTGGGGAAAAGAACGAGGGATCGGAGAGTGCTCCCGAAGGCCAGGCCCAACAACGCCGGCCCTACCGCAGGCGAAGGTTCCCACCTTACTACATGCGGAGACCCTATGGGCGTCGACCACAGTATTCCAACCCTCCTGTGCAGGGAGAAGTGA	CDS
IP_063630.1	RP	EBNA1BP2	ATGATGATGTATCTAGCTTCCGGGCCAAGACAGCTCATGGCAGAGGCCTCAAGAGGCCTGGCAAGAAAGGGTCAAATAAGAGACCTGGAAAACGAACAAGAGAGAAGATGA	CDS
IP_063671.1	MS	C1orf210	ATGCCAGCTACCGGCACCGCCCACTGCCTGAGACAGGAAGGGGAGGCCGCCCACAGGTGGCTGAAGATGAGGATGATGATGGCTTCATCGAGGACAATTACATTCAGCCTGGGACTGGCGAGCTGGGGACAGAGGGTAGCAGGGACCACTTCTCCCTCTGAGCTCCCATCTTTAGACCCTCCCCACTCCCTCCATGCCTGA	CDS
IP_063695.1	RP	CDC20	ATGTACTGGCCGTGGCACTGGACAACAGTGTGTACCTGTGGAGTGCAAGCTCTGGTGACATCCTGCAGCTTTTGCAAATGGAGCAGCCTGGGGAATATATATCCTCTGTGGCCTGGATCAAAGAGGGCAACTACTTGGCTGTGGGCACCAGCAGTGCTGAGGTGCAGCTATGGGATGTGCAGCAGCAGAAACGGCTTCGAAATATGA	CDS
IP_063696.1	RP	CDC20	ATGCACCCATCCCCAATGCACCCCCTGCGCGCTGGCAGCGCAAAGCCAAGGAAGCCGCAGGCCCGGCCCCCTCACCCATGCGGGCCGCCAACCGATCCCACAGCGCCGGCAGGACTCCGGGCCGAACTCCTGGCAAATCCAGTTCCAAGGTTCAGACCACTCCTAGCAAACCTGGCGGTGACCGCTATATCCCCCATCGCAGTGCTGCCCAGATGGAGGTGGCCAGCTTCCTCCTGA	CDS
IP_063937.1	RP	ERI3	ATGTTCAATGCTAGCACCTTTACAGACTGGAGCAGCTCGATTTTCTTCGTATTTACTTTCAAGAGCAAGAAAAGTGCTGGGCTCCCACTTATTTTCTCCCTGTGGTGTTCCGGAGTTCTGCTCCATATCCACCAGAAAGCTGGCGGCCCACGGCTTTGGCGCATCCATGGCGGCAATGGTGTCCTTCCCTCCCCAGAGGTATCACTACTTTTTAGTGCTGGACTTTGA	CDS
IP_063968.1	RP	RNF220	ATGAAGGGCAGAGGGAAGGCTCCTGCATGGCTGAGGATGATGCTGTGGACATCGAGCATGAGAACAACAACCGCTTTGAGGAGTATGAGTGGTGTGGACAGAAGCGGATACGGGCCACCACTCTCCTGGAAGGTGGCTTCCGAGGCTCTGGCTTCATCATGTGCAGCGGCAAAGAGAACCCGGACAGTGATGCTGACTTGGATGTGGATGGGGATGACACTCTGGAGTATGGGAAGCCACAATACACAGAGGCTGATGTCATCCCCTGCACAGGCGAGGAGCCTGGTGAAGCCAAGGAGAGAGAGGCACTTCGGGGCGCAGTCCTAA	CDS
IP_063990.1	RP	KIF2C	ATGAAACAGCTTCGAATGAAGTTGTCTACAGGTTCACAGCAAGGCCACTGGTACAGACAATCTTTGAAGGTGGAAAAGCAACTTGTTTTGCATATGGCCAGACAGGAAGTGGCAAGACACATACTATGGGCGGAGACCTCTCTGGGAAAGCCCAGAATGCATCCAAAGGGATCTATGCCATGGCCTCCCGGGACGTCTTCCTCCTGA	CDS
IP_063992.1	RP	KIF2C	ATGGGAAGCTGTTTGACCTGCTCAACAAGAAGGCCAAGCTGCGCGTGCTGGAGGACGGCAAGCAACAGGTGCAAGTGGTGGGGCTGCAGGAGCATCTGGTTAACTCTGCTGATGATGTCATCAAGATGA	CDS
IP_064132.1	RP	PRDX1	ATGGGGAAGTGTGCCCAGCTGGCTGGAAACCTGGCAGTGATACCATCAAGCCTGATGTCCAAAAGAGCAAAGAATATTTCTCCAAGCAGAAGTGAGCGCTGGGCTGTTTTAGTGCCAGGCTGCGGTGGGCAGCCATGA	CDS
IP_064135.1	RP	AKR1A1	ATGCCTTTGAGCGGGGAGACAACCCCTTCCCCAAGAATGCTGATGGGACTATATGCTACGACTCCACCCACTACAAGGAGACTTGGAAGGCTCTGGAGGCACTGGTGGCTAAGGGGCTGGTGCAGGCGCTGGGCCTGTCCAACTTCAACAGTCGGCAGATTGATGACATACTCAGTGTGGCCTCCGTGCGTCCAGCTGTCTTGCAGGTGGAATGCCACCCATACTTGGCTCAAAATGAGCTAA	CDS
IP_064144.1	RP	NASP	ATGCTGTCCCCAGTGGAAATGAAGTTTCGGAAAACATGGAGGAGGAGGCTGAGAATCAGGCTGAAAGCCGGGCAGCAGTGGAGGGGACAGTGGAGGCTGGAGCTACAGTTGAAAGCACTGCATGTTAAGAGGGGGCACAGCCCTCCTCCCAAGGGAAAGTGTTTTTGTATATAA	CDS
IP_064233.1	MS and RP	PIK3R3	ATGTCTGGCTGGGAATTAAGAATGAGGATGCTGATGAGAACTATTTTATCAATGAGGAAGATGAAAACCTGCCCCATTATGATGAGAAAACCTGGTTTGTTGAGGATATCAATCGAGTACAAGCAGAGGACTTGCTTTATGGGAAACCTGATGGTGCATTCTTAA	CDS
IP_064292.1	RP	NSUN4	ATGTGCCTGAAGAGATCAGGGATGGAAATCAAGTTCGAGTTACCTCATGGGATGGCAGGAAATGGGGAGAACTGGAGGGGGACACCTATGACCGGGTGCTGGTGGATGTGCCCTGTACCACAGACCGCCACTCCCTTCATGAGGAGGAGAACAACATCTTTAAGCGGTCAAGGAAGAAGGAGCGACAGATATTGCCTGTGCTGCAAGTGCAGCTTCTTGCGGCTGGACTCCTTGCCACCAAACCAGGAGGCCATGTTGTCTATTCTACCTGCTCACTCTCACACTTACAGAACGAGTATGTGGTGCAAGGTGCCATTGAGCTCCTGGCCAATCAATACAGCATCCAGGTACAGGTGGAAGATCTGA	CDS
IP_064488.1	RP	CMPK1	ATGGGTTTCCAAGAAATCAAGACAACCTTCAAGGATGGAACAAGACCATGGATGGGAAGGCAGATGTATCTTTCGTTCTCTTTTTTGACTGTAATAATGAGATTTGTATTGAACGATGTCTTGAGAGGGGAAAGAGTAGTGGTAGGAGTGATGACAACAGAGAGAGCTTGGAAAAGAGAATTCAGACCTACCTTCAGTCAACAAAGCCAATTATTGACTTATATGAAGAAATGGGGAAAGTCAAGAAAATAG	CDS
IP_064615.1	RP	FAF1	ATGAGGCCTATCGCCTTTCACTTGAGGCTGACAGAGCAAAGAGGGAAGCTCACGAGAGAGAGATGGCAGAACAGTTTCGTTTGGAGCAGATTCGCAAAGAACAAGAAGAGGAACGTGAGGCCATCCGGCTGTCCTTAG	CDS
IP_064620.1	RP	CDKN2C	ATGATGCGGCCAGAGCAGGTTTCCTGGACACTTTACAGACTTTGCTGGAGTTTCAAGCTGATGTTAACATCGAGGATAATGAAGGGAACCTGCCCTTGCACTTGGCTGCCAAAGAAGGCCACCTCCGGGTGGTGGAGTTCCTGGTGA	CDS
IP_064648.1	RP	EPS15	ATGTGGAACAGGACCTTAAGGAGAAGGAAGATACTATTAAACAGAGGACAAGTGAGGTTCAGGATCTTCAAGATGAAGTTCAAAGGGAGAATACTAATCTGCAAAAACTACAGGCCCAGAAACAGCAGGTACAGGAACTCCTTGATGAACTGGATGAGCAGAAAGCCCAGCTGGAGGAGCAACTCAAGGAAGTCAGAAAGAAATGTGCTGAGGAGGCCCAACTGA	CDS
IP_064652.1	RP	EPS15	ATGATCCTTTTGCTCCTGGTGGAACAGTTGTTGCAGCAAGCGATTCAGCCACAGACCCCTTTGCTTCTGTTTTTGGGAATGAATCATTTGGAGGTGGATTTGCTGACTTCAGCACATTGTCAAAGGTCAACAATGAAGATCCTTTTCGTTCAGCCACATCGAGCTCTGTCAGCAACGTAG	CDS
IP_064653.1	RP	EPS15	ATGATCCATTTCAGCCTTTCCCAGGCAACGATAGCCCCAAAGAAAAAGATCCTGAAATATTTTGTGATCCATTCACTTCTGCTACTACCACTACCAATAAAGAGGCTGATCCAAGCAATTTTGCCAACTTCAGTGCTTATCCCTCTGAAGAAGATATGA	CDS
IP_064657.1	RP	EPS15	ATGATGGAATGCTTGACAGAGATGAGTTTGCAGTTGCCATGTTTTTGGTATACTGTGCACTGGAGAAAGAACCTGTGCCAATGTCCTTGCCTCCAGCCTTGGTGCCACCATCTAAGAGAAAAACGTGGGTTGTATCCCCTGCAGAAAAAGCTAAATATGATGAAATCTTCCTGA	CDS
IP_064663.1	MS and RP	OSBPL9	ATGCAGCAACTGAAGCAAAGCACAGGCTTGAAGAAAGACAAAGAGCAGAAGCCCGAGAAAGGAAGGAGAAGGAAATTCAGTGGGAGACAAGGTTATTTCATGAAGATGGAGAATGCTGGGTTTATGATGAACCATTACTGA	CDS
IP_064687.1	RP	NRD1	ATGCAATTGACCGTGAAGTTGAAGCTGTTGATAGTGAATATCAACTTGCAAGGCCTTCTGATGCAAACAGAAAGGAAATGTTGTTTGGAAGCCTTGCTAGACCTGGACATCCTATGGGAAAATTTTTTTGGGGAAATGCTGAGACGCTCAAGCATGAGCCAAGAAAGAATAATATTGATACACATGCTAGATTGA	CDS
IP_064689.1	RP	NRD1	ATGGGGGTAGTGATAATGCCTCAACTGATTGTGAACGCACTGTCTTTCAGTTTGATGTCCAGAGGAAGTACTTCAAGGAAGCTCTTGATAGATGGGCGCAGTTCTTCATCCACCCACTAA	CDS
IP_064690.1	RP	NRD1	ATGAAGGCAAAGGCAGCATTCTTTCTTTCCTTAGGAAAAAATGCTGGGCTCTTGCACTGTTTGGTGGAAATGGTGAGACAGGATTTGAGCAAAATTCTACTTATTCAGTGTTCAGCATTTCTATTACATTGA	CDS
IP_064715.1	RP	RAB3B	ATGGTAAAACTGGAGTCAAAGATGCCTCTGACCAGAATTTTGACTACATGTTTAAACTGCTTATCATTGGCAACAGCAGTGTTGGCAAGACCTCCTTCCTCTTCCGCTATGCTGATGACACGTTCACCCCAGCCTTCGTTAGCACCGTGGGCATCGACTTCAAGGTGA	CDS
IP_064743.1	RP	TXNDC12	ATGAAGAGGAACCCAAAGATGAAGATTTCAGCCCTGACGGGGGTTATATTCCACGAATCCTTTTTCTGGATCCCAGTGGCAAGGTGCATCCTGAAATCATCAATGAGAATGGAAACCCCAGCTACAAGTATTTTTATGTCAGTGCCGAGCAAGTTGTTCAGGGGATGA	CDS
IP_064752.1	RP	BTF3L4	ATGATGGGACAGTTATTCATTTCAACAATCCCAAAGTCCAAGCTTCCCTTTCTGCTAATACCTTTGCAATTACTGGTCATGCAGAAGCCAAACCAATCACAGAAATGCTTCCTGGAATATTAA	CDS
IP_064802.1	RP	PRPF38A	ATGCGCACAGCATCCATGGCACCAACCCTCAATATCTGGTGGAGAAGATCATTCGAACGCGAATCTATGAGTCCAAGTACTGGAAAGAGGAGTGCTTTGGACTTACAGCTGAACTTGTAG	CDS
IP_064803.1	RP	PRPF38A	ATGATGTGGAGTCCAGTGAAGAGGAAGAAGAGGAGGATGAGAAGTTGGAAAGAGTGCCATCACCTGATCACCGCCGGAGAAGCTACCGAGACTTGGACAAGCCCCGTCGCTCTCCCACACTGCGCTACAGGAGGAGTAGGAGCCGGTCTCCCAGAAGGCGGAGTCGATCTCCCAAAAGGAGAAGCCCCTCCCCTCGCCGAGAAAGGCATCGGAGCAAGAGTCCAAGACGTCACCGCAGCAGGTCCCGAGATCGGCGGCACAGATCCCGTTCCAAGTCCCCAGGTCATCACCGTAGTCACAGACACAGGAGCCACTCAAAGTCTCCCGAAAGGTCTAAGAAGAGCCACAAGAAGAGCCGGAGAGGGAATGAGTAATGGACTCAGTTTGGTTTTAGTCCAC…	CDS
IP_064846.1	RP	COA7	ATGATGGACAGGTTAATGAGGATGGCCAGCCTGACTTGGGAAAGGCCAGGGACTACTACACAAGGGCCTGTGATGGTGGCTATACTTCCAGTTGCTTCAACCTCAGTGCCATGTTCCTGCAGGGTGCCCCAGGCTTTCCCAAGGACATGGACCTGGCATGTAAATACTCCATGA	CDS
IP_065091.1	RP	MRPL37	ATGAGTGGGGCGTGCGCTCCACGCGGAAGTCGGAGCCTCCTCCCCTGGATAGGGTGTACGAGATCCCTGGACTGGAGCCCATCACCTTTGCGGGGAAGATGCACTTCGTGCCCTGGCTGGCGCGGCCGATCTTTCCGCCCTGGGACCGCGGCTACAAGGACCCAAGGTTCTACCGCTCGCCCCCTCTTCACGAGCATCCGCTGTACAAAGACCAGGCCTGCTATATCTTTCACCACCGTTGCCGCCTTCTCGAGGGTGTAA	CDS
IP_065246.1	MS	PRKAA2	ATGTGTCTGGAGGTGAATTATTTGACTACATCTGTAAGCATGGACGGGTTGAAGAGATGGAAGCCAGGCGGCTCTTTCAGCAGATTCTGTCTGCTGTGGATTACTGTCATAGGCATATGGTTGTTCATCGAGACCTGA	CDS
IP_065341.1	MS	HOOK1	ATGCATCTGCTACAAAAAGTTATGAGAATCTTGCTGCTGAGATTATGCCAGTGGAATATAGGGAGGTGTTTATTCGACTGCAACATGAAAATAAGATGCTTCGCTTACAGCAAGAAGGCTCTGAGAATGAACGTATTGAGGAACTTCAGGAGCAGCTAG	CDS
IP_065380.1	MS	NFIA	ATGAATTTCATCCTTTCATCGAAGCACTTCTGCCCCACGTCCGAGCCTTTGCCTACACATGGTTCAACCTGCAGGCCCGAAAACGAAAATACTTCAAAAAACATGAAAAGCGTATGTCAAAAGAAGAAGAGAGAGCCGTGA	CDS
IP_065468.1	RP	DOCK7	ATGATATTGAAGTTGTTTATAGTCCTCGGGACTGCAGAACTCTTGTTTCAGCTGTACCTGAAGAAAGTGAAATGGATCCACATGTTAGAGACTGTATAA	CDS
IP_065612.1	RP	JAK1	ATGGCGTCTGTGTCCGCGACGTGGAGAATATCATGGTGGAAGAGTTTGTGGAAGGGGGTCCTCTGGATCTCTTCATGCACCGGAAAAGCGATGTCCTTACCACACCATGGAAATTCAAAGTTGCCAAACAGCTGGCCAGTGCCCTGA	CDS
IP_065782.1	RP	MIER1	ATGAAGATTATATTCCATCAGAAGACTGGAAAAAGGAGATTATGGTGGGCTCCATGTTTCAAGCAGAAATTCCAGTTGGCATTTGTAGATACAAAGAAAATGAAAAAGTATATGAAAATGATGATCAGCTCCTGTGGGACCCTGAGTACTTACCAGAAGATAAAGTGA	CDS
IP_065868.1	RP	SERBP1	ATGAAGGTGCTGATGGGCAGTGGAAGAAGGGATTTGTTCTTCATAAATCAAAGAGTGAAGAGGCTCATGCTGAAGATTCGGTTATGGACCATCATTTCCGGAAGCCAGCAAATGATATAA	CDS
IP_066175.1	RP	RABGGTB	ATGTTAAAGGTCTACAGAAAGAAGATGGTTCTTTTGCTGGAGATATTTGGGGAGAAATTGACACAAGATTCTCTTTTTGTGCGGTGGCAACTTTGGCTTTGTTGGGGAAGCTTGATGCTATTAATGTGGAAAAGGCAATCGAATTTGTTTTATCCTGTATGA	CDS
IP_066177.1	RP	RABGGTB	ATGTTATTATCAAGTCAGATGCACCGGACACTTTGTTATTGGAGAAACATGCAGATTATATCGCATCCTATGGCTCAAAGAAAGATGATTATGAATACTGTATGTCTGAGTATTTGA	CDS
IP_066331.1	RP	FUBP1	ATGGGCCCCATGGTGTCCCAGGCCCCCATGGACCTCCTGGGCCTCCAGGGCCTGGAACTCCAATGGGACCATACAACCCTGCACCTTATAATCCTGGACCACCAGGCCCGGCTCCTCATGGTCCTCCAGCCCCATATGCTCCCCAGGGATGGGGAAATGCATATCCACACTGGCAGCAGCAGGCTCCTCCTGATCCAGCTAAGGCAGGAACGGATCCAAATTCAGCAGCTTGGGCTGCTTATTACGCTCACTATTATCAACAGCAAGCACAGCCACCACCAGCAGCCCCTGCAGGTGCACCAACTACAACTCAAACTAATGGACAAGGAGATCAGCAGAATCCAGCCCCAGCTGGACAGGTTGATTATACCAAGGCTTGGGAAGAGTACTACAAGAAAA…	CDS
IP_066336.1	RP	FUBP1	ATGGAGATCAACCAGATGCTAAGAAAGTTGCTCCTCAAAATGACTCTTTTGGAACACAGTTACCACCGATGCATCAGCAGCAAAGATCTGTAA	CDS
IP_066344.1	RP	DNAJB4	ATGGACAAGGAGGTACCTTCCGGTACACCTTTCATGGCGATCCTCATGCTACATTTGCTGCATTTTTCGGAGGGTCCAACCCCTTTGAAATTTTCTTTGGAAGACGAATGGGTGGTGGTAGAGATTCTGAAGAAATGGAAATAG	5'UTR
IP_066346.1	RP	DNAJB4	ATGGATATCCAAGAGACAGGAATTCTGTGGGGCCATCCCGCCTCAAACAAGATCCTCCAGTTATTCATGAACTTAGAGTATCACTTGAAGAGATATATAGTGGTTGTACCAAACGGATGA	CDS
IP_066498.1	RP	CTBS	ATGTTGGACAGAAAACTTGGAAATCTTATGATTGGTCACAGATTACAACTGTGGCAACATTTGGAAAATATGACTCAGAACTTATGTGCTACGCTCATTCAAAAGGAGCCAGAGTAG	CDS
IP_066575.1	MS	C1orf52	ATGAGGACAATGGTGATGATGCTCCACAGAATGCTAAGAAAGCTAGGCTTCTACCAGAAGGGGAGGAGACGTTGGAATCAGATGATGAAAAAGATGAGCATACTTCTAAAAAGCGCAAAGTAG	CDS
IP_066606.1	RP	CYR61	ATGCAGCAAGACCAAGAAATCCCCCGAACCAGTCAGGTTTACTTACGCTGGATGTTTGAGTGTGAAGAAATACCGGCCCAAGTACTGCGGTTCCTGCGTGGACGGCCGATGCTGCACGCCCCAGCTGACCAGGACTGTGAAGATGCGGTTCCGCTGCGAAGATGGGGAGACATTTTCCAAGAACGTCATGATGATCCAGTCCTGCAAATGCAACTACAACTGCCCGCATGCCAATGA	CDS
IP_066844.1	RP	LRRC8B	ATGCTTAGCAGATGCCCAGTCATCTTATCACATCTTAAAACCATGGTGGGACGTCTTCTGGTATTACATCACACTGATCATGCTGCTGGTGGCCGTGCTGGCCGGAGCTCTCCAGCTGACGCAGAGCAGGGTTCTGTGCTGTCTTCCATGCAAAGTGGAATTTGA	CDS
IP_066873.1	RP	LRRC8C	ATGGTGGGATGTGTTTACCGATTACCTCTCAGTAGCCATGCTCATGATCGGCGTGTTTGGATGTACTTTACAGGTCATGCAAGACAAGATAATCTGCCTTCCGAAAAGAGTGCAGCCTGCTCAGAACCACTCTTCCCTTTCGAATGTCTCTCAAGCAGTTGCCAGTACCACTCCACTGCCTCCACCTAA	CDS
IP_066886.1	RP	LRRC8D	ATGGTGGGATGTGTTTATGGATTACCTAGCTGTTGTTATGTTAATGGTAGCCATCTTTGCAGGAACCATGCAACTTACCAAAGATCAGGTGGTCTGTTTGCCAGTATTGCCATCTCCTGTAAATTCAAAGGCACATACACCACCAGGAAATGCCGAGGTCACCACCAACATCCCAAAGATGGAAGCAGCCACCAACCAAGACCAAGATGGGCGGACAACAAACGACATTTCCTTTGGGACATCTGCTGTGACACCTGA	CDS
IP_066894.1	RP	ZNF326	ATGAAGAGGAAGAAAAGCGGCGAATTGAGGCTCGGCGAGAGAAACAAAGGCGCAGAAGAGAAAAAAACAGTGAGAAATACGGAGATGGATACAGAATGGCATTTACATGTTCATTTTGTAAATTTCGAACATTTGAAGAAAAAGATATTGAACTGCATCTGGAAAGTTCTTCACATCAGGAAACATTAG	CDS
IP_067053.1	RP	MTF2	ATGAGGCTTGTGTGCAATGCCTTCAAAAGCCAATGCTATTTGGAGACAGATTTTATACGTTTATATGCTCTGTCTGCAGTTCTGGACCAGAATACCTCAAACGTCTACCATTACAGTGGGTAG	CDS
IP_067056.1	RP	MTF2	ATGAAAAATGGCTCTGTCGGCAGTGTGTTTTTGCAACAACAACAAAGAGGGGTGGTGCACTTAAGAAAGGACCAAATGCCAAAGCATTGCAAGTCATGA	CDS
IP_067057.1	RP	MTF2	ATGTGGATTTCACGGGTGCTTCCAGTGCAAAAGAAACTACCTCGTCTAGCATTTCCAGGCATTATGGATTATCTGACTCCAGAAAAAGAACGCGTACAGGAAGATCTTGGCCTGCTGCAATACCACATTTGCGGAGAAGAAGAGGTCGTCTTCCAAGAAGAGCACTCCAGACTCAGAACTCAGAAATTGTAA	CDS
IP_067115.1	RP	DNTTIP2	ATGAGCTTCTGCAGAAAGCCGTCATTACACCTGATTTTGAAAAAAACCACTGTGTTCCACCATATAGTGAATCAAAGTATCAACTTCAGAAAAAACGCAGAAAAGAACGACAAAAAACAGCAGGGGATGGCTGGTTTGGTATGA	CDS
IP_067202.1	RP	CNN3	ATGGGCTTGGGCGGCAAGTATATGATCCCAAATACTGTGCTGCTCCTACAGAACCTGTCATTCACAACGGAAGCCAAGGAACAGGAACAAATGGTTCGGAAATCAGTGATAGTGATTATCAGGCAGAATACCCTGATGAGTATCATGGCGAGTACCAGGATGACTACCCCAGAGATTACCAATATAGCGACCAAGGCATTGATTATTAGATCCACACAGAAGGAGCTCAGTATTTAG	CDS
IP_067203.1	RP	CNN3	ATGATCCCAAAATGCAAACTGACAAACCTTTTGACCAGACCACAATTAGTCTGCAGATGGGCACTAATAAAGGAGCCAGCCAGGCAGGGATGTTAG	CDS
IP_067468.1	RP	SLC30A7	ATGAATACAAACCACCCAAGTTCAATTTGTTCGGCAAGATCTCGGGCTGGTTTAGGTCTATACTGTCCGACAAGACTTCCCGGAACCTGTTTTTCTTCCTGTGCCTGA	CDS
IP_067556.1	RP	PRMT6	ATGGCGCGGAGCGGGAGGCGGCCCTGGAGCGACCCCGGAGGACTAAGCGGGAACGGGACCAGCTGTACTACGAGTGCTACTCGGACGTTTCGGTCCACGAGGAGATGA	CDS
IP_067645.1	RP	PRPF38B	ATGATAGGCGGCACAGAGATGACAAAAGAGATTCCAAGAAAGAGAAAAAACACAGTAGAAGCAGAAGCAGAGAAAGGAAACACAGAAGTAGGAGTCGAAGTAGAAATGCAGGGAAACGAAGTAGAAGTAGAAGCAAAGAGAAATCAAGTAAACATAAAAATGAAAGTAAAGAAAAATCAAATAAACGAAGTCGAAGTGGCAGTCAAGGAAGAACTGACAGTGTTGAAAAATCAAAAAAACGGGAACATAGTCCCAGCAAAGAAAAATCTAGAAAGCGTAGTAGAAGCAAAGAACGTTCCCACAAACGAGATCACAGTGATAGTAAGGACCAGTCAGACAAACATGATCGTCGAAGGAGCCAAAGTATAG	CDS
IP_067715.1	MS and RP	TAF13	ATGAGGAAGAAGACCCCACGTTTGAGGAAGAAAATGAAGAAATTGGAGGAGGTGCAGAAGGTGGACAGGGTAAAAGAAAGAGACTTTTTTCTAAAGAATTGCGATGTATGA	CDS
IP_067719.1	RP	TMEM167B	ATGGGATTCTGGTGTTTGGTTTGCTCTTTGTTTGCACCTGTGCCTACTTCAAGAAAGTACCTCGTCTCAAAACCTGGCTGCTATCAGAGAAGAAGGGTGTTTGGGGTGTGTTTTACAAAGCCGCTGTGA	CDS
IP_067775.1	RP	SARS	ATGCTACCATGTGCGCCACTACCCGTACCATCTGCGCCATCCTGGAGAACTACCAGACAGAGAAGGGCATCACTGTGCCTGAGAAATTGA	CDS
IP_067852.1	RP	PSMA5	ATGAGAAAGGACCCCAGCTGTTTCATATGGACCCATCTGGGACCTTTGTACAGTGTGATGCTCGAGCAATTGGCTCTGCTTCAGAGGGTGCCCAGAGCTCCTTGCAAGAAGTTTACCACAAGTCTATGA	CDS
IP_067938.1	MS	GNAT2	ATGTGGGAGGGCAGAGATCCGAGAGAAAGAAGTGGATCCACTGCTTCGAGGGAGTCACCTGCATCATTTTCTGTGCAGCCCTCAGTGCCTATGATATGGTGCTGGTGGAAGATGACGAAGTGA	CDS
IP_068006.1	RP	CSF1	ATGAAGAGCATGACAAGGCCTGCGTCCGAACTTTCTATGAGACACCTCTCCAGTTGCTGGAGAAGGTCAAGAATGTCTTTAATGAAACAAAGAATCTCCTTGACAAGGACTGGAATATTTTCAGCAAGAACTGCAACAACAGCTTTGCTGAATGCTCCAGCCAAGATGTGGTGA	CDS
IP_068022.1	RP	AHCYL1	ATGACATGCAGGAGTTCACCAAATTCCCCACCAAAACTGGCCGAAGATCTTTGTCTCGCTCGATCTCACAGTCCTCCACTGACAGCTACAGTTCAGCTGCATCCTACACAGATAGCTCTGATGATGAGGTTTCTCCCCGAGAGAAGCAGCAAACCAACTCCAAGGGCAGCAGCAATTTCTGTGTGA	5'UTR
IP_068127.1	MS	KCNA10	ATGTGTGTGGCTGGAAAGAAATGGAGGTTGCGCTGGTCAATTTTGATAATTCAGATGAAATCCAAGAAGAGCCAGGCTATGCCACAGACTTCGACTCAACCAGCCCAAAAGGCCGGCCTGGGGGCAGCTCCTTCTCCAACGGGAAGATCCTCATCAGCGAAAGCACCAACCATGAGACGGCCTTCTCCAAGCTTCCGGGAGACTATGCTGACCCCCCAGGGCCTGAGCCAGTGGTCCTAA	CDS
IP_068141.1	RP	CD53	ATGGCACGAGTGATTGGACCAGTGGCCCACCAGCATCTTGCCCCTCAGATCGAAAAGTGGAGGGTTGCTATGCGAAAGCAAGACTGTGGTTTCATTCCAATTTCCTGTATATCGGAATCATCACCATCTGTGTATGTGTGA	CDS
IP_068220.1	RP	ATP5F1	ATGCAATTGATACGGAGAAGTCACAACAGGCACTGGTTCAGAAGCGCCATTACCTTTTTGATGTGCAAAGGAATAACATTGCTATGGCTTTGGAAGTTACTTACCGGGAACGACTGTATAGAGTATATAAGGAAGTAA	CDS
IP_068267.1	RP	DDX20	ATGAGGAGTACTGGAGAGCTTACTACAGGGCATGGCAAGAATATTATGCTGCCGCTTCTCATTCATATTATTGGAATGCTCAGAGACATCCAAGTTGGATGGCAGCTTATCACATGA	CDS
IP_068337.1	RP	CAPZA1	ATGCACCCCCAGGGGAATTTAATGAAGTATTCAATGACGTTCGGCTACTACTTAATAATGACAATCTCCTCAGGGAAGGGGCAGCACATGCATTTGCCCAGTATAACATGGATCAGTTCACGCCTGTGA	CDS
IP_068338.1	RP	CAPZA1	ATGCTAAAACTATCGATGGGCAACAGACTATTATTGCATGTATTGAAAGCCACCAGTTTCAGCCTAAAAACTTCTGGAATGGTCGTTGGAGATCAGAGTGGAAGTTCACCATCACACCACCTACAGCCCAGGTGGTTGGCGTGCTTAAGATTCAGGTTCACTATTATGAAGATGGCAATGTTCAGTTGGTTAGTCATAAAGATGTACAGGATTCACTAA	CDS
IP_068339.1	RP	CAPZA1	ATGCAGAAAATGAGTATCAGACAGCAATTAGTGAAAACTATCAAACAATGTCAGATACCACATTCAAGGCCTTGCGCCGGCAGCTTCCAGTTACCCGCACCAAAATCGACTGGAACAAGATACTCAGCTACAAGATTGGCAAAGAAATGCAGAATGCTTAAAGGCTGA	CDS
IP_068359.1	RP	RHOC	ATGGTGCCTGTGGGAAGACCTGCCTCCTCATCGTCTTCAGCAAGGATCAGTTTCCGGAGGTCTACGTCCCTACTGTCTTTGAGAACTATATTGCGGACATTGAGGTGGACGGCAAGCAGGTGGAGCTGGCTCTGTGGGACACAGCAGGGCAGGAAGACTATGATCGACTGCGGCCTCTCTCCTACCCGGACACTGATGTCATCCTCATGTGCTTCTCCATCGACAGCCCTGACAGCCTGGAAAACATTCCTGAGAAGTGGACCCCAGAGGTGA	CDS
IP_068453.1	RP	PTPN22	ATGTACGTTGTTACCAAGAGGATGACAGTGTTCCCATATGCATTCACTGCAGTGCTGGCTGTGGAAGGACTGGTGTTATTTGTGCTATTGATTATACATGGATGTTGCTAA	CDS
IP_068502.1	RP	HIPK1	ATGCTGATGAGTATAATTTTGTCCGTTCATACGAGTGCTTTCAGCATAAGAATCACACCTGCCTTGTTTTTGAAATGTTGGAGCAGAACTTATATGATTTTCTAA	CDS
IP_068553.1	RP	TRIM33	ATGAAAGCTGCAAACAGTCAGGGCTCAGCAGCCTTGTTAATGGAAAGTCCCCAATTCGAAGCCTCATGCACAGGTCGGCAAGGATTGGAGGAGATGGCAACAATAAAGATGATGACCCAAATGAAGACTGGTGTGCTGTCTGCCAAAACGGAGGAGATCTCTTGTGCTGCGAAAAATGTCCAAAGGTCTTTCATCTAA	CDS
IP_068595.1	RP	CSDE1	ATGATAAGGAAATCTTTTTCCATTACAGTGAGTTCTCTGGTGATGTTGATAGCCTGGAACTGGGGGACATGGTCGAGTATAGCTTGTCCAAAGGCAAAGGCAACAAAGTCAGTGCAGAAAAAGTGA	CDS
IP_068597.1	RP	CSDE1	ATGATGTGGAATTCACAATCAAGGACAGAAATGGTAAAGAAGTTGCAACAGATGTCAGACTATTGCCTCAAGGAACAGTCATTTTTGAAGATATCAGCATTGAACATTTTGAAGGAACTGTAA	CDS
IP_068638.1	RP	NGF	ATGTCCCTGCAGGACACACCATCCCCCAAGCCCACTGGACTAAACTTCAGCATTCCCTTGACACTGCCCTTCGCAGAGCCCGCAGCGCCCCGGCAGCGGCGATAG	CDS
IP_068719.1	RP	ATP1A1	ATGACCGCTGGATCAACGATGTGGAAGACAGCTACGGGCAGCAGTGGACCTATGAGCAGAGGAAAATCGTGGAGTTCACCTGCCACACAGCCTTCTTCGTCAGTATCGTGGTGGTGCAGTGGGCCGACTTGGTCATCTGTAAGACCAGGAGGAATTCGGTCTTCCAGCAGGGGATGA	CDS
IP_068901.1	RP	WDR3	ATGAGGAGAGTGTGGCCAAAGAAGACCAACCAGCAGTTCCAGGAGAGACTCAAGGTGACAGTTACTTTACTGGAAAGAAAACTATTGAAACAGTGA	CDS
IP_068996.1	RP	PHGDH	ATGAGAATGTCATCAGCTGTCCCCACCTGGGTGCCAGCACCAAGGAGGCTCAGAGCCGCTGTGGGGAGGAAATTGCTGTTCAGTTCGTGGACATGGTGA	CDS
IP_069053.1	RP	NOTCH2	ATGGAGGGACCTGCTCTGACTACGTCAACAGTTACACTTGCAAGTGCCAGGCAGGATTTGATGGAGTCCATTGTGAGAACAACATCAATGAGTGCACTGAGAGCTCCTGTTTCAATGGTGGCACATGTGTTGATGGGATTAACTCCTTCTCTTGCTTGTGCCCTGTGGGTTTCACTGGATCCTTCTGCCTCCATGAGATCAATGAATGCAGCTCTCATCCATGCCTGA	CDS
IP_069269.1	RP	POLR3C	ATGAAGATGCTGCTGGGGAGCCCAAGGCCAAGAGACCAAAATATACTACAGATAACAAGGAGCCCATTCCAGATGATGGGATTTATTGGCAGGCCAACCTTGACAGATTCCACCAACACTTCCGTGACCAAGCCATTGTGA	CDS
IP_069356.1	RP	LIX1L	ATGAACATCCTTCCCGAAGAATCACTGATGAGTTCATCGAGAAGAGTGTCTCTGAGGCCCTGGCATCTTTTAATGGCAACAGGGAGGAAGCTGACAACCCAAATACAGGGATTGGTGCCTTCCGATTCATGCTGGAATCCAACAAGGGCAAATCAATGTTGGAGTTCCAGGAGCTAA	CDS
IP_069753.1	RP	SF3B4	ATGGATACACTGGCCCTCCACGACCCCCACCCTATGGCTACCAGCGGGGGCCTCTCCCTCCACCCAGACCCACTCCCCGGCCACCAGTTCCCCCTCGAGGCCCACTTCGAGGCCCTCTCCCTCAGTAAATTCACATTTTCCTTCCTCCTGTTACATTTTCCCAATATCTTTTCTATTCCTTGGACCAATCAGAGATGCTGTAGCTCCTTGGGGCAAAGGTACTAA	CDS
IP_069811.1	RP	PLEKHO1	ATGAGAAGTGTGAAGAGCTCCGGAAGTCCAAGAGCAGGAGCAAGAAAAATCATAGCAAGTTTACTCTTGCCCACTCCAAACAGCCCGGTAACACGGCACCCAACCTGA	CDS
IP_069813.1	RP	PLEKHO1	ATGGAAACCAGCAGCCTGCACCGCCCGAGAAGGTCGGCTGGGTCCGGAAATTCTGCGGGAAAGGGATTTTCAGGGAGATTTGGAAAAACCGCTATGTGGTGCTGA	CDS
IP_069879.1	RP	MRPS21	ATGGGCTCATTGAGGACATTAAGCATCGGCGGTATTATGAGAAGCCATGCTGCCGGCGACAGAGGGAAAGCTATGAAAGGTGCCGGCGGATCTACAACATGGAAATGGCTCGCAAGATCAACTTCTTGA	CDS
IP_069932.1	MS	ADAMTSL4	ATGAACGCAGCTGTGCCGCGGGTGCCAGGCCCCCAGCCTCCCCTGAACCCTGCCACGGCACCCCATGCCCCCCATACTGGGAGGCTGGCGAGTGGACATCCTGCAGCCGCTCCTGTGGCCCCGGCACCCAGCACCGCCAGCTGCAGTGCCGGCAGGAATTTGGGGGGGGTGGCTCCTCGGTGCCCCCGGAGCGCTGTGGACATCTCCCCCGGCCCAACATCACCCAGTCTTGCCAGCTGCGCCTCTGTGGCCATTGGGAAGTTGGCTCTCCTTGGAGCCAGTGCTCCGTGCGGTGCGGCCGGGGCCAGAGAAGCCGGCAGGTTCGCTGTGTTGGGAACAATGGTGATGAAGTGA	CDS
IP_069996.1	RP	CTSK	ATGCCTTCCAATATGTGCAGAAGAACCGGGGTATTGACTCTGAAGATGCCTACCCATATGTGGGACAGGAAGAGAGTTGTATGTACAACCCAACAGGCAAGGCAGCTAAATGCAGAGGGTACAGAGAGATCCCCGAGGGGAATGAGAAAGCCCTGA	CDS
IP_070008.1	MS	ARNT	ATGCAGGAATGGACTTGGCTCTGTAAAGGATGGGGAACCTCACTTCGTGGTGGTCCACTGCACAGGCTACATCAAGGCCTGGCCCCCAGCAGGTGTTTCCCTCCCAGATGA	CDS
IP_070012.1	RP	ARNT	ATGATGATCAGATGTCTAACGATAAGGAGCGGTTTGCCAGGTCGGATGATGAGCAGAGCTCTGCGGATAAAGAGAGACTTGCCAGGGAAAATCACAGTGAAATTGAACGGCGGCGACGGAACAAGATGA	CDS
IP_070025.1	RP	SETDB1	ATGTTCTTGTGGACCGAAAGTTTCAGCCCTATAAGCCTTTTTACTATATTTTGGACATCACTTATGGGAAGGAAGATGTTCCCCTATCCTGTGTCAATGAGATTGACACAACCCCTCCACCCCAGGTGGCCTACAGCAAGGAACGTATCCCGGGCAAGGGTGTTTTCATTAACACAGGCCCTGAATTTCTGGTTGGCTGTGACTGCAAGGATGGGTGTCGGGACAAGTCCAAGTGTGCCTGCCATCAACTAA	CDS
IP_070026.1	RP	SETDB1	ATGAAGATGATGATGTCCTCAGTATTGATTCAGGTGATGCTGGGAGCAGAACTCCAAAAGACCAGAAGCTCCGTGAAGCTATGGCTGCCTTAA	CDS
IP_070043.1	RP	CERS2	ATGGACGTGTCTACGCCAAAGCCTCAGATCTCTATATCACGCTGCCCCTGGCCTTGCTCTTCCTCATCGTTCGATACTTCTTTGAGCTGTACGTGGCTACACCACTGGCTGCCCTCTTGA	CDS
IP_070272.1	RP	POGZ	ATGTATGCATCAAAAGAACTGTCAAGAACTTCCTGCATAAAAAATGGAAGGAACAGGCTCGGGAAATGGCAGATACTGCATGTGATTCTGATGTCCTGCTTCAGCTGGTGCTTGTCTGGCTGGGTGAAGTGCTAG	CDS
IP_070314.1	MS	SNX27	ATGGAACAACGGTTACAGTCAGGGTTAAAAAGAACAGTACTACAGACCAAGTATATCAGGCTATCGCAGCAAAGGTTGGCATGGACAGTACGACAGTGA	CDS
IP_070333.1	RP	SNX27	ATGAGATGCAGCGATGGGACACAGATGAAGAAGGGATGGCCTTCTGTTTCGAATATGCACGAGGAGAGAAGAAGCCCCGATGGGTTAAAATCTTCACGCCATATTTCAATTACATGCATGAGTGCTTCGAGAGGGTGTTCTGCGAGCTCAAGTGGAGAAAAGAGAACATTTTCCAGATGGCGAGGTCACAGCAGAGAGATGTGGCCACCTAGCCTTTCCTTATCCCCTTCCCTTCCCTTCACCCCCATCCTCTTACTCCTTTCATGTCCCATTTCAGACAGAGTAACCATTAACAAAAAAGAAGAGAAAAAGTTAAAGTCGTTATATTCAAAAGCCCTAAACTAA	CDS
IP_070356.1	MS	CELF3	ATGCCAATGGCCTCATCGCCACCCCCATCACCCCATCCTCAGGAACCAGCACCCCTCCTGCCATCGCTGCCACGCCTGTCTCTGCCATTCCGGCTGCCCTGGGCGTCAACGGCTACAGCCCGGTGCCCACCCAGCCCACTGGGCAGCCTGCCCCTGATGCTCTGTATCCCAACGGGGTTCACCCCTACCCAGCCCAGAGCCCCGCGGCCCCCGTGGACCCCCTGCAGCAGGCCTACGCGGGGATGCAGCACTACACAGCCTACCCAGCAGCCTACAGCCTGGTTGCACCTGCGTTCCCGCAGCCTCCAGCCCTGGTCGCCCAGCAGCCCCCACCACCACCTCAACAGCAGCAGCAGCAGCAGCAGCAGCAACAGCAGCAGCAGCAAAGAGAAGGCCCTG…	CDS
IP_070712.1	RP	CHTOP	ATGCATATATGTCGAAAACAAAAGGACACCTGGATGCTGAGTTGGATGCCTACATGGCGCAGACAGATCCCGAAACCAATGATTGAAGCCTGCCCATCCTCCCATGAGAGACTCTTGTTAGTCAACACATCTGTAAATAACCTTGAGATAACAGATGAGAAGAAATCTGATTGA	CDS
IP_070728.1	RP	ILF2	ATGAGAAGCCACCAGAGAAGAAGGAAGGAGAGGAAGAAGAGGAGAATACAGAAGAACCACCTCAAGGAGAGGAAGAAGAAAGCATGGAAACTCAGGAGTGACATTCCCTTCACTCCTTTTCCTACCCAAGGGGGAAGACTGGAGCCTAAGCTGCCTGCTACTGGGCTTTACATGGTGACAGACATTTCCGTGGGATAG	CDS
IP_070746.1	RP	INTS3	ATGAGAGTTGCTATGACAATGCAGAGGCAGCCTTCAGTGACGATGAAGAGGATCTCAACAGCAAAGGAAAGAAGAGGGAGTTTCGCTTCCACCCTATCAAGGAGACAGTTGTGGAGGAGCCAGTTGATATCACCCCTTACCTTGACCAGTTGGATGAGTCCCTGA	CDS
IP_070775.1	RP	GATAD2B	ATGTGGTCCAGAAGACTCCAGTTGTACAGAATGCAGCATCTATTGTTCAGCCATCTCCTGCCCATGTGGGACAGCAGGGCCTATCTAAGCTTCCCTCTCGGCCTGGGGCCCAAGGGGTTGAACCTCAAAATTTGA	CDS
IP_070781.1	RP	GATAD2B	ATGAGTTACCCACCAAACAGGATGGCAGTGGTGTCAAGGGCTATGAAGAAAAACTTAACGGGAATCTCAGGCCTCATGGAGACAACAGGACTGCTGGAAGGCCAGGCAAAGAAAACATCAATGATGAGCCTGTGGATATGA	CDS
IP_070810.1	RP	CRTC2	ATGCTAAGAAGCTATCCTCATCCTCTTCCCGACCTCGGTCCTGTGAAGTCCCTGGAATTAACATCTTTCCATCTCCTGACCAGCCTGCCAATGTGCCTGTCCTCCCACCTGCCATGA	CDS
IP_070827.1	RP	SLC39A1	ATGCATGACACCTCTAGGCATCGGGCTGGGTGCAGCTCTGGCAGAGTCGGCAGGACCTCTGCACCAGCTGGCCCAGTCTGTGCTAGAGGGCATGGCAGCTGGCACCTTTCTCTATATCACCTTTCTGGAAATCCTGCCCCAGGAGCTGGCCAGTTCTGA	CDS
IP_070920.1	RP	UBAP2L	ATGCATCGGCCACCCCTTTCCAACAGCCGAGTGGATATGGGTCTCATGGATACAACACTGGAAGAAAATATCCACCCCCTTACAAGCATTTCTGGACGGCTGAGAGCTAATTTGGCCCAAGGCTGGGGGCTGTGTTTTGTGTGTGTGTATAAATTTGCACTGAAGTCTTGTTTCAGAAACCAGACCACTGAGGAGAGCCTGCTGAGCTGA	CDS
IP_070924.1	RP	UBAP2L	ATGATTCATCTAATCTGGATCCGTCTCAGGCTCCTTCTCTGGCCCAGCCTCTGGTGTTCAGTAATTCGAAGCAGACTGCCATATCACAGCCTGCTTCAGGGAACACATTTTCTCATCACAGTATGGTGA	CDS
IP_070925.1	RP	UBAP2L	ATGTCGGTGAAGCTAAAGGCGGCAGTACTACAGGCTCCCAGTTCTTGGAGCAATTCAAGACTGCCCAAGCCCTGGCTCAGTTGGCAGCTCAGCATTCTCAGTCTGGAAGCACCACCACCTCCTCTTGGGACATGGGCTCGACGACACAATCCCCATCACTGGTGCAGTATGATTTGA	CDS
IP_071052.1	RP	UBE2Q1	ATGTGGAGATGCTGGATCAACCCTTGCCAGCAGAGCAGTGCACACAGGAAGACGTGTCTTCAGAAGATGAAGATGAGGAGATGCCTGAGGACACAGAAGACTTAG	CDS
IP_071083.1	RP	ADAR	ATGGGAGTGCATTTGAGGATGGACTACGACATCCCTTTATTGTCAACCACCCCAAGGTTGGCAGAGTCAGCATATATGATTCCAAAAGGCAATCCGGGAAGACTAAGGAGACAAGCGTCAACTGGTGTCTGGCTGATGGCTATGACCTGGAGATCCTGGACGGTACCAGAGGCACTGTGGATGGGCCACGGAATGAATTGTCCCGGGTCTCCAAAAAGAACATTTTTCTTCTATTTAAGAAGCTCTGCTCCTTCCGTTACCGCAGGGATCTACTGA	CDS
IP_071139.1	RP	PBXIP1	ATGCCAGCCGCGGGGACCCAGCTCATGCTGGCTTGGCTGAGCTGGGCCACAGATTGGCCCAGAAACTGCAGGGCCTGGAGAACTGGGGCCAGGACCCTGGGGTCTCTGCCAATGCCTCAAAGGCCTGGCACCAGAAGTCCCACTTCCAGAATTCTAGGGAGTGGAGTGGAAAGGAAAAGTGGTGGGATGGGCAGAGAGACCGGAAGGCTGAGCACTGGAAACATAAGAAGGAAGAATCTGGCCGGGAAAGGAAGAAGAACTGGGGAGGTCAGGAGGACAGGGAGCCAGCAGGAAGGTGGAAGGAGGGCAGGCCAAGGGTGGAGGAGTCGGGGAGCAAGAAGGAGGGCAAGCGACAGGGCCCGAAGGAACCCCCAAGGAAAAGTGGTAGCTTCCACTCCT…	CDS
IP_071147.1	RP	PYGO2	ATGACTTCGGAGCCCCCAAAGTGGGGGTTGCAGCCCCTCCATTCCTTGGCAGTCCTGTGCCCTTCGGAGGCTTCCGTGTGCAGGGGGGCATGGCGGGCCAGGTACCCCCAGGCTACAGCACTGGAGGTGGAGGGGGCCCCCAGCCACTCCGTCGACAGCCACCCCCCTTCCCTCCCAATCCTATGGGCCCTGCTTTCAACATGCCCCCCCAGGGTCCTGGCTACCCACCCCCAGGCAACATGA	CDS
IP_071407.1	RP	MTX1	ATGGAGAGGTCATCTCAGTTCCACACAAGATCATCACCCACCTTCGAAAAGAGAAGTACAATGCTGATTATGATCTGTCAGCTCGGCAAGGGGCAGACACCCTGGCCTTCATGTCTCTCCTGGAGGAGAAGTTGCTCCCGGTGCTGGTACATACTTTTTGGATAG	CDS
IP_071444.1	RP	CLK2	ATGAGAAAGACCCTGACAACAAGAACCTCTGTGTCCAGATGTTTGACTGGTTTGACTACCATGGCCACATGTGTATCTCCTTTGAGCTTCTGGGCCTTAGCACCTTCGATTTCCTCAAAGACAACAACTACCTGCCCTACCCCATCCACCAAGTGCGCCACATGGCCTTCCAGCTGTGCCAGGCTGTCAAGTTCCTCCATGATAACAAGCTGA	CDS
IP_071500.1	RP	RUSC1	ATGCCTTTATCCTGGGCCTCCTCAACACCAAGCAGTTGGAGCTGTGGTTTTCCAGTCTCCAGGAAGATGCAGGCCTGCTCTCCCTCCTGTACCTGCCAACAGGATTTTTCTCCCTGGCCCGCGGTGGTTGTCCCTCCCTGTCCACAGAGCTGCTGCTCCTGCTGCAGCCATTGTCGGTGCTCACTTTCCACCTGGACCTGCTCTTTGAGCACCACCACCACCTGCCCCTGGGCCCACCTCAGGCCCCTGCCCCTCCAGGCCCACCTCCAGCTCTGCAGCAGACTATGCAAGCCATGCTGCACTTTGGGGGCCGGCTGGCCCAGAGCCTTCGGGGGACTTCCAAGGAAGCTGCTTCAGACCCCTCTGACTCTCCAAACCTTCCCACACCAGGGAGCTGGT…	CDS
IP_071646.1	RP	SYT11	ATGGCATCCCCTACAGCCAGCTGCAGGACCTGGTGCTGCACTTCCTTGTCCTCAGCTTTGACCGCTTCTCTCGGGATGATGTCATTGGCGAGGTCATGGTGCCACTGGCAGGGGTGGACCCCAGCACAGGCAAGGTACAACTGA	CDS
IP_071707.1	RP	SSR2	ATGATTCCTTCCCTCCAGAAGACTTTGGCATTGTGTCTGGAATGCTCAATGTCAAATGGGACCGGATTGCCCCTGCTAGCAATGTCTCCCACACTGTGGTCCTGCGCCCTCTCAAGGCTGGTTATTTCAACTTCACCTCGGCAACAATTACTTACCTGGCCCAGGAGGATGGGCCCGTTGTGA	CDS
IP_071748.1	RP	LMNA	ATGATCGCTTGGCGGTCTACATCGACCGTGTGCGCTCGCTGGAAACGGAGAACGCAGGGCTGCGCCTTCGCATCACCGAGTCTGAAGAGGTGGTCAGCCGCGAGGTGTCCGGCATCAAGGCCGCCTACGAGGCCGAGCTCGGGGATGCCCGCAAGACCCTTGACTCAGTAG	CDS
IP_071749.1	RP	LMNA	ATGAGACCCGACTGGTGGAGATTGACAATGGGAAGCAGCGTGAGTTTGAGAGCCGGCTGGCGGATGCGCTGCAGGAACTGCGGGCCCAGCATGAGGACCAGGTGGAGCAGTATAAGAAGGAGCTGGAGAAGACTTATTCTGCCAAGCTGGACAATGCCAGGCAGTCTGCTGAGAGGAACAGCAACCTGGTGGGGGCTGCCCACGAGGAGCTGCAGCAGTCGCGCATCCGCATCGACAGCCTCTCTGCCCAGCTCAGCCAGCTCCAGAAGCAGCTGGCAGCCAAGGAGGCGAAGCTTCGAGACCTGGAGGACTCACTGGCCCGTGAGCGGGACACCAGCCGGCGGCTGCTGGCGGAAAAGGAGCGGGAGATGGCCGAGATGCGGGCAAGGATGCAGCAGC…	CDS
IP_071882.1	MS	CCT3	ATGCACAGAACCAGCAGAGTCTCCCCTTTTCCTGAGCCAGAGTGCCAGGAACACTGTGGACGTCTTTGTTCAGAAGGGATCAGGTTGGGGGGCAGCCCCCAGTCCCTTTCTGTCCCAGCTCAGTTTTCCAAAAGACACTGA	3'UTR
IP_071883.1	RP	CCT3	ATGCCATGCAAGTGTGTCGCAATGTTCTCCTGGACCCTCAGCTGGTGCCAGGGGGTGGGGCCTCCGAGATGGCTGTGGCCCATGCCTTGA	CDS
IP_071884.1	RP	CCT3	ATGATGTTGGAACAGGAGCAGGCCTGTTGGAAATCAAGAAAATTGGAGATGAATACTTTACTTTCATCACTGACTGCAAAGACCCCAAGGCCTGCACCATTCTCCTCCGGGGGGCTAGCAAAGAGATTCTCTCGGAAGTAG	CDS
IP_071954.1	RP	APOA1BP	ATGGAGGAGATGGTCTGGTCTGTGCTCGACACCTCAAACTCTTTGGCTACGAGCCAACCATCTATTACCCCAAAAGGCCTAACAAGCCCCTCTTCACTGCATTGGTGA	CDS
IP_072363.1	MS	SPTA1	ATGAACAGCGGCAGCTGCTGGGCAGTGCCCATGCTGTTGAAGTGTTTCACAGAGAAGCAGATGACACGAAGGAGCAGATTGAGAAGAAATGCCAGGCCCTCAGTGCTGCAGACCCTGGCTCAGATCTGTTCAGTGTTCAGGCTCTTCAGCGACGGCATGAGGGCTTTGAAAGGGACCTCGTACCCCTGGGAGATAAGGTGA	CDS
IP_072504.1	RP	TAGLN2	ATGATGGGCTCTTCTCTGGGGATCCCAACTGGTTCCCTAAGAAATCCAAGGAGAATCCTCGGAACTTCTCGGATAACCAGCTGCAAGAGGGCAAGAACGTGA	CDS
IP_072560.1	RP	IGSF8	ATGAGGGCCCTGCCCAGCAGAACTTCGAGTGGTTCCTGTATAGGCCCGAGGCCCCAGATACTGCACTGGGCATTGTCAGTACCAAGGATACCCAGTTCTCCTATGCTGTCTTCAAGTCCCGAGTGGTGGCGGGTGAGGTGCAGGTGCAGCGCCTACAAGGTGATGCCGTGGTGCTCAAGATTGCCCGCCTGCAGGCCCAGGATGCCGGCATTTATGAGTGCCACACCCCCTCCACTGATACCCGCTACCTGGGCAGCTACAGCGGCAAGGTGGAGCTGA	CDS
IP_072620.1	RP	PEX19	ATGATTTCGATAAAGCCAAACCCTCCCCAGCACCCCCTTCTACCACCACGGCCCCTGATGCTTCGGGGCCCCAGAAGAGATCGCCAGGAGACACTGCCAAAGATGCCCTCTTCGCTTCCCAAGAGAAGTTTTTCCAGGAACTATTCGACAGTGAACTGGCTTCCCAAGCCACTGCGGAGTTCGAGAAGGCAATGA	CDS
IP_072632.1	RP	COPA	ATGGGGTCATCCAGTTATGGGACTATCGGATGTGCACTCTCATTGACAAGTTTGATGAACATGATGGTCCAGTGCGAGGCATTGACTTCCATAAGCAGCAGCCACTGTTCGTCTCTGGAGGAGATGACTATAAGATTAAGGTTTGGAATTACAAGCTTCGGCGCTGTCTTTTCACATTGCTTGGGCACTTAG	CDS
IP_072634.1	RP	COPA	ATGCTTTATGTAACATTCATGAGAACATTCGTGTCAAGAGTGGGGCCTGGGATGAGAGTGGGGTATTTATCTATACCACAAGCAACCACATCAAATATGCTGTCACCACTGGGGACCACGGGATCATTCGAACTCTGGATTTACCCATCTATGTCACACGGGTGA	CDS
IP_072635.1	RP	COPA	ATGAGATCACCAAAAAGGTACAGGTGCCCAACTGTGATGAGATCTTCTATGCTGGCACAGGCAATCTCCTGCTTCGAGATGCGGACTCTATCACACTCTTTGACGTACAGCAGAAGCGGACTCTGGCATCTGTGA	CDS
IP_072824.1	RP	USF1	ATGATGCAGTTGACACGGAGGGGACAGCTGCTGAGACGCACTATACTTACTTCCCCAGCACGGCAGTGGGAGATGGGGCAGGGGGTACCACATCGGGGAGTACAGCTGCTGTTGTTACTACCCAGGGCTCAGAGGCACTGCTGGGGCAGGCGACCCCTCCTGGCACTGGTCAATTCTTTGTGA	CDS
IP_072847.1	RP	ARHGAP30	ATGGAGTGGTGGATGGGATCTACCGCCTCTCAGGGGTCTCCTCCAACATCCAGAAGCTTCGGCAGGAATTTGAGTCAGAGCGGAAGCCAGACCTGCGTCGGGATGTTTACCTCCAAGACATTCACTGCGTCTCCTCCCTGTGCAAGGCCTATTTCAGAGAACTGCCGGATCCCCTGCTCACTTACCGGCTCTATGACAAGTTTGCTGAGGCTGTAG	CDS
IP_072867.1	RP	PFDN2	ATGAAACTCGTAAGTGCTACCGCATGGTTGGAGGAGTGCTGGTGGAGCGAACTGTCAAAGAGGTGCTGCCCGCTTTGGAGAACAACAAGGAGCAGATACAGAAGATCATTGAGACACTGA	CDS
IP_072892.1	RP	DEDD	ATGTGCGCGTGCTTTCTTTCCTCTTTGTTGATGTCATTGATGACCACGAGCGTGGACTCATCCGAAATGGACGTGACTTCTTATTGGCACTGGAGCGCCAGGGCCGCTGTGATGAAAGTAACTTTCGCCAGGTGCTGCAGCTGCTGCGCATCATCACTCGCCACGACCTGCTGCCCTACGTCACCCTCAAGAGGAGACGGGCTGTGTGCCCTGATCTTGTAG	CDS
IP_072949.1	RP	NDUFS2	ATGCTGCTTATATCCGGCCAGGAGGAGTGCACCAGGACCTACCCCTTGGGCTTATGGATGACATTTATCAGTTTTCTAAGAACTTCTCTCTTCGGCTTGATGAGTTGGAGGAGTTGCTGA	CDS
IP_072951.1	RP	NDUFS2	ATGGCAGCAGCCGCCCTTATCGATGCAAGATCAAGGCTCCTGGTTTTGCCCATCTGGCTGGTTTGGACAAGATGTCTAAGGGACACATGTTGGCAGATGTCGTTGCCATCATAG	CDS
IP_072952.1	RP	NDUFS2	ATGATGTTTACGACCAGGTTGAGTTTGATGTTCCTGTTGGTTCTCGAGGGGACTGCTATGATAGGTACCTGTGCCGGGTGGAGGAGATGCGCCAGTCCCTGA	CDS
IP_073028.1	MS	C1orf192	ATGAAAAGGCTTTCTCATCCAAGTATCTGCAGAACTGGTCTCCCACTAAGCCAACAAAAGAGAGCATCTCTTCTCATGAAGGCTACACTCAAATTATTGCCAACGATCGTGGTCATCTACTGCCTTCTGTGCCCCGTTCCAAGGCAAATCCTTGGGGTTCCTTCATGGGCACCTGGCAAATGCCTCTGA	CDS
IP_073394.1	RP	TMCO1	ATGGTAGAGTGGTGGCAAAGCTTCCTTTTACCCCTCTTTCTTACATCCAAGGACTGTCTCATCGAAATCTGCTGGGAGATGACACCACAGACTGTTCCTTCATTTTCCTGTATATTCTCTGTACTATGTCGATTCGACAGAACATTCAGAAGATTCTCGGCCTTGCCCCTTCACGAGCCGCCACCAAGCAGGCAGGTGGATTTCTTGGCCCACCACCTCCTTCTGGGAAGTTCTCTTGAACTCAAGAACTCTTTATTTTCTATCATTCTTTCTAGACACACACACATCAGACTGGCAACTGTTTTGTAG	CDS
IP_073705.1	RP	NME7	ATGATGCTATATGTGAATGGAAAAGACTGCTGGGACCTGCAAACTCTGGAGTGGCACGCACAGATGCTTCTGAAAGCATTAGAGCCCTCTTTGGAACAGATGGCATAA	CDS
IP_073803.1	RP	KIFAP3	ATGAGAGTGAGCAGTACTTGTATGGTGATGATCGAATTGAGCCATACATTCATGAAGGAGATATTCTCGAAAGACCTGACCTTTTCTACAACTCAGATGGATTAA	CDS
IP_073823.1	MS	GORAB	ATGGATCAACCTCATTACTTCCAGAGCAGCTGCTTTCAGCACCAAAACAGAGAGTTAACGTTCAAAAACCACCTTTTTCTTCCCCTACTCTTCCGAGTCATTTCACTCTCACCTCCCCCGTTGGTGATGGACAACCACAGGGCATTGAAAGTCAGCCAAAGGAACTGGGACTTGAGAATTCCCATGATGGTCACAACAATGTTGAGATTCTACCTCCAAAGCCAGATTGCAAATTGGAGAAAAAGAAAGTGGAATTGCAAGAAAAATCTCGTTGGGAAGTCCTCCAACAAGAACAACGGCTAA	CDS
IP_073904.1	RP	PRRC2C	ATGGATTACAGAGTCTTGGAAAAGTCGGTATTTCACGGCGTATGCCTCCACCTGCTAACCTCCCAAGTCTTAAAGCAGAAAACAAAGGCAATGATCCTAATGTAA	CDS
IP_073910.1	MS and RP	PRRC2C	ATGGTCCACCCAAATCAGGAAGGAATTTCTCAGGTCCTAGAAATGAAAGGAGAAGTGGCCCACCATCAAAAAGTGGGAAGAGAGGGCCATTTGATGACCAGCCTGCAGGCACAACTGGGGTTGACCTCATCAATGGCAGCTCTGCACACCATCAGGAAGGAGTACCTAATGGTACAGGACAAAAGAACTCCAAAGATTCTACTGGGAAAAAAAGAGAAGACCCCAAACCAGGCCCTAAAAAACCAAAAGAGAAAGTGGATGCTCTATCACAGTTTGATCTCAACAATTATGCAAGTGTTGTTATAA	CDS
IP_073911.1	RP	PRRC2C	ATGGAGGGCGTGGCAGGGGTGGTAGGGGACACACTCGAGATTATCCTCAGTATAGAGACAATAAGCCAAGAGCAGAGCATATACCCTCAGGGCCTCTCAGACAGCGAGAAGAAAGTGAAACACGGAGTGAGAGCTCTGATTTTGAAGTTGTCCCCAAAAGAAGACGACAGCGGGGTTCAGAGACTGACACAGACAGTGAAATTCATGAAAGTGCAAGTGACAAGGACAGTTTAA	CDS
IP_073946.1	RP	VAMP4	ATGCAAAATAAAAGCCATCATGGCTTTGGTTGCTGCTATCCTTTTGCTAGTGATTATCATTCTTATAGTCATGAAATACCGTACTTGATTTGA	CDS
IP_074044.1	RP	PRDX6	ATGCTTACAATTGTGAAGAGCCCACAGAAAAGTTACCTTTTCCCATCATCGATGATAGGAATCGGGAGCTTGCCATCCTGTTGGGCATGCTGGATCCAGCAGAGAAGGATGAAAAGGGCATGCCTGTGA	CDS
IP_074045.1	RP	PRDX6	ATGGGGCATTCTCTTCTCCCACCCTCGGGACTTTACCCCAGTGTGCACCACAGAGCTTGGCAGAGCTGCAAAGCTGGCACCAGAATTTGCCAAGAGGAATGTTAA	CDS
IP_074058.1	RP	KLHL20	ATGGTGCATGGAAGGAAAGCCAATGCGCAGGTGTACCAACATTCGACCAGGAGAGACTGGAATGGATGTAACAAGCCGCTGCACCCTTGGAGACCCCAACAAACTGCCAGAAGGGGTTCCCCAACCTGCCCGCATGCCCTATATCTCAGACAAGCACCCTCGACAAACCTTGGAAGTGATTAA	5'UTR
IP_074064.1	RP	KLHL20	ATGATGGATCCTCTTATCTCAATAGTGTTGAAAGGTATGACCCCAAAACAAACCAGTGGAGCAGTGATGTGGCCCCTACAAGCACCTGCAGGACAAGTGTTGGTGTAG	CDS
IP_074145.1	RP	RABGAP1L	ATGAGAAAGAATATCAGACAATGCGAGAGAGTCAGCTGCAACAGGAAGACCCAATGGATAGATACAAGAGGGAGAACCGAAGATTACAGGAGGCCAGCATGA	CDS
IP_074177.1	RP	MRPS14	ATGAATACGCAGATGAGAGGCTACGTATTAATTCACTCAGGAAGAATACCATTTTGCCAAAAATTCTTCAGGATGTGGCTGATGAAGAAATTGCTGCCCTCCCCCGGGATAGCTGTCCTGTTAGAATCAGAAATCGGTGTGTTATGA	CDS
IP_074213.1	RP	RFWD2	ATGAAGGCACTGTTATTTTATGGGATGGATTCACAGGACAGAGGTCAAAGGTCTATCAGGAGCATGAGAAGAGGTGTTGGAGTGTTGACTTTAATTTGA	CDS
IP_074435.1	RP	SOAT1	ATGCCTTTGCTGAGATGTTACGCTTTGGTGACAGGATGTTCTATAAGGATTGGTGGAACTCCACGTCATACTCCAACTATTATAGAACCTGGAATGTGGTGGTCCATGACTGGCTATATTACTATGCTTACAAGGACTTTCTCTGGTTTTTCTCCAAGAGATTCAAATCTGCTGCCATGTTAG	CDS
IP_074594.1	RP	XPR1	ATGAAAGTAAGGGCCTGTTGCCAAATAATTCAGAAGAATCAGGAATTTGCCACAAATATACATATGGTGTGCGGGCCATTGTTCAGTGCATTCCTGCTTGGCTTCGCTTCATCCAGTGCCTGCGCCGATATCGAGACACAAAAAGGGCCTTTCCTCATTTAG	CDS
IP_074632.1	RP	MR1	ATGGAGACATTCTTCCCAGTGGGGATGGAACCTATCAGGCGTGGGCATCAATTGAGCTTGATCCTCAGAGCAGCAACCTTTACTCCTGTCATGTGGAGCACTGCGGTGTCCACATGGTTCTTCAGGTCCCCCAGGAATCAGAAACTATCCCTCTTGTGA	CDS
IP_074634.1	RP	MR1	ATGTGGCTCACACCATCAAGCAGGCATGGGAGGCCAATCAGCATGAGTTGCTGTATCAAAAGAATTGGCTGGAAGAAGAATGTATTGCCTGGCTAA	CDS
IP_074648.1	RP	MR1	ATGTATTGCCTGGCTAAAGAGATTCCTGGAGTATGGGAAAGACACCCTACAAAGAACAGAGCCCCCACTGGTCAGAGTAAATCGCAAAGAAACTTTTCCAGGGGTTACAGCTCTCTTCTGCAAAGCTCATGGCTTTTACCCCCCAGAAATTTACATGACATGGATGAAAAACGGGGAAGAAATTGTCCAAGAAATTGA	CDS
IP_074728.1	RP	GLUL	ATGGTACTGGAGAAGGACTGCGCTGCAAGACCCGGACCCTGGACAGTGAGCCCAAGTGTGTGGAAGAGTTGCCTGAGTGGAATTTCGATGGCTCTAGTACTTTACAGTCTGAGGGTTCCAACAGTGACATGTATCTCGTGCCTGCTGCCATGTTTCGGGACCCCTTCCGTAAGGACCCTAACAAGCTGGTGTTATGTGAAGTTTTCAAGTACAATCGAAGGCCTGCAGAGACCAATTTGA	CDS
IP_074798.1	RP	DHX9	ATGTTGTTCAGGCTTATCCTGAAGTTCGCATTGTTCTTATGTCTGCTACTATTGATACCAGCATGTTTTGTGAATATTTCTTCAATTGCCCCATCATTGAAGTTTATGGGAGGACTTACCCAGTTCAAGAATATTTTCTGGAAGACTGCATTCAGATGA	CDS
IP_074799.1	RP	DHX9	ATGCTACCGTATGGGCATCAAAAACAAACCTTGAGCAACGGAAAGGGCGAGCTGGCCGAGTACGGCCTGGATTCTGCTTTCACCTGTGCAGCCGAGCTCGTTTTGAGAGACTTGAAACCCACATGA	CDS
IP_074801.1	RP	DHX9	ATGTTGTTATCTCCCTCCTGGCCTTTGGTGTGTACCCCAATGTATGCTATCATAAGGAAAAGAGGAAGATTCTCACCACTGAAGGGCGTAATGCACTTATCCACAAATCATCTGTTAATTGTCCTTTTAGTAGCCAAGACATGA	CDS
IP_074811.1	RP	LAMC1	ATGACCGGCCGTGGAGGAGGGCAACTGCGGAAAGTGCCAGTGAATGCCTGCCCTGTGATTGCAATGGTCGATCCCAGGAATGCTACTTCGACCCTGAACTCTATCGTTCCACTGGCCATGGGGGCCACTGTACCAACTGCCAGGATAACACAGATGGCGCCCACTGTGAGAGGTGCCGAGAGAACTTCTTCCGCCTTGGCAACAATGAAGCCTGCTCTTCATGCCACTGTAGTCCTGTGGGCTCTCTAA	CDS
IP_074812.1	RP	LAMC1	ATGAATGTAATATTGAAACAGGAAGATGTGTTTGCAAAGACAATGTCGAAGGCTTCAATTGTGAAAGATGCAAACCTGGATTTTTTAATCTGGAATCATCTAATCCTCGGGGTTGCACACCCTGCTTCTGCTTTGGGCATTCTTCTGTCTGTACAAACGCTGTTGGCTACAGTGTTTATTCTATCTCCTCTACCTTTCAGATTGATGAGGATGGGTGGCGTGCGGAACAGAGAGATGGCTCTGAAGCATCTCTCGAGTGGTCCTCTGAGAGGCAAGATATCGCCGTGA	CDS
IP_074831.1	RP	LAMC2	ATGCCAGTGACAAGACCCAGCAAGCAGAAAGAGCCCTGGGGAGCGCTGCTGCTGATGCACAGAGGGCAAAGAATGGGGCCGGGGAGGCCCTGGAAATCTCCAGTGAGATTGAACAGGAGATTGGGAGTCTGA	CDS
IP_074834.1	RP	LAMC2	ATGAGTTCAAGCGTACACAGAAGAATCTGGGAAACTGGAAAGAAGAAGCACAGCAGCTCTTACAGAATGGAAAAAGTGGGAGAGAGAAATCAGATCAGCTGCTTTCCCGTGCCAATCTTGCTAAAAGCAGAGCACAAGAAGCACTGA	CDS
IP_074835.1	RP	LAMC2	ATGTCCTGTTGGGTACAAGGGGCAATTCTGCCAGGATTGTGCTTCTGGCTACAAGAGAGATTCAGCGAGACTGGGGCCTTTTGGCACCTGTATTCCTTGTAA	CDS
IP_074900.1	RP	NCF2	ATGAAGAATGGCTGGAAGGGGAGTGCAAAGGGAAGGTGGGCATTTTCCCCAAAGTTTTTGTTGAAGACTGCGCAACTACAGATTTGGAAAGCACTCGGAGAGAAGTCTAGGATGTTTCACAAACTACAAAGCTGA	CDS
IP_074908.1	RP	ARPC5	ATGAATATGACGAGAACAAGTTCGTGGACGAAGAAGATGGGGGCGACGGCCAGGCCGGGCCCGACGAGGGCGAGGTGGACTCCTGCCTGCGGCAAGGAAACATGA	CDS
IP_074915.1	MS	RGL1	ATGGGCTTCCCAACACGATCTCCTTCAGCCTGGAAGAGGAAGAGGAACTGGAGGGTGGAGAGTCAGCAGAATTCACGTGCTTCTCAGAAGATCTCGTGGCAGAGCAGCTGA	CDS
IP_075057.1	RP	IVNS1ABP	ATGGACAGGCTGAGGTGTTTGGCAGTGATGATGACCACATTCAGTTTGTGCAGAAAAAGCCACCACGTGAGAATGGCCATAAGCAGATAA	CDS
IP_075135.1	MS and RP	TPR	ATGATGAAGAAGAGGATGATGATGAAAATGATGGAGAACATGAGGATTATGAAGAGGATGAGGAAGATGATGATGATGATGAAGATGACACAGGGATGGGAGATGAGGGTGAAGATAGTAATGAAGGAACTGGTAGTGCCGATGGCAATGATGGTTATGAAGCTGATGATGCTGAGGGTGGTGATGGGACTGATCCAGGTACAGAAACAGAAGAAAGTATGGGTGGAGGTGAAGGTAATCACAGAGCTGCTGATTCTCAAAACAGTGGTGAAGGAAATACAGGTGCTGCAGAATCTTCTTTTTCTCAGGAGGTTTCTAGAGAACAACAGCCATCATCAGCATCTGAAAGACAGGCCCCTCGAGCACCTCAGTCACCGAGACGCCCACCACATCCACTTC…	CDS
IP_075175.1	RP	PTGS2	ATGACCAGAAATACAACTATCAACAGTTTATCTACAACAACTCTATATTGCTGGAACATGGAATTACCCAGTTTGTTGAATCATTCACCAGGCAAATTGCTGGCAGGGTTGCTGGTGGTAGGAATGTTCCACCCGCAGTACAGAAAGTATCACAGGCTTCCATTGACCAGAGCAGGCAGATGA	CDS
IP_075267.1	RP	CDC73	ATGTTGTTTGGGGGACTGGAAAGGAAGGCCAACCCAGAGAGTACTACACATTGGATTCCATTTTATTTCTACTTAATAACGTGCACCTTTCTCATCCTGTTTATGTCCGACGTGCAGCTACTGAAAATATTCCTGTGGTTAGAAGACCTGATCGAAAAGATCTACTTGGATATCTCAATGGTGAAGCGTCAACATCGGCAAGTATAG	CDS
IP_075516.1	RP	NEK7	ATGAGCAATCACAAGGAATGCAAGGGCCACCTGTTCCTCAGTTCCAACCACAGAAGGCCTTACGACCGGATATGGGCTATAATACATTAG	CDS
IP_075534.1	RP	PTPRC	ATGCCAGCTATATTGATGGTTTCAAAGAACCCAGGAAATACATTGCTGCACAAGGTCCCAGGGATGAAACTGTTGATGATTTCTGGAGGATGA	CDS
IP_075536.1	RP	PTPRC	ATGTGGAGCCAATCCATGCAGATATTTTGTTGGAAACTTATAAGAGGAAGATTGCTGATGAAGGAAGACTTTTTCTGGCTGAATTTCAGAGCATCCCGCGGGTGTTCAGCAAGTTTCCTATAA	CDS
IP_075588.1	RP	KIF14	ATGAGAGTAATGGTAGTAACAGGGGTGAAGATGCCTTTTGTGATCCTGAAGATGAATGGGAACCCGACATTACAGATGCACCAGTTTCTTCACTTTCTAGAAGGAGGAGTAGGAGTTTGA	CDS
IP_075601.1	MS	CAMSAP2	ATGTACCTGTTGAAAAATATGATGGAGAAAGTGATAAAGAACAATTTGATGATGACCAGAAAGTATGCTGTGGATTCTTTTTTAAGGATGATCAAAAAGCAGAAAATGATATGGCAATGA	CDS
IP_076044.1	RP	KDM5B	ATGCTTTCCACACCAGTTGTGTGGCGGTACCCAGTATTTCACAGGGCCTGCGAATCTGGCTTTGTCCCCATTGTCGGAGGTCAGAGAAACCTCCATTAG	CDS
IP_076343.1	RP	PPP1R15B	ATGAGGATCGCAAAGGACCATGGGAAGAATTTGCAAGGGATGGATGCAGGTTCCAGAAACGAATTCAAGAAACAGAAGATGCTATTGGATATTGCTTGA	CDS
IP_076362.1	RP	PIK3C2B	ATGATGCGGAGATGTTGCGGGATGCCACCAGGGGCTGGAAGGAGGGCCGAGGGCCGCTGGACTTCAGCAAAGACACCTCTGGAAAACCCGTGGCCAGGAGCAAGACTATGCCCCCTCAGGTGCCCCCCCGCACCTATGCCTCCCGCTATGGCAACCGAAAGAATGCGACGCCTGGCAAGAACCGCCGGATTTCTGCAGCCCCGGTGGGCTCCCGGCCCCACACTGTTGCCAATGGCCATGAGTTGTTTGAGGTCTCAGAAGAGAGAGATGAGGAGGTTGCTGCATTTTGCCACATGCTGGATATCCTTCGATCTGGCTCTGACATCCAAGACTACTTCCTCACTGGCTATGTCTGGAGTGCTGTCACCCCTAGCCCAGAGCACCTCGGGGATGAGGTCA…	CDS
IP_076510.1	RP	RBBP5	ATGAAGATAAGAGTGAGCCTGAGCAGACAGGGGCTGATGCTGCAGAAGATGAGGAAGTGGATGTCACCAGCGTGGACCCTATTGCTGCCTTCTGTAGCAGTGATGAAGAGCTGGAAGATTCAAAGGCTCTATTGTATTTACCCATTGCCCCTGAGGTAG	CDS
IP_076552.1	MS	TMCC2	ATGGAGCTGGGCTGGAAGATGCCGCTTCCCACCTGCCGGGCGCGGACCTCCGGCCTGGGGAGACCACGGGTGCTAACTCTGCTGGCGGGCCAACTTCAGACGCCGGCGCTGCCGCGGCGCCCAACCCAGGTCCCCGAAGCAAGCCTCCTGATTTAA	CDS
IP_076632.1	RP	ELK4	ATGTGGAGAATGGAGGGAAAGATAAACCACCTCAGCCTGGTGCCAAGACCTCTAGCCGCAATGACTACATACACTCTGGCTTATATTCTTCATTTACTCTCAACTCTTTGA	CDS
IP_076676.1	RP	NUCKS1	ATGATGACGATAGTGACTATGGCAGTTCGAAAAAGAAAAACAAAAAGATGGTTAAGAAGTCCAAACCTGAAAGAAAAGAAAAGAAAATGCCCAAACCCAGACTAA	CDS
IP_076677.1	RP	NUCKS1	ATGATTCTCACTCAGCAGAGGATAGTGAAGATGAAAAAGAAGATCATAAAAATGTGCGCCAACAACGGCAGGCGGCATCTAAAGCAGCTTCTAAACAGAGAGAGATGCTCATGGAAGATGTGGGCAGTGAGGAAGAACAAGAAGAGGAGGATGAGGCACCATTCCAGGAGAAAGATTCCGGCAGCGATGAAGATTTCCTAA	CDS
IP_076680.1	RP	NUCKS1	ATGATGCAGATGAAGATTATGGAAGAGATTCGGGCCCTCCCACTAAGAAAATTCGATCATCTCCCCGAGAAGCTAAAAATAAGAGGCGATCTGGAAAGAATTCACAGGAAGATAGTGAGGACTCAGAAGACAAAGATGTGA	CDS
IP_077021.1	RP	CR2	ATGCCCAAGGCACATGGGAGCCATCTGCACCAGTCTGTGAAAAGGAATGCCAGGCCCCTCCTAACATCCTCAATGGGCAAAAGGAAGATAGACACATGGTCCGCTTTGACCCTGGAACATCTATAA	CDS
IP_077025.1	RP	CR2	ATGGAACCCTCCCCTGGCGGTTTGCAGATCCCGTTCACTTGCTCCTGTCCTTTGTGGTATTGCTGCAGGTTTGATACTTCTTACCTTCTTGATTGTCATTACCTTATACGTGATATCAAAACACAGAGCACGCAATTATTATACAGATACAAGCCAGAAAGAAGCTTTTCATTTAGAAGCACGAGAAGTATATTCTGTTGA	CDS
IP_077220.1	MS	SYT14	ATGTTGGCGGGTTTCCAGATCTTGGTTCAGAATACAGTACAAGGAAGAATTCACAAGATAAAATTTATAATTCCTACATGGACAAAGATGAGCATGGTTCATCCTCTGAAAGTGAAGATGAAGCGCTGGGTAAATATCATGAGGCCTTATCCAGAACACACAATTCCAGACTACCACTGGCAGATTCTAGACAAAGGAACTATGCTTGGGAAACAAGGCAGAAATACAGTCCTCTATCGGCAGAGTATGATGGATACAGTAGTGAAGCATCAATAG	CDS
IP_077308.1	RP	RCOR3	ATGGAGGGATGCTTGTATGGTCTCCATATCACAGTATCCCAGATGCCAAATTGGATGAATACATTGCAATTGCAAAGGAAAAGCATGGCTACAATGTGGAACAGGCACTTGGCATGTTGTTCTGGCATAAACATAACATTGAGAAGTCCCTTGCTGATCTCCCTAATTTCACTCCCTTTCCGGATGAGTGGACAGTGGAAGATAAAGTCCTATTTGAACAAGCCTTTAGTTTTCATGGAAAGAGCTTTCACAGGATTCAGCAAATGCTTCCAGATAAGACAATTGCAAGCCTTGTAA	CDS
IP_077396.1	RP	DTL	ATGAAGCTGCCTACATATGGAAGGTCTCCACACCCTGGCAACCTCCTACTGTGCTCCTGGGTCATTCTCAAGAGGTCACGTCTGTGTGCTGGTGTCCATCTGACTTCACAAAGATTGCTACCTGTTCTGATGACAATACACTAA	CDS
IP_077426.1	MS	NENF	ATGACACTACGGGTCTCACGGCCAAGGAACTGGAGGCCCTGGATGAGGTCTTCACCAAAGTGTACAAAGCCAAATACCCCATCGTCGGCTACACTGCCCGGAGAATTCTCAATGAGGATGGCAGCCCTAACCTGGACTTCAAGCCTGAAGACCAGCCCCATTTTGACATCAAGGATGAGTTCTGATGTTCCCCCTGCAGGAGCAGGTTCTTGGGAGCGTGAGGCAGGAAGACACTAG	CDS
IP_077451.1	RP	BATF3	ATGATGACAGGAAGGTCCGAAGGAGAGAAAAAAACCGAGTTGCTGCTCAGAGAAGTCGGAAGAAGCAGACCCAGAAGGCTGACAAGCTCCATGAGGAATATGAGAGCCTGGAGCAAGAAAACACCATGCTGCGGAGAGAGATCGGGAAGCTGA	CDS
IP_077496.1	RP	TATDN3	ATGATGTGTTGGAGAAAGCCAAGAAGGCCAATGTTGTGGCCCTTGTGGCAGTTGCCGAACATTCAGGAGAATTTGAAAAGATTATGCAACTTTCAGAAAGGTATAATGGGTTTGTCCTGCCATGCTTGGGTGTTCATCCAGTTCAAGGACTTCCACCAGAAGACCAAAGAAGTGTCACACTAA	CDS
IP_077787.1	RP	RRP15	ATGTTGTCCAAGACAAAGAGACAGAGAGAAATCTTCAGAGAATTGCAACAAGGGGTGTGGTGCAATTATTTAATGCTGTTCAGAAACATCAAAAGAATGTTGATGAAAAGGTTAAGGAAGCTGGAAGTTCTATGA	CDS
IP_077829.1	RP	EPRS	ATGTTTCAACAACCAAAGCTCGAGTGGCACCTGAGAAAAAGCAAGATGTTGGGAAATTTGTTGAGCTTCCAGGTGCGGAGATGGGAAAGGTTACCGTCAGATTTCCTCCAGAGGCCAGTGGTTACTTACACATTGGGCATGCAAAAGCTGCTCTTCTGA	CDS
IP_077831.1	RP	EPRS	ATGATGGCCAAAGGAAAGACCCTTCTAAAAACCAAGGAGGTGGGCTCTCATCAAGTGGAGCAGGAGAAGGGCAGGGGCCTAAGAAACAGACCAGGTTGGGTCTTGAGGCAAAAAAAGAAGAAAATCTTGCTGATTGGTATTCTCAGGTCATCACAAAGTCAGAAATGA	CDS
IP_077834.1	RP	EPRS	ATGACACAAATCCTGAAAAAGAAAAGGAAGATTTTGAGAAGGTTATCTTGGAAGATGTTGCAATGTTGCATATCAAACCAGATCAATTTACTTATACTTCGGATCATTTTGAAACTATAA	CDS
IP_077854.1	RP	IARS2	ATGGATTTACCCTTGGAGAAAAGGGAGAAAAGATGTCCAAGTCTCTTGGGAATGTCATTCATCCTGATGTTGTCGTTAATGGAGGACAAGATCAAAGCAAAGAGCCTCCGTATGGTGCTGATGTCCTTCGCTGGTGGGTAG	CDS
IP_077937.1	MS	HHIPL2	ATGAAGCAGGGGAGCTGTATTTCCTGGCGACCTCTTACCCAAGTGCCTATGCACCACGTGGATCTATTTACAAGTTTGTTGACCCCTCAAGGCGAGCACCCCCAGGCAAGTGCAAATACAAGCCAGTGCCCGTGA	CDS
IP_078063.1	RP	CAPN2	ATGGGGATTTCTGCATCCGGGTCTTTTCTGAAAAGAAAGCTGACTACCAAGCTGTCGATGATGAAATCGAGGCCAATCTTGAAGAGTTCGACATCAGCGAGGATGACATTGATGATGGATTCAGGAGACTGTTTGCCCAGTTGGCAGGAGAGGATGCGGAGATCTCTGCCTTTGAGCTGCAGACCATCCTGA	CDS
IP_078103.1	RP	DEGS1	ATGAGATTGCCCACAATGCTGCCTTTGGCAACTGCAAAGCAATGTGGAATCGCTGGTTTGGAATGTTTGCTAATCTTCCTATTGGGATTCCATATTCAATTTCCTTTAAGAGGTATCACATGGATCATCATCGGTACCTTGGAGCTGATGGCGTCGATGTAG	CDS
IP_078296.1	RP	SDE2	ATGAGATGGCTGAGCGTCTGGAGGATTCCGTCCTCAAAGGTATGCAGGCTGCCTCCAGCAAGATGGTTTCAGCAGAAATCAGTGAGAATCGGAAACGGCAATGGCCTACTAAATCTCAAACAGACAGAGGAGCCAGTGCGGGAAAGAGGAGATGCTTCTGGTTGGGCATGGAGGGACTAG	CDS
IP_078315.1	RP	ACBD3	ATGCAGCCCAACAGTATCCAGGGAACTACGAACAGCAGCAAATTCTCATCCGCCAGTTGCAGGAGCAACACTATCAGCAGTACATGCAGCAGTTGTATCAAGTCCAGCTTGCACAGCAACAGGCAGCATTACAGAAACAACAGGAAGTAG	CDS
IP_078328.1	RP	LIN9	ATGTTTCACAATTCAAAGATCTCCCAGATGAAATTCCTTTGCCTCTGGTTATTGGAACGAAAGTTACAGCACGATTACGTGGTGTTCATGATGGTTTGTTCACTGGACAAATAG	CDS
IP_078342.1	RP	PARP1	ATGAAGAAAAAACCGGGAACGCTTGGCACTCCAAAAATTTCACGAAGTATCCCAAAAAGTTCTACCCCCTGGAGATTGACTATGGCCAGGATGAAGAGGCAGTGA	CDS
IP_078343.1	RP	PARP1	ATGGAAAAGTCCCACACTGGTACCACTTCTCCTGCTTCTGGAAGGTGGGCCACTCCATCCGGCACCCTGACGTTGAGGTGGATGGGTTCTCTGAGCTTCGGTGGGATGACCAGCAGAAAGTCAAGAAGACAGCGGAAGCTGGAGGAGTGA	CDS
IP_078817.1	RP	GALNT2	ATGAAATTGACCCCATTAAAAAGAAAGACCTTCATCACAGCAATGGAGAAGAGAAAGCACAAAGCATGGAGACCCTCCCTCCAGGGAAAGTACGGTGGCCAGACTTTAACCAGGAAGCTTATGTTGGAGGGACGATGGTCCGCTCCGGGCAGGACCCTTACGCCCGCAACAAGTTCAACCAGGTGGAGAGTGATAAGCTTCGAATGGACAGAGCCATCCCTGACACCCGGCATGACCAGTGTCAGCGGAAGCAGTGGCGGGTGGATCTGCCGGCCACCAGCGTGGTGA	CDS
IP_079061.1	MS	SIPA1L2	ATGATGACGGCTCGCCCCGAAGAGGGTGTTCAGAGCTCTGCCGGATCCCTATGGTGGAATATAAACTCGACAGCGAGGGCACCCCCTGCGAGTATAAAACCCCCTTCAGGAGGAACACCACGTGGCACCGGGTGCCCACTCCTGCCCTGCAGCCCCTCTCTAGAGCTTCCCCCATCCCCGGCACGCCCGACCGGCTGCCGTGCCAACAGCTGCTCCAGCAGGCCCAGGCTGCCATTCCTCGAAGCACCTCCTTCGACCGGAAGCTGCCCGATGGCACGAGAAGCTCACCCAGCAACCAGTCATCCTCCAGCGACCCTGGACCCGGCGGGAGCGGACCCTGGAGACCACAAGTGGGCTACGACGGGTGCCAGTCCCCTCTACTGCTCGAACACCAGGGCT…	CDS
IP_079149.1	RP	IRF2BP2	ATGCAGGGGGCAGTCATGCCTCAAAAGATGCCAACCAGGTTCACTCCACTACCAGGAGGAATAGCAACAGTCCGCCCTCTCCGTCCTCTATGA	CDS
IP_079166.1	RP	ARID4B	ATGAAAAATACTCTCCAAAAAACTGTAAACTTCGGCGCTTGTCCAAACCACCATTTCAGACAAATCCATCTCCTGAAATGGTATCCAAACTGGATCTCACTGATGCCAAAAACTCTGATACTGCTCATATTAAGTCCATAG	CDS
IP_079172.1	RP	ARID4B	ATGGTGATAAGGATCCTGATCTCAAGGAACCCAGTAATCGATTACCCAAAGTTTACAAATGGAGTTTTCAGATGTCGGACCTGGAAAATATGA	CDS
IP_079191.1	RP	TBCE	ATGTCATTGGTCGAAGAGTTGAAGTTAATGGAGAACATGCAACAGTACGTTTTGCTGGTGTTGTCCCTCCCGTGGCAGGACCCTGGTTAG	CDS
IP_079247.1	RP	LYST	ATGTCAACCGGCTTTGCAATGCAGTGGTCCAGAGGGTGGAGGCCAGGGAGGAAGAAGAGGAGGAGACGCACATGGCAACCCTTGGACAGTACCTTGTCCATGGTCGAGGATTTCTATTACTTACCAAGCTAA	CDS
IP_079288.1	MS	NID1	ATGGCATCATTGCTACGAGTGAACCCCCGGCCAAAGAATCCCATCCCGGGCTCTTCCCACCAACATTCGGTGCAGTCGCCCCTTTCCTGGCGGACTTGGACACGACCGATGGCCTGGGGAAGGTTTATTATCGAGAAGACTTATCCCCCTCCATCACTCAGCGAGCAGCAGAGTGTGTCCACAGAGGGTTCCCGGAGATCTCTTTCCAGCCTAGTAGCGCGGTGGTTGTCACTTGGGAATCCGTGGCCCCCTACCAAGGGCCCAGCAGGGACCCAGACCAGAAAGGCAAGAGAAACACGTTCCAGGCTGTTCTAG	CDS
IP_079374.1	RP	MTR	ATGAGGATGATGGTGACGACTACAGCAGCATCATGGTCAAGGCGCTGGGGGACCGGCTGGCAGAGGCCTTTGCAGAAGAGCTCCATGAAAGAGTTCGCCGAGAACTGTGGGCCTACTGTGGCAGTGAGCAGCTGGACGTCGCAGACCTGCGCAGGCTGCGGTACAAGGGCATCCGCCCGGCTCCTGGCTACCCCAGCCAGCCCGACCACACCGAGAAGCTCACCATGTGGAGACTCGCAGACATCGAGCAGTCTACAGGCATTAGGTTAA	CDS
IP_079517.1	MS and RP	FH	ATGAAGTACTGTTACCAGGACTACAGAAGTTACATGATGCTCTTGATGCAAAATCCAAAGAGTTTGCACAGATCATCAAGATTGGACGTACTCATACTCAGGATGCTGTTCCACTTACTCTTGGGCAGGAATTTAGTGGTTATGTTCAACAAGTAA	CDS
IP_079570.1	RP	EXO1	ATGAAGAAAGTGGTGCAGTTGTGGTTCCAGGGACCAGAAGCAGGTTTTTTTGCAGTTCAGATTCTACTGACTGTGTATCAAACAAAGTGA	CDS
IP_079676.1	RP	ADSS	ATGTGGCTGGCGGCCGCAGAGCAGTTCAGTTCGCTCACTCCTCGCCGGCCGCCTCTCCTTCGGGCTCTCCTCGCGTCACTGGAGCCATGGCGTTCGCCGAGACCTACCCGGCGGCATCCTCCCTGCCCAACGGCGATTGCGGCCGCCCCAGGGCGCGGCCCGGAGGAAACCGGGTGA	5'UTR
IP_079677.1	RP	ADSS	ATGGTATCCAGGAACAACAGAGACAAGAACAAGCAGGAAAAAATTTGGGTACAACAAAAAAGGGCATTGGCCCAGTTTATTCGTCCAAAGCTGCTCGGAGTGGACTCAGGATGTGCGACCTTGTTTCTGACTTTGATGGCTTCTCTGAGAGGTTTAAAGTTCTAG	CDS
IP_079722.1	RP	HNRNPU	ATGGCCGTGGATATTTTGAGTACATTGAAGAGAACAAGTATAGCAGAGCCAAATCTCCTCAGCCACCTGTTGAAGAAGAAGATGAACACTTCGATGACACAGTGGTTTGTCTTGATACTTATAATTGTGATCTACATTTTAAAATATCAAGAGATCGTCTCAGTGCTTCTTCCCTTACAATGGAGAGTTTTGCTTTTCTTTGGGCTGGAGGAAGAGCATCCTATGGTGTGTCAAAAGGCAAAGTGTGTTTTGAGATGA	CDS
IP_079723.1	RP	HNRNPU	ATGTTGAACTTCAGAAGGAAGAAGCCCAAAAACTCTTGGAGCAATATAAGGAAGAAAGCAAAAAGGCTCTTCCACCAGAAAAGAAACAGAACACTGGCTCAAAGAAAAGCAATAAAAATAAGAGTGGCAAGAACCAGTTTAACAGAGGTGGTGGCCATAGAGGACGTGGAGGATTCAATATGCGTGGTGGAAATTTCAGAGGAGGAGCCCCTGGGAATCGTGGCGGATATAATAGGAGGGGCAACATGCCACAGAGAGGTGGTGGCGGTGGAGGAAGTGGTGGAATCGGCTATCCATACCCTCGTGCCCCTGTTTTTCCTGGCCGTGGTAGTTACTCAAACAGAGGGAACTACAACAGAGGTGGAATGCCCAACAGAGGGAACTACAACCAGAACTTCA…	CDS
IP_079725.1	RP	HNRNPU	ATGCTAAGAATGGACAAGATCTTGGCGTTGCCTTCAAAATCAGTAAGGAAGTTCTTGCTGGACGGCCACTGTTCCCGCATGTTCTCTGCCACAACTGTGCAGTTGAATTTAATTTTGGTCAGAAGGAAAAGCCATATTTTCCAATACCTGAAGAGTATACTTTCATCCAGAACGTCCCCTTAG	CDS
IP_079731.1	RP	HNRNPU	ATGGAGTCAGCATTATCACCAAGGATATTATTGAATACCCAAATAAAACGAACTGATACATATTTCTCCAAAACCTTCACAAGAAGTCGACTGTTTTCTTTAGTAGGCTAA	CDS
IP_082759.1	RP	CPSF3	ATGTATTATTCTCGAGTTCAAAGGAAGAAAAATAATGCTCGACTGTGGGATCCACCCTGGCCTAGAAGGAATGGATGCTCTTCCTTATATTGA	CDS
IP_082768.1	MS and RP	ADAM17	ATGCTACTTGCAAAGGCGTGTCCTACTGCACAGGTAATAGCAGTGAGTGCCCGCCTCCAGGAAATGCTGAAGATGACACTGTTTGCTTGGATCTTGGCAAGTGTAAGGATGGGAAATGCATCCCTTTCTGCGAGAGGGAACAGCAGCTGGAGTCCTGTGCATGTAATGAAACTGACAACTCCTGCAAGGTGTGCTGCAGGGACCTTTCTGGCCGCTGTGTGCCCTATGTCGATGCTGAACAAAAGAACTTATTTTTGA	CDS
IP_082821.1	RP	RRM2	ATGAAAACTTGGTGGAGCGATTTAGCCAAGAAGTTCAGATTACAGAAGCCCGCTGTTTCTATGGCTTCCAAATTGCCATGGAAAACATACATTCTGAAATGTATAGTCTTCTTATTGACACTTACATAA	CDS
IP_082823.1	MS and RP	RRM2	ATGATATCTGGCAGATGTATAAGAAGGCAGAGGCTTCCTTTTGGACCGCCGAGGAGGTGGACCTCTCCAAGGACATTCAGCACTGGGAATCCCTGA	CDS
IP_082842.1	RP	ODC1	ATGCCCGCTGTGTTTTTGACATGGGGGCTGAGGTTGGTTTCAGCATGTATCTGCTTGATATTGGCGGTGGCTTTCCTGGATCTGAGGATGTGA	CDS
IP_083078.1	RP	DDX1	ATGCTGTCCGGGCAATCAAGGAACATAAGATGGATCAAGCAATTATCTTCTGTAGAACCAAAATTGACTGTGATAACTTGGAGCAGTACTTTATACAACAAGGAGGAGGACCTGATAAAAAAGGACACCAGTTCTCATGTGTTTGTCTTCATGGTGACAGAAAGCCTCATGAGAGAAAGCAAAACTTGGAAAGATTTAAGAAAGGAGATGTAA	CDS
IP_083079.1	RP	DDX1	ATGAATTTGATGGGAAAGTTACCTACGGTCAGAAAAGGGCTGCTGGTGGTGGAAGCTATAAAGGCCATGTGGATATTTTGGCACCTACTGTTCAAGAGTTGGCTGCCCTTGAAAAGGAGGCGCAGACATCTTTCCTGCATCTTGGCTACCTTCCTAACCAGCTGTTCAGAACCTTCTGATTTTTACATTTACTGA	CDS
IP_083129.1	RP	GEN1	ATGAACGTAATGGATGCAGATTATGTAAAAGTGATAAATATTGTGAGCCACATGACTATGAATACTGCTGTCCTTGTGAGTGGCACCGTACAGAACATGATAGGCAACTCAGTGAAGTAG	CDS
IP_083221.1	RP	PUM2	ATGGAAACCATGTTGTACAAAAATGTATCGAATGTGTTCAGCCACAGTCACTACAGTTCATCATTGATGCTTTCAAGGGACAAGTATTTGTGCTTTCAACTCATCCTTATGGCTGCAGAGTAA	CDS
IP_083222.1	RP	PUM2	ATGGCAGAGGTTTGCCAAATGGAATGGATGCCGATTGCAAAGATTTTAATCGTACTCCTGGAAGTCGTCAAGCCTCTCCAACTGAAGTAG	CDS
IP_083225.1	RP	PUM2	ATGATTCAACAAAAGATGGACAAAAAGGCATATTTCTTGGGGATGATGAATGGAGAGAGACTGCATGGGGAGCTTCTCACCATTCAATGTCCCAGCCTATTATGGTACAGAGAAGATCTGGACAGGGTTTTCATGGAAACAGTGAAGTAA	CDS
IP_083226.1	RP	PUM2	ATGGAGAGAGACTGCATGGGGAGCTTCTCACCATTCAATGTCCCAGCCTATTATGGTACAGAGAAGATCTGGACAGGGTTTTCATGGAAACAGTGA	CDS
IP_083236.1	RP	RHOB	ATGACGGCCGCGCCATGGCCGTGCGCATCCAAGCCTACGACTACCTCGAGTGCTCTGCCAAGACCAAGGAAGGCGTGCGCGAGGTCTTCGAGACGGCCACGCGCGCCGCGCTGCAGAAGCGCTACGGCTCCCAGAACGGCTGCATCAACTGCTGCAAGGTGCTATGAGGGCCGCGCCCGTCGCGCCTGCCCCTGCCGGCACGGCTCCCCCTCCTGGACCAGTCCCCCGCGAGCCCGGAGAAGGGGAGACCCGTGTCCCACAAGGACCCCACCGGCCTGCCTGGCATCTGTCTGCTGA	CDS
IP_083362.1	RP	SF3B14	ATGATATATTTGGGAAATATGGACCTATTCGTCAAATCAGAGTGGGGAACACACCTGAAACTAGAGGAACAGCTTATGTGGTCTATGAGGACATCTTTGATGCCAAGAATGCATGTGATCACCTATCGGGATTCAATGTTTGTAACAGATACCTTGTGGTTTTGTACTATAATGCCAACAGGGCATTTCAGAAGATGGACACAAAGAAGAAGGAGGAACAGTTGA	CDS
IP_083387.1	RP	ITSN2	ATGGAGAGTGGTGGACAGGAAGTATTGGAGATAGAAGTGGAATTTTTCCATCAAACTATGTCAAACCAAAGGATCAAGAGAGTTTTGGGAGTGCTAGCAAGTCTGGAGCATCAAATAAAAAACCTGAGATTGCTCAGGTAA	CDS
IP_083394.1	RP	ITSN2	ATGGGCTTTATCAGACCTAAACAAGGATGGGAAGATGGATCAGCAAGAGTTCTCCATAGCTATGAAACTCATCAAACTGAAGCTTCAAGGCCAACAGTTGCCTGTGGTTCTCCCTCCTATTATGAAGCAACCCCCTATGTTTTCTCCATTAATTTCTGCTCGTTTTGGAATGGGAAGCATGCCCAATCTGTCCATTCCTCAGCCATTGCCTCCAGCTGCACCTATAACATCATTGTCTTCTGCGACTTCAGGGACCAACCTTCCTCCCTTAATGATGCCCACTCCCCTAGTGCCTTCTGTTAG	CDS
IP_083442.1	RP	ADCY3	ATGAGATGCGACGCTGGAACGAGGCCTTGGTCACCAACATGTTGCCTGAGCACGTGGCACGCCATTTCCTGGGGTCCAAGAAGAGAGATGAGGAGCTGTATAGCCAGACGTATGATGAGATTGGAGTCATGTTTGCCTCCCTGCCCAACTTTGCTGACTTCTACACAGAGGAGAGCATCAACAATGGTGGTATTGAGTGTCTGCGTTTCCTCAATGAAATCATCTCAGATTTTGACTCTCTCCTGGACAATCCCAAGTTCCGGGTGA	CDS
IP_083504.1	RP	DNMT3A	ATGCTGTGGAAGAAAACCAGGGGCCCGGGGAGTCTCAGAAGGTGGAGGAGGCCAGCCCTCCTGCTGTGCAGCAGCCCACTGACCCCGCATCCCCCACTGTGGCTACCACGCCTGAGCCCGTGGGGTCCGATGCTGGGGACAAGAATGCCACCAAAGCAGGCGATGACGAGCCAGAGTACGAGGACGGCCGGGGCTTTGGCATTGGGGAGCTGGTGTGGGGGAAACTGCGGGGCTTCTCCTGGTGGCCAGGCCGCATTGTGTCTTGGTGGATGA	CDS
IP_083942.1	RP	GTF3C2	ATGGTGTCACTGTGGCTCAGGACAACTGCTATGCCTCTTATGGACTCTGTGGGATTCATTATATTGACGCTGGTTACCTTGGTTTCAAGGCCTACTTCACTGCTCCTCGAAAAGGCACCGTTTGGAGTCTTTCAGGATCCGACTGGCTTGGGACAATAG	CDS
IP_083947.1	RP	GTF3C2	ATGGCTGGTATCTGGGGGGCAGTCAGGGCTGGTTCGAATCCATTTTGTCCGTGGACTCGCCTCCCCACTGGGCCACCGTATGCAGCTTGA	CDS
IP_083960.1	RP	SNX17	ATGCCAGTGCCAGTGATGTCCACGGCAATTTCGCCTTCGAGGGCATTGGAGATGAGGATCTGTAATCTCCACTGCTTGGATGTCTGCCCTCTACCCCAGAGGAATTTACAGAAACTTGCCCTGTGCCTGTGTCCCCCATGCTAG	CDS
IP_083962.1	RP	SNX17	ATGGAGTCCTGCACTGTCGGGTGCGCTACAGCCAGCTCCTGGGGCTGCACGAGCAGCTTCGGAAGGAGTATGGGGCCAATGTGCTTCCTGCATTCCCCCCAAAGAAGCTTTTCTCTCTGA	CDS
IP_083982.1	RP	PPM1G	ATGAAAATGGGGAGCTTCGGTTATTGTCATCCATTGTGGAAGAGCTGCTGGATCAGTGCCTGGCACCAGACACTTCTGGGGATGGTACAGGGTGTGACAACATGA	CDS
IP_083985.1	RP	PPM1G	ATGCTCACAACTGTATTCCTGAGCTGGACAGTGAGACAGCCATGTTTTCTGTCTACGATGGACATGGAGGGGAGGAAGTTGCCTTGTACTGTGCCAAATATCTTCCTGATATCATCAAAGATCAGAAGGCCTACAAGGAAGGCAAGCTACAGAAGGCTTTAG	CDS
IP_083986.1	RP	PPM1G	ATGCTGGTGGCAAGGTCACCATGGATGGGCGAGTCAACGGGGGCCTCAACCTCTCCAGAGCCATTGGGGACCACTTCTATAAGAGAAACAAGAACCTGCCACCTGAGGAACAGATGA	CDS
IP_084063.1	RP	GPN1	ATGAAGAGGATGAGGAAGCAGACAGCGATACTGATGACATTGACCACAGAGTTACAGAGGAAAGCCATGAAGAGCCAGCATTCCAGAATTTTATGCAAGAATCGATGGCACAATACTGGAAGAGAAACAATAAATAGGAGACTTTAG	CDS
IP_084079.1	RP	SUPT7L	ATGACCCACCCCTGCACCAACCCTCAGCCAACAAGCCGAAGCCCCCCACTATGCTGGACATCCCCTCAGAGCCATGTAGTCTCACCATCCATACGATTCAGTTGA	CDS
IP_084099.1	RP	BRE	ATGAAGACCCTGGAGAAGATGTGGCCCTCCTCTCTGTTAGTTTTGAGGACACTGAAGCCACCCAGGTGTACCCCAAGCTGTACTTGTCACCTCGAATTGAGCATGCACTTGGAGGCTCCTCAGCTCTTCATATCCCAGCTTTTCCAGGAGGAGGATGTCTCATTGATTACGTTCCTCAAGTATGCCACCTGCTCACCAACAAGGTGCAGTACGTGA	CDS
IP_084159.1	RP	PPP1CB	ATGAGTGTGCTAGCATCAATCGCATTTATGGATTCTATGATGAATGCAAACGAAGATTTAATATTAAATTGTGGAAGACCTTCACTGATTGTTTTAACTGTCTGCCTATAG	CDS
IP_084360.1	MS	SPAST	ATGGCGGCGGCGGCAGTGAGAGCTGTGAATGAATTCTCCGGGTGGACGAGGGAAGAAGAAAGGCTCCGGCGGCGCCAGCAACCCGGTGCCTCCCAGGCCTCCGCCCCCTTGCCTGGCCCCCGCCCCTCCCGCCGCCGGGCCGGCCCCTCCGCCCGAGTCGCCGCATAA	5'UTR
IP_084434.1	RP	TTC27	ATGATGGAGAAATCTGGAGGCTGTATGCCCACGTATATGGAAATGGGCAGAGTGAAAAGCCTGATGAAAATGAAAAGGCATTCCAGTGCCTCTCAAAGGCATACAAGTGTGACACCCAGTCCAATTGTTGGGAGAAAGATATTACATCATTTAAGGAAGTTGTTCAAAGAGCCTTAG	CDS
IP_084503.1	RP	CRIM1	ATGCTACTGTCTCAATGGACGGGAAATGTGTGCCCTGATCACCTGCCCGGTGCCTGCCTGTGGCAACCCCACCATTCACCCTGGACAGTGCTGCCCATCATGTGCAGATGA	CDS
IP_084558.1	RP	STRN	ATGAAGATGAAGATGATGATGTTGATGGAAGAGAGAAAAGCGTCATTGATACTTCAACAATTGTTAGGAAAAAAGCATTGCCTGACAGCGGTGAAGATCGAGATACAAAAGAAGCTCTAA	CDS
IP_084703.1	MS and RP	HNRNPLL	ATGAACCCGTGTACATTGCTGGTCAACAGGCTTTTTTCAACTATTCTACAAGCAAAAGGATCACTCGGCCAGGAAATACTGATGATCCATCAGGAGGCAACAAAGTTCTTCTGCTCTCAATTCAGAATCCGCTTTATCCAATTACAGTGGATGTTTTATATACTGTATGCAACCCTGTTGGCAAAGTGCAACGTATTGTTATATTCAAGAGAAATGGGATACAAGCAATGGTTGAGTTTGAATCAGTCCTTTGTGCCCAGAAAGCTAAAGCAGCACTCAATGGAGCTGATATATATGCTGGATGTTGCACACTAA	CDS
IP_084719.1	RP	SRSF7	ATGATAGATGCTATGAGTGTGGCGAAAAGGGACATTATGCTTATGATTGTCATCGTTACAGCCGGCGAAGAAGAAGCAGGTCACGGTCTAGATCACATTCTCGATCCAGAGGAAGGCGATACTCTCGCTCACGCAGCAGGAGCAGGGGACGAAGGTCAAGGTCAGCATCTCCTCGACGATCAAGATCTATCTCTCTTCGTAGATCAAGATCAGCTTCACTCAGAAGATCTAGGTCTGGTTCTATAA	CDS
IP_084735.1	RP	DHX57	ATGATTCTCATCTTAATGCTATTGAAGATGCATCTTTTTTATATGAACTTGAAATTCGATTTTCTAAAGACCACAAATATCCCTACCAAGCTCCGCTCGTGGCATTTTATTCCACCAATGAGAACCTACCTCTGGCTTGTCGTTTACATATTTCTGAGTTTCTTTATGACAAGGCCTTGA	CDS
IP_084874.1	RP	EML4	ATGATAGTATTTCTGCTGCAAGTACTTCTGATGTTCAAGATCGCCTGTCAGCTCTTGAGTCACGAGTTCAGCAACAAGAAGATGAAATCACTGTGCTAA	CDS
IP_084943.1	RP	THADA	ATGGAGTGTCACAAATCCATTATATTAAACAGATTGTGCCTCTGCTGGAGAAAGCAGATAAAAATGGCATGTGTGATCCCACTATTCAAAGTTGTTTGGATATCTTAG	CDS
IP_085026.1	RP	LRPPRC	ATGCATATGCTGAGAAGGGCGACATTGACCATGTTAAGCAGACTCTGGAGAAGGTGGAGAAGTCCGAGCTTCACCTTATGGACCGTGATTTACTGCAAATTATTTTTAGCTTCAGTAAAGCTGGGTATCCTCAGTATGTCTCAGAAATTTTGGAAAAAGTTACATGTGAAAGAAGATATATTCCAGATGCAATGA	CDS
IP_085028.1	RP	LRPPRC	ATGCTTTACTTAAAGTCTATCTTCAAAATGAATATAAATTCTCACCAACTGATTTCCTGGCAAAAATGGAGGAAGCAAACATTCAACCAAATCGAGTGA	CDS
IP_085058.1	MS	PREPL	ATGAAGATGTTTTATTCTACACCTTCCAGAGGAACCTTCGCTGTCATGACGTATATCGAGCCACTTTTGGTGATAACAAACGTAATGAACGCTTTTACACAGAAAAAGACCCAAGCTACTTTGTTTTCCTTTATCTTACAAAAGACAGTCGTTTCCTCACCATAA	CDS
IP_085096.1	MS	SIX2	ATGAAAGCGTGCTCAAGGCCAAGGCCGTGGTGGCCTTCCACCGCGGCAACTTCCGCGAGCTCTACAAGATCCTGGAGAGCCACCAGTTCTCGCCGCACAACCACGCCAAGCTGCAGCAGCTGTGGCTCAAGGCACACTACATCGAGGCGGAGAAGCTGCGCGGCCGACCCCTGGGCGCCGTGGGCAAATACCGCGTGCGCCGCAAATTCCCGCTGCCGCGCTCCATCTGGGACGGCGAGGAGACCAGCTACTGCTTCAAGGAAAAGAGTCGCAGCGTGCTGCGCGAGTGGTACGCGCACAACCCCTACCCTTCACCCCGCGAGAAGCGTGAGCTGGCGGAGGCCACGGGCCTCACCACCACACAGGTCAGCAACTGGTTCAAGAACCGGCGGCAGCGCG…	CDS
IP_085157.1	RP	RHOQ	ATGCCAACGACGCCTTCCCGGAGGAGTACGTGCCCACCGTCTTCGACCACTACGCAGTCAGCGTCACCGTGGGGGGCAAGCAGTACCTCCTAG	CDS
IP_085270.1	RP	MSH6	ATGAATGTGAAGACCCCAGCCAGGAGACTATTACGTTCCTCTATAAATTCATTAAGGGAGCTTGTCCTAAAAGCTATGGCTTTAATGCAGCAAGGCTTGCTAATCTCCCAGAGGAAGTTATTCAAAAGGGACATAGAAAAGCAAGAGAATTTGAGAAGATGA	CDS
IP_085292.1	RP	FOXN2	ATGATGTGCCATCCTTTGGACCAGCTTGCTACCAGAACCCAGAAAAAAAATCAGCGACTTCAAAGCCCCCATACTCCTTTAGTCTTCTCATTTATATGGCCATTGAGCACTCTCCAAATAAATGTTTGCCTGTCAAAGAAATTTATAGCTGGATTCTGGACCATTTTCCATATTTTGCTACTGCACCAACAGGCTGGAAGAATTCTGTTCGACATAATCTGTCCCTGA	CDS
IP_085456.1	RP	SPTBN1	ATGAGAGACACAGGTTATTCCAGCTCAACCGGGAGGTGGACGACCTGGAGCAGTGGATCGCTGAGAGGGAGGTGGTCGCAGGGTCCCATGAACTGGGACAGGACTATGAGCATGTCACGATGTTACAAGAACGATTCCGGGAGTTTGCCCGAGACACCGGGAACATTGGGCAGGAGCGCGTGGACACGGTCAATCACCTGGCAGATGAGCTCATCAACTCTGGACATTCAGATGCCGCCACCATCGCTGAATGGAAGGATGGCCTCAATGAAGCCTGGGCCGACCTCCTGGAGCTCATTGACACAAGAACACAGATTCTTGCCGCTTCCTATGAACTGCACAAGTTTTACCACGATGCCAAGGAGATCTTTGGGCGTATACAGGACAAACACAAGAAAC…	CDS
IP_085459.1	RP	SPTBN1	ATGACAACATTGAGATCCAGCAGCAGTACAGTGATGTCAACAACCGCTGGGATGTCGACGACTGGGACAATGAGAACAGCTCTGCGCGGCTTTTTGAGCGGTCCCGCATCAAGGCTCTGGCAGATGAGCGTGAAGCCGTGCAGAAGAAGACCTTCACCAAGTGGGTCAATTCCCACCTTGCCCGTGTGTCCTGCCGGATCACAGACCTGTACACTGACCTTCGAGATGGACGGATGCTCATCAAGCTGCTGGAGGTCCTCTCTGGAGAGAGGCTGCCTAAACCCACCAAGGGACGAATGCGCATCCACTGCTTAG	CDS
IP_085469.1	RP	SPTBN1	ATGCCCAGTACATGTTTCTGCGGCAGCGGCTGCAGGCCCTGGACACTGGATGGAACGAGCTCCACAAGATGTGGGAGAACAGACAAAATCTCCTATCCCAGTCACATGCCTACCAGCAGTTCCTCAGAGACACGAAGCAAGCCGAAGCCTTTCTTAACAACCAGGAGTATGTTCTGGCTCACACTGAAATGCCTACCACCTTGGAAGGAGCTGAAGCAGCAATTAAAAAGCAAGAGGACTTCATGA	CDS
IP_085518.1	RP	RTN4	ATGAAGGCCACCCATTCAGGGCATATCTGGAATCTGAAGTTGCTATATCTGAGGAGTTGGTTCAGAAGTACAGTAATTCTGCTCTTGGTCATGTGA	CDS
IP_085544.1	RP	RPS27A	ATGAGAATGGCAAAATTAGTCGCCTTCGTCGAGAGTGCCCTTCTGATGAATGTGGTGCTGGGGTGTTTATGGCAAGTCACTTTGACAGACATTATTGTGGCAAATGTTGTCTGA	CDS
IP_085554.1	RP	CCDC88A	ATGCACTTCGAGAGAAAGCAGTCAGAGTCGATAAGCTTGAAAGTGAAGTCAGCAGATATAAAGAGAGACTACATGATATTGAATTTTATAAGGCAAGAGTTGAGGAATTAA	CDS
IP_085588.1	RP	SMEK2	ATGCAAAAGCCTTGGAAGAGGATGAAGAAATGTGGTTTAATGAAGATGAAGAAGAGGAAGGAAAAGCAGTTGTGGCACCAGTGGAAAAACCTAAGCCAGAAGATGATTTTCCAGATAATTATGAAAAGTTTATGGAGACTAAAAAAGCAAAAGAAAGTGAAGACAAGGAAAACCTTCCCAAAAGGACATCTCCTGGTGGCTTCAAATTTACTTTCTCCCACTCTGCCAGTGCTGCTAATGGAACAAACAGTAAATCTGTAG	CDS
IP_085589.1	RP	SMEK2	ATGAGGCTACAGATGATGATAAACGGCGTGAATTGGTTAATTTTTTCAAGGAGTTTTGTGCATTTTCTCAGACATTACAACCTCAAAACAGGGATGCATTTTTCAAAACATTGGCAAAATTGGGAATTCTTCCTGCTCTTGAAATTGTAA	CDS
IP_085715.1	RP	PEX13	ATGAACAGGAAGCTGCCTTTGAATCTGTTTTTGTTGAAACTAATAAGGTTCCAGTTGCACCTGATTCCATTGGGAAAGATGGAGAAAAGCAAGATCTTTGATATCTTTCATGTTTGCCTGCAGTTGAACAATACTTTAGAGTACTTTTTAAAATTATTTCTCACAAAGAAATGA	CDS
IP_085716.1	RP	PEX13	ATGAAGACCTCTGGGCAGAGAGTGAAGGAACTGTGGCATGCCTTGGTGCTGAGGACCGAGCAGCTACCTCAGCAAAATCTTGGCCAATATTCTTGTTCTTTGCTGTTATCCTTGGTGGTCCTTACCTCATTTGGAAACTATTGTCTACTCACAGTGATGAAGTAA	CDS
IP_085772.1	RP	USP34	ATGATGAAAAAGCACTTCATGAGCTTGGTTTTAAGGATATGCAGATGGTATTTGTATCTTTGGGTGCACCAAGGAGAGAGCGGAAAGGGGAAGGTGTTCAGCTGCCAGCATCTTGCCTCCCACCCCCTCAGAAGGACAACATTCCAATGCTTTTGCTTTTACAAGAGCCTCATTTAA	CDS
IP_085774.1	RP	USP34	ATGAGACCAGAGACTCCTCAATTATTGATCCAGGAACTGAGCAAGATCTTCCTTCCCCTGAAAATAGTTCTGTTAAAGAATACCGAATGGAAGTTCCATCTTCGTTTTCAGAAGACATGTCAAATATCAGGTCACAGCATGCAGAAGAACAGTCCAACAATGGTAGATATGACGATTGTAAAGAATTTAAAGACCTCCACTGTTCCAAGGATTCTACCCTAG	CDS
IP_085783.1	RP	USP34	ATGGACTGCAGCTCAGAAAGGAACATACTCTCAAAATATTTACTTATATCAATTCCTGGACACAGAGGCAATGTCTATGCTGCTTCAAGGAATATAAGCATTTGGAGATTTTTAATCAAGTAG	CDS
IP_085791.1	RP	XPO1	ATGATCCACAGATGGTCGCTGAAAATTTTGTTCCCCCTCTGTTGGATGCAGTTCTCATTGATTATCAGAGAAATGTCCCAGCTGCTAGAGAACCAGAAGTGCTTAGTACTATGGCCATAA	CDS
IP_085823.1	RP	CCT4	ATGCCCAGGGAGAAAAAACTGCAGGCATTAATGTCCGAAAGGGTGGTATTTCCAACATTTTGGAGGAACTGGTTGTCCAGCCTCTGTTGGTATCAGTCAGTGCTCTGA	CDS
IP_085831.1	RP	B3GNT2	ATGAGAAATGAGTGTTGGACGTCGAAGAATAAAGTTGTTGGGTATCCTGATGATGGCAAATGTCTTCATTTATTTTATTATGGAAGTCTCCAAAAGCAGTAG	5'UTR
IP_085887.1	MS	UGP2	ATGAATTTGAGCACACCAAAAAAGACCTGGATGGATTTCGGAAGCTATTTCATAGATTTTTGCAAGAAAAGGGGCCTTCTGTGGATTGGGGAAAAATCCAGAGACCCCCTGAAGATTCGATTCAACCCTATGAAAAGATAA	CDS
IP_085935.1	MS and RP	AFTPH	ATGCTTTTGAGGATGAACAAAAAGATAGTTGTTCTTGGGCTGCTTTTGGAGACCAGCAGGCTACTGAATCTCATCATCGAAAGGAAGCCTGGCAGTCACATAGGACAGATGAAAATATTGATACTCCAGGAACCCCCAAAACGCACAGTGTACCTTCAGCAACTTCCAAAGGAGCAGTTGCTAGTGGCCATTTACAGGAATCAGCCACTTCAGTTCAGACAGCTTTATTAA	CDS
IP_085943.1	RP	SERTAD2	ATGAGCATGAAGATGGGCTGGAAGGCAAAATCGTGTCTCCCTGTGACGGTCCATCCAAGGTGTCTTACACCTTACAGCGCCAGACTATCTTCAACATTTCCCTTATGA	CDS
IP_085987.1	RP	RAB1A	ATGTTAAAATTCAGAGCACTCCAGTCAAGCAGTCAGGTGGAGGTTGCTGCTAAAATTTGCCTCCATCCTTTTCTCACAGCAATGAATTTGCAATCTGAACCCAAGTGA	CDS
IP_085998.1	RP	ACTR2	ATGCAGGCTCTAACTTTCCAGAACACATCTTCCCAGCTTTGGTTGGAAGACCTATTATCAGATCAACCACCAAAGTGGGAAACATTGAAATCAAGGATCTTATGGTTGGTGATGAGGCAAGTGAATTACGATCAATGTTAG	CDS
IP_086143.1	MS	ANTXR1	ATGCCCGCAACGTGGACAGGGTCCTCTGCAGCTTCAAGATCAATGACTCGGTCACACTCAATGAGAAGCCCTTTTCTGTGGAAGATACTTATTTACTGTGTCCAGCGCCTATCTTAA	CDS
IP_086170.1	RP	GFPT1	ATGGACGTCTTTCTATCCATCGAATTAAACGAACTGCAGGAGATCACCCCGGACGAGCTGTGCAAACACTCCAGATGGAACTCCAGCAGATCATGA	CDS
IP_086177.1	RP	GFPT1	ATGACTTCGAATCTGAAACAGACACAGAGACAATTGCCAAGCTCGTTAAGTATATGTATGACAATCGGGAAAGTCAAGATACCAGCTTTACTACCTTGGTGGAGAGAGTTATCCAACAATTGGAAGGTGCTTTTGCACTTGTGTTTAAAAGTGTTCATTTTCCCGGGCAAGCAGTTGGCACAAGGCGAGGTAGCCCTCTGTTGA	CDS
IP_086247.1	RP	ANXA4	ATGGACGGAGCCTTGAAGATGACATTCGCTCTGACACATCGTTCATGTTCCAGCGAGTGCTGGTGTCTCTGTCAGCTGGTGGGAGGGATGAAGGAAATTATCTGGACGATGCTCTCGTGA	5'UTR
IP_086296.1	RP	TIA1	ATGGCTTTGTCTCCTTTTTCAACAAATGGGATGCTGAAAACGCCATTCAACAGATGGGTGGCCAGTGGCTTGGTGGAAGACAAATCAGAACTAACTGGGCAACCCGAAAGCCTCCCGCTCCAAAGAGTACATATGAGTCAAATACCAAACAGCTATCATATGATGAGGTTGTAA	CDS
IP_086476.1	RP	ZNF638	ATGAAAGTGAGGTGCAAACAGCAACTGATAGTCCCTCTGTTAAACCTAATGAGCTTGAAGAAGAAAGTACTCCCAGCATTCAAACAGAAACTTTGGTACAGCAGGAAGAGCCTTGTGAGGAAGAAGCTGAAAAAGCAACATGTGATTCTGACTTTGCTGTTGAAACTTTGGAGCTTGAAACTCAAGGAGAGGAGGTCAAAGAAGAAATTCCTCTTGTAG	CDS
IP_086477.1	MS and RP	ZNF638	ATGGGACAGAATTTAATAAACAGAAGCATCTTGAAGCTGCTGATAAGGGACATTCACCAGCACAAAAGCCTAAAACTAGCAGTGGAACAAAACCATCAGTTAAACCTACAAGCGCTACAAAGAGTGATTCAAATCTAG	CDS
IP_086643.1	RP	CCT7	ATGATTCAGTGGTGGCTGGTGGCGGGGCCATTGAGATGGAACTCTCCAAGTACCTGCGGGATTACTCAAGGACTATTCCAGGAAAACAGCAGCTGTTGA	CDS
IP_086644.1	RP	CCT7	ATGCCAAGGCCTTGGAGATTATCCCACGCCAGCTGTGTGACAATGCTGGCTTTGATGCCACAAACATTCTCAACAAGCTGCGGGCTCGGCATGCCCAGGGGGGTACATGGTATGGAGTAG	CDS
IP_086645.1	RP	CCT7	ATGCTCTGTCAGCAGATGTGCTGGGTCGATGCCAGGTGTTTGAAGAGACCCAGATTGGAGGCGAGAGGTACAATTTTTTTACTGGCTGCCCCAAGGCCAAGACATGCACCTTCATTCTCCGTGGCGGCGCCGAGCAGTTTATGGAGGAGACAGAGCGGTCCCTGCATGATGCCATCATGA	CDS
IP_086744.1	RP	DGUOK	ATGGTTCCCTCAGTGACATCGAGTGGCATATCTATCAGGACTGGCATTCTTTTCTCCTGTGGGAGTTTGCCAGCCGGATCACATTACATGGCTTCATCTACCTCCAGGCTTCTCCCCAGGTTTGTTTGA	CDS
IP_086782.1	RP	MOB1A	ATGGAACTATTACAGAATTCTGCACTGAAGCAAGCTGTCCAGTCATGTCTGCAGGTCCGAGATATGAATATCACTGGGCAGATGGTACTAATATTAAAAAGCCAATCAAATGTTCTGCACCAAAATACATTGACTATTTGA	CDS
IP_086810.1	RP	DCTN1	ATGCAGATGAGCGCATCGAGAAAGTCCAGACTCGGCTGGAGGAGACCCAGGCACTGCTGCGAAAGAAGGAGAAAGAGTTTGAGGAGACAATGGATGCACTCCAGGCTGACATCGACCAGCTGGAGGCAGAGAAGGCAGAACTAA	CDS
IP_086814.1	MS and RP	DCTN1	ATGAAGCAAAGGGCAAAAATGATGGAACTGTTCAAGGCAGGAAGTACTTCACTTGTGATGAAGGGCATGGCATCTTTGTGCGCCAGTCCCAGATCCAGGTATTTGAAGATGGAGCAGATACTACTTCCCCAGAGACACCTGATTCTTCTGCTTCAAAAGTCCTCAAAAGAGAGGGAACTGATACAACTGCAAAGACTAGCAAACTGCCCACGCGCCCAGCCAGTACTGGGGTGGCTGGGGCCAGTAGCTCCCTGGGCCCCTCTGGCTCAGCGTCAGCAGGTGAGCTGA	CDS
IP_086830.1	MS	WDR54	ATGGACCAAGCGCCCAGCTTCTCAGCGCTGCTCCTGAGGGTGTGCCCTTGGCCCAGCGCCAGCTCCACGCTAAGGAGGGTGCTGGAGTGA	CDS
IP_086831.1	RP	WDR54	ATGGGAACGGACAAGTGCATCTATATGAGGCCACTACAGGAAATCTACATGTCCAGATCAATGCCCATGCCCGGGCCATCTGCGCCCTGGACCTGGCTTCTGAGGTGGGCAAGCTACTCTCTGCAGGTGAGGACACCTTTGTGCATATCTGGAAGCTGA	CDS
IP_086935.1	MS	LOXL3	ATGACTGGGGGACCCTGGAGGCCATGGTGGCCTGTAGGCAACTGGGTCTGGGCTACGCCAACCACGGCCTGCAGGAGACCTGGTACTGGGACTCTGGGAATATAA	CDS
IP_086947.1	RP	DOK1	ATGGCCGGGACAAGGTCATGTTCTCTTTCGAGGCCGGCCGCCGCTGCCCCTCAGGCCCTGGAACCTTCACCTTCCAGACGGCACAGGGAAATGACATCTTCCAGGCAGTTGAGACTGCCATCCACCGGCAGAAGGCCCAGGGAAAGGCCGGACAGGGGCACGATGTTCTCAGAGCTGACTCCCATGAAGGGGAGGTGGCAGAGGGGAAGTTGCCTTCCCCACCTGGCCCCCAAGAGCTCCTCGACAGTCCCCCAGCCCTGTATGCTGAGCCCTTAG	CDS
IP_087019.1	RP	HK2	ATGGGCTCCAGAAGGTGGAGATGGAGAATCAGATCTATGCCATCCCTGAGGACATCATGCGAGGCAGTGGCACCCAGCTGTTTGACCACATTGCCGAATGCCTGGCTAACTTCATGGATAAGCTACAAATCAAAGACAAGAAGCTCCCACTGGGTTTTACCTTCTCGTTCCCCTGCCACCAGACTAAACTAG	CDS
IP_087164.1	RP	SUCLG1	ATGGAATTCGGCATTGTTCCTACACAGCTTCTCGGCAACATCTCTATGTTGATAAAAATACAAAGATTATTTGCCAGGGTTTCACTGGCAAACAGGGCACCTTTCACAGCCAGCAGGCATTGGAATATGGCACCAAACTCGTTGGAGGAACCACTCCAGGGAAAGGAGGCCAGACACATCTGGGCTTACCTGTCTTTAATACTGTGA	CDS
IP_087197.1	RP	TMSB10	ATGGACACGAGCCACAAGCTGCACTGTGAACCTGGGCACTCCGCGCCGATGCCACCGGCCTGTGGGTCTCTGAAGGGACCCCCCCCCAATCGGACTGCCAAATTCTCCGGTTTGCCCCGGGATATTATAGAAAATTATTTGTATGAATAA	3'UTR
IP_087279.1	RP	CAPG	ATGAGCAGGGGGCCTGTGCCGTGCTGGCTGTGCACCTCAACACGCTGCTGGGAGAGCGGCCTGTGCAGCACCGCGAGGTGCAGGGCAATGAGTCTGACCTCTTCATGA	CDS
IP_087302.1	RP	MAT2A	ATGGCCACTTTGGTAGGGACAGCTTCCCATGGGAAGTGCCCAAAAAGCTTAAATATTGAAAGTGTTAGCCTTTTTTCCCCAGACTTGTTGGCGTAG	CDS
IP_087303.1	RP	MAT2A	ATGGCGGTTGGGGTGCTCATGGAGGAGGTGCCTTTTCAGGAAAGGATTATACCAAGGTCGACCGTTCAGCTGCTTATGCTGCTCGTTGGGTGGCAAAATCCCTTGTTAAAGGAGGTCTGTGCCGGAGGGTTCTTGTTCAGGTCTCTTATGCTATTGGAGTTTCTCATCCATTATCTATCTCCATTTTCCATTATGGTACCTCTCAGAAGAGTGAGAGAGAGCTATTAG	CDS
IP_087324.1	RP	VAMP8	ATGTGGAGCGGATCCTGGCCCGGGGGGAAAACTTGGAACATCTCCGCAACAAGACAGAGGATCTGGAAGCCACATCTGAGCACTTCAAGACGACATCGCAGAAGGTGGCTCGAAAATTCTGGTGGAAGAACGTGA	CDS
IP_087346.1	RP	USP39	ATGTGTCTCCCCATGAGATGCTTCAGGCAGTTGTACTTTGCAGTAAGAAGACTTTTCAGATCACCAAACAAGGAGATGGCGTTGACTTTCTGTCTTGGTTTCTGA	CDS
IP_087354.1	RP	USP39	ATGAGGACTCGGAGCCTGAGCGGGAGGTGCGAGCAAAGAATGGCCGAGTGGATTCTGAGGACCGGAGGAGCCGCCACTGCCCGTACCTGGACACCATTAACAGGAGTGTGCTGGACTTTGACTTTGAGAAACTGTGTTCTATCTCCCTCTCACACATCAATGCTTATGCCTGTCTGGTGTGTGGCAAGTACTTTCAAGGCCGGGGTTTGA	CDS
IP_087456.1	RP	PTCD3	ATGTGTTTCAAGATGATCCTTACCTTATGCCAGCATCATCTTTGGAATCTCGTTCATTTTTACTGGCAAAGAAATCCGGGGAGAATGTGGCCAAGTTTATTATTAATTCATACCCCAAATATTTTCAGAAGGACATAG	CDS
IP_087509.1	MS	KDM3A	ATGGAACCCTGGTTTCCAAACAAGCAAAATCTTGCTCTGAGGCCTCTCCCAGTATGTGTCCTGTGCAGTCTGTACCTACAACAGTTTTTAAGGAGATACTGCTTGGCTGTACTGCGGCAACTCCACCTAGTAAGGACCCAAGACAGCAAAGTACTCCCCAGGCTGCCAACTCTCCACCTAACCTTGGAGCAAAAATTCCTCAAGGATGTCATAAACAAAGTTTACCAGAGGAAATTTCTTCCTGTCTAA	CDS
IP_087510.1	RP	KDM3A	ATGGAGTTCAAGGCTGGGCTATTGTACAGTTTCTTGGGGATGTGGTGTTTATCCCGGCAGGAGCTCCACATCAGGTTCATAACTTATATAGCTGCATCAAAGTGGCTGAAGATTTTGTTTCTCCAGAGCATGTTAAACACTGCTTCTGGCTTACTCAGGAATTCCGATATCTGTCACAGACTCATACCAATCACGAAGATAAATTACAGGTGA	CDS
IP_087516.1	RP	KDM3A	ATGGGGAATAAAGGCAAACTGCCCTTGTTCAAACAGGCAATTCAAACTCTTTTCAAAGCCAGCCTCAAAGGAAGACCTAAAACAGACTTCTTTAGCTGGAGAAAAACCGACTCTTGGTGCAGTGCTCCAGCAGAATCCCTCAGTGTTGGAGCCAGCAGCTGTGGGTGGGGAAGCAGCCTCCAAGCCAGCCGGCAGCATGAAGCCTGCCTGTCCAGCCAGCACATCTCCTCTAAACTGGCTGGCCGACCTAACCAGCGGGAATGTCAACAAGGAAAACAAGGAAAAACAACCAACAATGCCAATTTTAAAGAATGA	CDS
IP_087891.1	RP	CIAO1	ATGACTGGGTATGCTGTGCCACCCTTGAGGGCCATGAATCCACTGTGTGGAGCTTGGCCTTTGACCCGAGTGGCCAGCGCCTGGCGTCTTGTAGTGATGACCGTACTGTGCGTATCTGGCGTCAGTATCTACCAGGCAATGAACAAGGGGTGGCATGCAGCGGCTCTGACCCCAGTTGGAAATGTATCTGTACTTTGTCCGGCTTCCACTCAAGGACCATTTATGACATTGCTTGGTGTCAGCTGA	CDS
IP_087893.1	MS	CIAO1	ATGAAAATGAGGTCAAGTCAGTGGCTTGGGCCCCATCTGGCAACCTCCTGGCCACTTGCAGCCGAGATAAGAGCGTTTGGGTCTGGGAAGTTGATGAAGAGGATGAGTATGAATGTGTCAGTGTTCTCAACTCCCACACACAGGATGTCAAGCATGTGGTTTGGCACCCAAGTCAGGAGCTCTTAG	CDS
IP_087902.1	RP	SNRNP200	ATGTGCAGTTTGAGTCTGATGAGGAGGAAGGTGATGAAGACGTATACGGGGAGGTTCGAGAAGAGGCATCTGATGATGACATGGAAGGGGACGAGGCTGTCGTGCGCTGCACCCTCTCGGCTAATCTCGTAG	CDS
IP_087903.1	RP	SNRNP200	ATGAACCCACAGGAGAGGTGCTGTCCCTTGTTGGGAAGCTGGAGGGCACCCGTATGGGAGACAAGGCTCAACGGACCAAACCGCAGATGCAGGAGGAAAGAAGAGCCAAGCGAAGAAAGCGTGATGAGGACCGGCATGACATCAACAAGATGA	CDS
IP_087911.1	RP	SNRNP200	ATGCATTTTGGCTGCAGCGGCAGCTCAGTCGTTTCTATGATGATGCCATCGTGTCGCAGAAGAAGGCAGATGAAGTATTGGAGATTTTGA	CDS
IP_087913.1	RP	SNRNP200	ATGAAATCGTCTATGAAAAAATCATGGAACATGCTGGAAAAAATCAGGTGCTGGTGTTTGTCCACTCCCGGAAGGAGACTGGAAAGACAGCCAGGGCCATCCGGGACATGTGCCTAG	CDS
IP_087933.1	RP	NCAPH	ATGACGATGAGAAGGAGCGGCTGCAGCGGAGGCGCTCGAGGGTCTTTGATCTGCAGTTCAGCACTGACTCACCTCGCTTATTGGCCTCCCCCTCCAGCAGGAGTATTGACATTTCAGCTACTATCCCCAAGTTTACAAACACGCAGATTACGGAACATTACTCCACCTGTATCAAACTGTCCACTGAAAATAAAATCACTACCAAGAATGCTTTTGGTTTGCACTTGA	CDS
IP_087960.1	RP	ARID5A	ATGCTGCTGACCCAGCACCACTTCCCAGCCAGGAGCCCCCCAGGAACAGCACAGAACAGCAGGGCCTGGCCTCTGGGTCTTCTGTGTCCTTTGTGGGTGCCAGCGGCTGTCCTGAGGCCTACAAGCGGCTCCTATCCAGCTTCTACTGCAAGGGGACACACGGCATCATGTCACCACTGGCCAAAAAGAAGCTCCTGGCCCAGGTGA	CDS
IP_088377.1	RP	EIF5B	ATGTACAAGATGGTGAAGCAGGTGGTATCACACAACAAATTGGGGCCACCAATGTTCCTCTTGAAGCTATTAATGAACAGACTAAGATGA	CDS
IP_088525.1	MS	TBC1D8	ATGAGGTCTTTGACCTCGACCCCGATCTGCAGGAGCCGAGCCAGATCACCAAGAGGGACCTGGAAGCCAGAGCACAGAATGAGTTCTTCCGGGCTTTCTTCAGGTTGCCGAGGAAGGAGAAGCTGCACGCGGTTGTGGACTGTTCGCTCTGGACGCCGTTCAGTCGCTGTCACACCACGGGGCGGATGTTCGCCTCTGACAGCTACATCTGCTTTGCCAGCAGAGAAGATGGCTGCTGTAAGATCATCCTGCCACTCAGAGAGGTGGTGA	CDS
IP_088935.1	RP	RANBP2	ATGAAGAAATTTTGTTTAAAGAGAGAGCCAAACTTTATAGATGGGATCGGGATGTCAGTCAGTGGAAGGAGCGCGGTGTTGGAGATATAA	CDS
IP_088941.1	RP	RANBP2	ATGACTCTTCTGGAAGTCAGGTGGGAACAGGATTTAAAAGTAATTTCTCAGAAAAAGCTTCTAAGTTTGGCAATACAGAGCAAGGATTCAAATTTGGGCATGTGGATCAAGAAAATTCACCTTCATTTATGTTTCAGGGTTCTTCTAATACAGAATTTAAGTCAACCAAAGAAGGATTTTCCATCCCTGTGTCTGCTGATGGATTTAAATTTGGCATTTCGGAACCAGGAAATCAAGAAAAGAAAAGTGAAAAGCCTCTTGAAAATGGTACTGGCTTCCAGGCTCAGGATATTAGTGGCCAGAAGAATGGCCGTGGTGTGA	CDS
IP_089438.1	RP	ACTR3	ATGATACAGATGGGTCAAAATGGATTAAACAGTATACTGGAATCAATGCTATCTCAAAGAAAGAGTTTTCTATCGATGTTGGTTATGAGAGATTTTTGGGACCTGAAATCTTTTTTCATCCAGAGTTTGCTAATCCAGACTTTACACAACCTATCTCAGAAGTTGTAG	CDS
IP_089439.1	RP	ACTR3	ATGTCAGACGTCCTCTCTACAAGAATATTGTCCTCTCTGGAGGTTCAACCATGTTCAGGGACTTTGGACGTCGCTTGCAAAGAGATTTGA	CDS
IP_089440.1	RP	ACTR3	ATGTACAAGTCATTACACACCACATGCAGCGATATGCAGTTTGGTTTGGAGGATCAATGCTGGCTTCCACGCCTGAGTTCTACCAAGTATGCCACACCAAAAAGGATTATGAAGAAATTGGACCTAGCATTTGTCGTCACAATCCAGTGTTTGGAGTCATGTCGTAAAATTGGCTTCATAGTTATTGGGGTTAGGGAGGTGGGGAAGAGATAA	CDS
IP_089481.1	MS	CCDC93	ATGAAGAATCTCGAATCCATGCTACACTTTTGGAATATGGCAGGAGATATGGATTTAGCCGCCAGAGCAAAATGGAGAAGGCTGAGGACAAGAAAACGGCACTTCCAGCAGGGCTGTCAGCTACAGAAAAAGCTGATGCCCACGAGGAAGATGAGCTTCGAGCAGCTGAAGAGCAGCGTATTCAGTCGCTGA	CDS
IP_089647.1	MS	EPB41L5	ATGATGATCAGGGCAAAGAACAGGAACATACATTTGTCTTTAGACTGGATCATCCAAAAGCATGCAAACATTTATGGAAATGTGCTGTGGAGCATCATGCTTTCTTCCGCCTTCGAGGCCCCGTCCAAAAGAGTTCTCATCGATCAGGATTTATTCGACTAG	CDS
IP_089792.1	RP	CLASP1	ATGAGCCGTATGGGATGTATTCTGACGATGATGCCAACAGTGATGCCTCAAGTGTTTGCTCTGAGCGCTCATATGGCTCCAGGAATGGTGGCATTCCCCATTATCTGCGGCAGACTGAGGATGTAG	CDS
IP_089880.1	RP	BIN1	ATGGCACCGTGGAGGGCGGCAGTGGGGCCGGGCGCTTGGACCTGCCCCCAGGTTTCATGTTCAAGGTACAGGCCCAGCACGACTACACGGCCACTGACACAGACGAGCTGCAGCTCAAGGCTGGTGATGTGGTGCTGGTGA	CDS
IP_089931.1	RP	ERCC3	ATGAGGATGAAGAGGATGATGAAGAGGACGCCCCGGGGAACGACCCTCAGGAAGCGGTTCCCTCGGCGGCGGGGAAGCAGGTGGATGAGTCAGGCACCAAAGTGGATGAATATGGAGCCAAGGACTACAGGCTGCAAATGCCGCTGA	CDS
IP_089983.1	RP	IWS1	ATGAAGAGAAAGCATCAGCAAAGAAGAGTCGTGTTGTCTCTGATGCAGATGACTCTGACAGTGATGCTGTATCAGACAAGTCAGGCAAAAGAGAGAAGACCATAG	CDS
IP_089985.1	RP	IWS1	ATGAAGAGAAGGATCTGTTTGGGAGTGACAGTGAGTCAGGCAATGAAGAAGAAAATCTTATTGCAGACATATTTGGAGAATCTGGTGATGAAGAGGAAGAAGAATTTACAGGTTTTAACCAAGAAGATCTGGAAGAAGAAAAAGGTGAAACACAGGTAA	CDS
IP_090148.1	RP	UGGT1	ATGGTGCTCCTTATGGTTACACTCCTTTCTGTGACAGCCGAAGAGAAATGGACGGCTACAGGTTCTGGAAGTCAGGGTACTGGGCCAGTCATTTAG	CDS
IP_090235.1	RP	IMP4	ATGAAGTGGGGGCACTGGTGCGAGCCTGCAAAGCCAACGGCGTCACCGATCTGCTGGTCGTTCACGAGCATCGGGGCACACCTGTGGGGCTCATCGTCAGCCACCTGCCCTTTGGTCCTACTGCCTACTTCACGCTGTGCAATGTGGTCATGCGGCATGACATCCCAGACCTGGGCACCATGTCGGAGGCCAAGCCCCACCTCATCACACACGGCTTCTCCTCCCGCCTGGGCAAGCGGGTCTCTGACATCCTCCGATACCTATTTCCCGTGCCCAAAGATGACAGCCACCGGGTCATCACCTTCGCAAACCAGGACGACTACATATCATTCCGGCACCATGTGTATAAGAAGACAGACCACCGCAACGTGGAGCTCACTGAGGTCGGGCCCCGCTTTG…	CDS
IP_090597.1	RP	R3HDM1	ATGCCAGTAGTACCCAGCAGAGGCGCCAGATATTTAGAGTTAATAAAGATGCTTCAGGGAGATCTACAAATAGCCATCAAAGCAGCACTGAGAATGAGTTGA	CDS
IP_090656.1	RP	MCM6	ATGGATATGAGACAGAAGGCATTCGAGGACTCCGGGCCCTTGGTGTTAGGGACCTTTCTTATAGGCTGGTCTTTCTTGCCTGCTGTGTTGCGCCAACCAACCCAAGGTTTGGGGGGAAAGAGCTCAGAGATGAGGAACAGACAGCTGAGAGCATTAAGAACCAAATGA	CDS
IP_090660.1	RP	MCM6	ATGGTGTGTGTTGTATTGATGAATTTGATAAGATGGACGTGCGGGATCAAGTTGCTATTCATGAAGCTATGGAACAGCAGACCATATCCATCACTAAAGCAGGAGTGA	CDS
IP_090663.1	RP	DARS	ATGTTTTTACTGTGTCATATTTTAAAAATAATGCATACCTGGCTCAGTCCCCACAGCTATATAAGCAAATGTGCATTTGTGCTGATTTTGAGAAGGTTTTCTCTATTGGACCAGTATTCAGAGCGGAAGACTCTAATACCCATAGACATCTAA	CDS
IP_090821.1	RP	ZEB2	ATGAGGAAGACAAGCTTCATATTGCTGAGGATGACGGTATTGCCAACCCTCTGGACCAGGAGACGAGTCCAGCTAGTGTGCCCAACCATGAGTCCTCCCCACACGTGA	CDS
IP_090829.1	MS and RP	ZEB2	ATGCTTTTTCTTCTCACCATTTCTGGCCAAAACTACAAACAAGACTTCGCAGATCGAGCCTGCGTGCTGCCGAAGCAGGGCGCCGAGTCCATGCGAACTGCCATCTGA	5'UTR
IP_090839.1	MS	ACVR2A	ATGAATACATGTTGCCATTTGAGGAGGAAATTGGCCAGCATCCATCTCTTGAAGACATGCAGGAAGTTGTTGTGCATAAAAAAAAGAGGCCTGTTTTAA	CDS
IP_090946.1	RP	MMADHC	ATGAGTCTCATGTGGCTGCTGCACCTCCAGATATATGCTCTCGAACAGTGTGGCCTGATGAAACTATGGGACCCTTTGGACCTCAAGATCAGAGGTTCCAGCTTCCTGGGAACATAG	CDS
IP_090947.1	RP	MMADHC	ATGGTGCTAAGGAAATTTGCTATGCTCTTCGAGCTGAGGGTTATTGGGCTGACTTTATTGACCCATCATCTGGTTTGGCATTTTTTGGACCATATACAAACAACACTCTTTTTGAAACTGATGAACGCTACCGACATTTAG	CDS
IP_090952.1	RP	RND3	ATGCAAGATAGTTGTGGTGGGAGACAGTCAGTGTGGAAAAACTGCGCTGCTCCATGTCTTCGCCAAGGACTGCTTCCCCGAGAATTACGTTCCTACAGTGTTTGA	CDS
IP_090972.1	RP	RIF1	ATGAAATCTCATCACCTGTTAATAAGGTTCGCCGTGTCTCCTTTGCAGATCCAATATACCAAGCAGGATTGGCAGATGACATTGATAGACGGTGCTCTATTGTTAGGTCCCATTCTTCCAATAGTTCTCCCATAG	CDS
IP_091004.1	MS	NEB	ATGCTACTGATATTGCCAGTCAGATTAAGTATAAGCAATCAGCAGAAATGGAGAAAGCCAATTTCACTTCTGTGGTTGATACTCCAGAGATCATTCATGCCCAACAAGTCAAGAATCTTTCAAGCCAGAAAAAGTACAAGGAAGATGCTGAGAAGTCCATGTCGTATTATGAGACTGTTTTGGACACCCCAGAGATACAGAGAGTCCGGGAGAACCAAAAGAACTTCAGCCTTCTCCAATACCAGTGTGACCTTAAAAACAGTAAAGGAAAAATTACAGTTGTTCAAGACACGCCAGAAATACTGCGTGTAA	CDS
IP_091106.1	MS and RP	CACNB4	ATGGCAGCACCACTTCGACCAGCTTCATCCTCAGACAGGGTTCAGCGGATTCCTACACAAGCAGGCCGTCTGACTCCGATGTCTCTTTGGAAGAGGACCGGGAAGCAATTCGACAGGAGAGAGAACAGCAAGCAGCTATCCAGCTTGAGAGAGCAAAGTCCAAACCTGTAG	CDS
IP_091171.1	RP	PRPF40A	ATGGAAGGACTTACTACTACAACACTGAAACCAAACAGTCTACCTGGGAGAAACCAGATGATCTTAAAACACCTGCTGAGCAACTCTTATCTAAATGCCCCTGGAAGGAATACAAATCAGATTCTGGAAAGCCTTACTATTATAATTCTCAAACAAAAGAATCTCGCTGGGCCAAACCTAAAGAACTTGAGGATCTTGAAGGATACCAGAATACCATTGTTGCTGGAAGTCTTATTACAAAATCAAACCTGCATGCAATGA	CDS
IP_091172.1	MS	PRPF40A	ATGTGCTTGAGCATGAATGTCAGCATCATCATTCAAAGAACAAGAAACATTCTAAGAAATCTAAAAAACATCATAGGAAACGTTCCCGCTCTCGATCGGGGTCAGATTCAGATGATGATGATAGCCATTCAAAGAAAAAAAGACAGCGATCAGAGTCTCGTTCTGCTTCAGAACATTCTTCTAGTGCAGAGTCTGAGAGAAGTTATAAAAAGTCAAAAAAGCATAAGAAGAAAAGTAAGAAGAGGAGACATAAATCTGACTCTCCAGAATCCGATGCTGAGCGAGAGAAGGATAAAAAAGAAAAAGATCGGGAAAGTGAAAAAGACAGAACTAGACAAAGATCAGAATCAAAACACAAATCGCCTAAGAAAAAGACTGGAAAGGATTCTGGTAATTGGG…	CDS
IP_091377.1	MS	BAZ2B	ATGAAGAAGAAGAAGATCAAAGTATTGAAGAAAGTGAAGATGATGATTCTGATTCAGAGAGTGAAGCACAACATAAAAGTAACAACCAGGTGCTATTACATGGTATTTCAGACCCAAAAGCAGATGGACAGAAAGCAACTGAAAAAGCCCAGGAAAAAAGAATACACCAGCCATTACCTCTTGCGTCTGAATCCCAGACTCACTCATTCCAATCCCAGCAGAAGCAGCCTCAGGTTTTGTCACAGCAGCTTCCATTTATTTTCCAAAGCTCTCAGGCAAAGGAGGAATCTGTGA	CDS
IP_091406.1	RP	MARCH7	ATGTACCATCAGCTTCTGAAGTTCCCGATAATAGGGCATCTGAAGCTTCTCAGGGATTTCGATTTCTTAGGCGAAGATGGGGTTTGTCATCTCTTAGCCACAATCATAGCTCTGAGTCAGATTCAGAAAATTTTAACCAAGAATCTGAAGGTAGAAATACAGGACCATGGTTATCTTCCTCACTTAGAAATAGATGCACACCTTTGTTCTCTAGAAGGAGGCGAGAGGGAAGAGATGAATCTTCAAGGATACCTACCTCTGATACATCATCTAGATCTCATATTTTTAGAAGAGAATCAAATGAAGTGGTTCACCTTGAAGCACAGAATGATCCTCTTGGAGCTGCTGCCAACAGACCACAAGCATCTGCAGCATCAAGCAGTGCCACAACAGGTGGCT…	CDS
IP_091411.1	RP	LY75-CD302	ATGACGCAAGTTCTGATAAGATGTGTCCTCCAGATGAGGGCTGGAAGAGACATGGAGAAACCTGTTACAAGATTTATGAGGATGAGGTCCCTTTTGGAACAAACTGCAATCTGA	CDS
IP_091413.1	RP	LY75-CD302	ATGGACATGGCACAGCAATCTCAAATGCATCTGATGTCTGGAAGAAAGGAGGCTCAGAGGAAAGCCTTTGTGACCAGCCTTATCATGAGATCTATACCAGAGATGGGAACTCTTATGGGAGACCTTGTGAATTTCCATTCTTAA	CDS
IP_091414.1	RP	LY75-CD302	ATGGATTCTGGAAAACAGTTGATTGCAATGACAATCAACCAGGTGCTATTTGCTACTATTCAGGAAATGAGACTGAAAAAGAGGTCAAACCAGTTGACAGTGTTAAATGTCCATCTCCTGTTCTAA	CDS
IP_091497.1	RP	TANK	ATGAGGAAGACACCTCTTTTGAATCACTTTCTAAATTCAATGTCAAGTTTCCACCTATGGACAATGACTCAACTTTCTTACATAGCACTCCAGAGAGACCCGGCATCCTTAGTCCTGCCACGTCTGAGGCAGTGTGCCAAGAGAAATTTAATATGGAGTTCAGAGACAACCCAGGGAACTTTGTTAAAACAGAAGAAACTTTATTTGAAATTCAGGGAATTGACCCCATAG	CDS
IP_091759.1	RP	TTC21B	ATGGAGAGCAGCATGAGGCAACCAAAGTTTTACAAGATGCCATCCATGAATTTTCTGGAACATCTGAAGAAGTGCGGGTTACCATTGCTAATGCAGACCTTGCTCTAG	CDS
IP_091917.1	MS	ABCB11	ATGATGGTTTTGAGTCAGATAAATCATATAATAATGATAAGAAATCAAGGTTACAAGATGAGAAGAAAGGTGATGGCGTTAGAGTTGGCTTCTTTCAATTGTTTCGGTTTTCTTCATCAACTGACATTTGGCTGA	CDS
IP_091933.1	MS	LRP2	ATGCTACCAATCCGTGTAAAGATAACAATGGGGGCTGTGAGCAGGTCTGTGTCCTCAGCCACAGAACAGATAATGATGGTTTGGGTTTCCGTTGCAAGTGCACATTCGGCTTCCAACTGGATACAGATGAGCGCCACTGCATTGCTGTTCAGAATTTCCTCATTTTTTCATCCCAAGTTGCTATTCGTGGGATCCCGTTCACCTTGTCTACCCAGGAAGATGTCATGGTTCCAGTTTCGGGGAATCCTTCTTTCTTTGTCGGGATTGATTTTGACGCCCAGGACAGCACTATCTTTTTTTCAGATATGTCAAAACACATGA	CDS
IP_091991.1	RP	PPIG	ATGAGAAGGAAAGGAAAAACAGAGAGAGAGAAAGGGAAAGAGAGTGTAATCCACCTAACTCCCAGCCTGCTTCATACCAGAGACGACTTTTAG	CDS
IP_091994.1	RP	PPIG	ATGTGTGCCCCAAAACATGCGAGAACTTTCGTTGTCTTTGTACAGGTGAAAAGGGGACCGGGAAATCAACTCAGAAACCATTACATTATAAGAGTTGTCTCTTTCACAGAGTTGTCAAGGATTTTATGGTTCAAGGTGGTGACTTCAGTGAAGGAAATGGACGAGGAGGGGAATCTATCTATGGAGGATTTTTTGAAGACGAGAGTTTCGCTGTTAAACACAACAAAGAATTTCTCTTGTCAATGGCCAACAGAGGGAAGGATACAAATGGTTCACAGTTCTTCATAA	CDS
IP_092034.1	RP	UBR3	ATGCTCATGGAGAGGAAGACCGGGATCTTAGGCGAGGCAAACCTCTCTACATTTGTAAGGAAAGATACAAAGTTCTTGAGCAACAGTGGATTTCTCATACTTTTGATCACATCAATAAAAGATGGGGTCCACATTACAATGGGCTGTGACTCTCCACCTCAGCATTGCATCGTATCATCATTTTCGCTACGAATTTATTTTTCAACAATAAGCTTTAACTTAATTTGGGGGATTAACACTTTTGCTGAGGGAGAAAAAGAAAACATACATTATGAAGCCTTTCCAAAATTAGGTGCTTGGTAA	CDS
IP_092036.1	RP	UBR3	ATGAAGAAGGAACTCAGGAATGTGCAATGGTTAACCCTATTGCTTGGTCTCCTGAATCCATGGAAAAATGCTTACAGGACTTCTGCTTACCTTTTCTCAGAATCACCAGCCTTCTTCAGCACCACCTTTTTGGGGAAGATTTACCTAGCTGCCAGGAAGAAGAAGAATTTTCAGTTCTTGCCAGCTGCCTGGGACTTCTGCCAACGTTTTACCAAACAGAACATCCATTCATCAGTGCCTCCTGTCTGGATTGGCCAGTTCCAGCATTTGATATTATAA	CDS
IP_092060.1	MS	MYO3B	ATGAGCAAATCCAGTACTATTTCAATCAGCATGTTTTTGCTCTTGAGCAGATGGAATATCAGAATGAAGGCATTGATGCTGTACCCGTGGAATATGAGGACAACCGCCCGCTCTTGGACATGTTCCTCCAGAAACCCCTGGGACTGCTTGCACTTTTGGATGAGGAAAGTCGGTTTCCCCAAGCAACTGACCAGACCCTGGTTGATAAATTTGAAGATAATCTACGATGCAAATACTTCTGGAGGCCCAAAGGAGTGGAACTGTGCTTTGGCATTCAGCATTATGCTGGAAAGGTATTATATGATGCTTCTGGGGTTCTTGAGAAAAATAGAGACACTCTCCCTGCCGATGTGGTTGTGGTCCTGA	CDS
IP_092105.1	RP	TLK1	ATGAAAGTAGTCAGGGAAAAAGTATTGGGGGACGTGGCCACAAAATTAGCGACTATTTTGAATACCAGGGTGGAAATGGCTCAAGTCCAGTAA	CDS
IP_092120.1	RP	METTL8	ATGGAAGATATGATAAGACTCAGCTTCGTTTTAAAAAGGGACATTGTTTATCTGAAAATTTTTATGTTCGAGGAGATGGTACCAGAGCATATTTCTTTACAAAAGGGGAAGTCCACAGTATGTTCTGCAAAGCCAGTTTAG	CDS
IP_092172.1	RP	DYNC1I2	ATGTCAACAACTTTGTTGTTGGGAGTGAAGAAGGTTCTGTGTACACAGCATGCCGCCATGGCAGCAAAGCTGGAATCAGTGAGATGTTTGAGGGGCATCAAGGACCAATCACTGGCATCCATTGTCATGCAGCTGTTGGAGCAGTAG	CDS
IP_092178.1	RP	DYNC1I2	ATGCAGACTATGTTTATGATGTTATGTGGTCACCTACCCACCCAGCCCTGTTTGCCTGTGTGGATGGCATGGGGAGATTGGATTTGTGGAATCTCAATAATGACACAGAGGTACCAACTGCCAGCATTTCTGTGGAGGGTAATCCTGCTCTTAATCGTGTGA	CDS
IP_092182.1	RP	DYNC1I2	ATGGCGCCGTGGGATCTAGACGAGGACCTATTAAACTTGGAATGGCTAAAATCACGCAAGTCGACTTTCCTCCTCGAGAAATTGTCACGTATACAAAGGAAACTCAGACTCCAGTTATGGCTCAACCCAAAGAAGATGAAGAGGAAGATGATGATGTAG	CDS
IP_092196.1	RP	SLC25A12	ATGTGCTCCGGGACTTGGGAATTTTTGGTCTGTATAAGGGTGCCAAAGCGTGTTTCCTCCGAGACATTCCCTTCTCTGCAATCTATTTTCCTGTTTATGCTCATTGCAAACTACTTCTGGCTGATGAAAATGGACACGTGGGAGGTTTAA	CDS
IP_092264.1	RP	ZAK	ATGAGATGTCGTCTCTCGGTGCCTCCTTTGTGCAAATTAAATTTGATGACTTGCAGTTTTTTGAAAACTGCGGTGGAGGAAGTTTTGGGAGTGTTTATCGAGCCAAATGGATATCACAGGACAAGGAGGTGGCTGTAA	5'UTR
IP_092324.1	RP	OLA1	ATGCAGTCAAGGCTGCTGGAAAGTACAGACAACAAGGCAGAAATTATATTGTTGAAGATGGAGATATTATCTTCTTCAAATTTAACACACCTCAACAACCGAAGAAGAAATAAAATTTAG	CDS
IP_092396.1	MS	ATF2	ATGAGAAGGAAGTACCATTGGCACAAACTGCACAGCCCACATCAGCTATTGTTCGTCCAGCATCATTACAGGTTCCCAATGTGCTGCTTACAAGTTCTGACTCAAGTGTAA	CDS
IP_092397.1	RP	ATF2	ATGGACAAACCATGCCTGTTGCTATTCCTGCATCAATTACAAGTTCTAATGTGCATGTTCCAGCTGCAGTCCCACTCGTTCGACCAGTCACCATGGTGCCTAGTGTTCCAGGAATCCCAGGTCCTTCCTCTCCCCAACCAGTACAGTCAGAAGCAAAAATGA	CDS
IP_092486.1	RP	HNRNPA3	ATGGGGCACACTCACAGATTGTGTGGTAATGAGAGACCCCCAAACAAAACGTTCCAGGGGCTTTGGTTTTGTGACTTATTCTTGTGTTGA	CDS
IP_092777.1	MS	TTN	ATGGTCAGCCACTGTCCCTCGGGCCTAACATTGAAATTATCCATGAAGGCTTGGATTATTATGCTCTGCACATCAGGGACACTTTGCCTGAAGACACGGGTTATTATAGAGTCACAGCCACTAACACAGCTGGGTCCACCAGCTGCCAGGCTCACCTACAAGTGGAACGCCTGA	CDS
IP_092783.1	MS	TTN	ATGTGGTGTTTGAGGTTGAGCTGTCCCACTCTGGAATTGATGTCCTGTGGAATTTTAAGGACAAGGAAATCAAGCCCAGTTCTAAATATAAAATTGAAGCACATGGAAAAATATATAAATTGA	CDS
IP_092903.1	MS	SESTD1	ATGCTCTGCTTAAGACTCACATCAGATTGGGCGATGATGCTCAAGAAACGAAAGTTTTGCTGGAAAAGCATAGAAAATTTGTTGATGTTGCACAGAGCACTTATGACTATGGCAGGCAGTTGCTACAGGCCACAGTTGTGTTATGCCAATCTTTGCGCTGCACTTCTCGGTCATCTGGGGATACACTTCCTCGACTGA	CDS
IP_092942.1	RP	UBE2E3	ATGATGAGAGCCCCAGCACCAGCAGTGGCAGTTCAGATGCGGACCAGCGAGACCCAGCCGCTCCAGAGCCTGAAGAACAAGAGGAAAGAAAACCTTCTGCCACCCAGCAGAAGAAAAACACCAAACTCTCTAGCAAAACCACTGCTAAGTTATCCACTAGTGCTAAAAGAATTCAGAAGGAGCTAG	CDS
IP_092955.1	RP	ITGA4	ATGCAGATGGCTTCTCAGATCTGCTCGTGGGAGCACCCATGCAGAGCACCATCAGAGAGGAAGGAAGAGTGTTTGTGTACATCAACTCTGGCTCGGGAGCAGTAA	CDS
IP_093057.1	RP	DNAJC10	ATGAGGGACTCTGTAACATGTATAACATTCAGGCTTATCCAACAACAGTGGTATTCAACCAGTCCAACATTCATGAGTATGAAGGACATCACTCTGCTGAACAAATCTTGGAGTTCATAG	CDS
IP_093142.1	RP	ZC3H15	ATGGTGAAAGAAGTGACTTGGAAGAGGACAACGAGAGGGAGGGAACGGAAAATGGAGCCATTGATGCTGTTCCTGTTGATGAAAATCTTTTCACTGGAGAGGATTTGGATGAACTAG	CDS
IP_093314.1	RP	PMS1	ATGGACCATTACCTAGTACAAATTCTTATGAAAATAATAAAACAGATGTTTCCGCAGCTGACATCGTTCTTAGTAAAACAGCAGAAACAGATGTGCTTTTTAATAAAGTGGAATCATCTGGAAAGAATTATTCAAATGTTGATACTTCAGTCATTCCATTCCAAAATGATATGCATAATGATGAATCTGGAAAAAACACTGATGATTGTTTAA	CDS
IP_093348.1	RP	HIBCH	ATGCTGTTGGTTCTTGCCAGAAACCTTATGTTGCACTTATTCATGGAATTACAATGGGTGGGGGAGTTGGTCTCTCAGTCCATGGGCAATTTCGAGTGGCTACAGAAAAGTGTCTTTTTGCTATGCCAGAAACTGCAATAG	CDS
IP_093429.1	RP	STAT1	ATGAAATCAAGAGCCTGGAAGATTTACAAGATGAATATGACTTCAAATGCAAAACCTTGCAGAACAGAGAACACGAGACCAATGGTGTGGCAAAGAGTGATCAGAAACAAGAACAGCTGTTACTCAAGAAGATGTATTTAA	CDS
IP_093506.1	MS	DNAH7	ATGGGTTGGATTATTTGGCTTTGGGAAAATTCTTTAAGGGACTGTTATCTTGTGGAGCCTGGGCTTGCTTTGATGAGTTTAACAGAATTGATTTGGAAGTACTCTCTGTGGTTGCTCAACAAATCCTTACTATCCAAAGAGGTATTAATGCAGGTGCTGATATACTGA	CDS
IP_093517.1	RP	STK17B	ATGGAACCTGTGGTGATAGAGAAGACAAAGAGAATATCCCAGAGGATAGCAGCATGGTTTCCAAAAGATTTCGTTTCGATGACTCATTACCCAATCCCCATGAACTTGTTTCAGATTTGCTCTGTTAGCACTTTTTTCTTTGACTCATTTGGACTGAATTTGAAATTTTATATCCACTCCAGTGAGATTATGATTTGTAGCTTCATATATGACATGTTTATATTGTAA	CDS
IP_093561.1	RP	GTF3C3	ATGTTGCTGAAGCTTTTCTGGATGTTGGTGAATATAATTCTGCACTTCCCCTCCTCAGTGCTCTTGTTTGCTCTGAAAGATACAACCTTGCAGTAG	CDS
IP_093644.1	RP	SF3B1	ATGATGACGATGACTATTCATCATCTACGAGTTTGCTTGGTCAGAAGAAGCCAGGATATCATGCCCCTGTGGCATTGCTTAATGATATACCACAGTCAACAGAACAGTATGATCCATTTGCTGAGCACAGACCTCCAAAGATTGCAGACCGGGAAGATGAATACAAAAAGCATAGGCGGACCATGA	CDS
IP_093645.1	RP	SF3B1	ATGAGACACCAGGTCGTGCAAAGGGAAGCGAGACTCCTGGAGCAACCCCAGGCTCAAAAATATGGGATCCTACACCTAGCCACACACCAGCGGGAGCTGCTACTCCTGGACGAGGTGATACACCAGGCCATGCGACACCAGGCCATGGAGGCGCAACTTCCAGTGCTCGTAAAAACAGATGGGATGAAACCCCCAAAACAGAGAGAGATACTCCTGGGCATGGAAGTGGATGGGCTGAGACTCCTCGAACAGATCGAGGTGGAGATTCTATTGGTGAAACACCGACTCCTGGAGCCAGTAAAAGAAAATCACGGTGGGATGAAACACCAGCTAGTCAGATGGGTGGAAGCACTCCAGTTCTGA	CDS
IP_093646.1	RP	SF3B1	ATGAAGCTCAAGGAGTGGGCCTCGATTCTACAGGTTATTATGACCAGGAAATTTATGGTGGAAGTGACAGCAGATTTGCTGGATACGTGA	CDS
IP_093650.1	RP	SF3B1	ATGGAAGGGTATCCGCCAACACAGAGGAAAGGGTTTGGCTGCTTTCTTGAAGGCTATTGGGTATCTTATTCCTCTTATGGATGCAGAATATGCCAACTACTATACTAG	CDS
IP_093657.1	RP	COQ10B	ATGGGAGACTTTTCAATCATTTGGAGACTATTTGGCGTTTTAGCCCAGGTCTTCCTGGCTACCCAAGAACTTGTACCTTGGATTTTTCAATTTCTTTTGAATTTCGATCACTTCTACATTCCCAGCTTGCCACACTCTTTTTTGATGAAGTTGTGA	CDS
IP_093781.1	RP	KCTD18	ATGCCACAAAAACTGATGGAACAGACGCTATTGAAAAGCAGCTGGGAGGAAGAATTCACAGCAAAGGCATTTTTAAAAGAGAGGCGGGAAATAATGTTCAGTACATTTGGAGCTATTATTCAGTAG	CDS
IP_093814.1	RP	BZW1	ATGCTTCTGGAGCAAAACTTGATTACCGTCGATATGCAGAAACACTCTTTGACATTCTGGTGGCTGGTGGAATGCTGGCCCCAGGTGGTACACTGGCAGATGACATGA	CDS
IP_093823.1	RP	CLK1	ATGAGAAAGATTATCATAGTCGACGCTACATTGATGAGTACAGAAATGACTACACTCAAGGATGTGAACCTGGACATCGCCAAAGAGACCATGAAAGCCGGTATCAGAACCATAGTAGCAAGTCTTCTGGTAGAAGTGGAAGAAGTAGTTATAAAAGCAAACACAGGATTCACCACAGTACTTCACATCGTCGTTCACATGGGAAGAGTCACCGAAGGAAAAGAACCAGGAGTGTAG	CDS
IP_093824.1	RP	CLK1	ATGACAAGGATTGGGATTATGGAAAATGGAGGAGCAGCAGCAGTCATAAAAGAAGGAAGAGATCACATAGCAGTGCCCAGGAGAACAAGCGCTGCAAATACAATCACTCTAAAATGTGTGATAGCCATTATTTGGAAAGCAGGTCTATAA	CDS
IP_093849.1	MS	FAM126B	ATGCAGCAACTTTACACCGGAAAAAAACACTTGTACCAGCCCTCTATAAAGTTATTCAAGATTCAAATAATGAGCTCCTGGAGCCTGTCTGCCATCAGCTGTTTGAGCTCTATCGTAGCTCAGAGGTTCGACTTAAGAGGTTCACACTGCAGTTCTTGCCAGAATTGA	CDS
IP_094471.1	RP	NDUFS1	ATGATTTGGGAACAACAGGCAGAGGAAATGATATGCAAGTTGGCACATACATTGAAAAGATGTTCATGTCTGAACTGTCTGGGAATATCATTGATATCTGCCCTGTAG	CDS
IP_094482.1	MS and RP	NDUFS1	ATGGTCAGTCTGTCATGGTGGAACCGGGAACGACCGTCCTCCAAGCTTGTGAGAAGGTTGGCATGCAGATCCCTCGATTCTGTTATCATGAAAGGTTGTCTGTTGCTGGAAACTGCAGGATGTGCCTTGTTGAAATTGAGAAAGCCCCTAAGGTTGTAG	CDS
IP_094512.1	MS	ADAM23	ATGAAACTGCAGAAAAAAATTTGGGAGTCCTGGCAGATGAAGACAATACATTGCAACAGAATAGCAGCAGTAATATCAGTTACAGCAATGCAATGCAGAAAGAAATCACACTGCCTTCAAGACTCATATATTACATCAACCAAGACTCGGAAAGCCCTTATCACGTTCTTGACACAAAGGCAAGACACCAGCAAAAACATAATAAGGCTGTCCATCTGGCCCAGGCAAGCTTCCAGATTGAAGCCTTCGGCTCCAAATTCATTCTTGACCTCATACTGA	CDS
IP_094520.1	RP	ADAM23	ATGGAGACCGGTGGATTCAGTGCAGCAAACATGATGTGTTCTGTGGATTCTTACTCTGTACCAATCTTACTCGAGCTCCACGTATTGGTCAACTTCAGGGTGAGATCATTCCAACTTCCTTCTACCATCAAGGCCGGGTGA	CDS
IP_094738.1	RP	IDH1	ATGATGGGCGTTTTAAAGACATCTTTCAGGAGATATATGACAAGCAGTACAAGTCCCAGTTTGAAGCTCAAAAGATCTGGTATGAGCATAGGCTCATCGACGACATGGTGGCCCAAGCTATGA	CDS
IP_094744.1	RP	PIKFYVE	ATGACTGTAGTGAGAAATTTACAACCTTTAGGCGCAGACACCATTGCCGACTATGTGGGCAGATTTTCTGCAGTCGTTGCTGTAATCAAGAAATCCCTGGAAAATTTATGGGCTATACAGGAGACCTCCGAGCTTGCACATATTGTAGAAAAATAG	CDS
IP_094750.1	RP	PIKFYVE	ATGCTGGGAAATCTCCTGCTCGAAATAGATCAGCCAGCATTACTAACCTGTCACTGGATAGATCTGGTTCTCCTATGGTACCTTCATATGAGACATCTGTCAGTCCCCAGGCTAACCGAACATATGTTAGGACAGAGACCACTGAGGATGAACGCAAAATTCTTCTGGACAGTGTGCAGTTAA	CDS
IP_094887.1	RP	KANSL1L	ATGATGCAAAAAATGGCTTTGCACGGTGTACAGCTGCGGAAATCCAAAGATTTGCATTTTCTGCTACAGGGCTGTTGTCTCATGTTGAAGAGGGTTTGGATTCCGATGCAACTGATAGCAGCTCTGATGACGATTTGGATGAATATACCCTTAGAAAAAATGTGGCAGTTAACTGTAGTACTGAATGGAAGTGGCTTGTAG	CDS
IP_094986.1	RP	IKZF2	ATGAAAACAACATGGATGGCCCCATCTCTCTCATCAGACCAAAGAGTCGACCCCAGGAAAGAGAGGCCTCTCCCAGCAATAGCTGCCTGGATTCCACTGACTCAGAAAGCAGCCATGATGACCACCAGTCCTACCAAGGACACCCTGCCTTAA	CDS
IP_095049.1	RP	BARD1	ATGAAATTCCTGAAGGTCCACGCAGAAGCAGGCTCAACAGAGAACAGCTGTTGCCAAAGCTGTTTGATGGATGCTACTTCTATTTGTGGGGAACCTTCAAACACCATCCAAAGGACAACCTTATTAAGCTCGTCACTGCAGGTGGGGGCCAGATCCTCAGTAGAAAGCCCAAGCCAGACAGTGACGTGA	CDS
IP_095079.1	RP	FN1	ATGCTACTGAGACCACCATCACCATTAGCTGGAGAACCAAGACTGAGACGATCACTGGCTTCCAAGTTGATGCCGTTCCAGCCAATGGCCAGACTCCAATCCAGAGAACCATCAAGCCAGATGTCAGAAGCTACACCATCACAGGTTTACAACCAGGCACTGACTACAAGATCTACCTGTACACCTTGA	CDS
IP_095081.1	RP	FN1	ATGCGTTGGTTTGTACTTGTTATGGAGGAAGCCGAGGTTTTAACTGCGAGAGTAAACCTGAAGCTGAAGAGACTTGCTTTGACAAGTACACTGGGAACACTTACCGAGTGGGTGACACTTATGAGCGTCCTAAAGACTCCATGA	CDS
IP_095101.1	RP	FN1	ATGGAATCCATGAGCTATTCCCTGCACCTGATGGTGAAGAAGACACTGCAGAGCTGCAAGGCCTCAGACCGGGTTCTGAGTACACAGTCAGTGTGGTTGCCTTGCACGATGATATGGAGAGCCAGCCCCTGA	CDS
IP_095284.1	RP	ARPC2	ATGACGACGATGTGGTCATTGGAAAGGTGTTCATGCAGGAGTTCAAAGAAGGACGCAGAGCCAGCCACACAGCCCCACAGGTCCTCTTTAGCCACAGGGAACCTCCTCTGGAGCTGA	CDS
IP_095294.1	RP	AAMP	ATGGGACCTTGGCCATCTATGACCTGGCTACGCAGACTCTTAGGCATCAGTGTCAGCACCAGTCGGGCATCGTGCAGCTGCTGTGGGAGGCAGGCACTGCCGTGGTATATACCTGCAGCCTGGATGGCATCGTGCGCCTCTGGGACGCCCGGACCGGCCGCCTGCTTACTGACTACCGGGGCCACACGGCTGAGATCCTGGACTTTGCCCTCAGCAAAGATGCCTCCCTGGTGGTGA	CDS
IP_095314.1	RP	TMBIM1	ATGAAGACCGCAACCCCCTGTACCCAGGCCCTCCGCCCCCTGGGGGCTATGGGCAGCCATCTGTCCTGCCAGGAGGGTATCCTGCCTACCCTGGCTACCCGCAGCCTGGCTACGGTCACCCTGCTGGCTACCCACAGCCCATGCCCCCCACCCACCCGATGCCCATGA	CDS
IP_095584.1	RP	CNPPD1	ATGGCTGGGACTGGGAAGCCGACTGTAGCCTGGAGGAGCTCTCCAGCCCGGTGGCAGACATTGCTGTCGAACTGCTCCAGAAGGCAGCCCCCAGCCCTATTCGCCGACTCCAGAAGAAATATGTAG	CDS
IP_095585.1	RP	CNPPD1	ATGATGAAGGGGAGGAGGAGGAGGTCTTCAACGACGAATGGGGAGCTGCTGGGGGTGTGGCCGTGCCCACTCTCAATGCCTTGGAGAGGGGCTTCCTGA	CDS
IP_095588.1	RP	CNPPD1	ATGGGGAGCTGCTGGGGGTGTGGCCGTGCCCACTCTCAATGCCTTGGAGAGGGGCTTCCTGAGTGCCATGGATTGGCATCTCTACACTGA	CDS
IP_095601.1	MS	FAM134A	ATGCCCTGCATCACAAACACGACAAGAGGAAGCGTCAGGGGAAGAATGCACCCCCAGGAGGTGATGAGCCACTGGCAGAGACAGAGAGTGAAAGCGAGGCAGAGCTGGCTGGCTTCTCCCCAGTGGTGGATGTGA	CDS
IP_095701.1	MS	PTPRN	ATGTGGGCAGAGGGACTTAGAGACCGGCTGCGAGACCACAGGAGAAGCCACTTGCTCCGAGGCGCCTGGGAGGCTGTCTATTTGACCGCAGGCTCTGCTCTCACCTGGAAGTCTGTATTCAGGATGGCTTGTTTGGGCAGTGCCAGGTGGGAGTGGGGCAGGCCCGGCCCCTTTTGCAAGTCACCTCCCCAGTTCTCCAACGCTTACAAGGTGTGCTCCGACAACTCATGTCCCAAGGATTGTCCTGGCACGATGACCTCACCCAGTATGTGA	5'UTR
IP_095723.1	MS	SPEG	ATGAGGCCCTGGGGACCCCAGAGACTGGGGCTGCCACCCCCATGGACTGGCAGGAGCAGGGAAGGGCTCCCTCTCAGGACCAGGAGGCTCCCAGCCCAGAGGCCCTCCCCTCCCCAGGCCAGGAGCCCGCAGCTGGGGCTAGCCCCAGGCGGGGAGAGCTCCGCAGGGGCAGCTCGGCTGAGAGCGCCCTGCCCCGGGCCGGGCCGCGGGAGCTGGGCCGGGGCCTGCACAAGGCGGCGTCTGTGGAGCTGCCGCAGCGCCGGAGCCCCAGCCCGGGAGCCACCCGCCTGGCCCGGGGAGGCCTGGGTGAGGGCGAGTATGCCCAGAGGCTGCAGGCCCTGCGCCAGCGGCTGCTGCGGGGAGGCCCCGAGGATGGCAAGGTCAGCGGCCTCAGGGGTC…	CDS
IP_095737.1	MS	SPEG	ATGCTGGTTTCTACACTTGCAAAGCGGTCAATGAGTATGGTGCTCGGCAGTGCGAGGCCCGCTTGGAGGTCCGAGCACACCCTGAAAGCCGGTCCCTGGCCGTGCTGGCCCCCCTGCAGGACGTGGACGTGGGGGCCGGGGAGATGGCGCTGTTTGAGTGCCTGGTGGCGGGGCCCACTGACGTGGAGGTGGATTGGCTGTGCCGTGGCCGCCTGCTGCAGCCTGCACTGCTCAAATGCAAGATGCATTTCGATGGCCGCAAATGCAAGCTGCTACTTACATCTGTACATGAGGACGACAGTGGCGTCTACACCTGCAAGCTCAGCACGGCCAAAGATGAGCTGA	CDS
IP_095816.1	MS	OBSL1	ATGCCCCTGTGCGCTGGTACAAGGATGGGCTGGAAGTGGAGGAGAGCGAGGCCCTGGTGCTGGAGAGGGATGGGCCACGCTGCCGCCTGGTGCTACCTGCTGCTCAGCCCGAGGACGGGGGCGAGTTTGTATGTGATGCTGGAGATGACTCGGCCTTCTTCACTGTCACTGTCACAGCCCCACCAGAGAGGATTGTGCACCCGGCAGCCCGCTCCCTGGATCTGCATTTTGGGGCTCCAGGGCGCGTGGAGCTGCGCTGTGAGGTGGCCCCAGCTGGGTCTCAGGTGCGCTGGTACAAGGACGGGCTGGAAGTGGAGGCATCAGATGCCCTGCAGCTGGGTGCCGAGGGGCCCACCCGCACCCTGA	CDS
IP_095953.1	RP	ACSL3	ATGAAGCAAAAACAAAAGCTGATTTCTTTGAAGATGAAAATGGACAAAGGTGGCTCTGTACTGGGGATATTGGAGAGTTTGAACCCGATGGATGCTTAA	CDS
IP_095985.1	RP	WDFY1	ATGGGCTGCCTGCCGAGGAGGCCGCAGCAGTCGCCGCGCGAACATGGCGGCCGAAATCCACTCCAGGCCGCAGAGCAGCCGCCCGGTGCTGCTGAGCAAGATCGAGGGGCACCAGGACGCCGTCACGGCCGCGCTGCTCATCCCCAAGGAGGACGGCGTGATCACGGCCAGCGAGGACAGAACCATCCGGGTATGGCTGAAAAGAGACAGTGGTCAATACTGGCCCAGCATTTACCACACAATGGCCTCTCCTTGCTCTGCTATGGCTTACCATCATGA	5'UTR
IP_096037.1	RP	DOCK10	ATGAGACTGTCATTGAAGAACTTGAAAAGACCTACCGGAATGATCCTCTTCAAGATCTCTTGTTCTTCCCCAGTGATGACTTTTCAGCAGCCACAGTTTCCTGGGATATCCGCACGTTGTACTCAACAGTACCTGAAGATGCAGAGCACAAGGCAGAAAATTTACTGGTTAAGGAGGCTTGTAAATTTTATAGTTCCCAGTGGCATGTGGTAA	CDS
IP_096125.1	MS and RP	COL4A4	ATGAAGGAGAAATGGCTATCATTTCACAAAAGGGAACACCTGGGGAACCTGGACCTCCTGGAGATGATGGATTCCCAGGAGAAAGAGGTGATAAAGGAACTCCCGGGATGCAAGGGAGAAGAGGAGAGCCGGGAAGATACGGACCACCTGGATTTCACAGAGGGGAACCTGGTGAGAAAGGTCAGCCAGGGCCTCCTGGACCCCCAGGCCCTCCAGGCTCAACTGGTCTAA	CDS
IP_096202.1	RP	MFF	ATGCTGTTCGCCAAAATGGACAGCTGGTCAGAAATGATTCTCTACCTGTGTTGCGTGGTGGGTCTGCTGCCGCCACTTCTAATCCTCATCATGACAACGTCAGGTATGGCATTTCAAATATAG	CDS
IP_096231.1	RP	AGFG1	ATGCTAATTTTGCTCATTTTGATAACTTCCCCAAATCCTCCAGTGCTGATTTTGGAACCTTCAATACTTCCCAGAGTCATCAAACAGCATCAGCTGTTAGTAAAGTTTCAACGAACAAAGCTGGTTTACAGACTGCAGACAAATATGCAGCACTTGCTAATTTAG	CDS
IP_096233.1	RP	AGFG1	ATGAAAAGAAAAGATGGTATGTCCCGCCAGAACAAGCCAAAGTCGTGGCATCAGTTCATGCATCTATTTCAGGGTCCTCTGCCAGTAGCACAAGCAGCACACCTGAGGTCAAACCACTGA	CDS
IP_096343.1	RP	TRIP12	ATGAAGGCGTTTCTAGGCAATTTGATTCGTTCAGAGATGGATTTGAATCAGTCTTCCCACTCAGTCATCTTCAGTACTTCTACCCGGAGGAACTGGATCAGCTCCTTTGTGGCAGTAAAGCAGACACTTGGGATGCAAAGACACTGA	CDS
IP_096527.1	RP	PSMD1	ATGATCACAAGTATAAACAGGCTATTGGCATTGCTCTGGAGACACGAAGACTGGACGTCTTTGAAAAGACCATACTGGAGTCGAATGATGTCCCAGGAATGTTAG	CDS
IP_096528.1	RP	PSMD1	ATGATAAGCATGATGATGTCATGGCCAAGTTTGGCGCTATTCTGGCCCAGGGCATACTGGATGCAGGTGGTCATAATGTCACAATCTCCTTGCAGTCCAGGACTGGGCATACTCATATGCCTTCTGTGGTTGGCGTCCTTGTATTTACCCAGTTTTGGTTCTGGTTTCCTCTTTCACACTTCCTGTCATTGGCTTATACCCCTACCTGTGTCATTGGCCTTAACAAGGACTTAA	CDS
IP_096572.1	RP	NCL	ATGCCAAAGCTGCCAAGGAGGCCATGGAAGACGGTGAAATTGATGGAAATAAAGTTACCTTGGACTGGGCCAAACCTAAGGGTGAAGGTGGCTTCGGGGGTCGTGGTGGAGGCAGAGGCGGCTTTGGAGGACGAGGTGGTGGTAGAGGAGGCCGAGGAGGATTTGGTGGCAGAGGCCGGGGAGGCTTTGGAGGGCGAGGAGGCTTCCGAGGAGGCAGAGGAGGAGGAGGTGACCACAAGCCACAAGGAAAGAAGACGAAGTTTGAATAGCTTCTGTCCCTCTGCTTTCCCTTTTCCATTTGAAAGAAAGGACTCTGGGGTTTTTACTGTTACCTGA	CDS
IP_096600.1	RP	PDE6D	ATGCTGAGACAGGGAAGATACTCTGGCAAGGAACAGAAGACCTGTCTGTCCCTGGTGTGGAGCATGAAGCCCGTGTTCCCAAGAAAATCCTCAAGTGCAAGGCAGTGTCTCGAGAACTTAATTTTTCTTCGACAGAACAAATGGAAAAATTCCGCCTGGAACAAAAAGTTTACTTCAAAGGGCAATGCCTAG	CDS
IP_096690.1	RP	EIF4E2	ATGATGACAGTGGGGACCATGATCAGAATGAAGAAAACAGCACACAGAAAGATGGTGAGAAGGAAAAAACGGAACGAGACAAGAATCAGAGCAGTAGCAAGAGAAAGGCTGTTGTCCCTGGACCGGCAGAGCATCCCCTGCAGTACAACTACACTTTTTGGTACTCCAGGAGAACCCCCGGCCGTCCCACGAGCTCACAGAGCTATGAACAGAATATCAAACAGATTGGCACCTTTGCCTCTGTGGAGCAGTTCTGGAGGTTTTATAGCCACATGGTACGTCCTGGGGACCTGA	CDS
IP_096730.1	RP	GIGYF2	ATGAAGCAATGCAGAAGTGGTATTACAAAGATCCTCAGGGAGAAATTCAAGGTCCCTTCAATAATCAGGAGATGGCAGAATGGTTTCAGGCGGGCTATTTTACTATGTCTTTATTGGTGA	CDS
IP_096735.1	RP	GIGYF2	ATGGAGAGAGGTGGCGACCTCACAGTCCTGATGGCCCTCGTTCTGCAGGCTGGCGGGAACACATGGAACGACGTCGGAGGTTTGAGTTTGATTTTCGAGATAGAGATGATGAACGGGGTTACCGAAGGGTTCGCTCTGGCAGTGGGAGCATAG	CDS
IP_097029.1	RP	COL6A3	ATGGCTCATCTGCACTGGGACTGGCCAACTTCAATGCCATCCGAGACTTCATTGCTAAAGTCATCCAGAGGCTGGAAATCGGACAGGATCTTATCCAGGTGGCAGTGGCCCAGTATGCAGACACTGTGA	CDS
IP_097033.1	RP	COL6A3	ATGGTCTGGATGGTGAAGATGGAGACAAAGGATTGCCTGGTTCTTCTGGAGAGAAAGGGAATCCTGGAAGAAGGGGTGATAAAGGACCTCGAGGAGAGAAAGGAGAAAGAGGAGATGTTGGGATTCGAGGGGACCCGGGTAACCCAGGACAAGACAGCCAGGAGAGAGGACCCAAAGGAGAAACCGGTGACCTCGGCCCCATGGGTGTCCCAGGGAGAGATGGAGTACCTGGAGGACCTGGAGAAACTGGGAAGAATGGTGGCTTTGGCCGAAGGGGACCCCCCGGAGCTAAGGGCAACAAGGGCGGTCCTGGCCAGCCGGGCTTTGAGGGAGAGCAGGGGACCAGAGGTGCACAGGGCCCAGCTGGTCCTGCTGGTCCTCCAGGGCTGA	CDS
IP_097354.1	RP	NDUFA10	ATGGGAAGCCCCTCGCCACCGACTATAATGGCAACTGTAGTTTGGAGAAATTTTACGATGATCCGAGAAGCAATGATGGCAACAGTTACCGCCTGCAGTCCTGGTTGTACAGCAGTCGCCTGCTGCAGTACTCAGATGCCTTGGAGCACTTGCTGA	CDS
IP_097676.1	RP	HDLBP	ATGCCTTCCCTCCACTTCCTGAGAAAGCTGCTTGCCTGGAAAGTGCCCAGGAACCCGCTGGAGCCTGGGGGAACAAGATCCGACCCATCAAGGCTTCTGTCATCACTCAGGTGTTCCATGTACCCCTGGAGGAGAGAAAATACAAGGATATGA	CDS
IP_100097.1	RP	CRBN	ATGGAAGTTTACGGCCACCAAAAAAGACATGTCACCTCAAAAATTTTGGGGCTTAACGCGATCTGCTCTGTTGCCCACGATCCCAGACACTGA	CDS
IP_100340.1	MS	SETD5	ATGGTGTGCAGGGATCCTCAGCCCGAACTCCATCTTCCCCTCACAAAAAATTCTCCCCATCTCATTCCTCTATGTCCCATTTGGAGGCGGTAA	CDS
IP_100360.1	MS and RP	SETD5	ATGAGAAGAGCGTGTATTCCACTCATAATTATGGGACCACTCAGAGGCATGGGTGTCGAGGACTGCCTTATGCTACGATCATCCCTCGTTCTGACCTGA	5'UTR
IP_100389.1	RP	MTMR14	ATGGACGCTCAGGCTACAACTATTTTTTCTCAGGGGGTGCAGATGATGCCTGGGCAGATGTGGAGGACGTCACGGAGGAGGACTGTGCTCTTCGAAGTGGTGACACGCATCTTTTTGATAAGGTCAGAGGCTATGACATCAAGCTGCTTCGATACCTGTCAGTCAAATACATCTGTGACCTGA	CDS
IP_100457.1	RP	TADA3	ATGATGGCATCGGCATCGAGGAGCTGGACACCCTGCAGCTGGAGCTGGAGACCCTGCTGTCTTCTGCCAGCCGGCGCCTGCGTGTGCTTGAGGCCGAAACCCAGATCCTCACCGACTGGCAGGATAAGAAAGGTGACAGACGATTCCTGA	CDS
IP_100460.1	RP	TADA3	ATGAACTTGGAGCTCCCCCCAAACATGGGAAGCCCAAGAAGCAGAAACTGGAAGGGAAGGCAGGACATGGGCCGGGCCCTGGCCCAGGACGGCCCAAATCCAAAAACCTTCAGCCCAAGATCCAGGAATATGAATTCACTGATGACCCTATCGACGTGCCACGGATCCCCAAAAATGATGCCCCCAACAGGTTCTGGGCTTCAGTGGAGCCCTACTGTGCTGACATCACCAGCGAGGAGGTCCGCACACTTGAGGAGTTACTGA	CDS
IP_100495.1	RP	JAGN1	ATGGCAGCATGGAGATGTTCCCTGCTGCACAGCAGCTCTACCGCCATGGCAAGGCCTACCGTTTCCTCTTTGGTTTTTCTGCCGTTTCCATCATGTACCTGGTGTTGGTGTTGGCAGTGCAAGTGCATGCCTGGCAGTTGTACTACAGCAAGAAGCTCCTAG	CDS
IP_100564.1	MS	PRRT3	ATGAAGCCGAGGAGTGGCCGGGGCGCCCCCAAAGCCATCCCCCAGCACCCCCAGTCCAGGCCCCCTCGACGTCACGCCGGGGCCTCATTCGAGTCACCACGCAGCGAGCCCTGGGCCAGCCTCCCCCTCCGGAGCCCACCGCCAGCTCCATGGCTTCAGCCCCAGCCTCCAGCCCCCCAGCCAACGCCACTGCACCCCCGCTACGCTGGGGCCCCCTTCGGCGGGTCCTGA	CDS
IP_100652.1	RP	SEC13	ATGGCACCCGCCTGGCAACCTGCTCATCAGACAGGTCCGTCAAAATCTTTGATGTGCGCAATGGAGGGCAGATCCTTATCGCCGACCTCAGGGGTCATGAGGGTCCTGTGTGGCAAGTGGCCTGGGCTCACCCCATGTACGGCAACATCCTGGCATCGTGCTCCTATGACCGGAAAGTCATTATCTGGAGAGAGGAAAACGGCACCTGGGAGAAGAGCCACGAGCATGCGGGACACGACTCCTCAGTGA	CDS
IP_100996.1	RP	TMEM43	ATGTGGACATCATTCGCCGTGGAGACTTTTTCTACCACAGCGAAAATCCCAAGTATCCAGAGGTGGGAGACTTGCGTGTCTCCTTTTCCTATGCTGGACTGA	CDS
IP_101020.1	MS	SLC6A6	ATGCCTGAACAGTGGTACCAGTTTTGTGTCTGGCTTCGCAATTTTTTCCATCCTGGGCTTCATGGCACAAGAGCAAGGGGTGGACATTGCTGA	CDS
IP_101265.1	RP	ANKRD28	ATGCATTACTTCAACATGGTGCTAAGTGCTTACTTCGGGATAGCAGGGGCCGGACGCCTATACACCTGTCTGCTGCCTGTGGACACATTGGTGTTCTTGGAGCCCTTTTGCAGTCAGCAGCATCTATGGATGCAAATCCAGCCACAGCAGACAATCATGGATATACGGCACTTCACTGGGCTTGCTACAATGGTCACGAGACATGTGTAG	CDS
IP_101323.1	RP	DPH3	ATGACGAGGTGGAAATCGAGGACTTCCAATATGACGAGGACTCGGAGACGTATTTCTATCCCTGCCCATGTGGAGATAACTTCTCCATCACCAAGGAAGATTTGGAGAATGGGGAAGACGTGGCAACGTGTCCTAGCTGCTCTCTCATTATAA	CDS
IP_101398.1	RP	TBC1D5	ATGATGCCTATGCAGTGTTCTCACAACTTATGGAAACTGCTGAACCTTGGTTTTCAACTTTTGAGCATGATGGTCAGAAGGGGAAAGAAACACTGA	CDS
IP_101471.1	MS	EFHB	ATGTTCCCCCAGACTGCACATTTGGAGCTTGTCTCCGTCCTGAGGAATATGGAGTTGGTGATCTCATCCATAATAGACTTCCGGATGAATATCTTCGAGGCAAGGATAGACAGCGAGCCCTGA	CDS
IP_101614.1	RP	TOP2B	ATGATGAATCCAAGTCAGAAAGTGATTTGGAAGAAACAGAACCTGTGGTTATTCCAAGAGATTCTTTGCTTAGGAGAGCAGCAGCCGAAAGACCTAAATACACATTTGATTTCTCAGAAGAAGAGGATGATGATGCTGATGATGATGATGATGACAATAATGATTTAG	CDS
IP_101616.1	RP	TOP2B	ATGAAAGATCTATACCATCTCTTGTTGATGGCTTTAAACCTGGCCAGCGGAAAGTTTTATTTACCTGTTTCAAGAGGAATGATAAACGTGAAGTAA	CDS
IP_101618.1	RP	TOP2B	ATGAATATACATTTTCACCAGGCAAATCAAAAGCCACTCCAGAAAAATCTTTGCATGACAAAAAAAGTCAGGATTTTGGAAATCTCTTCTCATTTCCTTCATATTCTCAGAAGTCAGAAGATGATTCAGCTAAATTTGACAGTAATGAAGAAGATTCTGCTTCTGTTTTTTCACCATCATTTGGTCTGA	CDS
IP_101672.1	RP	SLC4A7	ATGCAAGCAGCCTTGTGTGTTATATTACTCGATTTACAGAAGAGGCTTTTGCAGCCCTTATTTGCATCATATTCATCTACGAGGCTTTGGAGAAGCTCTTTGATTTAG	CDS
IP_101701.1	RP	CMC1	ATGCAAAATGGAATACCTGAAGGAAAGGGAAGAATTCAGAAAAACTGGAATTCCTACAAAGAAAAGGCTACAGAAGCTTCCAACAAGCATGTAGGCAGATACTCAAATGACATTCAGGAACTCTAA	CDS
IP_101784.1	RP	STT3B	ATGGTATCCACTAGGAAGAATAGTAGGTGGTACTGTTTACCCAGGGTTGATGATAACCGCTGGCCTTATTCATTGGATTTTAAATACATTGAACATAACTGTTCACATAAGAGACGTATGTGTGTTCCTTGCACCAACTTTTAG	CDS
IP_101861.1	RP	DYNC1LI1	ATGCCATTAGTGTATTGGAGAAAGAACATGACTACAGAGATGAACATTTTGATTTTATTCAGTCACATATCCGGAAGTTTTGTTTACAGTATGGTGCAGCACTTATTTACACTTCAGTAA	CDS
IP_101889.1	RP	GLB1	ATGCAGTGTGCAGCCACCTGGGGGGCTGGGGACACCGTGACAGTGGCCACCATGATGAAGCCTGGGCCCACAACTCATCCAACTACACGCTCCCGGCCTTTTATATGGGGAACTTCTCCATTCCCAGTGGGATCCCAGACTTGCCCCAGGACACCTTTATCCAGTTTCCTGGATGGACCAAGGGCCAGGTCTGGATTAATGGCTTTAACCTTGGCCGCTATTGGCCAGCCCGGGGCCCTCAGTTGA	CDS
IP_102111.1	MS	TRANK1	ATGTCATTCTATGCCTCCCCAAGAGCTACATTGCACTCTTGCACTACTGGGAGTTCCTGTTTAGCAAGAAGGACAAGGAGCTTGGGGATGTGTTCTCCATCATTCAGGAATACAAACCCAAGGACGTGA	CDS
IP_102142.1	RP	MLH1	ATGTGGATGTTAATGTGCACCCCACAAAGCATGAAGTTCACTTCCTGCACGAGGAGAGCATCCTGGAGCGGGTGCAGCAGCACATCGAGAGCAAGCTCCTGGGCTCCAATTCCTCCAGGATGTACTTCACCCAGACTTTGCTACCAGGACTTGCTGGCCCCTCTGGGGAGATGGTTAAATCCACAACAAGTCTGA	CDS
IP_102147.1	RP	MLH1	ATGAGAGTGAAGTGCCTGGCTCCATTCCAAACTCCTGGAAGTGGACTGTGGAACACATTGTCTATAAAGCCTTGCGCTCACACATTCTGCCTCCTAAACATTTCACAGAAGATGGAAATATCCTGCAGCTTGCTAACCTGCCTGATCTATACAAAGTCTTTGAGAGGTGTTAAATATGGTTATTTATGCACTGTGGGATGTGTTCTTCTTTCTCTGTATTCCGATACAAAGTGTTGTATCAAAGTGTGA	CDS
IP_102160.1	RP	LRRFIP2	ATGATGGCACAGTGGGTGACCTGGCAGGACTGCAGAATGGCTCAGACTTGCAGTTCATCGAAATGCAGAGAGATGCCAATAGACAAATTAGCGAATACAAATTTAAGCTTTCAAAAGCAGAACAGGATATAA	CDS
IP_102327.1	RP	OXSR1	ATGATATTCGATTTGAATTTACTCCTGGGAGAGATACAGCAGAGGGTGTCTCTCAGGAACTCATTTCTGCTGGCCTGGTCGACGGAAGGGATTTAG	CDS
IP_102433.1	MS	SCN5A	ATGATGAAAACAGCACAGCGGGGGAGAGCGAGAGCCACCACACATCACTGCTGGTGCCCTGGCCCCTGCGCCGGACCAGTGCCCAGGGACAGCCCAGTCCCGGAACCTCGGCTCCTGGCCACGCCCTCCATGGCAAAAAGAACAGCACTGTGGACTGCAATGGGGTGGTCTCATTACTGGGGGCAGGCGACCCAGAGGCCACATCCCCAGGAAGCCACCTCCTCCGCCCTGTGA	CDS
IP_102439.1	RP	SCN5A	ATGAGAAGATGGCAAACTTCCTATTACCTCGGGGCACCAGCAGCTTCCGCAGGTTCACACGGGAGTCCCTGGCAGCCATCGAGAAGCGCATGGCAGAGAAGCAAGCCCGCGGCTCAACCACCTTGCAGGAGAGCCGAGAGGGGCTGCCCGAGGAGGAGGCTCCCCGGCCCCAGCTGGACCTGCAGGCCTCCAAAAAGCTGCCAGATCTCTATGGCAATCCACCCCAAGAGCTCATCGGAGAGCCCCTGGAGGACCTGGACCCCTTCTATAGCACCCAAAAGACTTTCATCGTACTGA	5'UTR
IP_102644.1	RP	RPL14	ATGTCCGACAAGCCTGGCAGAAGGCAGACATCAATACAAAATGGGCAGCCACACGATGGGCCAAGAAGATTGAAGCCAGAGAAAGGAAAGCCAAGATGA	CDS
IP_102706.1	RP	CTNNB1	ATGAAGGTGTGGCGACATATGCAGCTGCTGTTTTGTTCCGAATGTCTGAGGACAAGCCACAAGATTACAAGAAACGGCTTTCAGTTGAGCTGA	CDS
IP_102708.1	RP	CTNNB1	ATGAGACTGCTGATCTTGGACTTGATATTGGTGCCCAGGGAGAACCCCTTGGATATCGCCAGGATGATCCTAGCTATCGTTCTTTTCACTCTGGTGGATATGGCCAGGATGCCTTGGGTATGGACCCCATGA	CDS
IP_103023.1	RP	ABHD5	ATGCTTTTGACCTATTGGGTTTTGGACGAAGTAGTAGACCCAGGTTTGACAGTGATGCAGAAGAAGTGGAGAATCAGTTTGTGGAATCCATTGAAGAGTGGAGATGTGCCCTAG	CDS
IP_103200.1	RP	KIF15	ATGGAAAACAGAGACATGTTTGCTACAGAGACTCCAAACTTACCTTCTTACTACGGGATTCCCTTGGAGGTAATGCCAAAACAGCCATAA	CDS
IP_103356.1	MS	SACM1L	ATGTGCTCTTCTGGGGAGTTGCAAGCATTGGAACATTTTTTATCATTCTTTACAATGGCAAAGATTTTGTCGATGCTCCCAGACTGGTCCAGAAAGAAAAGATAG	CDS
IP_103514.1	MS	LRRC2	ATGCTCCCAAAATGGGACATAAAGTGGTTGTCTTCGACATTTCTGTCATCAGAGCCTTGTGGGAAACTCGTGTCAAGAAGCACAAAGCTTGGCAGAAGAAGGAGGTGGAAAGGCTTGAGAAGAGCGCCTTGGAGAAGATAA	5'UTR
IP_103659.1	RP	SETD2	ATGAAGCAATTAAAAGATGTTGTTCTCCCCCTAATGAACTGGGATTCCGACGAGGGTCATCATATTCTAAGCATGACAGTAGTGCTTCCCGTTATAAATCTACCCTTTCAAAACCTATACCCAAGTCTGATAAATTTAAAAATTCTTTCTGTTGTACAGAATTAA	CDS
IP_103661.1	MS	SETD2	ATGACTCTCTTGGTTATAATGCCCCGCATCATCCCTTTGCTGGTTACCCACCAGGTTATCCCATGCAGGCCTATGTGGATCCCAGCAACCCTAATGCTGGAAAGGTGCTCCTGCCCACACCCAGCATGGACCCAGTGTGTTCTCCTGCTCCTTATGATCATGCTCAGCCCTTGGTGGGACATTCTACAGAACCCCTTTCTGCCCCTCCACCAGTACCAGTGGTGCCACATGTGGCAGCTCCTGTGGAAGTTTCCAGTTCCCAGTATGTGGCCCAGAGTGATGGTGTAG	CDS
IP_103686.1	MS	KIF9	ATGGGAAGGACTTGGATTACGTTTCCACCTCCAAGACCCAGCTGGTCCCATCCTCCAAAGATGGGGATGTCAAAGACATGCTTTCGCGGGACCGGGAAACTTCCAGCATTGAGCCCCTTCCCTCAGACTCCCCGAAGGAGGAATTACGCCCAATTAGGCCCGACACCCCACCCTCCAAACCAGTGGCCTTTGAGGAGTTTAAGAATGAGCAAGGTAGTGAGATCAACCGAATTTTCAAAGAAAACAAATCCATCTTGA	CDS
IP_103741.1	RP	SCAP	ATGGATGCCTGCTGCTGTCCCCTGGGAACTTCTGGCAGAATGACTGGGAACGCTTCCATGCTGATCCTGACATCATTGGGACCATCCACCAGCACGAGCCTAAAACCCTGCAGACTTCAGCCACACTCAAAGACTTGTTATTTGGTGTTCCTGGGAAGTACAGCGGGGTGA	CDS
IP_103784.1	RP	SMARCC1	ATGCTGAATTACGAGCACGACAGCAAATGGAACAGCAGCAGCATGGCCAGAACCCTCAACAGGCACACCAGCACTCAGGAGGACCTGGCCTGGCCCCACTTGGAGCAGCAGGGCACCCTGGCATGA	CDS
IP_103787.1	RP	SMARCC1	ATGAAGAGCCAGTCAGAAGTCCAGAAAGAAGAGATAGAAAAGCATCAGCTAATGCTCGAAAGAGGAAACATTCGCCTTCGCCTCCCCCTCCGACACCAACAGAATCACGGAAGAAGAGTGGGAAGAAAGGCCAAGCTAGCCTTTATGGGAAGCGCAGAAGTCAGAAAGAGGAAGATGAGCAAGAAGATCTAA	CDS
IP_103789.1	RP	SMARCC1	ATGGGGGCCCGGCCACCAAGTTTTGGGAGAGCCCGGAGACGGTGTCCCAGCTGGATTCGGTGCGGGTCTGGCTGGGCAAGCACTACAAGAAGTATGTTCATGCGGATGCTCCTACCAATAAAACACTGGCTGGGCTGGTGGTGCAGCTTCTTCAGTTCCAGGAAGATGCCTTTGGGAAGCATGTCACCAACCCGGCCTTCACCAAACTCCCTGCAAAGTGTTTCATGGATTTCAAAGCTGGAGGCGCCTTATGTCACATTCTTGGGGCTGCTTACAAGTATAAAAATGAACAGGGATGGCGGAGGTTTGACCTACAGAACCCATCTCGAATGGATCGTAATGTGGAAATGTTTATGA	CDS
IP_103790.1	RP	SMARCC1	ATGAGCAGGATGAAGAAACAGTCACAGCAGGAGGAAAGGAAGATGAAGATCCTGCCAAAGGTGATCAGAGTCGATCAGTTGACCTTGGGGAAGATAATGTGA	CDS
IP_103810.1	RP	MAP4	ATGACATCACCACCCCACCGAACAAGGAGCTCCCACCAAGCCCAGAGAAGAAAACAAAGCCTTTGGCCACCACTCAACCTGCAAAGACTTCAACATCGAAAGCCAAAACACAGCCCACTTCTCTCCCTAAGCAGCCAGCTCCCACCACCATTGGTGGGTTGA	CDS
IP_104240.1	RP	IMPDH2	ATGCCATGGACAAGCACCTCAGCAGCCAGAACAGATATTTCAGTGAAGCTGACAAAATCAAAGTGGCCCAGGGAGTGTCTGGTGCTGTGCAGGACAAAGGGTCAATCCACAAATTTGTCCCTTACCTGA	CDS
IP_104241.1	RP	IMPDH2	ATGAACAGGGATTCATCACAGACCCTGTGGTCCTCAGCCCCAAGGATCGCGTGCGGGATGTTTTTGAGGCCAAGGCCCGGCATGGTTTCTGCGGTATCCCAATCACAGACACAGGCCGGATGGGGAGCCGCTTGGTGGGCATCATCTCCTCCAGGGACATTGATTTTCTCAAAGAGGAGGAACATGACTGTTTCTTGGAAGAGATAA	CDS
IP_104299.1	MS	LAMB2	ATGGTGGTCAGTGCCTGTGCAAGCCTGGAGTGGTTGGGCGCCGCTGTGACCTCTGTGCCCCTGGCTACTATGGCTTTGGCCCCACAGGCTGTCAAGCCTGCCAGTGCAGCCACGAGGGGGCACTCAGCAGTCTCTGTGAAAAGACCAGTGGGCAATGTCTCTGTCGAACTGGTGCCTTTGGGCTTCGCTGTGACCGCTGCCAGCGTGGCCAGTGGGGATTCCCTAGCTGCCGGCCATGTGTCTGCAATGGGCATGCAGATGAGTGCAACACCCACACAGGCGCTTGCCTGGGCTGCCGTGATCACACAGGGGGTGAGCACTGTGAAAGGTGCATTGCTGGTTTCCACGGGGACCCACGGCTGCCATATGGGGGCCAGTGCCGGCCCTGTCCCTGTCCTG…	CDS
IP_104368.1	RP	USP4	ATGACATTTTCGTGTACGAGGTCTGCAGCACTTCCGTGGATGGCTCGGAATGTGTCACGCTTCCAGTCTACTTCAGGGAGAGGAAGTCCAGGCCATCAAGCACTTCCTCCGCATCAGCGCTATATGGGCAGCCACTATTGCTTTCTGTCCCCAAGCACAAGTTAA	CDS
IP_104484.1	RP	APEH	ATGAAGACTGGGGAGAAAACATGGTTTCCAAAAGCATCCCTGTGCTCTGCGTGCTGGATGTCGAGAGTGGCAACATCTCTGTGCTTGAGGGGGTCCCTGAGAATGTGTCCCCTGGACAGGCATTTTGGGCCCCTGGAGATGCTGGTGTGGTGTTTGTGGGCTGGTGGCATGAGCCCTTCCGGTTGGGCATCCGCTTTTGCACCAATCGCAGGTCAGCCCTGTATTATGTGGACCTCATCGGGGGGAAGTGTGAGCTCCTCTCGGATGACTCCCTGGCTGTCTCTTCTCCCCGGCTGA	CDS
IP_104523.1	RP	GMPPB	ATGGTGTGTGTATCCGGCGGTGCACGGTGCTGCGGGATGCCCGGATCCGTTCCCATTCCTGGCTTGAGTCCTGCATTGTGGGCTGGCGCTGCCGCGTGGGTCAGTGGGTACGCATGGAGAACGTGA	CDS
IP_104537.1	RP	IP6K1	ATGTGGAAAGTGAGACTGTGGAACAGGATGACACAACAGAACGGGAGCAACCTCGGCGCAAACACTCCCGCCGGAGCCTGCACCGGTCAGGCAGTGGCAGTGACCACAAGGAGGAGAAAGCCAGCCTGTCCCTTGAGACCTCTGAGAGCTCACAGGAGGCAAAGAGTCCGAAGGTGGAGCTGCACAGCCACTCAGAGGTCCCTTTCCAGATGCTAG	5'UTR
IP_104543.1	RP	IP6K1	ATGTGCTGCATCCTCTGCCCTCAGTGTGCAACTGGCCCCCAACGCAATGTGTGTTTGTCAAACCATGGAAGTGGGGCAGTATGGCAAGAATGCAAGTCGGGCTGGAGACCGGGGAGTCCTCCTGGAGCCCTTCATCCACCAAGTAGGCGGACACAGCAGCATGATGCGTTACGACGATCACACTGTGTGCAAGCCCCTCATCTCCCGGGAACAGCGCTTTTACGAGTCCCTCCCTCCCGAAATGAAGGAGTTCACCCCTGA	5'UTR
IP_104559.1	RP	UBA7	ATGCCCTGGACGCTTCGAAGCTACTGGATGAGGAGCTGTATTCAAGACAGCTGTATGTGCTGGGCTCACCTGCCATGCAGAGGATTCAGGGAGCCAGGGTCCTGGTGTCAGGCCTGCAGGGCCTGGGGGCCGAGGTGGCCAAGAACTTGGTTCTGA	CDS
IP_104564.1	RP	UBA7	ATGGAACTCCCTTCTGGTCAGGTCCCAAACAGTGTCCCCAGCCCTTGGAGTTTGACACCAACCAAGACACACACCTCCTCTACGTACTGGCAGCTGCCAACCTGTATGCCCAGATGCATGGGCTGCCTGGCTCACAGGACTGGACTGCACTCAGGGAGCTGCTGA	CDS
IP_104575.1	MS	CAMKV	ATGGACGCCCTGTGGACTGCTGGGCCATTGGAGTCATCATGTACATCCTGCTTTCAGGCAATCCACCTTTCTATGAGGAGGTGGAAGAAGATGATTATGAGAACCATGATAAGAATCTCTTCCGCAAGATCCTGGCTGGTGACTATGAGTTTGACTCTCCATATTGGGATGATATTTCGCAGGCAGCCAAAGACCTGGTCACAAGGCTGA	CDS
IP_104638.1	RP	RBM5	ATGGGGAAAAAGAGACCTACGTGCCAGCTGCAGAGTCTAGCTCCCACCAGCAGTCGGGCCTGCCTCCTGCAAAAGAGGGGAAAGAGAAGAAGGAGAAACCCAAGAGCAAAACAGCCCAGCAGATTGCCAAAGACATGGAACGCTGGGCTAAGAGTTTGA	CDS
IP_104643.1	RP	RBM5	ATGACCGTGATGAGCGTGAATCCCGAAGCAGGCGGAGGGACTCAGATTACAAAAGATCTAGTGATGATCGGAGGGGTGATAGATATGATGACTACCGAGACTATGACAGTCCAGAGAGAGAGCGTGAAAGAAGGAACAGTGACCGATCCGAAGATGGCTACCATTCAGATGGTGACTATGGTGAGCACGACTATAGGCATGACATCAGTGACGAGAGGGAGAGCAAGACCATCATGCTGCGCGGCCTTCCCATCACCATCACAGAGAGCGATATTCGAGAAATGA	CDS
IP_104729.1	RP	IFRD2	ATGGTGGCGCGCGTGGCGTGTGGCTCCCGTCGTCTGGCCAAGTCTCAGCGCAGCGCACCGGCCGGCGTCTCGTTGGCCTGGAGCCCACACCCACCGGGTCCCTGA	CDS
IP_104946.1	RP	VPRBP	ATGTGGACTCCAAAGCTGAGCTCACTACCCTGCTGGAGCAGTGGGAAAAGGAACATGGCAGTGGGCAGGACATGGTACCTATCCTTACCAGGATGTCTCAATTGA	CDS
IP_105020.1	MS and RP	PARP3	ATGCAAAGAAGGACTTTGAGAAGAAATTTCGGGAAAAGACCAAGAACAACTGGGCAGAGCGGGACCACTTTGTGTCTCACCCGGGCAAGTACACACTTATCGAAGTACAGGCAGAGGATGAGGCCCAGGAAGCTGTGGTGA	CDS
IP_105080.1	RP	ACY1	ATGCCTTCACTGTCTTTTATAGTGAGCGGAGTCCCTGGTGGGTGCGGGTTACCAGCACTGGGAGGCCAGGCCATGCCTCACGCTTCATGGAGGACACAGCAGCAGAGAAGCTGCACAAGGTTGTAA	CDS
IP_105100.1	RP	POC1A	ATGACAAGACTGTTAAGCTGTGGGACAAGAGCAGCCGGGAATGTGTCCACTCGTATTGTGAGCATGGCGGCTTTGTCACCTATGTGGACTTCCACCCCAGTGGGACGTGCATTGCCGCTGCCGGCATGGACAACACAGTGA	CDS
IP_105150.1	RP	WDR82	ATGACTGCCAGGAGGGCAAACCAAAGAGAACCCTGTACAGTAAGAAATATGGTGTGGACCTCATCAGATACACTCATGCAGCAAACACAGTTGTTTACAGCTCTAACAAAATAG	CDS
IP_105331.1	MS	PBRM1	ATGAACTCTGCAAAAATGGAGAGATTCTTCTTTCACCGGCACTCAGCTATACCACAAAACATTTGCATAATGATGTGGAGAAAGAGAGAAAGGAAAAATTGCCAAAAGAAATAG	CDS
IP_105343.1	RP	PBRM1	ATGATGATATTGAAGAGATGGGAGAAGAAGATAGTGAGGTCATTGAACCTCCTTCTCTACCTCAGCTTCAGACCCCCCTGGCCAGTGAGCTGGACCTCATGCCCTACACACCCCCACAGTCTACCCCAAAGTCTGCCAAAGGCAGTGCAAAGAAGGAAGGCTCCAAACGGAAAATCAACATGA	CDS
IP_105344.1	RP	PBRM1	ATGAAGAGCGGGCAGCTAAAGTTGCTGAGCAGCAGGAGAGAGAGCGAGCAGCACAGCAACAGCAGCCGAGTGCTTCTCCCCGAGCAGGCACCCCTGTGGGGGCTCTCATGGGGGTGGTGCCACCACCAACACCAATGGGGATGCTCAATCAGCAGTTGA	CDS
IP_105508.1	RP	DCP1A	ATGAGTATGAGAGGAATCAGATGGGTGACTCAAATATCTCCAGCCCTGGGTTACAGCCAAGCACTCAGCTCTCCAATCTGGGAAGCACCGAGACTCTAG	CDS
IP_105547.1	MS and RP	CHDH	ATGTGGTGGTGGGCGCGGGCTCGGCGGGCTGCGTGCTGGCTGGGAGGCTCACGGAGGACCCCGCCGAGCGCGTGCTGCTGCTGGAGGCCGGGCCCAAGGACGTGCTCGCGGGGAGCAAGCGGCTCTCGTGGAAGATCCACATGCCCGCGGCCCTGGTGGCCAACCTGTGCGACGACAGGTACAACTGGTGCTACCACACAGAGGTGCAGCGGGGCCTGGACGGCCGCGTGCTGTACTGGCCACGCGGCCGCGTCTGGGGTGGCTCCTCATCCCTCAATGCCATGGTCTACGTCCGTGGGCACGCCGAGGACTACGAGCGCTGGCAGCGCCAGGGCGCCCGCGGCTGGGACTACGCGCACTGCCTGCCCTACTTCCGCAAGGCGCAGGGCCACGAGCTGG…	CDS
IP_105574.1	RP	ACTR8	ATGAACAAAGACAAAATGGCCTTAAAATGGTGGATCAAGCAATATGGTCTAAAAAGATGTCCAATGGTACAAGACGCATTCCTGTGTCCCCTGAACAGGCACGCTCCTACAATAAGCAGATGCGACCTGCAATTTTAG	CDS
IP_105587.1	RP	SELK	ATGGAAACTCATCTGATTCCAGATATGATGATGGAAGAGGGCCACCAGGAAACCCTCCCCGAAGAATGGGTAGAATCAATCATCTGCGTGGCCCTAGTCCCCCTCCAATGGCTGGTGGATGAGGAAGGTAAATGTCTGCTCTAA	CDS
IP_105659.1	RP	FAM208A	ATGATAAAAAATTCTTATACTCAGCTCCCAGAAATAAATCCCATATTGATACTTGTTTGCATGCCTATATTTTTCGGCCTGAAGTGTATCAGTTACCTATTTGTAAATTAA	CDS
IP_105766.1	MS	DNAH12	ATGAGGACTACATTGAATTCATTAAGAAACTTCCATTTACTCAACACCCTGAGATATTTGGATTACATGAAAACGTTGACATCTCCAAGGATCTTCAACAAACAAAAACCCTCTTTGAGTCCTTGCTCCTCACCCAGGGAGGCTCCAAACAGACAGGAGCCTCAGGAAGTACTGATCAGATTCTGTTAG	CDS
IP_105780.1	RP	PDE12	ATGTTTCATGTGATCTGTATCCTGGCATACCAGTTATATTTTGTGGGGACTTTAATAGTACACCATCAACAGGAATGTATCATTTTGTCATCAATGGCAGCATTCCAGAGGATCATGAAGACTGGGCTTCCAATGGGGAGGAGGAAAGATGCAATATGTCTCTTACACATTTCTTCAAGCTGA	CDS
IP_105782.1	RP	PDE12	ATGCCTGGCAAGACGGCGCGGTGCTGCAGATCGGCGATGTTAAGTACAAGGTGGAGCGCAACCCGCCCGCCTTCACCGAACTGCAGTTGCCGCGCTACATCATGGCCGGGTTCCCTGTGTGCCCCAAACTCAGCCTCGAATTTGGGGATCCCGCCAGCTCCCTTTTCCGCTGGTATAAGGAAGCCAAGCCCGGAGCGGCGGAGCCCGAGGTCGGTGTCCCCTCGTCATTGTCTCCCTCCTCACCTTCTTCTTCTTGGACTGAGACTGATGTGGAGGAGCGTGTCTACACCCCGTCCAATGCCGACATCGGGCTAA	CDS
IP_105817.1	MS	SLMAP	ATGAGAGCGTTCCTTGAGTCCGTACACCGTCCTCCCTCTAGAAGCTGGCATCACACTCATGCTGGGGACAAACAGAACCATTTTCTTCCTCTTTACCTCTTAAAACAGCAGAAGTACAAGAATACAGCTGTAGGGTCATTGCTTTAA	3'UTR
IP_105852.1	RP	FLNB	ATGAAGGGGATGATGATGCCAAGAAGCAGACGCCAAAGCAGAGGCTGCTGGGGTGGATTCAGAACAAGATCCCCTACTTGCCCATCACCAACTTTAACCAGAACTGGCAAGACGGCAAAGCCCTGGGAGCCCTGGTAG	CDS
IP_105865.1	RP	FLNB	ATGAGGAAGACGTGGATTTTGACATTATTCACAATGCCAATGATACGTTCACAGTCAAATATGTGCCTCCTGCTGCTGGGCGATACACTATCAAAGTTCTCTTTGCATCTCAGGAAATCCCCGCCAGCCCTTTCAGAGTCAAAGTTGACCCTTCCCACGATGCCAGCAAAGTGA	CDS
IP_105928.1	RP	PDHB	ATGAGGAGCTGGAAAGAGATGAGAAGGTATTTCTGCTTGGAGAAGAAGTTGCCCAGTATGATGGGGCATACAAGGTTAGTCGAGGGCTGTGGAAGAAATATGGAGACAAGAGGATTATTGACACTCCCATATCAGAGATGGGCTTTGCTGGAATTGCTGTAG	CDS
IP_106104.1	RP	PSMD6	ATGCCGTTACTCTGTTTTCTTCCAATCATTAGCGGTTGTGGAACAGGAAATGAAAAAGGACTGGCTTTTTGCCCCTCATTATCGATACTATGTAAGAGAAATGAGAATTCATGCATACAGTCAGCTGCTGGAATCATATAG	CDS
IP_106235.1	RP	KBTBD8	ATGCTGTGGAGTACAAAGAGAAGATCTATGTTTTACAGGGAGAATTTTTTCTCTTCTATGAGCCTCAAAAAGACTACTGGGGTTTCTTAA	CDS
IP_106245.1	RP	SUCLG2	ATGACAACGCAGAATTCCGACAAAAAGACATATTTGCTATGGACGACAAATCAGAGAATGAGCCCATTGAAAATGAAGCTGCCAAATATGATCTAA	CDS
IP_106284.1	RP	TMF1	ATGAATCTGAAAATTTCTTCAGTGCCTTTCTCTCGCCAACTGATGTCCAGACCATTCAGAAGAGTCCAGTGGTATCAAAACCTCCAGCAAAATCACAACGACCAGAAGAAGAAGTGA	CDS
IP_106287.1	RP	UBA3	ATGGGCTGTATACATACACATTTGAAGCAGAAAGAAAGGAAAACTGCCCAGCTTGTAGCCAGCTTCCTCAAAATATTCAGTTTTCTCCATCAGCTAAACTACAGGAGGTTTTGGATTATCTAA	CDS
IP_106292.1	RP	ARL6IP5	ATGGAACAACCGCGTAGTGAGCAACCTGCTCTATTACCAGACCAACTACCTGGTGGTGGCTGCCATGATGATTTCCATTGTGGGGTTTCTGAGTCCCTTCAACATGATCCTGGGAGGAATCGTGGTGGTGCTGGTGTTCACAGGGTTTGTGTGGGCAGCCCACAATAA	CDS
IP_106438.1	RP	SHQ1	ATGGAAGTGAGCAAGGGTCCTATGATGCAGATAAAGGAATTTTTACCATTCGCCTGCCCAAAGAAACCCCTGGCCAGCATTTTGAGGGGCTGA	CDS
IP_106569.1	RP	GBE1	ATGAAGGTGGTATTGATAAGTTTTCCAGAGGCTATGAATCATTTGGCGTCCACAGATGTGCTGATGGTGGTTTATACTGCAAAGAATGGGCCCCGGGAGCAGAAGGAGTTTTTCTTACTGGAGATTTTAATGGTTGGAATCCATTTTCGTACCCATACAAAAAACTGGATTATGGAAAATGGGAGCTGTATATCCCACCAAAGCAGAATAAATCTGTACTCGTGCCTCATGGATCCAAATTAA	CDS
IP_106570.1	RP	GBE1	ATGCAGCGGAATATGGAGGGCATCAGAGACTGGACCACAGCACTGACTTTTTTTCTGAGGCTTTTGAACATAATGGGCGTCCCTATTCTCTTTTGGTGTACATTCCAAGCAGAGTGGCCCTCATCCTTCAGAATGTGGATCTGCCGAATTGAAGAGGCCTGA	CDS
IP_106847.1	RP	CLDND1	ATGGTCCTTCTGCCTGGCTTGTGTCTCTGCTCCCTTACAGTTCATGGCTTCTGCTCTCTTCATCTGGGCTGCTCACACCAACCGGAAAGAGTACACCTTAATGAAGGCATATCGTGTGGCATGAGCAAGAAACTGCCTGCTTTACAATTGCCATTTTTATTTTTTTAA	CDS
IP_106853.1	RP	CLDND1	ATGAATTCATTAGTGATGAGGCAGATGAAAAGACTTATAATGATGCACTTTTTCGATACAATGGCACAGTGGGATTGTGGAGACGGTGTATCACCATACCCAAAAACATGCATTGGTATAGCCCACCAGAAAGGACAGAGTCATTTGATGTGGTCACAAAATGTGTGA	CDS
IP_106892.1	MS	DCBLD2	ATGTGTCTGCCTACAGAATCCTGTACAGTGATGATGGGCAGAAATGGACTGTGTACAGAGAGCCTGGTGTGGAGCAAGATAAGATATTTCAAGGAAACAAAGATTATCACCAGGATGTGCGTAATAACTTTTTGCCACCAATTATTGCACGTTTTATTAGAGTGA	CDS
IP_106936.1	RP	TOMM70A	ATGCTGAAGGCAAATACATGGCAGAAGCATTGCTACTACGAGCTACCTTCTACCTGCTTATTGGCAATGCCAATGCAGCCAAACCAGATTTAG	CDS
IP_106941.1	RP	TOMM70A	ATGAAATGTATGATAAATGTATTGATTTGGAACCAGATAATGCTACAACATATGTTCATAAAGGTTTACTTCAACTTCAGTGGAAGCAAGATCTGGATAGAGGTTTGGAACTTATCAGCAAGGCTATTGAAATTGACAATAAATGTGATTTTGCCTATGAAACCATGGGAACTATTGAAGTACAAAGAGGAAACATGGAGAAAGCCATTGACATGTTCAACAAAGCTATTAACCTGGCCAAATCGGAAATGGAGATGGCCCATCTGTATTCACTTTGCGATGCCGCCCATGCCCAGACAGAAGTTGCAAAGAAATACGGATTAA	CDS
IP_107098.1	RP	PCNP	ATGGAGGGGAAAGTTCCAGTCGCAGCGCTGAGAAGCGATCAGCTGAAGAAGAAGCTGCCGACCTCCCAACAAAGCCTACAAAGATCTCCAAGTTTGGATTTGCCATAG	CDS
IP_107099.1	RP	ZBTB11	ATGATGATACTTATAGAAGCAGGCTTCGACAACGTTCTGTTAATGAAGGGGCATATATTCGACTACACAAGGGAATGGAGAAAAAGCTGCAGAAACGGAAAGCCGTTCCCAAGTCAGCAGTTCAACAGGTGGCTCAGAAGTTAG	CDS
IP_107100.1	RP	ZBTB11	ATGCGCCGGGCACCGAGGGCAATGTCAAGCGTAAAATCCGAAAAGCTGCCGCCTGCTACGTGGTGCGCGGCGGGACTCTGTATTACCAGCGGCGGCAGCGGCACCGCAAGACCTTCGCGGAGCTGGAGGTGGTGCTGCAGCCGGAGCGACGCCGGGACCTCATCGAGGCGGCGCACCTGGGTCCCGGCGGCACTCACCACACCCGGCATCAGACCTGGCACTACTTGTCCAAGACGTACTGGTGGCGAGGTATATTGA	CDS
IP_107183.1	MS and RP	ALCAM	ATGGAGATACCATTATCATACCTTGCCGACTTGACGTACCTCAGAATCTCATGTTTGGCAAATGGAAATATGAAAAGCCCGATGGCTCCCCAGTATTTATTGCCTTCAGATCCTCTACAAAGAAAAGTGTGCAGTACGACGATGTACCAGAATACAAAGACAGATTGA	CDS
IP_107203.1	RP	CBLB	ATGAAGAACAGTCACAGGACAGACGAAATCTCACAAAACTGTCCCTTATCTTCAGTCACATGCTGGCAGAAATCAAAGCAATCTTTCCCAATGGTCAATTCCAGGGAGATAACTTTCGTATCACAAAAGCAGATGCTGCTGAATTCTGGAGAAAGTTTTTTGGAGACAAAACTATCGTACCATGGAAAGTATTCAGACAGTGCCTTCATGAGGTCCACCAGATTAGCTCTGGCCTGGAAGCAATGGCTCTAA	CDS
IP_107206.1	RP	CBLB	ATGGCAGAAACCCTGGTGGTCGAGGAGGAAATCCCCGAAAAGGTCGAATTTTGGGTATTATTGATGCTATTCAGGATGCAGTTGGACCCCCTAAGCAAGCTGCCGCAGATCGCAGGACCGTGGAGAAGACTTGGAAGCTCATGGACAAAGTGGTAA	CDS
IP_107522.1	RP	ATG3	ATGCTGGCGGTGAAGATGCTATTTTGCAAACCAGAACTTATGACCTTTACATCACTTATGATAAATATTACCAGACTCCACGATTATGGTTGTTTGGCTATGATGAGCAACGGCAGCCTTTAA	CDS
IP_107713.1	RP	NAA50	ATGCTCATGTGCTGCAGAAAAACCTCAAAGTTCCTTCTGGTCAGAATGCAGATGTGCAAAAGACAGACAACTGAACAAATTACAAATGAACTTTCTTGCACTTGCTTGTCGCCAAATAAAAGAGAGGCCCATTGA	CDS
IP_107724.1	RP	ATP6V1A	ATGAAGATAAAGAAAGCACATTTGGTTATGTGCATGGGGTCTCAGGACCTGTGGTTACAGCCTGTGACATGGCGGGTGCAGCCATGTATGAGCTGGTGA	CDS
IP_107915.1	MS	GAP43	ATGATGACGACCAAAAGATTGAACAAGATGGTATCAAACCAGAAGATAAAGCTCATAAGGCCGCAACCAAAATTCAGGCTAGCTTCCGTGGACACATAA	CDS
IP_108003.1	MS	ARHGAP31	ATGAGCTCTATGAGAAATTCACGGAGGCAGTGTCGCATTGCCCTGAAGAAGGCCAACTGGCCCGAATCCAAAATGTTATCCAGGAGCTTCCTCCATCCCACTATAGGACCTTGGAATACCTGA	CDS
IP_108044.1	RP	TIMMDC1	ATGAACAGCAGAGAATTTCAAAGGACCTTGCTAATATCTGTAAGACGGCAGCTACAGCAGGCATCATTGGCTGGGTGTATGGGGGAATACCAGCTTTTATTCATGCTAAACAACAATACATTGAGCAGAGCCAGGCAGAAATTTATCATAACCGGTTTGATGCTGTGCAATCTGCACATCGTGCTGCCACACGAGGCTTCATTCGTTATGGCTGGCGCTGGGGTTGGAGAACTGCAGTGTTTGTGA	CDS
IP_108054.1	RP	ADPRH	ATGCTGTTCTTGCTGCAGGAGACTCCTGGAAGGAGCTTGCCCACCGAGCCTTTTTCCATGGTGGAGACAGTGATTCTACAGCTGCCATTGCTGGCTGCTGGTGGGGAGTTATGTATGGTTTTAAAGGAGTGA	CDS
IP_108168.1	RP	FSTL1	ATGTGTTTTGTGGAGCCGGCCGGGAATGTGCAGTCACAGAGAAAGGGGAACCCACCTGTCTCTGCATTGAGCAATGCAAACCTCACAAGAGGCCTGTGTGTGGCAGTAATGGCAAGACCTACCTCAACCACTGTGAACTGCATCGAGATGCCTGCCTCACTGGATCCAAAATCCAGGTTGATTACGATGGACACTGCAAAGAGAAGAAATCCGTAA	CDS
IP_108170.1	RP	FSTL1	ATGAAACTGCCATCAATATTACAACGTATCCAGACCAGGAGAACAACAAGTTGCTTAGGGGACTCTGTGTTGATGCTCTCATTGAACTGTCTGATGAAAATGCTGATTGGAAACTCAGCTTCCAAGAGTTTCTCAAGTGCCTCAACCCATCTTTCAACCCTCCTGAGAAGAAGTGTGCCCTGGAGGATGAAACGTATGCAGATGGAGCTGAGACCGAGGTGGACTGTAACCGCTGTGTCTGTGCCTGTGGAAATTGGGTCTGTACAGCCATGA	CDS
IP_108199.1	RP	RABL3	ATGGGATGTTGGAGGCTCTGTGGGCAGTGCCAGCAGCGTGAAAAGCACAAGAGCAGTATTCTACAACTCCGTAAATGGTATTATTTTCGTACACGACTTAACAAATAA	CDS
IP_108205.1	RP	GTF2E1	ATGAATCAGCAATGCCCAAAAAAGATGCACGCACACTTTTGGCAAGGTTTAATGAACAAATTGAGCCCATTTATGCATTGCTTCGGGAGACAGAGGATGTGA	CDS
IP_108410.1	RP	KPNA1	ATGTGCTTTCCTGGTTGCTGTTTGTCAGTGACACTGATGTACTGGCTGATGCCTGCTGGGCCCTCTCATATCTATCAGATGGACCCAATGATAAAATTCAAGCGGTCATCGATGCGGGAGTATGTAGGAGACTTGTGGAACTGCTGA	CDS
IP_108413.1	RP	KPNA1	ATGAGATGCGCAGGAGGAGGGAGGAAGAAGGACTGCAGTTACGAAAGCAGAAAAGAGAAGAGCAGTTATTCAAGCGGAGAAATGTTGCTACAGCAGAAGAAGAAACAGAAGAAGAAGTTATGTCAGATGGAGGCTTTCATGAGGCTCAGATTAGTAACATGGAGATGGCACCAGGTGGTGTCATCACTTCTGACATGA	CDS
IP_108414.1	RP	KPNA1	ATGCCAACATTTTCCCAGCCCTCATTAGTATTTTACAAACTGCTGAATTTCGGACAAGAAAAGAAGCAGCTTGGGCCATCACAAATGCAACTTCTGGAGGATCAGCTGAACAGATCAAGTACCTAG	CDS
IP_108433.1	RP	PARP9	ATGGTCATGACAGTGTGGTTGACAATGTCTCCAGCCCTGAAACCTTTGTTATTTTTAGTGGCATGCAGGCTATACCTCAGTATTTGTGGACATGCACCCAGGAATATGTACAGTCACAAGATTACTCATCAGGACCAATGA	CDS
IP_108496.1	RP	PARP14	ATGAGAAGCAACTCTTCCATGGGACAGATGCCGGCTCCGTGCCACACGTCAATCGAAATGGCTTTAACCGCAGCTATGCCGGAAAGAATGCTGTGGCATATGGAAAGGGAACCTATTTTGCTGTCAATGCCAATTATTCTGCCAATGATACGTACTCCAGACCAGATGCAAATGGGAGAAAGCATGTGTATTATGTGCGAGTACTTACTGGAATCTATACACATGGAAATCATTCATTAA	CDS
IP_108498.1	RP	PARP14	ATGATGTCAAGAGTTCAGTTTCCTCTGTTTTGCAGGAGTGTGAAAAAAAAAATTACTCATCCATTTGCCTCCCAGCCATTGGGACAGGAAATGCCAAACAACACCCAGATAAGGTTGCTGAAGCCATAA	CDS
IP_108550.1	RP	PDIA5	ATGGAGAGAAATACGCAGTGCCTGTGCTCAGGACAAAGAAGAAGTTTCTCGAGTGGATGCAAAACCCTGAGGCCCCCCCGCCCCCAGAGCCCACGTGGGAAGAGCAGCAGACAAGCGTGTTGCACCTGGTGGGGGACAACTTCCGGGAGACCCTGA	CDS
IP_108557.1	RP	SEC22A	ATGGACTGCCACTTTCTGCTTCTACTGATTATGAACAAAGCACAGGAATGCAGGAGTGCAGAAAGTATTTTAAAATGCTTTCGAGGAAACTTGCTCAACTTCCTGATAGATGTACACTGA	CDS
IP_108589.1	RP	PTPLB	ATGGACGATCACGGAAATCATCCGTTACTCCTTTTATACATTCAGTCTATTAAACCATCTGCCTTACCTCATCAAATGGGCCAGGTACACACTTTTCATTGTGCTGTACCCAATGGGAGTGTCAGGAGAACTGCTCACAATATATGCAGCTCTGCCCTTTGTCAGACAAGCTGGCCTATATTCCATCAGTTTACCCAACAAATACAATTTCTCTTTTGA	CDS
IP_108786.1	RP	ZNF148	ATGTTGGATCAAGCTCCCAAGCATCCTCATCAGATAAAGCCAACATGTTGCAGGAATACTCCAAGTTTCTGCAGCAGGCTTTGGACAGAACTAGCCAAAATGATGCCTATTTGA	CDS
IP_108792.1	RP	ZNF148	ATGTGGAGATTAAGAGTAATCATGACAAAAATGTTATTCCAGATGAGGTACTGCAGACTCTGTTGGATCATTATTCCCACAAAGCTAATGGACAGCATGAGATATCCTTCAGTGTTGCAGATACTGAAGTGA	CDS
IP_108803.1	RP	SNX4	ATGGACTGCAGAGTGCTGGTCATCATATGGATGTGTATGCATCTTCTATTGATGATATTTTGGAAGATGAAGAACATTATGCAGATCAGTTAA	CDS
IP_109281.1	MS	RHO	ATGGCAGTTCTCCATGCTGGCCGCCTACATGTTTCTGCTGATCGTGCTGGGCTTCCCCATCAACTTCCTCACGCTCTACGTCACCGTCCAGCACAAGAAGCTGCGCACGCCTCTCAACTACATCCTGCTCAACCTAGCCGTGGCTGA	CDS
IP_109389.1	RP	ATP2C1	ATGGACTTCAACAAGACTACATCAGAAAAGCTGAATACCCTTTTAGCTCTGAGCAAAAGTGGATGGCTGTTAAGTGTGTACACCGAACACAGCAGGACAGACCAGAGATTTGTTTTATGA	CDS
IP_109391.1	RP	ATP2C1	ATGGCTGGAATGAGTTTGATATTAGTGAAGATGAGCCACTGTGGAAGAAGTATATTTCTCAGTTTAAAAATCCCCTTATTATGCTGCTTCTGGCTTCTGCAGTCATCAGTGTTTTAA	CDS
IP_109392.1	RP	ATP2C1	ATGGAGATCTTGCATCGAGAAGTAACATTGCCTTTATGGGAACACTGGTCAGATGTGGCAAAGCAAAGGGTGTTGTCATTGGAACAGGAGAAAATTCTGAATTTGGGGAGGTTTTTAAAATGA	CDS
IP_109456.1	RP	MRPL3	ATGGTCAAACGAAAACCCACAGGAGACCTGGAGCTGTTGCAACTGGTGATATTGGCAGAGTCTGGCCTGGAACTAAAATGCCTGGAAAAATGGGAAACATATACAGGACAGAATATGGACTGA	CDS
IP_109483.1	RP	DNAJC13	ATGATGCTTATGAAGTGCTTAATCTGCCTCAAGGACAGGGACCGCATGATGAGAGCAAGATTAGGAAAGCTTACTTCAGACTTGCACAAAAGTACCACCCTGATAAGAATCCAGAAGGGAGGGACATGTTTGAAAAAGTAA	CDS
IP_109791.1	RP	MSL2	ATGTCGTGGCTGCCAAAACTCCTATATGGCCAATGGGGAGAAGAAGCTGGAGGCATTTGCCGTGCCAGAAAAGGCCTTGGAGCAGACCAGGCTCACTTTGGGCATTAA	CDS
IP_109803.1	RP	PCCB	ATGGAAGATTGGTTTATGTCTTCAGTCAGGATTTTACAGTTTTTGGAGGCAGTCTGTCAGGAGCACATGCCCAAAAGATCTGCAAAATCATGGACCAGGCCATAA	CDS
IP_110073.1	RP	MRPS22	ATGTGTTTACTGATATATCATATAGCATACCACACCGGGAGCGTTTTATTGTCGTCAGAGAACCAAGTGGCACACTACGCAAAGCCTCTTGGGAAGAACGGGACCGAATGA	CDS
IP_110081.1	MS and RP	COPB2	ATGTCGCTTTGGGCTATGATGAAGGGAGCATCATTGTTAAGCTTGGTCGGGAGGAACCTGCCATGTCCATGGATGCCAATGGAAAGATAA	CDS
IP_110083.1	RP	COPB2	ATGACCGTCTTGTTAAAATATGGGATTATCAGAATAAAACATGTGTGCAGACACTGGAAGGACATGCCCAAAATGTGTCTTGTGCCAGCTTTCATCCTGAGTTGCCAATCATTATCACAGGTTCAGAAGATGGAACAGTACGTATTTGGCATTCAAGCACCTACCGGCTTGAGAGCACACTGA	CDS
IP_110130.1	RP	SLC25A36	ATGTGGTGGTACAGTGGGAGCTATTCTGACATGTCCACTGGAAGTTGTAAAAACACGACTGCAGTCATCTTCTGTGACGCTTTATATTTCTGA	CDS
IP_110187.1	RP	ZBTB38	ATGAAGGAGATGTCCATTTTTCCAGGGAAGATGAAAATCAATCTTCTGATGTTCCCGGGCCGCCAGCCGCAGAGGTTCCACCTCTGGTGTACAATTGTAGCTGCTGTTCCAAAGCCTTTGACAGCAGCACTCTGCTCAGTGCCCACATGCAGCTTCACAAGCCAACCCAGGAGCCTTTAG	CDS
IP_110196.1	RP	ZBTB38	ATGCAAATGTTCACTCCTGGAGAAGAACATATCCTTGCCATTACTGCAACAAAGTATTTGCATTGGCTGAGTACAGGACAAGGCATGAAATTTGGCATACGGGAGAAAGACGATATCAGTGCATTTTCTGTCTTGAAACTTTCATGA	CDS
IP_110261.1	RP	TFDP2	ATGAAGTCGCTGATGAGCTGGTGTCAGAGTTCACCAATTCAAATAACCATTTGGCTGCTGATTCGGCTTATGATCAGAAGAACATTAGGCGAAGAGTTTATGATGCTTTAA	CDS
IP_110266.1	RP	TFDP2	ATGAAGTCGCTGATGAGCTGGTGTCAGAGTTCACCAATTCAAATAACCATTTGGCTGCTGATTCGCAGGCTTATGATCAGAAGAACATTAGGCGAAGAGTTTATGATGCTTTAA	CDS
IP_110331.1	MS	ATR	ATGCTGATAATAGCCGAGCTCAAGATTCAGCTGCCTATGCCATTCAGGAGTTGCTTTCTATTTATGACTGTAGAGAGATGGAGACCAACGGCCCAGGTCACCAATTGTGGAGGAGATTTCCTGAGCATGTTCGGGAAATACTAG	CDS
IP_110370.1	RP	U2SURP	ATGTTTTGTACAACTCTTCAGCCAAAGTTGCTAATGCTTCATATTATAGAAAATTTTTTGAAACAAAGTTATGTCAGATATTTTCAGACCTCAATGCCACCTATCGTACAATTCAAGGCCATTTACAATCTGAAAACTTTAAGCAACGGGTAA	CDS
IP_110371.1	RP	U2SURP	ATGGTCAGCGTCGTTCTATGGACGCGCCTTCAAGAAGAAATAGATCATCTGGTGTTCTTGATGATTACGCACCTGGCTCACATGATGTAG	CDS
IP_110376.1	MS	U2SURP	ATGCAGCTAAAGAAGAACATGAAACAGATGAAAAAAGAGGTAAAATCTATAAGCCATCTTCAAGATTTGCAGATCAAAAAAATCCTCCAAATCAGTCTTCCAATGAAAGACCACCATCTCTTCTTGTGA	CDS
IP_110377.1	RP	U2SURP	ATGTTCATTCATCTGGATCTTCAGATGCACATATGGATGCATCTGGACCCTCAGATAGTGATATGCCAAGTCGGACACGACCTAAGAGCCCAAGAAAACATAATTATAGGAATGAAAGTGCCCGTGAAAGCCTTTGTGATTCTCCTCATCAGAATCTCTCAAGACCTCTTCTGGAAAACAAACTTAAAGCATTCAGTATTGGAAAAATGA	CDS
IP_110520.1	RP	HLTF	ATGAAGGCAGAGCCACTATTGGAAGGTATTTTAATGAAGGGACTGTCCTGGCACATTATGCAGATGTCCTGGGTCTTTTGCTTAGACTGCGGCAAATTTGTTGCCATACTTACCTTCTTACAAATGCAGTGTCTTCCAATGGCCCCTCAGGAAATGATACACCTGAAGAACTGA	CDS
IP_110628.1	RP	PFN2	ATGGCTGCTGCCAGGAGGCCGCCATTGTCGGCTACTGCGACGCCAAATACGTCTGGGCAGCCACGGCCGGGGGCGTCTTTCAGAGCATTACGCCAATAG	CDS
IP_110685.1	RP	SIAH2	ATGCCGCCAGAAGTTGAGCTGCTGCCCGACGTGCAGGGGCGCCCTGACGCCCAGCATCAGGAACCTGGCTATGGAGAAGGTGGCCTCGGCAGTCCTGTTTCCCTGTAA	CDS
IP_110808.1	RP	MBNL1	ATGACAACACAGTCACTGTGTGTATGGATTACATCAAAGGGAGATGCTCTCGGGAAAAGTGCAAATACTTTCATCCCCCTGCACATTTGCAAGCCAAGATCAAGGCTGCCCAATACCAGGTCAACCAGGCTGCAGCTGCACAGGCTGCAGCCACCGCAGCTGCCATGGGAATTCCTCAAGCTGTACTTCCCCCATTACCAAAGAGGCCTGCTCTTGAAAAAACCAACGGTGCCACCGCAGTCTTTAACACTGGTATTTTCCAATACCAACAGGCTCTAG	CDS
IP_110809.1	RP	MBNL1	ATGCTCTCGGGAAAAGTGCAAATACTTTCATCCCCCTGCACATTTGCAAGCCAAGATCAAGGCTGCCCAATACCAGGTCAACCAGGCTGCAGCTGCACAGGCTGCAGCCACCGCAGCTGCCATGGGAATTCCTCAAGCTGTACTTCCCCCATTACCAAAGAGGCCTGCTCTTGA	CDS
IP_110881.1	RP	DHX36	ATGCGTTTGAGGGCTGGGAAGAGGCTAGGCGACGTGGTTTCAGATACGAAAAGGACTATTGCTGGGAATATTTTCTGTCTTCAAACACACTGCAGATGCTGCATAACATGA	CDS
IP_110935.1	RP	SLC33A1	ATGTGGGTTATGCTTCTACTTGCAATTCGGTGGGCCAAACAGCGGGTTACTTTTTGGGCAATGTTTTGTTTTTGGCCCTTGAATCTGCCGACTTTTGTAACAAATATTTGCGGTTTCAGCCTCAACCCAGAGGAATCGTTACTCTTTCAGATTTCCTTTTTTTCTGGGGAACTGTATTTTTAA	CDS
IP_110947.1	RP	GMPS	ATGGAGTTTTCAACATTAGTGTGGATAATACATGTTCATTATTCAGGGGCCTTCAGAAGGAAGAAGTTGTTTTGCTTACACATGGAGATAGTGTAG	CDS
IP_110949.1	RP	GMPS	ATGCTGCTCATTCTTTCTACAATGGAACAACAACCCTACCAATATCAGATGAAGATAGAACCCCACGGAAAAGAATTAGCAAAACGTTAA	CDS
IP_110969.1	RP	SSR3	ATGAAAGAATCTTGTGGAAGAAGAATGAAGTTGCTGATTATGAAGCTACAACATTTTCCATCTTCTATAACAACACTCTGTTCCTGGTCGTGGTCATTGTTGCTTCCTTCTTCATATTGA	CDS
IP_110978.1	RP	TIPARP	ATGGAATCTGCAAACACAACTTTGACCCTCGAGTCTGTGGAAAGCATGCTACAATGTTTGGACAAGGCAGTTATTTTGCAAAGAAGGCAAGCTACTCTCATAACTTTTCTAAGAAGTCCTCCAAAGGAGTCCACTTCATGTTTCTGGCCAAAGTGCTGA	CDS
IP_111003.1	RP	CCNL1	ATGGTCATAAAAGGAAAAAATCTCGTTCTCGATCTCAGAGCAAGTCTCGGGATCACTCAGATGCAGCCAAGAAACACAGGCATGAAAGGGGACATCATAGGGACAGGCGTGAACGATCTCGCTCCTTTGAGAGGTCCCATAAAAGCAAGCACCATGGTGGCAGTCGCTCAGGACATGGCAGGCACAGGCGCTGACTTTCTCTTCCTTTGA	CDS
IP_111158.1	MS	IFT80	ATGGAAAGTTTCTTTCTCATAAGAATGAAATCTTGGAAATTGCTCTGGATCAAAAAGGACTTACCAATGATAGAAAAATTGCTTTCATTGATAAAAATAGAGATCTCTGTATCACTTCTGTGA	CDS
IP_111232.1	RP	NMD3	ATGTCATCCCAAACAGCTAGAGGAGTTTATTGTGATGGAATGCAGCATAGTCCAAGATATAAAACGTGCTGCAGGTGCTGGAATGATATCAAAAAAGCATACCCTCGGGGAAGTCTGGGTACAGAAGACATCTGA	CDS
IP_111310.1	MS and RP	GOLIM4	ATGCTGAAGAGACCTATGGTGAAAATGATGAAAATACTGATGATAAAAATAATGATGGAGAAGAGCAAGAAGTTCGAGATGACAACCGCCCCAAAGGCCGAGAGGAACACTACGAGGAGGAAGAAGAGGAGGAAGAAGACGGGGCTGCAGTTGCTGAGAAATCACATCGAAGAGCTGAAATGTAGCGGCACCCAATTTCTAGACAACGCTCAGCCAACGGATTCTTTTCAAGCTGCTCAAACATAA	CDS
IP_111415.1	RP	SEC62	ATGAGAAGACAAAAAAAGAAAAAGAGAAAAAAAAAGATGGTGAAAAGGAAGAATCCAAAAAGGAGGAAACTCCAGGAACTCCTAAAAAGAAGGAAACTAAGAAAAAATTCAAACTTGAGCCACATGATGATCAGGTTTTTCTGGATGGAAATGAGGTGTATGTATGGATCTATGACCCAGTTCACTTTAAAACATTTGTCATGGGATTAA	CDS
IP_111448.1	RP	PHC3	ATGTGTGTGAAGAAGAAATGCCAGAAGAGTCAGATGAATGTGTCCGGATGGATAGAACCCCACCACCACCCACTTTGTCTCCAGCAGCTATAA	CDS
IP_111588.1	RP	PLD1	ATGGAAAAGAGTACCAAGCTGGCCGGTTTGCCCGAGGACTTCGGCTACAGTGCTTTAGGGTTGTCCTTGGCTATCTTGATGACCCAAGTGAGGACATTCAGGATCCAGTGA	CDS
IP_111750.1	RP	ZMAT3	ATGATTACTGTAAGCTCTGTGATGCCTCCTTCAGTTCCCCAGCTGTGGCTCAGGCTCACTATCAAGGGAAGAATCATGCCAAGAGGCTGCGGCTGGCGGAAGCTCAGAGTAACTCATTCTCGGAATCCTCAGAGCTGGGTCAACGGCGGGCCAGGAAAGAAGGGAATGAGTTTAAGATGA	CDS
IP_111922.1	RP	FXR1	ATGATCGAGACAGCCGACATCAGCGTGACAGCAGGAGACGCCCAGGAGGAAGAGGCAGAAGTGTTTCAGGGGGTCGAGGTCGTGGTGGACCACGTGGTGGCAAATCCTCCATCAGTTCTGTGCTCAAAGATCCAGACAGCAATCCATACAGCTTACTTGATAATACAGAATCAGATCAGACTGCAGACACTGATGCCAGCGAATCTCATCACAGTACTAACCGTCGTAGGCGGTCTCGTAGACGAAGGACTGATGAAGATGCTGTTCTGA	CDS
IP_111927.1	RP	FXR1	ATGTTCATGAAGACTCCCTTACAGTTGTTTTTGAAAATAATTGGCAACCAGAACGCCAGGTTCCATTTAATGAAGTTAGATTACCACCACCACCTGATATAA	CDS
IP_111938.1	RP	FXR1	ATGAACAGCTGCGACAGATTGGTTCTAGGTCTTATAGCGGAAGAGGCAGAGGTCGTCGGGGACCTAATTACACCTCCGGTTATGGTACAAATTCTGAGCTGTCTAACCCCTCTGAAACGGAATCTGAGCGTAAAGACGAGCTGA	CDS
IP_112000.1	RP	DCUN1D1	ATGACATGTCTAATTATGATGAAGAAGGAGCATGGCCTGTTCTTATTGATGACTTTGTGGAATTTGCACGCCCTCAAATTGCTGGGACAAAAAGTACAACAGTGTAGCACTAAAGGAACCTTCTAG	CDS
IP_112075.1	RP	KLHL24	ATGGTAAAATATATATCCTGGGCGGAAGACGGGAAAATGGAGAAGCCACAGACACTATTCTCTGTTATGATCCTGCAACAAGTATCATCACAGGGGTAG	CDS
IP_112169.1	RP	EIF2B5	ATGTGCTCCTGGGCTCTGGCACTGTCATTGGCAGCAATTGCTTTATCACCAACAGTGTCATTGGCCCCGGCTGCCACATTGGTGATAACGTGGTGCTGGACCAGACCTACCTGTGGCAGGGTGTTCGAGTGGCGGCTGGAGCACAGATCCATCAGTCTCTGCTTTGTGACAATGCTGAGGTCAAGGAACGAGTGA	CDS
IP_112181.1	MS	DVL3	ATGGCTCCAGTGGCGCCTCTGACCAGGACACACTGGCCCCTTTGCCGCACCCGGGGGCCGCCCCTTGGCCCATGGCTTTCCCGTACCAGTACCCGCCACCCCCGCACCCATACAACCCGCACCCGGGCTTCCCGGAGCTGGGCTACAGCTACGGCGGGGGCAGCGCCAGCAGTCAGCACAGCGAAGGCAGTCGGAGCAGTGGCTCCAACCGTAGCGGCAGCGATCGGAGGAAGGAGAAGGACCCGAAGGCCGGGGACTCCAAGTCCGGGGGCAGCGGCAGCGAATCGGACCACACCACACGCAGCAGCCTGCGGGGGCCGCGGGAGCGGGCGCCCAGCGAGCGCTCAGGGCCGGCGGCCAGCGAGCACAGCCACCGCAGCCACCATTCCCTGGCCAGCA…	CDS
IP_112191.1	RP	AP2M1	ATGACATCGGGAGGAACGCAGTGGATGCCTTTCGGGTCAATGTTATCCATGCCCGGCAGCAGGTGCGCAGCCCCGTCACCAACATTGCTCGCACCAGCTTCTTCCACGTTAAGCGGTCCAACATTTGGCTGGCAGCAGTCACCAAGCAGAATGTCAACGCTGCCATGGTCTTCGAATTCCTCTATAAGATGTGTGACGTGA	CDS
IP_112192.1	RP	AP2M1	ATGACAAGATTGTTATTGAAAAGCAGGGCAAAGGCACAGCTGATGAAACAAGCAAGAGCGGGAAGCAATCAATTGCCATTGATGACTGCACCTTCCACCAGTGTGTGCGACTCAGCAAGTTTGACTCTGAACGCAGCATCAGCTTTATCCCGCCAGATGGAGAGTTTGAGCTTATGA	CDS
IP_112200.1	RP	ABCF3	ATGACGCGGGCATCAGGGCCGTGTGCCAGCGCATGTACAACACTCTGCGTCTGGCTGAGCCACAAAGCCAGGGAAATAGCCAGGTGCTACTGGACGCCCCTATCCAGTTGTCAAAGATAA	CDS
IP_112246.1	MS and RP	PSMD2	ATGTATTGTATGGGCTGGTGGCTGCCATGCAGCCCCGAATGCTGGTTACGTTTGATGAGGAGCTGCGGCCATTGCCAGTGTCTGTCCGTGTGGGCCAGGCAGTGGATGTGGTGGGCCAGGCTGGCAAGCCGAAGACTATCACAGGGTTCCAGACGCATACAACCCCAGTGTTGTTGGCCCACGGGGAACGGGCAGAATTGGCCACTGAGGAGTTTCTTCCTGTTACCCCCATTCTGGAAGGTTTTGTTATCCTTCGGAAGAACCCCAATTATGATCTCTAAGTGA	CDS
IP_112247.1	MS and RP	PSMD2	ATGCTCGTTGGCTTCCTCTTGGACTGGGTCTCAACCACCTGGGGAAGGGTGAGGCCATCGAGGCAATCCTGGCTGCACTGGAGGTTGTGTCAGAGCCATTCCGCAGTTTTGCCAACACACTGGTGGATGTGTGTGCATATGCAGGCTCTGGGAATGTGCTGA	CDS
IP_112250.1	RP	PSMD2	ATGATGCTGATCCAGAAGTTTCCTATAACTCCATTTTTGCCATGGGCATGGTGGGCAGTGGTACCAATAATGCCCGTCTGGCTGCAATGCTGCGCCAGTTAG	CDS
IP_112479.1	RP	TRA2B	ATGGCAGCTCTCGCCGTCGGGATTACTATGACAGAGGATATGATCGGGGCTATGATGATCGGGACTACTATAGCAGATCATACAGAGGAGGAGGTGGAGGAGGAGGAGGATGGAGAGCTGCCCAAGACAGGGATCAGATTTATAGAAGGCGGTCACCTTCTCCTTACTATAGTCGTGGAGGATACAGATCACGTTCCAGATCTCGATCATACTCACCTCGTCGCTATTAAAGCATGA	CDS
IP_112503.1	RP	ETV5	ATGCTGAAACCTCTCAAAGTGGTATTAGAGACGCTGAAAGCACCATGGACGGGTTTTATGATCAGCAAGTCCCTTTTATGGTCCCAGGGAAATCTCGATCTGAGGAATGCAGAGGGCGGCCTGTGA	5'UTR
IP_112504.1	RP	ETV5	ATGATGAACAGTTTGTCCCAGATTTTCAGTCTGATAACCTGGTGCTTCATGCCCCACCTCCAACCAAGATCAAACGGGAGCTGCACAGCCCCTCCTCTGAGCTGTCGTCTTGTAGCCATGAGCAGGCTCTTGGTGCTAACTATGGAGAAAAGTGCCTCTACAACTATTGTGCCTATGATAGGAAGCCTCCCTCTGGGTTCAAGCCATTAA	CDS
IP_112535.1	RP	DNAJB11	ATGGTCACAAGGTACATATTTCCCGGGATAAGATCACCAGGCCAGGAGCGAAGCTATGGAAGAAAGGGGAAGGGCTCCCCAACTTTGACAACAACAATATCAAGGGCTCTTTGA	CDS
IP_112536.1	RP	DNAJB11	ATGGTCATCAGAGCTCCCATGGAGACATTTTTTCACACTTCTTTGGGGATTTTGGTTTCATGTTTGGAGGAACCCCTCGTCAGCAAGACAGAAATATTCCAAGAGGAAGTGATATTATTGTAG	CDS
IP_112537.1	RP	DNAJB11	ATGGGGAGCCTGGAGATTTACGGTTCCGAATCAAAGTTGTCAAGCACCCAATATTTGAAAGGAGAGGAGATGATTTGTACACAAATGTGA	CDS
IP_112550.1	MS	HRG	ATGAGAACATCAATGGTGTACCGCCTCATTTGGGACATCCCTTCCACTGGGGTGGGCATGAGCGTTCTTCTACCACCAAGCCTCCATTCAAGCCCCATGGATCTAGAGATCATCATCATCCCCACAAGCCACACGAACATGGACCCCCACCTCCTCCAGATGAAAGAGATCACTCACATGGACCCCCACTTCCACAAGGCCCTCCTCCACTATTGCCCATGTCCTGCTCAAGTTGTCAACATGCCACTTTTGGCACAAATGGGGCCCAAAGACATTCTCATAATAATAATTCCAGTGACCTCCATCCCCATAAGCATCATTCCCATGAACAGCATCCCCACGGACACCATCCCCATGCACACCATCCTCATGAACATGATACCCATAGACAGCATCCCC…	CDS
IP_112911.1	MS	MB21D2	ATGATATTGTCCCTGTGGTATCTTTCAAAGGTTGGCCTGCAGTGGCCCAGAGCTGGCTCATGGAGAACCACTTTTGGGATGGGAAGATTACTGAGGAAGAGGTCATCAGTGGGTTTTACTTGGTGCCTGCTTGCTCCTACAAGGGTAAGAAGGACAATGAATGGCGGCTGTCCTTTGCCAGGAGCGAGGTGCAGTTGA	CDS
IP_112942.1	RP	OPA1	ATGTTCTCTCTGATTATGATGCCAGTTATAATACGCAAGATCATCTGCCACGGGTTGTTGTGGTTGGAGATCAGAGTGCTGGAAAGACTAGTGTGTTGGAAATGA	CDS
IP_113079.1	RP	ACAP2	ATGACAGTGGAATTCAGCAGAGCTCTGATGATGGAAGAGAATCTTTACCCTCCACGGTGTCAGCCAATAGTTTATATGAGCCTGAAGGAGAAAGGCAAGATTCTTCTATGTTTCTTGACTCGAAACATCTTAATCCAGGACTTCAGCTTTATAGGGCGTCATATGAAAAAAACCTTCCTAAAATGGCTGAGGCTTTGGCTCATGGTGCAGACGTGA	CDS
IP_113083.1	RP	ACAP2	ATGCCTTCAAAACTTGGAACAGGCGCTGGTTTTCAATACAGAATAATCAGTTGGTTTACCAGAAAAAATTTAAGGATAATCCGACTGTGGTAG	CDS
IP_113194.1	RP	TFRC	ATGCTGCTTTCCCTTTCCTTGCATATTCTGGAATCCCAGCAGTTTCTTTCTGTTTTTGCGAGGACACAGATTATCCTTATTTGGGTACCACCATGGACACCTATAAGGAACTGA	CDS
IP_113232.1	RP	UBXN7	ATGGTGGAGGAATCGCTGAAGAGCCCAGTACCAGTTCAGCAAGTGTCTCTACTGTCAGACCACACACAGAAGAAGAAGTTCGTGCCCCAATTCCTCAAAAGCAGGAAATACTGGTGGAACCAGAACCATTATTTGGTGCTCCTAAAAGACGACGGCCTGCACGTTCAATTTTTGATGGTTTCCGGGATTTTCAGACTGAAACTATTCGGCAAGAACAAGAATTAA	CDS
IP_113276.1	RP	NRROS	ATGGGAGCCTCGCCCCACTCCAGGATGTTGCCCCCATGTTACAGGTCCTGTCTCTCAGGAACATGGGCCTCCACTCCAGCTTTATGGCGTTGGACTTCTCTGGGTTTGGGAATCTCAGGGACTTAG	CDS
IP_113287.1	RP	PIGX	ATGCCAGACGAGATTCACAGTGCATTGACTGTTTTCAAGCCTTTTTGCCTGTGCACTGCCGCTATCATCGGCCGCACAGTGAAGATGGAGAAGCCTCGATTGTGGTCAATAACCCAGATTTGTTGA	CDS
IP_113323.1	RP	NCBP2	ATGGGACGCGTCTGGATGACCGAATCATTCGCACAGACTGGGACGCAGGCTTTAAGGAGGGCAGGCAATACGGCCGTGGGCGATCTGGGGGCCAGGTTCGGGATGAGTATCGGCAGGACTACGATGCTGGGAGAGGAGGCTATGGAAAACTGGCACAGAACCAGTGAGTGGTGA	CDS
IP_113427.1	RP	LRCH3	ATGATAGGAGACCGTTGGGTTTTGGCTCCTGCCATGAAGAACTGTACTCAAGTCGCCCTTATGGAGCCCTTGATTCAGGCTTCAATAGTGTGGACAGTGGTGATAAGAGATGGTCAGGGAATGAACCTACAGATGAATTTTCAGATCTGCCTCTTCGAGTAG	CDS
IP_115186.1	RP	PIGG	ATGTGCCGTCATATGAAAAAGATCCTGGGTTTGAGCAGTTTAAAATGTCAGAAAGATTGCATGGGAACTGGATCAGACTGTACTTGGAGGAAAAGCATTCAGAAGTCCTATTCAACCTGGGCTCCAAGGTTCTCAGGCAGTACCTGGATGCTCTGA	CDS
IP_115489.1	RP	SLBP	ATGGGAAGAACACAATTGCCTACGATCGTTATATTAAAGAAGTCCCAAGACACCTTCGACAACCTGGCATTCATCCCAAGACCCCTAATAAATTTAAGAAGTATAGTCGACGTTCATGGGACCAGCAAATCAAACTCTGGAAGGTGGCTCTGCATTTTTGGGATCCTCCAGCGGAAGAAGGATGTGATTTGCAAGAAATACACCCTGTAG	CDS
IP_115775.1	RP	ADD1	ATGTGGAGGTTCCTGCTAGTGTCACAGGTTACTCCTTTGCTAGTGACGGTGATTCGGGCACTTGCTCCCCACTCAGACACAGTTTTCAGAAGCAGCAGCGGGAGAAGACAAGATGGCTGA	CDS
IP_115848.1	RP	HTT	ATGGAGACCCACAGGTTCGAGGAGCCACTGCCATTCTCTGTGGGACCCTCATCTGCTCCATCCTCAGCAGGTCCCGCTTCCACGTGGGAGATTGGATGGGCACCATTAGAACCCTCACAGGAAATACATTTTCTTTGGCGGATTGCATTCCTTTGCTGCGGAAAACACTGA	CDS
IP_115925.1	RP	LRPAP1	ATGACCCCAGGCTGGAAAAGCTGTGGCACAAGGCGAAGACCTCTGGGAAATTCTCCGGCGAAGAACTGGACAAGCTCTGGCGGGAGTTCCTGCATCACAAAGAGAAAGTTCACGAGTACAACGTCCTGCTGGAGACCCTGA	CDS
IP_116209.1	RP	TBC1D14	ATGACTTGGGATGGAAGTTATTTGGGAAAGCGCCACTCCGAGAGAATGCCCAGAAGGATTCAAAGAGAATACAGAAGGAATATGAAGACAAGGCTGGAAGACCTAGCAAGCCACCCTCTCCAAAGCAGAATGTGA	CDS
IP_116282.1	MS	AFAP1	ATGCCCACCCCAGCGGGACGGCACTTCATTATGACGATGTCCCGTGCATCAACGGCTCGTGGGAACCGGAAGACGGCTTTCCTGCTTCCTGCAGCAGAGGCTTGGGAGAAGAGGTGCTTTATGATAACGCAGGCCTGTACGATAACTTGCCGCCTCCGCACATCTTTGCCCGCTACTCTCCTGCTGACAGAAAGGCCTCTAGGCTGTCTGCTGACAAGCTGTCCTCTAACCATTACAAATACCCTGCCTCCGCTCAGTCTGTCACTAATACCTCTTCTGTGGGGAGGGCGTCTCTCGGGCTCAACTCGCAGCTCAAGGGTAAAAAGCCCCCCGTGGCGTCTAATGGGGTCACAGGAAAAGGGAAGACTCTGA	CDS
IP_116489.1	RP	WDR1	ATGAGTACCAGCCTTTCGCTGGGAAGATCAAAGACATTGCTTGGACTGAAGACAGTAAGAGGATCGCCGTGGTCGGGGAAGGAAGGGAGAAGTTTGGAGCAGTCTTCCTCTGGGATAGTGGCTCTTCTGTGGGCGAGATTACAGGACACAACAAAGTCATCAACAGCGTGGACATCAAGCAGAGCCGGCCATACCGGCTGGCCACGGGAAGCGATGATAACTGCGCGGCATTCTTTGAGGGACCCCCATTCAAGTTCAAGTTCACAATTGGCGACCACAGCCGCTTTGTCAACTGTGTGCGATTCTCTCCTGATGGGAACAGATTTGCCACAGCCAGTGCTGACGGCCAGATATACATCTATGACGGGAAGACTGGGGAGAAGGTGTGCGCGCTGGGCG…	CDS
IP_116564.1	RP	CPEB2	ATGACCAGATGTGTGATGAATGCCAGGGCGCACGCTGTGGTGGAAAATTTGCTCCCTTTTTTTGTGCCAATGTCACTTGCCTGCAGTATTACTGTGAGTTTTGTTGGGCAAATATCCACTCTCGTGCTGGACGTGAGTTCCATAAGCCATTGGTAA	CDS
IP_116720.1	RP	LAP3	ATGAAGGCAAAGAAAACATCAGAGCTGCTGTTGCAGCGGGGTGCAGGCAGATTCAAGACCTGGAGCTCTCGTCTGTGGAGGTGGATCCCTGTGGAGACGCTCAGGCTGCTGCGGAGGGAGCGGTGCTTGGTCTCTATGAATACGATGACCTAA	CDS
IP_116724.1	RP	MED28	ATGTCAATGGCACCGATCAGGAAGAAATTCGAACCGGTGTTGATCAGTGTATCCAGAAGTTTCTGGATATTGCAAGACAGACAGAATGTTTTTTCTTACAAAAAAGATTGCAGTTATCTGTCCAGAAACCAGAGCAAGTTATCAAAGAGGATGTGTCAGAACTAA	CDS
IP_116743.1	RP	NCAPG	ATGATAAGACAGTTTTTCATGAGGAGTTCATTCATTACCTTAAATATGTTATGGTGGTCTATAAACGTGAACCAGCTGTGGAGAGGGTAA	CDS
IP_116871.1	RP	DHX15	ATGTACGCCAGCAGCTATCTCGAATTATGGACAGATTTAATTTGCCTCGTCGAAGTACTGACTTTACAAGCAGGGACTATTATATTAATATAA	CDS
IP_116873.1	RP	DHX15	ATGAGGTCCTATCTATTACTGCTATGTTGTCAGTCCCACAGTGTTTTGTTCGCCCCACGGAGGCCAAGAAAGCCGCAGATGAGGCCAAGATGA	CDS
IP_116874.1	RP	DHX15	ATGATTTGGGCCCTGAAGTTGGTGACATTAAAATCATTCCATTGTATTCTACACTTCCACCTCAGCAGCAGCAACGCATTTTTGAGCCTCCACCTCCCAAAAAACAGAATGGAGCAATTGGAAGAAAGGTAG	CDS
IP_117007.1	RP	RBPJ	ATGCAAAAGTTGCACAGAAGTCATATGGAAATGAAAAAAGGTTTTTTTGCCCACCTCCTTGTGTATATCTTATGGGCAGTGGATGGAAGAAAAAAAAAGAACAAATGGAACGCGATGGTTGTTCTGAACAAGAGTCTCAACCGTGTGCATTTATTGGGATAG	CDS
IP_117176.1	MS and RP	PGM2	ATGCTGATAGACTTGCTGTGGCAGAAAAGCAAGACAGTGGTGAATGGAGGGTGTTTTCAGGCAATGAGTTGGGGGCCCTCCTGGGCTGGTGGCTTTTTACATCTTGGAAAGAGAAGAACCAGGATCGCAGTGCTCTCAAAGACACGTACATGTTGTCCAGCACCGTCTCCTCCAAAATCTTGCGGGCCATTGCCTTAA	CDS
IP_117306.1	MS	WDR19	ATGAAAAAAGTGATGGATTTGTTTACTGTCCAGTCAATGACGCTACCTATGAGATTCCAGATTTTTCACCAACCATTAAAGGTGTTCTTTGGGAAAACTGGCCAATGGATAAAGGTGTATTTATTGCTTATGATGATGATAAGGTGTACACTTATGTCTTTCACAAGGACACTATACAAGGAGCCAAGGTTATTTTGGCTGGTAGCACCAAAGTTCCTTTTGCTCATAAACCTTTGCTGCTATATAATGGAGAGCTGA	CDS
IP_117353.1	RP	UGDH	ATGAAACTCCAGAGGGCCAGAGAGCTGTGCAGGCCCTGTGTGCTGTATATGAGCACTGGGTTCCCAGAGAAAAGATCCTCACCACTAATACTTGGTCTTCAGAGCTTTCCAAACTGGCAGCAAATGCTTTTCTTGCCCAGAGAATAA	CDS
IP_117385.1	RP	PDS5A	ATGAATCGGGACCTCCCGCCCCTTCCAAACCCAGGAGAGGACGTCGACCCAAGTCTGAATCTCAGGGCAATGCTACCAAAAATGATGATCTAA	CDS
IP_117494.1	MS	LIMCH1	ATGGGACAAGTGAACGAAGGAAAAGCATCAAAACCTACAGAGAAATTGTTCAAGAAAAAGAGCGGAGAGAGAGAGAGCTGCATGAAGCATATAAGAACGCTCGGTCCCAGGAGGAGGCAGAGGGGATCCTTCAACAGTACATTGAGAGGTTCACCATCAGTGAGGCTGTTCTCGAACGCTTGGAGATGCCAAAAATTCTGGAAAGAAGCCATTCAACAGAGCCAAATTTATCCTCCTTCCTGA	CDS
IP_117572.1	RP	SLC30A9	ATGGAGTCAGTTGGTACCGGTGGCGGCGCGGAGGCAGAAGGCGGTGTCCGAGTAGGGGCCTCTGCCCCACCAGGATGTTACCCGGCTTGGCCGCCGCCGCGGCCCACAGATGTAGCTGGTCCTCCCTGTGCCGGCTCCGTCTGCGATGCAGGGCGGCGGCCTGTAATCCCAGCGACCGCCAGGAGTGGCAGAATTTAG	5'UTR
IP_117735.1	RP	GABRA4	ATGGCATGTTGCAAAGATGGTTTCTGCCAAGAAGGTACCCGCGATCGCTCTGTCCGCCGGGGTCAGTTTCGCCCTCCTGCGCTTCCTGTGCCTGGCGGTTTGTTTAAACGAATCCCCAGGACAGAACCAAAAGGAGGAGAAATTGTGCACAGAAAATTTCACCCGCATCCTGGACAGTTTGCTCGATGGTTATGA	5'UTR
IP_117799.1	RP	NFXL1	ATGATGATTTTGGAAAGAAAGATTGTCCCTGGCCTTGTCCAAAATGTAGGTTTGAATACAAACGATCTGAAACACCTAGTAGGTACTATTGCTATTGTGGAAAAGTAG	CDS
IP_118076.1	RP	CHIC2	ATGAGGAAGAGGAGGACGAGGAGCGGGCCCTGGAGGAGCAGCTGCTCAAGTACTCGCCGGACCCGGTGGTCGTCCGCGGCTCCGGTCACGTCACCGTATTTGGACTGA	CDS
IP_118261.1	RP	PPAT	ATGTGGCGTGTTCGGGTGCATCGCCTCAGGAGAGTGGCCCACGCAGCTGGATGTACCGCATGTGATCACTCTGGGACTCGTGGGGCTGCAGCACCGGGGTCAGGAGAGTGCTGGTATTGTGACTAG	CDS
IP_118266.1	RP	PAICS	ATGTGTGGTCTTCTCTTCGACTACCCAGTGGTCTTGGCTGTTCAACCGTACTTTCTCCAGAAGGATCAGCTCAATTTGCTGCTCAGATATTTGGGTTAA	CDS
IP_118268.1	RP	PAICS	ATGTTATTGACAATGATTCCTGGAGACTCTGGCCATCAGGAGATCGAAGCCAACAGAAAGACAAACAGTCTTATCGGGACCTCAAAGAAGTAA	CDS
IP_118278.1	RP	SRP72	ATGATTATGATGAGGAGAGGAAAACAAACCTTTCAGCAGTTGTTGCAGCTCAAAGCAATTGGGAAAAAGTGGTTCCAGAGAACCTGGGCCTCCAAGAAGGCACACATGAGCTGTGCTACAACACTGCATGTGCACTGA	CDS
IP_118288.1	RP	SRP72	ATGTTGAGGCTCTTGAAAATTCTGCTGGTGCTACATACATTCGGAAGAAGGGTGGAAAAGTTACTGGAGATAGTCAACCAAAGGAACAAGGACAGGGAGATTTGA	CDS
IP_118350.1	RP	POLR2B	ATGCCACTCCATTTAATGATGCTGTTAACGTGCAGAAGATTTCTAATCTTTTATCTGATTATGGCTATCATCTCAGAGGAAATGAGGTCCTGTACAATGGGTTCACTGGTCGAAAAATCACATCACAAATATTTATTGGCCCCACTTATTACCAGCGTTTGA	CDS
IP_118351.1	RP	POLR2B	ATGAAGATGAATTGGAGAGCACCAATAGACGCTATACCAAGAGAGACTGTAGCACTTTTCTCAGAACTAGCGAGACGGGCATTGTGGATCAGGTTATGGTAA	CDS
IP_118491.1	RP	YTHDC1	ATGGACAGGAAATTGAACTTGAATGTGGAACCCAGCTTTGTCTTCTGTTTCCCCCCGATGAAAGTATTGACTTGTATCAGGTCATTCATAAAATGCGTCACAAGAGAAGAATGCATTCTCAGCCCCGATCACGAGGACGTCCATCCCGTCGAGAACCAGTCCGGGATGTGGGAAGGCGTCGACCAGAAGATTATGATATTCATAACAGCAGAAAGAAACCAAGGATTGACTATCCCCCTGAGTTTCACCAGAGACCAGGGTATTTAA	CDS
IP_118494.1	RP	YTHDC1	ATGATGAACTGTATAATCCAGAGAGTGAACAAGATAAAAATGAGAAAAAGGGATCAAAAAGAAAAAGTGATCGAATGGAATCTACTGATACCAAACGACAAAAGCCTTCTGTCCATTCTAGACAACTGGTTTCTAAGCCACTGA	CDS
IP_118509.1	MS and RP	YTHDC1	ATGCAGAAGAAGATGAAGAGGTGGATGAAGATGGAGAGGAGGAGGAGGAAGAGGAGGAGGAGGAAGAGGAGGAGGAGGAGGAGGAAGAAGAAGAATATGAACAGGATGAGAGAGACCAGAAAGAGGAGGGAAATGATTATGACACTCGAAGTGAGGCCAGTGACTCTGGTTCTGAATCTGTTTCCTTCACAGATGGGTCTGTCAGATCTGGTTCAGGCACAGATGGATCAGATGAGAAAAAGAAGGAAAGGAAGAGAGCTAGAGGCATATCTCCAATTGTTTTTGATAGAAGTGGAAGCTCTGCATCAGAGTCATATGCAGGTTCAGAAAAGAAGCATGAGAAATTATCATCTTCCGTTCGTGCTGTCCGAAAAGATCAAACCAGTAAACTCAAATATG…	CDS
IP_118739.1	RP	MOB1B	ATGATGAGACGTTATTTCCATCAAAAATTGGTGTCCCGTTCCCAAAGAATTTCATGTCTGTGGCAAAAACTATACTCAAACGCCTCTTTAGGGTTTATGCTCACATTTATCATCAGCATTTTGACCCTGTGA	CDS
IP_118760.1	RP	DCK	ATGGCAAGCTCAAAGATGCAGAGAAACCTGTATTATTTTTTGAACGATCTGTGTATAGTGACAGGTATATTTTTGCATCTAATTTGTATGAATCTGAATGCATGA	CDS
IP_118839.1	RP	ANKRD17	ATGTTGGTGTTGTGGAAATATTGCTGGACAATGGTGCAGACATTGAAGCCCAGTCTGAAAGAACCAAGGACACACCACTCTCCTTGGCTTGTTCTGGGGGAAGACAGGAGGTGGTGGAGCTATTGTTAG	CDS
IP_118847.1	RP	ANKRD17	ATGCACGGTTACAGCAAGTGGATCCTGTTTTACTTAAAGATGAACCCCAGCAGACTGCTGCTCAGATGGGTTTTGCGCCAATCCAGCCTCTGGCGATGCCTCAAGCTTTGCCTCTGGCGGCAGGTCCCTTGCCTCCAGGGTCCATCGCAAATCTTACAGAACTGCAAGGAGTGA	CDS
IP_119063.1	RP	G3BP2	ATGTGGAAGAGAAAAAAACAAGAGCTGCAAGAGAGCGAGAAACCAGAGGTGGTGGTGATGATCGCAGGGATATTAGGCGCAATGATCGAGGTCCCGGTGGTCCACGTGGAATTGTGGGTGGTGGAATGA	CDS
IP_119080.1	RP	USO1	ATGTTCCATTTCTTACAGGACAAATTGCAGAAAATCTTGGAGAAGAAGAGCAGTTGGTCCAAGGCTTATGTGCCCTTTTGTTGGGCATTTCGATTTATTTCAATGATAACTCACTTGAGAGCTACATGA	CDS
IP_119087.1	RP	USO1	ATGAAAGGCAGCCATTTGTTTTGCGCTGTGCTGTTCTCTATTGTTTCCAGTGTTTCTTGTATAAAAACCAAAAAGGACAAGGAGAAATCGTGTCAACACTTTTACCTTCTACCATTGATGCAACAGGTAATTCAGTTTCAGCTGGCCAGTTATTATGTGGAGGTTTGTTTTCTACTGATTCACTTTCAAACTGGTGTGCTGCTGTGGCCCTTGCCCATGCGTTGCAAGAAAATGCCACCCAGAAAGAACAGTTGCTCAGGGTTCAACTTGCTACAAGTATTGGCAACCCTCCAGTTTCTTTACTTCAACAGTGCACCAATATTCTTTCACAGGGAAGCAAAATACAAACAAGAGTTGGATTATTAA	CDS
IP_119128.1	RP	SDAD1	ATGCTAAAGATTACATTCCAGGAGCAGAAGTTCTGGAAGTTGAGAAAGAAGAGAATGCTGAAAATGATGAAGATGGATGGGAAAGTACCAGTCTCAGTGAGGAGGAGGATGCTGATGGTGAATGGATTGATGTGCAACACTCTTCCGATGAAGAACAGCAAGAAATCTCCAAGAAGCTGA	CDS
IP_119177.1	RP	NUP54	ATGATCAGACAGAAGTTGTTATTTATGTTGTTGAGCGTTCGCCAAATGGTACTTCAAGAAGAGTTCCAGCTACAACGCTATATGCCCATTTTGAACAAGCCAATATAA	CDS
IP_119286.1	MS and RP	CCNI	ATGACCCCGCGTCACCACTGTGAGGCCTACAGCTCTGCCGGGGAGGAGGAGGAGGAGGAAGAGGAGGAGAAGGTAGCTACAGCAAGCTGGGTAGCAGGCAGATCCAAAGGATATCATGAAGTTTCCAGGGCCTTTGGAAAACCAGAGATTGTCTTTCCTGTTGGAAAAGGCAATCACTAG	5'UTR
IP_119288.1	RP	CCNI	ATGACTTCTATGATGGAATCAAACGGCTCTATAATGAAGATAATGTCTCAGAAAATGTGGGTTCTGTGTGTGGCACTGATTTATCAAGACAAGAGGGACATGCTTCCCCTTGTCCACCTTTGCAGCCTGTTTCTGTCATGTAGTTTCAACAAGTGCTACCTTTGA	CDS
IP_119550.1	RP	HNRNPD	ATGGCAACTATGGATATAACAGCCAAGGTTACGGTGGTTATGGAGGATATGACTACACTGGTTACAACAACTACTATGGATATGGTGATTATAGCAACCAGCAGAGTGGTTATGGGAAGGTATCCAGGCGAGGTGGTCATCAAAATAGCTACAAACCATACTAAATTATTCCATTTGCAACTTATCCCCAACAGGTGGTGA	CDS
IP_119559.1	RP	HNRNPDL	ATGATCAAGGATATGGAAATTACAATAGTGCCTATGGTGGTGATCAAAACTATAGTGGCTATGGCGGATATGATTATACTGGGTATAACTATGGGAACTATGGATATGGACAGGGATATGCAGACTACAGTGGCCAACAGAGCACTTATGGCAAGGCATCTCGAGGGGGTGGCAATCACCAAAACAATTACCAGCCATACTAAAGGAGAACATTGGAGAAAACAGGAGGAGATGTTAAAGTAA	CDS
IP_119588.1	RP	SEC31A	ATGAATCACCTAAAATTCCGTACGAGAAACAGCAGCTCCCCAAGGGCAGGCCTGGACCAGTTGCTGGCCACCACCAGATGCCAAGAGTTCAAACTCAACAATATTATCCCCATGGAGAAAATCCTCCACCTCCGGGTTTCATAA	CDS
IP_119593.1	RP	SEC31A	ATGCTAAGATTCTCTGCTCCAATCCAAACACAGGAGAGGTGTTATATGAACTTCCCACCAACACACAGTGGTGCTTCGATATTCAGTGGTGTCCCCGAAATCCTGCTGTCTTATCAGCTGCTTCGTTTGATGGGCGTATCAGTGTTTATTCTATCATGGGAGGTAGCACAGATGGTTTAA	CDS
IP_119659.1	MS	HPSE	ATGGCCCTACCAGGAGCAATTGCTACTCCGAGAACACTACCAGAAAAAGTTCAAGAACAGCACCTACTCAAGAAGCTCTGTAGATGTGCTATACACTTTTGCAAACTGCTCAGGACTGGACTTGATCTTTGGCCTAAATGCGTTATTAAGAACAGCAGATTTGCAGTGGAACAGTTCTAA	CDS
IP_120005.1	RP	PPM1K	ATGAGGTCCTGTACTTTGCAGTGTATGATGGACACGGTGGACCTGCAGCAGCTGATTTCTGTCATACCCACATGGAGAAATGTATTATGGATTTGCTTCCTAAGGAGAAGAACTTGGAAACTCTGTTGA	CDS
IP_120006.1	RP	PPM1K	ATGGTAGTGGGAGTCCAGCTACCTGGGACAATTTTGGGATCTGGGATAACCGCATTGATGAGCCAATTCTGCTGCCACCCAGCATTAAGTATGGCAAGCCAATTCCCAAAATCAGCTTGGAAAATGTGGGGTGCGCCTCACAGATTGGCAAACGGAAAGAGAATGAAGATCGGTTTGACTTCGCTCAGCTGA	CDS
IP_120032.1	MS	HERC6	ATGCACACACTGCGGTGCTTACCCAGGACGGGAAAGTGTTCACATTTGGAGACAATCGCTCTGGACAGCTGGGATACAGCCCCACTCCTGAGAAGAGAGGTCCACAACTTGTGGAAAGAATTGATGGCCTAG	CDS
IP_120050.1	MS	HERC3	ATGCAAATACAATCAATGGTGTTGTTCAGATATTATCTTCTGCAGCCTGTTGGAATGGAAGTTTTCTTGAAAAAAAAATTGATGAACATTTTAAAACGAGTCCCAAAATCCCTGGGATTGACCTGA	CDS
IP_120193.1	RP	SMARCAD1	ATGGAACATAGAACAACCTTCCATTCTAAACCAAAGTTTGTCACTCAAGCCCTATCAGAAGGTTGGTTTGAATTGGCTGGCATTGGTACATAA	CDS
IP_120211.1	RP	PDLIM5	ATGTGGTCGATGCCAAAGGAAGATCCTTGGAGAAGTCATCAGTGCGTTGAAACAAACTTGGCATGTTTCCTGTTTTGTGTGTGTAGCCTGTGGAAAGCCCATTCGGAACAATGTTTTTCACTTGGAGGATGGTGA	CDS
IP_120220.1	RP	PDLIM5	ATGACACTTGCTTTGTATGCTCAGTGTGTTGTGAAAGTTTGGAAGGTCAGACCTTTTTCTCCAAGAAGGACAAGCCCCTGTGTAAGAAACATGCTCATTCTGTGA	CDS
IP_120224.1	RP	PDLIM5	ATGGGAAAATCCCACCTAAACGCCCACCAAGAAAACACATTGTGGAGCGCTATACAGAGTTTTATCATGTACCCACTCACAGTGATGCCAGCAAGAAGAGACTGA	CDS
IP_120313.1	RP	RAP1GDS1	ATGATATTACTGAGCTCAAAACTGGTTCAGATCTCATGGTTTTATTACTTCTTGGAGATGAATCCATGCAGAAGTTATTTGAAGGAGGAAAAGGTAGTGTATTTCAAAGGGTACTCTCTTGGATCCCATCAAATAACCACCAGCTACAGCTTGCTGGAGCATTGGCAATTGCAAATTTTGCCAGAAATGATGCAAATTGTATTCATATGGTAG	CDS
IP_120360.1	RP	METAP1	ATGAAGTCATTTGCCATGGAATACCAGACAGAAGGCCCTTACAAGAAGGTGACATTGTTAATGTGGATATCACTCTTTATCGCAATGGTTATCATGGGGACCTGA	CDS
IP_120376.1	MS and RP	ADH5	ATGGTACCAGCAGATTTACTTGCAAAGGAAAGACAATTTTGCATTACATGGGAACCAGCACATTTTCTGAATACACAGTTGTGGCTGATATCTCTGTTGCTAAAATAG	CDS
IP_120474.1	RP	DAPP1	ATGGAGAGGCTGAGCTGCTCCAGGACTTGGGGTGGTATCACGGCAACCTCACACGCCATGCTGCTGAAGCTCTTCTCCTCTCAAATGGATGTGACGGCAGCTACCTTCTGA	CDS
IP_120603.1	RP	NFKB1	ATGACATCCAGATTCGATTTTATGAAGAGGAAGAAAATGGTGGAGTCTGGGAAGGATTTGGAGATTTTTCCCCCACAGATGTTCATAGACAATTTGCCATTGTCTTCAAAACTCCAAAGTATAAAGATATTAATATTACAAAACCAGCCTCTGTGTTTGTCCAGCTTCGGAGGAAATCTGACTTGGAAACTAGTGAACCAAAACCTTTCCTCTACTATCCTGAAATCAAAGATAAAGAAGAAGTGCAGAGGAAACGTCAGAAGCTCATGCCCAATTTTTCGGATAGTTTCGGCGGTGGTAGTGGTGCTGGAGCTGGAGGCGGAGGCATGTTTGGTAGTGGCGGTGGAGGAGGGGGCACTGGAAGTACAGGTCCAGGGTATAGCTTCCCACACTATGGAT…	CDS
IP_120781.1	RP	INTS12	ATGAATCTTTGGCTCGGGGCATTGATTCCAGTTACCGTCCATCTCAAAAGGATGTGGAGCCACCCAAAATTTCAAGCACAAAAAACATTTCCATTAAGCAAGAGCCCAAAATATCATCCAGTCTTCCTTCTGGTAATAATAATGGCAAGGTCCTCACAACTGAAAAGGTAA	CDS
IP_120922.1	RP	OSTC	ATGTCCCAACCTGAAGCTGAAGAAGCCGCCCTGGTTGCACATGCCGTCGGCCATGACTGTGTATGCTCTGGTGGTGGTGTCTTACTTCCTCATCACCGGAGGAATAATTTATGA	CDS
IP_121049.1	RP	ELOVL6	ATGAATTCGAAAAGCAGTTCAACGAGAATGAAGCCATCCAATGGATGCAGGAAAACTGGAAGAAATCTTTCCTGTTTTCTGCTCTGTATGCTGCCTTTATATTCGGTGGTCGGCACCTAA	CDS
IP_121067.1	MS	ENPEP	ATGAACCAACAGATGCCAGGAAATCTTTTCCTTGTTTTGATGAGCCCAACAAAAAGGCAACTTATACAATATCTATCACCCATCCCAAAGAATACGGAGCACTTTCAAATATGCCAGTGGCGAAAGAAGAGTCAGTGGATGATAAATGGACTCGAACAACTTTTGAGAAGTCTGTCCCCATGA	CDS
IP_121198.1	RP	CAMK2D	ATGGAAAGCCAGTGGATATGTGGGCATGTGGTGTCATTCTCTATATTCTACTTGTGGGGTATCCACCCTTCTGGGATGAAGACCAACACAGACTCTATCAGCAGATCAAGGCTGGAGCTTATGATTTTCCATCACCAGAATGGGACACGGTGA	CDS
IP_121295.1	RP	METTL14	ATGAGCAGAGAGAAATTGCTGAAACAAGAGAAACTTGCAGGGCTTCCTATGATACCTCTGCTCCAAATGCAAAACGTAAGTATCTGGATGAAGGAGAGACAGATGAAGACAAAATGGAAGAATATAAGGATGAACTAG	CDS
IP_121453.1	RP	ANXA5	ATGAAGAAGAATATGGCTCAAGCCTGGAAGATGACGTGGTGGGGGACACTTCAGGGTACTACCAGCGGATGTTGGTGGTTCTCCTTCAGGCTAACAGAGACCCTGATGCTGGAATTGATGAAGCTCAAGTTGAACAAGATGCTCAGGCTTTATTTCAGGCTGGAGAACTTAAATGGGGGACAGATGAAGAAAAGTTTATCACCATCTTTGGAACACGAAGTGTGTCTCATTTGA	CDS
IP_121692.1	RP	HSPA4L	ATGATGCTAAGAATGCCGTTGAAGAATATGTATATGATTTTAGAGACAGGCTGGGCACTGTCTATGAAAAATTCATCACTCCAGAAGACTTGA	CDS
IP_121745.1	RP	LARP1B	ATGATGATGGTACAGGTGTACAGGTGTATCCTGTGGAAGAAGCATTGCTTAAAGAGTATATTAAGCGTCAAATTGAATATTACTTCAGTGTAG	CDS
IP_121792.1	MS and RP	PGRMC2	ATGAAGAAGATACCAAGGATCACAATAAACAGGATTGAACTTTGTAAACAACCAAAGTCAGGGGCCTTCAGAACTGCAATTCTTACTCCCTTTCACAGACTGTCCGGAGTCTTTGGGTTTGATTCACCTGCTGCGAAAAACATTCAACAAATTGTGTACAAGATAAATTAA	CDS
IP_121925.1	RP	NAA15	ATGCTGGAAATATTAAAGAAGCTGCAAGGTGGATGGATGAGGCCCAGGCCTTGGACACAGCAGACAGATTTATCAACTCCAAATGTGCAAAATACATGCTAA	CDS
IP_121963.1	RP	SETD7	ATGACGGATTACCGCACGGGTTCTGCACAGTCACCTACTCCTCCACAGACAGATTTGAGGGGAACTTTGTTCACGGAGAAAAGAACGGACGGGGGAAGTTCTTCTTCTTTGATGGCAGCACCCTGGAGGGGTATTATGTGGATGATGCCTTGCAGGGCCAGGGAGTTTACACTTACGAAGATGGGGGAGTTCTCCAGGGCACGTATGTAG	CDS
IP_121988.1	RP	SCOC	ATGCTGACATGGATGCAGTTGATGCTGAAAATCAAGTGGAACTGGAGGAAAAAACAAGACTTATTAATCAAGTGTTGGAACTCCAACACACACTTGAAGATCTCTCTGCAAGAGTAG	CDS
IP_122061.1	RP	ZNF330	ATGCTGGTGTATACAGTACTGGCCTTGCAATGGTGGGTGCAATATGTGACTTCTGTGAAGCTTGGGTTTGCCATGGTAGGAAATGTCTCAGTACACATGCTTGTGCCTGCCCTCTTACCGATGCTGAGTGTGTTGAATGTGAACGAGGCGTGTGGGACCATGGAGGCAGAATATTCAGTTGTTCTTTTTGCCATAACTTTCTCTGTGAAGATGATCAATTTGAGCATCAAGCCAGCTGCCAGGTTTTAG	CDS
IP_122136.1	RP	SMARCA5	ATGAGTACTGCAGGTTGGATGGTCAGACACCCCATGATGAGAGACAAGACTCCATCAATGCATACAATGAACCAAACAGCACAAAGTTTGTTTTCATGTTAA	CDS
IP_122137.1	RP	SMARCA5	ATGAAAAGCTCTCCAAGATGGGCGAAAGTTCACTTAGAAACTTTACAATGGATACAGAGTCAAGTGTTTATAACTTCGAAGGAGAAGACTATAGAGAAAAACAAAAGATTGCATTCACAGAGTGGATTGAACCACCTAAACGAGAAAGAAAAGCCAACTATGCCGTTGATGCATATTTCAGGGAAGCTCTTCGTGTTAGTGAACCTAAAGCACCCAAGGCTCCTCGACCTCCAAAACAACCCAATGTTCAGGATTTCCAGTTCTTTCCTCCACGTTTATTTGAATTACTGGAAAAAGAAATTCTGTTTTACAGAAAAACTATTGGGTACAAGGTACCTCGAAATCCTGAGCTGCCTAATGCAGCACAGGCACAAAAAGAAGAACAGCTTAAAATTGATG…	CDS
IP_122142.1	RP	SMARCA5	ATGATGCGTCACCTGGAAAGCAAAAGGAAATCCAAGAACCAGATCCTACCTATGAAGAAAAAATGCAAACTGACCGGGCAAATAGATTCGAGTATTTATTAA	CDS
IP_122146.1	RP	SMARCA5	ATGGTATACTCGGATATTAATGAAGGATATAGATATACTCAACTCAGCAGGCAAGATGGACAAAATGAGGTTATTGAACATCCTAATGCAGTTGAGAAAATGTTGTAA	CDS
IP_122219.1	RP	ABCE1	ATGTTGAAGATCTTTCAGGAGGAGAGTTGCAGAGATTTGCTTGTGCTGTCGTTTGCATACAGAAAGCTGATATTTTCATGTTTGATGAGCCTTCTAGTTACCTAG	CDS
IP_122223.1	RP	ABCE1	ATGTCGACAGGAATGCAAAAAGAGTTGTCCTGTAGTTCGAATGGGAAAATTATGCATAGAGGTTACACCCCAGAGCAAAATAGCATGGATTTCCGAAACTCTTTGTATTGGTTGTGGTATCTGTATTAA	CDS
IP_122310.1	RP	SLC10A7	ATGTCTGGAGGGACCAAGGAAAGTGTGGAGACGCTCCAAGGATTAGGTGATCGGAGCTTGAAAAGAAAAAAAGCCAAACAAATAAACAAAACCCACCCACCCTAA	5'UTR
IP_122466.1	RP	RPS3A	ATGGTGAAGGCAGTAGTTCTGGAAAAGCCACTGGGGACGAGACAGGTGCTAAAGTTGAACGAGCTGATGGATATGAACCACCAGTCCAAGAATCTGTTTAAAGTTCAGACTTCAAATAGTGGCAAATAA	CDS
IP_122567.1	RP	ARFIP1	ATGGCTTTGACAATACCAAAGAGGGTGTTATTGAAGCAGGAGCATTTCAAGGTTCCCCAGCACCGCCACTGCCATCTGTTATGTCTCCTAGCAGGGTTGCAGCTAGTCGACTGGCTCAGCAAGGAAGTGATTTAA	CDS
IP_122710.1	RP	PLRG1	ATGGAGTGCTTGTATCTGGAGCTGACAATGGCACCATGCATCTTTGGGACTGGAGAACTGGCTACAATTTTCAGAGAGTTCACGCAGCTGTGCAACCTGGGTCTTTGGACAGTGAATCAGGAATATTTGCTTGTGCTTTTGATCAGTCTGAAAGTCGATTACTAA	CDS
IP_122714.1	RP	PLRG1	ATGAAGAGAGTCACAAACGAAAAATGGCAATCAAGCTTCGTAATGAGTATGGTCCTGTGTTGCATATGCCTACTTCAAAAGAAAATCTTAAAGAGAAGGGTCCTCAGAATGCAACGGATTCATATGTTCATAAACAGTACCCTGCCAATCAAGGACAAGAAGTTGAATACTTTGTGGCAGGTACACATCCATACCCACCAGGACCTGGGGTTGCTTTGA	CDS
IP_122720.1	MS	FGB	ATGTTGCAACCAACACAGATGGGAAGAATTACTGTGGCCTACCAGGTGAATATTGGCTTGGAAATGATAAAATTAGCCAGCTTACCAGGATGGGACCCACAGAACTTTTGA	CDS
IP_122819.1	RP	GUCY1B3	ATGATGACTCCAAAACTTATGATTTGGTTGCTGCTGCAAGCAAAGTCCTCAATCTCAATGCTGGAGAAATCCTCCAAATGTTTGGGAAGATGTTTTTCGTCTTTTGCCAAGAATCTGGTTATGATACAATCTTGCGTGTCCTGGGCTCTAATGTCAGAGAATTTCTACAGAACCTTGATGCTCTGCACGACCACCTTGCTACCATCTACCCAGGAATGCGTGCACCTTCCTTTAGGTGCACTGATGCAGAAAAGGGCAAAGGACTCATTTTGCACTACTACTCAGAGAGAGAAGGACTTCAGGATATTGTCATTGGAATCATCAAAACAGTGGCACAACAAATCCATGGCACTGAAATAG	CDS
IP_122865.1	MS	GRIA2	ATGCACAGAATATTAACCCATCTTCCTCGCAGAATTCACAGAATTTTGCAACTTATAAGGAAGGTTACAACGTATATGGCATCGAAAGTGTTAAAATTTAGGGGATGA	CDS
IP_122927.1	RP	ETFDH	ATGCTCAGAACTGTGTACATTGTAAAACATGTGATATTAAAGATCCAAGTCAGAATATTAACTGGGTGGTACCTGAAGGTGGAGGAGGACCTGCTTACAATGGAATGTAAACTGCAGCTAGCCAGTTTCTTTCAAGTATGGCAAGCTAACGTTAAAATGTTTAGAGATTAA	CDS
IP_123278.1	RP	CLCN3	ATGGAGGCAGCATTAACAGTTCTACACATTTACTGGATCTTTTGGATGAACCAATTCCAGGTGTTGGTACATATGATGATTTCCATACTATTGATTGGGTGCGAGAAAAATGTAAAGACAGAGAAAGGCATAGACGGATCAACAGCAAAAAGAAAGAATCAGCATGGGAAATGA	CDS
IP_123477.1	MS	TENM3	ATGTCCCCGAAATTGCCATGGAAATGGAGAATGCGTTTCTGGAACTTGCCATTGTTTTCCAGGATTTCTGGGTCCGGATTGTTCAAGAGCCGCCTGTCCAGTGTTATGTAG	CDS
IP_123505.1	RP	DCTD	ATGGGATGCCAAATGGGTGCAGTGATGACGTGTTGCCTTGGAGAAGGACAGCAGAGAATAAGCTGGACACCAAATACCCGTACGTGTGCCATGCGGAGCTGA	CDS
IP_123580.1	RP	TRAPPC11	ATGCAGTCCATCGAGCTGTCTGGGACGCCTTCTGTGCAAATCGGAGAGCTGATCGAGTACCAATTTCTTTCAAGGTGCTCCCAGGTGACCATGAGTATCCCAAATGTAGACCCAAGAGAACTTCATATGAGTGGTACATTCCTAAAGGGATCTTAA	CDS
IP_123637.1	RP	IRF2	ATGCGGCTAGACATGGGTGGGATGTGGAAAAAGATGCACCACTCTTTAGAAACTGGGCAATCCATACAGGAAAGCATCAACCAGGAGTAG	CDS
IP_123645.1	RP	CASP3	ATGATGACATGGCGTGTCATAAAATACCAGTGGAGGCCGACTTCTTGTATGCATACTCCACAGCACCTGGTTATTATTCTTGGCGAAATTCAAAGGATGGCTCCTGGTTCATCCAGTCGCTTTGTGCCATGCTGA	CDS
IP_123649.1	RP	PRIMPOL	ATGGCATTAAAGGAGGAATTCGGCGTTGGAACTACTTTTTCCCAGAAGAATTACTGGTTTATGATATTTGTAAATATCGGTGGTGTGAAAACATTGGAAGAGCCCATAAGAGTAATAATATAA	CDS
IP_123764.1	RP	UFSP2	ATGACAATGGCTGGGGCTGTGCTTATCGATCTCTGCAGACTATCTGCTCTTGGTTCAAACATCAGGGATACACAGAGAGGTCCATTCCAACACACAGAGAAATTCAGCAGGCTCTAG	CDS
IP_125282.1	MS and RP	SDHA	ATGGCATGCCGTTTAGCAGAACTGAAGATGGGAAGATTTATCAGCGTGCATTTGGTGGACAGAGCCTCAAGTTTGGAAAGGGCGGGCAGGCCCATCGGTGCTGCTGTGTGGCTGATCGGACTGGCCACTCGCTATTGCACACCTTATATGGAAGGTCTCTGCGATATGATACCAGCTATTTTGTGGAGTATTTTGCCTTGGATCTCCTGA	CDS
IP_125955.1	RP	ANKH	ATGTGTGTGGGGTCAGCCCACGGCGGGGACTATGGTGAAATTCCCGGCGCTCACGCACTACTGGCCCCTGATCCGGTTCTTGGTGCCCCTGGGCATCACCAACATAGCCATCGACTTCGGGGAGCAGGCCTTGAACCGGGGCATTGCTGCTGTCAAGGAGGATGCAGTCGAGATGCTGGCCAGCTACGGGCTGGCGTACTCCCTCATGAAGTTCTTCACGGGTCCCATGAGTGA	5'UTR
IP_125980.1	MS	FBXL7	ATGTCCACCGAATCTCCCAGGATTTCAGAATGGAAGGGGCTCGTCCACCTCCTCGTCCTCCATCACCGGGGAGACGGTGGCCATGGTGCACTCCCCGCCCCCGACCCGCCTCACACACCCGCTCATCCGGCTCGCCTCCAGACCCCAGAAGGAGCAGGCCAGCATAGACCGGCTCCCGGACCACTCCATGGTGCAGATCTTCTCCTTCCTGCCCACCAACCAGCTGTGCCGCTGCGCGCGAGTGTGCCGCCGCTGGTACAACCTGGCCTGGGACCCGCGGCTCTGGAGGACTATCCGCCTGACGGGCGAGACCATCAACGTGGACCGCGCCCTCAAGGTGCTGACCCGCAGACTCTGCCAGGACACCCCCAACGTGTGTCTCATGCTGGAAACCGTAAC…	CDS
IP_126224.1	RP	ZFR	ATGTGTCTTGTACAGGAGCAGATGCGTATGCTGCCCACATTCGTGGTGCTAAGCATCAGAAAGTGGTTAAGTTACACACAAAACTTGGTAAACCCATTCCATCAACAGAACCAAATGTTGTTAGCCAAGCTACTTCTTCAACAGCTGTATCTGCTTCAAAGCCGACTGCCTCTCCTTCAAGCATTGCAGCAAACAATTGTACTGTGA	CDS
IP_126241.1	MS	NPR3	ATGCCATCCTCCTCTACGTCTTGGCTCTACATGAAGTACTCAGAGCTGGTTACAGCAAAAAGGATGGAGGGAAAATTATACAGCAGACTTGGAACAGAACATTTGAAGGTATCGCCGGGCAGGTGTCCATAG	CDS
IP_126390.1	RP	DNAJC21	ATGACAATTCTGAGGAAGAAATGGAAGATGCACCAAAACAAAAGCTTTCTAAAAAACAGAAGAAAAAGAAACAGAAACCAGCACAGAATTATGATGACAATTTCAATGTAA	CDS
IP_126590.1	RP	NIPBL	ATGAAGAAGAAGAAGAAGGGGAGGTTTCAGCTAGCACAAATGCTCGGAACAAAGCAATTACCTCACTGCTTGGAGGAGGCAGCCCTAAAAATAATACAGCAGCAGAGACAGAAGATGATGAAAGTGATGGGGAGGATAGAGGAGGAGGCACTTCAGGGGTGA	CDS
IP_126592.1	MS	NIPBL	ATGAAAAGCCAAAATATGCTGAAATCAGTTCAGATGAAGATAATGATAGTGATGAAGCTTTTGAATCCTCTAGGAAACGACATAAAAAAGATGATGATAAAGCTTGGGAATATGAAGAGCGTGACAGAAGAAGCTCTGGGGATCATAGGAGAAGTGGCCACTCTCATGAAGGAAGAAGGAGTTCAGGTGGTGGTCGTTATCGAAACCGAAGTCCGTCAGATTCTGACATGGAAGATTATTCTCCTCCTCCCAGCCTTAGTGAGGTTGCTAGGAAAATGA	CDS
IP_126636.1	RP	NUP155	ATGTGGGAGGAGATGGAGAAGAGATTGAAAGATTCTTTAAATTACATCAGGAAGACCAGGCTTGTGCAACTTGCCTTATTCTTGCTTGCTCCACTGCTGCCTGTGATAGAGAAGTATCTGCCTGGGCTACTCGGGCTTTCTTTAGGTATGGTGGTGAAGCACAGATGA	CDS
IP_126637.1	RP	NUP155	ATGAAGAAGCAGGACATCATTTTGAACAAATGCTTAAATTGTCACAGCGATCCAAGGATGAGCTCTTTAGTATTGCCCTTTATAATTGGCTAA	CDS
IP_126643.1	RP	NUP155	ATGCCGCTGTTGATGGCATTAGTTTACATTTACAGGATATCTGCCCACTTCTATATAGCACTGATGATGCAATTTGTTCTAAGGCAAATGAGCTTCTCCAGCGTTCCCGACAAGTTCAAAATAAGACTGAAAAAGAAAGAATGTTAA	CDS
IP_126652.1	RP	WDR70	ATGACTATGATGTTAAGTTTTGGGATTTTGCTGGAATGGATGCTTCTTTTAAGGCATTTCGATCCCTTCAGCCCTGTGAGTGCCATCAGATCAAGTCATTACAGTATAGTAACACAGGAGACATGA	CDS
IP_126654.1	RP	WDR70	ATGACAGTAATCCTCGGGAAGCCATTTTGCGTCATGCCAAAGCAGCAGAAGACAGCCCATATTGGGTTTCTCCAGCATATTCCAAGACTCAGCCCAAAACCATGTTTGCCCAAGTTGAATCTGATGATGAGGAAGCAAAGAATGAGCCAGAATGGAAAAAACGTAAAATTTGAAGAATCTCATTTGAGAGCTGTTTGCATGAGTGGGAGGGGTATGGGACAGGTTTGGGTTTTTTTTTTATGCTCATGA	CDS
IP_126694.1	MS	EGFLAM	ATGGTGTCCTCCTGTACAGCTATGACACAGGCAGCAAAGACTTCCTGTCCATCAACTTGGCAGGGGGCCACGTGGAGTTCCGCTTTGACTGTGGCTCTGGGACCGGTGTCCTCAGGAGTGAAGATCCCCTCACCCTGGGCAACTGGCACGAGCTTCGTGTATCTCGCACAGCAAAGAATGGAATCTTACAGGTGGATAAGCAGAAGATAG	CDS
IP_126858.1	RP	PRKAA1	ATGATGAAATTACAGAAGCCAAATCAGGGACTGCTACTCCACAGAGATCGGGATCAGTTAGCAACTATCGATCTTGCCAAAGGAGTGATTCAGATGCTGAGGCTCAAGGAAAATCCTCAGAAGTTTCTCTTACCTCATCTGTGA	CDS
IP_127040.1	RP	HMGCS1	ATGCAGAAGCTTGCTGGCCAAAAGATGTGGGAATTGTTGCCCTTGAGATCTATTTTCCTTCTCAATATGTTGATCAAGCAGAGTTGGAAAAATATGATGGTGTAG	CDS
IP_127075.1	RP	PAIP1	ATGGTTGTGTTACAACAGATGATGCTTTGCAAGAACTTGTGGAACTCATCTATCAACAGGCCACATCTATCCCAAATTTCTCTTATATGGGAGCTCGCCTGTGTAATTACCTGTCCCATCATCTGA	CDS
IP_127098.1	RP	MRPS30	ATGCTATTGCAAGCCTTTTTGCTTGGACTGGAGCACAAGCTATGTATCAAGGATTCTGGAGTGAAGCAGATGTTACTCGACCTTTTGTCTCCCAGGCTGTGA	CDS
IP_127132.1	RP	PARP8	ATGAATATTGTGTGGTTTGTGATGAGCCACATGTGTTTCAAAATGGCCCTATGCTTAGGCCTACCGTATGTGAACGGGAGCTGTGTGTGTTTGCTTTTCAAACCCTGGGAGTAA	CDS
IP_127164.1	MS and RP	PELO	ATGAGTATGTCAAGATGGGGGCTTACCACACCATCGAGCTGGAGCCCAACCGCCAGTTCACCCTGGCCAAGAAGCAGTGGGATAGTGTGGTACTGGAGCGCATCGAGCAGGCCTGTGACCCAGCCTGGAGCGCTGATGTGGCGGCTGTGGTCATGCAGGAAGGCCTCGCCCATATCTGCTTAG	CDS
IP_127173.1	RP	ITGA1	ATGTGCTCTATATTGCTGGACAGCCTCGGTACAATCATACAGGCCAGGTCATTATCTACAGGATGGAAGATGGAAACATCAAAATTCTCCAGACGCTCAGTGGAGAACAGATTGGTTCCTACTTTGGCAGTATTTTAA	CDS
IP_127175.1	RP	ITGA1	ATGGGCCTGTTCTTGATGATTCTCTACCAAACTCAGTACATGAATATATTCCCTTTGCCAAAGATTGTGGAAATAAGGAAAAATGTATCTCAGACCTCAGCCTGCATGTCGCCACCACTGAAAAGGACCTGCTGA	CDS
IP_127277.1	RP	GPX8	ATGTTCCGGGCCCAGAGCAAAGGTATTTGCAGTTTTGCTGTCTATAGTTCTATGCACAGTAACGCTATTTCTTCTACAACTAAAATTCCTCAAACCTAA	CDS
IP_127301.1	RP	DHX29	ATGATGCACTTCCTGAAGGATTCAGTCAGGAATTTGAAGAGCAGCAACCTAAAAGTAGGCCTAAATTTCAGTCTCCTCAAATACAAGCCACTATTTCACCTCCATTGCAACCTAAAACAAAAACATATGAAGAGGACCCTAAGAGTAAGCCAAAAAAGGAAGAAAAAAATATGGAAGTAA	CDS
IP_127310.1	RP	SKIV2L2	ATGAAGAAAGTGTGGTTATCTATTATAAGATTAGACAGCAGCTTGCCAAATTGGGTAAAGAAATTGAAGAATATATTCACAAACCAAAATACTGCTTACCTTTTCTACAACCAGGTCGTTTGGTAA	CDS
IP_127313.1	RP	SKIV2L2	ATGAGCTGTTCAGCGTGTTCGAGGGCGACTCGACCACTGCGGCGGGAACCAAAAAAGACAAGGAAAAGGACAAGGGGAAATGGAAGGGGCCTCCAGGGTCTGCAGACAAGGCAGGGAAACGTTTTGATGGTAAATTACAATCAGAATCAACTAATAATGGAAAAAATAAGAGAGATGTAG	CDS
IP_127440.1	RP	GPBP1	ATGATGACACAGAGACAAGTAGCAGTGATACATCAGATGACGACGATGTGTGAAGGATTTCCTAACAGCTTTAGAAATCTTAGTGTGATACATCTCTCATACAGTTTGGGGTGA	CDS
IP_127578.1	MS	ERCC8	ATGACCTTGAGAACTCCAGCAGACAATCTTATTACACATGTAAAGCAGTGTGTTCCATTGGCAGAGATCATCCTGATGTTCACAGATACAGTGTGGAGACTGTACAGTGGTATCCTCATGACACTGGCATGTTCACATCAAGCTCATTTGATAAAACTCTGA	CDS
IP_127615.1	RP	KIF2A	ATGGAGATACAAAAGGCAAAGAGATTGACCTGGAGAGCATCTTTTCACTTAACCCTGACCTTGTTCCTGATGAAGAAATTGAACCCAGTCCAGAAACACCTCCACCTCCAGCATCCTCAGCCAAAGTAA	CDS
IP_127617.1	RP	KIF2A	ATGGGCAGACTGGAAGTGGAAAAACTCATACTATGGGTGGTGACTTTTCAGGAAAGAACCAAGATTGTTCTAAAGGAATTTATGCATTAG	CDS
IP_127619.1	RP	KIF2A	ATGACCCTCCTTCAAGAGATAATAGAGTGGTTGGTTCAGCACGTGCACGGCCCAGTCAATTTCCTGAACAGTCTTCCTCTGCACAACAGAATGGTAGTGTTTCAGATATATCTCCAGTTCAAGCTGCAAAAAAGGAATTTGGACCCCCTTCACGTAGAAAATCTAATTGTGTGA	CDS
IP_127633.1	RP	IPO11	ATGTGTGTAGAGATAGACTGGAAAAGACCATCATTCTTTTTACTAAAGTGCTTTTGGACTTCTTGGATCAGCATCCTTTTTCATTTACTCCTCTAA	CDS
IP_127693.1	RP	CWC27	ATGGAGCGCCATTCAAAGATGAATTTCATTCACGGTTGCGTTTTAATCGGAGAGGACTGGTTGCCATGGCAAATGCTGGTTCTCATGATAATGGCAGCCAGTTTTTCTTCACACTGGGTCGAGCAGATGAACTTAACAATAAGCATACCATCTTTGGAAAGGTTACAGGGGATACAGTATATAACATGTTGCGACTGTCAGAAGTAG	CDS
IP_127948.1	RP	CDK7	ATGTCAGCTGCCAAGACCAAACTGTCCAGTGGAAACCTTAAAGGAGCAATCAAATCCAGCTTTGGCAATAAAAAGGAAAAGAACAGAGGCCTTAGAACAAGGAGGATTGCCCAAGAAACTAATTTTTTAAAGAGAACACTGGACAACATTTTACTACTGAGGGAAATAGCCAAAAAGGCAAATAATGGAAAAATAGTAAACATTAAGTAA	CDS
IP_127980.1	RP	TAF9	ATGATGCAAAAATTTATTCAAGCCATGCTAAGAAAGCTACTGTTGATGCAGATGATGTGCGATTGGCAATCCAGTGCCGCGCTGATCAGTCTTTTACCTCTCCTCCCCCAAGAGATTTTTTATTAG	CDS
IP_127987.1	RP	RAD17	ATGCTGTGCTGTCAAAATCAAAACGAAGAAAAAAACCTGATAGGGTTTTTGAAAATCAAGAGGTCCAAGCTATTGGTGGCAAAGATGTTTCTCTGTTTCTCTTCAGAGCTTTGGGGAAAATTCTATATTGTAAAAGAGCATCTTTAA	CDS
IP_128003.1	MS	MARVELD2	ATGGAGTGGAGTGTTCACCACCAGCCTCTCCAGCAAGACCAAACCACCGTTCGCCCCTCAACTCCTGCAAAGATCCCTACGGAGGGTCAGAAGGAACCTTTAGTTCCCGGAAAGAGGCTGACGCAGTGTTTCCCCGGGATCCCTATGGATCTCTAG	CDS
IP_128027.1	RP	OCLN	ATGACAAGTCCAATATTTTGTGGGACAAGGAACACATTTATGATGAGCAGCCCCCCAATGTCGAGGAGTGGGTTAAAAATGTGTCTGCAGGCACACAGGACGTGCCTTCACCCCCATCTGACTATGTGGAAAGAGTTGACAGTCCCATGGCATACTCTTCCAATGGCAAAGTGA	CDS
IP_128145.1	MS	MAP1B	ATGAATCTTCATTGTATTCTCAGGAATACTCTAAACCTGCTGATGTTACACCGCTCAACGGATTTTCTGAAGGATCAAAAACAGATGCCACTGATGGCAAGGATTACAATGCTTCAGCCTCTACCATATCACCACCCTCTTCCATGGAGGAAGACAAATTCAGCAGATCTGCTTTACGTGATGCTTACTGCTCTGAAGTGA	CDS
IP_128236.1	RP	BTF3	ATGGAAAAGCACCACTTGCTACTGGAGAGGATGATGATGATGAAGTTCCAGATCTTGTGGAGAATTTTGATGAGGCTTCCAAGAATGAGGCAAACTGAATTGAGTCAACTTCTGAAGATAAAACCTGAAGAAGTTACTGGGAGCTGCTATTTTATATTATGA	CDS
IP_128248.1	RP	UTP15	ATGCACGAACGAGTGAGAGTGTTCTCTCCGTTGAGCATGGGCAGCCAGTGGAGAGTGTCCTACTTTTCCCCTCTGGAGGTCTTCTGGTGTCAGCAGGAGGTCGTTATGTTAAAGTCTGGGACATGTTAA	CDS
IP_128359.1	RP	COL4A3BP	ATGCCATTGAACAGCACAAGACTGAATCTGGATATGGATCTGAATCCAGCTTGCGTCGACATGGCTCAATGGTGTCCCTGGTGTCTGGAGCAAGTGGCTACTCTGCAACATCCACCTCTTCATTCAAGAAAGGCCACAGTTTACGTGAGAAGTTGGCTGAAATGGAAACATTTAGAGACATCTTATGTAGACAAGTTGACACGCTACAGAAGTACTTTGATGCCTGTGCTGATGCTGTCTCTAAGGATGAACTTCAAAGGGATAAAGTGGTAG	CDS
IP_129251.1	MS	PCSK1	ATGAATGGGCAGCGGAGATCCCCGGGGGCCCGGAAGCAGCCTCGGCCATCGCCGAGGAGCTGGGCTATGACCTTTTGGGTCAGATTGGTTCACTTGAAAATCACTACTTATTCAAACATAAAAACCACCCCAGAAGGTCTCGAAGGAGTGCCTTTCATATCACTAAGAGATTATCTGATGATGATCGTGTGA	CDS
IP_129268.1	RP	CAST	ATGACCAAGACCCCATTGATGCTCTCTCAGGAGATCTGGACAGCTGTCCCTCCACTACAGAAACCTCACAGAACACAGCAAAGGATAAGTGCAAGAAGGCTGCTTCCAGCTCCAAAGCACCTAAGAATGGAGGTAAAGCGAAGGATTCAGCAAAGACAACAGAGGAAACTTCCAAGCCAAAAGATGACTAAAGAAATACAAGTTAAGGTATCTGGTATCTGCATGTAA	CDS
IP_129305.1	RP	ERAP1	ATGAGGATTATTTCAGCATACCGTATCCCCTACCCAAACAAGATCTTGCTGCTATTCCCGACTTTCAGTCTGGTGCTATGGAAAACTGGGGACTGA	CDS
IP_129342.1	RP	LNPEP	ATGGAGATAACTTCCGAACACAGAAGCTGTCTTTTATCATTAGAACAGTGGGTCGACATTTTCCTGGACACTTACTGGCATGGGATTTTGTCAAAGAGAACTGGAATAAGCTTGTACAGAAGTTCCCTCTGGGGTCCTATACCATACAAAATATTGTTGCTGGATCAACTTACCTGTTTTCAACAAAGACACATTTATCTGAGGTTCAGGCATTCTTTGAAAATCAGTCAGAGGCAACCTTCCGGCTTCGTTGTGTCCAGGAGGCTTTGGAAGTCATTCAGTTGA	CDS
IP_129345.1	RP	LNPEP	ATGTCACTGAAGGAAGAAATTATTCAAAATATCAATCGGTATCATTACTGGATAAGAAATCAGGTGTCATCAATCTTACAGAAGAAGTGCTGTGGGTCAAAGTGA	CDS
IP_129346.1	RP	LNPEP	ATGGGTTTTATGGCTTCTCCTACACAGATGAAAGTAATGAGAAAAAGTACTTTGCAGCAACTCAGTTTGAACCCCTGGCAGCAAGATCTGCTTTTCCTTGTTTTGATGAACCAGCATTTAAAGCCACTTTTATCATCAAGATCATAA	CDS
IP_129349.1	RP	LNPEP	ATGTGTTTCAACATGCTGTTGTCCTTTACCTGCATAATCACAGCTATGCATCTATTCAAAGTGATGATCTGTGGGATAGTTTTAATGAGGTCACAAACCAAACACTAG	CDS
IP_129391.1	RP	CHD1	ATGATCATCATAAAGACCGACATCAGGGAGATTCTTACAAAAAAAGTGATTCCAGGAAAAGACCCTATTCTTCTTTTAGTAATGGTAAAGACCATCGTGATTGGGATCACTACAAGCAAGACAGCAGATATTACAGTGACAGAGAGAAACACAGAAAACTGGATGATCACAGGAGTAGAGATCACAGGTCAAATTTGGAAGGAAGTTTAA	CDS
IP_129393.1	MS	CHD1	ATGAATTGCTTTCCCAGTTCAAGGTTGCCAACTTCTCAAATATGGATGAGGATGACATTGAGTTGGAACCTGAAAGAAATTCAAAGAATTGGGAGGAAATTATTCCAGAAGATCAAAGAAGACGATTAG	CDS
IP_129396.1	RP	CHD1	ATGGACACAGTGATGAAGAAAGTGTTAGAAACAGTAGTGGAGAATCAAGCCAGTCGGATGATGATTCTGGGTCAGCTTCAGGCTCTGGATCTGGTTCGAGTTCTGGAAGCAGTAGTGATGGAAGCAGTAGCCAGTCAGGTAGCAGTGACTCTGACTCCGGATCTGAATCAGGCAGTCAGTCAGAGTCTGAGTCAGACACTTCCCGAGAAAACAAAGTTCAAGCAAAACCACCGAAAGTTGATGGAGCTGAGTTTTGGAAATCTAGTCCTAGTATTCTGGCCGTTCAGAGATCTGCAATCCTCAAGAAGCAGCAACAGCAGCAGCAGCAACAACAACATCAAGCCTCATCTAATAGCGGATCAGAAGAGGATTCCTCTAGCAGTGAAGATTCCGATGACT…	CDS
IP_129568.1	MS	FER	ATGGGAAACCTGGTGAATATGTCCTTTCTGTATATTCTGATGGACAGAGGAGACATTTTATCATACAATATGTTGATAACATGTATCGATTCGAGGGCACTGGGTTTTCAAACATTCCTCAACTTATAG	CDS
IP_129579.1	RP	PJA2	ATGATGTTCCAAAGGAAAATTCCTCAGGTTCCAGTCCTTTGGATCAAGTTGATTCTTCTTTACCCAGTGAACCTATATTTGAAAAAAGTGAAACAGAAATTCCCACTTGTGGTTCAGCATTGA	CDS
IP_129580.1	RP	PJA2	ATGGCTGTGGAGATTATTACCAACTCTATGACAAAGATGAAGATAGTTCTGAATGCAGTGATGGGGAATGGTCTGCTTCTTTGCCTCATCGATTTTCTGGTACAGAAAAAGATCAATCCTCAAGTGATGAAAGCTGGGAGACTCTGCCAGGAAAAGATGAGAATGAACCTGAGCTACAAAGTGATAGCAGTGGCCCTGAAGAAGAAAACCAAGAATTATCTCTTCAGGAAGGGGAACAGACATCCTTGGAAGAGGGAGAAATTCCTTGGTTACAGTACAATGAAGTCAATGAAAGCAGCAGTGATGAGGGAAATGAACCTGCCAATGAATTTGCACAGCCAGCTTTCATGTTGGATGGTAACAATAACCTGGAGGATGACTCCAGTGTGA	CDS
IP_129581.1	RP	PJA2	ATGGAATTGCATTGGTTCATACAGACTCTTATGATCCAGATGGCAAACATGGAGAAGATAATGACCATCTTCAACTTTCTGCAGAAGTCGTGGAAGGTAGTAGATACCAGGAATCATTAG	CDS
IP_129619.1	RP	SLC25A46	ATGCTTATTTTCCAGAACTTATTGCTAACTTTGCTGCCAGTCTTTGTTCTGACGTTATACTTTACCCATTGGAAACAGTTTTGCACCGCCTTCACATTCAAGGAACACGCACAATAA	CDS
IP_129638.1	RP	WDR36	ATGTATATAACATGCAGTCTGGCATACATCGAGGAAGTTTTGGCAAGGATCAAGCTCACAAGGGATCTGTTAGAGGTGTCGCAGTGGATGGATTAA	CDS
IP_129741.1	RP	DCP2	ATGCACTGTTCCTGCTGTGGGTCCTCATCATGGAGACCAAACGGGTGGAGATTCCCGGCAGCGTCCTGGACGATCTCTGCAGCCGATTTATTTTGCATATTCCCAGCGAGGAAAGAGACAATGCAATCCGAGTGTGTTTTCAGATTGAACTTGCCCATTGGTTTTACTTGGATTTCTACATGCAGAACACACCAGGATTACCTCAGTGTGGGATAA	5'UTR
IP_129955.1	RP	DMXL1	ATGAAGAAAATACAAAGCCTAGAGTTATTGACCTTTCACAGTACAGTCCGACTTACTTTGGACCTGAGCATGCTCAGGTTCTTTCTGGCCACTTACTTCATTCTAGTTTACCAGGACTCAGCCGGATGGAGCAGATGTCTTTGA	CDS
IP_129956.1	RP	DMXL1	ATGTTCACAGGAACACTCCACTGCATGCCAATGCACTTTGCCACTTTCATATTGCAGCCAGCATCAACCCAGCCACAGACATTCCACTTCTTCCATCTATTACATCTCTGA	CDS
IP_129983.1	RP	TNFAIP8	ATGAATGCAGAGAGATGCTGCACCAAATCATTCAGCGCCACCTCACTGCCAAGTCACATGGACGGGTTAATAATGTGTTTGATCATTTTTCAGATTGTGAATTTTTGGCTGCCTTGTATAATCCTTTTGGGAATTTTAAACCCCACTTACAAAAACTATGTGATGGTATCAACAAAATGTTGGATGAAGAGAACATATGAGCACATGAGTTAA	CDS
IP_129996.1	RP	HSD17B4	ATGTGGCACCTCTTGTCCTTTGGCTTTGTCACGAGAGTTGTGAGGAGAATGGTGGCTTGTTTGAGGTTGGAGCAGGATGGATTGGAAAATTACGCTGGGAGCGGACTCTTGGAGCTATTGTAA	CDS
IP_129997.1	RP	HSD17B4	ATGGCAACTTTGGCCAGGCCAATTATAGTGCTGCAAAGTTGGGTCTTCTGGGCCTTGCAAATTCTCTTGCAATTGAAGGCAGGAAAAGCAACATTCATTGTAACACCATTGCTCCTAATGCGGGATCACGGATGA	CDS
IP_130067.1	RP	SNX2	ATGAATCGGATGCATGGTTTGAAGAAAAGCAGCAGCAATTTGAGAATCTGGATCAGCAACTTAGGAAACTTCATGTCAGTGTTGAAGCCTTGGTCTGTCATAGAAAAGAACTTTCAGCCAACACAGCTGCCTTTGCTAAAAGTGCTGCCATGTTAG	CDS
IP_130214.1	RP	PHAX	ATGATGATACATCACGAGAAACTTTTGCAAGTGACACGAATGAGGCCTTGGCCTCTCTTGATGAGTCACAGGAAGGACATGCAGAAGCCAAGTTGGAGGCAGAGGAAGCCATTGAAGTTGATCATTCTCATGATTTGGACATCTTTTAAGTACATTTTCAACAGTTTGAGGACTAAGCCTTTCTAA	CDS
IP_130232.1	RP	MARCH3	ATGAATGTGGAAGCCATTAGCAGAGTAATTGCTGTCTGTTACCATGACAACCAGCCGCTGCAGTCACCTGCCCGAAGTCCTGCCAGACTGCACCAGCTCAGCTGCACCCGTGGTGAAGACGGTGGAGGATTGTGGCAGCCTAGTGAATGGGCAGCCGCAGTATGTCATGCAAGTTTCAGCCAAGGACGGGCAGCTGCTGTCAACAGTAGTGCGGACTCTTGCCACCCAGAGCCCCTTCAATGA	5'UTR
IP_130307.1	RP	SLC12A2	ATGGATTGTGGGTCAAGCTGGAATAGGTCTATCAGTCCTTGTAATAATGATGGCCACTGTTGTGACAACTATCACAGGATTGTCTACTTCAGCAATAGCAACTAA	CDS
IP_130411.1	RP	RAPGEF6	ATGACGAAGAGGAAGATGAAGAGATTGATCGAACAGATCCATTGCAGGGGCGAGATCTTGTTCGAGAATGTCTTGAAAAAGAACCTGCAGACAAAACTGATGATGACATTGAACAATTGCTGGAGTTTATGCACCAGCTCCCTGCATTTGCAAACATGA	CDS
IP_130416.1	RP	RAPGEF6	ATGAGAGATACAGTGGCAATCAGGTTCTCTTTTGTTCAGAAACGATTGCCAGATGTTGGTATATCCTACTTTCTGGATCTGTGCTTGTGA	CDS
IP_130437.1	RP	FNIP1	ATGTTTTGTTTGACTCCAGTGTTAAGAGAAGAAATGAGGACATATCAGTATCGAAACTCGGCAGTGATGCTCAAGTTAAAGTCTTTGGGAAATGCTGCCAACTGA	CDS
IP_130551.1	RP	KIF3A	ATGATGAAACTATCAGTACATTACGGTATGCCAATCGTGCTAAGAATATTAAAAATAAAGCTAGAATTAATGAAGATCCAAAGGATGCTTTGCTGCGTCAGTTCCAGAAAGAAATAG	CDS
IP_130552.1	RP	KIF3A	ATGATGATGAAGAGGGTGAGGTTGGAGAAGATGGAGAGAAAAGGAAAAAAAGAAGGGGCAGTAGCAGCAGCAGTAGTTCAGACTCCACATGTTCTGTCATAG	CDS
IP_130676.1	RP	HSPA4	ATGCAAAGAACACAGTCCAAGGATTTAAAAGATTCCATGGCCGAGCATTCTCTGATCCATTTGTGGAGGCAGAAAAATCTAACCTTGCATATGATATTGTGCAGTTGCCTACAGGATTAA	CDS
IP_130677.1	RP	HSPA4	ATGCTGCTCCTTTCTCTAAAGTTCTTACATTTTATAGAAAGGAACCTTTCACTCTTGAGGCCTACTACAGCTCTCCTCAGGATTTGCCCTATCCAGATCCTGCTATAG	CDS
IP_130678.1	RP	HSPA4	ATGCAGAGCAGAATGGACCAGTGGATGGACAAGGAGACAACCCAGGCCCCCAGGCTGCTGAGCAGGGTACAGACACAGCTGTGCCTTCGGATTCAGACAAGAAGCTTCCTGAAATGGACATTGATTGATTCCAACACTTGTTTCTATTAA	CDS
IP_130679.1	RP	HSPA4	ATGAGGAGCCAATGGAAACAGATCAGAATGCAAAGGAGGAAGAGAAGATGCAAGTGGACCAGGAGGAACCACATGTTGAAGAGCAACAGCAGCAGACACCAGCAGAAAATAAGGCAGAGTCTGAAGAAATGGAGACCTCTCAAGCTGGATCCAAGGATAAAAAGATGGACCAACCACCCCAAGCCAAGAAGGCAAAAGTGA	CDS
IP_130680.1	RP	HSPA4	ATGCTGATGAAGCTGTCACTCGAGGCTGTGCATTGCAGTGTGCCATCTTATCGCCTGCTTTCAAAGTCAGAGAATTTTCTATCACTGATGTAG	CDS
IP_130761.1	RP	PPP2CA	ATGGAAATGCAAATGTTTGGAAATATTTTACAGATCTTTTTGACTATCTTCCTCTCACTGCCTTGGTGGATGGGCAGATCTTCTGTCTACATGGTGGTCTCTCGCCATCTATAG	CDS
IP_130763.1	RP	PPP2CA	ATGTGCATGGGCAATTTCATGATCTCATGGAACTGTTTAGAATTGGTGGCAAATCACCAGATACAAATTACTTGTTTATGGGAGATTATGTTGACAGAGGATATTATTCAGTTGAAACAGTTACACTGCTTGTAG	CDS
IP_130784.1	RP	UBE2B	ATGAACCGAATCCTAACAGTCCAGCCAATAGCCAGGCAGCACAGCTTTATCAGGAAAACAAACGAGAATATGAGAAAAGAGTTTCGGCCATTGTTGAACAAAGCTGGAATGATTCATAATAGACAACTGGTCTGTTAA	CDS
IP_130866.1	RP	DDX46	ATGACAGACGGTCTAGAAGTAGAGATAGAGATAGGAGGAGAGAGAGGTCTCGTAGCAGGGATAAAAGAAGATCTCGGTCAAGGGACAGGAAGCGTCTGA	CDS
IP_130869.1	RP	DDX46	ATGACTTCCCACAGACTGCTAGGTGGAAAGTTACCTCTAAGGAAGCTCTGCAGAGAATCAGTGAATACTCTGAAGCCGCAATTACAATCAGAGGAACCTACTTCCCTCCTGGCAAAGAACCCAAGGAAGGCGAGCGGAAGATTTACTTGGCAATTGAAAGTGCCAATGAACTGGCTGTGCAGAAAGCAAAGGCAGAAATCACCAGGCTCATAA	CDS
IP_130872.1	RP	DDX46	ATGAAACAGAACAAGCTTTGGCTAATGAGAGGAAGAAGTTACAAAAAGCAGCTCTTGGTCTACAAGATTCAGATGATGAGGATGCTGCAGTTGATATTGATGAGCAAATTGAAAGCATGTTTAATTCAAAGAAGAGAGTAA	CDS
IP_131007.1	RP	TGFBI	ATGCAACCAACGGGGTGGTGCACCTCATCGATAAGGTCATCTCCACCATCACCAACAACATCCAGCAGATCATTGAGATCGAGGACACCTTTGAGACCCTTCGGGCTGCTGTGGCTGCATCAGGGCTCAACACGATGCTTGAAGGTAACGGCCAGTACACGCTTTTGGCCCCGACCAATGAGGCCTTCGAGAAGATCCCTAGTGAGACTTTGA	CDS
IP_131158.1	RP	BRD8	ATGATGGCTTCAGCATACACAATGCTACACTGCAGTCACACACACTGGCAGACTCCATCCCCAGCAGCCCTGCTTCTTCACAGTTCTCTGTCTGTAGTGAGGATCAGGAAGCTATTCAGGCACAGAAAATTTGGAAGAAAGCCATCATGCTTGTATGGAGAGCTGCAGCTAATCATAGGTATGCCAATGTCTTCCTGCAGCCTGTTACAGATGACATAG	CDS
IP_131176.1	RP	KIF20A	ATGTACTCAAAGGGCAGAACTGGCTCATCTATACATATGGAGTCACTAACTCAGGGAAAACCCACACGATTCAAGGTACCATCAAGGATGGAGGGATTCTCCCCCGGTCCCTGGCGCTGA	CDS
IP_131178.1	MS	KIF20A	ATGCCCGGATCCTACGCTCACGGCGTTCCCCTTTACTCAAATCTGGGCCTTTTGGCAAAAAGTACTAAGGCTGTGGGGAAAGAGAAGAGCAGTCATGGCCCTGAGGTGGGTCAGCTACTCTCCTGA	CDS
IP_131193.1	RP	CDC23	ATGTGGGCTTCTCTAAGAGCTCGTATATTGTTTCCCAAATTGCAGTTGCCTATCACAATATCAGAGATATTGACAAAGCCCTCTCCATTTTTAATGAGCTAA	CDS
IP_131194.1	RP	CDC23	ATGCCATTGAGGTCAACAAACGGGACTACAGAGCTTGGTATGGCCTCGGGCAGACCTATGAAATCCTTAAGATGCCATTTTACTGCCTTTATTATTATAGACGGGCCCACCAGCTTCGACCCAATGATTCTCGCATGCTGGTTGCTTTAG	CDS
IP_131216.1	RP	FAM53C	ATGGTGCTAGAATGGTGCTGCAGTGGCAGAAGACGGCTCACAAGTGAGGTCTGGAAGAACAACAGGGAAGACATCCATCATTTGCTCCAAAGTGTGCAAGTCAAATCCTGGGGAGAATCATGA	5'UTR
IP_131217.1	RP	FAM53C	ATGCAGACATCTCCAACTGTGGGAACTCTTTCCAGCTTGTGTCTGAAGGTGCTTCCTGGAGGGGCCTGCCCCACTGTTCCTGTGCTGAGTTCCAGGACAGCCTCAACTTCAGCTACCATCCCTCAGGCCTGA	CDS
IP_131236.1	RP	KDM3B	ATGATGGAAAAGAGAAGCCAGGTGCTTTATGGCACATCTATGCAGCCAAGGATGCAGAGAAGATCCGGGAGCTGCTCCGAAAGGTTGGAGAAGAACAAGGCCAAGAGAACCCCCCTGATCATGACCCAATTCATGACCAAAGTTGGTACCTGGACCAGACCCTCCGTAAGCGACTCTATGAGGAGTATGGCGTGCAAGGCTGGGCTATTGTGCAGTTCCTAG	CDS
IP_131276.1	RP	HSPA9	ATGATATTGAAAATATGGTTAAAAATGCAGAGAAATATGCTGAAGAAGACCGGCGAAAGAAGGAACGAGTTGAAGCAGTTAATATGGCTGAAGGAATCATTCACGACACAGAAACCAAGATGGAAGAATTCAAGGACCAATTACCTGCTGATGAGTGCAACAAGCTGA	CDS
IP_131278.1	RP	HSPA9	ATGGCCTTAGTCATGAGGCTTTTAGACTTGTTTCAAGGCGGGATTATGCATCAGAAGCAATCAAGGGAGCAGTTGTTGGTATTGATTTGGGTACTACCAACTCCTGCGTGGCAGTTATGGAAGGTAAACAAGCAAAGGTGCTGGAGAATGCCGAAGGTGCCAGAACCACCCCTTCAGTTGTGGCCTTTACAGCAGATGGTGAGCGACTTGTTGGAATGCCGGCCAAGCGACAGGCTGTCACCAACCCAAACAATACATTTTATGCTACCAAGCGTCTCATTGGCCGGCGATATGATGATCCTGAAGTACAGAAAGACATTAAAAATGTTCCCTTTAAAATTGTCCGTGCCTCCAATGGTGATGCCTGGGTTGAGGCTCATGGGAAATTGTATTCTCCGA…	CDS
IP_131283.1	RP	CTNNA1	ATGCAGCCCAGGCCACTGCCTCAGACGATGCCTCACAGCACCAGGGTGGAGGAGGAGGAGAACTGGCATATGCACTCAATAACTTTGACAAACAAATCATTGTGGACCCCTTGA	CDS
IP_131284.1	RP	CTNNA1	ATGTTTTGGCTGCATCTGTTGAACAAGCAACTGAGAATTTCTTGGAGAAGGGGGATAAAATTGCGAAGGAGAGCCAGTTTCTCAAGGAGGAGCTTGTGGCTGCTGTAG	CDS
IP_131287.1	RP	CTNNA1	ATGACCGTCGTGAGCGAATTGTGGCAGAGTGTAATGCTGTCCGCCAGGCCCTGCAGGACCTGCTTTCGGAGTACATGGGCAATGCTGGACGTAAAGAAAGAAGTGATGCACTCAATTCTGCAATAG	CDS
IP_131316.1	RP	MATR3	ATGGTAGAGATGGCAGATCTGCTACACGGGAGCCACCATACAGAGTACCTAGGGATGATTGGGAAGAAAAAAGGCACTTTAGAAGAGATAGTTTTGATGATCGTGGTCCTAGTCTCAACCCAGTGCTTGATTATGACCATGGAAGTCGTTCTCAAGAATCTGGTTATTATGACAGAATGGATTATGAAGATGACAGATTAA	CDS
IP_131317.1	RP	MATR3	ATGGAGAAAGGTGTAGGGATGATTCTTTTTTTGGTGAGACCTCGCATAACTATCATAAATTTGACAGTGAGTATGAGAGAATGGGACGTGGTCCTGGCCCCTTACAAGAGAGATCTCTCTTTGAGAAAAAGAGAGGCGCTCCTCCAAGTAGCAATATTGAAGACTTCCATGGACTCTTACCGAAGGGTTATCCCCATCTGTGCTCTATATGTGATTTGCCAGTTCATTCTAATAAGGAGTGGAGTCAACATATCAATGGAGCAAGTCACAGTCGTCGATGCCAGCTTCTTCTTGAAATCTACCCAGAATGGAATCCTGACAATGATACAGGACACACAATGGGTGATCCATTCATGTTGCAGCAGTCTACAAATCCAGCACCAGGAATTCTGGGACCTC…	CDS
IP_131319.1	RP	MATR3	ATGGAAGTGCTTCAGCAGCAGCAAAGAAAAAGCTTAAAAAGGTGGACAAGATCGAGGAACTTGATCAAGAAAACGAAGCAGCGTTGGAAAATGGAATTAAAAATGAGGAAAACACAGAACCAGGTGCTGAATCTTCTGAGAACGCTGATGATCCCAACAAAGATACAAGTGAAAACGCAGATGGTCAAAGTGATGAGAACAAGGACGACTATACAATCCCAGATGAGTATAGAATTGGACCATATCAGCCCAATGTTCCTGTTGGTATAG	CDS
IP_131320.1	RP	MATR3	ATGGCAAAGAATCTCCAAGTGATAAGAAATCCAAAACTGATGGTTCCCAGAAGACTGAGAGTTCAACCGAAGGTAAAGAACAAGAAGAGAAGTCCGGTGAAGATGGTGAGAAAGACACAAAGGATGACCAGACAGAGCAGGAACCTAATATGCTTCTTGAATCTGAAGATGAGCTACTTGTAG	CDS
IP_131326.1	RP	PAIP2	ATGAATGGTTTATTCCAGCTCGAGATCTCCCACAAACTATGGACCAAATCCAAGACCAGTTTAATGACCTTGTTATCAGTGATGGCTCTTCTCTGGAAGATCTTGTGGTCAAGAGCAATCTGA	CDS
IP_131370.1	RP	DNAJC18	ATGAGTGGACTCAGACCCGGCAGGGTGAGGGGAACTCCACGTATAGTGAGGAACAGCTGCTTGGGGTACAAAGGATCAAGAAATGCAGAAATTACTATGAAATTCTGGGAGTTTCTCGAGATGCTAGTGACGAAGAGCTTAAGAAAGCTTACAGAAAACTCGCCCTGA	CDS
IP_131498.1	RP	SRA1	ATGGATCCCCCAGAGTCCCCGCATCAGAGACTTCTCCTGGGCCTCCCCCAATGGGGCCTCCACCTCCTTCAAGTAAGGCTCCCAGGTCCCCACCTGTGGGGAGTGGTCCTGCCTCTGGCGTGGAGCCCACAAGTTTCCCAGTCGAGTCTGAGGCTGTGA	CDS
IP_131550.1	MS	IK	ATGAGGATCCTGAAAATAAAATTGAATTTAAAACACGTCTGGGCCGCAATGTTTACCGAATGCTTTTTAAGAGCAAAGCATATGAGCGGAATGAGTTGTTCCTGCCGGGCCGCATGGCCTATGTGGTAG	CDS
IP_131555.1	RP	WDR55	ATGGGAGCGACGAGGAGGACCCAGACTCCATGGAAGCCCCAACCCGGATCCGGGACACTCCGGAAGACATCGTGCTGGAAGCTCCGGCTAGTGGGCTGGCGTTCCATCCGGCCCGTGACCTACTGGCTGCAGGGGACGTGGACGGGGACGTGTTCGTCTTTTCCTACTCTTGCCAAGAGGGAGAAACCAAGGAGCTCTGGTCATCAGGTCACCATCTCAAGGCCTGCCGAGCTGTGGCCTTCTCTGAAGATGGGCAGAAGCTCATTACTGTCTCCAAGGACAAAGCCATCCATGTTCTAG	CDS
IP_131600.1	RP	ZMAT2	ATGAATATGAGAAACTCGCCGAGAAGAGGCTCACGGAAGAGAGAGAAAAGAAAGATGGAAAACCAGTGCAGCCTGTCAAGCGAGAGCTTTTACGGCATAGGGACTACAAGGTGGACTTGGAATCCAAGCTTGGGAAGACAATTGTCATTACCAAGACAACCCCTCAATCTGAGATGGGAGGATATTACTGCAATGTCTGTGACTGTGTGGTGA	CDS
IP_132055.1	RP	KIAA0141	ATGGGCCTCAGACTACCTCCTCCACTTTGCTGGTTCCTGTGCCTAACCTCGACAGGTCAGGTCCCCATGGCCCAGGCACGAGCGGGGGTCCAAGGTCCCATGGATGGAAGGATGCCTTCCAATGGATGTCTTCCCGTGTCTCCCCGAACACCCTATGGGATGCCATATCTTGGGGCACTCTGGCCGTGCTGGCCCTGCAGCTGGCAAGGCAGATCCACTTCCAGGCATCCCTGCCAGCAGGACCTCAGCGGGTAG	CDS
IP_132094.1	RP	RNF14	ATGAATTGCTGGCCCTGGCAAGTATTTACGATGGAGATGAATTTAGAAAAGCAGAGTCTGTCCAAGGTGGAGAAACCAGGATCTATTTGGATTTGCCACAGAATTTCAAGATATTTGTGA	CDS
IP_132253.1	RP	YIPF5	ATGAAACTGATTTGGCAGGTCCAATGGTTTTTTGCCTTGCTTTTGGAGCCACATTGCTACTGGCTGGCAAAATCCAGTTTGGCTATGTATACGGGATCAGTGCAATTGGATGTCTAG	CDS
IP_132254.1	RP	YIPF5	ATGATCAGTCACAGCAGTCCTATGATTATGGAGGAAGTGGAGGACCCTATAGCAAACAGTATGCTGGCTATGACTATTCGCAGCAAGGCAGATTTGTCCCTCCAGACATGA	CDS
IP_132335.1	RP	RBM27	ATGGCAGAAAAAAGAAATATCCTAGTCCCCAGAAGACTCGTTCAGAATCTAGTGAACGAAGGACACGTGAGAAAAAAAGAGAAGACGGGAAATGGAGAGACTATGACCGGTACTATGAGCGGAATGAATTGTACCGTGAGAAGTATGACTGGAGAAGAGGCAGGAGTAAGAGTCGGAGTAAGAGTCGAGGCCTGA	CDS
IP_132354.1	RP	TCERG1	ATGAGTTTGTGGCCGCTGCTAGGAAGAAAGAGAAAGAAGATTCGAAGACCAGAGGTGAGAAGATTAAATCGGATTTCTTTGAACTATTATCTAATCATCACTTGGACAGTCAGTCTCGATGGAGCAAAGTAA	CDS
IP_132356.1	RP	TCERG1	ATGGGAAGGTTTATTATTATAATGCTCGGACACGTGAATCTGCATGGACCAAGCCAGATGGAGTTAAGGTTATTCAGCAATCAGAACTGA	CDS
IP_132357.1	RP	TCERG1	ATGAAGATGAGCCTGTTAAAGCAAAAAAACGGAAGAGAGACGATAATAAAGACATTGACTCAGAGAAAGAAGCTGCCATGGAAGCTGAAATTAAAGCTGCCCGAGAAAGGGCCATTGTCCCTCTGGAGGCTCGAATGA	CDS
IP_132358.1	RP	TCERG1	ATGTGTCATGGTCTGATACTCGTAGGACCCTCCGAAAAGATCACCGCTGGGAATCTGGATCCTTATTGGAAAGAGAGGAGAAAGAGAAGCTTTTTAATGAACACATTGAAGCACTTACCAAAAAAAAGAGAGAGCACTTTAGGCAACTTCTGGATGAAACTTCTGCAATTACCTTAA	CDS
IP_132612.1	MS	ABLIM3	ATGGTGATTTGTCTACAGCAACCAAGAGCAAAACAAGTGAAGACATCAGCCAGACCTCCAAGTACAGTCCCATCTACTCGCCAGACCCCTACTATGCTTCGGAGTCTGAGTACTGGACCTACCATGGGTCCCCCAAAGTGCCCCGAGCCAGAAGGTTCTCGTCTGGAGGAGAGGAGGATGATTTTGACCGCAGCATGCACAAGCTCCAAAGTGGAATTGGCCGGCTGA	CDS
IP_132676.1	MS	ARHGEF37	ATGGAGCCGACGAGCCATCCTCCAGGTCAGGGAGTCCGGACAGGGAAGGTAGGGCCTCTGAGGACAGATCGCTGCTTCATCAGAGGCTGGCTGTCCGGGAGCTCATCGACACTGAGGTCTCCTACTTGCACATGCTCCAGCTCTGTGCCTCTGACATCAGGAGCCGCCTCCAGCAGTTGCCGCAGGGAGATCTGGATGTCCTGTTCTCAAACATTGATGATATCATCAAAGTGA	CDS
IP_132709.1	RP	PPARGC1B	ATGAGATCCGTGCCAGCCTCACCAAACACTTTGGGCTGCTGGAGACCGCCCTGGAGGAGGAAGACCTGGCCTCCTGCAAGAGCCCTGAGTATGACACTGTCTTTGAAGACAGCAGCAGCAGCAGCGGCGAGAGCAGCTTCCTCCCAGAGGAGGAAGAGGAAGAAGGGGAGGAGGAGGAGGAGGACGATGAAGAAGAGGACTCAGGGGTCAGCCCCACTTGCTCTGACCACTGCCCCTACCAGAGCCCACCAAGCAAGGCCAACCGGCAGCTCTGTTCCCGCAGCCGCTCAAGCTCTGGCTCTTCACCCTGCCACTCCTGGTCACCAGCCACTCGAAGGAACTTCAGATGTGAGAGCAGAGGGCCGTGTTCAGACAGAACGCCAAGCATCCGGCACGCCA…	CDS
IP_132769.1	RP	HMGXB3	ATGCGCGCGCGAGCCCTCGCCTCCACTTCCTTGTTGCTGCTGTCACGACTGGAGCCGCCTCTCGCCGACAGCGGGGAGCGCGAGTGCGCCAGCCATCCCCCTCGTCCAGCCGCCGGGCCAAGCGCCTCCGGGAATGTGAGCGGCGCAGCTTGCACGCTCCTCCGGCCATGGACGCATCATATGATGGTACTGAGGTAA	5'UTR
IP_132895.1	RP	RPS14	ATGTATTTGGTGTCTGCCATATCTTTGCATCCTTCAATGACACTTTTGTCCATGTCACTGATCTTTCTGGCAAGGAAACCATCTGCCGTGTGA	CDS
IP_132948.1	RP	SYNPO	ATGTCATCGAGTCTTCAAGCCACACGCCAGAGCTGGCCCGCTGCCCATCACCTACCATGTCCCTGCCTTCCTCCTGGAAATACCCCACTAACGCCCCCGGGGCCTTCCGAGTGGCATCCCGAAGCCCAGCCCGGACCCCGCCTGCCTCCCTCTACCATGGCTACCTGCCTGAGAACGGGGTCCTGCGCCCAGAGCCCACCAAGCAGCCGCCATACCAGCTGCGCCCCTCGCTCTTTGTCCTCTCACCTATCAAGGAGCCTGCCAAGGTCTCACCAAGAGCTGCCTCGCCCGCCAAGCCCAGCTCCTTGGACCTGGTGCCCAACCTGCCCAAGGGGGCTCTCCCTCCATCTCCTGCCCTGCCTCGGCCCTCGCGCTCCTCACCGGGCCTCTACACCTCCC…	CDS
IP_133070.1	RP	ANXA6	ATGCCAAAGAAATTAAAGATGCCATCTCGGGCATTGGCACTGATGAGAAGTGCCTCATTGAGATCTTGGCTTCCCGGACCAATGAGCAGATGCACCAGCTGGTGGCAGCATACAAAGATGCCTACGAGCGGGACCTGGAGGCTGACATCATCGGCGACACCTCTGGCCACTTCCAGAAGATGCTTGTGGTCCTGCTCCAGGGAACCAGGGAGGAGGATGACGTAG	CDS
IP_133071.1	RP	ANXA6	ATGACGTGGAGCACACCATCAAGAAGGAGATGTCTGGGGATGTCAGGGATGCATTTGTGGCCATTGTTCAAAGTGTCAAGAACAAGCCTCTCTTCTTTGCCGACAAACTTTACAAATCCATGA	CDS
IP_133182.1	RP	SPARC	ATGATGGTGCAGAGGAAACCGAAGAGGAGGTGGTGGCGGAAAATCCCTGCCAGAACCACCACTGCAAACACGGCAAGGTGTGCGAGCTGGATGAGAACAACACCCCCATGTGCGTGTGCCAGGACCCCACCAGCTGCCCAGCCCCCATTGGCGAGTTTGAGAAGGTGTGCAGCAATGACAACAAGACCTTCGACTCTTCCTGCCACTTCTTTGCCACAAAGTGCACCCTGGAGGGCACCAAGAAGGGCCACAAGCTCCACCTGGACTACATCGGGCCTTGCAAATACATCCCCCCTTGCCTGGACTCTGAGCTGA	CDS
IP_133183.1	RP	SPARC	ATGAGAATGAGAAGCGCCTGGAGGCAGGAGACCACCCCGTGGAGCTGCTGGCCCGGGACTTCGAGAAGAACTATAACATGTACATCTTCCCTGTACACTGGCAGTTCGGCCAGCTGGACCAGCACCCCATTGACGGGTACCTCTCCCACACCGAGCTGGCTCCACTGCGTGCTCCCCTCATCCCCATGGAGCATTGCACCACCCGCTTTTTCGAGACCTGTGACCTGGACAATGACAAGTACATCGCCCTGGATGAGTGGGCCGGCTGCTTCGGCATCAAGCAGAAGGATATCGACAAGGATCTTGTGA	CDS
IP_133199.1	RP	G3BP1	ATGGAAAGAACTCTTCTTATGTCCATGGGGGATTGGATTCAAATGGAAAGCCAGCAGATGCAGTCTACGGACAGAAAGAAATCCACAGGAAAGTGA	CDS
IP_133281.1	RP	GALNT10	ATGACGACTTTCGGTACGAGACACAGGCAGGGGATGCCATGCGGGGAGCCTTTGACTGGGAGATGTACTACAAGCGGATCCCGATCCCTCCAGAACTGCAGAAAGCTGACCCCAGCGACCCATTTGAGTCTCCCGTGA	CDS
IP_133335.1	RP	LARP1	ATGGGGCTGGTGGGGCGCGGGCTTCCTTCCGTGGCCGTGGACGGGGGCGTGGTCGCGGCCGGGGACGCGGCCGGGGTGGCACTCGAACCCATTTTGACTACCAGTTTGGCTACCGAAAGTTTGATGGTGTGGAGGGGCCTCGTACGCCCAAGTACATGA	CDS
IP_133337.1	RP	LARP1	ATGAGCAAGAGGAACTGGATTTTCTGTTTGACGAGGAGATGGAGCAGATGGATGGGCGGAAGAACACCTTCACTGCCTGGTCTGATGAGGAATCTGACTATGAGATTGATGACAGGGATGTCAACAAGATCCTCATTGTCACCCAGACACCACATTACATGCGCCGGCACCCAGGGGGGGACCGCACAGGCAACCACACCTCGCGTGCCAAGATGA	CDS
IP_133490.1	RP	CYFIP2	ATGGAAATGTCAGTAACATTTACAAACTGGATGCCAAGAAGAGAATTAATCTTAGCAAAATTGATAAATTCTTTAAGCAGCTGCAGGTGGTGCCCCTTTTCGGCGACATGCAGATAG	CDS
IP_133496.1	MS and RP	CYFIP2	ATGGGTCCACTAACCGTTTTGTGCGGACTGCCATTCCTTTCACCCAAGAACCACAACGAGACAAACCTGCCAACGTCCAGCCTTATTACCTCTATGGATCCAAGCCTCTCAACATTGCCTACAGCCACATCTACAGCTCCTACAGGAATTTCGTGGGGCCACCTCATTTCAAGACTATCTGCAGACTCCTGGGTTATCAGGGCATCGCTGTGGTCATGGAGGAACTGCTAA	CDS
IP_133497.1	RP	CYFIP2	ATGAAGAGAACAAGTCCAAGTGGACGTGCACCCAGAGCAGCATCAGCCCCCAGTACAATATCTGCGAGCAGATGGTTCAGATCCGGGATGACCACATCCGCTTCATCTCCGAGCTCGCTCGCTACAGCAACAGTGAGGTGGTGA	CDS
IP_133545.1	MS	SOX30	ATGTCTTCACAGCCCCGACATCAACTCCTTCTAGCATCCAGCAAGTCAATGTCACCGACAGTGATGAGGAGGAAGAAGAAAAAGTGCTCAGGGATTTATAATTTTAAAACAAATATGCACAGAAAATAA	CDS
IP_133585.1	RP	EBF1	ATGAAGGCCAAGACAAGAACCCAGAAATGTGCCGAGTCTTGCTCACACATGAGATCATGTGCAGCCGCTGTTGTGACAAGAAAAGCTGTGGCAACCGAAATGAGACTCCCTCAGATCCAGTGA	CDS
IP_133878.1	RP	RARS	ATGACAGAGGAAATACAGCTGCTTACTTGTTGTATGCCTTCACTAGAATCAGGTCTATTGCACGTCTGGCCAATATTGATGAAGAAATGCTCCAAAAAGCTGCTCGAGAAACCAAGATTCTTTTGGATCATGAGAAGGAATGGAAACTAG	CDS
IP_134738.1	RP	TMED9	ATGGCTCCGAGGGCAGGTTCACTTTCACTTCCCATACCCCTGGTGAGCACCAGATCTGTCTTCACTCCAATTCCACCAAGTTCTCCCTCTTTGCTGGAGGCATGCTGA	CDS
IP_134919.1	MS	ZNF879	ATGCATGCAAAGAATGTGGGAAAGCCTTCAGCCAAAGCTCAGCTCTCATACAACATCAAAGAATTCACACTGGAGAAAAACCCTACAAATGTAATGAATGTGGGAAAGCCTTCTCTTGGATTTCACGGCTTAATATACATCACAGAATTCACACTGGAGAGAAACCATATAATTGTAAGGAATGTGGAAAAGCCTTCAGTTCCCACTCAGGCGTTAATACTCATCGAAAAATTCATACTGGAGAAAAACCTTATAAATGTAATGACTGTGAGAAAGCCTTCAACCAAAGCTCAGCTCTAA	CDS
IP_134945.1	RP	ADAMTS2	ATGTGGGCTGGGCGGCTCGCGGGGAACTTTCGCGCCGGCTGCGAGTGCGGGGCCCCGGCTGCAGTCCGGCTGCCATGGATCCGCCGGCGGGAGCCGCTCGCCGCCTGCTCTGCCCCGCGCTGCTGCTGCTGCTGCTGCTGCTGCCGCCGCCGCTCCTGCCGCCGCCGCCGCCGCCCGCGAACGCCAGGCTCGCCGCCGCCGCCGACCCCCCAGGCGGGCCCCTGGGGCACGGAGCGGAGCGCATCCTGGCGGTGCCCGTGCGCACTGACGCCCAGGGCCGCTTGGTGTCCCACGTGGTGTCGGCAGCTACGTCCAGAGCAGGGGTACGAGCCCGCAGGGCCGCCCCGGTCCGGACCCCGAGCTTCCCCGGAGGCAACGAGGAGGAGCCTGGCAGTCACC…	5'UTR
IP_134974.1	RP	HNRNPH1	ATGAAGTGCAGAGGTTTTTTTCTGACTGCAAAATTCAAAATGGGGCTCAAGGTATTCGTTTCATCTACACCAGAGAAGGCAGACCAAGTGGCGAGGCTTTTGTTGAACTTGAATCAGAAGATGAAGTCAAATTGGCCCTGA	CDS
IP_134975.1	RP	HNRNPH1	ATGATGGCTTTGTACGGCTTAGAGGACTTCCCTTTGGATGTAGCAAGGAAGAAATTGTTCAGTTCTTCTCAGGGTTGGAAATCGTGCCAAATGGGATAA	CDS
IP_134976.1	RP	HNRNPH1	ATGGTGGAGGCTATGGAGGCTATGATGATTACAATGGCTATAATGATGGCTATGGATTTGGGTCAGATAGATTTGGAAGAGACCTCAATTACTGTTTTTCAGGAATGTCTGATCACAGATACGGGGATGGTGGCTCTACTTTCCAGAGCACAACAGGACACTGTGTACACATGCGGGGATTACCTTACAGAGCTACTGAGAATGACATTTATAATTTTTTTTCACCGCTCAACCCTGTGA	CDS
IP_134977.1	RP	HNRNPH1	ATGATCCACCACGAAAGCTTATGGCCATGCAGCGGCCAGGTCCTTATGACAGACCTGGGGCTGGTAGAGGGTATAACAGCATTGGCAGAGGAGCTGGCTTTGAGAGGATGA	CDS
IP_135008.1	RP	CANX	ATGATGAGCCTGAGTACGTACCTGATCCAGACGCAGAGAAACCTGAGGATTGGGATGAAGACATGGATGGAGAATGGGAGGCTCCTCAGATTGCCAACCCTAGATGTGAGTCAGCTCCTGGATGTGGTGTCTGGCAGCGACCTGTGA	CDS
IP_135047.1	RP	SQSTM1	ATGATGACTGGACCCATCTGTCTTCAAAAGAAGTGGACCCGTCTACAGGTGAACTCCAGTCCCTACAGATGCCAGAATCCGAAGGGCCAAGCTCTCTGGACCCCTCCCAGGAGGGACCCACAGGGCTGA	CDS
IP_135049.1	RP	SQSTM1	ATGACATCTTCCGAATCTACATTAAAGAGAAAAAAGAGTGCCGGCGGGACCACCGCCCACCGTGTGCTCAGGAGGCGCCCCGCAACATGGTGCACCCCAATGTGA	CDS
IP_135274.1	RP	GNB2L1	ATGAGAGCCACTCAGAGTGGGTGTCTTGTGTCCGCTTCTCGCCCAACAGCAGCAACCCTATCATCGTCTCCTGTGGCTGGGACAAGCTGGTCAAGGTATGGAACCTGGCTAACTGCAAGCTGA	CDS
IP_135275.1	RP	GNB2L1	ATGAGACCAACTATGGAATTCCACAGCGTGCTCTGCGGGGTCACTCCCACTTTGTTAGTGATGTGGTTATCTCCTCAGATGGCCAGTTTGCCCTCTCAGGCTCCTGGGATGGAACCCTGCGCCTCTGGGATCTCACAACGGGCACCACCACGAGGCGATTTGTGGGCCATACCAAGGATGTGCTGA	CDS
IP_135276.1	RP	GNB2L1	ATGGTGGGGACATCATCAACGCCCTGTGCTTCAGCCCTAACCGCTACTGGCTGTGTGCTGCCACAGGCCCCAGCATCAAGATCTGGGATTTAG	CDS
IP_136643.1	RP	IRF4	ATGACTTTGAGGAACTGGTTGAGCGGAGCCAGCTGGACATCTCAGACCCGTACAAAGTGTACAGGATTGTTCCTGAGGGAGCCAAAAAAGGAGCCAAGCAGCTCACCCTGGAGGACCCGCAGATGTCCATGA	CDS
IP_136845.1	MS and RP	PRPF4B	ATGAAGAAAATGGAGAAGTATCAGAAGACCAGTCTCAAAATAAGCACAGTCGTCACAAAAAAAAGAAGCATAAACACAGAAGTAAACATAAGAAACATAAACATTCCTCAGAAGAAGACAAGGATAAAAAACATAAACATAAGCATAAACATAAGAAACACAAAAGAAAAGAGATTATTGATGCTTCTGATAAAGAGGGTATGTCTCCAGCAAAAAGAACTAAACTTGATGATTTAG	CDS
IP_136942.1	RP	NRN1	ATGCGGTCTTCAAGGGCTTTTCGGACTGTTTGCTCAAGCTGGGCGACAGCATGGCCAACTACCCGCAGGGCCTGGACGACAAGACGAACATCAAGACCGTGTGCACATACTGGGAGGATTTCCACAGCTGCACGGTCACAGCCCTTACGGATTGCCAGGAAGGGGCGAAAGATATGTGGGATAAACTGA	CDS
IP_137024.1	RP	RIOK1	ATGGCTGCATTAGCACAGGAAAAGAAGCTAATGTATACCATGCTAGCACAGCAAATGGAGAGAGCAGAGCAATCAAAATTTATAAAACTTCTATTTTGGTGTTCAAAGATCGGGATAAATATGTAA	CDS
IP_137197.1	RP	ELOVL2	ATGATGAAATCAATGCTTTTTTGGACAATATGTTTGGACCGCGAGATTCTCGAGTCAGAGGGTGGTTCATGTTGGACTCTTACCTTCCTACCTTTTTTCTTACTGTCATGTATCTGCTCTCAATATGGCTGGGTAACAAGTATATGA	CDS
IP_137228.1	RP	NEDD9	ATGACCAATGTGAGACCCATTTCATTTCCCTTCTCAACGCCATTGACGCACTCTTCAGTTGTGTCAGCTCAGCCCAGCCCCCGCGAATCTTCGTGGCACACAGCAAGTTTGTCATCCTCAGTGCACACAAACTGGTGTTCATTGGAGACACGCTGA	CDS
IP_137439.1	MS	JARID2	ATGAGGAACAGATTATCAGTCTGGTCAATCAGATCTGCGGCAAAGTGTCTGGTAAAAACGGCAGCATTGAGAACTGTCTCAGTAAACCCACACCAAAAAGAGGTCCCCGCAAGAGAGCGACAGTGGACGTGCCCCCCTCCCGTCTGTCAGCCTCCAGTTCATCCAAAAGTGCTTCGAGCTCATCATGAAGATGCCAACGCCCGTGGTCGATTTATATATATTTTTTTGTAA	CDS
IP_137449.1	RP	DTNBP1	ATGAGGATACATGGGCTGCACTTCACAGAAGAGCCAAAGACTGTGCAAGTGCTGGAGAGCTGGTGGATAGCGAGGTGGTCATGCTTTCTGCGCACTGGGAGAAGAAAAAGACAAGCCTCGTGGAGCTGCAAGAGCAGCTCCAGCAGCTCCCAGCTTTAA	CDS
IP_137606.1	RP	KDM1B	ATGAGGATGAAGATGGTGGCTCAGAGAAGAAGTACAGGAAATGTGAAAAGGCAGGCTGTACGGCAACATGTCCTGTGTGCTTTGCAAGTGCTTCTGAAAGATGTGCCAAAAATGGCTACACCTCCCGATGGTATCATCTCTCCTGTGGGGAACATTTCTGTAATGAATGCTTTGACCATTACTACAGAAGCCATAAGGATGGATATGACAAATATACTACATGGAAAAAAATATGGACTAGCAATGGCAAAACCGAACCTAGTCCCAAAGCTTTCATGGCAGACCAGCAACTCCCCTACTGGGTTCAGTGTACAAAACCTGAGTGTAGAAAATGGAGGCAGCTTACCAAGGAAATCCAGCTTACTCCACAGATAG	CDS
IP_137618.1	RP	DEK	ATGAATCTAGTAGTGATGAAGATGAAAAGAAAAACAAGGAAGAGTCTTCAGATGATGAAGATAAAGAAAGTGAAGAGGAGCCACCAAAAAAGACAGCCAAAAGAGAAAAACCTAAACAGAAAGCTACTTCTAAAAGTAAAAAATCTGTGA	CDS
IP_137619.1	RP	DEK	ATGTTAAGAAAGCAGATAGCAGCACCACCAAGAAGAATCAAAACAGTTCCAAAAAAGAAAGTGAGTCTGAGGATAGTTCAGATGATGAACCTTTAA	CDS
IP_137859.1	RP	FAM65B	ATGACATCTTTGAAAATGGAAAGGCAGCCGAGGAGAAAATGCCACTGTCGCTCAGCTTCAGTGACCTGCCCAACGGGGACTGCGCCCTCACCTCCCACTCAACAGGCTCCCCTTCCAACTCAACAAATCCAGAAATTACCATCACCCCTGCGGAGTTTAACCTCAGCAGCTTGGCCTCCCAGAATGAGGGTATGGATGACACCAGCTCAGCATCTTCCAGGAACTCCCTGGGAGAAGGCCAAGAGCCAAAGTCACACCTGA	CDS
IP_138232.1	RP	ZKSCAN8	ATGAATGTAATGAGTGTGGGAAAGCTTTCAGTCATAGCTCACACCTCATTGGACATCAGAGAATCCACACTGGGGAGAAGCCCTATGAGTGTGATGAGTGTGGGAAAACCTTCAGGCGGAGCTCACATCTTATTGGTCATCAGAGGAGCCACACTGGGGAGAAACCCTACAAATGCAATGAGTGTGGGAGGGCCTTCAGTCAGAAGTCAGGCCTTATTGAACATCAGAGAATCCACACTGGAGAAAGACCCTATAAATGTAAAGAATGTGGGAAAGCTTTCAATGGGAACACTGGTCTCATTCAACACCTGA	CDS
IP_138333.1	MS	ZSCAN12	ATGAATGTGGCAAAGCCTTTGGCCGGTGGTCAGCTCTTAACCAACATCAGAGACTTCACACAGGAGAAAAACACTATCACTGTAATGACTGTGGCAAAGCCTTTAGTCAGAAAGCAGGCCTCTTTCACCATATCAAGATCCACACAAGAGACAAACCTTATCAGTGCACTCAGTGTAATAAAAGTTTTAGTCGGCGTTCCATACTTACTCAGCATCAAGGAGTTCATACCGGCGCCAAGCCGTATGAGTGCAACGAGTGTGGAAAAGCCTTTGTTTATAACTCATCCCTTGTTTCCCATCAGGAAATCCACCACAAAGAAAAATGCTATCAGTGTAAGGAATGTGGGAAATCCTTCAGTCAGAGTGGCCTTATTCAGCATCAGAGAATTCACACTGGGG…	CDS
IP_138635.1	MS and RP	ABCF1	ATGTGGATGATGATGGAGAAGAGAAAGAGCTCATGGAGCGTCTTAAGAAGCTCTCAGTGCCAACCAGTGATGAGGAGGATGAAGTACCCGCCCCAAAACCCCGCGGAGGGAAGAAAACCAAGGGTGGTAATGTTTTTGCAGCCCTGA	CDS
IP_138650.1	RP	PPP1R10	ATGATAACATGGAGGAGAAGGTGCCCTGGGTGTGCCCCCGGCCCCTGGTTCTGCCCTCACCTCTTGTCACCCCTGGAAGCAATAGTCAGGAGCGATATATCCAGGCTGAGCGGGAGAAGGGAATCCTTCAGGAGCTCTTCCTGA	CDS
IP_138662.1	RP	MRPS18B	ATGGTACAACTGGAAACAGCCACCGGAGAGAGAACTGTCTCGCCTTCGCCGGCTTTACCAGGGTCATCTCCAAGAAGAGAGTGGCCCCCCACCTGA	3'UTR
IP_138701.1	RP	DHX16	ATGAGTGGGAACGGACAGAGCGTGAACGCCTTCAGGACCTGGAGGAGCGTGATGCCTTTGCTGAGCGGGTTCGACAGCGGGACAAGGATCGGACTCGAAATGTCCTGGAACGGTCAGACAAGAAGGCTTATGAAGAGGCTCAGAAGCGCCTCAAGATGGCCGAGGAAGACCGGAAGGCCATGGTCCCTGAGCTGCGGAAGAAATCTCGCCGAGAGTACCTGGCTAAGCGGGAGCGAGAGAAGCTTGAGGACCTGGAGGCGGAGCTGGCTGATGAGGAGTTCCTTTTTGGGGACGTGGAGCTGA	CDS
IP_138754.1	RP	TUBB	ATGCTGACCTCCGCAAGTTGGCAGTCAACATGGTCCCCTTCCCACGTCTCCATTTCTTTATGCCTGGCTTTGCCCCTCTCACCAGCCGTGGAAGCCAGCAGTATCGAGCTCTCACAGTGCCGGAACTCACCCAGCAGGTCTTCGATGCCAAGAACATGA	CDS
IP_138796.1	RP	GTF2H4	ATGCAGGAATCTGCAGGAATTCTTAGGGGGCCTGAGCCCTGGGGTATTGGACCGATTGTATGGGCACCCTGCCACATGTCTGGCTGTCTTCAGGGAGCTCCCATCCTTGGCTAA	CDS
IP_138917.1	RP	DDX39B	ATGTGGACAATGAGCTCTTGGACTATGAAGATGATGAGGTGGAGACAGCAGCTGGGGGAGATGGGGCTGAGGCCCCTGCCAAGAAGGATGTCAAGGGCTCCTATGTCTCCATCCACAGCTCTGGCTTTCGTGACTTCCTGCTCAAGCCAGAGTTGCTCCGGGCCATTGTCGACTGTGGCTTTGAGCATCCGTCAGAAGTCCAGCATGAGTGCATCCCTCAGGCCATTCTGGGAATGGATGTCCTGTGCCAGGCCAAGTCGGGCATGGGAAAGACAGCAGTGTTTGTCTTGGCCACACTGCAACAGCTGGAGCCAGTTACTGGGCAGGTGTCTGTACTGGTGA	CDS
IP_138993.1	RP	PRRC2A	ATGGGCAAGCAAACAGGAGCAGTCCGACCCCAAGAGTTCCGATGCCTCAACCGCTCAGCCGCCGGAATCGCAGCCACTGCCGGCTTCACAGACGCCTGCCTCCAACCAGCCGAAACGACCCCCAGCAGCCCCCGAGAACACTCCTTTGGTTCCAAGCGGGGTAAAGTCCTGGGCACAAGCCAGCGTCACCCATGGAGCACATGGAGATGGTGGAAGGGCATCAAGCCTACTGTCACGATTCTCTCGAGAGGAATTTCCGACCCTGCAGGCGGCTGGCGACCAGGACAAGGCTGCCAAGGAAAGGGAGTCTGCCGAACAGTCGTCTGGGCCCGGACCAAGCCTCCGCCCCCAAAATTCTACAACTTGGAGGGACGGAGGTGGGCGTGGCCCTGA	CDS
IP_139002.1	RP	PRRC2A	ATGGAGCACATGGAGATGGTGGAAGGGCATCAAGCCTACTGTCACGATTCTCTCGAGAGGAATTTCCGACCCTGCAGGCGGCTGGCGACCAGGACAAGGCTGCCAAGGAAAGGGAGTCTGCCGAACAGTCGTCTGGGCCCGGACCAAGCCTCCGCCCCCAAAATTCTACAACTTGGAGGGACGGAGGTGGGCGTGGCCCTGATGAGCTGGAGGGCCCGGACTCCAAACTTCATCATGGTCATGATCCCCGGGGTGGGCTACAGCCTTCAGGCCCACCCCAGTTCCCTCCCTACCGCGGAATGA	CDS
IP_139007.1	RP	BAG6	ATGCCTGGCCCTAAACCTGCACTGCTTGGGGGGACAGCAGATGGAGCTTGCTGCTGTTATCAATGGCCGAATTCGTCGTATGTCTCGTGGGGTGAATCCCTCCTTGGTGAGCTGGCTGACCACTATGATGGGACTGAGGCTTCAGGTGGTACTGGAGCACATGCCTGTAGGCCCTGA	CDS
IP_139013.1	RP	BAG6	ATGGGACTCGGCCCCCCCCAACTCCCAATGCAGAGGCACCTCCCCCTGGTCCTGGGCAGGCCTCATCCGTGGCTCCGTCTTCTACCAATGTCGAGTCCTCAGCTGAGGGGGCTCCCCCGCCAGGTCCAGCTCCCCCGCCAGCCACCAGCCACCCGAGGGTCATCCGGATTTCCCACCAGAGTGTGGAACCCGTGGTCATGA	CDS
IP_139015.1	RP	BAG6	ATGCCATTCTCAGATACGTTCGCAGGGTTGGTGATCCCCCCCAGCCACTTCCTGAGGAGCCAATGGAAGTTCAGGGAGCAGAAAGAGCTTCCCCTGAGCCTCAGCGGGAGAATGCTTCCCCAGCCCCTGGAACAACAGCAGAAGAGGCCATGTCCCGAGGTCCACCTCCTGCTCCTGAGGGGGGCTCCCGGGATGAACAGGATGGAGCTTCAGCTGAGACAGAACCTTGGGCAGCTGCAGTCCCCCCAGAATGGGTCCCTATTATCCAGCAGGACATTCAGAGCCAGCGGAAGGTGA	CDS
IP_139017.1	RP	BAG6	ATGATAAGAAGCTTCAGGAATACAATGTTGGGGGAAAGGTTATCCACCTGGTGGAACGGGCTCCTCCTCAGACTCACCTCCCTTCTGGGGCATCTTCTGGGACGGGGTCTGCCTCAGCCACTCATGGTGGGGGATCCCCCCCTGGTACTCGGGGGCCTGGGGCCTCTGTTCATGACCGGAATGCCAACAGCTATGTCATGGTTGGAACCTTCAATCTTCCTAGTGACGGCTCTGCTGTGGATGTTCACATCAACATGGAACAGGCCCCGATTCAGAGTGAGCCCCGGGTACGGCTGGTGA	CDS
IP_139061.1	RP	CSNK2B	ATGAATTCTTCTGTGAAGTGGATGAAGACTACATCCAGGACAAATTTAATCTTACTGGACTCAATGAGCAGGTCCCTCACTATCGACAAGCTCTAG	CDS
IP_139101.1	RP	CLIC1	ATGAAACCAGTGCTGAAGATGAAGGTGTCTCTCAGAGGAAGTTTTTGGATGGCAACGAGCTCACCCTGGCTGACTGCAACCTGTTGCCAAAGTTACACATAG	CDS
IP_139192.1	RP	EHMT2	ATGCTGGAGAAACTGCAAGAACCGGGTCGTACAGAGTGGCATCAAGGTGCGGCTACAGCTCTACCGAACAGCCAAGATGGGCTGGGGGGTCCGCGCCCTGCAGACCATCCCACAGGGGACCTTCATCTGCGAGTATGTCGGGGAGCTGATCTCTGA	CDS
IP_139241.1	RP	SKIV2L	ATGGCTCCACCTTCCGGGACCTGCTCCCTGGGGAGTATGTGCAGATGGCAGGCCGGGCAGGGCGGAGGGGCCTGGACCCCACAGGCACCGTTATCCTGCTCTGCAAGGGCCGAGTGCCCGAGATGGCAGACCTGCACCGCATGA	CDS
IP_139566.1	MS	COL11A2	ATGGACTCCCAGGGCTCCCTGGAGAGAAGGGCCATAGGGGTGATACTGGTGCCCAGGGCCTTCCTGGTCCCCCTGGTGAGGATGGAGAGAGGGGAGATGACGGGGAGATTGGGCCTCGAGGGCTGCCTGGAGAGTCGGGACCTCGAGGTCTCCTTGGCCCCAAAGGCCCACCTGGTATTCCTGGACCCCCTGGCGTCCGAGGCATGGATGGTCCCCAGGGCCCCAAAGGGAGCTTGGGACCCCAGGGAGAGCCAGGACCTCCTGGACAACAGGGCACCCCTGGGACCCAGGGTCTTCCCGGGCCCCAGGGTGCCATCGGCCCTCATGGAGAGAAGGGTCCTCAAGGGAAGCCAGGGCTCCCCGGCATGCCTGGCTCAGACGGACCCCCGGGTCACCCAG…	CDS
IP_139606.1	RP	SLC39A7	ATGCTTTCCTGCACCTCATTCCTCATGCTCTTGAACCTCATTCTCACCACACTCTGGAGCAACCCGGACATGGACACTCCCACAGTGGCCAGGGCCCCATTCTGTCTGTGGGACTGTGGGTTCTCAGTGGAATTGTTGCCTTTCTTGTCGTGGAGAAATTTGTGA	CDS
IP_139624.1	RP	VPS52	ATGACAGCAAAGAGGTTGAGAGCTTCCAGCAGCTGCTCAATGCTCGGACACAGGAATTCATTGAAGAGTTGCTGTCTCCCCCTTTTGGGGGTTTAG	CDS
IP_139680.1	RP	TAPBP	ATGCGAGCGGAAAGGGCCTGGCCAAGAGACCCGGTGCACTGCTGTTGCGCCAGGGACCGGGGGAACCGCCGCCCCGGCCGGACCTCGACCCTGAGCTCTATCTCAGTGTACACGACCCCGCGGGCGCCCTCCAGGCTGCCTTCAGGCGGTATCCCCGGGGCGCCCCCGCACCACACTGCGAGATGA	CDS
IP_139697.1	RP	DAXX	ATGATGATGACGAAGATGAAGCAGCTGCTCAGCCAGGGCCCTCCCACCCACTCCCCAATGCGGCCTCACCTGGGGCAGAAGCCCCTAGCTCCTCTGAGCCTCATGGGGCCAGAGGAAGCAGTAGTTCGGGCGGCAAGAAATGCTACAAGCTGGAGAATGAGAAGCTGTTCGAAGAGTTCCTTGAACTTTGTAAGATGCAGACAGCAGACCACCCTGAGGTGGTCCCATTCCTCTATAACCGGCAGCAACGTGCCCACTCTCTGTTTTTGGCCTCGGCGGAGTTCTGCAACATCCTCTCTAGGGTCCTGTCTCGGGCCCGGAGCCGGCCAGCCAAGCTCTATGTCTACATCAATGAGCTCTGCACTGTTCTCAAGGCCCACTCAGCCAAAAAGAAGCTGA	CDS
IP_139745.1	MS	SYNGAP1	ATGAATACCACTTGGGTCGCTCGAGGAGGAAGAGTGTCCCAGGGGGGAAGCAGTACAGCATGGAGGGTGCCCCTGCTGCGCCCTTCCGGCCCTCGCAAGGCTTCCTGA	CDS
IP_139760.1	RP	BAK1	ATGACTCAGAGTTCCAGACCATGTTGCAGCACCTGCAGCCCACGGCAGAGAATGCCTATGAGTACTTCACCAAGATTGCCACCAGCCTGTTTGAGAGTGGCATCAATTGGGGCCGTGTGGTGGCTCTTCTGGGCTTCGGCTACCGTCTGGCCCTACACGTCTACCAGCATGGCCTGA	CDS
IP_139792.1	RP	UQCC2	ATGGCCAGTGGACGAGACCAAACGGGGCCGGGACTTGGGCGCTTACCTGCGACAGCGGGTAGCACAGGCCTTTCGGGAGGGAGAGAATACCCAGGTTGCAGAGCCTGA	CDS
IP_139811.1	MS	LEMD2	ATGAGTTCTGTCAGGCCAAGCAGAAGGCAGCCTTGCTGGAGCTGCTGCATGAACTCTACAATTTCCTGGCCATCCAAGCTGGTAATTTTGAGTGTGGAAATCCAGAGAATCTAA	CDS
IP_140042.1	RP	DEF6	ATGACCCCGTGGCCCTGGAGGAACACTTCCGAGATGATGATGACGGCCCTGTGTCCAGCCAGGGATACATGCCCTACCTCAACAAGTACATCCTGGACAAGGTGGAGGAGGGGGCTTTTGTTAAAGAGCACTTTGATGAGCTGTGCTGGACGCTGA	CDS
IP_140051.1	MS	PPARD	ATGACTGGGCCTGCAGGTGTGGCGCCGAGGGGAGATCAGCCATGGAGCAGCCACAGGAGGAAGCCCCTGAGGTCCGGGAAGAGGAGGAGAAAGAGGAAGTGGCAGAGGCAGAAGGAGCCCCAGAGCTCAATGGGGGACCACAGCATGCACTTCCTTCCAGCAGCTACACAGACCTCTCCCGGAGCTCCTCGCCACCCTCACTGCTGGACCAACTGCAGATGGGCTGTGACGGGGCCTCATGCGGCAGCCTCAACATGGAGTGCCGGGTGTGCGGGGACAAGGCATCGGGCTTCCACTACGGTGTTCATGCATGTGAGGGGTGCAAGGGCTTCTTCCGTCGTACGATCCGCATGA	5'UTR
IP_140114.1	RP	FKBP5	ATGCATATGGCTCGGCTGGCAGTCTCCCTAAAATTCCCTCGAATGCAACTCTCTTTTTTGAGATTGAGCTCCTTGATTTCAAAGGAGAGGATTTATTTGAAGATGGAGGCATTATCCGGAGAACCAAACGGAAAGGAGAGGGATATTCAAATCCAAACGAAGGAGCAACAGTAG	CDS
IP_140170.1	RP	SRPK1	ATGACTTTAAAATATCAGGAGTTAATGGAACACATATCTGCATGGTATTTGAAGTTTTGGGGCATCATCTGCTCAAGTGGATCATCAAATCCAATTATCAGGGGCTTCCACTGCCTTGTGTCAAAAAAATTATTCAGCAAGTGTTACAGGGTCTTGATTATTTACATACCAAGTGCCGTATCATCCACACTGACATTAAACCAGAGAACATCTTATTGTCAGTGA	CDS
IP_140171.1	RP	SRPK1	ATGAGCAGTACATTCGGAGGCTGGCTGCAGAAGCAACAGAATGGCAGCGATCTGGAGCTCCTCCGCCTTCCGGATCTGCAGTCAGTACTGCTCCCCAGCCTAAACCAGCTGACAAAATGTCAAAGAATAAGAAGAAGAAATTGA	CDS
IP_140292.1	RP	KCTD20	ATGAGGATTCTGTGGACTGGGATGAAGACCACCCTCCACCAATGGGGGAGGAATATTCCCAAATTCTTTATAGCTCCAAGCTCTACAGATTCTTCAAATATATTGAGAATAGGGATGTTGCAAAAACAGTGTTAA	CDS
IP_140321.1	RP	SRSF3	ATGGTGAAAAAAGAAGTAGAAATCGTGGCCCACCTCCCTCTTGGGGTCGTCGCCCTCGAGATGATTATCGTAGGAGGAGTCCTCCACCTCGTCGCAGATCTCCAAGAAGGAGAAGCTTCTCTCGCAGCCGGAGCAGGTCCCTTTCTAGAGATAGGAGAAGAGAGAGATCGCTGTCTCGGGAGAGAAATCACAAGCCGTCCCGATCCTTCTCTAGGTCTCGTAGTCGATCTAGGTCAAATGAAAGGAAATAGAAGACAGTTTGCAAGAGAAGTGGTGTACAGGAAATTACTTCATTTGACAGGAGTATGTACAGAAAATTCAAGTTTTGTTTGA	CDS
IP_140415.1	RP	MTCH1	ATGAGCCGATGCCCCCCACCCTTGGGACCAATGTGCTGGGGAGGAAGGTCCTCTATCTGCCGAGCTTCTTCACCTACGCCAAGTACATCGTGCAAGTGGATGGTAAGATAG	CDS
IP_140500.1	RP	CMTR1	ATGACTTCAAGCTGGAGGACTTCTACTCTGCTTCCAGTGAACTCTTCGAACCCTACTATGGTGAGGGTGGGATTGATGGAGATGGAGATATCACCCGCCCAGAGAACATCTCTGCTTTTCGGAATTTTGTCCTGGATAACACAGATCGCAAGGGTGTCCATTTTCTGA	CDS
IP_140501.1	RP	CMTR1	ATGGGGGTTTCTCGGTGGAGGGGCAGGAGAACCTGCAGGAGATCCTCAGCAAGCAGCTGCTTCTGTGTCAGTTCCTCATGGCGCTGTCCATTGTCCGGACAGGAGGCCACTTCATCTGTAAAACCTTTGACCTGTTCACACCGTTTAGTGTGGGGCTTGTCTACCTGCTGTACTGCTGCTTTGAACGAGTTTGTCTCTTCAAGCCTATTACCAGCCGTCCTGCCAACTCAGAGAGGTATGTGGTGTGCAAGGGCCTGA	CDS
IP_141030.1	MS	TRERF1	ATGGAGCCCCTGACAGTGCTCTCCGCCAGCTGCTGTCTCAGAAGCCCATGGAGCCCCCAGCACCGGCTATCCCTTCCCGCTACCAGCAGGTGCCCCAGCAGCCTCACCCTGGTTTCACTGGTGGGCTGTCCAAACCAGCTCTTCAGGTCGGGCAGCACCCTACCCAAGGGCACCTGTATTATGACTACCAGCAGCCTCTGGCTCAGGTGCCAGTGCAGGGAGGACAGCCACTGCAGGCCCCACAGATGCTGTCACAGCACATGCAACAGATGCAGCAGCACCAGTATTACCCACCGCAGCAACAGCAGCAAGCCGGGCAACAGCGTATCTCCATGCAAGAAATACAGACGCAGCCGCAACAAATTCGCCCATCACAGCCACAGCCGCCGCCACAGCAGC…	CDS
IP_141116.1	RP	RPL7L1	ATGAAATTGCCTTCCCAGGGAAGCATTTCCAGGAGATCTCATGGTTCTTGTGCCCTTTCCACCTCTCAGTGGCCCGTCATGCTACCAAAAATAGAGTGGGCTTCCTCAAGGAGATGGGCACACCTGGCTATCGGGGTGAACGCATCAATCAGCTCATCCGTCAGCTGA	CDS
IP_141160.1	RP	MEA1	ATGCCCAGTGGGAAGATGTGGTACAGAAAGCCCTCCAAGCCCGGCAGGCATCCCCTGCCTGGAAGTGACCACAGTGAGAGCTGCCTTATATTCCTACATTCCAGGCCAGAACCAGCACAGGACTGA	CDS
IP_141180.1	RP	KLHDC3	ATGTCTTTGGGGGCCGTGCCGACCGCTTTGGGCCATTCCATTCCAACAATGAGATTTACTGCAACCGCATTCGAGTCTTTGACACCAGAACTGAGGCTTGGCTGGACTGTCCCCCGACTCCAGTGCTGCCTGAGGGGCGCCGGAGCCACTCGGCCTTTGGCTACAATGGGGAGCTGTACATCTTTGGTGGTTATAATGCAAGGCTGA	CDS
IP_141181.1	RP	KLHDC3	ATGGACACTCAACCGTCCTCATCGACGACACAGTCCTCCTTTGGGGCGGGCGGAATGACACCGAAGGGGCCTGCAATGTGCTCTATGCCTTTGACGTCAATACGCACAAGTGGTTCACACCCCGAGTGTCAGGGACAGTTCCTGGGGCCCGGGATGGACATTCAGCCTGTGTCCTAG	CDS
IP_141187.1	MS and RP	RRP36	ATGAGAAACTGCAGCAACTGCTTCAGCGAATGGAGCAGCAAGAAATGGCACAGCAGGAACGAAAGCAACAGCAGGAGCTGCACCTGGCCCTGA	CDS
IP_141233.1	RP	PTK7	ATGCACTGCAGGGGCGCCGGGCGCTGCTTCGCTGTGAGGTTGAGGCTCCGGGCCCGGTACATGTGTACTGGCTGCTCGATGGGGCCCCTGTCCAGGACACGGAGCGGCGTTTCGCCCAGGGCAGCAGCCTGA	CDS
IP_141362.1	MS	ZNF318	ATGAGAAATACAAGAAATATGTGGATGAAAACCCATTATATGAGGAGCGGCGGAATCTGGACCGCCAAGCTGGCTTGGCTGTGGTCCTAG	CDS
IP_141433.1	RP	POLR1C	ATGTCCATACTACTGACTTTCCCGGTAACTATTCCGGTTATGATGATGCCTGGGACCAGGACCGCTTCGAGAAGAATTTCCGTGTGGATGTAG	CDS
IP_141504.1	RP	MRPS18A	ATGACGATGTTCTGCTGCTTAGCCAGTTCATCCGGCCTCATGGAGGCATGCTGCCCCGAAAGATCACAGGCCTATGCCAGGAAGAACACCGCAAGATCGAGGAGTGTGTGA	CDS
IP_141683.1	RP	CDC5L	ATGACTTATGGGACCAAATTGAACAGGCTCACTTGGAGTTACGCACTTTTGAAGAACTCAAGAAACATGAAGATTCTGCTATTCCCCGGAGGCTAG	CDS
IP_141769.1	MS	ENPP4	ATGAAGAAAGCCATGGCATTGTGGCTAATTCCATGTATGATGCAGTCACAAAGAAACACTTTTCTGACTCTAATGACAAGGATCCTTTTTGGTGGAATGAGGCAGTACCTATTTGGGTGA	CDS
IP_141923.1	RP	CD2AP	ATGGACTTCCAGCTGGAGGAATTCAGCCACATCCACAAACCAAAAACATTAAGAAGAAGACCAAGAAGCGTCAGTGTAAAGTTCTTTTTGAGTACATTCCACAAAATGAGGATGAACTGGAGCTGA	CDS
IP_142113.1	RP	MCM3	ATGCAGAGGAAGCTGTGGAGTTGGTCCAGTATGCTTACTTTAAGAAGGTTCTGGAGAAGGAGAAGAAACGTAAGAAGCGAAGTGAGGATGAATCAGAGACAGAAGATGAAGAGGAGAAAAGCCAAGAGGACCAGGAGCAGAAGAGGAAGAGAAGGAAGACTCGCCAGCCAGATGCCAAAGATGGGGATTCATACGACCCCTATGACTTCAGTGACACAGAGGAGGAAATGCCTCAAGTACACACTCCAAAGACGGCAGACTCACAGGAGACCAAGGAATCCCAGAAAGTGGAGTTGA	CDS
IP_142306.1	MS	TINAG	ATGTTACCAGCACAAATAAAGAATCAGAAAAATATCGAAAGCTTCAGACACATGCAGTCAAACTCACTGGATTGCTGCCAATTCCTGGGGAAAGTCATGGGGAGAGAATGGCTATTTCAGGATTCTTCGAGGAGTAAATGA	CDS
IP_142627.1	MS	BAI3	ATGAAAAAAGGGTCCCTCAGGAACAAGCTGATGCTGCTAAATTTATGGCACAAACTGGTGAATCTGGTGTGGAAGAGTGGTCCCAGTGGAGCACATGTTCGGTTACTTGTGGTCAAGGGTCGCAGGTGCGAACCAGAACTTGTGTATCACCTTACGGGACACACTGCAGCGGCCCATTAA	CDS
IP_142643.1	RP	LMBRD1	ATGCAGATGCTCCTGAAGATCAGTGTACTGTTACCCGGACATACCTATTCCTTCACAAGTTCTGGTTCTTCAGTGCTGCTTACTATTTTGGTAACTGGGCCTTTCTTGGGGTATTTTTGA	CDS
IP_142807.1	RP	KCNQ5	ATGGCAAGGAAGACTGAGGTTTGCTCGAAAGCCCTTCTGTGTTATAGATACCATTGTTCTTATCGCTTCAATAGCAGTTGTTTCTGCAAAAACTCAGGGTAA	CDS
IP_142868.1	RP	EEF1A1	ATGAATATTATCCCTAATACCTGCCACCCCACTCTTAATCAGTGGTGGAAGAACGGTCTCAGAACTGTTTGTTTCAATTGGCCATTTAAGTTTAGTAGTAAAAGACTGGTTAATGATAACAATGCATCGTAA	CDS
IP_142937.1	RP	TMEM30A	ATGGAGATTCTAGTGCTTTGCTTAATCCCAGTAAGGAATGTGAACCTTATCGAAGAAATGAAGACAAACCAATTGCTCCTTGTGGAGCTATTGCCAACAGCATGTTTAATGATACATTAG	CDS
IP_142943.1	RP	TMEM30A	ATGGATGGGAGGAAAAAATCCATTTTTGGGGATTGCTTACATCGCTGTTGGATCCATCTCCTTCCTTCTGGGAGTTGTACTGCTAGTAATTAA	CDS
IP_142970.1	RP	SENP6	ATGGAGGTTTTAAAAATAATTGGAGCTTTGATCATGAAGAAGAAAGTGAAGGAGATACAGATAAAGATGGGACAAATCTGCTCAGTGTGGATGAAGATGAGGATTCTGAAACCTCAAAAGGAAAAAAGTTAA	CDS
IP_142974.1	RP	MYO6	ATGCTTGGAAATCTAAGAACAAGAAGAGAAATACTGAAACAGAGCAACGTGCTCCAAAGTCTGTTACTGATTATGATTTTGCACCATTTTTGA	CDS
IP_143022.1	RP	IRAK1BP1	ATGCTTATCACATGGAAGCAGAGGTCTGCATTACATTTACTGAATTTGGAAAAATGCAAAATATTTGTAACTTTCTTGTTGAAAAGCTAG	CDS
IP_143101.1	RP	TTK	ATGATGCACGTGACTACTTTCAAATGGCCAGAGCAAACTGCAAGAAATTTGCTTTTGTTCATATATCTTTTGCACAATTTGAACTGTCACAAGGTAATGTCAAAAAAAGTAAACAACTTCTTCAAAAAGCTGTAG	CDS
IP_143136.1	RP	IBTK	ATGAAAGAATTCGACTTGAGAAACTTACCTTTGCACATAGAGCTGTTAGTGTCAGCACAGATCCAAGTGGATGCAACTTTGCAATCCTGCAGTCAGATCCTAAAACAAGCCTTTATGAAATTCCAGCTGTGTCCTCATCATCCTTTTTTGAAGAGTTTGGCAAACTGTTGA	CDS
IP_143137.1	RP	IBTK	ATGAAGATGATAACCAGAAGTCTGCATTTGAAGTTTACAAAAGTAATCAAGCTCAAACAGTTAGTGAGAGGCAGAAGAGCAAACCTAAATCTTGTAAAAAAGGAAAAAATATTAGGGAAGATGATCCTGTAA	CDS
IP_143305.1	RP	SNX14	ATGTTGAAAGAAATGATAGAAGAGCAGTTGGACACGAGCCTGAACATTGGTCTGTCTATAGAAGATATCTTGAATTCTATGTACTTGAATCAAAACTAA	CDS
IP_143352.1	RP	ZNF292	ATGCTCAGAAACATTACAAAGATGGAATTTATAGTTGCCCCATATGTGCAAAGAACTTTAATTCTAAAGAAACTTTTGTCCCTCATGTCACACTGCATGTTAAACAATCTAGTAAAGAGAGACTAG	CDS
IP_143354.1	RP	ZNF292	ATGCGTATTATGCTGTGGAAATGTTGTATAATCAGCCAGACCAGAAATATGATGAAGAGAATCTTCCAATACCAAATTCTTTACGCTGTGAGCTGTTACTTGTATTGA	CDS
IP_143438.1	RP	RNGTT	ATGGCTTCAATCGCACTGGTTTCCTCATATGTGCCTTTTTGGTGGAGAAAATGGATTGGAGTATCGAAGCAGCAGTTGCTACTTTTGCCCAAGCCAGACCACCAGGAATCTACAAGGGTGATTATTTGA	CDS
IP_143698.1	RP	EPHA7	ATGCACCATGGTTTTTCAAACTCGGTACCCTTCATGGATTATTTTATGCTACATCTGGCTGCTCCGCTTTGCACACACAGGGGAGGCGCAGGCTGCGAAGGAAGTACTACTGCTGGATTCTAA	5'UTR
IP_143751.1	RP	UFL1	ATGGATTTCAGGAGCAGCTTCTTTACTCTGTGCTTGAGGAACTTGTTAATAGCGGACGCTTACGAGGCACTGTGGTTGGTGGGAGACAGGATAAAGCTGTGTTTGTCCCTGACATCTACTCCAGGACACAGAGTACTTGGGTGGATTCCTTTTTCAGGCAGAATGGCTATCTAG	CDS
IP_143895.1	RP	PNISR	ATGCACACCGCAAAGCAACGAAAGCTCCTGCAAAACAGCTGGCACAGTCCAGTGCACTGGCTTCCCTCACTGGACTCGGTGGACTGGGTGGTTATGGATCAGGAGACAGTGAAGATGAGAGGAGTGACAGAGGATCTGAGTCATCTGACACTGATGATGAAGAATTACGGCATCGAATCCGGCAAAAACAGGAAGCTTTTTGGAGAAAAGAAAAAGAACAGCAGCTATTACATGATAAACAGATGGAAGAAGAAAAGCAGCAAACAGAAAGGGTTACAAAAGAGATGA	CDS
IP_143941.1	RP	CCNC	ATGTGTGTTTTTGGCATCCAAAGTAGAGGAATTTGGAGTAGTTTCAAATACAAGATTGATTGCTGCTGCTACTTCTGTATTAAAAACTAG	CDS
IP_143944.1	RP	CCNC	ATGAGCAGTGGAAGAATTTCGATGAGAGAAAAGAGATGGCAACCATTCTTAGTAAGATGCCAAAACCAAAACCACCTCCAAACAGTGAAGGAGAGCAGGGTCCAAATGGAAGTCAGAACTCTAGCTACAGCCAATCTTAAAACATTCCGAAGAATTCCATAG	CDS
IP_143983.1	RP	ASCC3	ATGCCAGAGACCTTGCTGATTGGCTCAATATTAAGCAGATGGGCTTGTTTAACTTCCGACCATCAGTACGCCCAGTTCCACTGGAAGTTCACATTCAAGGCTTTCCAGGTCAACATTACTGTCCTCGTATGGCTAGTATGA	CDS
IP_144084.1	RP	PREP	ATGGTGCCAAAGAGCTTCCAGATGTGCTTGAAAGAGTCAAGTTCAGCTGTATGGCCTGGACCCATGATGGGAAGGGAATGTTCTACAACTCATACCCTCAACAGGATGGAAAAAGTGATGGCACAGAGACATCTACCAATCTCCACCAAAAGCTCTACTACCATGTCTTGGGAACCGATCAGTCAGAAGATATTTTGTGTGCTGAGTTTCCTGATGAACCTAAATGGATGGGTGGAGCTGAGTTATCTGATGATGGCCGCTATGTCTTGTTATCAATAA	CDS
IP_144087.1	RP	PREP	ATGGTCATAAAATTTGTGACCCTTACGCCTGGCTTGAAGACCCCGACAGTGAACAGACTAAGGCCTTTGTGGAGGCCCAGAATAAGATTACTGTGCCATTTCTTGAGCAGTGTCCCATCAGAGGTTTATACAAAGAGAGAATGA	CDS
IP_144133.1	RP	AIM1	ATGATGATATGGAAAAGGCTAATCATATTGAAAGTGTTATTAAATCAAACTTGCCAAACTGTGCAAACAGTGACACCGACTTCATGGGTCTTTTCAAATCAAGCCGGTATGACCCAAGCATTTCTTTTTCTGGAATGTCATTATCAGACACAATGA	CDS
IP_144141.1	RP	AIM1	ATGAAGAACCTGGATTTCAGGGTGTTCCTTTCATCCTGGAACCTGGTGAATACCCTGACTTGTCCTTCTGGGATACAGAAGAAGCGTACATTGGATCCATGCGGCCTCTGA	CDS
IP_144146.1	RP	AIM1	ATGTTTGGATTCTTTCACTGGCCCAAGGAGACGAAATCAGATTCACTTGTTTTCAGAACCACAGTTTCAAGGTCACAGTCAAAGTTTTGA	CDS
IP_144254.1	RP	SEC63	ATGAAGAAGAAGTTTCAGATAAGGGCAGTGATTCTGAAGAAGAAGAAACCAATAGAGATTCCCAAAGTGAGAAAGATGATGGTAGTGACAGAGACTCTGATAGAGAGCAAGATGAAAAACAAAACAAAGATGATGAAGCAGAGTGGCAAGAATTACAACAAAGCATACAGCGAAAAGAGAGAGCTCTATTGGAAACCAAATCAAAAATAA	CDS
IP_144406.1	RP	MICAL1	ATGAATTTGACGTCCTTATCTCGGCTGCAGGAGGTAAATTCGTCCCTGAAGGCTTCAAAGTTCGAGAAATGCGAGGCAAACTGGCCATTGGCATCACAGCCAACTTTGTGA	CDS
IP_144417.1	MS	ZBTB24	ATGAGCAAATTGCAGCAAAAGAAAAGGAAGAATCGGAGCCTACTTGTGAGCCAAGTAGAGAGGAGGAAATGCCAGTTGAAAAAGATGAGAACTATGATCCCAAGACCGAGGATGGCCAGGCAAGCCAGAGTCGATACAGCAAGCGGAGGATTTGGAGATCCGTCAAACTTAAAGATTACAAACTTGTTGGGGATCAAGAGGACCATGGTTCAGCCAAGAGGATCTGTGGAAGGAGAAAGCGCCCTGGAGGCCCTGAGGCCCGCTGTAAAGACTGTGGCAAGGTCTTTAAGTACAATCACTTTTTAG	CDS
IP_144456.1	MS	GPR6	ATGCCTTCCGCAACCAGGAGATCCAGCGCGCCCTGTGGCTCCTGCTCTGTGGCTGTTTCCAGTCCAAAGTGCCCTTTCGTTCCAGGTCTCCCAGCGAGGTCTGAAGGGCTCGCCCCGTGTCCTCTCACCAACACCACACCCCAACAAGCCAGCCTTTGGTAA	CDS
IP_144602.1	MS	FYN	ATGTCAAACATTATAAAATTCGCAAACTTGACAATGGTGGATACTACATTACCACCCGGGCCCAGTTTGAAACACTTCAGCAGCTTGTACAACATTACTCAGAGAGAGCTGCAGGTCTCTGCTGCCGCCTAG	CDS
IP_144671.1	RP	HDAC2	ATGCACCTGGTGTCCAGATGCAAGCTATTCCAGAAGATGCTGTTCATGAAGACAGTGGAGATGAAGATGGAGAAGATCCAGACAAGAGAATTTCTATTCGAGCATCAGACAAGCGGATAG	CDS
IP_144676.1	RP	HDAC2	ATGTTGCTCGATGTTGGACATATGAGACTGCAGTTGCCCTTGATTGTGAGATTCCCAATGAGTTGCCATATAATGATTACTTTGAGTATTTTGGACCAGACTTCAAACTGCATATTAGTCCTTCAAACATGA	CDS
IP_144739.1	RP	TSPYL1	ATGAACCCCAGTCCTTCATTCGCAGAAACCAAGACCTCATCTGCAGCTTCTTCACTTGGTTTTCAGACCACAGCCTTCCAGAGTCCGACAAAATTGCTGAGATTATTAAAGAGGATCTGTGGCCAAATCCACTGCAATACTACCTGTTGCGTGAAGGAGTCCGTAGAGCCCGACGTCGCCCGCTAA	CDS
IP_144911.1	RP	GOPC	ATGAAGGCCTTGGCATTTCAATTACAGGTGGGAAAGAACATGGTGTTCCAATCCTCATCTCTGAGATCCATCCGGGGCAACCTGCTGATAGATGCGGAGGGCTGCACGTTGGGGATGCTATTTTGGCAGTCAACGGAGTTAACCTAA	CDS
IP_144972.1	RP	ASF1A	ATGGTCCACATCAGAAAACTCACTAAATGTCATGTTAGAATCCCACATGGACTGCATGTGACCACCTACCATCCCTTTAGTACAAATTAA	CDS
IP_144976.1	RP	ASF1A	ATGCAGAGAGCAGTAATCCAAATCTACAGTCACTTCTTTCAACAGATGCATTACCTTCAGCATCAAAGGGATGGTCCACATCAGAAAACTCACTAA	CDS
IP_145031.1	RP	SERINC1	ATGAGAAAGGTGTTGTCCCTTGTAACATTTTGGTTGGCTATAAAGCTGTATATCGTTTGTGCTTTGGTTTGGCTATGTTCTATCTTCTTCTCTCTTTACTAA	CDS
IP_145248.1	RP	TRMT11	ATGTCCTGGTTTCAGATGCATCTAAACCTTCCTGGAGGAAGGGCACATATTTTGATGCAATCATTACTGATCCTCCATATGGTATCAGAGAATCTACAAGAAGAACAGGTTCACAGAAGGAGATACCAAAGGGGATAG	CDS
IP_145310.1	MS	SOGA3	ATGAGAAGCTGGCAGCAAAGACTGATGAATTTAACAGAACTGTATTTAGAACAGATAGAAATTGTCAGGCAATACAGCAAAATCACAGCTGCTCAAAATCATCGGAGGATCTCAAGCCCTGTGATACCTCATCTACTCACACAGGTAGCATATCACAAAGTAACGATGTGTCCGGTATTTGGAAAACCAATGCCCACATGCCTGTGCCCATGGAAAATGTGCCTGATAATCCCACCAAGAAATCCACAACAGGCCTAG	CDS
IP_145394.1	RP	ARHGAP18	ATGTACTTGCCAGGTTTCTCAGCCAAGAAAGTGGGGTTGCCCAGACTCTCAAGAAAGGAGAAGTTTTTTTGTATGAAATTGGAGGAAATATTGGGGAACGCTGCCTTGATGATGACACTTACATGA	CDS
IP_145441.1	RP	EPB41L2	ATGCTCTCCTGGGATCCTACACCCTGCAGGCTGAACTTGGTGACTATGACCCAGAAGAACATGGCAGCATCGACCTCAGTGAATTCCAGTTTGCCCCTACTCAGACTAAGGAGCTGGAAGAGAAGGTGGCAGAGCTGCACAAAACCCACAGGGGCTTATCGCCAGCACAAGCTGATTCCCAGTTCTTAG	CDS
IP_145443.1	RP	EPB41L2	ATGGAAAGTGTGCGTGGAGCATCATACTTTCTACAGGCTTGTTTCTCCAGAGCAGCCACCAAAAGCCAAGTTCCTGACCTTGGGGTCCAAATTTCGCTATAG	CDS
IP_145532.1	RP	CTGF	ATGGTGCTCCCTGCATCTTCGGTGGTACGGTGTACCGCAGCGGAGAGTCCTTCCAGAGCAGCTGCAAGTACCAGTGCACGTGCCTGGACGGGGCGGTGGGCTGCATGCCCCTGTGCAGCATGGACGTTCGTCTGCCCAGCCCTGACTGCCCCTTCCCGAGGAGGGTCAAGCTGCCCGGGAAATGCTGCGAGGAGTGGGTGTGTGACGAGCCCAAGGACCAAACCGTGGTTGGGCCTGCCCTCGCGGCTTACCGACTGGAAGACACGTTTGGCCCAGACCCAACTATGA	CDS
IP_145552.1	RP	STX7	ATGAAGAAATTACAGAGGATGACCTCCGTCTTATTCATGAGAGAGAATCTTCTATCAGGCAACTTGAAGCTGATATTATGGATATTAATGAAATATTTAAAGATTTGGGAATGA	CDS
IP_145679.1	RP	HBS1L	ATGAACAGGAGTCTAAAAAGGCTGGCAAAGCTTCGTTTGCATATGCATGGGTCTTGGATGAAACTGGCGAAGAAAGGGAAAGGGGAGTAA	CDS
IP_145683.1	RP	HBS1L	ATGATGAACCTGTCGACTGGGCGGCAGCAGGCGATCATGTTAGTCTTACTTTGGTTGGGATGGATATCATCAAAATCAATGTTGGCTGCATATTTTGTGGCCCCAAAGTACCCATTAAAGCTTGCACTCGTTTCAGAGCCCGAATCCTCATCTTTAATATTGAAATTCCTATCACTAAAGGATTTCCTGTGCTGTTACACTACCAAACTGTCAGTGAACCCGCCGTTATTAAACGATTGA	CDS
IP_145702.1	MS	MYB	ATGAAGACAATGTTCTCAAAGCATTTACAGTACCTAAAAACAGGTCCCTGGCGAGCCCCTTGCAGCCTTGTAGCAGTACCTGGGAACCTGCATCCTGTGGAAAGATGGAGGAGCAGATGA	CDS
IP_145704.1	RP	MYB	ATGATGAGGACTTTGAGATGTGTGACCATGACTATGATGGGCTGCTTCCCAAGTCTGGAAAGCGTCACTTGGGGAAAACAAGGTGGACCCGGGAAGAGGATGAAAAACTGA	CDS
IP_145715.1	MS	AHI1	ATGGTGGTCAAAATGTCCAAGAAATCATTACCCATCAACACTGTACGTAACTGTAAGAGGACTGAAAGTTCCAGACTGTATAAAGCCATCTTACCGCTCTATGATGGCTCTTCAGGAGGAAAAAGGTAA	CDS
IP_145761.1	RP	BCLAF1	ATGACCCATCTGAGTCTATCGATGAATTTAATAAGTCATCAGCCACATCCGGTGATATTTGGCCTGGCCTTTCAGCTTATGATAATAGTCCTAGATCACCCCATAGTCCTTCACCTATTGCTACACCACCTAGTCAGAGTTCATCTTGCTCTGATGCTCCCATGCTCAGTACAGTTCACTCTGCAAAAAATACTCCTTCTCAGCATTCACATTCCATTCAGCATAGTCCTGAAAGGTCTGGGTCTGGTTCTGTTGGAAATGGATCTAGTCGATACAGTCCTTCTCAGAATAGTCCAATTCATCACATCCCTTCACGAAGAAGTCCTGCAAAGACAATCGCACCACAGAATGCTCCAAGAGATGAGTCTAGGGGCCGTTCCTCGTTTTATCCTGATGGTG…	CDS
IP_145764.1	RP	BCLAF1	ATGACGACAGAGATGATGGTGTGGATTATTGGGCCAAAAGAGGAAGAGGTCGTGGTACTTTTCAACGTGGCAGAGGGCGCTTTAACTTCAAAAAATCAGGTAGCAGTCCTAAATGGACTCATGACAAATACCAAGGGGATGGGATTGTTGAAGATGAAGAAGAGACCATGGAAAATAATGAAGAAAAGAAGGACAGACGCAAGGAAGAAAAGGAATAATAAATATGAAGTAAGATTACAACAGAGCAGAACTTGCACCCACCATTTTTTTTACCTGATTTTTGTTTTCAAATAA	CDS
IP_145765.1	RP	BCLAF1	ATGGGTACAGAGGAAGGGGTAGAGGGTATTATCAAGGAGGAGGAGGTAGATATCATCGAGGTGGTTATAGACCTGTCTGGAATAGAAGGCACTCTAGGAGTCCTAGACGAGGTCGTTCACGTTCCAGGAGTCCAAAAAGAAGATCCGTTTCTTCTCAAAGATCCAGAAGCAGATCTCGCCGGTCATATAGATCTTCTAGGTCTCCAAGATCATCCTCTTCTCGTTCTTCATCCCCATATAGCAAATCTCCTGTTTCTAAAAGACGAGGGTCTCAGGAAAAACAAACCAAAAAAGCTGAAGGGGAACCCCAAGAAGAGAGTCCGTTGA	CDS
IP_145877.1	RP	TNFAIP3	ATGATACTCGGAACTGGAATGATGAATGGGACAATCTTATCAAAATGGCTTCCACAGACACACCCATGGCCCGAAGTGGACTTCAGTACAACTCACTGGAAGAAATACACATATTTGTCCTTTGCAACATCCTCAGAAGGCCAATCATTGTCATTTCAGACAAAATGCTAA	CDS
IP_145880.1	RP	TNFAIP3	ATGTGCAGCACAACGGATTTTGTGAACGTTGCCACAACGCCCGGCAACTTCACGCCAGCCACGCCCCAGACCACACAAGGCACTTGGATCCCGGGAAGTGCCAAGCCTGCCTCCAGGATGTTACCAGGACATTTAATGGGATCTGCAGTACTTGCTTCAAAAGGACTACAGCAGAGGCCTCCTCCAGCCTCAGCACCAGCCTCCCTCCTTCCTGTCACCAGCGTTCCAAGTCAGATCCCTCGCGGCTCGTCCGGAGCCCCTCCCCGCATTCTTGCCACAGAGCTGGAAACGACGCCCCTGCTGGCTGCCTGTCTCAAGCTGCACGGACTCCTGGGGACAGGACGGGGACGAGCAAGTGCAGAAAAGCCGGCTGCGTGTATTTTGGGACTCCAGAAAACA…	CDS
IP_145946.1	MS	NHSL1	ATGATGGCTACCGCAGTTCTCAGTACTACTCTCAGGGACCCACCTTTGCGGCCAACGCCAGCCCATTCTGTGATGATTACCAAGATGAAGATGAAGAAACAGATCAAAAGTGTTCTCTGTCTTCATCAGAAGAAGAAAGATTTATTTCCATCAGGAGACCTAAAACACCAGCCTCAAGTGACTTCTCCGACCTTAATACTCAGACGAACTGGACCAAGTCGCTTCCACTGCCAACACCAGAAGAGAAGATGCGACAGCAAGCCCAAACAGTCCAGGCTGACGTGGTGCCTATTAACATAA	CDS
IP_145950.1	MS	NHSL1	ATGAGGAAAGCCGATGGACAGTCCACTACACTGCCCCGTGGCACCAGCAGGAGAATGTGTTCCTTCCCACCACAAGACCCCCCTGTGTTGAGGACCTGCACCGCCAAGCCAAGCTCAACCTCAAATCAGTACTGA	CDS
IP_145992.1	RP	REPS1	ATGATGAAGCCGAGAAACATCCAGAAGTCCTGCCGGCTGAAAAAGCTTCTGATCCTGCAAGTTCTCTTCGAGTTGCCAAAACAGATAGTAAAACTGAAGAAAAGACAGCTGCTAGTGCTCCTGCCAATGTGA	CDS
IP_146008.1	MS	HECA	ATGATGAGATCGAATATGATGTTCCTTGTCACCTTCAAGGGAGACTCATGCATCTGTATGCCGTGTGCGTGGACTGCCTGGAAGGGGTTCACAAGATCATCTGCATCAAGTGTAAGTCACGGTGGGATGGCAGCTGGCACCAGCTGGGCACTATGTACACCTACGACATCCTGGCTGCCTCTCCATGTTGTCAGGCCCGCCTGA	CDS
IP_146049.1	RP	VTA1	ATGGGGAGACTCCTCAAGCAGGCCCTGTTGGAATTGAAGAAGATAATGATATTGAAGAAAATGAAGATGCTGGAGCAGCCTCTCTGCCCACTCAGCCAACTCAGCCATCATCATCTTCAACTTATGACCCAAGCAACATGCCATCAGGCAACTATACTGGAATACAGATTCCTCCGGGTGCACACGCTCCAGCTAATACACCAGCAGAAGTGCCTCACAGCACAGGTGTAG	CDS
IP_146199.1	RP	LTV1	ATGATGATTTTGACTTTGATGATCCAGATAATCTGCTTGAGGATGACTTTATTCTTCAGGCCAATAAGGCAACAGGAGAGGAAGAGGGAATGGATATACAGAAATCTGAGAATGAAGATGACAGCGAGTGGGAAGATGTGGATGATGAGAAGGGAGATAGCAATGATGACTATGACTCTGCAGGCCTATTGTCAGATGAAGACTGTATGTCTGTGCCCGGAAAAACTCACAGAGCTATAG	CDS
IP_146200.1	MS and RP	LTV1	ATGATGAGAGGTTTGAGAAGTTTTATGAGCAATATGATGATGATGAAATTGGAGCTCTGGATAATGCAGAATTGGAAGGTTCTATTCAAGTGGACAGCAATCGCTTACAGGAAGTTTTGA	CDS
IP_146241.1	RP	UTRN	ATGTGCTACAGAGGAAACTCCGAGAGGTGTCCACAAAGTTCCAGCTTTTCCAGAAGCCAGCTAACTTCGAGCAGCGCATGCTGGACTGCAAGCGTGTGCTGGATGGCGTGA	CDS
IP_146460.1	RP	PPIL4	ATGAGCAGGCCGAAGACTCAAAATCAAGTCACTCACACACAAGTAAAAAACACAAGAAGAAAACCCATCACTGTTCTGAAGAGAAAGAAGATGAGGACTACATGCCAATCAAAAATACTAATCAGGATATCTATAGAGAAATGGGGTTTGGTCACTATGAAGAAGAAGAAAGCTGTTGGGAGAAACAAAAGAGTGAAAAGAGAGACCGAACTCAGAACCGAAGTCGTAGCCGATCTCGAGAGAGGGATGGCCATTATAGTAATAGTCATAAATCAAAATACCAAACAGATCTTTATGAAAGAGAAAGGAGTAAAAAGAGAGACCGAAGCAGAAGTCCAAAGAAGTCCAAAGATAAAGAAAAATCTAAGTATAGATGAAAGATGA	CDS
IP_146461.1	MS and RP	PPIL4	ATGACAGAAGAATACATGTGGATTTTAGCCAGTCGGTTGCAAAGGTTAAATGGAAAGGAAAAGGTGGGAAATACACCAAGAGTGATTTCAAGGAGTATGAAAAAGAACAGGATAAACCACCTAATTTGGTTCTGA	CDS
IP_146492.1	RP	NUP43	ATGCGAAGTTTGTGTCCCAGAAAATCAGCAAAACCCGCTGGCGACCGCTGCCTCCGGGAAGTTTACAGACCGCGGAGACGTTCGCTACAGGATCTTGGGACAATGAGGAAAATTATATTTCACTGTGGTCTATTGGAGATTTTGGAAACTTGGACTCTGATGGAGGGTTTGAAGGAGACCATCAGTTATTGTGTGATATCAGACACCATGGTGATGTAA	CDS
IP_146507.1	RP	PCMT1	ATGTCAGGAAGGACGATCCAACACTTCTGTCTTCAGGGAGAGTACAGCTTGTTGTGGGGGATGGAAGAATGGGATATGCTGAAGAAGCCCCTTATGATGCCATTCATGTGGGAGCTGCAGCCCCTGTTGTACCCCAGGCGCTAA	CDS
IP_146664.1	RP	ZBTB2	ATGTATACTTCAAGGCACACAAATCAGTTCTTGCTTCATTCTCCAATTACTTTAAGATGTTGTTTGTCCATCAGACCAGTGAGTGTGTCCGCTTGA	CDS
IP_146682.1	RP	C6orf211	ATGAGTTTTTTAAACTTCTGCAGATTTCACTGTGGGGAAATAAGTGTGATCTGTCTCTCTCAGGTGGAGAAAGTAGTTCTCAGAATACCAATGTACTAA	CDS
IP_146801.1	RP	FBXO5	ATGAAGACAGTGGCTATTCCTCATTTTCTCTACAAAGTGGCCTCAGTGAACATGAAGAAGGTAGCCTCCTGGAGGAGAATTTCGGTGACAGTCTACAATCCTGCCTGCTACAAATACAAAGCCCAGACCAATATCCCAACAAAAACTTGCTGCCAGTTCTTCATTTTGAAAAAGTGGTTTGTTCAACATTAA	CDS
IP_146950.1	RP	SCAF8	ATGTATTTAAGAGTGAGATTATTCAGCCCCTTTTGGATATGGCAGCCGGGATTCCGCCTCCAGTTGTCACACCTGTTTTGGCCAGCACTACCACTGCTATGA	CDS
IP_146956.1	RP	SCAF8	ATGAGAGAGAGCATCGGGTTCTACCGGTCTATGGTGGTCCAAAAGGCTTACATGAAGAAAGAGGTAGATTTCGGTCTGGAAACTATCGATTTGATCCTAGAAGTGGTCCTTGGAACCGAGGATTTGGACAAGAAGTTCACAGAGATTTTGATGACCGCAGAAGACCCTGGGAGAGGCAAAGGGATAGGGATGACAGAGATTTTGATTTCTGCAGAGAAATGA	CDS
IP_146985.1	RP	TFB1M	ATGCTTATGTTTACGAAGTGGGCCCTGGGCCAGGGGGAATCACAAGATCTATTCTTAATGCCGACGTCGCTGAACTTCTGGTGGTTGAAAAGGACACTCGATTTATTCCTGGATTACAGATGCTTTCTGATGCAGCACCTGGGAAACTGA	CDS
IP_147010.1	MS	ARID1B	ATGACGTCCTCTCTGCTCGGCCAGGGGCATTGCCTGAAGACGCAAACCCTGGGCCCCAGACCGAAAGCAGTAAGTTTCCCTTTGGTATCCAGCAAGCCAAAAGTCACCGGAACATCAAGCTGCTGGAGGACGAGCCCAGGAGCCGAGACGAGACTCCTCTGTGTACCATCGCGCACTGGCAGGACTCGCTGGCTAAGCGATGCATCTGTGTGTCCAATATTGTCCGTAGCTTGTCATTCGTGCCTGGCAATGATGCCGAAATGTCCAAACATCCAGGCCTGGTGCTGA	CDS
IP_147083.1	RP	SNX9	ATGAGCGTCTCCTGGTTAAGTTTGGGTCAGCCATTCCAATCCCTTCTCTTCCAGACAAACAAGTCACAGGCCGCTTTGAAGAGGAATTTATCAAAATGCGCATGGAGAGACTTCAGGCCTGGATGA	CDS
IP_147490.1	RP	QKI	ATGGCACCTACAGAGATGCCAACATTAAATCACCAGCCCTTGCCTTTTCTCTTGCAGCAACAGCCCAGGCTGCTCCAAGGATCATTACTGGGCCTGCGCCGGTTCTCCCACCAGCTGCCCTGCGTACTCCTACGCCAGCTGGCCCTACCATAA	CDS
IP_147574.1	RP	SFT2D1	ATGGTTTGCCATCTGCTTCGTATGTGGCGTTTTCTTTTCTATTCTTGGAACTGGATTGCTGTGGCTTCCGGGCGGCATAAAGCTTTTTGCAGTGTTTTATACCCTCGGCAATCTTGCTGCGTTAGCCAGTACATGCTTTTTAATGGGACCTGTGAAGCAACTGAAGAAAATGTTTGA	CDS
IP_147673.1	RP	MLLT4	ATGGTCTGGAAAAAGAAAACCCTAAGGATTACTGCATCGCCCGGGTTATGCTTCCTCCTGGAGCCCAGCATTCTGATGAAAAGGGTGCTAAAGAAATTATTCTTGATGATGATGAGTGTCCTTTACAAATCTTCAGGGAATGGCCAAGTGACAAAGGGATTTTAG	CDS
IP_147768.1	MS	THBS2	ATGATAACCAGTTTCTCTGGGAGCTCATTGGTGGCCCTCCTAAGACAAGGAACATGTCAGCTTGCTGGCAGGATGGCCGGTTCTTTGCGGAAAATGAAACGTGGGTGGTGGACAGCTGCACCACGTGTACCTGCAAGAAATTTAAAACCATTTGCCACCAAATCACCTGCCCGCCTGCAACCTGCGCCAGTCCATCCTTTGTGGAAGGCGAATGCTGCCCTTCCTGCCTCCACTCGGTGGACGGTGAGGAGGGCTGGTCTCCGTGGGCAGAGTGGACCCAGTGCTCCGTGA	CDS
IP_147814.1	MS	PHF10	ATGGTGATTCAGATGATGGCGAAGATGGTCGAGGTGATGAGAAACGGAAAAATAAAGGCACTTCGGACAGCTCCTCTGGCAATGTATCTGAAGGGGAAAGCCCTCCTGACAGCCAGGAGGACTCTTTCCAGGGAAGACAGAAATCAAAAGACAAAGCTGCCACTCCAAGAAAAGATGGTCCCAAACGTTCTGTACTGTCCAAGTCAGTTCCTGGGTACAAGCCAAAGGTCATTCCAAATGCTATATGTGGAATTTGTCTGA	CDS
IP_149726.1	RP	SNX8	ATGTGGAGTATGAGGTTTCCAGCCAGCGCTTCAAGTCCTCGGTATACAGACGGTACAATGACTTCGTGGTCTTCCAGGAGATGCTCCTGCACAAGTTCCCCTACCGTATGGTGCCTGCCCTGCCACCCAAGAGAATGCTGGGAGCTGACAGGGAGTTCATCGAGGCCAGGAGGAGAGCCCTGA	CDS
IP_149839.1	MS	CARD11	ATGAGTTCCTCAGAAGGCAGAAGACGGAGACCATCATCTACTCCCGAGAGAAGAACCCCAACGCGTTCGAATGCATCGCCCCTGCCAACATTGAAGCTGTGGCCGCCAAGAACAAGCACTGCCTGCTGGAGGCTGGGATCGGCTGCACAAGAGACTTGA	CDS
IP_149843.1	RP	CARD11	ATGAAGAGGACGCCTTGTGGGAGAATGTGGAGTGTAACCGGCACATGCTCAGCCGCTATATCAACCCTGCCAAGCTCACGCCCTACCTGCGTCAGTGTAAGGTCATTGATGAGCAGGATGAAGATGAAGTGCTTAATGCCCCTATGCTGCCATCCAAGATCAACCGAGCAGGCCGGCTGTTGGACATTCTACATACCAAGGGGCAAAGGGGCTATGTGGTCTTCTTGGAGAGCCTAG	CDS
IP_150008.1	RP	TNRC18	ATGTGGTCGAGAAGAAAGACTTGGAGTTGGAGAAGGAAGCCCCCAGCCCCTTCCAGGCCCTGTTCTCAGATATCCCGCCCAGGTACCCGTTCCAAGCCCTGCCACCGCACTACGGGAGGCCCTACCCTTTCCTGCTGCAGCCCACGGCCGCCGCCGACGCGGACGGCTTGGCCCCTGATGTGCCGCTCCCGGCTGATGGGCCCGAGCGCCTGGCACTCTCACCCGAAGACAAGCCCATCCGCTTGTCCCCCTCCAAGATCACAGAGCCGCTGCGGGAGGGCCCGGAGGAAGAACCGCTGGCTGAGCGGGAGGTGA	CDS
IP_150087.1	RP	CCZ1	ATGAGAAGATTAGAAATGTCGGATTGTGTGAAGCTATTGTACAGTTTACAAGGACATTTAGCCCATCAAAACCTGCAAAATCTTTACATACACAGAAGAACAGACAGTTCTTCAATGAACCAGAAGAAAATTTCTGGATGGTCATGGTTGTTCGGAATCCTATAA	CDS
IP_150228.1	RP	ZNF12	ATGAATGTAGTGAATGTGGGAAAACCTTCTACCAGAACTCAGCCCTTTGTAGACATCGGAGAATACACAAAGGAGAGAAGCCCTATGAATGCTATATATGTGGAAAATTCTTCTCTCAGATGTCATACCTCACTATACATCATAGAATTCATTCAGGAGAGAAGCCCTATGAATGTAGTGAATGTGGGAAAACCTTCTGCCAGAATTCAGCCCTTAATCGACATCAGAGAACACACACAGGAGAGAAAGCCTACGAATGTTATGAATGTGGGAAGTGCTTCTCTCAGATGTCCTATCTCACTATACATCATCGAATTCATTCAGGAGAGAAACCCTTTGAATGTAATGAGTGTGGAAAAGCCTTCTCTCGGATGTCATACCTCACTGTACATTATAGAA…	CDS
IP_150338.1	RP	PHF14	ATGGAGACAATGAGGATGATGAAGATGAGGGAAGCGGGAGTGATGAAGACGAGAATGATGAAGGCAATGATGAAGATCATAGTAGCCCTGCCAGTGAAGGGGGTTGCAAGAAGAAGAAGAGTAAAGTTCTTAGCAGAAACAGTGCTGATGATGAGGAACTGA	CDS
IP_150376.1	MS	THSD7A	ATGGCGCAGATGCCAATTAGTCCCTTGGAGCGTGCAACAAGACAGCCCTGGAGCACAGGAAGGCTGTGGGCCTGGGCGACAGGCAAGAGCCATTACTTGTCGCAAGCAAGATGGAGGACAGGCTGGAATCCATGA	CDS
IP_150584.1	RP	HDAC9	ATGAAGATGCTCAGATCCAGGAAATGGAATCTGGGGAGCAGGCTGCTTTTATGCAACAGCCTTTCCTGGAACCCACGCACACACGTGCGCTCTCTGTGCGCCAAGCTCCGCTGGCTGCGGTTGGCATGGATGGATTAG	CDS
IP_150708.1	RP	SP4	ATGCGGGATGAGCGAAGAAGGAGGAGGAGGAGGAGGCGGCAGCGGCAGCGGCGATGGCTACAGAAGGAGGGAAAACCTCTGAGCCAGAGAATAACAATAAAAAACCCAAAACCTCAGGCTCCCAGGACTCTCAGCCCTCTCCTCTGGCTTTACTGGCAGCTACTTGCAGCAAAATAG	5'UTR
IP_150953.1	RP	HNRNPA2B1	ATGGATATGGCAGTGGACGTGGATTTGGGGATGGCTATAATGGGTATGGAGGAGGACCTGGAGGTGGCAATTTTGGAGGTAGCCCCGGTTATGGAGGAGGAAGAGGAGGATATGGTGGTGGAGGACCTGGATATGGCAACCAGGGTGGGGGCTACGGAGGTGGTTATGACAACTATGGAGGAGGAAATTATGGAAGTGGAAATTACAATGATTTTGGAAATTATAACCAGCAACCTTCTAACTACGGTCCAATGA	CDS
IP_150956.1	RP	HNRNPA2B1	ATGGGGAAAGCTTACAGACTGTGTGGTAATGAGGGATCCTGCAAGCAAAAGATCAAGAGGATTTGGTTTTGTAACTTTTTCATCCATGGCTGA	CDS
IP_150994.1	RP	SKAP2	ATGGAAAGAAAGATTGCTGTTTTGAAATCTCTGCTCCTGATAAACGTATATATCAGTTTACAGCAGCTTCTCCCAAAGATGCTGAAGAATGGGTACAGCAGCTGA	CDS
IP_151224.1	RP	SCRN1	ATGGTCTGGTGGTATTTGGGAAAAATTCAGCCCGGCCCAGAGATGAAGTGCAAGAGGTTGTGTATTTCTCGGCTGCTGATCACGAACCGGAGAGCAAGGTTGAGTGCACTTACATTTCAATCGACCAAGTTCCAAGGACCTATGCCATAA	CDS
IP_151341.1	RP	GARS	ATGAGATGGCCCATTATGCCTGTGACTGTTGGGATGCAGAATCCAAAACATCCTACGGTTGGATTGAGATTGTTGGATGTGCTGATCGTTCCTGTTATGACCTCTCCTGTCATGCACGAGCCACCAAAGTCCCACTTGTAG	CDS
IP_151342.1	RP	GARS	ATGTTCCGTCCTCCCACTGAGCCAAAACCAGGAGTTCATGCCATTTGTCAAGGAATTATCGGAAGCCCTGACCAGGCATGGAGTATCTCACAAAGTAGACGATTCCTCTGGGTCAATCGGAAGGCGCTATGCCAGGACTGA	CDS
IP_151489.1	MS	PDE1C	ATGCCAAGCGATCAGGTGTCAAGACCTCTGGTTCAGAGGGAAGTGCCCCGATCAACAATTCTGTCATCTCCGTTGACTATAAGAGCTTTAAAGCTACTTGGACGGAAGTGGTGCACATCAATCGGGAGAGATGGAGGGCCAAGGTACCCAAAGAGGAGAAGGCCAAGAAGGAAGCAGAGGAAAAGGCTCGCCTGGCCGCAGAGGAGCAGCAAAAGGAAATGGAAGCCAAAAGCCAGGCTGAAGAAGGCGCATCTGGCAAAGCTGAGAAAAAGACGTCTGGAGAAACTAAGAATCAAGTCAATGGAACACGGGCAAACAAAAGTGACAACCCTCGTGGGAAAAACTCCAAAGCCGAGAAGTCATCAGGAGAACAGCAACAGAATGGTGACTTCAAAGATG…	CDS
IP_151682.1	RP	ANLN	ATGCTAAGCGAGCTAGACAGCCACTTTCAGAAGCAAGTAACCAGCAGCCCCTCTCTGGTGGTGAAGAGAAATCTTGTACAAAACCATCGCCATCAAAAAAACGCTGTTCTGACAACACTGAAGTAG	CDS
IP_151713.1	RP	ELMO1	ATGGGTGGTCTCTTGCCAACCATGAATATTTTGCACTCCAGCATGCCGATAGTTCAAACTTCTATATCACAGAAAAGAACCGCAATGAGATAA	CDS
IP_151782.1	RP	VPS41	ATGTGTATTTGCATAAGCTTTTCAAGAGAGACCACCATAAGGGGCAGCGTTACCATGAAAAACAGATCAGTCTTTATGCTGAATATGATCGACCAAACTTACTTCCCTTTCTCCGAGACAGTACCCATTGCCCACTTGAAAAGGCTCTTGAGATCTGTCAACAGAGAAACTTTGTAG	CDS
IP_151788.1	MS	VPS41	ATGAAAGTGGAGAGCACATGGGTGTGTGTTCAGAGGATGGCAAGGTGCAGGTATTTGGACTGTATTCTGGAGAAGAATTTCACGAGACTTTTGACTGTCCCATTAAAATTATTGCTGTGCACCCACATTTCGTGA	CDS
IP_151828.1	RP	CDK13	ATGATCTTTCAAAGAGTCCAGAGGAAAAGAAAACAGCAACACAGTTACATAGTAAAAGGAGGCCTAAAATATGTGGGCCTCGCTATGGTGAAACCAAAGAAAAAGATATTGACTGGGGAAAACGCTGCGTGGATAAATTTGATATCATCGGAATTATTGGAGAAGGTACTTACGGACAAGTTTACAAAGCCAGGGATAAAGACACTGGAGAAATGGTAG	CDS
IP_151891.1	MS	HECW1	ATGGGCTCAGCGAGGTGGACACGGTGGCCGCTGACCCGTCTGCCCTGGAAGAGGACAGAGAAGAGCCCGAGGGGGCTACTCCAGGCACGGCGCACCCTGGCCACTCCGGGGGCCACTTCCCCAGCCTGGCCAATGGCGCGGCCCAGGATGGCGACACGCACCCCAGCACCGGGAGCGAGAGCGACTCCAGCCCCAGGCAAGGCGGGGACCACAGTTGCGAGGGCTGTGACGCGTCCTGCTGCAGCCCCTCGTGCTACAGCTCCTCGTGCTACAGCACGTCCTGCTACAGCAGCTCGTGCTACAGCGCCTCGTGCTACAGCCCCTCCTGCTACAACGGCAACAGGTTCGCCAGCCACACGCGCTTCTCCTCCGTGGACAGCGCCAAGATCTCCGAGAGCA…	CDS
IP_152155.1	RP	DDX56	ATGCTGAAGTCCTGGGGGCCCCAGTCAAGGGCAAGCGTCGGGGCCGAGGGCCCAAAGGGGACAAGGCCTCTGATCCGGAAGCAGGTGTGGCCCGGGGCATAG	CDS
IP_152165.1	RP	OGDH	ATGTGGAGGAGATGTACTGTGCTTGGCTGGAAAACCCCAAAAGTGTACATAAGTCATGGGACATTTTTTTTCGCAACACGAATGCCGGAGCCCCACCGGGCACTGCCTACCAGAGTCCCCTTCCCCTGA	CDS
IP_152283.1	RP	TBRG4	ATGAGAAGCTGGGGTCAGAGCTGCCAGGCCTGGAGCCAGCCCTGCAGGTGGACCTGGTGTGGGCCCTGTGTGTGCTGCAGCAGGCACGGGAAGCAGAGCTGCAAGCCGTCCTCCACCCTGAATTTCACATCCAATTTCTAG	CDS
IP_152453.1	MS	UPP1	ATGAAGGGCAAGGCCGTCTGGATGGGGCTCTCTGCTCCTACACGGAGAAGGACAAGCAGGCGTATCTGGAGGCAGCCTATGCAGCCGGCGTCCGCAATATCGAGATGGAGTCCTCGGTGTTTGCCGCCATGTGCAGCGCCTGCGGCCTCCAAGCGGCCGTGGTGTGTGTCACCCTCCTGA	CDS
IP_152502.1	RP	IKZF1	ATGTGCTCATGGTTCACAAAAGAAGCCACACTGGAGAACGGCCCTTCCAGTGCAATCAGTGCGGGGCCTCATTCACCCAGAAGGGCAACCTGCTCCGGCACATCAAGCTGCATTCCGGGGAGAAGCCCTTCAAATGCCACCTCTGCAACTACGCCTGCCGCCGGAGGGACGCCCTCACTGGCCACCTGA	CDS
IP_152712.1	RP	GBAS	ATGGTAACGAAGCCGTCGGAGGATTCTTCTCTCAGATTGGGCAGCTGTACATGGTGCACCATCTTTGGGCTTACAGGGATCTTCAGACCAGGGAAGACATACGGAATGCAGCATGGCACAAACATGGCTGGGAGGAATTGGTATATTACACAGTTCCACTTATTCAGGAAATGGAATCCAGAATCATGA	CDS
IP_152961.1	RP	RABGEF1	ATGTGGATCAATCGGATCTCCTGTGCAAGAAAGGATGTGGTTACTACGGCAACCCTGCCTGGCAGGGTTTCTGCTCCAAGTGCTGGAGGGAAGAGTACCACAAAGCCAGGCAGAAGCAGATTCAGGAGGACTGGGAGCTGGCGGAGCGACTCCAGCGGGAGGAAGAAGAGGCCTTTGCCAGCAGTCAGAGCAGCCAAGGGGCCCAATCCCTCACATTCTCCAAGTTTGAAGAAAAGAAAACCAACGAGAAGACCCGCAAGGTTACCACAGTGA	5'UTR
IP_153028.1	MS	WBSCR17	ATGGCTTATCCAAATCCCTTGGGCTCATTGAAGGTTATGGTGGGCGGGGTAAAGGGGGCCTTCCGGCTACTCTTTCCCCGGCTGAAGAAGAAAAGGCTAAGGGACCCCATGAGAAGTATGGCTACAATTCATACCTCAGTGAAAAAATTTCACTGGACCGTTCCATTCCGGATTATCGTCCCACCAAGTGTAAGGAGCTCAAGTACTCCAAGGACCTGCCCCAGATATCCATCATATTCATCTTCGTGA	CDS
IP_153186.1	RP	BCL7B	ATGGCTTTCCTTCTGATGCCTCAGCCAATTCCTCTCTCCTTCTTGAATTCCAGGACGAAAACAGCAACCAGAGTTCCGTGTCTGACGTCTATCAGCTTAAGGTGGACAGCAGCACCAACTCAAGCCCCAGCCCCCAGCAGAGTGAGTCCCTGA	CDS
IP_153231.1	RP	WBSCR22	ATGGTTGCATCAGCATTTCTGCTGTGCAGTGGCTCTGTAATGCTAACAAGAAGTCTGAAAACCCTGCCAAGCGCCTGTACTGCTTTTTTGCTTCTCTTTTTTCTGTTCTCGTCCGGGGATCCCGAGCTGTCCTGCAGCTGTACCCTGAGAACTCAGAGCAGTTGGAGCTGA	CDS
IP_153304.1	RP	LIMK1	ATGAGAAGGATGGGCAGCTCTTCTGCAAGAAGGACTACTGGGCCCGCTATGGCGAGTCCTGCCATGGGTGCTCTGAGCAAATCACCAAGGGACTGGTTATGGTGGCTGGGGAGCTGA	CDS
IP_153308.1	RP	EIF4H	ATGGCCCTCCCCTCCGTGGATCCAACATGGATTTCAGAGAACCCACAGAAGAGGAAAGAGCACAGAGACCACGACTCCAGCTTAAACCTCGAACAGTCGCGACGCCCCTCAATCAAGTAG	CDS
IP_153390.1	RP	GTF2I	ATGATCTGTACGTGGAAGGACTGCCAGAAAACATTCCTTTCCGAAGTCCCTCATGGTATGGAATCCCAAGGCTGGAAAAAATCATTCAAGTGGGCAATCGAATTAAATTTGTTATTAAAAGACCAGAACTTCTGA	CDS
IP_153392.1	MS	GTF2I	ATGATGTTGATGAAAAACAGCCCCTATCGAAGCCTTTGCAAGGAAGCCACCATTCTTCAGAGGGCAATGAAGGCACAGAAATGGAAGTACCAGCAGAAGATGATGATTATTCTCCACCGTCTAAGAGACCAAAGGCCAATGAGCTACCGCAGCCACCAGTCCCGGAACCCGCCAATGCTGGGAAGCGGAAAGTGA	CDS
IP_153505.1	RP	POR	ATGCCCAGGACTTCTACGACTGGCTGCAGGAGACAGACGTGGATCTCTCTGGGGTCAAGTTCGCGGTGTTTGGTCTTGGGAACAAGACCTACGAGCACTTCAATGCCATGGGCAAGTACGTGGACAAGCGGCTGGAGCAGCTCGGCGCCCAGCGCATCTTTGAGCTGGGGTTGGGCGACGACGATGGGAACTTGGAGGAGGACTTCATCACCTGGCGAGAGCAGTTCTGGCCGGCCGTGTGTGAACACTTTGGGGTGGAAGCCACTGGCGAGGAGTCCAGCATTCGCCAGTACGAGCTTGTGGTCCACACCGACATAG	CDS
IP_153627.1	RP	FGL2	ATGGTGTCGAACTATATGCCTTGTATGATCAGTTTTATGTGGCTAATGAGTTTCTCAAATATCGTTTACACGTTGGTAACTATAATGGCACAGCTGGAGATGCATTACGTTTCAACAAACATTACAACCACGATCTGA	CDS
IP_153652.1	RP	TMEM60	ATGGGGGGAAAAGGGCGGAAAAGGACAAGGATCCAAACTGGCGAATTTGCTGATCTTCGCGTCCCTCTCCGCTTTCCGGCCGGCAGCGCTGCCAGGGTATATTTCCTTTTTTCCGATCCTGCAACAGCCTCTTTAAACTGTTTAAATGAGAATGTCCTTGGCTCAGAGAGTACTACTCACCTGGCTTTTCACACTACTCTTCTTGATCATGTTGGTGTTGAAACTGGATGA	5'UTR
IP_154163.1	MS and RP	FZD1	ATGAATCGCAAGTTTCCGCGGCGGCGGCGGCTGCGGTACGCAGAACAGGAGCCGGGGGAGCGGGCCGAAAGCGGCTTGGGCTCGACGGAGGGCACCCGCGCAGAGGTCTCCCTGGCCGCAGGGGGAGCCGCCGCCGGCCGTGCCCCTGGCAGCCCCAGCGGAGCGGCGCCAAGAGAGGAGCCGAGAAAGTATGGCTGA	5'UTR
IP_154192.1	RP	CYP51A1	ATGCAGATTTGGATGGAGGTTTCAGCCATGCAGCCTGGCTCTTACCAGGTTGGCTGCCTTTGCCTAGTTTCAGACGCAGGGACAGAGCTCATCGGGAAATCAAGGATATTTTCTATAAGGCAATCCAGAAACGCAGACAGTCTCAAGAAAAAATTGATGACATTCTCCAAACTTTACTAG	CDS
IP_154212.1	RP	KRIT1	ATGCATATGTTGCTGTTATTCGTCCAAAGAATACTGCCAGTCTCAATTCTCGGGAATACAGAGCTAAGTCATATGAAATTTTGTTGCATGAAGTTCCCATTGAAGGACAGAAAAAAAAGAGAAAGAAAGTTTTATTGGAAACGAAACTTCAAGGCAACAGTGAAATAA	CDS
IP_154417.1	RP	COL1A2	ATGGAACTCCAGGTCAAACAGGAGCCCGTGGGCTTCCTGGTGAGAGAGGACGTGTTGGTGCCCCTGGCCCAGCTGGTGCCCGTGGCAGTGATGGAAGTGTGGGTCCCGTGGGTCCTGCTGGTCCCATTGGGTCTGCTGGCCCTCCAGGCTTCCCAGGTGCCCCTGGCCCCAAGGGTGAAATTGGAGCTGTTGGTAACGCTGGTCCTGCTGGTCCCGCCGGTCCCCGTGGTGAAGTGGGTCTTCCAGGCCTCTCCGGCCCCGTTGGACCTCCTGGTAATCCTGGAGCAAACGGCCTTACTGGTGCCAAGGGTGCTGCTGGCCTTCCCGGCGTTGCTGGGGCTCCCGGCCTCCCTGGACCCCGCGGTATTCCTGGCCCTGTTGGTGCTGCCGGTGCTACTG…	CDS
IP_154420.1	RP	COL1A2	ATGGTCACCCTGGAAAACCCGGACGACCTGGTGAGAGAGGAGTTGTTGGACCACAGGGTGCTCGTGGTTTCCCTGGAACTCCTGGACTTCCTGGCTTCAAAGGCATTAGGGGACACAATGGTCTGGATGGATTGA	CDS
IP_154422.1	RP	COL1A2	ATGGCTGCTCTAAAAAGACAAATGAATGGGGAAAGACAATCATTGAATACAAAACAAATAAGCCATCACGCCTGCCCTTCCTTGATATTGCACCTTTGGACATCGGTGGTGCTGACCAGGAATTCTTTGTGGACATTGGCCCAGTCTGTTTCAAATAAATGA	CDS
IP_154615.1	RP	ASNS	ATGACAAAGGAGGAATTGAGCAAACAATTTGTATGTTGGATGGTGTGTTTGCATTTGTTTTACTGGATACTGCCAATAAGAAAGTGTTCCTGGGTAGAGATACATATGGAGTCAGACCTTTGTTTAAAGCAATGA	CDS
IP_154617.1	RP	ASNS	ATGAAGTCCTTTTTAACTCTGAGGAAGGCATTCAGGCTCTGGATGAAGTCATATTTTCCTTGGAAACTTATGACATTACAACAGTTCGTGCTTCAGTAG	CDS
IP_154720.1	RP	TRRAP	ATGTGCTGGCTGCCAACCCCAACAGGTTCATCACCCTGCTGCTGCCGGGGGGTGCCCAGACGGCTGTGCGCCCCGGTTCGCCCAGCACCAGCACCATGCGCCTGGACCTCCAGTTCCAGGCCATCAAGATCATAA	CDS
IP_154726.1	MS	TRRAP	ATGAGCAGGAGAGCATCACCCCGCCGCAGCAGGAGATACTGGATTCCCTTGCGGAGCTTTACTCCCTGTTACAAGAGGAAGATATGTGGGCTGGTCTGTGGCAGAAGCGGTGCAAGTACTCGGAGACAGCGACTGCGATTGCTTACGAGCAGCACGGGTTCTTTGAGCAGGCACAAGAATCCTATGAAAAGGCAATGGATAAAGCCAAAAAAGAACATGAGAGGAGTAACGCCTCCCCTGCTATTTTCCCTGAATACCAGCTCTGGGAAGACCACTGGATTCGATGCTCCAAGGAATTGA	CDS
IP_154763.1	RP	ARPC1A	ATGAACTCAAGGAGCACAACGGACACATCACAGGTATTGACTGGGCTCCCAAGAGCGACCGCATTGTCACTTGTGGGGCAGACCGCAATGCCTATGTCTGGAGTCAGAAAGATGGTGTTTGGAAGCCAACCCTGGTGA	CDS
IP_154774.1	RP	PDAP1	ATGAGAGTGAGGATGAAGAAGATGACTACCAGCAAAAGCGCAAAGGCGTTGAAGGGCTCATCGACATCGAGAACCCCAACCGGGTGGCACAGACAACCAAAAAGGTCACACAACTGGATCTGGACGGGCCAAAGGAGCTTTCGAGGAGAGAACGAGAAGAGATTGAGAAGCAGAAGGCAAAAGAGCGTTACATGA	CDS
IP_154981.1	RP	ZKSCAN1	ATGAGGAAGACCACATGTGGGGGCAGGATTCCACCCTACAGGACACGCCTCCTCCAGACCCAGAGATATTCCGCCAACGCTTCAGGCGCTTCTGTTACCAGAACACTTTTGGGCCCCGAGAGGCTCTCAGTCGGCTGA	5'UTR
IP_154982.1	RP	ZKSCAN1	ATGAATGTAGTGAGTGTGGGAAAGCCTTCAGTCTTAACTCCAACCTTGTCCTGCATCAGAGGATCCACACAGGAGAGAAACCTCATGAATGTAACGAGTGTGGCAAGGCCTTCAGCCACAGTTCCAATCTCATCCTCCATCAGCGCATCCACTCTGGAGAGAAACCTTATGAATGTAATGAGTGCGGGAAGGCCTTCAGCCAGAGCTCGGACCTCACCAAGCATCAGAGAATTCACACGGGGGAGAAACCCTATGAATGTAGTGAATGTGGAAAAGCTTTCAACCGAAACTCATACCTGA	CDS
IP_155031.1	RP	MCM7	ATGACCCCGAGTTGGTGGACTCAATTTGTGAGAATGCCAGGCGCTACGCGAAGCTCTTTGCTGATGCCGTACAAGAGCTGCTGCCTCAGTACAAGGAGAGGGAAGTGGTAA	CDS
IP_155035.1	RP	MCM7	ATGAGTTCGACAAGATGGCTGAGGCCGACCGCACAGCCATCCACGAGGTCATGGAGCAGCAGACCATCTCCATTGCCAAGGCCGGCATTCTCACCACACTCAATGCCCGCTGCTCCATCCTGGCTGCCGCCAACCCTGCCTACGGGCGCTACAACCCTCGCCGCAGCCTGGAGCAGAACATACAGCTACCTGCTGCACTGCTCTCCCGGTTTGACCTCCTCTGGCTGA	CDS
IP_155222.1	RP	AGFG2	ATGAGAAGAAGAGATGGTATGTCCCCCCAGACCAAGTCAAGGGGCCCACTTATACCAAAGGCAGTGCCTCCACCCCTGTGCAGGGCTCCATCCCAGAAGGGAAGCCCCTTCGGACACTTCTGGGTGATCCTGCACCGTCTCTCTCAGTTGCTGCCTCCACCTCGAGCCAGCCCGTCAGTCAGTCTCACGCTCGGACATCCCAGGCCCGGAGCACTCAGCCACCTCCCCACTCCTCTGTCAAAAAAGCCAGTACTGACCTGCTGGCTGACATCGGTGGAGACCCCTTTGCTGCACCCCAGATGGCACCAGCTTTTGCTGCATTCCCTGCCTTTGGGGGCCAGACACCTTCCCAAGGAGGCTTTGCCAACTTTGATGCCTTTAGCAGTGGCCCCAGCTCTT…	CDS
IP_155235.1	RP	LRCH4	ATGGTGGGCTGGACTCAGGCTTCCACAGCGTTGATAGTGGCAGCAAGAGGTGGTCTGGAAATGAGTCAACAGATGAATTTTCAGAGCTGTCATTCCGGATCTCAGAGCTGGCCCGGGAGCCCCGGGGACCCAGAGAACGCAAGGAGGATGGCTCAGCGGACGGAGACCCTGTGCAGATTGACTTCATCGACAGCCATGTCCCCGGGGAGGATGAAGAGCGAGGCACTGTGGAGGAGCAGCGACCACCCGAATTAA	CDS
IP_155236.1	RP	LRCH4	ATGCCTGAACCCAGCCTTGGGGAATCTCACAGCCCTCACCTACCTCAACCTCAGCCGAAACCAGCTGTCGCTGCTGCCACCCTACATCTGCCAGCTGCCCCTGAGGGTCCTCATCGTCAGCAACAACAAGCTGGGAGCCCTGCCCCCTGA	CDS
IP_155258.1	RP	MOSPD3	ATGTCCGACCGCCCAGAGCCTGCATGCGCCGTGGGGCGCCCCAGGACCAGGAGCTGGTGGGTCCGGGGCCCCCTGGGCGGGGGTCCCGGGGCGCCCCTCCTCCCTTGGGACCCGTTGTCCCGGTCCTGGTCTTTCCCCCGGATCTAG	5'UTR
IP_155282.1	RP	GNB2	ATGCCATGCACTGGGGGACCGACTCAAGGCTGCTGGTCAGCGCCTCCCAGGATGGGAAGCTCATCATCTGGGACAGCTACACCACCAACAAGGTCCACGCCATCCCGCTGCGCTCCTCCTGGGTAA	CDS
IP_155284.1	RP	GNB2	ATGGCCGCACGTTTGTGTCAGGCGCCTGTGATGCCTCTATCAAGCTGTGGGACGTGCGGGATTCCATGTGCCGACAGACCTTCATCGGCCATGAATCCGACATCAATGCAGTGGCTTTCTTCCCCAACGGCTACGCCTTCACCACCGGCTCTGACGACGCCACGTGCCGCCTCTTCGACCTGCGGGCCGATCAGGAGCTCCTCATGTACTCCCATGACAACATCATCTGTGGCATCACCTCTGTTGCCTTCTCGCGCAGCGGACGGCTGCTGCTCGCTGGCTACGACGACTTCAACTGCAACATCTGGGATGCCATGA	CDS
IP_155285.1	RP	GNB2	ATGACAACCAAATCATCACCAGCTCTGGGGATACCACCTGTGCCCTGTGGGACATTGAGACAGGCCAGCAGACAGTGGGTTTTGCTGGACACAGTGGGGATGTGA	CDS
IP_155299.1	MS and RP	GIGYF1	ATGGGGCCTTTGGACGAAGCCCCCGGGAAATCCAGCGCAGCCAGAGCTGGGATGACAGAGGCGAGAGGCGGTTTGAGAAGTCAGCAAGGCGGGATGGAGCACGATGTGGCTTTGAGGAGGGAGGGGCTGGCCCAAGGAAGGAGCACGCCCGCTCAGACAGCGAGAACTGGCGCTCCCTACGGGAGGAACAGGAGGAGGAGGAGGAGGGCAGCTGGAGGCTCGGAGCAGGGCCCCGGCGAGACGGCGACCGCTGGCGCTCCGCCAGCCCTGATGGTGGTCCCCGCTCTGCTGGCTGGCGGGAACATGGGGAACGGCGGCGCAAGTTTGAATTTGATTTGCGAGGGGATCGAGGAGGGTGTGGTGAAGAGGAGGGGCGGGGAGGGGGAGGCAGCTCTCACC…	CDS
IP_155368.1	RP	SRRT	ATGAGAAGAAGGAAGACGGCAAGCAGGCTGAGAATGACAGTTCTAATGATGACAAAACAAAGAAGTCGGAGGGTGATGGGGACAAGGAAGAGAAGAAAGAAGACTCCGAGAAGGAAGCCAAAAAGAGTAGCAAGAAGCGGAACCGGAAGCACAGTGGTGACGACAGCTTTGACGAGGGCAGCGTGTCAGAGTCTGAGTCGGAGTCAGAGAGCGGCCAGGCTGAGGAGGAGAAGGAGGAGGCCGAAGAAGCGCTCAAGGAGAAGGAGAAGCCCAAGGAAGAAGAATGGGAGAAGCCCAAGGACGCCGCGGGGCTGGAGTGCAAGCCGCGGCCGCTGCATAAGACCTGCTCCCTCTTCATGCGCAACATCGCGCCCAACATCTCCCGGGCCGAGATCATCT…	CDS
IP_155369.1	RP	SRRT	ATGACGAGTACGATCGAAGGCGCAGGGACAAGTTCAGAAGAGAGCGCAGCGACTACGACCGTTCCCGCGAGAGAGATGAAAGACGTCGAGGGGACGATTGGAATGACAGAGAGTGGGACCGTGGCCGTGAGCGCCGTAGTCGGGGTGAATATCGGGACTATGACCGGAATCGGCGAGAGCGCTTCTCGCCACCTCGCCACGAACTCAGCCCGCCACAGAAGCGCATGA	CDS
IP_155370.1	RP	SRRT	ATGACTCGGTGGATGAGACGGAGGCCGTCAAGCGCTATAATGACTACAAGCTGGATTTCCGGAGGCAACAGATGCAGGATTTCTTCCTGGCGCACAAAGATGAGGAGTGGTTTCGGTCTAAGTACCACCCAGATGAGGTGGGGAAGCGTCGGCAGGAGGCCCGGGGGGCCCTGCAAAACCGACTGA	CDS
IP_155475.1	RP	ZNHIT1	ATGACAACTTCCAGGATGACCCCCACGCGGGACTCCCTCAGCTCGGCAAGAGACTGCCTCAGTTTGATGACGATGCGGACACTGGAAAGAAAAAGAAGAAAACCCGAGGTGATCATTTTAAACTTCGCTTCCGAAAAAACTTTCAGGCCCTGTTGGAGGAGCAGAACTTGA	CDS
IP_155484.1	RP	FIS1	ATGATGACATCCGTAAAGGCATCGTGCTGCTCGAGGAGCTGCTGCCCAAAGGGAGCAAGGAGGAACAGCGGGATTACGTCTTCTACCTGGCCGTGGGGAACTACCGGCTCAAGGAATACGAGAAGGCCTTAA	CDS
IP_155729.1	MS	LRRC17	ATGTCCATTTTAATGGCCTGGAATGCAAAACGCCTGAAGAATACAAAGGATGGTCTGTGGGAAAATATATTAGAAGTTACTATGAAGAATGCCCCAAAGACAAGTTACCAGCATATCCTGAGTCATTTGACCAAGACACAGAAGATGATGAATGGGAAAAAAAACATAGAGATCACACCGCAAAGAAGCAAAGCGTAA	3'UTR
IP_155777.1	RP	PMPCB	ATGGCAATCTTTGCCATAGCTTTCAGTCTTTCAACACTTCCTACACAGATACAGGATTATGGGGACTGTATATGGTTTGTGAATCATCCACTGTTGCAGACATGCTACATGTTGTTCAAAAAGAATGGATGCGACTCTGTACAAGTGTCACAGAAAGTGAGGTTGCACGAGCCAGAAATCTTCTGA	CDS
IP_155799.1	RP	PSMC2	ATGCGTGCTTCATTCGAGTTATTGGATCTGAGCTTGTACAGAAATACGTCGGTGAGGGGGCTCGAATGGTTCGTGAACTCTTTGAAATGGCCAGAACAAAAAAAGCCTGCCTTATCTTCTTTGATGAAATTGATGCTATTGGAGGGGCTCGTTTTGATGATGGTGCTGGAGGTGACAATGAAGTGCAGAGAACAATGTTGGAACTGA	CDS
IP_155809.1	MS	SLC26A5	ATGGCTACCAGGTTGACGGCAATCAGGAGCTCATTGCCCTGGGACTGTGCAATTCCATTGGCTCACTCTTCCAGACCTTTTCAATTTCATGCTCCTTGTCTCGAAGCCTTGTTCAGGAGGGAACCGGTGGGAAGACACAGCTTGCAGGTTGTTTGGCCTCATTAA	CDS
IP_155867.1	RP	KMT2E	ATGCAGTTGAGCCAACTGCCCTACATAAAACCCTGGAAACGCCTGCACATGACAGGGCTGAGCCCAACAGCCAACTGGACTCGACTCACTCTGGACGGGGCACAATGTATTCTTCCTGGGTAA	CDS
IP_155880.1	RP	SRPK2	ATGGGGGCACTTCTCTACTGTCTGGCTGTGCTGGGATATGCAGGGGAAAAGATTTGTTGCAATGAAAGTTGTAAAAAGTGCCCAGCATTATACGGAGACAGCCTTGGATGA	CDS
IP_155902.1	RP	PUS7	ATGCAGAGAAGAATGGGCAAAGACCAAAGACCCAACTGCTGCCCTCAGAAAACTACCTGTCAAAAGGTGTGTGGAAGGGCAGCTGCTTCGAGGACTTTCAAAATATGGAATGAAGAATATAGTCTCTGCATTTGGCATAATACCCAGAAATAA	CDS
IP_155977.1	RP	NAMPT	ATGGCCTTGGGATTAACGTCTTCAAGGACCCAGTTGCTGATCCCAACAAAAGGTCCAAAAAGGGCCGATTATCTTTACATAGGACGCCAGCAGGGAATTTTGTTACACTGGAGGAAGGAAAAGGAGACCTTGAGGAATATGGTCAGGATCTTCTCCATACTGTCTTCAAGAATGGCAAGGTGA	CDS
IP_156007.1	RP	PIK3CG	ATGGGGACAGCAAGAAATTGTGGCCAAAACATACCAATTGTTGGCCAGAAGGGAAGTCTGGGATCAAAGTGCTTTGGATGTTGGGTTAACAATGCAGCTCCTGGACTGCAACTTCTCAGATGA	CDS
IP_156023.1	MS	HBP1	ATGGCTTTTCATGTTACTTACCAAGTGGTGTTTCTGGTTAGGAATCACAGCTGTAAAATTGATTTCAGTTCATCACACTTCTTCATGATGTTGCCCCTAAATTTTGCACACTATATTCTTGTATATTATTTCAAATAA	3'UTR
IP_156212.1	RP	DNAJB9	ATGCTGAAGCAAAATTCAGAGAGATTGCAGAAGCATATGAAACACTCTCAGATGCTAATAGACGAAAAGAGTATGATACACTTGGACACAGTGCTTTTACTAGTGGTAAAGGACAAAGAGGTAGTGGAAGTTCTTTTGAGCAGTCATTTAACTTCAATTTTGATGACTTATTTAAAGACTTTGGCTTTTTTGGTCAAAACCAAAACACTGGATCCAAGAAGCGTTTTGAAAATCATTTCCAGACACGCCAGGATGGTGGTTCCAGTAGACAAAGGCATCATTTCCAAGAATTTTCTTTTGGAGGTGGATTATTTGATGACATGTTTGAAGATATGGAGAAAATGTTTTCTTTTAGTGGTTTTGACTCTACCAATCAGCATACAGTACAGACTGAAAATA…	CDS
IP_156269.1	RP	IFRD1	ATGTATCGTTTTCGATCACAGCTCTTCACGGGGATTTCTGCTGCCGCCACCGCCCACTCTTACCCCCGCCGCTTCTCGACTCTGTTGTTAGCCGAAGACTCGCCTCTCAGCCGCCCGCCGCACAGACGCACGAGTAAAAAGTGCAGCTCCATCGGCTGA	5'UTR
IP_156357.1	RP	MDFIC	ATGGAAATGGAATTCACCACGGGGCCAAACACGGATCCGCAGATAATCGCAAACTTTCAGCACCTGTTTCTCAAAAAATGCATAGAAAAATTCAGTCCAGCTTGTCTGTAA	CDS
IP_156422.1	RP	CAPZA2	ATGGAGAACTTCAGTAGAAACTGCTCTGAGAGCTTACGTAAAAGAACATTACCCGAATGGAGTCTGCACTGTGTATGGCAAAAAAATAGATGGACAGCAAACCATTATTGCATGCATAGAAAGCCATCAGTTCCAAGCAAAAAATTTTTGGAATGGTCGTTGGAGGTCAGAATGGAAGTTTACAATCACTCCTTCAACCACTCAAGTGGTTGGCATCTTGAAAATTCAGGTTCATTATTATGA	CDS
IP_156428.1	RP	CAPZA2	ATGCCCCTCCTGGAGAATTTAATGAGGTTTTCAATGATGTTCGGTTACTGCTTAATAATGACAATCTTCTCAGGGAAGGAGCAGCCCATGCATTTGCACAGTATAACTTGGACCAGTTTACTCCAGTAA	CDS
IP_156529.1	RP	TSPAN12	ATGGGGCTTCTCCCTTACGGGGCTCACAATGGCCAGAGAAGATTCCGTGAAGTGTCTGCGCTGCCTGCTCTACGCCCTCAATCTGCTCTTTTGGTTAATGTCCATCAGTGTGTTGGCAGTTTCTGCTTGGATGAGGGACTACCTAAATAA	5'UTR
IP_156897.1	RP	METTL2B	ATGATCCTTCTCGGTGTTTTGCCTTTGTTCACGACCTGTGTGATGAAGAGAAGAGTTACCCAGTGCCCAAGGGCAGTCTTGATATTATCATTCTCATATTTGTTCTTTCAGCAGTTGTTCCAGACAAGATGCAGAAGGCTATCAACAGGCTGA	CDS
IP_156899.1	RP	METTL2B	ATGCCTGGGACAATGTGGAGTGGTCGGAAGAGCAAGCCGCGGCGGCGGAGAGAAAAGTCCAGGAGAACAGTATCCAGCGGGTGTGCCAGGAGAAACAAGTTGATTATGAGATCAATGCCCACAAATACTGGAATGACTTCTACAAAATCCACGAAAATGGGTTTTTCAAGGATAGACATTGGCTTTTTACCGAATTCCCTGAGCTGGCACCTAGCCAAAATCAAAATCATTTGA	CDS
IP_156945.1	RP	CALU	ATGAGCCTCAGCTCAGTGACAAGGTTCACAATGATGCTCAGAGTTTTGATTATGACCATGATGCCTTCTTGGGTGCTGAAGAAGCAAAGACCTTTGATCAGCTGA	CDS
IP_156949.1	RP	CALU	ATGGGAAGATGGACAAGGAAGAGACCAAAGACTGGATCCTTCCCTCAGACTATGATCATGCAGAGGCAGAAGCCAGGCACCTGGTCTATGAATCAGACCAAAACAAGGATGGCAAGCTTACCAAGGAGGAGATCGTTGACAAGTATGACTTATTTGTTGGCAGCCAGGCCACAGATTTTGGGGAGGCCTTAG	CDS
IP_157019.1	RP	ATP6V1F	ATGACATTGGCATCATCCTCATCAACCAGTACATCGCAGAGATGGTGCGGCATGCCCTGGACGCCCACCAGCAGTCCATCCCCGCTGTCCTGGAGATCCCCTCCAAGGAGCACCCATATGACGCCGCCAAGGACTCCATCCTGCGCAGGGCCAGGGGCATGTTCACTGCCGAAGACCTGCGCTAGGGGACTCCTCATAGCCCTCAGCCCTTCCCTCGTTTCCAGGCCTCTCCCCAGGCTTGCCATCAGCCTTCTTTACTTTTTGAGCCTCTGA	CDS
IP_157055.1	RP	TNPO3	ATGTTCTGTTCAGGTTATGGCATTGAAAAAGCTGTTGTCTCAAGAGCCCAGCAATGGCATATCCTCAGATCCCACAGTGTTCTTAGATCGCCTTGCAGTGATATTTAG	CDS
IP_157091.1	MS	AHCYL2	ATGATGAGACATCGCCCAGGGACAAGCAGCAAAAGAACTCTAAGGGAAGCAGTGACTTCTGTGTTAAGAACATCAAACAGGCAGAGTTTGGACGAAGAGAAATTGAAATTGCTGAACAAGAAATGCCTGCATTGA	CDS
IP_157131.1	RP	NRF1	ATGAATATACTACTCGTGTGGGACAGCAAGCTATTGTCCTCTGTATCTCACCCTCCAAACCTAACCCTGTCTTTAAAGTGTTTGGTGCAGCACCTTTGGAGAATGTGGTGCGTAAGTACAAGAGCATGA	CDS
IP_157142.1	RP	UBE2H	ATGGTGACGCTGCAGCCATGTACCTCCACCGACCAGAAGAATACAAGCAGAAAATTAAAGAGTACATCCAGAAATACGCCACGGAGGAGGCGCTGA	CDS
IP_157180.1	RP	KLHDC10	ATGGGCTTTGCTCAGCTGTCGGGGGAAGAAACCCAGTCGTATATATGGACAGGCTATGGCCATCATCAATGGCTCCCTTTATGTCTTTGGAGGTACAACCGGCTATATTTACAGCACAGACCTGCACAAGTTAGATCTCAATACCAGAGAGTGGACACAACTGAAACCAAACAACCTATCCTGTGA	CDS
IP_157298.1	RP	MKLN1	ATGAAATACACGTCTTATCTGGACTCAGCAAAGATAAGGAAAAGAGGGAAGAAAATGTTAGAAATTCATTCTGGATTTATGACATTGTGA	CDS
IP_157371.1	MS and RP	CHCHD3	ATGCATTCTACAAAGAACAGCTGGCTAGACTGGAGGAGAGGAGCTCAGAGTTCTACAGAGTCACCACTGAACAATATCAGAAAGCTGCTGAAGAGGTGGAAGCAAAGTTCAAGCGATATGAGTCTCATCCAGTCTGTGCTGATCTGCAGGCCAAAATTCTTCAGTGTTACCGTGAGAACACCCACCAGACCCTCAAATGCTCCGCTCTGGCCACCCAGTATATGCACTGTGTCAATCATGCCAAACAGAGCATGCTTGAGAAGGGAGGATAAAAACTTTCAGAATGAGCAAAACACCATCAACGTTAATTCCAGAGATGGAACATTTTTTTTCCTAGTGAGAAAACAACCCATTTGA	CDS
IP_157375.1	RP	EXOC4	ATGCCAGCACTGGACGAGAGTTTGCAGCCTTTTTTGCCAAGAAGAAACCTCAAAGGCCAAAAAATTCTCTTTTCAAGTTCGAATCGTCCTCCCATGCCATCAGTATGA	CDS
IP_157378.1	RP	EXOC4	ATGAAATTGAGAATATCAAGCAAGTGCCTCAAAAGCTGGAACAGTGCATGGCCAGCAAGCACTATCTCAGTGCCACTGACATGTTGGTGTCAGCAGTTGAGTCTTTGGAGGGCCCCCTGCTCCAGGTGGAAGGACTGA	CDS
IP_157444.1	RP	CALD1	ATGATTTTGAGCGTCGCAGAGAACTTAGAAGGCAAAAGAGGGAGGAGATGCGACTCGAAGCAGAAAGAATCGCCTACCAGAGGAATGACGATGATGAAGAGGAGGCAGCCCGGGAACGGCGCCGCCGAGCCCGACAGGAACGGCTGCGGCAGAAGCAGGAGGAAGAATCCTTGGGACAGGTGA	CDS
IP_157493.1	RP	WDR91	ATGCGGAGTGTCAGAGGACTAACCAGGTTCAAGAAGAAAATGAAGTTCTGCGTCAGAAGCTTTTTGCATTGCAAGCTGAAATCCACCGACTGA	CDS
IP_157514.1	RP	CNOT4	ATGAATTGGGGGATGAGGCGGCCAGCTTCACAAAAGAGGAAATGCAGGCGGGTAAACACCAAGAATATGAACAGAAGCTACTTCAAGAATTATATAAATTAA	CDS
IP_157531.1	RP	NUP205	ATGTTCAACAGCATGAGAAGGTTCAGAAAGCCAGTACAGAGGGAGTCGCCATTCAGGGTCAACAGGGAACTCGACTTCTTCCTGAACAGCTCATTAAAGAAGCCTTTATTCTCAGTGACCTTTTTGATATTGGAGAATTGGCAGCTGTTGAGCTTCTTCTTGCTGGAGAGCATCAACAGCCACATTTTCCTGGCCTTACCAGAGGATTAG	CDS
IP_157536.1	MS and RP	NUP205	ATGAGTTTGAGAAACTACAGCGAGAGAGAGGTTTGGGCAGTGAAAAACATCGCAAAGAGGTTTCTGATCTCATTAAGGAGTGCAGGCAGTCTCTTGCAGAAAGCCTTTTTGCCTGGGCTTGCCAGTCACCTTTAG	CDS
IP_157784.1	RP	LUC7L2	ATGAAATTGCATCCAAAGAACAAGATTTTTTCTTTGAACTTGATGCCATGGATCATCTGCAGTCATTCATTGCAGATTGTGATCGTAGAACAGAAGTGGCCAAGAAAAGATTAG	CDS
IP_157905.1	MS	KDM7A	ATGCTGTGCTCACTTCTCAGGACTGTATGGCTTTTGGGGGGAACTTCCTGCACAACCTTAACATTGGCATGCAGCTCAGGTGTTATGAGATGGAGAAAAGGCTAA	CDS
IP_157938.1	RP	MKRN1	ATGCTGCAGTGGGAGAGTGCCGATACGGGGAGAACTGTGTGTATCTCCACGGAGATTCTTGTGACATGTGTGGGCTGCAGGTCCTGCATCCAATGGATGCTGCCCAGAGATCGCAGCATATCAAATCGTGCATTGAGGCCCATGAGAAGGACATGGAGCTCTCATTTGCCGTGCAGCGCAGCAAGGACATGGTGTGTGGGATCTGCATGGAGGTGGTCTATGAGAAAGCCAACCCCAGTGAGCGCCGCTTCGGGATCCTCTCCAACTGCAACCACACCTACTGTCTCAAGTGCATTCGCAAGTGGAGGAGTGCTAAGCAATTTGAGAGCAAGATCATAA	CDS
IP_157939.1	RP	MKRN1	ATGAAGGACGTGGGAGCTGCCCATTTGGAGGGAACTGTTTTTACAAGCATGCGTACCCTGATGGCCGTAGAGAGGAGCCACAGAGACAGAAAGTGGGAACATCAAGCAGATACCGGGCCCAACGAAGGAACCACTTCTGGGAACTCATTGAGGAAAGAGAGAACAGCAACCCCTTTGACAACGATGAAGAAGAGGTTGTCACCTTTGAGCTGGGCGAGATGTTGCTTATGCTTTTGGCTGCAGGTGGGGACGACGAACTAA	CDS
IP_158065.1	RP	SSBP1	ATGAGATGTGGCGATCAGGGGATAGTGAAGTTTACCAACTGGGTGATGTCAGTCAAAAGACAACATGGCACAGAATATCAGTATTCCGGCCAGGCCTCAGAGACGTGGCATATCAATATGTGA	CDS
IP_158217.1	RP	CASP2	ATGTGGGGGAAGCGACGGCCCCCGGTTTGTTTGGGCTGTGGGCGGTGCGCAGCGGAGAGCCCGGGAAAAGCGGGAAATGGCGGCGCCGAGCGCGGGGTCTTGGTCCACCTTCCAGCACAAGGAGCTGATGGCCGCTGA	5'UTR
IP_158499.1	RP	PDIA4	ATGATGCAAACTTTGATAATTTTGTGGCTGACAAAGACACAGTGCTGCTGGAGTTTTATGCTCCATGGTGTGGACATTGCAAGCAGTTTGCTCCGGAATATGAAAAAATTGCCAACATATTAA	CDS
IP_158918.1	MS	AGAP3	ATGAAGGAGGCCCCCCTGAGCTCCAGTTTGCTGCCTGGGTGGATGCAGTGGTGTTTGTGTTCAGCCTGGAGGATGAAATCAGTTTCCAGACGGTGTACAACTACTTCCTGCGTCTCTGCAGCTTCCGCAACGCCAGCGAGGTGCCCATGGTGCTTGTGGGCACGCAGGATGCCATCAGCGCTGCGAATCCCCGGGTTATCGACGACAGCAGAGCCCGCAAGCTCTCCACAGATCTGA	5'UTR
IP_158972.1	MS	SMARCD3	ATGACTCTCCAGGTGCAGGACCCTGCCATCTATGACTCCAGGTCTTCAGCACCCACCCACCGTGGTACAGCGCCCCGGGATGCCGTCTGGAGCCCGGATGCCCCACCAGGGGGCGCCCATGGGCCCCCCGGGCTCCCCGTACATGGGCAGCCCCGCCGTGCGACCCGGCCTGGCCCCCGCGGGCATGGAGCCCGCCCGCAAGCGAGCAGCGCCCCCGCCCGGGCAGAGCCAGGCACAGAGCCAGGGCCAGCCGGTGCCCACCGCCCCCGCGCGGAGCCGCAGTGCCAAGAGGAGGAAGATGGCTGA	5'UTR
IP_159199.1	RP	RBM33	ATGATGACTTTGACCAGTTTGATAAGCCTGGCGCGGAACGGTCGTGGAGAAGAAGAGCTGCTGATGAGGACTGGGACAGTGAACTTGAAGATGATTTACTTGGAGAAGATTTGCTATCTGGCAAAAAGAATCAGTCGGATTTGTCAGATGAAGAGCTAA	CDS
IP_161632.1	MS	MICU3	ATGGCAATGAGATGGTGGATAAAAAAGAGTTTTTGGTGCTTCAAGAGATATTCAGGAAAAAAAATGAAAAGAGAGAAATTAAAGGAGATGAAGAAAAGCGTGCAATGCTGCGTCTTCAACTTTATGGATACCATTCTCCTACTAATAGTGTACTTAAAACAGATGCTGAGGAACTTGTCTCCAGAAGCTATTGGGATACACTGA	CDS
IP_161679.1	MS and RP	CNOT7	ATGATGCCAAATATTGTGGTCATTTGTATGGCCTTGGTTCTGGTTCATCCTATGTACAGAATGGCACAGGGAATGCATATGAAGAGGAAGCCAACAAGCAGTCATGACATGAAATAG	CDS
IP_161782.1	RP	PCM1	ATGGAAGTGGAGAAGATGAAAATGAGGATGAAGAAATGGAAGAATTTGAAGAAGGCCCTGTGGATGTCCAGACTTCCCTCCAGGCTAACACTGAAGCTACTGAAGAAAATGAACATGATGAACAGGTCCTACAACGTGACTTTAAAAAGACAGCAGAAAGCAAAAATGTCCCATTGGAACGAGAAGCCACTAGTAAAAATGACCAAAATAACTGTCCTGTGA	CDS
IP_161784.1	RP	PCM1	ATGAAGAAGGAGATGAAGACGGTTACCTTTCTGAAGGAATTGTTCGGACAGATGAAGAGGAGGAAGAAGAGCAAGATGCCAGTTCCAATGATAACTTTTCTGTGTGTCCTTCTAACAGTGTGA	CDS
IP_161787.1	RP	PCM1	ATGATCAGGATTTACCAAACTGGAGTAATGAGAATGTTGATGACAGGCTCAACAATATGGATTGGGGTGCCCAACAGAAGAAAGCAAATAGATCATCAGAAAAGAATAAGAAAAAGTTTGGTGTAG	CDS
IP_161811.1	RP	ASAH1	ATGTATATGAACTCGATGCTAAGCAGGGTAGATGGTATGTGGTACAAACAAATTATGACCGTTGGAAACATCCCTTCTTCCTTGATGATCGCAGAACGCCTGCAAAGATGTGTCTGA	CDS
IP_161934.1	RP	ATP6V1B2	ATGATCTTCTCTACTTGGAATTTCTGCAGAAGTTTGAGAGGAACTTCATTGCTCAGGGTCCTTACGAAAATCGCACTGTCTTTGAGACTTTGGACATTGGCTGGCAGCTACTCCGAATCTTCCCCAAAGAAATGCTGA	CDS
IP_162083.1	MS	LGI3	ATGCCGCCTTCTCAGAGATCCAGGATGGAGCGTTCTCCCACCTCCCGCTGCTGCAGTTCTTGTTACTCAACTCCAACAAGTTTACACTGA	CDS
IP_162225.1	RP	CCAR2	ATGGACGGTTGGATCAGGGCCGAAGTGATGACTATGACTCCAAGAAACGCAAACAGCGGGCTGGTGGAGAGCCCTGGGGTGCTAAGAAGCCAAGGCATGACCTGCCTCCTTACCGGGTCCACCTCACTCCTTACACTGTGGACAGCCCCATCTGTGACTTCCTAG	CDS
IP_162451.1	MS	ADAM7	ATGAATGTGATTTTCCTGAGATGTGCACTGGCCACTCGCCTGCCTGTCCTAAGGACCAGTTCAGGGTCAATGGATTTCCTTGCAAGAACTCAGAAGGCTACTGTTTCATGGGGAAATGTCCAACTCGTGAGGATCAGTGCTCTGAACTATTTGATGATGAGGCAATAG	CDS
IP_162752.1	RP	ESCO2	ATGGCAAGTTATTTGCAACCAAGTACTGCAACACCCCTAATTTCCTCGTATATAATTTTAATAGTTAAAGCTGATTTCAGTTATAAAGGAGTTACTATCTGGATAAGTTCAAAGAGCTCCTTATTATAA	CDS
IP_163013.1	RP	LEPROTL1	ATGTGCCCTTCCAATATACAACAAATACTGGCCCCTCTTTGTTCTATTTTTTTACATCCTTTCACCTATTCCATACTGCATAGCAAGAAGATTAGTGGATGA	CDS
IP_163191.1	MS	TTI2	ATGACTATCAGACTGAGAACAAAATCCTGGGTGTACACTGTCTCCATCACATTGTGCTTAATGTGCCAGCTGCTGATTTGCTCCAGTATAACAGAGCCCAGGTCCTATACCATGCCATTTCCAACCACCTGTACACACCAGAGCACCACCTCATTCAGGCTGTGCTCCTGTGTCTGCTGGATTTATTCCCCATCCTGGAGAAAACCCTGCACTGGAAAGGAGATGGAGCTCGACCCACCACCCATTGTGATGAGGTCCTGCGGCTGA	CDS
IP_163338.1	RP	ASH2L	ATGGTGTCAATCAAGGTGTGGCTTACAAAGATATTTTTGAGGGGGTTTACTTCCCAGCCATCTCACTGTACAAGAGCTGCACGGTTTCCATTAACTTTGGACCATGCTTCAAGTATCCTCCGAAGGATCTCACTTACCGCCCTATGA	CDS
IP_163375.1	RP	BAG4	ATGATGATTCAGATCTTTTGGATTCCCAAGTCCAGTATAGTGCTGAGCCTCAGCTGTATGGTAATGCCACCAGTGACCATCCCAACAATCAAGATCAAAGTAGCAGTCTTCCTGAAGAATGTGTACCTTCAGATGAAAGTACTCCTCCGAGTATTAAAAAAATCATACATGTGCTGGAGAAGGTCCAGTATCTTGAACAAGAAGTAG	CDS
IP_163593.1	RP	ADAM9	ATGAAGCCTATAGTGCTCCCTCCTGTGGTAATAAGTTGGTGGACGCTGGGGAAGAGTGTGACTGTGGTACTCCAAAGGAATGTGAATTGGACCCTTGCTGCGAAGGAAGTACCTGTAAGCTTAAATCATTTGCTGAGTGTGCATATGGTGACTGTTGTAAAGACTGTCGGTTCCTTCCAGGAGGTACTTTATGCCGAGGAAAAACCAGTGAGTGTGATGTTCCAGAGTACTGCAATGGTTCTTCTCAGTTCTGTCAGCCAGATGTTTTTATTCAGAATGGATATCCTTGCCAGAATAACAAAGCCTATTGCTACAACGGCATGTGCCAGTATTATGATGCTCAATGTCAAGTCATCTTTGGCTCAAAAGCCAAGGCTGCCCCCAAAGATTGTTTCATTG…	CDS
IP_163597.1	MS and RP	ADAM9	ATGACTGTGATGTTCAGAAAAAGTGTCATGGACATGGGGTATGTAATAGCAATAAGAATTGTCACTGTGAAAATGGCTGGGCTCCCCCAAATTGTGAGACTAAAGGATACGGAGGAAGTGTGGACAGTGGACCTACATACAATGAAATGA	CDS
IP_163746.1	RP	KAT6A	ATGAGGGCGCCTACCAGGACTGTGAGGAAACTCTTGCGGCGTGTCAGACCCTGCAGAGTTACACCCAGGCTGACGAGGACCCTCAGATGTCCATGGTTGAAGACTGTCATGCGTCAGAACATAATAGCCCTATCTCCTCCGTTCAGTCTCACCCCAGCCAGTCAGTCCGTTCGGTCAGCAGTCCCAACGTGCCTGCCCTTGAGAGTGGCTACACCCAGATCAGCCCAGAACAAGGATCCCTGTCCGCACCCTCTATGCAGAACATGGAGACCAGCCCCATGA	CDS
IP_163751.1	RP	KAT6A	ATGTGTCTGCATTATTCGGAGGCAGTGCTGCCTCTGGCTTTCACCAGCAGTTACGATTGGCTATCAAACGTGCCATTGGCCACGGCAGACTCCTTAAAGATGGACCTCTTTATCGGCTCAACACTAAAGCAACCAACGTGGATGGGAAAGAGAGTTGTGAGTCTCTTTCCTGTTTACCTCCAGTGTCCCTTCTTCCACATGAAAAGGATAAGCCGGTTGCTGAACCAATCCCCATCTGTAGTTTCTGTCTTGGTACAAAAGAACAAAACCGAGAAAAGAAGCCAGAGGAACTCATCTCCTGTGCCGACTGTGGCAACAGTGGCCATCCATCCTGTTTAA	CDS
IP_163921.1	RP	FNTA	ATGATGGCCCCAATCCCGTGGTCCAGATCATTTATAGTGACAAATTTAGAGATGTTTATGATTACTTCCGAGCTGTCCTGCAGCGTGATGAAAGAAGTGAACGAGCTTTTAAGCTAA	CDS
IP_164101.1	RP	PCMTD1	ATGGGATTGAGCTTCATTCAGATGTGGTGGAATATGCCAAGGAAAAACTGGAGAGCTTCATCAAAAATAGTGATAGCTTTGATAAATTTGAGTTCTGTGAACCTGCATTTGTTGTTGGTAATTGCCTCCAGATAG	CDS
IP_164160.1	RP	ATP6V1H	ATGATGAAGATATCAGCGAAGATATCAAATTTCTTTTGGAAAAACTTGGAGAGAGTGTCCAGGACCTTAGTTCATTTGATGAATACAGTTCAGAACTTAAATCTGGAAGGTTGGAATGGAGTCCTGTGCACAAATCTGAGAAATTTTGGAGAGAGAATGCTGTGA	CDS
IP_164277.1	RP	LYN	ATGGCTTGTGCAGAAGATTGGAGAAGGCTTGTATTAGTCCCAAGCCACAGAAGCCATGGGATAAAGATGCCTGGGAGATCCCCCGGGAGTCCATCAAGTTGGTGA	CDS
IP_164347.1	RP	IMPAD1	ATGAGAAGACCCCAAGGATCGTTGTGTCTCGTTCCCATTCAGGGATGGTCAAACAGGTCGCTCTTCAGACTTTTGGAAACCAGACTACAATTATCCCAGCTGGTGGTGCTGGTTATAAAGTTTTAG	CDS
IP_164399.1	RP	TOX	ATGTGCCAGCCAGCCAGTCCTACCCTGGTCCAAGCCTGGAAAGTGAAGACTTCAACATTCCACCAATTACTCCTCCTTCCCTCCCAGACCACTCGCTGGTGCACCTGA	CDS
IP_164439.1	MS	CHD7	ATGGTGCACTCATGGATGAGGAGGATGAAGGGTCTAAATTCTGTGAAGAAGATATTGATCAGATCCTCCTACGTCGAACCCACACCATTACCATTGAGTCAGAAGGGAAAGGTTCCACATTTGCTAAGGCCAGTTTTGTTGCATCTGGAAATAGGACAGATATTTCCTTGGATGATCCAAATTTCTGGCAAAAGTGGGCTAAGAAGGCTGAATTGGATATTGATGCCTTAA	CDS
IP_164532.1	MS and RP	GGH	ATGGCAAGATTGAGTTTATTTCAACAATGGAAGGATATAAGTATCCAGTATATGGTGTCCAGTGGCATCCAGAGAAAGCACCTTATGAGTGGAAGAATTTGGATGGCATTTCCCATGCACCTAATGCTGTGA	CDS
IP_164543.1	RP	YTHDF3	ATGCGTATGCTGGTGTCTGGTCTCAGGATAAGTGGAAGGGCAAATTTGAAGTTAAATGGATCTTTGTCAAAGATGTTCCCAATAACCAATTACGGCATATTCGCTTAG	CDS
IP_164545.1	RP	YTHDF3	ATGACTTTGCACATTATGAAAAGCGTCAAGAAGAGGAGGAAGCCATGCGTAGGGAGAGAAATAGAAACAAACAATAACCGTATGAAGATGTCCTGTTAA	CDS
IP_164547.1	MS	YTHDF3	ATGGATTTAACTTTTTTCCTGGTAATGCTGATTTCTCTACATGGGGGACAAGTGGATCTCAGGGACAATCAACACAAAGTTCTGCTTATAGTAGCAGTTATGGCTATCCACCTAGTTCTCTTGGGAGAGCTATTACTGATGGACAGGCTGGATTTGGCAATGATACTTTGA	CDS
IP_164667.1	RP	VCPIP1	ATGGTGCTCACGCCCAAAGAGTTGGAGATGTTCAAGGACAAGAATCAGAGTCTCAGCTCCCAACTAAAATTATTCTTACTGGACAGAAAACAAAAACTTTGCACAAGGAGGAGTTAA	CDS
IP_164670.1	RP	VCPIP1	ATGCACTGGGAGCAGCCTTTGCCACAAGGTCAAAAGCACAAAGGGGAAATTCCGTGGAGGAGCTTGAAGAGATGGATAGTCAAGATGCTGAGATGA	CDS
IP_164886.1	RP	TRAM1	ATGCTTTTCCTGAACTCTACTTCCAGAAAACCAAAAAAGAAGATATTCCTCGTCAGCTTGTCTACATTGGTCTTTACCTCTTCCACATTGCTGGAGCTTACCTTTTGA	CDS
IP_164888.1	RP	TRAM1	ATGTCACCCTCCCAGCAACAGAAGAACAAGCTACTGAATCAGTGTCCCTTTATTACTATGGCATCAAAGATTTGGCTACTGTTTTCTTCTACATGCTAG	CDS
IP_164889.1	RP	TRAM1	ATGAATCTGGTCAGCTTAGTGCGTTCTACCTTTTTGCCTGTGTTTGGGGCACATTCATTCTCATCTCTGAAAACTACATCTCAGACCCAACTATCTTATGGAGGGCTTATCCCCATAACCTGA	CDS
IP_165027.1	MS and RP	TCEB1	ATGAGGTCAATTTTAGAGAGATACCTTCACATGTGCTATCGAAAGTATGCATGTATTTTACGTACAAGGTTCGCTACACTAACAGCTCCACCGAGATTCCTGAATTCCCAATTGCACCTGAAATTGCACTGGAACTGCTGA	CDS
IP_165392.1	MS	LRRCC1	ATGGAAACAGAAAAGAATGCAATAGAAAAGTTCCTCGAAGATCAAAAATCCCTTATGATGCCAAAACCATTCAAACTATTAAGCACCACAATAAAAACTACAACTCTTTTGTAA	CDS
IP_165742.1	RP	KIAA1429	ATGATCAAGATGAGGAGGAAGGTCTCCAATCTGATGGTGTTATTGATGATGCATTTGCCTTGTGGCTACAGGACTCAACACAGACATTGCAATGTATTACAGAACTGTTCAGCCATTTTCAGCGTTGTACAGCCAGTGAAGAAACAGACCATTCAGATCTCTTGGGAACCCTGCACAATCTTTATTTGA	CDS
IP_165812.1	RP	TP53INP1	ATGCTGTGCATAACTCCTGCCCTGGTCTCAGTGAGGCCACCCGTGGGACTGATGAATTACATAGCCCAAGTAGTCCCAGAGTGGAAGCTCAAAATGAAATGGGGCAGCATATTCATTGTTATGTTGCAGCTCTTGCTGCTCATACAACTTTTCTGGAACAACCCAAGAGCTTTCGCCCTTCCCAGTGGATAA	CDS
IP_165883.1	MS and RP	PTDSS1	ATGCAGAACACTATGGTCACCGAGAAAAGACCTACTCGGAGTGTGAAGATGGCACCTACAGTCCAGAGATCTCCTGGCATCACAGGAAAGGGACAAAAGGTTCTGAAGACAGCCCACCCAAGCATGCAGGCAACAACGAAAGCCATTCTTCCAGGAGAAGGAATCGGCATTCCAAGTCAAAAGTCACCAATGGCGTTGGAAAGAAATGAAAAACCCTGGTTAATCAAAGATGTTCCAGAGTGCCTAGAACTGAGAGGGAAATGGAACTCATTTGGAACTCCCCGTGAGGAGGTCGAGGCGCACAGGGCAAGCAGGAAGAGGCGAGGGCACTTGGGGGTCATTATTTGA	CDS
IP_165923.1	RP	MTDH	ATGAAAAGTCAAAGAAAAATAAGAAGAAATCAAAGTCAGATGCTAAAGCAGTGCAAAACAGTTCACGCCATGATGGAAAGGAAGTTGATGAAGGAGCCTGGGAAACTAAAATTAGTCACAGAGAGAAACGACAGCAGCGTAAACGTGATAAGGTGCTGA	CDS
IP_165925.1	MS	MTDH	ATGATCAAAAGGTCTCAGATGATGATAAAGAAAAGGGAGAGGGAGCTCTTCCAACTGGGAAATCCAAAAAGAAAAAAAAGAAAAAGAAGAAGCAAGGTGAAGATAACTCTACTGCACAGGACACAGAAGAATTAG	CDS
IP_165933.1	RP	MTDH	ATGCTAATACAAATGGAAAAGACTGGGGAAGGAGTTGGAGTGACCGTTCAATATTTTCTGGCATTGGGTCTACTGCTGAGCCAGTTTCTCAGTCTACCACTTCTGATTATCAGTGGGATGTTAGCCGTAATCAACCCTATATCGATGATGAATGGTCTGGGTTAA	CDS
IP_166109.1	RP	RNF19A	ATGGCGGGGTGGATGGAATTGCAAGTATTGAAAGTATACATTCTGAAATGTGTACTGATAAGAACTCCATTTTCTCTACAAATACCTCTTCTGACAATGGATTAA	CDS
IP_166140.1	RP	PABPC1	ATGATACATTTTCTGCTTTTGGTAACATCCTTTCATGTAAGGTGGTTTGTGATGAAAATGGTTCCAAGGGCTATGGATTTGTACACTTTGAGACGCAGGAAGCAGCTGAAAGAGCTATTGAAAAAATGA	CDS
IP_166203.1	RP	UBR5	ATGTATTCATGGGAATGGTTTGCCCATCAGGTACCAACCCTGATGACTCTCCTTTATATGTTTTATGTTGTAATGACACTTGCAGTTTTACATGGACTGGAGCAGAGCACATTAACCAGGATATTTTTGAGTGTCGAACTTGTGGCTTGCTGGAGTCACTGTGTTGTTGTACGGAATGTGCAAGGGTTTGTCATAAAGGTCATGATTGCAAACTCAAACGGACATCACCAACAGCCTACTGTGATTGTTGGGAGAAATGTAAATGTAAAACTCTTATTGCTGGACAGAAATCTGCTCGTCTTGATCTACTTTATCGCCTGCTCACTGCTACTAATCTGGTTACTCTGCCAAACAGCAGGGGAGAGCACCTCTTACTATTCTTAG	CDS
IP_166209.1	RP	UBR5	ATGATGAAGATGGAGATGATGGGGATGATACAGCCAGCGAATCTTATTTGCCTGGAGAGGATCTTATGTCTCTCCTTGATGCCGACATTCATTCTGCCCACCCAAGTGTCATTATTGATGCAGATGCCATGTTTTCTGAAGACATTAGCTATTTTGGTTACCCTTCTTTTCGTCGTTCATCACTTTCCAGGCTAG	CDS
IP_166212.1	RP	UBR5	ATGGAAATCGAAATATTTTGCATGCTTGTGTATCAGTTTGCTTTCCAACCAGCAATAAAGAAACTAAAGAAGAAGAGGAAGCGGAGCGTTCTGAAAGAAATACATTTGCAGAAAGGCTTTCTGCTGTTGAGGCCATTGCAAATGCAATATCAGTTGTTTCAAGTAATGGCCCAGGTAATCGGGCTGGATCATCAAGTAGCCGAAGTTTGA	CDS
IP_166214.1	RP	UBR5	ATGATCCTGAGCCTTTGCCAGCACATCGGCAGGCACTTGGAGAGAGGCTTTATCCTCGTGTACAAGCAATGCAACCAGCATTTGCAAGTAAAATCACTGGCATGTTGTTGGAATTATCCCCAGCTCAGCTGCTTCTCCTTCTAG	CDS
IP_166216.1	RP	UBR5	ATGATACAGATGATGGTGATGACAATGCCCCTTTGTTTTACCAACCTGGGAAAAGAGGATTTTATACTCCAAGGCCTGGCAAGAACACAGAAGCAAGGTTGA	CDS
IP_166242.1	RP	AZIN1	ATGTGGGAGATTGGCTTATCTTTGATAACATGGGAGCAGATTCTTTCCATGAACCATCTGCTTTTAATGATTTTCAGAGGCCAGCCATTTATTACATGA	CDS
IP_166297.1	RP	SLC25A32	ATGAAGGTGTGCGTGGATTATATAAGGGATTTGTTCCTGGGCTGTTTGGAACATCGCATGGTGCCCTTCAGTTTATGGCATATGAATTGCTGA	CDS
IP_166343.1	MS	RIMS2	ATGCAAGGAAAAGAAGCCCATCTGTGTCCAGAGATCAGAATAGAAGATACGACCAAAGGGAAGAAAGAGAGGAATATTCACAGTATGCTACTTCGGATACCGCAATGCCTAGATCTCCATCAGATTATGCTGATAGGCGATCTCAACATGAACCTCAGTTTTATGAAGACTCTGATCATTTAA	CDS
IP_166378.1	MS	LRP12	ATGGGTTCTGTTTGCCATGGGAAATACCCTGTGGAGGTAACTGGGGGTGTTATACTGAGCAGCAGCGTTGTGATGGGTATTGGCATTGCCCAAATGGAAGGGATGAAACCAATTGTACCATGTGCCAGAAGGAAGAATTTCCATGTTCCCGAAATGGTGTCTGTTATCCTCGTTCTGATCGCTGCAACTACCAGAATCATTGCCCAAATGGCTCAGATGAAAAAAACTGCTTTTTTTGCCAACCAGGAAATTTCCATTGTAAAAACAATCGTTGTGTGTTTGAAAGTTGGGTGTGTGATTCTCAAGATGACTGTGGTGATGGCAGCGATGAAGAAAATTGCCCAGTAA	CDS
IP_166452.1	RP	EMC2	ATGAGTATCTGGAACAATTTGTTGGAGACCAAGAAGCCTGGCATGAACTTGCAGAACTTTACATCAATGAACATGACTATGCAAAAGCAGCCTTTTGTTTAG	CDS
IP_166624.1	RP	UTP23	ATGCCAAGAAGCATCTTGGCTTCTTCCGCAACAACTTCGGAGTCCGCGAGCCGTACCAGATCCTGCTGGACGGCACCTTCTGTCAGGCGGCGCTGCGGGGCCGCATCCAGCTGCGGGAGCAGCTGCCCCGCTACCTCATGGGGGAGACGCAGCTGTGCACCACAAGATGTGTGTTAA	CDS
IP_166638.1	RP	RAD21	ATGATGAAGAGGAAGAGGATGAAGATGCATCAGGGGGCGATCAAGATCAGGAAGAAAGAAGATGGAACAAAAGGACTCAGCAGATGCTTCATGGTCTTCAGCGTGCTCTTGCTAAAACTGGAGCTGAATCTATCAGTTTGCTTGAGTTATGTCGAAATACGAACAGAAAACAAGCTGCCGCAAAGTTCTACAGCTTCTTGGTTCTTAAAAAGCAGCAAGCTATTGAGCTGA	CDS
IP_166670.1	RP	EXT1	ATGGCTTGCACCACCCCAGTCCGGATCATTTCTGGCCCCGCTTCCCGGACGCTCTGCGCCCCTTCGTTCCTTGGGATCAATTGGAAAACGAGGATTCCAGCGTGCACATTTCCCCCCGGCAGAAGCGAGATGCCAACTCCAGCATCTACAAAGGCAAGAAGTGCCGCATGGAGTCCTGCTTCGATTTCACCCTTTGCAAGAAAAACGGCTTCAAAGTCTACGTATACCCACAGCAAAAAGGGGAGAAAATCGCCGAAAGTTACCAAAACATTCTAG	CDS
IP_166912.1	RP	ATAD2	ATGAAGACTTTGAGCAGCTCTGTGAAGAAATTCAGGAATCTAGAAAGAAAAGAGGTTGTAGCTCCTCCAAATATGCCCCGTCTTACTACCATGTGA	CDS
IP_167001.1	RP	TRMT12	ATGGAGCTACCAGGGATTCTAGGGGAAAAATGCTGTCACCAGCCACCAAGCCAGAGTGGCAAAGGTGGGCAGAATCTGCAGAAACTCGAATCGCCACTCTTCTTCAGCAGGTGCATGGGAAACCATGGAAGACACAAATTCTGCACATCCAACCAGTGA	CDS
IP_167073.1	MS	KIAA0196	ATGTTGTGGGTGCCCTTCTGTTCCTGGAGGATTATGTTCGGTACACAAAGCTACCCAGGAGGGTTGCTGAAGCACATGTGCCTAATTTCATTTTTGATGAGTTCAGAACAGTGCTGTAACTGTTTTTCCTACTTCTTCAATGGAAGGATTGTCCTTAGATCTTCCCACCATCACAAATGA	CDS
IP_167119.1	RP	MYC	ATGACCTCGACTACGACTCGGTGCAGCCGTATTTCTACTGCGACGAGGAGGAGAACTTCTACCAGCAGCAGCAGCAGAGCGAGCTGCAGCCCCCGGCGCCCAGCGAGGATATCTGGAAGAAATTCGAGCTGCTGCCCACCCCGCCCCTGTCCCCTAGCCGCCGCTCCGGGCTCTGCTCGCCCTCCTACGTTGCGGTCACACCCTTCTCCCTTCGGGGAGACAACGACGGCGGTGGCGGGAGCTTCTCCACGGCCGACCAGCTGGAGATGGTGA	CDS
IP_167151.1	RP	ASAP1	ATGAGAGCGATGATGATCTGGATGACAAACCAAGCCCTATCAAGAAAGAGCGCTCACCCAGACCTCAGAGCTTCTGCCACTCCTCCAGCATCTCCCCCCAGGACAAGCTGGCACTGCCAGGATTCAGCACTCCAAGGGACAAACAGCGGCTCTCCTATGGAGCCTTCACCAACCAGATCTTCGTTTCCACAAGCACAGACTCGCCCACATCACCAACCACGGAGGCTCCCCCTCTGCCTCCTAGGAACGCCGGGAAAGGTCCAACTGGCCCACCTTCAACACTCCCTCTAA	CDS
IP_167180.1	MS	EFR3A	ATGGGCAACAGCTGTATCGGCACATATATTTGGGTTGTAAAGAGGAAGACAACGTTCAGAAAAACTATGAACTACTTTATACTTCTCTTGCTCTTATAA	CDS
IP_167910.1	MS	ZC3H3	ATGCTGTGCGGCCGTTGCACGGGGCCCGGGGGGGCCAGCCTCCTGTCCCGCAGCAGCATGTCCTTGAGAGACAGGTCCAGCTCAGTCAGGGTCAGAACGTGGTCATCAAAGTTAAACCGCCATCAAAGTCTGGCTCTGCCAGTGCCTCAGGGGCCCAGCGGGGCTCTTTGGAAGAATTTGAGGAAACCCCCTGGAGTGACCAAAGGCCCCGGGAAGGTGAAGGTGAGCCCCCTCGGGGACAGCTGCAGCCCTCGAGGCCAACAAGAGCCAGGGGGACCTGCAGTGTGGAAGATCCTCTTCTGGTCTGCCAGAAGGAGCCTGGTAAGCCCAGGATGGTGA	CDS
IP_168055.1	RP	PUF60	ATGACATCAAGAGCGTGTTTGAGGCCTTTGGCAAGATCAAGTCCTGCACACTGGCCCGGGACCCCACAACTGGCAAGCACAAGGGCTACGGCTTCATTGAGTACGAGAAGGCCCAGTCGTCCCAAGATGCTGTGTCTTCCATGA	CDS
IP_168056.1	RP	PUF60	ATGGCCGCTGGTTTGCTGGCCGCAAGGTGGTGGCTGAAGTGTACGACCAGGAGCGTTTTGATAACAGTGACCTCTCTGCGTGACAGTGGTCCCTCTCCCCGGACTTGCACTTGTTCCTTGTTTCCTCTGGGTTTTATAGTGATACAGTGGTGTCCCCGGGGCCAGGCGCGCTCTGCCCAGCCCAGCCTACAGTGCGGATAA	CDS
IP_168109.1	RP	PLEC	ATGTCTCCAATGGAAGCAGTGGCTCGCCCAGCCCTGGGGACACACTGCCCTGGAACCTTGGGAAAACGCAGCGGAGCCGGCGCAGCGGGGGTGGCGCTGGGAGCAACGGGAGTGTCCTGGACCCAGCTGAGCGGGCGGTCATTCGCATCGCAGATGAGCGGGATCGTGTGCAGAAGAAAACCTTCACCAAGTGGGTCAACAAGCACCTCATCAAGGCCCAGAGGCACATCAGTGACCTGTATGAAGACCTCCGCGATGGCCACAACCTCATCTCCCTGCTGGAGGTCCTCTCGGGGGACAGCCTGCCCCGGGAGAAGGGGAGGATGCGTTTCCACAAGCTGCAGAATGTCCAGATTGCCCTGGACTACCTCCGGCACCGCCAGGTGA	CDS
IP_168160.1	RP	GRINA	ATGAAAAGAGTTTTTTGGTGTCTGGGGACAACTATCCTCCCCCCAACCCTGGATATCCGGGGGGGCCCCAGCCACCCATGCCCCCCTATGCTCAGCCTCCCTACCCTGGGGCCCCTTACCCACAGCCCCCTTTCCAGCCCTCCCCCTACGGTCAGCCAGGGTACCCCCATGGCCCCAGCCCCTACCCCCAAGGGGGCTACCCACAGGGTCCCTACCCCCAAGGGGGCTACCCACAGGGCCCCTACCCACAAGAGGGCTACCCACAGGGCCCCTACCCCCAAGGGGGCTACCCCCAGGGGCCATATCCCCAGAGCCCCTTCCCCCCCAACCCCTATGGACAGCCACAGGTCTTCCCAGGACAAGACCCTGACTCACCCCAGCATGGAAACTACCAGGAGG…	CDS
IP_168197.1	MS and RP	CYC1	ATGAAGCTAAGGAGCTGGCTGCGGAGGTGGAGGTTCAAGACGGCCCCAATGAAGATGGGGAGATGTTCATGCGGCCAGGGAAGCTGTTCGACTATTTCCCAAAACCATACCCCAACAGTGAGGCTGCTCGAGCTGCCAACAACGGAGCATTGCCCCCTGACCTCAGCTACATCGTGCGAGCTAGGCATGGTGGTGAGGACTACGTCTTCTCCCTGCTCACGGGCTACTGCGAGCCACCCACCGGGGTGTCACTGCGGGAAGGTCTCTACTTCAACCCCTACTTTCCTGGCCAGGCCATTGCCATGGCCCCTCCCATCTACACAGATGTCTTAG	CDS
IP_168205.1	RP	MAF1	ATGTCGCGGTGGCAGCCCGGATGGGCCGGCAGGGCCGGGAGTAACGGGACGTCGCCGCGGAGCTTCTTCCCCCGGATACAGTGCGGCCCGAGCGGAGGCCGCGGCGCCGCCCTCCGATCTTGA	5'UTR
IP_168244.1	RP	BOP1	ATGATGACGAAGGCGACGAGGAGGGAGAGGACGGAGCCCTTGATGACGAGGGCCACAGTGGGATTAAAAAGACCACTGAGGAGCAGGTGCAGGCCAGCACTCCTTGCCCGAGGACAGAGATGGCGAGCGCCCGGATTGGGGATGAGTATGCGGAGGACAGCTCTGATGAGGAGGACATCCGGAACACGGTGGGCAACGTGCCCTTGGAGTGGTACGATGACTTCCCCCACGTGGGCTACGACCTGGATGGCAGGCGCATCTACAAGCCCCTGCGGACCCGGGATGAGCTGGACCAGTTCCTGGACAAGATGGACGATCCTGACTACTGGCGCACCGTGCAGGACCCGATGA	CDS
IP_169818.1	RP	WASH1	ATGCCCCCTTGTCCATCAGCAAGAGAGAGCAGCTGGAACAGCAGGTCCCAGAGAACTACTTCTATGTGCCAGACCTGGGCCAGGTGCCTGAGATCCATGTTCCATCCTACCTGCCTGACCTGCCCGGCATTGCCAACGACCTCATGTACAGTGCCGACCTGGGCCCCGGCATTGCCCCCTCTGCCCCTGGCACCATTCCAGAACTGCCCACCTTCCACACTGAGGTAG	CDS
IP_169851.1	RP	DOCK8	ATGTGCAGCTTGCCCAGGAGCTCGGGGACTTCACTGATGACGACTTGGACGTGGTGTTCACGCCAAAGGAATGTAGGACTTTGCAGCCCTCTTTGCCGGAGGAAGGGGTTGAACTGGACCCTCATGTCAGGGACTGTGTTCAGACCTACATCCGTGAGTGGCTAA	CDS
IP_169853.1	RP	DOCK8	ATGCTAGCAATGCGATGCCGGTCATCTTTGGAAAATCCAGCGGGCCTGAATTTCTGCAGGAAGTGTACACAGCTGTTACATACCATAATAAGTCTCCTGACTTTTATGAAGAAGTGA	CDS
IP_169858.1	RP	DOCK8	ATGTGGACTCTGTGGTTGGGAGAAGCTCAGTGGGTGAACGGAGGACATTGGCCCAATCTAGAAGGCTTTCTGAAAGAGCCCTCTCCTTGGAGGAAAATGGGGTTGGATCCAACTTCAAAACCTCCACTCTGA	CDS
IP_169949.1	RP	RFX3	ATGTCTATCCCGCTCAGGTGCAGTATGTGGAAGGAAGCGATACTGTCTATACCAATGGAGCAATCCGAACAACAACGTATCCTTACACAGAGACACAGATGTACAGCCAAAATACTGGAGGGAATTACTTTGATACTCAAGGGAGTTCCGCCCAGGTGA	CDS
IP_170038.1	MS	CDC37L1	ATGCCATTAGCAAGGATGTTTTTAATAAGAGTTTTATTAATCAAGATAAAAGAAAAGACACAGAAGATGAAGATAAATCAGAATCATTTATGCAAAAATATGAGCAAAAAATCAGACATTTTGGTATGTTGA	CDS
IP_170040.1	MS and RP	CDC37L1	ATGTGGATCCAAGAGGGTGTTTTCGTTTATTTTTCCAGAAAGCCAAAGCAGAGGAAGAAGGTTATTTTGAAGCATTCAAAAATGAACTTGAAGCTTTCAAGTCAAGAGTAA	CDS
IP_170043.1	RP	AK3	ATGAAGACCAAACAAAGCCAGTCCTGGAATATTACCAGAAAAAAGGGGTGCTGGAAACATTCTCCGGAACAGAAACCAACAAGATTTGGCCCTATGTATATGCTTTCCTACAAACTAAAGTTCCACAAAGAAGCCAGAAAGCTTCAGTTACTCCATGAGGAGAAATGTGTGTAA	CDS
IP_170394.1	MS	ZDHHC21	ATGGCAGCAGACCTTCTCAGAAGTTTTTGGCACTCGTTGGAAGATCCTGTGGTTCATTCCTTTCAGGCAGAGGCAACCACTGCGAGTTCCCTACCACTTTGCCAATCATGTCTAAACAGATGGATGGTGGGCACAGATGGGTCCTCCATGCTGGCAATGCGTTACAGGTTTTATGATAATAGAACTATGACAGTCTTCAAGTCAATTAAAATCCACCCACCAGTCTTAGGCATCATAATGTGCCCCAGGCTTTATTTTAATAGTGATCTTGATCCTGTTGTGGGACTAATACAAGATCTATATTTAAGTTTTAAAGCATGTTTACTTTCAAATTAG	CDS
IP_170467.1	RP	SNAPC3	ATGATAGAGGCTATGGAAAGTTTCAGACTGCTAGAATGGAAGATTTCACCTTCAATGACTTGTGTATTAAACTGGGTTTTCCTTACTTATACTGTCATCAGGGAGACTGTGAACATGTCATTGTCATTACTGACATAA	CDS
IP_170468.1	RP	SNAPC3	ATGATGACTGCTTGGATAGGACATTGTATCCCCTCCTTATCAAGAAGCATTGGCTATGGACCAGAAAATGTTTTGTTTGTAAAATGTATACAGCCAGATGGGTGA	CDS
IP_170473.1	RP	PSIP1	ATGGAGGATCTGATGCTCAAGATGGTAATCAGCCACAACATAACGGGGAGAGCAATGAAGACAGCAAAGACAACCATGAAGCCAGCACGAAGAAAAAGCCATCCAGTGAAGAGAGAGAGACTGAAATATCTCTGA	CDS
IP_170476.1	RP	PSIP1	ATGAGAAAGAAGCAGCAGATCGAAAACGCAAGCAAGAGGAACAAATGGAAACTGAGCAGCAGAATAAAGATGAAGGAAAGAAGCCAGAAGTTAAGAAAGTGGAGAAGAAGCGAGAAACATCAATGGATTCTCGACTTCAAAGGATACATGCTGAGATTAAAAATTCACTCAAAATTGATAATCTTGATGTGA	CDS
IP_170549.1	MS	CNTLN	ATGTTCACACAGCTGAAAGTATATCATATCAAAAACTTTACAATGAGTTACATATTTGTTTTGAAACCACAAAATCAAATGAAGCTATGCTCCGGCAAAGTGTTACTAATCTTCAGGATCAGCTATTACAAAAAGAGCAAGAAAATGCTAAGTTAA	CDS
IP_170623.1	RP	HAUS6	ATGCAAAGAGTATTCTTTGTCAGTATCCTGCTTCACTTCCAGATGCACATAAGCAACATAACCAAGAAAATGGTTGCAGAGGAGACAGTGATACCTTGGGAGCGCTACATGATCTAG	CDS
IP_170629.1	RP	PLIN2	ATGTTAGACTGGGATCCCTGTCTACCAAGCTTCACTCCCGTGCCTACCAGCAGGCTCTCAGCAGGGTTAAAGAAGCTAAGCAAAAAAGCCAACAGACCATTTCTCAGCTCCATTCTACTGTTCACCTGA	CDS
IP_170785.1	RP	KLHL9	ATGACCCAGAAAAAGATGAGTGGCATAAAGTTTTTGATCTTCCAGAGTCACTTGGTGGCATTCGAGCCTGTACACTCACAGTTTTTCCACCTGAAGAAAACCCTGGGTCACCTTCTAGAGAATCACCTCTTTCAGCACCTTCAGATCATTCTTAGGTCTAAGGTGTAA	CDS
IP_170889.1	RP	PLAA	ATGATGCTAGTATTAGAAGGTGGCAAATCACTGGCGAGTGTCTTGAAGTATATTATGGACATACAAATTATATTTATAGCATATCCGTTTTTCCAAATTGTAGAGACTTTGTGA	CDS
IP_170989.1	RP	TOPORS	ATGAAAGATCTTTGCGGAAAATTCAAGAACAAGATATTATTAATTTTAGACGAACTCTTTATCGTGCTGGTGCTCGAGTTAGAAATATTGAAGATGGTGGCCGCTACAGGGATATTTCAGCTGAATTTTTCCGTAGAAATCCAGCTTGCCTTCACAGATTAG	CDS
IP_170991.1	RP	TOPORS	ATGGAAGCAGATACAAATGGGAGTATACTTATTACAGTAGAAACAAGGACAGGGATGGGTACGAATCATCTTACAGGAGGAGGACTCTGTCCAGAGCTCATTATTCTAGACAGTCTTCAAGTCCAGAATTTAGAGTTCAGTCCTTTTCTGAAAGAACAAATGCTAGGAAAAAAAATAATCACAGTGAGAGGAAGTATTACTACTATGAAAGGCACAGATCAAGGAGCCTGTCTAGTAACAGATCAAGGACTGCATCTACCGGGACTGACCGGGTGA	CDS
IP_171044.1	RP	DNAJA1	ATGCTGTTTTTACTCGACGAGGAGAAGACCTTTTCATGTGTATGGACATACAGCTCGTTGAAGCACTGTGTGGCTTCCAGAAGCCAATATCTACTCTTGACAACCGAACCATCGTCATCACCTCTCATCCAGGTCAGATTGTCAAGCATGGAGATATCAAGTGTGTACTAA	CDS
IP_171045.1	RP	DNAJA1	ATGAAGGAGAGAAGTTTAAACAGATTTCTCAAGCTTACGAAGTTCTCTCTGATGCAAAGAAAAGGGAATTATATGACAAAGGAGGAGAACAGGCAATTAAAGAGGGTGGAGCAGGTGGCGGTTTTGGCTCCCCCATGGACATCTTTGATATGTTTTTTGGAGGAGGAGGAAGGATGCAGAGAGAAAGGAGAGGTAAAAATGTTGTACATCAGCTCTCAGTAA	CDS
IP_171070.1	MS	B4GALT1	ATGCTATGTAAACTTGAATTTCCTATGTATTTTTATTGTGGTGTTTTAAATATGGGGAGGGGTATTGAGCATTTTTTAGGGAGAAAAATAAATATATGCTGTAGTGGCCACAAATAG	3'UTR
IP_171086.1	RP	CHMP5	ATGAGCTTCTGGCTGATGAAGACAGTTCTTATTTGGATGAGGCAGCATCTGCACCTGCAATTCCAGAAGGTGTTCCCACTGATACAAAAAACAAGGATGGAGTTCTGGTGGATGAATTTGGATTGCCACAGATCCCTGCTTCATAGATTTGCATCATTCAAGCATATCTTGTAA	CDS
IP_171095.1	RP	NFX1	ATGAAGGAGACTGTGGACCATGCTCTCGCACATCAGTTATTTCCTGCAGATGCTCTTTCAGAACAAAGGAGCTTCCATGTACCAGTCTCAAAAGTGAAGATGCTACATTTATGTGTGACAAGCGGTGTAACAAGAAACGGTTGTGTGGACGGCATAAATGTAATGAGATATGCTGTGTGGATAAGGAGCACAAGTGTCCTTTGA	CDS
IP_171190.1	RP	UBAP2	ATGCAGGGACGCCTCCACCTTTCAGCCTGCCCTCGGTCTTGGGCTCCACTGGGCCCCTGGCCTCGGGAGCGGCCCCTGGCTATGCACCCCCACCATTCCTACACATCTTGCCAGCCCACCAGCAGCCCCACTCACAGCTGCTGCACCACCACCTTCCGCAGGATGCACAGAGTGGCTCGGGTCAGCGCAGCCAGCCCAGCTCCCTGCAGCCCAAGTCTCAAGCCTCCAAACCTGCCTACGGCAACTCTCCATACTGGACAAACTAAACCCAGAAGAGAGGGGTGGGCTGGGGCAAGGCTTATCCTGGGCAGGAGAGAACACACGAGCACGTATTTGGGAGCCCAGTGCCCTTTCCTAGAATTCCCGACATGTGTCAGCCATGCCTCTGTGGGGAGTCTG…	CDS
IP_171203.1	RP	DCAF12	ATGATGGACACAAGGACTGGATCTTTTCCATCGCATGGATCAGCGACACTATGGCAGTGTCTGGCTCACGTGATGGTTCTATGGGACTCTGGGAGGTGA	CDS
IP_171206.1	RP	DCAF12	ATGACCCGCCGTCCTGCTATCCTTCGCTTCCCCCGCCCCATGTGGCTGCGGGGCCGCGGCGGCGCTGCCCACTATGGCCCGGAAAGTAGTTAG	5'UTR
IP_171446.1	RP	VCP	ATGTGCTGCCCATTGATGACACAGTGGAAGGCATTACTGGTAATCTCTTCGAGGTATACCTTAAGCCGTACTTCCTGGAAGCGTATCGACCCATCCGGAAAGGAGACATTTTTCTTGTCCGTGGTGGGATGCGTGCTGTGGAGTTCAAAGTGGTGGAAACAGATCCTAGCCCTTATTGCATTGTTGCTCCAGACACAGTGA	CDS
IP_171449.1	RP	VCP	ATGAAGCCATCAATGAGGACAACAGTGTGGTGTCCTTGTCCCAGCCCAAGATGGATGAATTGCAGTTGTTCCGAGGTGACACAGTGTTGCTGA	CDS
IP_171472.1	RP	STOML2	ATGCCAGCATTGTGGATGCCATCAACCAAGCTGCTGACTGCTGGGGTATCCGCTGCCTCCGTTATGAGATCAAGGATATCCATGTGCCACCCCGGGTGA	CDS
IP_171619.1	RP	TLN1	ATGAGGAGTCTACTATGCTGGAGGACTCAGTGTCCCCCAAAAAGTCAACAGTCCTGCAGCAGCAATACAACCGGGTGGGGAAAGTGGAGCATGGCTCTGTGGCCCTGCCTGCCATCATGCGCTCTGGAGCCTCTGGTCCTGAGAATTTCCAGGTGGGCAGCATGCCCCCTGCCCAGCAGCAGATTACCAGCGGCCAGATGCACCGAGGACACATGCCTCCTCTGA	CDS
IP_171620.1	RP	TLN1	ATGGCTCCCACCCTGTCTCCTTTGACAAGGCCTGTGAGTTTGCTGGCTTCCAATGCCAGATCCAGTTTGGGCCCCACAATGAGCAGAAGCACAAGGCTGGCTTCCTTGACCTGA	CDS
IP_171625.1	RP	TLN1	ATGCACTGGACGATGGGCAGTGGTCCCAGGGCCTCATTTCTGCTGCCCGGATGGTGGCTGCGGCCACCAACAATCTGTGTGAGGCAGCCAATGCAGCTGTACAAGGCCATGCCAGCCAGGAGAAGCTCATCTCATCAGCCAAGCAGGTAG	CDS
IP_171626.1	MS	TLN1	ATGACTTTGACACTCTGCCGCCTCTTGGCCAGGATGCTGCCTCTAAGGCCTGGCGTAAAAACAAGATGGATGAATCAAAGCATGAGATCCACTCTCAGGTAG	CDS
IP_171768.1	MS and RP	RECK	ATGATATTTCCAAAGTTTGCAGAAAAGAATATGAGAATGCTCTTTTCAGTTGCATTAGCAGAAATGAAATGGGCTCGGTTTGTTGCAGTTATGCAGGTCATCACACAAACTGCCGAGAATACTGTCAAGCCATTTTTCGAACAGACTCTTCTCCTGGTCCATCTCAGATAA	CDS
IP_171802.1	RP	CLTA	ATGCAAGACAGGACGAGCAGCTACAGAAAACAAAAGCAAACAACAGGGTGGCAGATGAAGCTTTCTACAAACAACCCTTCGCTGACGTGA	CDS
IP_171804.1	RP	CLTA	ATGGTGAATACTACCAGGAAAGTAATGGTCCAACAGACAGTTATGCAGCTATTTCACAAGTGGATCGATTGCAGTCAGAGCCTGAAAGTATCCGTAAATGGAGAGAAGAACAAATGGAACGCTTGGAAGCCCTTGATGCCAATTCTCGGAAGCAAGAAGCAGAGTGGAAAGAAAAGGCAATAA	CDS
IP_171854.1	RP	MELK	ATGAAGAGTACTTTATGTTTCCTGAGCCAAAGACTCCAGTTAATAAGAACCAGCATAAGAGAGAAATACTCACTACGCCAAATCGTTACACTACACCCTCAAAAGCTAGAAACCAGTGCCTGA	CDS
IP_172003.1	RP	EXOSC3	ATGTTGGAGGGAGTGAGCCAGCTTCTTTGTCTTACTTGTCATTTGAAGGTGCAACTAAAAGAAACAGACCAAATGTGCAGGTTGGAGATCTCATCTATGGCCAGTTTGTGGTTGCTAATAAAGACATGGAACCAGAGATGGTCTGTATTGACAGCTGTGGACGAGCCAATGGAATGGGTGTCATTGGACAGGATGGTCTGCTTTTTAAAGTGA	CDS
IP_172527.1	MS	TRPM3	ATGGATCGTAATCTCCTATATTTTCACCCTGGGAATAGAAAAGATGAGAGAGATTCTGATGTCAGAGCCAGGGAAGTTGCTACAGAAAGTGAAGGTATGGCTGCAGGAGTACTGGAATGTCACGGACCTCATCGCCATCCTTCTGTTTTCTGTCGGAATGATCCTTCGTCTCCAAGACCAGCCCTTCAGGAGTGA	CDS
IP_172575.1	RP	ABHD17B	ATGGGACTGAAGATGAAGTCATTGACTTTTCACATGGCCTCGCATTGTTTGAACGTTGCCAAAGACCTGTGGAGCCTCTCTGGGTTGAAGGAGCAGGTCACAATGATGTGGAACTTTATGGACAGTATCTTGAAAGGTTGA	CDS
IP_172612.1	MS and RP	ZFAND5	ATGATTACAAAGCAGAAGCTGCAGCAAAAATCAGAAAAGAGAATCCAGTTGTTGTGGCTGAAAAAATTCAGAGAATATAAATTACTTCTTGTGAAGAGACTGAAACTTTGTTTTTATTTTAATATATCGTAG	CDS
IP_172638.1	RP	ANXA1	ATGATATCAAAGCATTCTATCAGAAGATGTATGGTATCTCCCTTTGCCAAGCCATCCTGGATGAAACCAAAGGAGATTATGAGAAAATCCTGGTGGCTCTTTGTGGAGGAAACTAAACATTCCCTTGATGGTCTCAAGCTATGA	CDS
IP_172858.1	MS	CEP78	ATGATGAAGGTGTTTTGGGCAGCATTGAGAATTCTTTTCAGAAGTTTCATGCTTTCTTGGATCTCCTTAAAGATGCTGGGCTTGGGCAGCTTGCCACAATGGCTGGGATAG	CDS
IP_172874.1	RP	PSAT1	ATGCCTCCTACGTGTATTATTGCGCAAATGAGACGGTGCATGGTGTGGAGTTTGACTTTATACCCGATGTCAAGGGAGCAGTACTGGTTTGTGACATGTCCTCAAACTTCCTGTCCAAGCCAGTGGATGTTTCCAAGTTTGGTGTGA	CDS
IP_173026.1	RP	UBQLN1	ATGGAATTCATGATGGACTTACTGTTCACCTTGTCATTAAAACACAAAACAGGCCTCAGGATCATTCAGCTCAGCAAACAAATACAGCTGGAAGCAATGTTACTACATCATCAACTCCTAATAGTAACTCTACATCTGGTTCTGCTACTAGCAACCCTTTTGGTTTAG	CDS
IP_173179.1	RP	NAA35	ATGCACTTCGGTCTTTTGTCAGTCCTCCGGTGCTTTCCCCCAAGTGCTACCTATATAATAATCACCAGGCTAAGGACTGTATCGACTCCTTTGTTACTCACTGTGTTCGGCCATTCTGTAGTCTTATTCAGATCCATGGACATAACAGGGCTCGACAGAGAGATAAGCTTGGTCATATTCTTGAGGAATTTGCCACCTTGCAGGATGAGGCAGAGAAGGTTGATGCAGCGCTTCACACCATGCTGTTGA	CDS
IP_173210.1	RP	ZCCHC6	ATGACAGCCACAAAGATCAGAGTAAGAGATGGCTGTCTGATGAACATACTGGTAATTCAGACAACTGGAGAGAATTCAAACCTGGACCTAGAATTCCTGTTATAA	CDS
IP_173432.1	RP	SEMA4D	ATGAAGATGGCAAAGGAAGATGTCCCTTTGACCCAGCACACAGCTACACATCCGTCATGGTTGATGGAGAACTTTATTCGGGGACGTCGTATAATTTTTTGGGAAGTGAACCCATCATCTCCCGAAATTCTTCCCACAGTCCTCTGA	CDS
IP_173544.1	RP	IARS	ATGAATTGCACGATGAAGACATCCGCCTCATGTACACCTTTGATCAGGCCACAGGTGGGACTGCGCAATTTGAAGCACACTCAGATGCTCAGGCTTTGGTCCTCTTAG	CDS
IP_173548.1	RP	IARS	ATGCTCACCAGAGTGGGTTTCATGTTGACAGAAGATTTGGATGGGATTGCCATGGCTTACCTGTGGAATATGAAATTGATAAGACACTGGGAATCAGAGGACCAGAGGATGTGGCCAAAATGGGGATTACAGAGTATAACAATCAGTGCCGAGCAATTGTGA	CDS
IP_173550.1	RP	IARS	ATGAAGGAATGGCTCGGGAAGTCATCAATCGCATACAGAAACTTCGCAAAAAGTGCAATCTGGTTCCAACTGATGAAATCACAGTGTACTATAAAGCAAAGTCTGAAGGAACATATCTGA	CDS
IP_173752.1	RP	FAM120A	ATGTTTTCCAGCATTCACAGTCTAGAACAGATGACAAAGTTATTCGATTTAAGAGAGCAATTGGATATTATTCAGCGACTAGTAAGCCTATGTCATTTCATCCACCACATTACTTAG	CDS
IP_173987.1	RP	HABP4	ATGAGTGGAAAAATCTTCAAGAACAGACCAGACCAAAGCCTGAGTTTAACATCCGGAAACCAGAATCCACTGTTCCTTCCAAAGCCGTGGTGA	CDS
IP_174073.1	MS	CTSV	ATGCAGGCCATTCGTCCTTCCAGTTCTACAAATCAGGCATTTATTTTGAACCAGACTGCAGCAGCAAAAACCTGGATCATGGTGTTCTGGTGGTTGGCTACGGCTTTGAAGGAGCAAATTCGAATAACAGCAAGTATTGGCTCGTCAAAAACAGCTGGGGTCCAGAATGGGGCTCGAATGGCTATGTAA	CDS
IP_174170.1	RP	C9orf156	ATGCCGAGATGGACCTTGGGCAGCTCAGTTCACAAGATGTTGGTCAGGCGTCATTTAAATATTTTCAGTCAGCAGAGGAAGCAAAGCGTGCCATTGAGGCTGTGCTGTCAGCGGATCCTCGGTCTGTGTACCGCCGGAAGCTTTGCCAGGACCGCCTTTTCTACTTTACTGTAG	CDS
IP_174210.1	RP	NANS	ATGACCAGTACAGGGAGCTGCAGAGGTACGCCGAGGAGGTTGGGATCTTCTTCACTGCCTCTGGCATGGATGAGATGGCAGTTGAATTCCTGCATGAACTGA	CDS
IP_174218.1	RP	CORO2A	ATGGCACCCCCAGTACCGGAGCTCCAAGTTCCGTCATGTCTTTGGCAAACCAGCCAGCAAGGAGAACTGCTACGACTCCGTGCCTATCACCCGCAGCGTTCACGACAACCACTTCTGTGCCGTGAACCCCCACTTCATTGCAGTTGTGACTGA	CDS
IP_174329.1	RP	SEC61B	ATGCCAGCTGTGGGACAAGGAGTGCAGGCCGCACAACCTCGGCAGGCACCGGGGGGATGTGGCGATTCTACACAGAAGATTCACCTGGGCTCAAAGTTGGCCCTGTTCCAGTATTGGTTATGA	CDS
IP_174397.1	RP	MSANTD3	ATGTGCTGGAATGTAAGAAAAGTGATGCGCGAACTATTGCCCTTAAGCAGCGTACCTGGCAGGCGCTGGCCCACGAATACAACTCTCAGCCCAGCGTGTCCCTGCGGGATTTCAAACAGCTGA	CDS
IP_174482.1	MS	GRIN3A	ATGAGCCGGAGCCAGGGACTAGGCGGTCCCCGGCGCCCTCGCCGGGCGCACGCTGGTTGGGGAGCACCCTGCATGGCCGGGGGCCGCCGGGCTCCCGTAAGCCCGGGGAGGGCGCCAGGGCGGAGGCCCTGTGGCCACGGGACGCCCTCCTATTTGCCGTGGACAACCTGA	CDS
IP_174510.1	RP	SMC2	ATGGACTGCATGCCCTTCAAGAAGCAAGTAATAAAGATGCTGAAGCTCTGGCAGCTGCACAGCAGCACTTCAATGCTGTTTCCGCTGGCCTGTCCAGTAATGAAGATGGAGCAGAAGCAACTCTTGCTGGTCAAATGA	CDS
IP_174660.1	RP	TMEM38B	ATGGCTGAAGATGTCATACCCTGCCAAGGTAACCCTGCTGGGGTCAGTTATCTTCACATTCCAGCACACCCAGCATCTGGCAATATCAAAGCATAA	CDS
IP_174995.1	RP	KIAA0368	ATGCTGAAACAGATGAACAATTACAGAATATTATATCTAAATTCCTTCCTCCTGTTTTGCTCAAACTCTCTAGCACCCAAGAAGGAGTACGTAAAAAGGTAA	CDS
IP_175089.1	MS and RP	PTBP3	ATGCACATTATGCCAAAATGGCTCTGGATGGCCAGAATATCTATAATGCATGCTGCACTCTGCGCATTGACTTCTCCAAGCTCACCAGCCTTAATGTGA	CDS
IP_175111.1	RP	HSDL2	ATGCGGAGGGACGGTCCAGCTTTAGCTCTCTGCTCGCCGCCGCCGCTGTCGCCGCCACCTCCTCTGATCTACGAAAGTCATGTTACCCAACACCGGGAGGCTGGCAGGATGTACAGTTTTTATCACAGGTGCAAGCCGTGGCATTGGCAAAGCTATTGCATTGAAAGCAGCAAAGGATGGAGCAAATATTGTTATTGCTGCAAAGACCGCCCAGCCACATCCAAAACTTCTAGGCACAATCTATACTGCTGCTGA	5'UTR
IP_175226.1	RP	CDC26	ATGATCGGATTGGTTATAAACCCCAACCCAAGCCCAATAATCGTTCATCTCAATTTGGAAGTCTTGAATTTTAGAGATGGATTATCTTGCATGCCAGAGCGCTGGAATGGAATAAAATGA	CDS
IP_175232.1	RP	PRPF4	ATGTTTCCACAGATGACTCAGAGGTCAAAGCTTGCCTTAGAGCCTTGGGGGAACCCATCACACTTTTTGGAGAGGGTCCTGCTGAAAGAAGAGAAAGGTTAA	CDS
IP_175235.1	RP	PRPF4	ATGGAAGTTTGGAAGAGAAGGAGAGGGAGCGTCTGGCCAAAGGAGAGTCTGGGATTTTGGGGAAAGACGGACTTAAAGCAGGGATCGAAGCTGGAAATATTAATATAA	CDS
IP_175311.1	RP	RGS3	ATGAGAAGAGGGAGATGGCCTTGGAGGAAGGGAAGGGGCCTGGTGCCGAGGATTCCCCACCCAGCAAGGAGCCCTCTCCTGGCCAGGAGCTTCCTCCAGGACAAGACCTTCCACCCAACAAGGACTCCCCTTCTGGGCAGGAACCCGCTCCCAGCCAAGAACCACTGTCCAGCAAAGACTCAGCTACCTCTGAAGGATCCCCTCCAGGCCCAGATGCTCCGCCCAGCAAGGATGTGCCACCATGCCAGGAACCCCCTCCAGCCCAAGACCTCTCACCCTGCCAGGACCTACCTGCTGGTCAAGAACCCCTGCCTCACCAGGACCCTCTACTCACCAAAGACCTCCCTGCCATCCAGGAATCCCCCACCCGGGACCTTCCACCCTGTCAAGATCTGCCTC…	CDS
IP_175642.1	MS	TRIM32	ATGGGCAGCTGGGTCGCCAGATTAGCCACTTCTTCTCGGAGAATGAGGATTTCCGCTGCATTGCTGGCATGTGTGTGGATGCTCGTGGTGATCTCATCGTGGCTGACAGTAGTCGCAAGGAAATTCTCCATTTTCCTAAGGGTGGGGGCTATAGTGTCCTTATTCGAGAGGGACTTACCTGTCCGGTGGGCATAG	CDS
IP_175777.1	RP	TRAF1	ATGGCACTTTCCTGTGGAAGATCACCAATGTCACCAGGCGGTGCCATGAGTCGGCCTGTGGCAGGACCGTCAGCCTCTTCTCCCCAGCCTTCTACACTGCCAAGTATGGCTACAAGTTGTGCCTGCGGCTGTACCTGA	CDS
IP_175831.1	RP	GSN	ATGACCTCCACTACTGGCTGGGCAATGAGTGCAGCCAGGATGAGAGCGGGGCGGCCGCCATCTTTACCGTGCAGCTGGATGACTACCTGA	CDS
IP_175981.1	RP	RBM18	ATGCATCCATCCTTTCAGAGGGCTCTCTGCAGGAAGGACACCGATTATGGATTGGCAACCTGGACCCCAAAATTACCGAATACCACCTCCTCAAGCTCCTCCAGAAGTTTGGCAAGGTAA	CDS
IP_176005.1	RP	PTGS1	ATGCCACCTTCATCCGAGAGATGCTCATGCGCCTGGTACTCACAGTGCGCTCCAACCTTATCCCCAGTCCCCCCACCTACAACTCAGCACATGACTACATCAGCTGGGAGTCTTTCTCCAACGTGA	CDS
IP_176080.1	RP	PDCL	ATGATAAGTTGCTGGGGGAGAAACTGCAGTACTACTATAGCAGCAGTGAGGATGAGGACAGTGACCACGAGGACAAGGACCGAGGCAGATGTGCCCCAGCCAGCAGTTCTGTGCCTGCAGAGGCTGAGCTGGCAGGCGAAGGCATCTCAGTTAACACAGGCCCAAAAGGTGTGA	CDS
IP_176081.1	RP	PDCL	ATGAGGACCAAGATGATGAAGAGTTTCTGCAGCAGTACCGGAAGCAGCGAATGGAAGAGATGCGGCAGCAGCTTCACAAGGGGCCCCAATTCAAGCAGGTTTTTGAGATCTCCAGTGGAGAAGGGTTTTTAG	CDS
IP_176107.1	RP	RABGAP1	ATGACAAGGCTTCTGTTGGAAAAATCAGTGTCTCTTCAGACTCAGTATCTACTCTTAATAGTGAAGATTTTGTCTTGGTTTCCAGGCAAGGAGATGAGACACCATCTACAAATAATGGAAGTGATGATGAGAAAACAGGACTCAAGATTGTAG	CDS
IP_176137.1	RP	STRBP	ATGAAAAATCAGATAATGAAAGTAAAAATGAAACAGTGTCTTCAAACTCAAGCAATAATACTGGAAATTCTACAACTGAAACCTCCAGTACCTTAG	CDS
IP_176214.1	RP	PSMB7	ATGTTACTGGACCTCACCTCTACAGCATCTATCCTCATGGATCAACTGATAAGTTGCCTTATGTCACCATGGGTTCTGGCTCCTTGGCAGCAATGGCTGTATTTGAAGATAAGTTTAGGCCAGACATGGAGGAGGAGGAAGCCAAGAATCTGGTGA	CDS
IP_176402.1	RP	MAPKAP1	ATGAAATTGTGCTCAAGGTTAACTACATCCTGGAATCGCGAGCTAGCACTGCCCGGGCTGACTACTTTGCTCAAAAACAAAGAAAACTGA	CDS
IP_176414.1	MS	PBX3	ATGGGGATTCTTACCAAGGGTCCCAAGTCGGAGCCAATGTGCAATCACAGGTGGATACCCTCCGTCATGTTATCAATCAGACGGGAGGCTACAGTGATGGCCTTGGAGGAAATTCACTGTACAGTCCACATAATTTAA	CDS
IP_176666.1	RP	SH2D3C	ATGTCCCGAGCCTTGAGTGGCCACTCGCAAGCTGGCCAAGGGCTTCACACAATTTGCCAAGATGACAGAGGGGACCAAGAAGACCAGCAAAAAGTTCAAGTTCTTCAAGTTCAAGGGCTTTGGGAGTCTCTCCAACCTCCCTCGGTCCTTCACTCTGAGACGATCCTCAGCTTCCATCAGTAG	5'UTR
IP_176797.1	RP	DPM2	ATGTCATCCACAAGTATTTCCTGCCCCGAGCCTATGCTGTCGCCATCCCACTGGCTGCAGGCCTCCTGCTGCTCCTGTTTGTGGGACTGTTCATCTCCTATGTGA	CDS
IP_176830.1	RP	SLC25A25	ATGAGTTCACAGTGGAGGAGAGGCAGACGGGGATGTGGTGGAGACACCTGGTGGCAGGAGGTGGGGCAGGGGCCGTATCCAGAACCTGCACGGCCCCCCTGGACAGGCTCAAGGTGCTCATGCAGGTCCATGCCTCCCGCAGCAACAACATGGGCATCGTTGGTGGCTTCACTCAGATGA	CDS
IP_176863.1	RP	C9orf16	ATGACCACCTCCACGCCCGCCTCCAGGAGCTGCTGGAGTCCAACCGGCAGACACGCCTGGAGTTCCAGCAGCAGCTCGGGGAGGCCCCCAGTGATGCCAGCCCCTAGGCTCCAAGAGCCCCCAACCGGGACCCAACCCTGCCTCCCTGGGCTAGGCTCTGGCCTGGGCACTCACCCCCTGGCTTAG	CDS
IP_176920.1	RP	GOLGA2	ATGGCAGTAACCCTGAGACAACCACTTCTGGTGGTTGCCACTCACCTGAGGATACACCCAAGGACAATGCTGCTACTCTACAACCATCTGATGACACCGTGTTACCTGGCGGTGTCCCTTCCCCTGGTGCCAGTCTCACTAGCATGGCGGCATCTCAGAATCATGATGCTGACAATGTCCCTAATCTCATGGATGAAACCAAGACTTTCTCATCAACCGAGAGCCTGCGACAACTCTCCCAACAGCTCAATGGTCTTGTTTGTGAGTCTGCGACATGTGTCAATGGGGAGGGCCCTGCATCGTCTGCTAACCTGA	CDS
IP_176929.1	RP	TRUB2	ATGCCCAGGCTTCTGGAGTACTTGTGCTCGGCGTGGGACATGGATGCAGGCTCCTCACCGATATGTACAATGCTCATCTTACCAAGGATTACACAGTGCGTGGCCTCCTGGGCAAAGCTACAGATGACTTCCGTGAGGACGGGAGGCTGGTAG	CDS
IP_176962.1	RP	URM1	ATGCCGACTGGGAGCTACTGGGTGAGCTGGACTACCAGCTTCAGGACCAGGACAGCGTCCTCTTCATCTCCACTCTGCACGGCGGCTGAGGGCCCTTCTCTGGGCCTGGGCACCCTTAGAGGGGAGAACGAAGCAATCAGACATCCCCTTGGGCCCTGCTTCCAGGTCTCCCTGTCCCCCTTGCCTGCCTTCTTCCCTGCTCTGTCCCCTAAGCTCCCTCCAGGCAGGGAAAAGAGGCCAGGTGCTAAAAATGAGCCTTTCTCAAGCACGTGA	CDS
IP_177045.1	RP	SPTAN1	ATGATTATGGCCGAGACCTGTCTTCTGTGCAGACGCTCCTCACCAAACAGGAAACTTTTGACGCTGGGCTGCAGGCCTTCCAGCAGGAAGGCATTGCCAACATCACTGCCCTCAAAGATCAGCTTCTCGCCGCCAAACACGTTCAGTCCAAGGCCATCGAGGCCCGGCACGCCTCCCTCATGA	CDS
IP_177051.1	RP	SPTAN1	ATGCTGAAGAGCTGGAGAAATGGATACAGGAAAAACTTCAGATTGCATCTGATGAGAATTATAAAGACCCAACCAACTTGCAGGGAAAGCTTCAGAAGCATCAAGCATTTGAAGCTGAAGTGCAGGCCAACTCAGGAGCCATTGTTAAGCTGGATGAAACTGGAAACCTGA	CDS
IP_177053.1	RP	SPTAN1	ATGACCTGCCCATGGTGGAGGAAGGGGAACCTGACCCTGAGTTCGAGGCAATCCTGGACACGGTGGATCCGAACAGAGATGGCCATGTCTCCTTGCAAGAATACATGGCTTTCATGA	CDS
IP_177055.1	RP	SPTAN1	ATGTGGATGAGATTGAGGCTTGGATCAGTGAAAAATTGCAAACAGCGAGTGATGAGTCGTACAAGGATCCCACCAACATCCAGAGCAAGCACCAGAAGCACCAGGCTTTTGAAGCAGAGCTGCATGCCAACGCTGACCGGATCCGTGGGGTTATCGACATGGGCAACTCCCTCATTGAACGTGGAGCCTGTGCCGGCAGTGAGGATGCTGTCAAGGCCCGCCTGGCTGCCTTAG	CDS
IP_177119.1	MS and RP	TBC1D13	ATGTCCGGAGGTTGTGCCCAGACATTTCCTTCTTCCAGAGGGCCACTGACTACCCTTGCCTCCTCATCCTGGACCCCCAGAATGAGTTTGAAACCCTTCGTAAGAGAGTGGAACAGACAACACTGA	CDS
IP_177258.1	RP	PPP2R4	ATGAGACTCCTCCAGTGGACCAGCCCTCTCGGTTTGGGAATAAGGCATACAGGACCTGGTATGCCAAACTTGATGAGGAAGCAGAAAACTTGGTGGCCACAGTGGTCCCTACCCATCTGGCAGCTGCTGTGCCTGAGGTGGCTGTTTACCTAA	CDS
IP_177502.1	RP	FUBP3	ATGAGAAAGTTGGCGGGACCAATCTCGGAGCACCTGGAGCCTTCGGACAGAGTCCATTCAGCCAGCCACCTGCCCCACCTCATCAAAATACCTTTCCTCCAAGGAGCTCCGGGTGCTTCCCAAACATGGCTGCCAAGGTGA	CDS
IP_177547.1	MS	ABL1	ATGGGGAATGGTGTGAAGCCCAAACCAAAAATGGCCAAGGCTGGGTCCCAAGCAACTACATCACGCCAGTCAACAGTCTGGAGAAACACTCCTGGTACCATGGGCCTGTGTCCCGCAATGCCGCTGAGTATCTGCTGA	CDS
IP_177640.1	RP	PRRC2B	ATGGGCAAACAAGCAGGATCAGCAAGACCCAAAGAGTTCCAGTGCGACGGCCTCTCAGCCGCCGGAGTCGCTGCCGCAGCCGGGTTTGCAGAAATCTGTCTCCAATTTGCAGAAACCGACACAGTCAATCAGTCAGGAGAATACAAATTCAGTGCCAGGTGGACCAAAGTCATGGGCACAGCTGAATGGAAAGCCAGTAGGACACGAAGGTGGTTTAAGGGGCTCAAGCCGACTGTTATCCTTCTCTCCCGAGGAATTTCCGACGCTGAAAGCAGCTGGAGGGCAGGACAAGGCTGGCAAAGAAAAGGGCGTCTTAGATCTGTCGTATGGGCCAGGACCAAGCCTCCGCCCTCAGAATGTGACAAGCTGGAGGGAGGGCGGTGGGCGACACATAATTTC…	CDS
IP_177672.1	RP	POMT1	ATGGCAATTTTTTGTGGAACAGAATTGGAGCAGAATACAGTAGCAACGTGCCTGTGTGGTCCCTGCGCCTGCTGCCAGCACTCGCGGGGGCCTTGTCGGTCCCCATGGCCTACCAGATAG	CDS
IP_177708.1	RP	RAPGEF1	ATGATCCCGACTATGAATTCCTCCAGCAAGACCTCTCTAACGCAGACCAGATACCTCAGCAGACGGCCTGGAACCTTAGCCCGTTGCCAGAGTCTTTGGGGGAGTCTGGGTCTCCATTTCTTGGCCCTCCTTTCCAGCTGCCTCTTGGCGGCCATCCCCAGCCAGACGGACCTCTGGCCCCAGGGCAGCAGACAGATACGCCACCTGCTCTCCCCGAGAAGAAGCGCAGGAGCGCAGCCTCCCAGACGGCGGACGGCTCTGGCTGCAGGGTGTCCTACGAGCGGCATCCCTCGCAGTATGACAACATCTCTGGGGAGGACCTGCAGAGCACAGCCCCGATCCCATCCGTCCCCTACGCGCCCTTTGCTGCTATTCTGCCCTTTCAGCATGGAGGTTCCT…	CDS
IP_179053.1	RP	ZMYND19	ATGAGCAGGACATCCCGCTGGTGGAGAGCTACTCCTTTGAGGCCCGAATGGAAGTGGATGCAGATGGAAATGGTGCTAAGATATTTGCCTATGCCTTTGACAAGAACCGAGGAAGGGGCTCTGGGAGACTCCTTCATGAGCTGCTGTGGGAGCGGCACCGGGGGGGCGTGGCCCCGGGCTTCCAGGTGGTGCACCTCAACGCTGTGA	CDS
IP_179081.1	MS and RP	EHMT1	ATGTGCTGGAGACAGACGGCCTCCAGGAAGTGCCTCTCTGCAGCTGCCGGATGGAAACACCGAAGAGTCGAGAGATCACCACACTGGCCAACAACCAGTGCATGGCTACAGAGAGCGTGGACCATGAATTGGGCCGGTGCACAAACAGCGTGGTCAAGTATGAGCTGA	CDS
IP_180430.1	RP	LARP4B	ATGACTCTCTGCCTGAAAATAGCGAGACAGGAGGAAATGAGTCTCAACCAGACAGCCAGGAAGACCCCCGAGAAGTACTTAAAAAAACATTGGAATTCTGCTTATCTAGGGAGAACCTTGCTAGTGACATGTATCTTATATCACAGATGGATAGTGACCAGTATGTGCCAATCACAACGGTGGCTAACCTCGACCACATCAAGAAGCTCAGCACTGATGTGGACTTGA	CDS
IP_180867.1	RP	ATP5C1	ATGAAAAAGCTGATATCAAGGGGCCTGAAGACAAGAAGAAACACCTCCTTATTGGTGTGTCCTCAGATCGAGGACTGTGTGGTGCTATTCATTCCTCCATTGCTAAACAGATGA	CDS
IP_180993.1	RP	CDC123	ATGATGGAACTCTGGTGGTTTCAGGAAGGGATGATCCACCAACACATTCTCAGCCAGACAGTGATGATGAAGCAGAAGAAATACAGTGGTCTGATGATGAGAACACAGCCACGCTTACGGCACCAGAATTTCCTGAGTTTGCCACTAAAGTCCAGGAAGCTATCAATTCCCTCGGGGGCAGTGTCTTTCCTAAGCTTAATTGGAGTGCCCCAAGGGATGCGTATTGGATAG	CDS
IP_181135.1	RP	PRPF18	ATGATGCTTATCTTCAGATGGCCATTGGAAATGCGCCTTGGCCCATCGGTGTCACTATGGTTGGTATCCATGCCAGAACTGGCAGAGAAAAGATTTTTTCCAAGCATGTTGCACATGTTTTAA	CDS
IP_181266.1	RP	NMT2	ATGATGACAATATGTTCCGATTTGACTATTCACCCGAGTTCCTGTTGTGGGCTCTGCGTCCACCAGGCTGGCTCCTGCAGTGGCACTGTGGGGTCAGAGTGTCTTCAAATAAAAAACTGGTCGGGTTCATAA	CDS
IP_181291.1	MS	FAM171A1	ATGAACCAAAATCAGCCCGGAAGGGAAGGGGAGATGCTTTGTCTCTGCAGCAGAACTACCCGCCCGTCCAAGAGCACCAGCAGAAAGAGCCTCGAGCCCCAGACAGCACGGCCTACACGCAGCTCGTGTACCTGGATGACGTGGAACAGAGTGGTAGCGAATGTGGGACCACGGTCTGTACCCCCGAGGACAGTGCCCTGCGATGCTTGTTGGAGGGGTCGAGTCGGAGAAGTGGTGGCCAGCTGCCCAGCCTGCAGGAGGAGACGACCAGACGGACTGCGGATGCCCCCTCGGAGCCAGCAGCCAGCCCCCACCAGAGAAGATCTGCCCACGAGGAAGAGGAAGACGATGATGATGATGACCAAGGAGAAGACAAGAAAAGCCCCTGGCAGAAACGGG…	CDS
IP_181441.1	RP	VIM	ATGTCCAAATCGATGTGGATGTTTCCAAGCCTGACCTCACGGCTGCCCTGCGTGACGTACGTCAGCAATATGAAAGTGTGGCTGCCAAGAACCTGCAGGAGGCAGAAGAATGGTACAAATCCAAGTTTGCTGACCTCTCTGAGGCTGCCAACCGGAACAATGACGCCCTGCGCCAGGCAAAGCAGGAGTCCACTGAGTACCGGAGACAGGTGCAGTCCCTCACCTGTGAAGTGGATGCCCTTAAAGGAACCAATGAGTCCCTGGAACGCCAGATGCGTGAAATGGAAGAGAACTTTGCCGTTGAAGCTGCTAACTACCAAGACACTATTGGCCGCCTGCAGGATGAGATTCAGAATATGA	CDS
IP_181442.1	RP	VIM	ATGGACAGGTTATCAACGAAACTTCTCAGCATCACGATGACCTTGAATAAAAATTGCACACACTCAGTGCAGCAATATATTACCAGCAAGAATAAAAAAGAAATCCATATCTTAAAGAAACAGCTTTCAAGTGCCTTTCTGCAGTTTTTCAGGAGCGCAAGATAG	CDS
IP_181445.1	MS and RP	VIM	ATGTTAAGATGGCCCTTGACATTGAGATTGCCACCTACAGGAAGCTGCTGGAAGGCGAGGAGAGCAGGATTTCTCTGCCTCTTCCAAACTTTTCCTCCCTGA	CDS
IP_181456.1	RP	STAM	ATGCAAAGTTACAGAATCAGCCATATTATATGCAGTCATCTGGTGTTTCTGGTTCTCAGGTGTATGCAGGGCCTCCTCCAAGTGGTGCCTACCTGGTTGCAGGGAACGCGCAGATGA	CDS
IP_181613.1	MS	PLXDC2	ATGGCACAGCACTTGTGGTCCAGTGGGACCATGTACATCTCCAGGATAATTATAACCTGGGAAGCTTCACATTCCAGGCAACCCTGCTCATGGATGGACGAATCATCTTTGGATACAAAGAAATTCCTGTCTTGGTCACACAGATAA	CDS
IP_181914.1	RP	PDSS1	ATGACGTTATTGACGATGCAAGTTCTCGAAGAGGAAAACACACAGTTAATAAGATCTGGGGTGAAAAGAAGGCTGTTCTTGCTGGAGATTTAA	CDS
IP_181981.1	RP	YME1L1	ATGAATCTGGTCATGCCATTATTGCATATTACACAAAAGATGCAATGCCTATCAACAAAGCTACAATCATGCCACGGGGGCCAACACTTGGACATGTGTCCCTGTTACCTGAGAATGACAGATGGAATGAAACTAGAGCCCAGCTGCTTGCACAAATGGATGTTAGTATGGGAGGAAGAGTGGCAGAGGAGCTTATATTTGGAACCGACCATATTACAACAGGTGCTTCCAGTGATTTTGATAATGCCACTAAAATAG	CDS
IP_182098.1	RP	WAC	ATGCGAGGAAACAGCAGAGACTCAGTGATGGCTGTCACGACCGGAGGGGGGACTCGCAGCCTTACCAGGGGGGTGATGTTTTACAGGCACTTAAGTATTCATCGAAGAGTCACCCCAGTAGCGGTGATCACAGACATGAAAAGATGCGAGACGCCGGAGATCCTTCACCACCAAATAAAATGTTGCGGAGATCTGATAGTCCTGAAAACAAATACAGTGACAGCACAGGTCACAGTAAGGCCAAAAATGTGCATACTCACAGAGTTAGAGAGAGGGATGGTGGGACCAGTTACTCTCCACAAGAAAATTCACACAACCACAGTGCTCTTCATAGTTCAAATTCACATTCTTCTAATCCAAGCAATAACCCAAGCAAAACTTCAGATGCACCTTATGATT…	CDS
IP_182324.1	RP	ITGB1	ATGTGCTCAGTCTTACTAATAAAGGAGAAGTATTTAATGAACTTGTTGGAAAACAGCGCATATCTGGAAATTTGGATTCTCCAGAAGGTGGTTTCGATGCCATCATGCAAGTTGCAGTTTGTGGATCACTGA	CDS
IP_182325.1	RP	ITGB1	ATGCCAAATCATGTGGAGAATGTATACAAGCAGGGCCAAATTGTGGGTGGTGCACAAATTCAACATTTTTACAGGAAGGAATGCCTACTTCTGCACGATGTGATGATTTAG	CDS
IP_182326.1	RP	ITGB1	ATGTTACACGGCTGCTGGTGTTTTCCACAGATGCCGGGTTTCACTTTGCTGGAGATGGGAAACTTGGTGGCATTGTTTTACCAAATGATGGACAATGTCACCTGGAAAATAATATGTACACAATGA	CDS
IP_182328.1	RP	ITGB1	ATGGTGTTTGCAAGTGTCGTGTGTGTGAGTGCAACCCCAACTACACTGGCAGTGCATGTGACTGTTCTTTGGATACTAGTACTTGTGAAGCCAGCAACGGACAGATCTGCAATGGCCGGGGCATCTGCGAGTGTGGTGTCTGTAAGTGTACAGATCCGAAGTTTCAAGGGCAAACGTGTGAGATGTGTCAGACCTGCCTTGGTGTCTGTGCTGAGCATAAAGAATGTGTTCAGTGCAGAGCCTTCAATAAAGGAGAAAAGAAAGACACATGCACACAGGAATGTTCCTATTTTAACATTACCAAGGTAG	CDS
IP_182330.1	RP	ITGB1	ATGTTTAAAAGCAAATGCCAAATCATGTGGAGAATGTATACAAGCAGGGCCAAATTGTGGGTGGTGCACAAATTCAACATTTTTACAGGAAGGAATGCCTACTTCTGCACGATGTGA	CDS
IP_182436.1	RP	CREM	ATGAACTGTCCTCTGATGTGCCTGGTGTTCCCAAGATTGAAGAAGAGAGATCAGAGGAAGAAGGAACACCACCTAGTATTGCTACCATGGCAGTACCAACTAGCATATATCAGACTAGCACGGGGCAATACATTGCTATAG	5'UTR
IP_182668.1	RP	RET	ATGCTTACTGGGAGAAGCTGTATGTGGACCAGGCAGCCGGCACGCCCTTGCTGTACGTCCATGCCCTGCGGGACGCCCCTGAGGAGGTGCCCAGCTTCCGCCTGGGCCAGCATCTCTACGGCACGTACCGCACACGGCTGCATGAGAACAACTGGATCTGCATCCAGGAGGACACCGGCCTCCTCTACCTTAACCGGAGCCTGGACCATAGCTCCTGGGAGAAGCTCAGTGTCCGCAACCGCGGCTTTCCCCTGCTCACCGTCTACCTCAAGGTCTTCCTGTCACCCACATCCCTTCGTGAGGGCGAGTGCCAGTGGCCAGGCTGTGCCCGCGTATACTTCTCCTTCTTCAACACCTCCTTTCCAGCCTGCAGCTCCCTCAAGCCCCGGGAGCTCTGCT…	CDS
IP_182720.1	RP	HNRNPF	ATGCACAAAGGAAGAAATTGTTCAGTTCTTCTCAGGGTTGGAAATTGTGCCAAACGGGATCACATTGCCTGTGGACCCCGAAGGCAAGATTACAGGGGAAGCGTTCGTGCAGTTTGCCTCGCAGGAGTTAGCTGA	CDS
IP_182723.1	RP	HNRNPF	ATGATGGGGCCGCAGGTGTCCATTTCATCTACACTAGAGAGGGCAGGCAGAGTGGTGAGGCTTTTGTTGAACTTGGATCAGAAGATGATGTAA	CDS
IP_182724.1	RP	HNRNPF	ATGGCTACGGCTTCACCACCGACCTGTTCGGGAGAGACCTCAGCTACTGTCTCTCCGGAATGTATGACCACAGATACGGCGACAGTGAGTTCACAGTGCAGAGCACCACAGGCCACTGTGTCCACATGA	CDS
IP_182908.1	RP	TIMM23	ATGTTGCATGACAGGGGCTGCGTTTGGTGCAATGAATGGTCTTCGGCTAGGATTGAAGGAAACCCAGAACATGGCCTGGTCCAAACCAAGAAATGTACAGATTTTGAATATGGTGACTAG	CDS
IP_183441.1	RP	CSTF2T	ATGGCTTCTGCGAATACCAAGACCAGGAGACCGCGCTTAGTGCCATGCGGAACCTCAATGGGCGGGAGTTCAGTGGGAGAGCGCTTCGGGTGGACAATGCTGCCAGTGAAAAGAATAAGGAGGAGTTAA	CDS
IP_183537.1	RP	CISD1	ATGCTTTTGACATGGAGGATTTGGGAGATAAAGCTGTGTACTGCCGTTGTTGGAGGTCCAAAAAGTTCCCATTCTGTGATGGGGCTCACACAAAACATAACGAAGAGACTGGAGACAATGTGGGCCCTCTGA	CDS
IP_183876.1	RP	JMJD1C	ATGCCATGCACACTCTTAGGGAAAAATATGGTATTAAATCCCATTGTCATTGTACTAACAAACAGAATTTACAAGTTGGAAATTTTCCTACAATGA	CDS
IP_184119.1	RP	DDX50	ATGGTGGAACATCATATCAAAGCCAAATTAATCATATTCGAAATGGTATTGACATCTTGGTTGGAACACCTGGTCGTATCAAAGACCATCTGCAGAGTGGCCGATTGGATCTTTCTAAACTGCGACATGTTGTGCTTGATGAAGTGGATCAGATGTTAG	CDS
IP_184120.1	RP	DDX50	ATGTTCCTACAACTGAGTCAGAAAGGTTACAGGCAGAGTGGCATGATTCCGACTGGATACTCTCAGTGCCAGCCAAATTACCTGAAATTGAAGAATATTATGATGGAAACACATCTTCTAATTCCAGACAGAGGAGTGGCTGGTCAAGTGGTCGATCAGGCCGGTCAGGCCGGTCAGGTGGTCGATCTGGCGGCCGGTCAGGTAGACAGAGTCGACAAGGAAGTCGCTCAGGAAGTCGACAAGATGGTAGAAGACGAAGTGGGAATAGAAATCGATCAAGAAGTGGGGGCCACAAACGGAGTTTTGACTGAGTATTTGATAGTTAATCTACCAGTGTGA	CDS
IP_184147.1	RP	SUPV3L1	ATGTTTTCTGCACAGCTCCTATCAACAAGAAGCAGCCTTTTGTGTGTTCTTCACTGTTACAGTTTGCCAGGCAGTATAGCAGGAATGAGCCCCTGA	CDS
IP_184246.1	RP	PPA1	ATGGAAAACCAGAAAATGAGTTTGCGTTTAATGCAGAATTTAAAGATAAGGACTTTGCCATTGATATTATTAAAAGCACTCATGACCATTGGAAAGCATTAG	CDS
IP_184247.1	RP	PPA1	ATGCTGCCAGAGCCATTGTGGATGCTTTACCACCACCCTGTGAATCTGCCTGCACAGTACCAACAGACGTGGATAAGTGGTTCCATCACCAGAAAAACTAATGAGATTTCTCTGGAATACAAGCTGATATTGCTACATCGTGTTCATCTGGATGTATTAGAAGTAAAAGTAGTAGCTTTTCAAAGCTTTAAATTTGTAGAACTCATCTAA	CDS
IP_184248.1	RP	PPA1	ATGTTGCGAATTTGTTCCCGTATAAAGGATATATCTGGAACTATGGTGCCATCCCTCAGACTTGGGAAGACCCAGGGCACAATGATAAACATACTGGCTGTTGTGGTGACAATGACCCAATTGATGTGTGTGAAATTGGAAGCAAGGTATGTGCAAGAGGTGAAATAA	CDS
IP_184281.1	RP	EIF4EBP2	ATGACTATTGCACCACGCCCGGGGGGACGCTCTTCTCCACCACACCGGGAGGAACTCGAATCATTTATGACAGAAAGTTTCTGTTGGATCGTCGCAATTCTCCCATGGCTCAGACCCCACCCTGCCACCTGCCCAATATCCCAGGAGTCACTAGCCCTGGCACCTTAA	CDS
IP_184355.1	RP	SGPL1	ATGAGTTTGTCTTCCAGCCAGAGAGTTTATGGTCAAGGTTTAAAAAGAAATGTTTTAAGCTCACCAGGAAGATGCCCATTATTGGTCGTAAGATTCAAGACAAGTTGA	CDS
IP_184425.1	MS	CDH23	ATGTGTCGGCCACTGACCAGGCCCCGCCCTTCAACCAGGGCTTCTGCAGCGTCTACATCACTCTGCTCAACGAGCTGGACGAGGCCGTGCAGTTCTCCAATGCCTCATACGAGGCTGCCATCCTGGAGAATCTGGCACTGGGTACTGAGATTGTGCGGGTCCAGGCCTACTCCATCGACAACCTCAACCAAATCACGTACCGCTTCAACGCCTACACCAGCACCCAGGCCAAAGCCCTCTTCAAGATAG	CDS
IP_184508.1	RP	PSAP	ATGCACCAGGGGCTCGGCAGTGTGGTGCCAGAATGTGAAGACGGCGTCCGACTGCGGGGCAGTGAAGCACTGCCTGCAGACCGTTTGGAACAAGCCAACAGTGAAATCCCTTCCCTGCGACATATGCAAAGACGTTGTCACCGCAGCTGGTGA	CDS
IP_184674.1	RP	P4HA1	ATGATGAAGATCAGGTTGGGGCAGCCAAAGCTCTGTTACGTCTCCAGGATACCTACAATTTGGATACAGATACCATCTCAAAGGGTAATCTTCCAGGAGTGA	CDS
IP_184679.1	RP	P4HA1	ATGGAGTTGGAGGACAGTATGAACCCCATTTTGACTTTGCACGGAAAGATGAGCCAGATGCTTTCAAAGAGCTGGGGACAGGAAATAGAATTGCTACATGGCTGTTTTATATGA	CDS
IP_184718.1	RP	DNAJC9	ATGAGCAGGGAACAGTGGACGAGGACTCTCCTGTGCTCACCCAAGACCGAGACTGGGAGGCGTATTGGCGGCTACTCTTTAAAAAGATATCTTTAG	CDS
IP_184755.1	RP	ANXA7	ATGGAGGTGGTCCAGCACAGGTTCCACTACCTGGTGGCTTTCCTGGAGGACAGATGCCTTCTCAGTATCCTGGAGGACAACCTACTTACCCTAGTCAGCCTGCCACAGTGA	CDS
IP_184842.1	RP	SEC24C	ATGACGATCGGCTCAATGAAGAGAGCGGAGCTCTCCTGCAGTGTGCCCTGCTTTACACCAGCTGTGCAGGGCAGCGTCGGCTCCGCATCCATAATCTGGCCCTGA	CDS
IP_184845.1	RP	SEC24C	ATGGTGGGCAATCAGGGTCCACAGCCCCCGCCATTCCCTATGGAGCCTACAATGGCCCAGTACCAGGCTATCAGCAAACACCTCCCCAAGGTATGTCAAGAGCCCCACCTTCCTCGGGGGCACCTCCAGCCTCAACAGCACAGGCTCCTTGTGGCCAGGCTGCATATGGCCAGTTTGGCCAAGGAGATGTACAGAATGGGCCAAGCTCCACTGTTCAGATGCAAAGGCTGCCTGGGTCTCAGCCATTTGGGTCCCCATTGGCCCCTGTGGGCAACCAGCCACCTGTGCTTCAGCCCTATGGCCCTCCCCCGACAAGTGCACAGGTGGCTACGCAGCTGTCTGGAATGCAGATCAGCGGTGCTGTGGCCCCAGCCCCTCCTTCTTCAGGGCTGGGCTTTG…	CDS
IP_184985.1	RP	VCL	ATGAGCTTGCTCCTCCCAAACCACCTCTGCCTGAAGGTGAGGTCCCTCCACCTAGGCCTCCACCACCAGAGGAAAAGGATGAAGAGTTCCCTGAGCAGAAGGCCGGGGAGGTGA	CDS
IP_184987.1	RP	VCL	ATGGGTCAAGGGGCATCCTCTCTGGAACATCAGACCTGCTCCTTACCTTCGATGAGGCTGAGGTCCGTAAAATTATTAGAGTTTGCAAAGGAATTTTGGAATATCTTACAGTGGCAGAGGTGGTGGAGACTATGGAAGATTTGGTCACTTACACAAAGAATCTTGGGCCAGGAATGA	CDS
IP_185021.1	RP	KAT6B	ATGGTGCTAAAAGCCAAGAAAAAGAGGAACCAGAAATCTCCACGGAAAAAGAAGACTCTGCACGTTTGGATGATCACGAAGAGGAGGAGGAAGAGGATGAAGAGCCATCCCACAACGAGGACCATGATGCCGATGACGAGGATGACAGCCACATGGAGTCTGCCGAAGTGGAGAAGGAAGAGCTGCCCAGAGAAAGCTTCAAAGAAGTACTGGAAAACCAGGAGACTTTTTTAG	CDS
IP_185080.1	RP	VDAC2	ATGGGAAGAGCATTAATGCTGGAGGCCACAAGGTTGGGCTCGCCCTGGAGTTGGAGGCTTAATCCAGCTGAAAGAAACCTTTGGGAATGGATATCAGAAGATTTGGCCTTAATATATTTCCATTGTGACCAGCAGCAGGCTTTTTTCCCCCAAGAAGATGATCAAAACAAAGGATGA	CDS
IP_185092.1	RP	ZNF503	ATGTTCGCAGATCGGGAAGCCCGACCCCTCGCCCTCCTCCAAACTCTCCTCGGTTGCCTCCAACGGGGGCGGCGCGGGCGGTGCCGGCGGCGGTGCTGCGGGCGACAAGGACACCAAATCGGGCCCCCTGAAGCTGAGCGACATCGGCGTGGAGGACAAGTCGAGTTTCAAGCCGTACTCCAAACCCGGCTCGGATAA	CDS
IP_185214.1	RP	POLR3A	ATGAAGCTGCAGATGCCATGTCACGGCTCGCCAGGCTGGCTCCTGTCTACCTGTCTAACCGTGGTTTCTCAATTGGGATCGGTGATGTCACACCTGGCCAAGGACTGCTGA	CDS
IP_185224.1	RP	RPS24	ATGATTCCCTGGATTATGCAAAGAAAAATGAACCCAAACATAGACTTGCAAGACATGGCCTGTATGAGAAGAAAAAGACCTCAAGAAAGCAACGAAAGGAACGCAAGAACAGAATGA	CDS
IP_185267.1	RP	PPIF	ATGTCGTCCCAAAGACAGCTGAGAACTTCAGAGCCCTGTGCACTGGTGAGAAGGGCTTCGGCTACAAAGGCTCCACCTTCCACAGGGTGA	CDS
IP_185465.1	MS	SH2D4B	ATGCTCTGGCCAATGAGAAAGCCCGGATCTTGGCGGAGAAGTGGAAAGTGGAGATGGAAGACCGCAAGGCTGCCAAAGTCCTGGAGGAACGCATCCACGAGGAATTCAAGAGGAAAGAGGAAGAGGAGAGGAAGCGAGGAGAAGAGCAGATTCGCCTCCAGGAAGAGCAGAGGGCGAAGGAGCTCTACTGGACCCTGA	CDS
IP_185588.1	RP	WAPAL	ATGCTCCCACCACTCAGCATGATAAGAGTGGAGAGTGGCAAGAAACAAGTGGAGAAATACAGTGGGTGTCAACTGAAAAGACTGATGGTACAGAAGAGAAACATAAGAAGGAGGAGGAGGATGAAGAACTTGACCTCAATAAAGCCCTTCAGCATGCCGGCAAACACATGGAGGATTGCATTGTGGCCTCCTACACAGCACTACTTCTTGGGTGTCTCTGCCAGGAAAGTCCAATCAATGTAA	CDS
IP_185695.1	RP	GLUD1	ATGGTGGAACTATTCCCATTGTACCCACGGCAGAGTTCCAAGACAGGATATCGGGTGCATCTGAGAAAGACATCGTGCACTCTGGCTTGGCATACACAATGGAGCGTTCTGCCAGGCAAATTATGCGCACAGCCATGA	CDS
IP_185749.1	RP	ATAD1	ATGCTGCCCTCCTCTGTGTTAGAGAATATGTTAATTCTACATCAGAAGAAAGCCATGACGAAGATGAAATTCGGCCTGTTCAACAGCAGGACCTGCATCGGGCAATTGAAAAGATGA	CDS
IP_185864.1	RP	ACTA2	ATGGCTCTGGGCTCTGTAAGGCCGGCTTTGCTGGGGACGATGCTCCCAGGGCTGTTTTCCCATCCATTGTGGGACGTCCCAGACATCAGGGGGTGA	CDS
IP_186089.1	RP	TNKS2	ATGTATATGGAATTGGAGGAGGTACTGGGTGTCCAGTTCACAAAGACAGATCTTGTTACATTTGCCACAGGCAGCTGCTCTTTTGCCGGGTAA	CDS
IP_186148.1	RP	IDE	ATGATAAGTTTTTTTTGCCGAAGGCTTGTCTCAACTTTGAATTTTTCAGCCCATTTGCTTATGTGGACCCCTTGCACTGTAACATGGCCTATTTGTACCTTGAGCTCCTCAAAGACTCACTCAACGAGTATGCATATGCAGCAGAGCTAG	CDS
IP_186149.1	RP	IDE	ATGATGCCTGGAGACTCTTTCAATTGGAAAAAGCTACAGGGAATCCTAAACACCCCTTCAGTAAATTTGGGACAGGTAACAAATATACTCTGGAGACTAGACCAAACCAAGAAGGCATTGATGTAA	CDS
IP_186156.1	RP	KIF11	ATGAACTTGACCAGTGTAAATCTGACCTGCAAAATAAAACACAAGAACTTGAAACCACTCAAAAACATTTGCAAGAAACTAAATTACAACTTGTTAAAGAAGAATATATCACATCAGCTTTGGAAAGTACTGAGGAGAAACTTCATGATGCTGCCAGCAAGCTGCTTAACACAGTTGAAGAAACTACAAAAGATGTATCTGGTCTCCATTCCAAACTGGATCGTAAGAAGGCAGTTGACCAACACAATGCAGAAGCTCAGGATATTTTTGGCAAAAACCTGA	CDS
IP_186157.1	RP	KIF11	ATGTTTACCGAAGTGTTGTTTGTCCAATTCTGGATGAAGTTATTATGGGCTATAATTGCACTATCTTTGCGTATGGCCAAACTGGCACTGGAAAAACTTTTACAATGGAAGGTGAAAGGTCACCTAATGAAGAGTATACCTGGGAAGAGGATCCCTTGGCTGGTATAA	CDS
IP_186248.1	RP	FRA10AC1	ATGGTCATGGAGGCTATGATTCTGATTTTAGTGATGATGAACGCTGTGGAGAATCCAGCAAAAGGAAAAAAAGGACAGTTGAAGATGACTTACTGCTCCAAAAACCATTTCAGAAAGAAAAACATGGAAAGGTGGCCCATAAACAAGTTGCAGCAGAATTGCTGGATAGGGAAGAAGCAAGAAATAGAAGGTTTCATCTCATAG	CDS
IP_186369.1	RP	PDLIM1	ATGAGCCCCCGAAACAGTCCACGTCTTTCTTGGTTTTGCAGGAAATCCTGGAGTCTGAAGAAAAAGGGGATCCCAACAAGCCCTCAGGATTCAGAAGTGTTAAAGCTCCTGTCACTAAAGTGGCTGCGTCGATTGGAAATGCTCAGAAGTTGCCTATGTGTGACAAATGTGGCACTGGGATTGTTGGTGTGTTTGTGA	CDS
IP_186492.1	RP	ENTPD1	ATGAAACCAATAATCAGGAAACCTTTGGAGCTTTGGACCTTGGGGGAGCCTCTACACAAGTCACTTTTGTACCCCAAAACCAGACTATCGAGTCCCCAGATAATGCTCTGCAATTTCGCCTCTATGGCAAGGACTACAATGTCTACACACATAGCTTCTTGTGCTATGGGAAGGATCAGGCACTCTGGCAGAAACTGGCCAAGGACATTCAGGTTGCAAGTAATGAAATTCTCAGGGACCCATGCTTTCATCCTGGATATAAGAAGGTAG	CDS
IP_186496.1	RP	ENTPD1	ATGGGATTGTGCTGGATGCGGGTTCTTCTCACACAAGTTTATACATCTATAAGTGGCCAGCAGAAAAGGAGAATGACACAGGCGTGGTGCATCAAGTAG	CDS
IP_186550.1	MS	ZNF518A	ATGGTAATTTTCAATGTGAAAAGTGTAAGTTCTCCACCCAGGATGTTGGCACATTTGTTCAGCACATTCATAGACATAATGAAATTCATTATAAGTGTGGTAAATGTCATCATGTATGTTTTACCAAAGGAGAGCTTCAGAAGCACCTTCATATTCATTCTGGTACTTTTCCCTTCACTTGTCAATATTGTAGCTATGGTGCCACCAGGAGAGAACACCTTGTAA	CDS
IP_186564.1	RP	BLNK	ATGCTTCAAGTGTTTGTGAAGAAAAACCTATACCTGCTGAACGCCACCGAGGGTCAAGTCACAGACAAGAAGCTGTGCAGTCACCAGTGTTTCCTCCTGCCCAGAAACAAATCCACCAAAAACCCATACCTCTGCCAAGATTTACAGAAGGGGGAAACCCAACTGTGGATGGGCCCCTACCCAGCTTTTCATCTAATTCCACTATTTCAGAACAGGAAGCTGGCGTTCTCTGCAAGCCATGGTATGCTGGAGCCTGTGATCGAAAGTCTGCTGAAGAGGCATTGCACAGATCAAACAAGGATGGATCATTTCTTATTCGGAAAAGCTCTGGCCATGATTCCAAACAACCATATACACTAG	CDS
IP_186763.1	RP	PGAM1	ATGATGTCCCACCACCTCCGATGGAGCCCGACCATCCTTTCTACAGCAACATCAGTAAGGATCGCAGGTATGCAGACCTCACAGAAGATCAGCTACCCTCCTGTGAGAGTCTGA	CDS
IP_186848.1	RP	PI4K2A	ATGCAGACTATTGGCTGCGGCGTTTTGAAGCAGAACCTCTTCCTGAGAACACTAACCGGCAACTACTGCTCCAGTTTGAGCGGTTGGTGGTGCTGGATTACATCATCCGCAACACTGATCGAGGCAATGACAACTGGCTGA	CDS
IP_187167.1	MS	CHUK	ATGCCAAAGATGTTGATCAAGGAAGTCTGTGTACATCTTTTGTGGGAACACTGCAGTATCTGGCCCCAGAGCTCTTTGAGAATAAGCCTTACACAGCCACTGTTGATTATTGGAGCTTTGGGACCATGGTATTTGAATGTATTGCTGGATATAGGCCTTTTTTGCATCATCTGCAGCCATTTACCTGGCATGAGAAGATTAAGAAGAAGGATCCAAAGTGTATATTTGCATGTGAAGAGATGTCAGGAGAAGTTCGGTTTAGTAGCCATTTACCTCAACCAAATAGCCTTTGTAGTTTAG	CDS
IP_187283.1	RP	FAM178A	ATGAAGAGAGAAGGGGGTGCCGCCCACCTCTGCTCCGACAGCCTCCCGGAGTCCCAGCAGCAAGACGGCAACCACGCACCCAACTTCTCCAGCCACGGCTCATGCCGCCGTCGCCAGCGGCGCCGACATGACAAGGCGCTGCATGCCCGCTAG	5'UTR
IP_187494.1	MS	C10orf76	ATGGCGACACATTTCTGCCAACCCCCAGCAGCTATGATGAACTTTACTATGAGATTATCCGCATGCACCAGAGCTTTGACAACCTCTACTCCATGGTCCTGA	CDS
IP_187521.1	RP	PPRC1	ATGCAGATTCTGAGAACCTTTCTCCATTTGACAGCATTCCTGATTCGGAGCTGCTTGTGTCACCCCGGGAGGGCTCCTCTCTGCACAAGCTGCTTACTCTCTCTCGGACACCCCCAGAACGTGACCTCATCACCCCAGTTGACCCACTGGGGCCCAGTACAGGCAGCAGTAGAGGGAGTGGGGTTGAAATGTCTCTTCCAGATCCCTCTTGGGACTTCTCCCCACCCTCTTTCTTAG	CDS
IP_187565.1	MS	GBF1	ATGATTGTGACTACTACTGTTCCAACCTCTTTGAGGAACTCACAAAGCTGCTGTCCAAGAATGCCTTCCCTGTGTCTGGTCAACTCTATACAACACACCTACTATCTCTTGATGCCCTATTGA	CDS
IP_187569.1	MS	GBF1	ATGGCGGATGCAAGTCCCAGGAGAAACGTGGCAAGAGTCACAAATATGACAGCAAAGGGAACCGCTTCAAGAAGAAATCCAAAGAGGGATCAATGCTTCGCCGGCCTCGAACCTCCAGCCAACATGCCTCTCGGGGCGGGCAGAGTGATGATGATGAGGACGAAGGCGTGCCTGCCAGCTACCATACGGTGTCTTTACAGGTCAGTCAGGACTTGCTAG	CDS
IP_187572.1	RP	GBF1	ATGGGAAATCAGGATGCAGTGATCTGGAGGAAGCTGTTGACTCTGGGGCTGACAAAAAGTTTGCCCGGAAGCCACCCCGATTTTCCTGTCTCCTGCCAGATCCACGGGAACTAA	CDS
IP_187643.1	RP	ACTR1A	ATGAGGAAGACGGTGCCCGATCCATCCACAGAAAAACCTTCTAATGTCGGGACATCATCTTCACCTCTCTCTGAAGTTAACTCCACTTTAAAACTCGCTTTCTTGAGTCGGAGTGTTTGCGAGGAACTGCCTGTGTGTGAGTGCGTGTGTGGATATGAGTGTGTGTGCACATGCGAGTGCCGTGTGGCCCTGGGACCCTGGGCCCAGAAAGGACGATGA	CDS
IP_187783.1	MS	TAF5	ATGACGAGGATGAAGAGGGAGAAAATGAAGAAGGAAAACCTAAAAAGAAGAAGCCTAAAAAAGATAGTATTGGATCCAAAAGCAAAAAACAAGATCCCAATGCTCCACCTCAGAACAGAATCCCTCTTCCTGAGTTGA	CDS
IP_187931.1	RP	SLK	ATGAGAGAATGGCTCAGCATCAGAAACATGAGAATCAAATGCGAGATCTTCAGTTGCAGTGTGAAGCCAATGTCCGCGAACTGCATCAGCTGCAGAATGAAAAATGCCACTTGTTGGTTGAGCATGAGACTCAGAAACTGA	CDS
IP_188118.1	RP	SMC3	ATGACAAGAAAAGACAGATTGCTGCTATACATAAGGATTTGGAAGACACTGAAGCAAATAAAGAGAAAAATCTGGAGCAGTATAATAAACTGGACCAGGATCTTAATGAAGTCAAAGCTCGAGTAG	CDS
IP_188119.1	RP	SMC3	ATGGATCTGGAAAAAGTAACTTTTTTTATGCAATTCAGTTTGTTCTCAGTGATGAGTTTAGTCATCTTCGTCCAGAACAGCGGTTGGCTTTATTGCATGAAGGTACTGGTCCTCGTGTTATTTCTGCTTTTGTGGAGATTATTTTTGATAATTCAGACAACCGGTTACCAATCGATAAAGAGGAAGTTTCACTTCGAAGAGTTATTGGTGCCAAAAAGGATCAGTATTTCTTAG	CDS
IP_188121.1	RP	SMC3	ATGAACTACAAAGTGAAAGAAACTACTTGTGGAGAGAAGAGAATGCAGAACAGCAAGCACTTGCTGCTAAAAGAGAAGATCTTGAAAAGAAGCAACAACTTCTTAGAGCAGCAACAGGAAAGGCCATTTTAA	CDS
IP_188122.1	RP	SMC3	ATGTGGAGGGCAGTCAGTCTCAAGATGAAGGAGAAGGGAGTGGTGAGAGTGAGAGGGGTTCTGGCTCACAAAGCAGTGTCCCATCAGTTGACCAGTTTACTGGAGTTGGAATTAGGGTGTCATTTACAGGAAAACAAGGTGAAATGA	CDS
IP_188160.1	RP	SHOC2	ATGCCGGGAAGAGAATTCAATGCGTTTGGACTTATCCAAGAGATCTATACACATATTGCCATCATCAATCAAAGAGTTGACTCAATTAACAGAACTTTATTTATACAGTAA	CDS
IP_188198.1	RP	ACSL5	ATGCCAAGACTATGTATGAGGTTTTCCAAAGAGGACTCGCTGTGTCTGACAATGGGCCCTGCTTGGGATATAGAAAACCAAACCAGCCCTACAGATGGCTATCTTACAAACAGGTGTCTGATAGAGCAGAGTACCTGGGTTCCTGTCTCTTGCATAAAGGTTATAAATCATCACCAGACCAGTTTGTCGGCATCTTTGCTCAGAATAGGCCAGAGTGGATCATCTCCGAATTGGCTTGTTACACGTACTCTATGGTAG	CDS
IP_188200.1	MS and RP	ACSL5	ATGAAGCTTATGGTCAAACAGAATGCACAGGTGGCTGTACATTTACATTACCTGGGGACTGGACATCAGGTCACGTTGGGGTGCCCCTGGCTTGCAATTACGTGA	CDS
IP_188202.1	RP	ACSL5	ATGCACAGGTGGCTGTACATTTACATTACCTGGGGACTGGACATCAGGTCACGTTGGGGTGCCCCTGGCTTGCAATTACGTGAAGCTGGAAGATGTGGCTGA	CDS
IP_188229.1	MS	VTI1A	ATGAAAAGAAACAGATGGTTGCAAATGTGGAGAAACAGCTTGAAGAAGCGAAAGAACTGCTTGAACAGATGGATTTGGAAGTCCGAGAGATACCACCCCAAAGTCGAGGGATGTACAGCAACAGAATGA	CDS
IP_188563.1	RP	TRUB1	ATGGACCAAGAGGAAAAAGCAGACTTTGAAAATTGGGCATGGAGGGACTCTAGACAGCGCAGCCCGAGGAGTTCTGGTTGTTGGAATTGGAAGCGGAACAAAAATGTTGACCAGTATGTTGTCAGGGTCCAAGAGATATACTGCCATTGGAGAACTGGGGAAAGCTACTGA	CDS
IP_188651.1	MS	PNLIPRP2	ATGGGTACATCAGGATTGCTTTGTATGGAAGTAATGAAAACTCAAAACAATATGAGATTTTCAAAGGATCCCTCAAACCAGATGCAAGTCACACGTGTGCTATTGATGTGGATTTTAATGTTGGAAAAATACAGAAAGTTAAATTCCTCTGGAACAAACGTGGGATAA	CDS
IP_188711.1	RP	VAX1	ATGCCAAGGGGTCCATCCGAGAGATCATCCTGCCCAAGGGCCTGGACTTGGACCGGCCTAAGAGGACGCGCACGTCCTTCACCGCGGAGCAGCTCTATCGGCTGGAGATGGAGTTCCAGCGCTGCCAGTACGTGGTGGGCCGCGAGAGGACCGAGCTCGCCCGGCAGCTTAACCTCTCCGAGACCCAGGCAAATAGTGAAGAAAATAATGAACGATTCAAACGCGGGATAA	CDS
IP_188819.1	RP	EIF3A	ATGAGGACAGGTCTCATAGAAGAGATGAAGAGCGGCCCCGGCGTCTGGGGGATGATGAAGATAGAGAGCCCTCTCTTAGACCAGACGATGATCGGGTTCCCCGGCGTGGCATGGATGATGACAGAGGCCCTAGACGTGGTCCTGAGGAAGATAGGTTCTCTCGTCGTGGGGCAGACGATGACCGGCCTTCCTGGCGTAACACAGATGATGACAGGCCTCCCAGACGAATTGCCGATGAAGACAGGGGAAACTGGCGTCATGCGGATGATGACAGACCACCTAGACGAGGACTGGATGAGGACAGAGGAAGCTGGCGAACAGCTGATGAGGACAGAGGACCAAGACGTGGGATGGATGATGACCGGGGGCCGAGGCGAGGAGGCGCTGATGATGAGCGAT…	CDS
IP_188858.1	RP	RGS10	ATGGCAGTTCCAGCAGCAGCCACCAGAGCCTCAAGAGCACAGCCAAATGGGCGGCATCCCTGGAGAATCTGCTGGAAGACCCAGAAGGCGTGA	CDS
IP_188862.1	RP	TIAL1	ATGGAAACCCACAACAGTATGGACAGTATATGGCAAATGGGTGGCAAGTACCGCCTTATGGAGTATACGGGCAACCATGGAATCAACAAGGATTTGGAGTAG	CDS
IP_188864.1	RP	TIAL1	ATGGTTTTGTATCTTTTTATAACAAACTGGATGCAGAAAATGCGATTGTGCATATGGGCGGTCAGTGGTTGGGTGGTCGTCAAATCCGAACCAATTGGGCCACTCGTAAACCACCTGCACCTAAAAGTACACAAGAAAACAACACTAAGCAGTTGA	CDS
IP_188942.1	RP	WDR11	ATGCCAAGCCTATCCAGGATGTTCAGTGGTTGTGGAATCAAGATGCTTCCCGCGATTTACTGCTTGCTATCCACCCGCCAAATTACATTGTGCTCTGGAATGCCGACACTGGCACCAAACTATGGAAGAAGAGCTATGCAGATAACATTCTTTCTTTTTCTTTTGACCCTTTTGATCCCTCACATTTAA	CDS
IP_189007.1	RP	ATE1	ATGGCGAAGAAGTGGAAAATATGTGTACAAACCTGTCATGAATCAAACATGTTGTCCTCAGTACACAATAAGGTGCCGACCTTTACAATTTCAGCCTTCAAAATCTCACAAGAAGGTTTTGAAAAAAATGTTGAAATTTCTAGCTAA	CDS
IP_189394.1	RP	ZRANB1	ATGCACTTTGGAACCGGACTGCAGGAGACTGCCTACTTGATTCAGTTCTACAAGCTACCTGGGGCATCTATGACAAGGACTCAGTGCTTCGGAAAGCCCTGCATGACAGCCTGCATGACTGTTCACATTGGTTTTACACACGCTGGAAAGATTGGGAATCATGGTATTCTCAGAGCTTTGGTTTACATTTTTCCTTGA	CDS
IP_189427.1	MS	EDRF1	ATGGTGATGGAGCCGCTCAGCCTGTCTCATCCACCGCAGAACAGCAGGAATCGTCCAGTTCAGATCAGACAAATGATTCGGAAGGGGCTTCATGGCCTGCTCCCTTCGAAATGCCTTCTTCAGTTTCTGAAGATCCCAGTGCTTCCAGTCAGGGAAGTGAGCCTCTTGAACCCTCATACATAG	CDS
IP_189666.1	MS and RP	BNIP3	ATGGGAACGGGGGCAGCGTTCCAGCCTCGGTTTCTATTTATAATGGAGACATGGAAAAAATACTGCTGGACGCACAGCATGAGTCTGGACGGAGTAGCTCCAAGAGCTCTCACTGTGACAGCCCACCTCGCTCGCAGACACCACAAGATACCAACAGAGCTTCTGAAACAGATACCCATAGCATTGGAGAGAAAAACAGCTCACAGTCTGAGGAAGATGATATTGAAAGAAGGAAAGAAGTTGAAAGCATCTTGA	CDS
IP_189740.1	MS	PWWP2B	ATGACTTCAAGAGCTGTCCCCAGGGTCCACAGGGACGCGAGGGCTTGGCTTTTCTCGTCAGCTGCCCTGAGGGGAGAGCGGACTGTGCCAGTGAGTCGGCGTGCAGCAGCGACAGCCTGGACGAGGCCAGATCGTCCGGCTCGGAAGGGACGCCGGCAGACACGGGTGACCTCTCGCCTGGCCACGGCGCGTCAGCGCCCTCGGTGTCCAGAGAGGCTCGCCAAACGGTGCCGCCCCTGA	CDS
IP_189833.1	RP	TUBGCP2	ATGACGTCAATGAACTGCTTAGCCTGCTGCGTGTCCACGGAGGAGATGGGGCTGAGGTCTACATTGACCTGCTTCAAAAGAACAGGACCCCGTACGTCACTACCACTGTCTCTGCTCACAGTGCCAAGGTTAAAATTGCAGAGTTTTCTCGTACTCCAGAAGACTTTCTAA	CDS
IP_191271.1	RP	RIC8A	ATGATGCCCAACAGGAGGACCGGAAGAGACTGGCGGAGCTGCTGGTCTCCGTCCTGGAACAGGGCTTGCCACCCTCCCACCGTGTCATCTGGCTGCAGAGTGTCCGAATCCTGTCCCGGGACCGCAACTGCCTGGACCCGTTCACCAGCCGCCAGAGCCTGCAGGCACTAG	CDS
IP_191520.1	MS	PIDD	ATGATCTGGATGAGCAGATCCGTCACATGCTCTTCTCCTGGGCTGAGCGCCAGGCTGGGCAGCCAGGGGCTGTGGGGCTCCTGGTGCAGGCCCTGGAGCAGAGTGACCGGCAGGACGTGGCTGAAGAGGTGCGCGCAGTCTTGGAGCTCGGCCGCCGCAAGTACCAGGACAGCATCCGACGCATGGGCTTGGCCCCCAAGGACCCCGCTCTGCCTGGCTCCTCGGCTCCACAGCCCCCAGAGCCTGCCCAGGCCTAGGCCCCACAGACTTTTAGGCTGGCCCAGATATTCCCCAGTGGATGGGCAGAGCCCCCACCTTCAAGTCTCTCCAGTGTGTGGGGACGGGTCCCTGTGA	CDS
IP_191985.1	RP	NAP1L4	ATGAAGAGGTACATGACTTGGAAAGAAAGTATGCAGCGCTATACCAGCCTCTCTTTGACAAGAGAAGAGAATTTATCACCGGCGATGTTGAACCAACAGATGCGGAATCGGAATGGCACAGTGAAAATGAAGAGGAAGAGAAATTGGCTGGAGACATGA	CDS
IP_192071.1	RP	NUP98	ATGAGAATCACCAGCAGGATGGAGATGAAGATTCCCTTGTTTCACATTTTTATACTAACCCTATTGCCAAACCTATTCCTCAAACCCCAGAAAGTGCTGGAAATAAACACAGCAACAGCAACAGTGTGGATGATACCATTGTTGCATTAA	CDS
IP_192075.1	RP	NUP98	ATGGTCAGAACAAAACTGCCTTTGGAACTAGTACAACTGGATTTGGAACAAATCCAGGTGGTCTCTTTGGCCAACAGAATCAGCAGACTACCAGCCTCTTCAGCAAACCATTTGGCCAGGCTACAACCACCCAGAACACTGGCTTTTCCTTTGGTAATACCAGCACCATAG	CDS
IP_192141.1	RP	STIM1	ATGTATGCGTCCGTCTTGCCCTGTGGCTCCTCTGGGGACTCCTCCTGCACCAGGGCCAGAGCCTCAGCCATAGTCACAGTGAGAAGGCGACAGGAACCAGCTCGGGGGCCAACTCTGAGGAGTCCACTGCAGCAGAGTTTTGCCGAATTGACAAGCCCCTGTGTCACAGTGAGGATGAGAAACTCAGCTTCGAGGCAGTCCGTAACATCCACAAACTGA	CDS
IP_192154.1	RP	RRM1	ATGCCATCATTGAGTCTCAGACGGAAACAGGCACCCCGTATATGCTCTACAAAGATTCCTGTAATCGAAAGAGCAACCAGCAGAACCTGGGAACCATCAAATGCAGCAACCTGTGCACAGAAATAG	CDS
IP_192155.1	RP	RRM1	ATGAGTGTCCTGGTCTGGATGAGGTTTGGGGAGAGGAATTTGAGAAACTATATGCAAGTTATGAGAAACAAGGTCGTGTCCGCAAAGTTGTAA	CDS
IP_192156.1	RP	RRM1	ATGGTGCTCTGGAAGCCAGCTGTGACCTTGCCAAGGAGCAGGGCCCATACGAAACCTATGAGGGCTCTCCAGTTAGCAAAGGAATTCTTCAGTATGATATGTGGAATGTTACTCCTACAGACCTATGGGACTGGAAGGTTCTCAAGGAGAAGATTGCAAAGTATGGTATAA	CDS
IP_192158.1	RP	RRM1	ATGGCCGCCAAGAACGAGTCATGTTTGACAAAATTACATCTCGAATCCAGAAGCTTTGTTATGGACTCAATATGGATTTTGTTGATCCTGCTCAGATCACCATGA	CDS
IP_192592.1	RP	ILK	ATGACACCCCCCTGCATCTGGCAGCCAGTCATGGACACCGTGATATTGTACAGAAGCTATTGCAGTACAAGGCAGACATCAATGCAGTGA	CDS
IP_192774.1	RP	EIF3F	ATGAGTCAGAAGATGAAGTGGCTGTTGACATGGAATTTGCTAAGAATATGTATGAACTGCATAAAAAAGTTTCTCCAAATGAGCTCATCCTGGGCTGGTACGCTACGGGCCATGACATCACAGAGCACTCTGTGCTGA	CDS
IP_193012.1	RP	IPO7	ATGCCTGCCATGCAGAACATGAGAATGACAGTGATGATGATGATGAAGCTGAAGATGATGATGAAACCGAGGAACTGGGGAGTGATGAAGATGATATTGATGAAGATGGGCAAGAATATTTGGAGATTCTGGCTAAGCAGGCTGGTGAAGATGGAGATGATGAAGATTGGGAAGAAGATGATGCTGAAGAGACTGCTCTGGAAGGCTATTCCACAATCATTGATGATGAAGATAACCCTGTTGATGAGTATCAGATATTTAAAGCTATCTTTCAAACTATTCAAAATCGTAATCCTGTGTGGTATCAGGCACTGA	CDS
IP_193102.1	RP	AMPD3	ATGATATTCGAAAGACAAATGTGGCTCAGATCCGGATGGCATTCCGATATGAGACCTTATGCAATGAGCTCAGCTTCCTGTCTGATGCTATGA	CDS
IP_193118.1	RP	RNF141	ATGAATCTTGGGTGGTATCAGATGCACCCACTGAAGATGATATGGCTAACTATATTCTTAACATGGCTGATGAGGCAGGCCAGCCCCACAGGCCATGACCTTGAAGTGAAAGTCTTCTGTTGCTATTGTGGGCTCAAATATTTGGTCATGGGGGAAGAATGTAGGGTTGTGGCACTGGCACAGACACAGGAAAATCCATTTTCCCCACTCTTTTATTTTTGCTATTCTGATCATTTGTCCCCCTTTTAA	CDS
IP_193157.1	RP	CTR9	ATGTTCAGGAAGATTATGACCAAGCTTTTCAGTACTATTATCAAGCCACACAGTTTGCCTCATCCTCTTTTGTGCTCCCATTTTTTGGTTTGGGACAAATGTATATTTATCGAGGTGACAAAGAAAATGCATCTCAGTGCTTTGAGAAGGTTTTGA	CDS
IP_193164.1	RP	CTR9	ATGTACAACAGGCTCGGAAAGAAAAGAATAAGGACAATAAAAAGGATCTTATTACACAGGCCACCTTGTTGTATACAATGGCCGATAAAATTATTATGTATGATCAGAACCATTTGTTGGGAAGAGCCTGCTTCTGCCTACTTGAGGGTGACAAAATGGATCAAGCTGATGCACAGTTTCATTTTGTACTCAATCAGTCTCCAAATAATATTCCAGCCCTTCTTGGTAAAGCTTGCATTTCCTTCAACAAGAAGGATTACAGAGGAGCTCTTGCTTACTATAAGAAAGCATTGCGTACTAACCCAGGATGTCCAGCGGAAGTTCGTTTAG	CDS
IP_193170.1	RP	EIF4G2	ATGATCACGTTGATCTACAAGTCAGTGCCCTGTATGCTCTCCAGGTGCACTGCTATAACAGCAACTTCCCAAAAGGCATGTTACTTCGCTTTTTTGTGCACTTCTATGACATGGAAATTATTGAAGAAGAAGCTTTCTTGGCTTGGAAAGAAGATATAA	CDS
IP_193171.1	RP	EIF4G2	ATGAATTTGAAAACCGAACTAGAAATGTTGATGTCTATGATAAGCGTGAAAATCCCCTCCTCCCCGAGGAGGAGGAACAGAGAGCCATTGCTAAGATCAAGATGTTGGGAAACATCAAATTCATTGGAGAGCTTGGCAAGCTTGATCTTATTCACGAATCTATCCTTCATAAGTGCATCAAAACACTTTTGGAAAAGAAGAAGAGAGTCCAACTCAAAGATATGGGAGAGGATTTGGAGTGCCTCTGTCAGATAA	CDS
IP_193172.1	RP	EIF4G2	ATGCTCAGCTATGTCTGCGATTGGCAGAAGATGCACCAAACTTTGATGGCCCAGCAGCAGAGGGTCAACCAGGACAGAAGCAAAGCACCACATTCAGACGCCTCCTAA	CDS
IP_193211.1	RP	USP47	ATGTTACAAGGAGCTTTGGATGGGATAGTAGTGAGGCTTGGCAGCAGCATGATGTACAAGAACTATGCAGAGTCATGTTTGATGCTTTGGAACAGAAATGGAAGCAAACAGAACAGGCTGATCTTATAA	CDS
IP_193214.1	MS and RP	USP47	ATGACAGGAGTACAAGTTCAGTGGACAGTGATATTCTTAGCTCCAGTCATAGCAGTGATACTTTGTGCAATGCAGACAATGCTCAGATCCCTTTGGCTAATGGACTTGACTCTCACAGTATCACAAGTAGTAGAAGAACGAAAGCAAATGAAGGGAAAAAAGAAACATGGGATACAGCAGAAGAAGACTCTGGAACTGATAGTGAATATGATGAGAGTGGCAAGAGTAGGGGAGAAATGCAGTACATGTATTTCAAAGCTGAACCTTATGCTGCAGATGAAGGTTCTGGGGAAGGACATAAATGGTTGA	CDS
IP_193216.1	RP	USP47	ATGGAGATAATGGGGACAGCAGCAAAAGTACTGAGACAAGTGACTTTGAAAACATCGAATCACCTCTCAATGAGAGGGACTCTTCAGCATCAGTGGATAATAGAGAACTTGAACAGCATATTCAGACTTCTGATCCAGAAAATTTTCAGTCTGAAGAACGATCAGACTCAGATGTGA	CDS
IP_193375.1	RP	BTBD10	ATGATGATGTGGTTGATTGGGATGAAGAATATCCACCACAGATGGGAGAAGAATATTCACAAATTATTTATAGCACAAAATTATATAGATTTTTCAAGTATATTGAAAACAGAGATGTGGCCAAGTCAGTTTTGA	CDS
IP_193426.1	RP	PSMA1	ATGTTGACAACCATATTGGTATCTCAATTGCGGGGCTTACTGCTGATGCTAGACTGTTATGTAATTTTATGCGTCAGGAGTGTTTGGATTCCAGATTTGTATTCGATAGACCACTGCCTGTGTCTCGTCTTGTATCTCTAA	CDS
IP_193427.1	RP	PSMA1	ATGGCCGGAGACCATATGGTGTTGGTCTCCTTATTGCTGGTTATGATGATATGGGCCCTCACATTTTCCAAACCTGTCCATCTGCTAACTATTTTGACTGCAGAGCCATGTCCATTGGAGCCCGTTCCCAATCAGCTCGTACTTACTTGGAGAGACATATGTCTGAATTTATGGAGTGTAATTTAA	CDS
IP_193428.1	RP	PSMA1	ATGTTTCCATTGGAATTGTTGGTAAAGACTTGGAGTTTACAATCTATGATGATGATGATGTGTCTCCATTCCTGGAAGGTCTTGAAGAAAGACCACAGAGAAAGGCACAGCCTGCTCAACCTGCTGATGAACCTGCAGAAAAGGCTGATGAACCAATGGAACATTAAGTGA	CDS
IP_193429.1	MS and RP	PSMA1	ATGACAATGATGTCACTGTTTGGAGCCCCCAGGGCAGGATTCATCAAATTGAATATGCAATGGAAGCTGTTAAACAAGGTTCAGCCACAGTTGGTCTGA	CDS
IP_193529.1	RP	C11orf58	ATGATGGAGAAGGTGATGTGGCTGGAGATGATGATGATGACGATGATGATTCACCTGATCCTGAAAGTCCAGATGATTCTGAAAGCGATTCAGAGTCAGAGAAAGAAGAATCTGCTGAAGAACTCCAAGCTGCTGAGCACCCTGATGAAGTGGAGGATCCCAAAAACAAAAAAGATGCAAAAAGCAATTATAAAATGA	CDS
IP_193570.1	RP	NUCB2	ATGGATTGGATCCTAATGACTTTGACCCCAAGACATTTTTCAAATTACATGATGTCAATAGTGATGGATTCCTGGATGAACAAGAATTAG	CDS
IP_193622.1	MS	ABCC8	ATGCCTTCGGGAGGCGCCTGGTCCTCAGCAGCACTTTCCGCATCTTGGCCGACCTGCTGGGCTTCGCCGGGCCACTGTGCATCTTTGGGATCGTGGACCACCTTGGGAAGGAGAACGACGTCTTCCAGCCCAAGACACAATTTCTCGGGGTTTACTTTGTCTCATCCCAAGAGTTCCTTGCCAATGCCTACGTCTTAG	CDS
IP_193746.1	MS and RP	HPS5	ATGGTTGGCTTTGGGCAGTTCAGGAGGAGGACTCCATCTCATTCAGAAAGAAGGCTGGAAGCACAGGCTTTTTCTTTCACACAGGGAAGGTGCAATTTCTCAAGTCGCCTGTTGTTTACATGA	5'UTR
IP_193812.1	RP	SPTY2D1	ATGAAGAGGAAGATGACGATGATGATGAATACGACTCTGAAATGGAAGATTTTATTGAAGATGAAGGAGAGCCTCAGGAAGAAATATCCAAGCACATTAGAGAAATCTTTGGTTATGACCGAAAAAAATACAAAGATGAAAGTGATTATGCCTTACGTTACATGGAAAGTAGTTGGAAAGAGCAGCAGAAGGAAGAAGCAAAGAGCTTAA	CDS
IP_193844.1	MS	PTPN5	ATGCCAACTACATCCGGGGCTATGGTGGGGAGGAGAAGGTGTACATCGCCACTCAGGGACCCATCGTCAGCACGGTCGCCGACTTCTGGCGCATGGTGTGGCAGGAGCACACGCCCATCATTGTCATGA	CDS
IP_194402.1	RP	CSTF3	ATGGAGACATTCCAGAGTATGTCCTGGCCTATATTGACTATCTTTCTCACCTCAATGAGGACAATAATACCCGAGTTTTGTTTGAACGAGTTTTAA	CDS
IP_194422.1	RP	HIPK3	ATGGAAACTTTGGGCACAGAAGACAGCAAGCTTATATTCCTACTAGTGTTACCAGTAATCCATTCACTCTTTCTCATGGAAGTCCCAATCACACAGCAGTGCATGCCCACCTGGCTGGAAATACACACCTCGGAGGACAGCCTACTCTACTTCCATACCCATCATCAGCCACCCTCAGTAGTGCTGCACCAGTGGCCCACCTGTTAG	CDS
IP_194514.1	RP	CAPRIN1	ATGAACAGTATGAACATGCCTCCATTCACCTGTGGGACCTGCTGGAAGGGAAGGAAAAACCTGTATGTGGAACCACCTATAAAGTTCTAA	CDS
IP_194517.1	RP	CAPRIN1	ATGTTTAATCGCCAAAAACACACTGGCCAGTGTACCATAATATGTTACCAGAAGAGTTATTATCTATTTGTTCTCCCTTTCAGGAAACTTATTGTAAAGGGACTGTTTTCATCCCATAAAGACAGGACTACAATTGTCAGCTTTCTATTACCTGGATATGGAAGGAAACTATTTTTACTCTGCATGTTCTGTCCTAAGCGTCATCTTGAGCCTTGCACATGA	3'UTR
IP_194518.1	RP	CAPRIN1	ATGGATACCGGGGCCCTGCCAATGGATTCAGAGGAGGATATGATGGTTACCGCCCTTCATTCTCTAACACTCCAAACAGTGGTTATACACAGTCTCAGTTCAGTGCTCCCCGGGATTACTCTGGCTATCAACGGGATGGATATCAGCAGAATTTCAAGCGAGGCTCTGGGCAGAGTGGACCACGGGGAGCCCCACGAGGTCGTGGAGGGCCCCCAAGACCCAACAGAGGGATGCCGCAAATGA	CDS
IP_194528.1	RP	NAT10	ATGGACAGTGTCAGAACAGTTCCAAGATCCAGACTTTGGTGGTCTGTCTGGTGGAAGGGTCGTTCGCATTGCTGTTCACCCAGATTATCAAGGGATGGGCTATGGCAGCCGTGCTCTGCAGCTGCTGCAGATGTACTATGA	CDS
IP_194560.1	RP	CAT	ATGTGGTTTTCACTGATGAAATGGCTCATTTTGACCGAGAGAGAATTCCTGAGAGAGTTGTGCATGCTAAAGGAGCAGGGGCCTTTGGCTACTTTGAGGTCACACATGACATTACCAAATACTCCAAGGCAAAGGTATTTGAGCATATTGGAAAGAAGACTCCCATCGCAGTTCGGTTCTCCACTGTTGCTGGAGAATCGGGTTCAGCTGACACAGTTCGGGACCCTCGTGGGTTTGCAGTGA	CDS
IP_194561.1	RP	CAT	ATGGTAACTGGGATCTCGTTGGAAATAACACCCCCATTTTCTTCATCAGGGATCCCATATTGTTTCCATCTTTTATCCACAGCCAAAAGAGAAATCCTCAGACACATCTGA	CDS
IP_194612.1	RP	CD44	ATGACACATATTGCTTCAATGCTTCAGCTCCACCTGAAGAAGATTGTACATCAGTCACAGACCTGCCCAATGCCTTTGATGGACCAATTACCATAA	CDS
IP_194823.1	RP	API5	ATGGAGAGAATGCTGGTAATGAAGAACCCAAGCTACAGTTCAGTTATGTGGAATGTTTGTTGTACAGTTTTCACCAGTTGGGCCGAAAACTTCCAGATTTCTTAA	CDS
IP_194854.1	RP	TTC17	ATGGTTCTGATGAGATGGAGAATTCAGATGAAACCAAAATGTCAGAAGAAATACTGGCTTTGGTGGATGAATTTCAACAGGCATGGCCTTTGGAAGGCTTTGGGGGTGCACTAG	CDS
IP_194871.1	MS	ALKBH3	ATGGTATGGAGAACTTCCTTACACTTATTCAAGAATCACTATGGAACCAAATCCTCACTGGCACCCTGTGCTGCGCACACTAAAGAACCGCATTGA	CDS
IP_195251.1	RP	ATG13	ATGAGAGCCCGGAACCACTCTTTGTGCCGCAGCTTCGCAGATTCCTATAGGCAATGGAAACTGATCTCAATTCCCAGGACAGAAAGGACCTGGACAAGTTTATTAAATTTTTTGCCCTCAAGACTGTCCAAGTGA	5'UTR
IP_195276.1	RP	ZNF408	ATGGAACCCTTCCGGAGAAGGCTGTACGCAGGGCCTCAAAGACGTCCCACCCGAGCCGACCCGAGACATCCTCGCTTTAAAGAGCCTTCCCCGGGGCTTGGCCCTTGGCCCCTCACTCGCCAAGGAACAGCGCTTGGGGGTCTGGTGTGTCGGGGACCCCCTGCAGCCCGGCCTGCTGTGGGGGCCGCTGGAAGAGGAGTCTGCCTCCAAGGAGAAGGGCGAGGGAGTAAAGCCACGGCAGGAGGAGAACCTGTCATTAGGCCCATGGGGAGACGTGTGTGCCTGTGA	CDS
IP_195286.1	RP	CKAP5	ATGCAGAATTTGAGAAGATGCAGGGACAAAGTCCACCTGCTCCAACCAGAGGAATTTCCAAGCATAGCACAAGTGGTACAGATGAAGGAGAAGATGGAGATGAACCAGATGACGGGAGCAATGATGTCGTTGATCTTTTGCCGAGGACGGAGATCAGTGATAAAATCACTTCAGAGTTGGTATCTAAGATTGGTGATAAGAATTGGAAGATTAGGAAAGAAGGCCTAG	CDS
IP_195287.1	RP	CKAP5	ATGAGATTGAGAATGACAATGGTACAGTCCGATGTGAAATGCCAGAACTTGTTCAGCACAAACTGGATGACATTTTTGAGCCAGTCCTTATTCCTGAACCCAAGATCCGGGCTGTTTCTCCACACTTCGATGACATGCACAGTAATACAGCATCCACAATCAATTTCATTATCTCCCAAGTAG	CDS
IP_195328.1	MS	ARFGAP2	ATGCCAAGAAGCAGGCGGAGGAGTCCATGGTCGCCTCCATGCGTCTGGCCTACCAGGAGCTCCAGATTGATCGTAAGAAAGAGGAAAAGAAGCTACAGAATCTGGAAGGGAAGAAGCGAGAGCAGGCAGAAAGGTTGGGCATGGGCTTGGTATCCCGAAGCTCTGTCTCCCACTCCGTGCTGTCTGAGATGCAGGTGA	CDS
IP_195334.1	RP	ARFGAP2	ATGCCAATGCGACGGCTTTTTTTCGCCAACATGGATGCACAGCCAATGATGCCAACACCAAATATAATAGCCGAGCTGCCCAGATGTACCGGGAGAAGATCCGGCAGCTGGGGAGTGCGGCCCTGGCTAGGCATGGCACTGATCTTTGGATAG	CDS
IP_195391.1	RP	MADD	ATGATACCTCTTTTGTCTTCACCCTCACTGACAAGGACACTGGAGTCACGCGATATGGCATCTGTGTTAACTTCTACCGCTCCTTCCAAAAGCGAATCTCTAAGGAGAAGGGGGAAGGTGGGGCAGGGTCCCGTGGGAAGGAAGGAACCCATGCCACCTGTGCCTCAGAAGAGGGTGGCACTGAGAGCTCAGAGAGTGGCTCATCCCTGCAGCCTCTCAGTGCTGACTCTACCCCTGATGTGA	CDS
IP_195441.1	MS and RP	SPI1	ATGACACGGATCTATACCAACGCCAAACGCACGAGTATTACCCCTATCTCAGCAGTGATGGGGAGAGCCATAGCGACCATTACTGGGACTTCCACCCCCACCACGTGCACAGCGAGTTCGAGAGCTTCGCCGAGAACAACTTCACGGAGCTCCAGAGCGTGCAGCCCCCGCAGCTGCAGCAGCTCTACCGCCACATGGAGCTGGAGCAGATGCACGTCCTCGATACCCCCATGGTGCCACCCCATCCCAGTCTTGGCCACCAGGTCTCCTACCTGCCCCGGATGTGCCTCCAGTACCCATCCCTGTCCCCAGCCCAGCCCAGCTCAGATGAGGAGGAGGGCGAGCGGCAGAGCCCCCCACTGGAGGTGTCTGACGGCGAGGCGGATGGCCTGGAGCCCG…	CDS
IP_195572.1	RP	FNBP4	ATGAAGAGGACAATTCTAGTTCCAGTGAAGAGGATCGGGAATCAACTGCACAGAAGCGAATTGAAGAGTGGAAACAGCAGCAGCTGGTTAGTGGCATGGCAGAGAGAAATGCTAATTTTGAAGCCCTTCCTGAGGATTGGAGAGCAAGGCTGA	CDS
IP_195576.1	RP	FNBP4	ATGGTAGTGTGTCAGGGTCTAGTCCACGTTCTGATATCAGCCAGCCAGCATCTCAAGATGGAATGCGTAGGCTTATGTCTAAAAGAGGAAAATGGAAGATGTTTGTTCGAGCTACCAGTCCAGAATCTACCAGTAGGAGTTCTAGTAAAACTGGACGAGATACTCCAGAAAATGGAGAAACTGCAATTGGTGCTGAAAATTCAGAAAAAATAG	CDS
IP_195590.1	RP	NUP160	ATGAATTCTCCCAGGAGGAGTTTCGAAATTTACAACAAGAATTCTGGTGCAAGTTCTATGCCTGTTGTCTTCAGTATCAAGAAGCCCTCTCTCACCCTCTTGCCCTACATTTGA	5'UTR
IP_196341.1	RP	PRPF19	ATGTTTATGAGCGGCGGCTCATCGAGAAGTACATTGCGGAGAATGGTACCGACCCCATCAACAACCAGCCTCTCTCCGAGGAGCAGCTCATCGACATCAAAGTTGCTCACCCAATCCGGCCCAAGCCTCCCTCAGCCACCAGCATCCCGGCCATTCTGA	CDS
IP_196342.1	RP	PRPF19	ATGAGTGGGATGCAGTCATGCTGCACAGCTTCACTCTGCGCCAGCAGCTGCAGACAACCCGCCAAGAGCTGTCACACGCTCTGTACCAGCACGATGCCGCCTGCCGTGTCATTGCCCGTCTCACCAAGGAAGTCACTGCTGCCCGAGAAGCTCTGGCTACCCTGA	CDS
IP_196343.1	RP	PRPF19	ATGAGACCTCCGGCTGCTCTCTCACCTGTGCACAGTTCCACCCTGACGGACTCATCTTTGGAACAGGAACCATGGACTCTCAGATCAAGATCTGGGACTTGA	CDS
IP_196344.1	RP	PRPF19	ATGTCGTTGTGTTTGACAAAAGTTCTGAACAAATCCTGGCTACCCTCAAAGGCCATACCAAGAAGGTCACCAGCGTGGTGTTTCACCCTTCCCAGGACCTGGTGTTTTCTGCTTCCCCCGATGCCACTATCAGGATTTGGTCGGTCCCCAATGCCTCTTGTGTACAGGTGGTTCGGGCCCATGAGAGTGCTGTGA	CDS
IP_196352.1	RP	TMEM109	ATGGGGAAAGCATGTGTTCAAAGCCATTCTGATGGTCCTAGTGGCCCTTATCCTCCTCCACTCAGCATTGGCCCAGTCCCGTCGAGACTTTGCACCACCAGGCCAACAGAAGAGAGAAGCCCCAGTTGA	CDS
IP_196438.1	RP	DDB1	ATGTGGTCACCGCCGAGGGGCTTCGGCCCGTCAAAGAGGTGGGCATGTATGGGAAGATTGCGGTCATGGAGCTTTTCAGGCCCAAGGGGGAGAGCAAGGACCTGCTGTTTATCTTGA	CDS
IP_196439.1	MS and RP	DDB1	ATGATGACAATTTTCTGGGGGCTGAAAATGCCTTTAACTTGTTTGTGTGTCAAAAGGATAGCGCTGCCACCACTGACGAGGAGCGGCAGCACCTCCAGGAGGTTGGTCTTTTCCACCTGGGCGAGTTTGTCAATGTCTTTTGCCACGGCTCTCTGGTAA	CDS
IP_196441.1	RP	DDB1	ATGAGACCTCCTTTGGAGAAGAGGTGGAGGTGCACAACCTACTTATCATTGACCAACACACCTTTGAAGTGCTTCATGCCCACCAGTTTCTGCAGAATGAATATGCCCTCAGTCTGGTTTCCTGCAAGCTGGGCAAAGACCCCAACACTTACTTCATTGTGGGCACAGCAATGGTGTATCCTGAAGAGGCAGAGCCCAAGCAGGGTCGCATTGTGGTCTTTCAGTATTCGGATGGAAAACTACAGACTGTGGCTGAAAAGGAAGTGA	CDS
IP_196443.1	MS and RP	DDB1	ATGGCTATCCTGACAGCCTGGCGCTGGCCAACAATAGCACCCTCACCATTGGCACCATCGATGAGATCCAGAAGCTGCACATTCGCACAGTTCCCCTCTATGAGTCTCCAAGGAAGATCTGCTACCAGGAAGTGTCCCAGTGTTTCGGGGTCCTCTCCAGCCGCATTGAAGTCCAAGACACGAGTGGGGGCACGACAGCCTTGA	CDS
IP_196513.1	RP	CPSF7	ATGGACGGGCCACACCCTCTGAGAACCTTGTACCCTCATCTGCTCGTGTGGATAAGCCCCCCAGTGTGCTGCCCTACTTCAATCGTCCTCCTTCGGCCCTTCCCCTGA	CDS
IP_196782.1	RP	EEF1G	ATGCCTTCGCCAGTGTCATCCTTTTTGGAACCAACAATAGCAGCTCCATTTCTGGAGTCTGGGTCTTCCGAGGCCAGGAGCTTGCCTTTCCGCTGA	CDS
IP_196784.1	RP	EEF1G	ATGCTAAAAAGTTTGCAGAGACCCAACCTAAAAAGGACACACCACGGAAAGAGAAGGGTTCACGGGAAGAGAAGCAGAAGCCCCAGGCTGAGCGGAAGGAGGAGAAAAAGGCGGCTGCCCCTGCTCCTGAGGAGGAGATGGATGAATGTGAGCAGGCGCTGGCTGCTGAGCCCAAGGCCAAGGACCCCTTCGCTCACCTGCCCAAGAGTACCTTTGTGTTGGATGAATTTAAGCGCAAGTACTCCAATGAGGACACACTCTCTGTGGCACTGCCATATTTCTGGGAGCACTTTGATAAGGACGGCTGGTCCCTGTGGTACTCAGAGTATCGCTTCCCTGAAGAACTCACTCAGACCTTCATGA	CDS
IP_196785.1	RP	EEF1G	ATGGCGGAAACTGGATCCTGGCAGCGAGGAGACCCAGACGCTGGTTCGAGAGTACTTTTCCTGGGAGGGGGCCTTCCAGCATGTGGGCAAAGCCTTCAATCAGGGCAAGATCTTCAAGTGAACATCTCTTGCCATCACCTAGCTGCCTGCACCTGCCCTTCAGGGAGATGGGGGTCATTAAAGGAAACTGAACATTGA	CDS
IP_196797.1	RP	MTA2	ATGAGACTATGGCAGGGGCAGGGGTTCCTTTCTCTGCCAATGGAAGGCCTCTGGCTTCAGGGATTCGTTCAAGCTCACAGCCAGCAGCCAAGCGTCAGAAACTAA	CDS
IP_196798.1	RP	MTA2	ATGGAAATGTGGAGGCAAAGGTTGTCTGTCTTTTCCGGCGCAGGGACATTTCTAGTAGCCTCAACAGCCTGGCTGATAGTAATGCCAGGGAGTTTGAAGAGGAATCAAAGCAGCCAGGGGTGTCTGAGCAGCAGCGCCATCAACTGA	CDS
IP_196812.1	RP	EML3	ATGAGAGCCGAGACCGGGAATGGGCTACCTACACCTGTGTGCTGGGCTTTCACGTCTACGGCGTCTGGCCGGACGGCTCCGATGGGACCGACATCAACTCCCTGTGCCGCTCCCACAACGAGCGCGTGGTGGCGGTGGCCGACGACTTCTGCAAAGTGCATCTCTTCCAGTACCCGTGCGCTCGTGCCAAGGCGCCGAGCCGCATGTACGGGGGCCACGGCAGCCACGTGA	CDS
IP_196830.1	RP	GANAB	ATGACCCCATCACTCTCTTTGTTGCACTTAGCCCTCAGGGTACAGCTCAAGGAGAGCTCTTTCTGGATGATGGGCACACGTTCAACTATCAGACTCGCCAAGAGTTCCTGCTGCGTCGATTCTCATTCTCTGGCAACACCCTTGTCTCCAGCTCAGCAGACCCTGAAGGACACTTTGAGACACCAATCTGGATTGAGCGGGTGGTGA	CDS
IP_196833.1	RP	GANAB	ATGTTCGCTGGATGTCAGAGACTGGCATCATTGACGTCTTCCTGCTGCTGGGGCCCTCCATCTCTGATGTTTTCCGGCAATATGCTAGTCTCACAGGAACCCAGGCGTTGCCCCCACTCTTCTCCCTCGGCTACCACCAGAGCCGTTGGAACTACCGGGACGAGGCTGATGTGCTGGAAGTGGATCAGGGCTTTGATGATCACAACCTGCCCTGTGATGTCATCTGGCTAG	CDS
IP_196835.1	RP	GANAB	ATGATCAGTACTTGCTTGGGGATGCGTTGCTGGTTCACCCTGTATCAGACTCTGGAGCCCATGGTGTCCAGGTCTATCTGCCTGGCCAAGGGGAGGTGTGGTATGACATTCAAAGCTACCAGAAGCATCATGGTCCCCAGACCCTGTACCTGCCTGTAA	CDS
IP_196904.1	RP	HNRNPUL2	ATGAGAAGGATGAACATGGCCGAGCTTACTATGAATTCCGAGAGGAGGCTTACCACAGCCGCTCAAAGTCTCCACTGCCTCCTGAAGAAGAGGCAAAAGATGAGGAGGAGGATCAAACTCTTGTGA	CDS
IP_196906.1	RP	HNRNPUL2	ATGGTGGCGAAGAGCAGGGCCTCGGCAAGAGGGAGGAAGACGAACCCGAGGAGCGGAGCGGGGACGAGACGCCGGGATCCGAGGTGCCGGGTGACAAGGCCGCCGAGGAACAGGGAGATGACCAGGATAGTGAAAAGTCAAAACCAGCAGGCTCAGATGGTGAGCGGCGGGGGGTAA	CDS
IP_196917.1	RP	POLR2G	ATGCTGTTGTCACTCAGGTCAACAAGGTTGGACTCTTCACAGAAATTGGGCCCATGTCTTGCTTCATCTCTCGACATTCCATCCCTTCAGAGATGGAGTTTGATCCTAACTCCAACCCACCATGTTACAAGACAATGGATGAGGATATTGTGA	CDS
IP_196931.1	RP	NXF1	ATGATGAACGCGTTAATTTCCCTCAAAGAAAGAAGAAAGGCCGGGGTCCCTTCCGGTGGAAATATGGTGAAGGAAACCGTAGGTCTGGAAGAGGCGGTTCTGGTATTCGGTCTTCCCGCCTTGAGGAAGATGATGGAGATGTGGCAATGA	CDS
IP_196954.1	RP	WDR74	ATGAACTTTGGGCATCCTTGGAGGCAGCTGCCAAGCGGAAGCTCTCGGGTTTGGAGCAGCCCCAAGGAGCTCTCCAAACGAGACGGAGAAAGAAGAAGCGGCCTGGGTCCACCAGCCCCTGACGCCCCTGTGCCCACTTTGTAA	CDS
IP_197064.1	RP	ATL3	ATGGCTCAAAGGTCACCTGTCGGGGACTACTGGAGTATTTTAAGGCATATATTAAAATTTATCAAGGAGAAGATCTGCCTCACCCCAAGTCCATGCTTCAGGCCACTGCTGAAGCCAACAACTTAG	CDS
IP_197167.1	RP	OTUB1	ATGATGAAGCCATCATGGCTCAGCAGGACCGAATTCAGCAAGAGATTGCTGTGCAGAACCCTCTGGTGTCAGAGCGGCTGGAGCTCTCGGTCCTATACAAGGAGTATGCTGAAGATGACAACATCTATCAACAGAAGATCAAGGACCTCCACAAAAAGTACTCGTACATCCGCAAGACCAGGCCTGACGGCAACTGTTTCTATCGGGCTTTCGGATTCTCCCACTTGGAGGCACTGCTGGATGACAGCAAGGAGTTGCAGCGGTTCAAGGCTGTGTCTGCCAAGAGCAAGGAAGACCTGGTGTCCCAGGGCTTCACTGAATTCACAATTGAGGATTTCCACAACACGTTCATGGACCTGA	CDS
IP_197256.1	RP	FKBP2	ATGTCCTGCACATGCACTACACGGGGAAGCTGGAAGATGGGACAGAGTTTGACAGCAGCCTGCCCCAGAACCAGCCCTTTGTCTTCTCCCTTGGCACAGGCCAGGTCATCAAGGGCTGGGACCAGGGGCTGCTGGGGATGTGTGAGGGGGAAAAGCGCAAGCTGGTGA	CDS
IP_197282.1	RP	BAD	ATGGAGGCGCTGGGGCTGTGGAGATCCGGAGTCGCCACAGCTCCTACCCCGCGGGGACGGAGGACGACGAAGGGATGGGGGAGGAGCCCAGCCCCTTTCGGGGCCGCTCGCGCTCGGCGCCCCCCAACCTCTGGGCAGCACAGCGCTATGGCCGCGAGCTCCGGAGGATGA	CDS
IP_197308.1	RP	ESRRA	ATGCCGAGGCTGTGGAGCAGCTGCGAGAAGCTCTGCACGAGGCCCTGCTGGAGTATGAAGCCGGCCGGGCTGGCCCCGGAGGGGGTGCTGAGCGGCGGCGGGCGGGCAGGCTGCTGCTCACGCTACCGCTCCTCCGCCAGACAGCGGGCAAAGTGCTGGCCCATTTCTATGGGGTGA	CDS
IP_197563.1	MS and RP	SAC3D1	ATGGGCGGCCCGAAGGCCGGGGATCATGGCGGGAAGGCGGGCCCAGACAGGTTCAGCCCCGCCCCGACCCGCCGCTCCCCACCCCCCGGCCGGCCTCGCGTGCCTTCCCGCAGCACTGCCGTCCCCGGGATGCTGAGCGCCCACCGTCTCCCCGCAGCCCCCTCATGCCCGGCTGCGAGCTGCCCGTGGGCACCTGCCCGGACATGTGCCCGGCCGCCGAGCGCGCCCAGCGCGAAAGGGAGCACCGCCTGCACCGCTTGGAGGTGGTGCCGGGTTGCCGCCAGGACCCGCCCCGCGCGGATCCGCAGCGCGCGGTGA	5'UTR
IP_197618.1	RP	MRPL49	ATGAATATCAGTTTGTGGAGCGCCTGTTACCGGCTACCAGGATCCCAGATCCCCCAAAGCATGAACATTATCCTACCCCTAGTGGCTGGCAGCCTCCCAGAGACCCCCCACCCAACCTGCCTTACTTTGTACGACGCTCTCGGATGCACAACATCCCCGTCTACAAGGACATCACGCATGGCAACCGGCAGATGA	CDS
IP_197626.1	RP	SYVN1	ATGTGCTGCACTCCGTGGACCTCCAGAGTGAGAACCCCTGGGACAACAAGGCTGTGTACATGCTCTACACAGAGCTGTTTACAGGCTTCATCAAGGTTCTGCTGTACATGGCCTTCATGA	CDS
IP_197629.1	RP	SYVN1	ATGACTTCAGCCCCCGCTTTGTTGCACTCTTCACTCTTCTTCTCTTCCTCAAATGTTTCCACTGGCTGGCTGAGGACCGTGTGGACTTTATGGAACGCAGCCCCAACATCTCCTGGCTCTTTCACTGCCGCATTGTCTCTCTTATGTTCCTCCTGGGCATCCTGGACTTCCTCTTCGTCAGCCACGCCTATCACAGCATCCTGA	CDS
IP_197671.1	RP	DPF2	ATGCCATGGAGCAGTGCCACAATTACAATGCTCGCCTCTGTGCTGAGCGCAGCGTGCGCCTGCCTTTCTTGGACTCACAGACCGGAGTAG	CDS
IP_197673.1	RP	DPF2	ATGACTTCCTGGATGACCTCGATGATGAAGACTATGAAGAAGATACTCCCAAGCGTCGGGGAAAGGGGAAATCCAAGGGTAAGGGTGTGGGCAGTGCCCGTAAGAAGCTGGATGCTTCCATCCTGGAGGACCGGGATAAGCCCTATGCCTGTGACATTTGTGGAAAACGTTACAAGAACCGACCAGGCCTCAGTTACCACTATGCCCACTCCCACTTGGCTGAGGAGGAGGGCGAGGACAAGGAAGACTCTCAACCACCCACTCCTGTTTCCCAGAGGTCTGAGGAGCAGAAATCCAAAAAGGGTCCTGATGGATTGGCCTTGCCCAACAACTACTGTGACTTCTGCCTGGGGGACTCAAAGATTAACAAGAAGACGGGACAACCCGAGGAGCTGGTGT…	CDS
IP_197785.1	RP	MAP3K11	ATGGAGAGCGGCGAGCATGCTGGGCTTGGGGTCCCAGTTCCCCCAAGCCTGGGGAAGCCCAGAATGGGAGGAGAAGGTCCCGCATGGACGAAGCCACATGGTACCTGGATTCAGATGACTCATCCCCCTTAG	CDS
IP_197791.1	RP	PCNXL3	ATGCCATGTTTGACCAGGGCGAGATCGTGGAGAAGCGCAGCTCTACCATGGGGGAGCTGGAGGAAGAGCCTGCCCAGGGGGACAGCAATCCACCCAGGGACCCCGGAGTGGAGATGA	CDS
IP_197821.1	RP	RELA	ATGATGAAGACCTGGGGGCCTTGCTTGGCAACAGCACAGACCCAGCTGTGTTCACAGACCTGGCATCCGTCGACAACTCCGAGTTTCAGCAGCTGCTGA	CDS
IP_197901.1	RP	CFL1	ATGTGGGCCAGACTGTCGACGACCCCTACGCCACCTTTGTCAAGATGCTGCCAGATAAGGACTGCCGCTATGCCCTCTATGATGCAACCTATGAGACCAAGGAGAGCAAGAAGGAGGATCTGGTGTTTATCTTCTGGGCCCCCGAGTCTGCGCCCCTTAAGAGCAAAATGA	CDS
IP_197940.1	RP	DRAP1	ATGGGGACAAGGGCGCCCGCAGGGGCCGGAAGCCAGGCAGCGGCGGCCGGAAGAACGGTGGGATGGGAACGAAAAGCAAGGACAAGAAGCTGTCCGGGACAGACTCGGAGCAGGAGGATGAATCTGAGGACACAGATACTGATGGGGAAGAGGAGACATCACAACCCCCACCCCAGGCCAGCCACCCCTCTGCCCACTTTCAGAGCCCCCCGACACCCTTCCTGCCCTTCGCCTCTACTCTGCCTTTGCCCCCAGCGCCCCCGGGCCCCTCAGCACCTGATGAAGAGGACGAAGAAGATTACGACTCCTAGCGCCTTCTGCCCCCCAGACCATAGCCCCTTTTAG	CDS
IP_197984.1	RP	SF3B2	ATGGGGACAAAGCCGCTCCACCTCCCATGTCGGCACAGCTCCCTGGAATTCCCATGCCACCACCACCTTTGGGACTCCCCCCTCTGCAGCCTCCTCCGCCACCCCCACCACCTCCACCAGGCCTTGGCCTTGGCTTTCCTATGGCCCACCCACCAAATTTGGGGCCCCCGCCTCCTCTCCGTGTGGGTGAGCCAGTGGCACTGTCAGAGGAGGAGCGGCTGA	CDS
IP_197986.1	RP	SF3B2	ATGCTGGTGGCTGGGGCAAACCTCCAGTGGATGAGACTGGGAAACCGCTCTATGGGGACGTGTTTGGAACCAATGCTGCTGAATTTCAGACCAAGACTGAGGAAGAAGAGATTGATCGGACCCCTTGGGGGGAACTGGAACCATCTGATGAAGAATCCTCAGAAGAAGAGGAAGAGGAAGAAAGTGATGAAGACAAACCAGATGAGACAGGCTTTATTACCCCTGCAGACAGTGGCCTTATCACTCCTGGAGGCTTTTCATCAGTGCCTGCTGGAATGGAGACCCCTGAACTCATTGAGCTGA	CDS
IP_198050.1	MS	CD248	ATGGTCACGTGTCCTGCCGCTGCACTGAGGGCTTCCGGCTGGCAGCAGACGGGCGCAGTTGCGAGGACCCCTGTGCCCAGGCTCCGTGCGAGCAGCAGTGTGAGCCCGGTGGGCCACAAGGCTACAGCTGCCACTGTCGCCTGGGTTTCCGGCCAGCGGAGGATGATCCGCACCGCTGTGTGGACACAGATGAGTGCCAGATTGCCGGTGTGTGCCAGCAGATGTGTGTCAACTACGTTGGTGGCTTCGAGTGTTATTGTAGCGAGGGACATGAGCTGGAGGCTGATGGCATCAGCTGCAGCCCTGCAGGGGCCATGGGTGCCCAGGCTTCCCAGGACCTCGGAGATGAGTTGCTGGATGACGGGGAGGATGAGGAAGATGAAGACGAGGCCTGGAAGG…	CDS
IP_198097.1	RP	MRPL11	ATGTGTATGAGATTGCCCGCATCAAAGCTCAGGATGAGGCATTTGCCCTGCAGGATGTACCCCTGTCGTCTGTTGTCCGCTCCATCATCGGGTCTGCCCGTTCTCTGGGCATTCGCGTGGTGA	CDS
IP_198120.1	RP	DPP3	ATGACATCGGCGTGTCTAGCCTGGACTGCCGTGAGGCCTTCCGCCTGCTGTCACCCACAGAGCGCCTCTATGCCTACCACCTGTCCCGTGCCGCCTGGTACGGAGGCCTGGCTGTGCTGCTTCAGACCTCCCCTGAGGCCCCCTACATCTATGCTCTGCTCAGCCGCCTCTTCCGCGCCCAGGACCCCGACCAGCTGCGCCAACATGCCCTGGCTGAAGGCCTTACCGAGGAGGAGTATCAGGCGTTCCTGGTCTATGCCGCGGGTGTTTACTCCAACATGGGCAACTACAAGTCCTTTGGTGACACCAAGTTTGTTCCCAACTTGCCCAAGGAAAAGCTGGAACGGGTGA	CDS
IP_198121.1	RP	DPP3	ATGTGCTGGCTGTGGCCTACGCCACGCAGCGGGAGAAGCTTACCTTTCTGGAGGAGGATGACAAGGACCTGTACATCCTCTGGAAGGGGCCCTCCTTCGATGTGCAGGTGGGCCTGCACGAGCTGCTGGGCCATGGCAGTGGCAAGCTCTTCGTACAGGACGAAAAAGGAGCATTCAACTTTGACCAGGAAACAGTGA	CDS
IP_198191.1	RP	RBM4	ATGCCTTCGTACACATGGAGCGGGCAGAGGATGCAGTGGAGGCCATCAGGGGCCTTGATAACACAGAGTTTCAAGGCAAACGAATGCACGTGCAGTTGTCCACCAGCCGGCTTAGGACTGCGCCCGGGATGGGAGACCAGAGCGGCTGCTATCGGTGCGGGAAAGAGGGGCACTGGTCCAAAGAGTGTCCGATAG	CDS
IP_198196.1	RP	RBM4B	ATGCCTTCGTACACATGGAGCGGGCAGAGGATGCAGTGGAGGCCATCAGGGGCCTTGACAACACAGAGTTTCAAGGCAAAAGAATGCATGTGCAGTTGTCCACAAGCCGGCTTCGGACTGCCCCTGGTATGGGAGACCAGAGTGGCTGCTATCGGTGTGGGAAAGAAGGGCACTGGTCCAAAGAGTGCCCAGTAG	CDS
IP_198278.1	RP	KDM2A	ATGTCGAAAATGCAAAGCCTGTGTGCAAGGAGAGTGTGGTGTTTGCCACTACTGCAGAGACATGAAGAAGTTTGGGGGGCCTGGACGCATGAAGCAGTCCTGTGTCCTCCGACAGTGCTTGGCACCCAGACTGCCTCACTCAGTCACATGTTCCCTCTGTGGAGAGGTGGATCAGAATGA	CDS
IP_198285.1	MS	KDM2A	ATGTTTTTGGCAAATACATTGGTGAAGGCCTCCTTCAGCGTGGTACCATGCGACGACGCTATGAAGATGATGGCATTTCAGATGATGAAATTGAAGGAAAAAGAACTTTTGACTTGGAAGAGAAACTGCACACCAACAAATATAATGCCAATTTTGTTACTTTTATGGAAGGAAAAGATTTTAATGTAG	5'UTR
IP_198308.1	RP	ANKRD13D	ATGCCAACGTGGGCAAAGAGAACCGCCAGGGCTGGGCAGTCCTGCAGGAGGCAGTCAGCACTGGAGACCCCGAGATGGTGCAGCTGGTGCTCCAGTATCGGGACTACCAGAGGGCCACGCAGAGGCTGGCGGGCATTCCGGAACTGCTCAACAAACTTCGCCAGGCCCCCGATTTCTACGTTGAGATGA	CDS
IP_198399.1	RP	CORO1B	ATGTGTTCGGGCAGCCGGTCAAGAACGACCAGTGCTATGAGGACATTCGCGTGTCCCGTGTTACCTGGGACAGCACCTTCTGCGCCGTCAACCCCAAGTTCCTGGCGGTGA	CDS
IP_198423.1	MS and RP	TMEM134	ATGATGCCTTCGAGCTGTCCCTGGAGGACGGGGGCCCTGGGCCCGAGTCCAGCGGGGTCGCGCGCTTTGGGCCGCTGCACTTCGAGCGTCGGGCCCGGTTCGAGGTGGCTGACGAGGACAAGCAGTCCCGGCTGCGCTACCAGAACCTGGAGAACGATGAGGATGGAGCCCAGGCCTCTCCGGAGCCGGATGGGGGAGTCGGCACCAGGGATTCCAGCCGAACTTCCATCCGCAGCTCCCAGTGGTCCTTCAGCACCATCAGCAGCAGCACCCAGCGCTCCTACAACACCTGCTGCAGCTGGACCCAACACCCTTTGA	CDS
IP_198782.1	MS	ANO1	ATGCCGAGTGCAAGTATGGCCTGTACTTCAGGGACGGCCGGCGCAAGGTGGACTACATCCTGGTGTACCATCACAAGAGGCCCTCGGGCAACCGGACCCTGGTCAGGAGGGTGCAGCACAGCGACACCCCCTCTGGGGCTCGCAGCGTCAAGCAGGACCACCCCCTGCCGGGCAAGGGGGCGTCGCTGGATGCAGGCTCGGGGGAGCCCCCGATGGACTACCACGAGGATGACAAGCGCTTCCGCAGGGAGGAGTACGAGGGCAACCTCCTGGAGGCGGGCCTGGAGCTGGAGCGGGACGAGGACACTAAAATCCACGGAGTCGGGTTTGTGA	CDS
IP_198998.1	RP	NUMA1	ATGCCTGGTATCTGCACAGAAGGTGCTAGAGGGATCAGAGCTGGAACTGGCGAAGATGACCATGCTGCTCTTATACCACTCTACCATGAGCTCCAAAAGTCCCAGGGACTGGGAACAGTTTGA	CDS
IP_199032.1	RP	LAMTOR1	ATGCCTACAGTGCACTTTCTCAGATCCGTGTGGACGCAAAAGAGGAGCTGGTTGTACAGTTTGGGATCCCATGAAGAGAGGGGTCCTTGGACAGCTCTTCTCCTCTCTTCATCCCATCTCTACCCCACCCCCTTGGCCCCCAGCCTCACTGCGGCTTATACAGTACCCTAA	CDS
IP_199033.1	RP	LAMTOR1	ATGGAGCCGAGCCCAACTACCACAGCCTGCCTTCCGCTCGCACTGATGAGCAGGCCCTGCTCTCTTCCATCCTTGCCAAGACAGCCAGCAACATCATTGATGTGTCTGCTGCAGACTCACAGGGCATGGAGCAGCATGAGTACATGGACCGTGCCAGGCAGTACAGCACCCGCTTGGCTGTGCTGA	CDS
IP_199295.1	RP	FAM168A	ATGCCCAGGGAGCCTACTACACACAGCCGGTGTATGCTGCCCAGCCTCATGTCATCCACCATACCACGGTCGTCCAGCCCAACAGCATTCCCTCTGCTATCTACCCAGCACCTGTTGCCGCCCCGAGGACCAACGGTGTGGCCATGGGCATGGTGGCAGGCACCACCATGGCAATGTCAGCAGGTACCCTGCTGA	CDS
IP_199356.1	RP	UCP2	ATGACCATTAGGTGTTTCGTCTCCCACCCATTTTCTATGGAAAACCAAGGGGATCGGGCCATGATAGCCACTGGCAGCTTTGAAGAACGGGACACCTTTAGAGAAGCTTGA	5'UTR
IP_199684.1	RP	UVRAG	ATGAACATAAGGATTACTTTGTATGCGGTGTCAAGTTGCCTAATTCTGAGGACTTCCAAGCAAAAGATGATGGAAGCATTGCTGTTGCCCTTGGTTATACTGCACATCTGGTCTCCATGA	CDS
IP_199688.1	RP	UVRAG	ATGATGGATACTATGGTGCTCCATTTGAACATAAGGGTTATTCAAATGCTCAGAAGACTATTCTTCTGCAGGTGGATCAGAACTGTGTTCGCAATTCTTACGATGTCTTCTCTTTGCTACGGCTTCATAGAGCCCAGTGTGCAATTAAACAGACTCAGGTAA	CDS
IP_199736.1	RP	C11orf30	ATGAGCCCCGAAAGGCCGGGCAGGGAGGACAAGCTCTTTGGGGCTACCAAACAGAAGCAGCAATGCCTGTTGTGTGGCCAACCCTTCTGGATCTCAGCAGGGATGAATGCAAAAGAATTCTTCGAAAATTGGAATTGGAGGCATATGCTGGAGTTATCAGTGCACTTCGGGCACAGGGGGATCTCACCAAGGAAAAGAAAGATCTTCTTGGAGAACTATCAAAAGTTCTTAGCATCTCAACAGAACGCCACCGTGCTGAAGTTCGGAGAGCAGTAA	5'UTR
IP_199846.1	MS	PAK1	ATGGTTCTAAACCTCTGCCTCCAAACCCAGAGGAGAAGAAAAAGAAGGACCGATTTTACCGATCCATTTTACCTGGAGATAAAACAAATAAAAAGAAAGAGAAAGAGCGGCCAGAGATTTCTCTCCCTTCAGATTTTGAACACACAATTCATGTCGGTTTTGATGCTGTCACAGGGGAGTTTACGGGAATGCCAGAGCAGTGGGCCCGCTTGCTTCAGACATCAAATATCACTAAGTCGGAGCAGAAGAAAAACCCGCAGGCTGTTCTGGATGTGTTGGAGTTTTACAACTCGAAGAAGACATCCAACAGCCAGAAATACATGA	CDS
IP_199859.1	MS and RP	CLNS1A	ATGCCAAATTTGAAGAAGAATCAAAAGAACCTGTTGCTGATGAAGAAGAGGAAGACAGTGATGATGATGTTGAACCTATTACTGAATTTAGATTTGTGCCTAGTGATAAATCAGCGTTGGAGGCAATGTTCACTGCAATGTGCGAATGCCAGGCCTTGCATCCAGATCCTGAGGATGAGGATTCAGATGACTACGATGGAGAAGAATATGATGTGGAAGCACATGAACAAGGACAGGGGGACATCCCTACATTTTACACCTATGAAGAAGGATTATCCCATCTAA	CDS
IP_199867.1	RP	RSF1	ATGATCTGGACAGTGATAGCAACCTGGATGAAGAAGAGAGCGAGGATGAATTCAAGATCAGTGATGGATCTCAAGATGAGTTTGTTGTGTCTGATGAAAACCCAGATGAAAGTGAAGAAGATCCGCCATCTAATGATGACAGTGACACTGACTTTTGTAGCCGTAGACTGA	CDS
IP_200027.1	MS	TENM4	ATGAGACAGGCTTCATCCAGTATTTGGATTCAGGAATCTGGCACTTGGCTTTTTACAATGACGGAAAGGAGTCAGAAGTGGTTTCCTTTCTCACCACTGCCATTGAGTCGGTGGATAACTGCCCCAGCAACTGCTATGGCAATGGTGACTGCATCTCTGGGACCTGCCACTGCTTCCTGGGTTTCCTGGGCCCCGACTGTGGCAGAGCCTCCTGCCCCGTGCTCTGTAGCGGAAATGGCCAATACATGA	CDS
IP_200282.1	RP	EED	ATGCAATTAAGGAATCTTATGATTATAATCCAAATAAAACTAACAGGCCATTTATTTCTCAGAAAATCCATTTTCCTGATTTTTCTACCAGAGACATACATAGGAATTATGTTGATTGTGTGCGATGGTTAG	CDS
IP_200391.1	RP	CTSC	ATGCTCAAGGCTGTGAAGGCGGCTTCCCATACCTTATTGCAGGAAAGTACGCCCAAGATTTTGGGCTGGTGGAAGAAGCTTGCTTCCCCTACACAGGCACTGATTCTCCATGCAAAATGA	CDS
IP_200523.1	RP	CHORDC1	ATGCTGGGAAAAAAGTTGTTCCATGTAGACATGACTGGCATCAGACTGGAGGTGAAGTTACCATTTCAGTATATGCTAAAAACTCACTTCCAGAACTTAGCCGAGTAG	CDS
IP_200533.1	MS	FAT3	ATGAAAATGACAACAAGCCCCAGTTCCCAGAGAAGGTCTACCAGATCAAGCTGCCAGAACGTGACCGAAAGAAGAGAGGAGAACCGATTTACAGGGCTTTTGCATTTGATAGAGATGAGGGCCCCAACGCAGAAATCTCCTACAGTATTGTGGATGGGAATGATGACGGAAAGTTCTTTATTGACCCTAAAACTGGGATGGTTTCTTCTAGAAAGCAGTTTACAGCAGGCAGTTATGACATCCTAA	CDS
IP_200793.1	RP	CWC15	ATGCCCCTGAAGAGGTTCGTAACCGTGACTTCAGGAGAGAGTTGGAAGAAAGAGAGAGAGCTGCTGCAAGAGAGAAAAATAGGGATCGTCCAACCCGAGAACATACAACCTCCTCTTCAGTGTCAAAAAAGCCACGGTTAG	CDS
IP_201328.1	MS	KBTBD3	ATGCACCAGATGAAATCACAGATGAAGTGCAGGTCTACCACAGCAACAGGTCTGAATGGGAAGAAGTTTCACCAATGCCTAGAGCCTTAA	CDS
IP_201379.1	RP	CWF19L2	ATGGAGACTATTACACCCTGGATGACATGTTTGTCTCCAAAGCAGCTGAGAGAGAACGTCTTGGTGAAGAGGAAGAGAACCAAAGGAAAAAAGCTATTGCTGAGCATCGGAGTCTTGCTGCACAAATGGAAAAATGTCTGTATTGTTTTGACAGCTCTCAATTTCCCAAGCATCTTATTGTTGCAATAG	CDS
IP_201569.1	RP	RDX	ATGATGAGATATATTGCCCGCCAGAAACTGCAGTTCTTTTGGCTTCCTATGCTGTCCAAGCCAAGTATGGAGATTACAATAAAGAGATTCATAAGCCAGGCTACCTGGCTAATGATAGACTCCTACCCCAGCGTGTATTGGAACAACACAAACTAA	CDS
IP_201578.1	RP	RDX	ATGAAACCAAGAAAACACAAAATGATGTTCTTCATGCTGAGAATGTTAAAGCAGGCCGTGATAAGTACAAGACTCTGCGACAGATTCGACAAGGCAATACAAAGCAGCGTATCGATGAGTTTGAAGCAATGTGAGAGCTGTTATTTTGCATATATGTTCTTCATAAGCTGA	CDS
IP_201729.1	RP	ALG9	ATGTCTCTGTGGCGCTGTGGCTCTCTCTGCACTTCAGAAATGTTACCACTTTGTGTTTCAACGATATCGCCTGGAGCACTATACTGTGACATCGAATTGGCTGGCATTAGGAACTGTCTTCCTGTTTGGGCTCTTGTCATTTTCTCGCTCTGTGGCACTGTTCAGAGGATATCACGGGCCCCTTGA	CDS
IP_201800.1	RP	DLAT	ATGTTCCCATCGGAGCGATCATCTGTATCACAGTTGGCAAGCCTGAGGATATTGAGGCCTTTAAAAATTATACACTGGATTCCTCAGCAGCACCTACCCCACAAGCGGCCCCAGCACCAACCCCTGCTGCCACTGCTTCGCCACCTACACCTTCTGCTCAGGCTCCTGGTAGCTCATATCCCCCTCACATGCAGGTACTTCTTCCTGCCCTCTCTCCCACCATGA	CDS
IP_202013.1	RP	RBM7	ATGGGTCTGACCATCATTACAGAGGAAAGAGAGATGATTTCTTCTATGAAGACAGGAATCATGATGACTGGAGCCATGACTATGATAACAGAAGAGACAGTAGTAGAGATGGAAAATGGCGCTCATCTCGACACTAACACATGTTAA	CDS
IP_202095.1	RP	SIK3	ATGCTAGTGGAGGGGAAATATTTGACCACCTGGTGGCCCATGGTAGAATGGCAGAAAAGGAGGCACGTCGGAAGTTCAAACAGATCGTCACAGCTGTCTATTTTTGTCACTGTCGGAACATTGTTCATCGTGATTTAA	CDS
IP_202125.1	RP	PAFAH1B2	ATGCAGCAGAAGATATTCAAGGAGATGACCGATGGATGTCTCAGCACAACAGATTTGTTTTGGACTGTAAAGACAAAGAGCCTGATGTACTGTTCGTGGGAGACTCCATGGTGCAGTTAA	CDS
IP_202254.1	MS	DSCAML1	ATGGGGTGGTGGTCCAAGCCTTCAATCGGGCTGGCACGGGGCCCTCTTCCAGCGAGATCAATGCCACCACTCTGGAGGATGTGCCCAGCCAGCCCCCTGAGAACGTCCGGGCCCTGTCCATCACTTCTGACGTGGCCGTCATCTCCTGGTCAGAGCCCCCGCGCAGCACCCTCAATGGCGTCCTCAAAGGCTATCGGGTCATCTTCTGGTCCCTCTATGTTGATGGGGAGTGGGGCGAGATGCAGAACATCACCACCACGCGGGAGCGGGTGGAGCTGCGGGGCATGGAGAAGTTCACCAACTACAGCGTCCAGGTGCTGGCCTACACCCAGGCTGGGGACGGCGTACGCAGCAGTGTGCTCTACATCCAGACCAAGGAGGACGTTCCAGGTCCCCCTG…	CDS
IP_202444.1	RP	UBE4A	ATGCAGGAGAGAGGCACATTTTTTGTTACCTTTACTCCTGCTTCCAGAGAGCCAAGGAAGAGATTACCAAAGTTCCAGAGAACCTGCTACCCTTTGCAGTGCAGTGCAGAAACCTCACTGTGTCCAATACCCGAACAGTTCTTCTCACCCCAGAGATCTATGTTGACCAAAACATCCATGAGCAACTGGTAG	CDS
IP_202446.1	RP	UBE4A	ATGAACTCCCAGCTAGCCCAGATGACTCGGATAATAGCGTGTCAGAGAGCCTGGATGAATTCGATTACTCTGTGGCTGAGATTAGCCGCTCATTCCGATCACAGCAGGAAATATGTGAGCAACTCAACATCAATCACATGA	CDS
IP_202459.1	RP	KMT2A	ATGAAGAAGTCAGAGTGCGAAGTCCCACAAGGTCTCCTTCAGTTAAAACTAGTCCTCGAAAACCTCGTGGGAGACCTAGAAGTGGCTCTGACCGAAATTCAGCTATCCTCTCAGATCCATCTGTGTTTTCCCCTCTAA	CDS
IP_202521.1	RP	ARCN1	ATGAAATTGTCGCACTGGGATACCGGGAGAATGTTAACTTGGCACAGATCAGAACCTTCACAGAAATGGATTCTCATGAGGAGAAGGTGTTCAGAGCCGTCAGAGAGACTCAAGAACGTGAAGCTAAGGCTGAGATGCGTCGTAAAGCAAAGGAATTACAACAGGCCCGAAGAGATGCAGAGAGACAGGGCAAAAAAGCACCAGGATTTGGCGGATTTGGCAGCTCTGCAGTATCTGGAGGCAGCACAGCTGCCATGA	CDS
IP_202635.1	RP	TRAPPC4	ATGGCAGGTACACGGCCGACGGGAAAGAGGTGCTGGAGTATCTGGGTAACCCTGCTAATTACCCGGTGTCCATTCGATTTGGCCGGCCCCGCCTCACTTCTAATGAGAAGCTTATGCTGGCCTCCATGTTCCACTCGCTCTTTGCCATCGGCTCCCAGCTGTCTCCTGAACAGGGAAGCTCAGGCATTGAGATGCTGGAGACAGACACATTCAAATTGCACTGCTACCAGACACTGA	CDS
IP_202649.1	RP	HYOU1	ATGACAACACCGCCACTGCCCTCAGCTATGGTGTCTTCCGCCGGAAAGATATTAACACCACTGCCCAGAATATCATGTTCTATGACATGGGCTCAGGCAGCACCGTATGCACCATTGTGA	CDS
IP_202650.1	RP	HYOU1	ATGCCAAGGAGAATGGTACTGATACTGTCCAGGAGGAAGAGGAGAGCCCTGCAGAGGGGAGCAAGGACGAGCCTGGGGAGCAGGTGGAGCTCAAGGAGGAAGCTGAGGCCCCAGTGGAGGATGGCTCTCAGCCCCCACCCCCTGAACCTAAGGGAGATGCAACCCCTGAGGGAGAAAAGGCCACAGAAAAAGAAAATGGGGACAAGTCTGAGGCCCAGAAACCAAGTGAGAAGGCAGAGGCAGGGCCTGAGGGCGTCGCTCCAGCCCCAGAGGGAGAGAAGAAGCAGAAGCCCGCCAGGAAGCGGCGAATGGTAG	CDS
IP_202710.1	RP	HINFP	ATGTCACTCAGCACCTGCAGCAGCACCTGCATGGCTCTGGGGAGGAGGAGGAAGAGGAAGAGGAGGATGACCCACTTGAGGAAGAATTCTCCTGCTTGTGGCAGGAATGTGGCTTTTGTTCTCTGGACAGTTCTGCTGACCTCATCCGCCATGTCTACTTCCACTGCTACCACACCAAGCTGA	CDS
IP_202941.1	MS	ARHGEF12	ATGACTGAATGGAGTTTTGAGTTGGACTTTTGTGTCCCTGACGGAGTTGGGCCTGATCCCAGAGCACTGGGGGTGGGGAGGAGGTGTTACTGTAAAATGCAAGTTGGATAA	5'UTR
IP_203049.1	RP	SORL1	ATGACCTGGCCTCGGGAGCCACCGAGCAGTTGCCTCTCACCGGGCTACGGGCAGCAGTGGCCCTGGACTTTGACTATGAGCACAACTGTTTGTATTGGTCCGACCTGGCCTTGGACGTCATCCAGCGCCTCTGTTTGA	CDS
IP_203056.1	RP	SORL1	ATGAGAGAAACTGCCCTACCACCATCTGTGACCTGGACACCCAGTTTCGTTGCCAGGAGTCTGGGACTTGTATCCCACTGTCCTATAAATGTGACCTTGAGGATGACTGTGGAGACAACAGTGATGAAAGTCATTGTGAAATGCACCAGTGCCGGAGTGACGAGTACAACTGCAGTTCCGGCATGTGCATCCGCTCCTCCTGGGTATGTGACGGGGACAACGACTGCAGGGACTGGTCTGATGAAGCCAACTGTACCGCCATCTATCACACCTGTGAGGCCTCCAACTTCCAGTGCCGAAACGGGCACTGCATCCCCCAGCGGTGGGCGTGTGACGGGGATACGGACTGCCAGGATGGTTCCGATGAGGATCCAGTCAACTGTGAGAAGAAGTGCAATG…	CDS
IP_203060.1	RP	SORL1	ATGATTGCGGCGATTATTCTGATGAAGCCAACTGCGAAAACCCCACAGAAGCCCCAAACTGCTCCCGCTACTTCCAGTTTCGGTGTGAGAATGGCCACTGCATCCCCAACAGATGGAAATGTGACAGGGAGAACGACTGTGGGGACTGGTCTGATGAGAAGGATTGTGGAGATTCACATATTCTTCCCTTCTCGACTCCTGGGCCCTCCACGTGTCTGCCCAATTACTACCGCTGCAGCAGTGGGACCTGCGTGA	CDS
IP_203061.1	MS and RP	SORL1	ATGAAGGGGAGACCTGGAAAACATTCATCTTCTCTGAGAAGCCAGTGTTTGTGTATGGCCTCCTCACAGAACCTGGGGAGAAGAGCACTGTCTTCACCATCTTTGGCTCGAACAAAGAGAATGTCCACAGCTGGCTGA	CDS
IP_203118.1	RP	HSPA8	ATGAAGCTGTTGCTTATGGTGCAGCTGTCCAGGCAGCCATCTTGTCTGGAGACAAGTCTGAGAATGTTCAAGATTTGCTGCTCTTGGATGTCACTCCTCTTTCCCTTGGTATTGAAACTGCTGGTGGAGTCATGA	CDS
IP_203135.1	RP	GRAMD1B	ATGAAGACTTCAGAAAGCTCTTTAAGCAGCTTCCAGACACGGAGCGCCTCATTGTTGATTACTCATGTGCACTCCAAAGAGACATTCTCCTTCAGGGCCGACTCTACCTCTCTGAAAATTGGATCTGCTTCTACAGCAACATCTTCCGCTGGGAAACTCTGCTGA	CDS
IP_203447.1	RP	FEZ1	ATGAAGAGTTTGAGGACCTTCGACCCTCCTGCTCGGAGGACCCGGAGGAGAAGCCCCAGTGTTTCTATGGTTCATCTCCCCACCATCTCGAGGACCCCTCCCTCTCCGAGCTTGAGAATTTTTCTTCCGAAATAA	CDS
IP_203456.1	RP	EI24	ATGGAGATGTTTGGTCGTGGCTGGAATTCTTCCTCACGTCAATTTTCAGTGCTCTTTGGGTGCTCCCCTTGTTTGTGCTTAGCAAAGTGGTGA	CDS
IP_203468.1	RP	STT3A	ATGCTAAGAACAACATCCCCATCATTGCTTCTGTGTCTGAGCATCAGCCCACAACCTGGTCCTCATACTATTTTGACCTGCAGCTCCTCGTCTTCATGTTTCCAGTTGGCCTCTATTACTGCTTTAGCAACCTGTCTGATGCCCGGATTTTTATCATCATGTATGGTGTGA	CDS
IP_203469.1	RP	STT3A	ATGTCAGCTATGTGCTGGTCATTTTTGGAGGCCTCACTGGGTATTCCTCTGATGATATCAACAAGTTTCTTTGGATGGTCCGGATTGGAGGGAGCACAGATACAGGCAAACATATCAAGGAGAATGACTATTATACTCCAACTGGGGAGTTCCGTGTGGACCGTGAAGGTTCTCCAGTGCTGCTCAACTGCCTCATGTACAAGATGTGTTACTATCGCTTTGGACAGGTTTACACAGAAGCCAAGCGTCCTCCAGGCTTTGACCGTGTCCGAAATGCTGAGATTGGGAATAAAGACTTTGAGCTTGATGTCCTGGAGGAAGCATATACCACAGAACATTGGCTGGTCAGGATATACAAGGTAA	CDS
IP_203470.1	RP	STT3A	ATGGCAGTAGGATCATATTTGATGACTTCCGAGAAGCATATTATTGGCTTCGTCATAATACTCCAGAGGATGCGAAGGTCATGTCCTGGTGGGATTATGGCTATCAGATTACAGCTATGGCAAACCGAACAATTTTAG	CDS
IP_203514.1	RP	PUS3	ATGACTGTAAGTTTGAAAATGTCAAGTGGATCTATGACCAGGAGGCTCAGGAGTTCAATATTACCCACCTACAACAACTGTGGGCTAATCATGCTGTCAAAACTCACATGTTGTATAGTATGCTACAAGGACTGGACACTGTTCCAGTACCCTGTGGAATAG	CDS
IP_203632.1	MS and RP	ETS1	ATGGAGTCAACCCAGCCTATCCAGAATCCCGCTATACCTCGGATTACTTCATTAGCTATGGTATTGAGCATGCCCAGTGTGTTCCACCATCGGAGTTCTCAGAGCCCAGCTTCATCACAGAGTCCTATCAGACGCTCCATCCCATCAGCTCGGAAGAGCTCCTCTCCCTCAAGTATGAGAATGACTACCCCTCGGTCATTCTCCGAGACCCTCTCCAGACAGACACCTTGCAGAATGACTACTTTGCTATCAAACAAGAAGTCGTCACCCCAGACAACATGTGCATGGGGAGGACCAGTCGTGGTAAACTCGGGGGCCAGGACTCTTTTGAAAGCATAG	CDS
IP_203642.1	RP	FLI1	ATGCTTACAAATTTGACTTCCACGGCATTGCCCAGGCTCTGCAGCCACATCCGACCGAGTCGTCCATGTACAAGTACCCTTCTGACATCTCCTACATGCCTTCCTACCATGCCCACCAGCAGAAGGTGA	CDS
IP_203783.1	RP	PRDM10	ATGAAAGCTCGCATGTGTGGCCGACATCTGCAGAGCATGAACAGAATGCCGCACAGGTGCACTTTGTTCCGGACACAGGAACAGTGGCTCAGATTGTCTATACCGATGACCAGGTTCGCCCCCCACAGCAGGTGGTGTACACGGCAGATGGTGCCTCCTACACATCAGTGGATGGTCCAGAGCACACGCTGGTGTACATCCACCCGGTGGAAGCTGCACAGACTCTGTTTACAGACCCCGGCCAGGTAG	CDS
IP_203797.1	RP	APLP2	ATGATGTTGATGTGTATTTCGAGACCTCTGCAGATGATAATGAGCATGCTCGCTTCCAGAAGGCTAAGGAGCAGCTGGAGATTCGGCACCGCAACCGAATGGACAGGGTAA	CDS
IP_203798.1	RP	APLP2	ATGGCACTGAATATGTGTGCTGCCCTCAGACAAAGATTATTGGATCTGTGTCAAAAGAAGAGGAAGAGGAAGATGAAGAGGAAGAGGAAGAGGAAGATGAAGAGGAAGACTATGATGTTTATAAAAGTGAATTTCCTACTGAAGCAGATCTGGAAGACTTCACAGAAGCAGCTGTGGATGAGGATGATGAGGATGAGGAAGAAGGGGAGGAAGTGGTGGAGGACCGAGATTACTACTATGACACCTTCAAAGGAGATGACTACAATGAGGAGAATCCTACTGAACCCGGCAGCGACGGCACCATGTCAGACAAGGAAATTACTCATGATGTCAAAGCTGTCTGCTCCCAGGAGGCGATGA	CDS
IP_205426.1	MS	IQSEC3	ATGAGACCGTGCTGCACCAGTTCTGCTGCCCAGCCGCCGACGCCTGCTCCGACCTGGCCTCCCAAAGTGATGGCTCCTGCACCCAGGCCGGTGGGGGCATGGAGGACTCCGTGGTGGCAGCGGCGGCGGTGGCAGCCGGCAGACCCAGTGCCCATGCCCCGAAGGCTCAAGCCCAGGAGCTGCAGGAGGAGGAGGAGCGGCCGGGGGCAGGGGCTGCCTCCCCAAGGGCTGGCCCCCAGCACAAGGCCTCCCCCGGCCGGCAGCAGCCTGCCCTGGCGACGGCGCTGTGCCCCCACGCCCCTGCCGCCTCCGATTACGAACTCTCCCTTGACCTAA	CDS
IP_205489.1	RP	KDM5A	ATGATGAGCGGCAGTGTTCAGCATGCAGAACCACATGTTTTCTCTCTGCTCTCACATGTTCCTGTAATCCTGAGCGGCTTGTATGTCTCTACCATCCAACTGATCTGTGCCCCTGCCCCATGCAGAAGAAATGTCTTAGATATCGCTACCCATTAG	CDS
IP_205531.1	RP	WNK1	ATGATATCGAAGAGCTGGAGACCAAGGCCGTGGGAATGTCTAACGATGGCCGCTTTCTCAAGTTTGACATCGAAATCGGCAGAGGCTCCTTTAAGACGGTCTACAAAGGTCTGGACACTGAAACCACCGTGGAAGTCGCCTGGTGTGAACTGCAGGATCGAAAATTAA	CDS
IP_205534.1	RP	WNK1	ATGAGGAGAAATATGATGAATCCGTTGACGTTTATGCTTTTGGGATGTGCATGCTTGAGATGGCTACATCTGAATATCCTTACTCGGAGTGCCAAAATGCTGCACAGATCTACCGTCGCGTGA	CDS
IP_205626.1	RP	ADIPOR2	ATGAATACAGTGATGAAGCTCCTCAGGAAGATGAGGGCTTTATGGGCATGTCCCCTCTCTTACAAGCCCATCATGCTATGGAAAAAATGGAAGAATTTGTTTGTAAGGTATGGGAAGGTCGGTGGCGAGTGA	CDS
IP_205739.1	RP	FKBP4	ATGACTTTGAACTGGCACGGGCTGATTTCCAGAAGGTCCTGCAGCTCTACCCCAACAACAAAGCCGCCAAGACCCAGCTGGCTGTGTGCCAGCAGCGGATCCGAAGGCAGCTTGCCCGGGAGAAGAAGCTCTATGCCAATATGTTTGAGAGGCTGGCTGAGGAGGAGAACAAGGCCAAGGCAGAGGCTTCCTCAGGAGACCATCCCACTGACACAGAGATGA	CDS
IP_205740.1	RP	FKBP4	ATGGCGGAATCATTCGCAGAATACAGACTCGCGGTGAAGGCTATGCTAAGCCCAATGAGGGTGCTATCGTGGAGGTTGCACTGGAAGGGTACTACAAGGACAAGCTCTTTGACCAGCGGGAGCTCCGCTTTGAGATTGGCGAGGGGGAGAACCTGGATCTGCCTTATGGTCTGGAGAGGGCCATTCAGCGCATGGAGAAAGGAGAACATTCCATCGTGTACCTCAAGCCCAGCTATGCTTTTGGCAGTGTTGGGAAGGAAAAGTTCCAAATCCCACCAAATGCTGAGCTGA	CDS
IP_205741.1	RP	FKBP4	ATGGCACAAAGTTTGACTCCAGTCTGGATCGCAAGGACAAATTCTCCTTTGACCTGGGAAAAGGGGAGGTCATCAAGGCTTGGGACATTGCCATAG	CDS
IP_205790.1	RP	FOXM1	ATGCCCCAAGTGAAACATCAGAGGAGGAACCTAAGAGATCCCCTGCCCAACAGGAGTCTAATCAAGCAGAGGCCTCCAAGGAAGTGGCAGAGTCCAACTCTTGCAAGTTTCCAGCTGGGATCAAGATTATTAACCACCCCACCATGCCCAACACGCAAGTAG	CDS
IP_205885.1	RP	PARP11	ATGAAGTGGATGACATGGACACGTCAGATACCCAGTGGGGCTGGTTTTACTTGGCAGAATGTGGGAAGTGGCACATGTTTCAGCCGGATACCAACAGTCAGTGTTCAGTTAGCAGTGAAGATATCGAAAAAAGCTTCAAAACAAACCCTTGTGGCTCCATTTCTTTTACTACTTCCAAATTCAGCTACAAGATAG	CDS
IP_206000.1	RP	NDUFA9	ATGCCCTCATGCCTCATGGGAAAGGTGGACGTTCCTCAGTCAGTGGGATTGTGGCCACTGTGTTTGGAGCAACAGGATTCCTGGGGCGATATGTTGTCAACCACCTTGGACGCATGGGGTCACAGGTAA	CDS
IP_206189.1	RP	GAPDH	ATGCCATCACTGCCACCCAGAAGACTGTGGATGGCCCCTCCGGGAAACTGTGGCGTGATGGCCGCGGGGCTCTCCAGAACATCATCCCTGCCTCTACTGGCGCTGCCAAGGCTGTGGGCAAGGTCATCCCTGAGCTGA	CDS
IP_206190.1	MS and RP	GAPDH	ATGACCCCTTCATTGACCTCAACTACATGGTTTACATGTTCCAATATGATTCCACCCATGGCAAATTCCATGGCACCGTCAAGGCTGAGAACGGGAAGCTTGTCATCAATGGAAATCCCATCACCATCTTCCAGGAGCGAGATCCCTCCAAAATCAAGTGGGGCGATGCTGGCGCTGAGTACGTCGTGGAGTCCACTGGCGTCTTCACCACCATGGAGAAGGCTGGGGCTCATTTGCAGGGGGGAGCCAAAAGGGTCATCATCTCTGCCCCCTCTGCTGATGCCCCCATGTTCGTCATGGGTGTGA	CDS
IP_206214.1	RP	NOP2	ATGACGCCAATGCTGAGCGGCTCAAGAGTGTTGTGGGCAACTTGCATCGGCTGGGAGTCACCAACACCATTATCAGCCACTATGATGGGCGCCAGTTCCCCAAGGTGGTGGGGGGCTTTGACCGAGTACTGCTGGATGCTCCCTGCAGTGGCACTGGGGTCATCTCCAAGGATCCAGCCGTGA	CDS
IP_206218.1	RP	NOP2	ATGATTCTTCTGTGCCCATTGGTGCTACCCCCGAGTACCTGGCTGGGCACTACATGCTGCAGGGAGCCTCCAGCATGTTGCCCGTCATGGCCTTGGCACCCCAGGAACATGAGCGGATCCTGGACATGTGTTGTGCCCCTGGAGGAAAGACCAGCTACATGGCCCAGCTGA	CDS
IP_206227.1	RP	CHD4	ATGATATCCTCAAATTTGGCACTGAGGAACTATTCAAGGATGAAGCCACTGATGGAGGAGGAGACAACAAAGAGGGAGAAGATAGCAGTGTTATCCACTACGATGATAAGGCCATTGAACGGCTGCTAG	CDS
IP_206228.1	RP	CHD4	ATGATATGGATGAGCCACCTTCTGGGGACTTTGGTGGTGATGAAGAGAAAAGCCGAAAGCGAAAGAACAAGGACCCTAAATTTGCAGAGATGGAGGAACGCTTCTATCGCTATGGGATAA	CDS
IP_206230.1	RP	CHD4	ATGATGAGAAACAGAAGAAAAATATTAAACAACGTTTCATGTTTAACATTGCAGATGGTGGTTTTACTGAGTTGCACTCCCTTTGGCAGAATGAAGAGCGGGCAGCCACAGTTACCAAGAAGACTTATGAGATCTGGCATCGACGGCATGACTACTGGCTGCTAG	CDS
IP_206234.1	RP	CHD4	ATGATGGCTCCCAGGAGGACCGAGATTGGCAGGACGACCAGTCCGACAACCAGTCCGATTACTCAGTGGCTTCAGAGGAAGGTGATGAAGACTTTGATGAACGTTCAGAAGCTCCCCGTAGGCCCAGTCGTAAGGGCCTGCGGAATGATAAAGATAAGCCATTGCCTCCTCTGTTGGCCCGTGTTGGTGGGAATATTGAAGTACTTGGTTTTAATGCTCGTCAGCGAAAAGCCTTTCTTAATGCAATTATGCGATATGGTATGCCACCTCAGGATGCTTTTACTACCCAGTGGCTTGTAA	CDS
IP_206235.1	RP	CHD4	ATGAAGGTTATAAATACGAACGCATCGATGGTGGAATCACTGGGAACATGCGGCAAGAGGCCATTGACCGCTTCAATGCACCGGGTGCTCAGCAGTTCTGCTTCTTGCTTTCCACTCGAGCTGGGGGCCTTGGAATCAATCTGGCCACTGCTGACACAGTTATTATCTATGACTCTGACTGGAACCCCCATAATGACATTCAGGCCTTTAGCAGAGCTCACCGGATTGGGCAAAATAAAAAGGTAA	CDS
IP_206304.1	RP	MLF2	ATGGCAACATGCCAGGGACCAGGCCTGCCAGCCGCCGGATGCAGCAGGCTGGAGCTGTCTCCCCCTTTGGGATGCTGGGAATGTCGGGTGGTTTCATGGACATGTTTGGGATGA	CDS
IP_206305.1	RP	MLF2	ATGGTGCCCCCAAGGTCTACCAAGAGACATCAGAGATGCGCTCGGCACCAGGCGGGATCCGGGAGACACGGAGGACTGTTCGGGATTCAGACAGTGGACTGGAGCAGATGTCCATTGGGCATCACATCCGGGACAGGGCTCACATCCTCCAGCGCTCCCGAAACCATCGCACGGGGGACCAGGAGGAGCGGCAGGACTATATCAACCTGGATGAGAGTGAGGCCGCAGCGTTTGATGACGAGTGGCGGCGGGAGACCTCCCGATTCCGGCAGCAGCGTCCCCTGGAGTTTCGGCGGCTTGAGTCCTCAGGGGCTGGGGGACGAAGGGCGGAGGGGCCTCCCCGCCTGGCCATCCAGGGACCTGAGGACTCCCCTTCCCGACAGTCCCGCCGCTATGACT…	CDS
IP_206408.1	RP	PTPN6	ATGAGAACGCTAAGACCTACATCGCCAGCCAGGGTTGTCTGGAGGCCACGGTCAATGACTTCTGGCAGATGGCGTGGCAGGAGAACAGCCGTGTCATCGTCATGA	CDS
IP_207034.1	RP	YBX3	ATGGAGTCCCAGAGGGAGCACAACTTCAGGGACCGGTTCATCGAAATCCAACTTACCGCCCAAGGTACCGTAGCAGGGGACCTCCTCGCCCACGACCTGCCCCAGCAGTTGGAGAGGCTGAAGATAAAGAAAATCAGCAAGCCACCAGTGGTCCAAACCAGCCGTCTGTTCGCCGTGGATACCGGCGTCCCTACAATTACCGGCGTCGCCCGCGTCCTCCTAACGCTCCTTCACAAGATGGCAAAGAGGCCAAGGCAGGTGAAGCACCAACTGAGAACCCTGCTCCACCCACCCAGCAGAGCAGTGCTGAGTAACACCAGGCTCCTCAGGCACCTTCACCATCGGCAGGTGACCTAA	CDS
IP_207036.1	RP	YBX3	ATGGAGTTCCTGTGGAAGGGAGTCGTTACGCTGCAGATCGGCGCCGTTACAGACGTGGCTACTATGGAAGGCGCCGTGGCCCTCCCCGGAATTACGCTGGGGAGGAGGAGGAGGAAGGGAGCGGCAGCAGTGAAGGATTTGACCCCCCTGCCACTGATAGGCAGTTCTCTGGGGCCCGGAATCAGCTGCGCCGCCCCCAGTATCGCCCTCAGTACCGGCAGCGGCGGTTCCCGCCTTACCACGTGGGACAGACCTTTGACCGTCGCTCACGGGTCTTACCCCATCCCAACAGAATACAGGCTGGTGAGATTGGAGAGATGA	CDS
IP_207139.1	RP	LRP6	ATGGTACTACAAGGTGTTCTTGCCCCATGCACCTGGTTCTACTTCAAGATGAGCTATCATGTGGAGAACCTCCAACATGTTCTCCTCAGCAGTTTACTTGTTTCACGGGGGAAATTGACTGTATCCCTGTGGCTTGGCGGTGCGATGGGTTTACTGAATGTGAAGACCACAGTGATGAACTCAATTGTCCTGTATGCTCAGAGTCCCAGTTCCAGTGTGCCAGTGGGCAGTGTATTGATGGTGCCCTCCGATGCAATGGAGATGCAAACTGCCAGGACAAATCAGATGAGAAGAACTGTGAAGTGCTTTGTTTAA	CDS
IP_207221.1	RP	DDX47	ATGTGTTGTGTGAAGCTTGTGACCAGTTGGGATGGACAAAACCCACCAAGATCCAGATTGAAGCTATTCCTTTGGCCTTACAAGGTCGTGATATCATTGGGCTTGCAGAAACTGGCTCTGGAAAGACAGGCGCCTTTGCTTTGCCCATTCTAA	CDS
IP_207295.1	MS	GRIN2B	ATGGCATTGCCATCCAAAAAGATTCTGGGTGGAAGCGCCAGGTGGACCTTGCTATCCTGCAGCTCTTTGGAGATGGGGAGATGGAAGAACTGGAAGCTCTCTGGCTCACTGGCATTTGTCACAATGAGAAGAATGAGGTCATGA	CDS
IP_207358.1	RP	WBP11	ATGAAGACATGTTATATAGTCCTGAACTTGCCCAGCGAGGTCATGATGATGATGTTTCTAGCACCAGTGAAGATGATGGCTATCCTGAGGACATGGATCAAGATAAGCATGATGACAGTACTGATGACAGTGACACCGACAAATCAGATGGAGAAAGTGACGGGGATGAATTTGTGCACCGTGATAATGGTGAGAGAGACAACAATGAAGAAAAGAAGTCAGGTCTGA	CDS
IP_207431.1	RP	EPS8	ATGGCTACGGATCATCACCTACCTTTTCCCAGACGGACAGAGAACATGGTTCAAAAACAAGTGCAAAGGCCCTTTATGAACAAAGGAAGAATTATGCACGGGACAGTGTCAGCAGTGTGTCAGATATATCTCAATACCGTGTTGAACACTTGA	CDS
IP_207573.1	RP	AEBP2	ATGGACAAGGAAGCACTACTTCTTCAAGCAAAAATATTGCCTATAATTGTTGTTGGGACCAGTGCCAGGCTTGCTTCAACTCTAGCCCAGATCTGGCAGATCACATCCGTTCCATACATGTAG	CDS
IP_207695.1	RP	RECQL	ATGGGAGATACAAAGGGCAATCAGGAATCATATATTGTTTTTCTCAGAAAGACTCTGAACAAGTTACGGTTAGTTTGCAGAATCTGGGAATTCATGCAGGTGCTTACCATGCCAATTTGGAGCCAGAAGATAAGACCACAGTTCATAGAAAATGGTCAGCCAATGAAATTCAGGTAG	CDS
IP_207699.1	RP	RECQL	ATGTTACCAGTTACCAGCATTATGTTCAGATGGTTTTACACTCGTCATTTGCCCATTGATCTCTCTTATGGAAGACCAATTAATGGTTTTAAAACAATTAGGAATTTCAGCAACCATGTTAAATGCTTCTAG	CDS
IP_207743.1	MS	ABCC9	ATGGTGTACTACAAAATTCCTGCTTTGTGGATGCCCTCAACCTGGTCCCTCATGTCTTTCTGTTGTTTATCACTTTTCCAATATTGTTTATTGGGTGGGGGAGCCAAAGCTCAAAAGTACAAATTCACCACAACACATGGCTTCATTTTCCGGGACATAACCTGA	CDS
IP_208001.1	RP	ITPR2	ATGACAGATGTGTGGTGCACCCAGAGGCCGGGGACCTTGCCAACCCTCCCAAGAAGTTCAGAGACTGCCTTTTCAAGGTGTGCCCTATGA	CDS
IP_208005.1	RP	ITPR2	ATGAAATTGCAGCTCAGGCAGAAACTATGTTTGCGGGAAGAAAAGAAAAAAATCCAGTTCAACTTGACGATGAAGGAGGCAGGACGTTTTTACGGGTCCTCATTCATCTGA	CDS
IP_208008.1	RP	ITPR2	ATGAATATGAGAAAAAACAGCACATTTTCCTTCGTACGACCTTGCGCCAATCAGCTACTTCTGCTACTAGTTCTAAAGCACTCTGGGAAATAG	CDS
IP_208009.1	RP	ITPR2	ATGCCTATAACCAAGGATTGGAATGTGACCATGGGGATGATGAGGGTGGAGATGATGGTGTTTCTCCAAAAGATGTTGGACACAATATCTATATTCTGGCCCATCAGTTGGCCCGCCACAATAAACTGTTGCAGCAGATGCTCAAACCAGGATCGGATCCAGATGAAGGAGATGAAGCCTTAA	CDS
IP_208011.1	RP	ITPR2	ATGGACACCTATCAGGAGCCTACTCCAAAACTGCACAGGTGGGAGGAAGCTTTTCTGGACAAGATTCAGATAAGATGGGGATATCAATGTCAGACATTCAGTGTCTGCTGGATAAAGAAGGTGCATCAGAACTTGTCATCGATGTTATAG	CDS
IP_208068.1	RP	STK38L	ATGATACTTCAAATTTTGATGACTTCCCTGAATCTGATATTTTACAACCAGTGCCAAATACCACAGAACCGGACTACAAATCCAAAGACTGGGTTTTTCTCAATTATACCTATAAAAGGTTTGAAGGGTTGA	CDS
IP_208182.1	RP	ERGIC2	ATGAAGGAAGAGGAAGGTTTTCCTGAAGATGAGGCGACTGAATCGGAAAAAAACTTTAAGTTTGGTAAAAGAGTTGGATGCCTTTCCGAAGGTTCCTGA	5'UTR
IP_208233.1	RP	IPO8	ATGCAGGAGAAGATGCAGAGTGTCATGCAGCTAAACTTCTGGAAGTCATCATTCTTCAGTGCAAAGGAAGGGGAATTGATCAGTGCATTCCACTCTTCGTTCAACTTGTTTTGGAGAGATTAA	CDS
IP_208775.1	MS	ADAMTS20	ATGAAAGAAGACATTCCAGGAAAAAACGTCTTATATCATATCCAAGATACATTGAAATTATGGTTACAGCTGATGCTAAAGTGGTTTCTGCTCATGGATCGAATTTGCAAAACTATATACTGA	CDS
IP_208880.1	RP	ARID2	ATGATAATGAAGTTCGTGACCTCATTTCTGACAGAAACAAGTCTCATGAAGGTACATCAGGAGAATGGATTTGGGAGTCTTTATTTCATCCACCTCGAAAGCTGGGCATTAACGATATTGAAGGACAGCGGGTACTTCAGATTGCAGTGA	CDS
IP_208885.1	RP	ARID2	ATGATGATGAGGTACCACCAGGCAATCCAAAGCCACAGCTTCCTATTGGTGCAATTCCATCTTCCTACAATTACCAGCAACACAGTGTGTCGGATTATCTGCGTCAAAGTTATGGGCTGTCCATGGACTTTAATTCGCCAAATGATTATAATAAATTGGTGCTTTCACTGTTATCTGGACTCCCAAATGAAGTGGACTTTGCTATTAACGTATGCACTCTCCTATCAAATGAAAGCAAGCACGTCATGCAACTTGAAAAAGATCCTAAAATCATCACTTTACTACTTGCTAATGCCGGGGTGTTTGACGACACTTTAG	CDS
IP_208901.1	RP	SCAF11	ATGAAAATTCAGGAAATTCTTGGAATAAAAACTTTGGTTCTGGTTGGGTATCTAACCGTGGTAGAGGCAGAGGCAACCGTGGCAGAGGCACTTACAGAAGTAGTTTTGCCTATAAAGATCAGAATGAAAATCGGTGGCAAAATCGAAAACCCCTCTCAGGGAATTCAAACAGTTCAGGGAGTGAATCTTTCAAGTTTGTGGAACAGCAATCCTATAAGCGAAAAAGTGAACAGGAGTTCTCATTTGATACACCAGCAGATAGATCTGGATGGACATCTGCATCCAGCTGGGCCGTGA	CDS
IP_208902.1	RP	SCAF11	ATGGGCAGAGGAGAGAGAGAGAAAGGAGAACCAGAAAGTGGTCTAGGTCCAGATCTCATTCTAGGTCCCCCTCAAGATGTAGAACAAAAAGTAAGAGTTCATCATTTGGTAGAATTGACAGAGATAGTTACTCTCCCCGGTGGAAGGGAAGATGGGCAAATGATGGTTGGAGATGTCCACGAGGAAATGATCGGTACAGAAAGAATGACCCAGAGAAACAGAATGAAAATACAAGAAAAGAAAAAAATGACATCCATCTAG	CDS
IP_208934.1	RP	SLC38A1	ATGCTGACACGTGTACGCCAAAATATGTTACCTTCAATTCAAAGACCGTGTATGCTTTACCCACCATTGCATTTGCATTTGTTTGCCACCCGTCAGTCCTGCCAATTTACAGTGAGCTTAAAGACCGATCACAGAAAAAAATGCAGATGGTTTCAAACATCTCCTTTTTCGCCATGTTTGTTATGTACTTCTTGA	CDS
IP_208994.1	RP	RPAP3	ATGATTATGAGGCATGGGCAAAACTTGATGTGGACCGTATCCTTGATGAGCTTGACAAAGACGATAGTACCCATGAGTCTCTGTCTCAAGAATCAGAGTCGGAAGAAGATGGGATTCATGTAG	5'UTR
IP_209081.1	RP	TMEM106C	ATGACAGGGACGGTTTGCTGGCTGAACGAGAGCAGGAAGAAGCCATTGCTCAGTTCCCATATGTGGAATTCACCGGGAGAGATAGCATCACCTGTCTCACGTGCCAGGGGACAGGCTACATTCCAACAGAGCAAGTAA	CDS
IP_209092.1	MS	COL2A1	ATGGCCCCCCTGGCAGAGATGGCGCTGCTGGAGTCAAGGGTGATCGTGGTGAGACTGGTGCTGTGGGAGCTCCTGGAGCCCCTGGGCCCCCTGGCTCCCCTGGCCCCGCTGGTCCAACTGGCAAGCAAGGAGACAGAGGAGAAGCTGGTGCACAAGGCCCCATGGGACCCTCAGGACCAGCTGGAGCCCGGGGAATCCAGGGTCCTCAAGGCCCCAGAGGTGACAAAGGAGAGGCTGGAGAGCCTGGCGAGAGAGGCCTGA	CDS
IP_209127.1	RP	PFKM	ATGACGACTGGGAGGAACACCTTTGTCGCCGACTCAGCGAGACAAGGACCCGTGGTTCTCGTCTCAACATCATCATTGTGGCTGAGGGTGCAATTGACAAGAATGGAAAACCAATCACCTCAGAAGACATCAAGAATCTGGTGGTTAAGCGTCTGGGATATGACACCCGGGTTACTGTCTTGGGGCATGTGCAGAGGGGTGGGACGCCATCAGCCTTTGACAGAATTCTGGGCAGCAGGATGGGTGTGGAAGCAGTGA	CDS
IP_209206.1	MS	KANSL2	ATGAAGACAGCTGGAGTGATGGGGAGCAGGAACCCATTACTGTGGATCAGACATGGAGAGGTGACCCTGACAGTGAAGCTGATAGCATAG	CDS
IP_209207.1	MS and RP	KANSL2	ATGCACCCTTCAAGCAGTGTAGTTATATATCGACGAAGAATGGAAAAAGATGTCCCAATGCTGCCCCAAAGCCAGAGAAGAAAGATGGGGTGTCCTTCTGTGCTGAACATGTCCGTAGGAATGCCCTGGCACTTCATGCTCAAATGA	CDS
IP_209260.1	RP	CACNB3	ATGTCAGCTACTGTGGCGTACTGGATGAGGAGTGCCCAGTCCAGGGCTCTGGAGTCAACTTTGAGGCCAAAGATTTTCTGCACATTAAAGAGAAGTACAGCAATGACTGGTGGATCGGGCGGCTAG	CDS
IP_209287.1	RP	DDX23	ATGGAAATGAGGATGAGGAAGGGCGGCAGAAGATCCGGGAAGAGAAGGATAAGAGCAAGGAACTGCATGCCATTAAGGAGCGTTACCTGGGTGGCATCAAAAAGCGGCGCCGAACGAGACATCTCAATGACCGGAAATTTGTTTTTGAGTGGGATGCATCTGAGGACACATCCATTGACTACAACCCCCTGTACAAAGAACGGCACCAGGTGCAGTTGTTAG	CDS
IP_209419.1	RP	LMBR1L	ATGCTGAGCAGAGTATGGAAGCACCTGACTACGAAGTGCTATCCGTGCGAGAACAGCTATTCCACGAGAGGATCCGCGAGTGTATTATATCAACACTTCTGTTTGCAACACTGTACATCCTCTGCCACATCTTCCTGA	5'UTR
IP_209517.1	RP	MCRS1	ATGAATCTCCTCTCAGCCTTTAAGCTCACCTGGTCAGAATCCTTGGATGAGCCTGTGGGACCGTTCCTCCTAGCCCGGTGGTTTGGAACCAGTGGCTTTGGGACTGTAAGAGGATGGACAAAGATTCTCAGGGGCTGCTAG	5'UTR
IP_209591.1	RP	TMBIM6	ATGAAACTGAACAGAAAAGACTGGGACTTCTTGCTGGATTTGCATTCCTTACAGGAGTTGGCCTGGGCCCTGCCCTGGAGTTTTGTATTGCTGTCAACCCCAGCATCCTTCCCACTGCTTTCATGGGCACGGCAATGA	CDS
IP_209593.1	RP	TMBIM6	ATGCAAGTTTTGCCCTTTGTATGTTTGTGGCGGCTGCAGGGGCCTATGTCCATATGGTCACTCATTTCATTCAGGCTGGCCTGCTGTCTGCCTTGGGCTCCCTGA	CDS
IP_209697.1	RP	SMARCD1	ATGTGGTGGGTAACCCAGAGGAGGAGCGCCGAGCTGAGTTCTACTTCCAGCCCTGGGCTCAGGAGGCTGTGTGCCGATACTTCTACTCCAAGGTGCAGCAGAGACGACAAGAATTAG	CDS
IP_209740.1	RP	LIMA1	ATGCATCTTTACATGGAAGAATCTATTGTAAGCCTCACTTCAATCAACTCTTTAAATCTAAGGGCAACTATGATGAAGGCTTTGGGCACAGACCACACAAGGATCTATGGGCAAGCAAAAATGAAAACGAAGAGATTTTGGAGAGACCAGCCCAGCTTGCAAATGCAAGGGAGACCCCTCACAGCCCAGGGGTAG	CDS
IP_209895.1	RP	TFCP2	ATGTCCTTGCATTGCCCATTTTTAAGCAAGAAGAGTCGAGTTTGCCTCCTGATAATGAGAATAAAATCCTGCCTTTTCAATATGTGCTTTGTGCTGCTACCTCTCCAGCAGTGA	CDS
IP_209900.1	RP	TFCP2	ATGAAAACGGGGAATATACTGAGCACTTACACTCGGCCAGCTGCCAGATCAAAGTTTTCAAGCCCAAAGGTGCAGACAGAAAGCAAAAAACGGATAGGGAAAAAATGGAGAAACGAACACCTCATGAAAAGGAGAAATATCAGCCTTCCTATGAGACAACCATACTCACAGAGTGTTCTCCATGGCCCGAGATCACGTATGTCAATAACTCCCCATCACCTGGCTTCAACAGTTCCCATAGCAGTTTTTCTCTTGGGGAAGGAAATGGTTCACCAAACCACCAGCCAGAGCCACCCCCTCCAGTCACAGATAACCTCTTACCAACAACCACACCTCAGGAAGCTCAGCAGTGGTTGCATCGAAATCGTTTTTCTACATTCACAAGGCTTTTCACAAACT…	CDS
IP_209919.1	RP	DAZAP2	ATGCTCCACCTGCCTACTCAGAGCTCTATCGTCCGAGCTTTGTGCACCCAGGGGCTGCCACAGTCCCCACCATGTCAGCCGCATTTCCTGGAGCCTCTCTGTATCTTCCCATGGCCCAGTCTGTGGCTGTTGGGCCTTTAG	CDS
IP_209953.1	MS	GALNT6	ATGAGAAGCAGAGGCGCAAGGATGAAACCTACCCCATCAAATCCCCGACGTTTGCTGGTGGCCTCTTCTCCATCTCCAAGTCCTACTTTGAGCACATCGGTACCTATGATAATCAGATGGAGATCTGGGGAGGGGAGAACGTGGAAATGTCCTTCCGGGTGTGGCAGTGTGGGGGCCAGCTGGAGATCATCCCCTGCTCTGTCGTAG	CDS
IP_210234.1	MS	KRT71	ATGAGGAGGAAATCAACAAGCGGACAGCAGCAGAGAACGAGTTTGTGCTGCTCAAGAAGGATGTGGATGCTGCTTACGCCAATAAGGTGGAACTGCAGGCCAAGGTGGAATCCATGGACCAGGAGATCAAGTTCTTCAGGTGTCTCTTTGAAGCCGAGATCACTCAGATCCAGTCCCACATCAGTGACATGTCTGTCATCCTGTCCATGGACAACAACCGGAACCTAG	CDS
IP_210340.1	RP	EIF4B	ATGATGACTACAGAGGAGGCGGGGACCGCTATGAAGACCGATATGACAGACGGGATGATCGGTCGTGGAGCTCCAGAGATGATTACTCTCGGGATGATTATAGGCGTGATGATAGAGGTCCCCCCCAAAGACCCAAACTGA	CDS
IP_210341.1	RP	EIF4B	ATGATCGTTCTTTTGGCCGTGATAGAAATCGGGATTCTGACAAAACAGATACAGACTGGAGGGCTCGTCCTGCTACAGACAGCTTTGATGACTACCCACCTAGAAGAGGTGATGATAGCTTTGGAGACAAGTATCGAGATCGTTATGATTCAGACCGGTATCGGGATGGGTATCGGGATGGGTATCGGGATGGCCCACGCCGGGATATGGATCGATATGGTGGCCGGGATCGCTATGATGACCGAGGCAGCAGAGACTATGATAGAGGCTATGATTCCCGGATAG	CDS
IP_210346.1	RP	EIF4B	ATGGGGGTACTGGTGGAGGAAGCACCTATGTTTCCAAACCAGTCAGCTGGGCTGATGAAACGGATGACCTGGAAGGAGATGTTTCGACCACTTGGCACAGTAACGATGACGATGTGTATAGGGCGCCTCCAATTGACCGTTCCATCCTTCCCACTGCTCCACGGGCTGCTCGGGAACCCAATATCGACCGGAGCCGTCTTCCCAAATCGCCACCCTACACTGCTTTTCTAG	CDS
IP_210443.1	RP	ITGB7	ATGCCATTCTGCAGGCTGCACTCTGCCAGGAGCAGATTGGCTGGAGAAATGTGTCCCGGCTGCTGGTGTTCACTTCAGACGACACATTCCATACAGCTGGGGACGGGAAGTTGGGCGGCATTTTCATGCCCAGTGATGGGCACTGCCACTTGGACAGCAATGGCCTCTACAGTCGCAGCACAGAGTTTGACTACCCTTCTGTGGGTCAGGTAG	CDS
IP_210486.1	RP	C12orf10	ATGGCACCTTCCACTGCGACGAGGCACTGGCATGCGCACTGCTTCGCCTCCTGCCGGAGTACCGGGATGCAGAGATTGTGCGGACCCGGGATCCCGAAAAACTCGCTTCCTGTGACATCGTGGTGGACGTGGGGGGCGAGTACGACCCTCGGAGACACCGATATGACCATCACCAGAGGTCTTTCACAGAGACCATGA	CDS
IP_210528.1	MS	SP1	ATGGGGGCAATGGTAATGGTGGTGGTGCCTTTTCACAGGCTCGAAGTAGCAGCACAGGCAGTAGCAGCAGCACTGGAGGAGGAGGGCAGGAGTCCCAGCCATCCCCTTTGGCTCTGCTGGCAGCAACTTGCAGCAGAATTGAGTCACCCAATGAGAACAGCAACAACTCCCAGGGCCCGAGTCAGTCAGGGGGAACAGGTGAGCTTGACCTCACAGCCACACAACTTTCACAGGGTGCCAATGGCTGGCAGATCATCTCTTCCTCCTCTGGGGCTACCCCTACCTCAAAGGAACAGAGTGGCAGCAGTACCAATGGCAGCAATGGCAGTGAGTCTTCCAAGAATCGCACAGTCTCTGGTGGGCAGTATGTTGTGGCTGCCGCTCCCAACTTACAGAACC…	CDS
IP_210577.1	RP	PCBP2	ATGAGATCCGTCAGATGTCTGGGGCGCAGATCAAAATTGCGAACCCAGTGGAAGGATCTACTGATAGGCAGGTTACCATCACTGGATCTGCTGCCAGCATTAGCCTGGCTCAATATCTAA	CDS
IP_210579.1	RP	PCBP2	ATGTCACTCTCACCATCCGGCTACTTATGCATGGAAAGGAAGTTGGCAGTATCATCGGAAAGAAAGGAGAATCAGTTAAGAAGATGCGCGAGGAGAGTGGTGCACGTATCAACATCTCAGAAGGGAATTGTCCTGAGAGAATTATCACTTTGGCTGGACCCACTAATGCCATCTTCAAAGCCTTTGCTATGA	CDS
IP_210767.1	MS and RP	CBX5	ATGACATCAAATCTAAAAAAAAGAGAGAGCAGAGCAATGATATCGCTCGGGGCTTTGAGAGAGGACTGGAACCAGAAAAGATCATTGGGGCAACAGATTCCTGTGGTGATTTAA	CDS
IP_210779.1	RP	HNRNPA1	ATGGGGAACGCTCACGGACTGTGTGGTAATGAGAGATCCAAACACCAAGCGCTCCAGGGGCTTTGGGTTTGTCACATATGCCACTGTGGAGGAGGTGGATGCAGCTATGAATGCAAGGCCACACAAGGTGGATGGAAGAGTTGTGGAACCAAAGAGAGCTGTCTCCAGAGAAGATTCTCAAAGACCAGGTGCCCACTTAACTGTGAAAAAGATATTTGTTGGTGGCATTAA	CDS
IP_210833.1	RP	GTSF1	ATGACAAAAACCATCAAATCAGGGCTTGCAGGTTTCCTTATCATCTTATCAAGTGCAGAAAGAATCATCCTGATGTTGCAAGCAAATTGGCTACTTGTCCCTTCAATGCTCGCCACCAGGTTCCTCGAGCTGAAATTAGTCATCATATCTCAAGCTGTGATGACAGAAGTTGTATTGAGCAAGATGTTGTCAACCAAACCAGGAGCCTTAGACAAGAGACTCTGGCTGAGAGCACTTGGCAGTGCCCTCCTTGCGATGAAGACTGGGATAAAGATTTGTGGGAGCAGACCAGCACCCCATTTGTCTGGGGCACAACTCACTACTCTGACAACAACAGCCCTGCGAGCAACATAG	CDS
IP_210839.1	RP	NCKAP1L	ATGAGATGTGCCCAGAGGAGTACCCCCACCTCAAGAACCATGGTCTTCACCACTGCAACTCCTTCCTGGAAGAGTTGGCCAAGCAGACCAGCAATTGCGTCCTGGAGATCTGTGCTGAGCAGCGAAACCTGA	CDS
IP_210840.1	RP	NCKAP1L	ATGTCATGGAATTTCGGGATCATGTATATGAACTTCTCAACACCATTGATGCCTGCCAGTGCCATTTTGATATCAATCTCAACTTTGATTTCACTCGGAGTTACCTGGACTTGA	CDS
IP_210846.1	RP	NCKAP1L	ATGAACCGGGACTACTGGGTCCTAAGGCTCTTTTTGCTTTCATGGCCCTGTCCTTCATTCGTGATGAGGTCACCTGGCTGGTTCGCCACACAGAGAATGTCACCAAGACAAAGACACCTGAGGACTATGCTGACTCGAGCATTGCAGAGCTACTTTTCTTGTTGGAGGGGATTAGGTCTCTGGTCCGAAGACACATCAAAGTGA	CDS
IP_210893.1	RP	TESPA1	ATGCAGAAGATGTCCTCTTCAGTCTGGGCTTTGGCCAAGAGGATCACAAAGACACTTCTCGGATACCCGCCCGATTTTTCACCACCCCCTCTCAGGCCAAGGGCATTGATTTCCAGCTCTTCCTGA	CDS
IP_210964.1	RP	BLOC1S1	ATGTGGAGAACTGGGCTCGGAGCATCGAGCTGGACATGCGCACCATTGCCACTGCACTGGAATATGTCTACAAAGGGCAGCTGCAGTCTGCCCCTTCCTAGCCCCTGTTCCCTCCCCCAACCCTATCCCTCCTACCTCACCCGCAGGGGGAAGGAGGGAGGCTGA	CDS
IP_210965.1	MS	RDH5	ATGCCAAGCTGCTCTGGCTGCCTGCCTCCTACCTGCCAGCCAGCCTGGTGGATGCTGTGCTCACCTGGGTCCTTCCCAAGCCTGCCCAAGCAGTCTACTGAATCCAGCCTTCCAGCAAGAGATTGTTTTTCAAGGACAAGGACTTTGATTTATTTCTGCCCCCACCCTGGTACTGCCTGGTGCCTGCCACAAAATAAGCACTAA	CDS
IP_211060.1	RP	CDK2	ATGAGGTGGTGTGGCCAGGAGTTACTTCTATGCCTGATTACAAGCCAAGTTTCCCCAAGTGGGCCCGGCAAGATTTTAGTAAAGTTGTACCTCCCCTGGATGAAGATGGACGGAGCTTGTTATCGCAAATGCTGCACTACGACCCTAACAAGCGGATTTCGGCCAAGGCAGCCCTGGCTCACCCTTTCTTCCAGGATGTGA	CDS
IP_211067.1	RP	RAB5B	ATGGGCAACCCCAGGCCAGCAAAATTTGCCAGTTCAAATTGGTCCTGCTGGGAGAATCTGCAGTGGGAAAGTCAAGCCTGGTATTACGTTTTGTCAAAGGGCAGTTCCATGAGTACCAGGAGAGCACCATTGGAGCGGCCTTCCTCACCCAGTCCGTTTGTCTAG	CDS
IP_211128.1	RP	PA2G4	ATGAGAAGAAGGCTCGGATGGGTGTGGTGGAGTGCGCCAAACATGAACTGCTGCAACCATTTAATGTTCTCTATGAGAAGGAGGGTGAATTTGTTGCCCAGTTTAAATTTACAGTTCTGCTCATGCCCAATGGCCCCATGCGGATAA	CDS
IP_211150.1	RP	ESYT1	ATGGCTGTCACTTTTGTCAGATGCAGAGAAACTGGAGCAGGTTCTACAGTGGAATTGGGGAGTCTCCTCTCGACCAGATCCCCCGTCAGCTGCCATCTTAGTTGTCTACCTGGATCGGGCCCAGGATCTTCCTCTGAAGAAGGGGAACAAGGAACCCAACCCTATGGTACAACTGTCAATTCAGGATGTGACTCAGGAGAGCAAGGCTGTCTACAGTACCAACTGCCCAGTGTGGGAGGAAGCGTTCCGGTTCTTCCTACAAGACCCTCAAAGCCAGGAGCTCGATGTGCAAGTGAAGGATGA	CDS
IP_211233.1	MS	ANKRD52	ATGTGGAGGAAGTGCGTTCCCTACTCTCGCAGAAGGAGAACATCAATGTGCTGGACCAAGAGAGGCGAACTCCATTGCATGCTGCTGCCTACGTAG	CDS
IP_211304.1	RP	TIMELESS	ATGAGGATGAGACACGAGATGTGCGGCAGCAGCTGGGGGCAGCCCAGATCCTACAGAGCGACCTTCTGCCCATCCTCACCCAGCACCACCAGGACAAGCCTCTCTTTGATGCTGTTATCAGACTGA	CDS
IP_211308.1	MS	TIMELESS	ATGTCCCAGCTGACCTTGATCAGGAGAAGAAGATTGATGATGACGCCAGTGCCCATGACCAGCTCCTCTGGGCGATTCACCTCAGCGGCCTGGATGACCTGCTCCTCTTTCTGGCCAGCTCGTCTGCTGAGGAGCAATGGAGCCTACATGTGCTAG	CDS
IP_211327.1	RP	SPRYD4	ATGTGGACATGTCCCGGGATAGCTGCATTGGTGTTGATGATCGTTCCTGGGTGTTCACCTATGCCCAGCGCAAGTGGTACACCATGTTGGCCAACGAGAAAGCCCCAGTTGAGGGTATTGGGCAGCCAGAGAAGGTGGGGCTGTTGCTGGAGTATGAGGCCCAGAAGCTGA	CDS
IP_211426.1	RP	ATP5B	ATGGTACAGAAGGCTTGGTTAGAGGCCAGAAAGTACTGGATTCTGGTGCACCAATCAAAATTCCTGTTGGTCCTGAGACTTTGGGCAGAATCATGA	CDS
IP_211429.1	RP	ATP5B	ATGCGGCGCAAACATCTCCTTCGCCAAAAGCAGGCGCCGCCACCGGGCGCATCGTGGCGGTCATTGGCGCAGTGGTGGACGTCCAGTTTGATGAGGGACTACCACCAATTCTAA	CDS
IP_211438.1	RP	PTGES3	ATGAAATTGATCTTTTTCACTGTATTGATCCAAATGATTCCAAGCATAAAAGAACGGACAGATCAATTTTATGTTGTTTACGAAAAGGAGAATCTGGCCAGTCATGGCCAAGGTTAA	CDS
IP_211548.1	MS	STAT6	ATGGCAACCAAGACAACAATGCCAAAGCCACTATCCTGTGGGACAATGCCTTCTCTGAGATGGACCGCGTGCCCTTTGTGGTGGCTGAGCGGGTGCCCTGGGAGAAGATGTGTGAAACTCTGA	CDS
IP_211718.1	RP	MARS	ATGTGCTCATCACCAGTGCCCTCCCTTACGTCAACAATGTCCCCCACCTTGGGAACATCATTGGTTGTGTGCTCAGTGCCGATGTCTTTGCCAGGTACTCTCGCCTCCGCCAGTGGAACACCCTCTATCTGTGTGGGACAGATGAGTATGGTACAGCAACAGAGACCAAGGCTCTGGAGGAGGGACTAA	CDS
IP_211721.1	RP	MARS	ATGGGAAGCGACAGAGCTGCAGCCAGCTTTGTCTGCTGCCCTGTACTATTTAGTGGTCCAAGGCAAGAAGGGGGAAGATGTTCTTGGTTCAGTGCGGAGAGCCCTGACTCACATTGA	CDS
IP_211724.1	RP	DDIT3	ATGTTAAAGATGAGCGGGTGGCAGCGACAGAGCCAAAATCAGAGCTGGAACCTGAGGAGAGAGTGTTCAAGAAGGAAGTGTATCTTCATACATCACCACACCTGA	5'UTR
IP_211746.1	RP	DCTN2	ATGCAGATACACAAAGCAAGGTGCACCAGCTATATGAAACTATACAGCGCTGGAGCCCCATTGCCTCCACCCTCCCTGAGCTGGTGCAGAGACTTGTCACCATCAAGCAGCTGCACGAGCAAGCCATGCAGTTTGGTCAGCTCCTGA	CDS
IP_211834.1	RP	OS9	ATGAGTGTCGCCTGCCAGCTGGAGCTATTCACTTCCAGCGTGAAAGGGAGGAGGAAACACCTGCTTACCAAGGGCCTGGGATCCCTGAGTTGTTGA	CDS
IP_211870.1	RP	TSPAN31	ATGAACTGGAAAGAAGTTTTGATTGTTGTGGCTTATTCAACCTCACAACCCTGTATCAACAAGATTATGATTTCTGCACTGCAATCTGCAAGAGCCAGAGCCCCACATGCCAGATGTGTGGAGAAAAGTTTCTTAAGCATTCAGACGAAGCCCTGA	CDS
IP_211878.1	RP	CDK4	ATGAGCCAGTGGCTGAAATTGGTGTCGGTGCCTATGGGACAGTGTACAAGGCCCGTGATCCCCACAGTGGCCACTTTGTGGCCCTCAAGAGTGTGA	CDS
IP_212018.1	RP	USP15	ATGTTGGCTTTGACAGTTGGGACAAATACCAGATGGGAGATCAAAATGTGTATCCTGGACCCATTGATAACTCTGGACTTCTCAAAGATGGTGATGCCCAGTCACTTAAGGAACACCTTATTGATGAATTGGATTACATACTGTTGCCAACTGAAGGTTGGAATAAACTTGTCAGCTGGTACACATTGA	CDS
IP_212022.1	RP	USP15	ATGGAGGGATGGGAGGAGGACACTATACTGCTTTTGCAAAAAATAAAGATGATGGAAAATGGTACTATTTTGATGACAGTAGTGTCTCCACTGCATCTGAAGACCAAATTGTGTCCAAAGCAGCATATGTACTCTTCTACCAGAGACAAGACACTTTCAGTGGAACTGGCTTTTTTCCTCTTGACCGAGAAACTAAAGGTGCTTCAGCTGCCACTGGCATCCCATTAG	CDS
IP_212248.1	RP	MSRB3	ATGTCACTCAGGAGAAAGGGACCGAAAGTGCCTTTGAAGGAGAATACACACATCACAAAGATCCTGGAATATATAAATGTGTTGTTTGTGGAACTCCATTGTTTAAGTCAGAAACCAAATTTGACTCCGGTTCAGGTTGGCCTTCATTCCACGATGTGA	CDS
IP_212443.1	RP	CPSF6	ATGACGATGTCATATCTCCATCTGCAAATAATGGAGATGCCCCAGAAGACCGAGATTACATGGATACTCTCCCACCAACTGTTGGTGATGATGTGGGTAAAGGAGCAGCACCAAATGTTGTCTATACATATACTGGAAAGAGAATTGCATTATATATTGGAAATCTAA	CDS
IP_212444.1	RP	CPSF6	ATGATCGTTGCAAAGTTCTTATTAGTTCTTTGCAAGATTGCCTTCATGGAATTGAGTCCAAGTCTTATGGTTCTGGATCAAGACGTGAACGATCAAGAGAGAGGGACCATAGTAGATCACGAGAAAAGAGTCGACGTCATAAATCCCGTAGTAGAGACCGTCATGACGATTATTACAGAGAGAGAAGCAGAGAACGAGAGAGGCACCGGGATCGTGACCGAGACCGTGACCGAGAGCGTGACCGAGAGCGCGAATATCGTCATCGTTAGAAGCTGA	CDS
IP_212579.1	RP	CNOT2	ATGACGAAAACATGTACTACAGCCAGTCTTCTATGTTTCCACATCGGTCAGAAAAAGATATGCTGGCATCACCATCTACATCAGGTCAGCTGTCTCAGTTTGGGGCAAGTTTATACGGGCAACAAAGTGCACTAG	CDS
IP_212580.1	RP	CNOT2	ATGGACCCAAATTCCCTGGAGATAAAAGTTCAACAACACAAAATAATAACCAGCAGAAAAAAGGGATCCAGGTGTTACCTGATGGTCGGGTTACTAACATTCCTCAAGGGATGGTGA	CDS
IP_212617.1	MS	PTPRB	ATGAAGAGAGAACAGTGGTCTTGCAAACAGATCCTTTACCTCCTGCTAGGTTTGGAGTCAGTAAAGAGAAGACGACTTCAACCAGCTTGCATGTTTGGTGGACTCCTTCTTCCGGAAAAGTCACCTCATATGAGGTGCAATTATTTGATGAAAATAACCAAAAGATACAGGGGGTTCAAATTCAAGAAAGTACTTCATGGAATGAATACACTTTTTTCAATCTCACTGCTGGTAGTAAATACAATATTGCCATCACAGCTGTTTCTGGAGGAAAACGTTCTTTTTCAGTTTATACCAATGGATCAACAGTGCCATCTCCAGTGA	CDS
IP_212696.1	RP	RAB21	ATGTTTCCATTCAAGAAGCAGAGTCGTATGCAGAATCTGTGGGAGCAAAACATTATCATACTTCAGCCAAACAGAACAAAGGAATTGAGGAACTCTTTCTTGACCTTTGTAAAAGGATGA	CDS
IP_212842.1	RP	GLIPR1	ATGACGAAATCCAGGACTATGACTTCAAGACTCGGATATGCAAAAAAGTCTGTGGCCACTACACTCAGGTTGTTTGGGCAGATAGTTACAAAGTTGGCTGCGCAGTTCAATTTTGCCCTAAAGTTTCTGGCTTTGACGCTCTTTCCAATGGAGCACATTTTATATGCAACTACGGACCAGGAGGGAATTACCCAACTTGGCCATATAAGAGAGGAGCCACCTGCAGTGCCTGCCCCAATAATGACAAGTGTTTGGACAATCTCTGTGTTAACCGACAGCGAGACCAAGTCAAACGTTACTACTCTGTTGTATATCCAGGCTGGCCCATATATCCACGTAACAGATACACTTCTCTCTTTCTCATTGTTAATTCAGTAA	CDS
IP_212845.1	RP	KRR1	ATGAATCAGAACTCCTTACGGTTCCTGATGGTTGGAAGGAACCAGCTTTTTCCAAAGAGGACAATCCCAGAGGACTTTTGGAGGAGAGCAGTTTCGCAACTTTGTTCCCAAAATACAGGGAAGCTTACTTGA	CDS
IP_212875.1	RP	NAP1L1	ATGAGGAAGTTCACGATCTTGAAAGGAAGTATGCTGTTCTCTATCAGCCTCTATTTGATAAGCGATTTGAAATTATTAATGCAATTTATGAACCTACGGAAGAAGAATGTGAATGGAAACCAGATGAAGAAGATGAGATTTCGGAGGAATTGA	CDS
IP_212893.1	MS	OSBPL8	ATGATAGTGAAATTGAACGACAACATTTTAAGGACCAAGATATGTATTCTGATAAATCTGATAAAGAAAATGATCAAGAACATGATGAGTCTGATAATGAGGTGA	CDS
IP_212942.1	RP	CSRP2	ATGAAGAGATCTACTGCAAATCCTGCTACGGAAAGAAGTATGGGCCAAAAGGCTACGGTTATGGCCAGGGCGCTGGCACGCTTAACATGGACCGTGGCGAGAGGCTGGGCATCAAACCAGAGAGTGTTCAGCCTCACAGGCCTACAACAAATCCAAACACTTCTAAATTTGCTCAGAAATATGGAGGTGCTGAGAAGTGTTCCAGATGTGGGGATTCTGTATATGCTGCCGAGAAGATAA	CDS
IP_212959.1	MS	NAV3	ATGCAACTCAGTCTAATCACAGTGGAATTGCAACCAGTCAAAAAAAGCCTACTAGGCTTCCAGGGCCCTCTAGGGTGCCTGCTGCAGGAAGCAGCAGCAAGGTCCAGGGAGCCTCTAATTTAA	CDS
IP_213031.1	RP	PPP1R12A	ATGAAGAAAAAGAAAAAGAGGAAAAAGAGAAACAAGATAAAGAGAAACAAGAAGAAAAGAAGGAGTCAGAAACATCTAGAGAAGATGAATATAAACAAAAGTACTCCAGAACGTATGATGAGACTTACCAGCGTTATAGGCCAGTATCAACTTCAAGTTCAACCACTCCATCCTCTTCACTTTCTACTATGA	CDS
IP_213034.1	RP	PPP1R12A	ATGAAAGAGAGGGAGAAAAAAGAGAAGAGGAGAAAGAAGGAGAAGATAAATCACAACCTAAATCAATCAGAGAACGACGACGACCAAGAGAGAAAAGAAGATCTACAGGAGTTTCATTTTGGACACAAGATAGTGATGAAAATGAACAAGAACAACAATCAGACACAGAAGAGGGATCCAATAAGAAAGAAACTCAGACGGATTCCATTTCTAGATATGAAACCAGTTCTACATCAGCTGGTGATCGATATGATTCCTTGCTGGGTCGCTCTGGATCATACAGTTACTTAG	CDS
IP_213390.1	RP	ATP2B1	ATGACAACTTTACAAGCATTGTTAAAGCAGTTATGTGGGGACGAAATGTCTATGACAGCATCTCAAAATTCCTTCAGTTCCAACTTACTGTTAATGTAG	CDS
IP_213392.1	RP	ATP2B1	ATGATGGAGACTTTGGAATTACGCTCGCAGAGCTGCGGGCTCTCATGGAGCTCAGGTCCACAGATGCATTACGAAAAATACAGGAAAGCTATGGAGATGTCTATGGAATTTGCACCAAATTGA	CDS
IP_213417.1	RP	LUM	ATGATTATGATTTTCCCCTATCAATTTATGGGCAATCATCACCAAACTGTGCACCAGAATGTAACTGCCCTGAAAGCTACCCAAGTGCCATGTACTGTGATGAGCTGA	CDS
IP_213448.1	RP	BTG1	ATGGATCATCTGATGATGATGGATAAATTTGATTTTTGCTTTGGGTGGGCTCCTCTTGGGGATGGATTATGGAATTTAAACCATGTCACAGCTGTGAAGATCTGGCACAAGATAGAATGGTAA	3'UTR
IP_213497.1	MS	EEA1	ATGATTTGGAACAAGTTCTACGTCAAATTGGCGATAAGGACCAAAAGATCCAGAACCTTGAAGCTTTATTACAGAAGAGTAAAGAAAATATTTCATTACTAG	CDS
IP_213521.1	RP	UBE2N	ATGAGAGCAACGCCCGTTATTTTCATGTGGTCATTGCTGGCCCTCAGGATTCCCCCTTTGAGGGAGGGACTTTTAAACTTGAACTATTCCTTCCAGAAGAATACCCAATGGCAGCCCCTAAAGTACGTTTCATGA	CDS
IP_213659.1	RP	METAP2	ATGAAGATGATGAAGATGGAGATGGCGATGGAGATGGAGCAACTGGAAAGAAGAAGAAAAAGAAGAAGAAGAAGAGAGGACCAAAAGTTCAAACAGACCCTCCCTCAGTTCCAATATGTGACCTGTATCCTAATGGTGTATTTCCCAAAGGACAAGAATGCGAATACCCACCCACACAAGATGGGCGAACAGCTGCTTGGAGAACTACAAGTGAAGAAAAGAAAGCATTAG	CDS
IP_213668.1	RP	METAP2	ATGGCGACCTGGATCCAGACGACAGGGAAGAAGGAGCTGCCTCTACGGCTGAGGAAGCAGCCAAGAAAAAAAGACGAAAGAAGAAGAAGAGCAAAGGGCCTTCTGCAGGGGAACAGGAACCTGATAAAGAATCAGGAGCCTCAGTGGATGAAGTAG	CDS
IP_213751.1	RP	CDK17	ATGGTGAGAGTGACCAAGCTTCTGGGACATCATCTGATGAAGTCCAGTCACCTACAGGTGTTTGTCTCAGAAATCGTATACATAGACGGATCTCAATGGAGGATTTAA	CDS
IP_214077.1	RP	NUP37	ATGGTGGCAATAATTATGTGGTCATTGGCACGTGTACGTTTCAGGAAGAAGAAGCAGACGTTGAAGGCATTCAGTATAAAACACTTCGAACATTTCACCATGGAGTCAGGGTTGATGGCATAG	CDS
IP_214096.1	RP	IGF1	ATGCTCTTCAGTTCGTGTGTGGAGACAGGGGCTTTTATTTCAACAAGCCCACAGGGTATGGCTCCAGCAGTCGGAGGGCGCCTCAGACAGGCATCGTGGATGAGTGCTGCTTCCGGAGCTGTGATCTAA	CDS
IP_214188.1	RP	HSP90B1	ATGAATACAAAGCTTTCTACAAATCATTTTCAAAGGAAAGTGATGACCCCATGGCTTATATTCACTTTACTGCTGAAGGGGAAGTTACCTTCAAATCAATTTTATTTGTACCCACATCTGCTCCACGTGGTCTGTTTGACGAATATGGATCTAAAAAGAGCGATTACATTAAGCTCTATGTGCGCCGTGTATTCATCACAGACGACTTCCATGATATGA	CDS
IP_214318.1	MS	APPL2	ATGACGATGATGGAAATCCAAACGAACATAGAGGCGCAGAATCCGAAGCATAACTCACTTGCGCCTGTGGGGGAAGAGCAAACAGGAAGGAGAGCTACCTCCTAA	CDS
IP_214405.1	MS	RIC8B	ATGGGAATGCTGCAGGACTGTTGGCGGCCAGGGGCCTCTTGGCTGGAGGAAGAGGAGATAATTGGTACTCAGAGGATGAGGACACAGACACTGAAGAATACAAAAATGCAAAACCAAAAGAGGAGTTGCTTAAACCAATGGGACTAA	CDS
IP_214546.1	MS and RP	ISCU	ATGAAAATCCTAGAAACGTGGGGTCCCTTGACAAGACATCTAAAAATGTTGGAACTGGACTGGTGGGGGCTCCAGCATGTGGTGACGTAA	CDS
IP_214592.1	RP	CORO1C	ATGAGATGGACACTAGCAATGGGGTGTTGCTGCCTTTCTATGACCCTGACACCAGCATCATTTACTTATGTGGAAAGGGTGACAGCAGTATTCGCTATTTTGAGATCACGGATGAATCCCCGTACGTCCACTACCTCAACACATTCAGCAGCAAGGAGCCTCAGAGAGGGATGGGTTACATGCCCAAGAGGGGACTTGATGTTAACAAATGTGAGATTGCCAGATTCTTCAAACTTCATGAGAGAAAGTGTGAACCTATTATTATGA	CDS
IP_214951.1	RP	VPS29	ATGTGGACATTCTTATCTCGGGACACACACACAAATTTGAAGCATTTGAGCATGAAAATAAATTCTACATTAATCCAGGTTCTGCCACTGGGGCATATAATGCCTTGGAAACAAACATTATTCCATCATTTGTGTTGA	CDS
IP_215015.1	RP	PPP1CC	ATGACAGAGGAGTGTCCTTCACATTTGGTGCAGAAGTGGTTGCAAAATTTCTCCATAAGCATGATTTGGATCTTATATGTAGAGCCCATCAGGTGGTTGAAGATGGATATGAATTTTTTGCAAAGAGGCAGTTGGTCACTCTGTTTTCTGCGCCCAATTATTGCGGAGAGTTTGACAATGCAGGTGCCATGA	CDS
IP_215023.1	MS	CCDC63	ATGATCGCAATGAATTCGAGGAGCAGGCCAAAAGGGAGGAAGCTCTCAAGGCAAAGAAGCATGTCAAGAAGAACAGGGGAGAGAGTTTTGAGAGCTATGAGGTGGCCCACCTCCGGCTGCTGA	CDS
IP_215080.1	MS	ATXN2	ATGCAAAGGAGTTCAACCCACGTTCCTTCTCTCAGCCAAAGCCTTCTACTACCCCAACTTCACCTCGGCCTCAAGCACAACCTAGCCCATCTATGGTGGGTCATCAACAGCCAACTCCAGTTTATACTCAGCCTGTTTGTTTTGCACCAAATATGA	CDS
IP_215081.1	RP	ATXN2	ATGGCGAACACAAAGAGAAGGACCTGGAGCCCTGGGATGCAGGTGAACTCACAGCCAATGAGGAACTTGAGGCTTTGGAAAATGACGTATCTAATGGATGGGATCCCAATGATATGTTTCGATATAATGAAGAAAATTATGGTGTAG	CDS
IP_215084.1	RP	ATXN2	ATGGAGGTATATATGAAGGAGTTTTTAAAACTTACAGTCCGAAGTGTGATTTGGTACTTGATGCCGCACATGAGAAAAGTACAGAATCCAGTTCGGGGCCGAAACGTGAAGAAATAA	CDS
IP_215162.1	RP	TRAFD1	ATGACCAGGAAACTCGACTGTGTGACAACTGCAAAAAAGAAATTCCTGTGTTTAACTTTACCATCCATGAGATCCACTGTCAAAGGAACATTGGTATGTGTCCTACCTGTAAGGAACCATTTCCCAAATCTGACATGGAGACTCACATGGCTGCAGAACACTGTCAGGTGA	CDS
IP_215205.1	RP	PTPN11	ATGGTGATCCCAATGAGCCTGTTTCAGATTACATCAATGCAAATATCATCATGCCTGAATTTGAAACCAAGTGCAACAATTCAAAGCCCAAAAAGAGTTACATTGCCACACAAGGCTGCCTGCAAAACACGGTGA	CDS
IP_215209.1	RP	PTPN11	ATGGCAGTTTTTTGGCAAGGCCTAGTAAAAGTAACCCTGGAGACTTCACACTTTCCGTTAGAAGAAATGGAGCTGTCACCCACATCAAGATTCAGAACACTGGTGATTACTATGACCTGTATGGAGGGGAGAAATTTGCCACTTTGGCTGAGTTGGTCCAGTATTACATGGAACATCACGGGCAATTAA	CDS
IP_215323.1	RP	DDX54	ATGACGCCCGGGCCCGGAAGCTGGGACCTGGAAGACCCCTGCCCACCTTCCCCACCTCGGAATGCACCTCGGATGTGGAGCCGGACACCCGGGAGATGGTGCGTGCCCAGAACAAGAAGAAGAAGAAGTCTGGAGGCTTCCAGTCCATGGGCCTGA	CDS
IP_215686.1	MS and RP	TAOK3	ATGAGGCGGGCCACGGCGATCCCAGGCCTGAGCCGCGGCCTACCCAGTCAGTTCAGAGCCAGGCCCTCCACTACCGGAACAGAGAGCGCTTTGCCACGATCAAATCAGCATCTTTGGTTACACGACAGATCCATGAGCATGAGCAGGAGAACGAGTTGCGGGAACAGATGTCAGGTTATAAGCGGATGCGGCGCCAGCACCAGAAGCAGCTGA	CDS
IP_215687.1	RP	TAOK3	ATGATCCTGAGGAACTTTTTATTGGTTTGCATGAAATTGGACATGGAAGTTTTGGAGCAGTTTATTTTGCTACAAATGCTCACACCAGTGAGGTGGTGGCAATTAAGAAGATGTCCTATAGTGGGAAGCAGACCCATGAGAAATGGCAAGATATTCTTAAGGAAGTTAAATTTTTACGACAATTGA	CDS
IP_215843.1	MS and RP	GCN1L1	ATGCCATCCAAGATAAGAAGAACTTCCGCCGGCGAGAGGGAGCCCTCTTTGCCTTCGAGATGCTCTGCACCATGCTGGGGAAACTTTTTGAGCCGTATGTGGTTCACGTGCTGCCCCATCTGCTCCTGTGCTTTGGGGATGGAAACCAGTATGTGCGTGAGGCTGCAGATGACTGTGCCAAGGCTGTGA	CDS
IP_215855.1	RP	RPLP0	ATGATTATCCGAAATGTTTCATTGTGGGAGCAGACAATGTGGGCTCCAAGCAGATGCAGCAGATCCGCATGTCCCTTCGCGGGAAGGCTGTGGTGCTGA	CDS
IP_215857.1	RP	RPLP0	ATGTTTCATTGTGGGAGCAGACAATGTGGGCTCCAAGCAGATGCAGCAGATCCGCATGTCCCTTCGCGGGAAGGCTGTGGTGCTGATGGGCAAGAACACCATGATGCGCAAGGCCATCCGAGGGCACCTGGAAAACAACCCAGCTCTGGAGAAACTGCTGCCTCATATCCGGGGGAATGTGGGCTTTGTGTTCACCAAGGAGGACCTCACTGA	CDS
IP_215932.1	RP	SRSF9	ATGTCTGTTATGCTGATGTGCAGAAGGATGGAGTGGGGATGGTCGAGTATCTCAGAAAAGAAGACATGGAATATGCCCTGCGTAAACTGGATGACACCAAATTCCGCTCTCATGAGGGTGAAACTTCCTACATCCGAGTTTATCCTGAGAGAAGCACCAGCTATGGCTACTCACGGTCTCGGTCTGGGTCAAGGGGCCGTGACTCTCCATACCAAAGCAGGGGTTCCCCACACTACTTCTCTCCTTTCAGGCCCTACTGAGACAGGTGATGGGAATTTTTTCTTTATTTTTTAG	CDS
IP_215935.1	RP	DYNLL1	ATGAAACCAAACACTTCATCTACTTCTACCTGGGCCAAGTGGCCATTCTTCTGTTCAAATCTGGTTAAAAGCATGGACTGTGCCACACACCCAGTGATCCATCCAAAAACAAGGACTGCAGCCTAA	CDS
IP_215937.1	RP	COQ5	ATGCTGAAGAACTGCCCTTTGATGATGACAAGTTTGATATTTACACCATTGCCTTTGGGATCCGGAATGTCACACACATTGATCAGGCACTCCAGGAAGCTCATCGGGTGCTGA	CDS
IP_215957.1	RP	POP5	ATGCAGAAAAGAATTCTATCAGCTTGTGTGGTCAGCTCTTCCCTTCATCACATACTTGGAGAACAAAGGACACCGTTACCCATGCTTTTTCAACACATTACATGTGGGAGGTACAATAAGAACATGTCAGAAGTTCCTAATTCAGTACAACAGGAGACAGCTGTTGATCTTGTTGCAGAACTGCACTGA	CDS
IP_216101.1	RP	RNF34	ATGTTCTACTTGTCACTTATTACAAGAGACAGCATTTCAGCGCCCTCAGTTAATGCGACTGAAGGTGAAGGACCTGCGGCAGTATCTCATTCTGAGAAATATACCCATAGATACTTGTCGTGA	CDS
IP_216103.1	RP	RNF34	ATGAAGAAAACCAAAAGTCCTATGGCGAGCGGCTGCAGCTGCAGGATGAGGAAGACGACAGCCTGTGTCGCATCTGCATGGATGCCGTCATCGACTGTGTCCTACTGGAGTGTGGGCACATGGTTACCTGCACCAAGTGCGGCAAGCGCATGA	CDS
IP_216114.1	MS	KDM2B	ATGAAATCATCCACCCTGGATGCCTTAAGATTAAGGAGTCAGAGGGTGTGGTCAACGACGAGCTTCCAAACTGCTGGGAGTGTCCGAAGTGTAACCACGCCGGCAAGACCGGGAAACAAAAGCGTGGCCCTGGCTTTAAGTACGCCTCCAACCTGCCCGGCTCCCTGCTCAAGGAGCAGAAGATGA	CDS
IP_216115.1	RP	KDM2B	ATGGGGCAGCCCACGTCATGCACAGGGAGGTGTGGATGGCCGTCTTCAGCTACCTCAGCCACCAAGACCTGTGTGTGTGCATGCGGGTCTGCAGGACCTGGAACCGCTGGTGCTGCGATAAGCGGTTGTGGACCCGCATTGACCTGA	CDS
IP_216117.1	RP	KDM2B	ATGCCGCAAGTGCGAGGCCTGCCTGCGGACCGAGTGCGGAGAGTGCCACTTCTGCAAGGACATGAAGAAGTTCGGGGGCCCCGGGCGCATGAAGCAGAGCTGCATCATGCGGCAGTGCATCGCGCCAGTGCTGCCCCACACCGCCGTGTGCCTTGTGTGTGGCGAGGCGGGGAAGGAAGACACGGTGGAAGAGGAGGAAGGCAAGTTTAA	CDS
IP_216343.1	RP	RSRC2	ATGGTGAGGACAGGCACAAACGCAAAGAAAGAAAGTCATCAAGAGGCAGAAGTCACTCAAGATCTAGGTCTCGTGAAAGACGCCATCGTAGTAGAAGCAGGGAGCGGAAGAAGTCTCGATCCAGGAGTAGGGAGCGGAAGAAATCGAGATCCAGAAGCAGAGAGAGGAAGAAATCGAGATCCAGAAGCAGGGAAAGAAAACGGCGGATCAGGTCTCGTTCCCGCTCAAGATCAAGACACAGGCATAGGACTAGAAGCAGGAGTAGGACAAGGAGTAGGAGTCGAGATAGAAAGAAGAGAATTGAAAAGCCGAGAAGATTTAGCAGAAGTTTAA	CDS
IP_216348.1	MS	RSRC2	ATGAATCCAAAGATAAATCCTCTAAGAAACATAAGTCTGAGGAACATAATGACAAAGAACATTCTTCTGATAAAGGAAGAGAGCGACTAA	CDS
IP_216699.1	RP	CCDC92	ATGAAGGTCCTCTGGATGTCAGCATGGCAGCCACAAACCTGGAGAACCAGCTGCACAGCGCACAGAAGAACCTCCTGTTCCTTCAGCGGGAGCATGCCAGCACGCTCAAGGGGCTGCACTCCGAGATCAGGCGGCTGCAGCAGCACTGCACAGATTTAA	CDS
IP_216770.1	RP	AACS	ATGATGACTTGTACCATTGGTCCGTTGAGTCATATTCAGACTTCTGGGCAGAGTTCTGGAAATTCAGTGGAATTGTCTTCTCACGTGTGTATGATGAGGTTGTGGACACATCGAAAGGAATCGCAGATGTCCCCGAGTGGTTCAAAGGCAGTCGGCTCAACTATGCAGAAAACCTCCTGCGGCACAAAGAGAATGACAGAGTTGCCCTTTACATTGCAAGGGAAGGCAAAGAGGAAATTGTGA	CDS
IP_218500.1	RP	MPHOSPH8	ATGATGATACCTGGGAGCCCGAGATTCACCTGGAGGACTGTAAAGAAGTGCTTCTTGAATTTAGGAAGAAAATTGCAGAGAACAAAGCCAAAGCAGTCAGGAAGGATATTCAGAGACTATCCTTAA	CDS
IP_218514.1	RP	PSPC1	ATGCATCTCGATGGAAGGCTCTTGATGAAATGGAAAAGCAGCAGCGTGAGCAGGTTGATAGAAACATCAGAGAAGCCAAAGAGAAACTGGAGGCAGAAATGGAAGCAGCTAGGCATGAACACCAATTAA	CDS
IP_218515.1	RP	PSPC1	ATGGAGCAGTGCACAATGACAGATTTCCTCAAGGACCACCATCTCAGATGGGTTCACCTATGGGGAGTAGAACAGGTTCTGAAACCCCTCAAGCACCAATGA	CDS
IP_218536.1	RP	ZMYM2	ATGAGATCCGACGGCCAAATGGAGAGAATTATGCACCTGACAGCATCTATTACCTTTGCCTTGGAATACAGGAGTATTTGTGTGGAAGTAATCGAAAAGACAACATATTTATTGATCCTGGATACCAAACATTTGAGCAAGAATTGA	CDS
IP_218730.1	RP	SACS	ATGCAGAAGATGCTGGGGCGACAGAAGTTAAATTTTTATATGATGAAACTCAATACGGAACAGAGACTCTTTGGTCAAAAGATATGGCGCCATATCAGGGGCCAGCTCTCTATGTGTACAACAACGCGGTTTTCACCCCAGAGGACTGGCACGGCATTCAAGAAATAG	CDS
IP_218759.1	RP	MIPEP	ATGCAGAGCAGCCTGCAAAAGGAGAGGTGTGGAGCGAAGATGTCCGAAAACTGGCTGTTGTTCATGAATCTGAAGGATTGTTGGGGTACATTTACTGTGATTTTTTTCAGCGAGCAGACAAACCACATCAGGATTGCCATTTCACTATCCGTGGAGGCAGACTAA	CDS
IP_218893.1	RP	MTMR6	ATGCCAGTTTGGAAACTTCCTTGGAAATTGTCAGAAGGAAAGAGAAGAGCTCAAGTTGAAGGAGAAGACTTATTCCCTGTGGCCATTTCTTTTGGAAGACCAAAAGAAGTACTTAAATCCTCTCTACAGTTCCGAATCTCACAGATTTACAGTTTTGGAGCCAAATACAGTATCTTTCAATTTTAA	CDS
IP_218906.1	RP	NUPL1	ATGCTGTTGATGTGTTTGAAACAAGGCGAGCAGAAGCCAAGAAGTGGCAGAACACACCCAGAGTTACTACTGGACCCACTCCTTTCAGCACCATGCCAAACGCAGCAGCCGTTGCCATGGCTGCAACACTTACACAGCAGCAACAGCCTGCTACAGGGCCACAGCCATCTCTGGGAGTTAGTTTTGGAACGCCATTCGGCTCAGGTATTGGCACTGGCTTGCAATCAAGTGGCTTAG	CDS
IP_218954.1	RP	RNF6	ATGGTGGCAGTGAAGAAACCTTACCTCAAGACCATAATCATCATGAAAATGAGAGAAGATGGCAGCAAGAGCGTCTCCACAGAGAAGAGGCCTATTATCAGTTTATTAATGAACTCAATGATGAAGATTATCGGCTTATGA	CDS
IP_219206.1	MS	KATNAL1	ATGACAAGGGAAGGAAGAATATGCAAGATGGTGCAAGTGATGGTGAAATGCCAAAATTTGATGGTGCTGGTTATGATAAGGATCTGGTGGAAGCCCTTGAAAGAGACATTGTATCCAGGAATCCTAGCATTCATTGGGATGACATAG	CDS
IP_219218.1	RP	HMGB1	ATGCATTTTTTGTGCAAACTTGTCGGGAGGAGCATAAGAAGAAGCACCCAGATGCTTCAGTCAACTTCTCAGAGTTTTCTAAGAAGTGCTCAGAGAGGTGGAAGACCATGTCTGCTAAAGAGAAAGGAAAATTTGAAGATATGGCAAAAGCGGACAAGGCCCGTTATGAAAGAGAAATGA	CDS
IP_219233.1	MS and RP	USPL1	ATGGAGAAGTATATGACGAAACCTCGTCAAACTTACCTGATAGTAGTGGTCAACAGAATCCAATTAGGACAGCTGATTCCTTGGAGCGGAATGAGATTTTGGAAGCTGATACTGTTGACATGGCTACTACAAAAGATCCTGCTACAGTTGATGTCTCTGGAACTGGCAGACCTTCCCCTCAAAATGAAGGATGTACATCTAAACTGGAAATGCCACTGGAGAGCAAATGTACATCATTTCCCCAGGCTTTATGTGTCCAGTGGAAAAATGCTTATGCTCTCTGTTGGTTAG	CDS
IP_219238.1	RP	ALOX5AP	ATGTTGTCCTGTTGGCCATCGTCACCCTCATCAGCGTGGTCCAGAATGGATTCTTTGCCCATAAAGTGGAGCACGAAAGCAGGACCCAGAATGGGAGGAGCTTCCAGAGGACCGGAACACTTGCCTTTGAGCGGGTCTACACTGCCAACCAGAACTGTGTAG	CDS
IP_219328.1	MS	BRCA2	ATGCAGAGTCTTTTCAGTTTCACACTGAAGATTATTTTGGTAAGGAAAGTTTATGGACTGGAAAAGGAATACAGTTGGCTGATGGTGGATGGCTCATACCCTCCAATGATGGAAAGGCTGGAAAAGAAGAATTTTATAGGGCTCTGTGTGACACTCCAGGTGTGGATCCAAAGCTTATTTCTAGAATTTGGGTTTATAATCACTATAGATGGATCATATGGAAACTGGCAGCTATGGAATGTGCCTTTCCTAAGGAATTTGCTAATAGATGCCTAA	CDS
IP_219367.1	RP	PDS5B	ATGAAGATGAACAGAATAGTCCGCCAAAAAAGGGTAAAAGAGGCCGACCACCAAAACCTCTTGGTGGAGGTACACCAAAAGAAGAGCCAACAATGA	CDS
IP_219368.1	MS	PDS5B	ATGATAATGAGGAGCGCCTACAAGTTGTTAAACTACTGGCAAAAATGTTTGGGGCAAAGGATTCAGAATTGGCTTCTCAAAACAAGCCACTTTGGCAGTGCTACTTGGGCAGGTTTAATGATATCCATGTACCAATCCGCCTGGAATGTGTGA	CDS
IP_219435.1	RP	RFC3	ATGAGCATCGTCTACAGCTGGGTAGCAAAGCCATTTATCACTTGGAAGCGTTTGTGGCCAAATTCATGGCACTTTATAAGAAGTTCATGGAGGATGGATTGGAAGGCATGA	CDS
IP_219600.1	RP	EXOSC8	ATGCCCCTGATAAAGGATACGTTGTTCCTAATGTGGATCTACCACCCCTGTGTTCATCGAGATTCCGGTCTGGACCTCCTGGAGAAGAGGCCCAAGTGGCTAGCCAGTTCATTGCAGATGTCATTGAAAATTCACAGATAA	CDS
IP_220011.1	RP	TPT1	ATGAGATGTTCTCCGACATCTACAAGATCCGGGAGATCGCGGACGGGTTGTGCCTGGAGGTGGAGGGGAAGATGGTCAGTAGGACAGAAGGTAACATTGATGACTCGCTCATTGGTGGAAATGCCTCCGCTGAAGGCCCCGAGGGCGAAGGTACCGAAAGCACAGTAA	CDS
IP_220194.1	RP	SUCLA2	ATGGAGCTGTATTGTGTATGGATGCAAAGATCAATTTTGACTCTAATTCAGCCTATCGCCAAAAGAAAATCTTTGATCTACAGGACTGGACCCAGGAAGATGAAAGGGACAAAGATGCTGCTAAGGCAAATCTCAACTACATTGGCCTCGATGGAAATATAG	CDS
IP_220210.1	RP	ITM2B	ATGAGCCCTCTGCAGATGCCCCAGCTGCTCTCTACCAGACAATTGAAGAAAATATTAAAATCTTTGAAGAAGAAGAAGTTGAATTTATCAGTGTGCCTGTCCCAGAGTTTGCAGATAGTGATCCTGCCAACATTGTTCATGACTTTAACAAGAAACTTACAGCCTATTTAG	CDS
IP_220234.1	RP	RCBTB2	ATGAAGGCCAAGTGTATGCTTGGGGCGCCAATTCTTATGGGCAGTTGGGCACTGGCAATAAAAGCAACCAGTCCTATCCTACTCCTGTCACTGTGGAAAAGGACAGGATTATCGAGATTGCAGCCTGTCACTCCACACACACGTCTGCGGCCAAGACGCAGGGTGGGCACGTGTACATGTGGGGCCAGTGCCGGGGTCAGTCCGTGA	CDS
IP_220246.1	RP	FNDC3A	ATGGTTCTGTGCCTCCTATCTATGTGCCTCCTGGATATGCCCCACAGGTTATTGAAGACAATGGTGTTCGAAGAGTTGTCGTGGTCCCTCAGGCACCAGAGTTTCACCCTGGTAGTCACACAGTTCTCCACCGTTCTCCACATCCTCCTCTACCTGGTTTCATTCCTGTCCCAACTATGA	CDS
IP_220389.1	RP	TRIM13	ATGTCTTCTGTTCTATTGAAGATGCCTATGCTCAGGAAAGGGATGCCTTTGAGTCCCTCTTCCAGAGCTTTGAGACCTGGCGTCGGGGAGATGCTCTTTCTCGCTTGGATACCTTGGAAACTAGTAAGAGGAAATCCCTACAGTTACTGA	CDS
IP_220854.1	RP	TBC1D4	ATGACTATCACAGAGATCTCTACAATCACCTTGAAGAAAATGAAATCAGCCCCAGTCTTTATGCTGCCCCCTGGTTCCTCACATTGTTTGCCTCTCAGTTTTCATTAG	CDS
IP_220856.1	RP	TBC1D4	ATGAGCAGCAGGAGTTTCGGTCTCGGTGCAGCAGTGTCACCGGCGTGCAACGGAGAGTTCACGAGGGCAGCCAGAAATCCCAGCCGCGACGGAGACACGCGAGCGCACCCAGTCACGTCCAGCCCTCGGACTCGGAGAAGAACAGGACCATGCTCTTCCAGGTTGGGCGATTTGAGATTAACCTTATCAGTCCAGACACTAAATCAGTTGTGCTAG	CDS
IP_220881.1	RP	UCHL3	ATGTATATGGAATGGATCCTGAACTCCTTAGCATGGTACCAAGACCAGTCTGTGCAGTCTTACTTCTCTTTCCTATTACAGAAAAGTATGAAGTATTCAGAACAGAAGAGGAAGAAAAAATAA	5'UTR
IP_220973.1	RP	MYCBP2	ATGACAAAGCTTCTTTCTATGGTTTTAAGTGTTTTGCAATTGGATATGAATTTAGCCCTGGACCTGATGAGGGAGTCATCCAATTGGAAAAAGAATTAG	CDS
IP_220981.1	RP	MYCBP2	ATGGGAGGATGCCTTCTAGCTCCAGAGCTGAATCCCCAGGACCAGGTTCTCGGTTGTCATCTCCTAAGCCAAAGACTCTCCCAGCCAATAGGTCTAGCCCATCGGGTGCTAGTTCTCCACGCTCCTCCTCACCACATGATAAAAATCTACCTCAAAAAAGTACTGCTCCTGTTAAGACAAAGCTTGATCCTCCTCGGGAACGTTCTAAATCAGACTCTTACACACTTGATCCAGATACCCTCCGCAAGAAGAAAATGCCCCTCACAGAACCTTTGA	CDS
IP_221033.1	RP	SLAIN1	ATGACCAATACAGTCTGGAGGATGAAGAGGAATTTGATCATTTGCCACCACCTCAGCCTCGTCTTCCAAGATGTTCCCCTTTCCAAAGAGGAATTCCCCATTCACAGACTTTCTCCAGCATTCGGGAGTGTAGGAGGAGCCCCAGTTCCCAGTATTTTCCTTCAAATAATTACCAGCAGCAACAGTATTATTCACCTCAAGCCCAAACTCCAGATCAGCAACCAAATAGGACCAATGGAGATAAGCTCCGAAGAAGTATGCCTAACCTAG	CDS
IP_221035.1	RP	SLAIN1	ATGATTCTATCTCCATGGGATATAAATTACAGGACCTCACTGATGTTCAGATCATGGCTCGTCTGCAAGAAGAAAGTCTCAGGCAAGATTATGCTTCTACTTCAGCATCTGTATCAAGACATAGTTCCAGTGTGTCATTGA	CDS
IP_221118.1	RP	SPRY2	ATGTGTTCTAAGCCTGCTGGAGTGACCACACTTCCAAGACCTGATGGAGGCCAGAGCTCAGAGTGGCAACGGGTCGCAGCCCTTGCTGCAGACGCCCCGTGA	5'UTR
IP_221366.1	RP	IPO5	ATGGGCCAGAATGTGCAAAATCCTTGGAAAAGAATTTCAGCAATACCTTCCAGTGGTTATGGGGCCTTTAATGAAGACGGCTTCAATTAA	CDS
IP_221498.1	RP	TM9SF2	ATGCCATTGAACACCCAGTTCGAACCAATCAGATTCCACGTCAGATTCCTGAACAGTCGTTCTACACGAAGCCCTTGCCTGGTATTATCATGGGAGGGATTTTGCCCTTTGGCTGCATCTTTATACAACTTTTCTTCATTCTGA	CDS
IP_221500.1	RP	TM9SF2	ATGTTGAAGATGGTCAGAGGTTCTGTAATCCTGGATTTCCTATTGGCTGTTACATTACAGATAAAGGCCATGCAAAAGATGCCTGTGTTATTAGTTCAGATTTCCATGAAAGAGATACATTTTACATCTTCAACCATGTTGACATCAAAATATACTATCATGTTGTTGAAACTGGGTCCATGGGAGCAAGATTAG	CDS
IP_221502.1	RP	TM9SF2	ATGAATACACAGCGTTTGATTTTTGCCAAGCATCAGAAGGAAAGCGCCCATCTGAAAATCTTGGTCAGGTACTATTCGGGGAAAGAATTGAACCTTCACCATATAAGTTTACGTTTAATAAGAAGGAGACCTGTAAGCTTGTTTGTACAAAAACATACCATACAGAGAAAGCTGAAGACAAACAAAAGTTAG	CDS
IP_221614.1	RP	TPP2	ATGGCTATGACTTCTATCCTAAGGCACTCAAGGAAAGGATACAGAAAGAACGGAAGGAAAAAATCTGGGACCCTGTTCACAGAGTGGCCCTTGCAGAAGCCTGTAGAAAACAGGAAGAATTTGATGTTGCCAACAACGGCTCTTCTCAAGCAAATAAACTAA	CDS
IP_221725.1	RP	ARGLU1	ATGAAATTGAACGAGAAGTTCTCCGAAGGGTGGAGGAAGCCAAACGCATCATGGAAAAGCAGTTGCTCGAAGAACTCGAGCGACAGAGACAAGCTGAGCTTGCCGCACAAAAAGCTAGAGAGGAGGAAGAACGTGCAAAACGTGAGGAGCTAG	CDS
IP_223291.1	RP	APEX1	ATGCTCGATCCAAGAATGTTGGTTGGCGCCTTGATTACTTTTTGTTGTCCCACTCTCTGTTACCTGCATTGTGTGACAGCAAGATCCGTTCCAAGGCCCTCGGCAGTGATCACTGTCCTATCACCCTATACCTAG	CDS
IP_223495.1	RP	CHD8	ATGAACGTATTGATGGGCGAGTTAGAGGCAACCTTCGACAGGCTGCCATTGACCGCTTCAGCAAGCCTGACTCAGACCGCTTTGTCTTCTTACTGTGTACCCGGGCTGGTGGACTTGGTATTAATCTTACAGCTGCTGATACCTGCATCATCTTTGATTCAGACTGGAATCCACAAAATGACCTGCAGGCCCAGGCACGATGTCATCGAATTGGGCAGAGCAAAGCTGTGA	CDS
IP_223501.1	RP	CHD8	ATGGTGACTCTCCAGTCCCCACACCACGAAGTAGTAGTGCAGCTTCCATGGCAGAGGAGGAAGCATCTGCAGTCAGCACAGCGGCAGCCCAGTTCACCAAACTTCGCCGAGGCATGGATGAAAAGGAGTTTACAGTTCAAATCAAAGATGAGGAAGGATTGA	CDS
IP_223527.1	RP	TOX4	ATGGTGTTGAGGATTTCCGGAGGCAACTTCCCAGCCAGAAGACAGTCGTGGTGGAAGCAGGGAAAAAGCAGAAGGCCCCAAAGAAGAGAAAAAAGAAAGATCCTAATGAACCTCAGAAACCAGTTTCAGCATATGCTTTATTCTTTCGTGATACACAGGCTGCCATCAAGGGACAGAATCCTAATGCCACTTTTGGTGAGGTTTCAAAAATTGTGGCCTCCATGTGGGATAGTCTTGGAGAGGAGCAAAAACAGGTATATAAGAGGAAAACTGAGGCTGCCAAGAAAGAGTATCTGA	CDS
IP_223529.1	RP	TOX4	ATGAGGAATTTGAAATCCCACCTATCTCCTTGGATTCTGATCCCTCATTGGCTGTCTCAGATGTGGTTGGCCACTTTGATGACCTGGCAGACCCTTCCTCTTCACAGGATGGCAGTTTTTCAGCCCAGTATGGGGTCCAGACATTGGACATGCCTGTGGGCATGA	CDS
IP_223530.1	RP	METTL3	ATGATGAGATGCGCAGGCTCAACATACCCGTACTACAGGATGATGGCTTTCTCTTCCTCTGGGTCACAGGCAGGGCCATGGAGTTGGGGAGAGAATGTCTAA	CDS
IP_223603.1	MS and RP	LRP10	ATGAGGAGGACTGCCCAGGCTGCCCACCTGGACACTTCCCCTGTGGGGCTGCTGGCACCTCTGGTGCCACAGCCTGCTACCTGCCTGCTGACCGCTGCAACTACCAGACTTTCTGTGCTGATGGAGCAGATGAGAGACGCTGTCGGCATTGCCAGCCTGGCAATTTCCGATGCCGGGACGAGAAGTGCGTGTATGAGACGTGGGTGTGCGATGGGCAGCCAGACTGTGCGGACGGCAGTGATGAGTGGGACTGCTCCTATGTTCTGCCCCGCAAGGTCATTACAGCTGCAGTCATTGGCAGCCTAG	CDS
IP_223631.1	RP	PRMT5	ATGAGGTCCGAGCCTGTAGGGAGAAGGACCGTGACCCTGAGGCCCAGTTTGAGATGCCTTATGTGGTACGGCTGCACAACTTCCACCAGCTCTCTGCACCCCAGCCCTGTTTCACCTTCAGCCATCCCAACAGAGATCCTATGA	CDS
IP_223633.1	RP	PRMT5	ATGTCTGCTAGACCGAGTACCAGAAGAGGAGAAGGATACCAATGTCCAGGTACTGATGGTGCTGGGAGCAGGACGGGGACCCCTGGTGAACGCTTCCCTGCGGGCAGCCAAGCAGGCCGACCGGCGGATAAAGCTGTATGCTGTGGAGAAAAACCCAAATGCCGTGGTGACGCTAGAGAACTGGCAGTTTGA	CDS
IP_223715.1	MS and RP	ACIN1	ATGATGTTCCAGAACCTCCCATGCCTATTGCAGACCAAGTCAGCAATGATGACCGCCCGGAGGGCAGTGTTGAAGATGAGGAGAAGAAAGAGAGCTCGCTGCCCAAATCATTCAAGAGGAAGATCTCCGTTGTCTCAGCTACCAAGGGGGTGCCAGCTGGAAACAGTGACACAGAGGGGGGCCAGCCTGGTCGGAAACGACGCTGGGGAGCCAGCACAGCCACCACACAGAAGAAACCTTCCATCAGTATCACCACTGAATCACTAA	CDS
IP_223717.1	RP	ACIN1	ATGACCCAGTCCGAACTGCCCAGGTGCCCTCCCCACCCCGGGGCAAGATTAGCAACATTGTCCATATCTCCAATTTGGTCCGTCCTTTCACTTTAG	CDS
IP_223722.1	MS and RP	ACIN1	ATGATGTTCCAGAACCTCCCATGCCTATTGCAGACCAAGTCAGCAATGATGACCGCCCGGAGGGCAGTGTTGAAGATGAGGAGAAGAAAGAGAGCTCGCTGCCCAAATCATTCAAGAGGAAGATCTCCGTTGTCTCTACCAAGGGGGTGCCAGCTGGAAACAGTGACACAGAGGGGGGCCAGCCTGGTCGGAAACGACGCTGGGGAGCCAGCACAGCCACCACACAGAAGAAACCTTCCATCAGTATCACCACTGAATCACTAA	CDS
IP_223892.1	MS	ZFHX2	ATGAAGCTTACCGCACCCCCACCATGCAGGAGTGTGAGGTGCTGGGAGAGGAGATTGGGCTGCCCAAGAGAGTCATCCAGGTCTGGTTCCAGAATGCTCGTGCCAAGGAAAAGAAGGCCAAACTACAGGGGACAGCCGCTGGGAGCACTGGGGGCAGCAGTGAGGGCCTCTTAG	CDS
IP_224060.1	RP	PSME2	ATGATGAGATGGAAACAGATAAGCAGGAGAAGAAAGAAGTCCATAAGTGTGGATTTCTCCCTGGGAATGAGAAAGTCCTGTCCCTGCTTGCCCTGGTTAAGCCAGAAGTCTGGACTCTCAAAGAGAAATGCATTCTGGTGA	5'UTR
IP_224213.1	MS	NFATC4	ATGAAGACCCTGCTTGCGAAACTCCTTACCTATCAGAAGGCTTCGGCTATGGCATGCCCCCTCTGTACCCCCAGACGGGGCCCCCACCATCCTACAGACCGGGCCTGCGGATGTTCCCTGAGACTAGGGGTACCACAGGTTGTGCCCAACCACCTGCAGTTTCCTTCCTTCCCCGCCCCTTCCCTAGTGACCCGTATGGAGGGCGGGGCTCCTCTTTCTCCCTGGGGCTGCCATTCTCTCCGCCAGCCCCCTTTCGGCCGCCTCCTCTTCCTGCATCCCCACCGCTTGAAGGCCCCTTCCCTTCCCAGAGTGATGTGCATCCCCTACCTGCTGAGGGATACAATAAGGTAG	CDS
IP_224269.1	RP	KHNYN	ATGGTAAACAGCAGCAGGGGAGAGAAGAGGAAAAAGGTAGTGGTGGCATTCGGAAGACCCGGGAAACAGAGCGGCTCCGGCGGCAGCTGCTGGAGGTGTTTTGGGGTCAGGATCACAAAGTGGACTTCATCCTGCAGCGGGAGCCATACTGCCGGGACATCAACCAACTGTCTGAGGCCCTGCTCAGTCTTAACTTTTGAGCCTCACCTGCTTGAGTGGCTGCCGCCCTGTCAGCTCCAGCCGCCTCCAGCTCAGCCCTTTCTGTGA	CDS
IP_224272.1	RP	KHNYN	ATGTGCCTGGCCAGCCAGACCTCCGCCATATTGTCATTGACGGCAGCAACGTGGCCATGGTGCATGGCCTCCAGCACTACTTCTCCAGCCGGGGCATTGCCATTGCTGTGCAGTACTTCTGGGACCGTGGTCACCGTGACATAA	CDS
IP_224281.1	RP	SDR39U1	ATGAGCTCGCTGCATCGGGGCTGCCGAGCTGCGATGCCGCCGTCAACCTGGCCGGAGAGAACATCCTCAACCCTCTCCGAAGATGGAATGAAACCTTCCAAAAAGAGGTAA	CDS
IP_224358.1	RP	SCFD1	ATGCAGGATGCAACCTTAATCCTTTACAATATATCAAACAGTGGAAGGCTTTTACCAAGATGGCCTCAGCTCCGGCCAGCTATGGCAGCACTACCACTAAACCAATGGGTCTTTTATCACGAGTCATGA	CDS
IP_224369.1	RP	COCH	ATGGGCAGTCCTATGATGATGTCCAAGGCCCTGCAGCTGCTGCACATGATGCAGGAATCACTATCTTCTCTGTTGGTGTGGCTTGGGCACCTCTGGATGACCTGA	CDS
IP_224410.1	RP	HECTD1	ATGGACAGAACTGGACTTCTTTGTATACCCATGTTGATGACTGCAGTCTCAATGAACCAGGGTCAACTGCAACTTGGCCTCTTGATCCACCAAAGGATGAGAAACAAGGGTGGAGACATGTGA	CDS
IP_224418.1	RP	HECTD1	ATGAAAGATGTGTGCTTGATACTATGCGTTTGGTTGACCTTCTCTTGGTGCTATTATTTGAAGGACGAAAAGCTTTGCCAAAGTCTAGTGCTGGATCTACAGGCAGAATCCCAGGACTCCGGAGATTAG	CDS
IP_224421.1	RP	HECTD1	ATGGCAGCCCACAGGGAGAAGGCACTGTCACAGGAGAACTACACAATGGCTGGATTGATGTCACCTGGGATGCTGGTGGCTCAAACTCTTACCGTATGGGCGCAGAAGGAAAATTTGACCTCAAGCTTGCACCAGGGTACGACCCTGATACAGTGGCATCACCCAAACCTGTTTCATCCACTGTTTCAGGCACAACGCAATCATGGAGCAGCTTGGTGA	CDS
IP_224545.1	RP	SNX6	ATGAAAATGCTAATAAAGCACTGGATAAAGCAAGAGCAAAAAATAAAGATGTTCTACAGGCCGAAACTTCCCAACAATTATGTTGTCAGAAATTTGAAAAAATATCTGAGTCTGCAAAACAAGAACTTATAG	CDS
IP_224547.1	RP	SNX6	ATGAGGAATTTATCTGGCTTCATGATTCCTTTGTTGAAAATGAAGACTATGCAGGTTATATCATTCCACCAGCACCACCAAGACCTGATTTTGATGCTTCAAGGGAAAAACTACAGAAGCTTGGTGAAGGAGAAGGGTCAATGA	CDS
IP_224599.1	RP	KIAA0391	ATGGAAAGGACAATTCACCACAGTCCGAAAAAGTGGCCAGTGTTCGGGCTGTGGAAAAACCATAGAGTCTATTCAGCTGAGTCCAGAAGAATATGA	CDS
IP_224607.1	RP	PSMA6	ATGAGGCAGCTAACTGGAAATACAAGTATGGCTATGAGATTCCTGTGGACATGCTGTGTAAAAGAATTGCCGATATTTCTCAGGTCTACACACAGAATGCTGAAATGA	CDS
IP_224608.1	RP	PSMA6	ATGAAGAGCAAGGCCCTCAGGTATATAAGTGTGATCCTGCAGGTTACTACTGTGGGTTTAAAGCCACTGCAGCGGGAGTTAAACAAACTGAGTCAACCAGCTTCCTTGAAAAAAAAGTGA	CDS
IP_224613.1	RP	NFKBIA	ATGGCTACCTGGGCATCGTGGAGCTTTTGGTGTCCTTGGGTGCTGATGTCAATGCTCAGGAGCCCTGTAATGGCCGGACTGCCCTTCACCTCGCAGTGGACCTGCAAAATCCTGACCTGGTGTCACTCCTGTTGA	CDS
IP_224650.1	MS	RALGAPA1	ATGAGCTTTCAGATATTGATGATGCTCAAATACTTCCCCGCTCAACTAGAGTCAGACATTTTTCACAAAGTGAAGAAACTGGAAATGAAGTTTTTGGTGCTTTGA	CDS
IP_224662.1	RP	BRMS1L	ATGATGAAGTTTGGTTTAAGAGGCCTGATGGAAGCAAATCTAAGCTTTACATTTCACAGCTACAGAAAGGAAAATATTCAATTAAACATTCATAATCATGATTTAAGTGTTATCTAA	CDS
IP_224765.1	RP	SEC23A	ATGACATTGACAAAGACAATGCCAAATATGTTAAAAAGGGAACTAAGCATTTTGAAGCATTGGCTAATCGAGCTGCTACAACTGGCCATGTTATTGATATCTATGCGTGTGCATTAG	CDS
IP_224894.1	RP	FKBP3	ATGTGGCCAAGACAGCTAACAAGGACCACTTGGTTACAGCCTATAACCATCTTTTTGAAACTAAGCGTTTTAAGGGTACTGAAAGTATAA	CDS
IP_224979.1	RP	KLHDC2	ATGGATATTTGCCTGAAGATAAAGTATTGGGAACTTTTGAATTCGATGAAACATCTTTTTGGAATTCAAGTCATCCAAGAGGATGGAATGATCATGTACATATTTTAG	CDS
IP_225040.1	RP	SOS2	ATGTGGATCTCAACAGCTCCTGTGGCAGCAATAGCATCTTTGCTCCAGTGCTTTTGCCACATTCAAAGTCTTTCTTTAGTTCATGTGGTAGTTTACATAAACTAA	CDS
IP_225132.1	RP	NIN	ATGAGGAACAGCAGCTGCTTTGGCAAGAGAATGAGAGGCTCCAGACCATGGTACAGAACACCAAAGCCGAACTCACGCACTCCCGGGAGAAGGTCCGTCAGTTGGAATCCAATCTTCTTCCCAAGCACCAAAAACATCTAA	CDS
IP_225171.1	RP	PYGL	ATGCTGGACTTGGCAATGGTGGTCTTGGGAGACTTGCTGCCTGCTTCTTGGATTCCATGGCAACCCTGGGACTTGCAGCCTATGGATACGGCATTCGGTATGAATATGGGATTTTCAATCAGAAGATCCGAGATGGATGGCAGGTAG	CDS
IP_225309.1	RP	ERO1L	ATGAGGAAAACAAAATGTTACTTCTGGAAATACTTCATGAAATCAAGTCATTTCCTTTGCATTTTGATGAGAATTCATTTTTTGCTGGGGATAAAAAAGAAGCACACAAACTAA	CDS
IP_225310.1	RP	ERO1L	ATGACATCAGCCAGTGTGGAAGAAGGGACTGTGCTGTCAAACCATGTCAATCTGATGAAGTTCCTGATGGAATTAAATCTGCGAGCTACAAGTATTCTGAAGAAGCCAATAATCTCATTGAAGAATGTGAACAAGCTGAACGACTTGGAGCAGTGGATGAATCTCTGA	CDS
IP_225311.1	RP	ERO1L	ATGATTGTACCTGTGATGTTGAAACCATTGATAGATTTAATAACTACAGGCTTTTCCCAAGACTACAAAAACTTCTTGAAAGTGACTACTTTAGGTATTACAAGGTAA	CDS
IP_225334.1	RP	GNPNAT1	ATGAAACTCCTATGTTTGACCCAAGTCTACTCAAAGAAGTGGACTGGAGTCAGAATACAGCTACATTTTCTCCAGCCATTTCCCCAACACATCCTGGAGAAGGCTTGGTTTTGA	CDS
IP_225343.1	MS	FERMT2	ATGAAGTTGATGCTGCCCTTTCAGACCTGGAGATTACTCTGGAAGGGGGTAAAACGTCAACAATTTTGGGTGACATTACTTCCATTCCTGAACTTGCTGACTACATTAAAGTTTTCAAGCCAAAAAAGCTGA	CDS
IP_225360.1	RP	DDHD1	ATGTGGACTGGCACAGTGTGGATGAAGTATATCTTTATAGTGATGCAACAACATCTAAAATTGCAAGAACAGTTACCCAAAAACTGGGATTTTCTAAAGCATCAAGTAGTGGTACCAGACTTCATAGAGGTTATGTAG	CDS
IP_225409.1	RP	CNIH1	ATGGTGCAAATTAGCTTTTTATCTTCTAGCATTTTTTTACTACCTATATGGCATGATCTATGTTTTGGTGAGCTCTTAGAACAACACACAGAAGAATTGGTCCAGTTAAGTGCATGCAAAAAGCCACCAAATGAAGGGATTCTATCCAGCAAGATCCTGTCCAAGAGTAGCCTGTGGAATCTGATCAGTTACTTTAAAAAATGA	CDS
IP_225499.1	RP	SOCS4	ATGGCGATGGTGATGGCAGCAGTTACTCGCACAACCCCAGTTAAGCTGCGCTCCGGGAGATACATCCAGAAAGTGCCCAGAAGAAACTTCCTGCTGGAAAAAATGAAAAAGCAGTATTTATAA	5'UTR
IP_225551.1	RP	KTN1	ATGCAGTTGAACACCAGAGGAAGAAAAACAATGACCTTCGGGAGAAAAACTGGGAAGCAATGGAAGCATTGGCATCAACTGAAAAAATGCTGCAGGACAAAGTGA	CDS
IP_225553.1	RP	KTN1	ATGAGGCAGCACAGCAAGATTTACAGAGTAAATTTGTGGCCAAAGAAAATGAAGTACAGAGTCTGCATAGTAAGCTTACAGATACCTTGGTATCAAAACAACAGTTGGAGCAAAGACTAA	CDS
IP_225704.1	MS	ARID4A	ATGATGAAGATGGCCCAGCTGAAGAAAATGATGAAGAGAAGGAAAAGGAGGCCAAAAAGACAGAAGAAGAGGTGCCTGAGGAAGAACTTGATCCTGAAGAGAGGGACAACTTCCTCCAGCAGCTTTATAAGTTTATGGAAGACAGAGGTACTCCAATCAACAAACCACCTGTTTTGGGCTATAAAGATCTCAATCTCTTCAAACTCTTCAGACTGGTTTATCATCAGGGTGGATGTGACAATATTGATAGTGGTGCTGTATGGAAGCAAATTTATATGGACCTTGGCATTCCTATTTTGA	CDS
IP_225712.1	RP	TIMM9	ATGAAGCCCTGGCAGCCAAAGCAGGACTCCTTGGCCAACCACGATAGAGAAGTCCTGATGGATGAACTTTTGATGAAAGATTGCCAACAGCTGCTTTATTGGAAATGA	CDS
IP_225849.1	MS	C14orf39	ATGCAACAGATGAGGAAATTGATCATTACTGTAAACATAGTGAGGAGATTAAAGACAACTGTAGAAACTGGAAGCCAACATGTGATGTTTTTCGTAAACATGAAGATTATATGCAGGACCAATTTACTGTTTATCAAGGAACTGTTGAAAAAGACAAAGAAATGTATCATGATTATATATGTCAGTATAAAGAAGTTTTGA	CDS
IP_226010.1	RP	SGPP1	ATGATATTCGAAAAGCAAGACAGCACATGGAAGTTGAACTTCCTTATCGGTATATTACCTATGGAATGGTTGGTTTCTCCATCACATTTTTTGTTCCTTACATATTTTTCTTTATTGGTATCTCTTGATGGAGAAGTATTGTTTATGATAAGAAAGGAGGGTATCAGTTACTGA	CDS
IP_226104.1	RP	ZBTB1	ATGGAAAAGACAGTAACATCAAAGCTGAATTTGGTGAAAAAGATTCTTCCAAAACATTTTCTGCACAGACGGACAAATACAGAGGAGACACAAGCCAGGCTGCTGATGATTCAGCTTCAACCACTGGAAGCAGAAAAAGTAGCACAGTGGAGTCTGAAATAG	CDS
IP_226206.1	RP	CHURC1	ATGAGTATACATTCAGTATCATGGATGAATTTCAGGAGTATACCATGCTGTGTCTGTTATGCGGCAAAGCCGAAGATACTATCAGTATTCTCCCTGATGACCCCCGACAAATGA	CDS
IP_226244.1	RP	MAX	ATGACATCGAGGTGGAGAGCGACGAAGAGCAACCGAGGTTTCAATCTGCGGCTGACAAACGGGCTCATCATAATGCACTGGAACGAAAACGTAGGGACCACATCAAAGACAGCTTTCACAGTTTGCGGGACTCAGTCCCATCACTCCAAGGAGAGAAGGCATCCCGGGCCCAAATCCTAG	CDS
IP_226318.1	RP	EIF2S1	ATGTTCAAATGGAGCCCAAAGTGGTCACAGATACAGATGAGACTGAACTTGCGAGGCAGATGGAGAGGCTTGAAAGAGAAAATGCCGAAGTGGATGGAGATGATGATGCAGAAGAAATGGAAGCCAAAGCTGAAGATTAACTTTGTGGGAAACAGAGTCCAATTTAAGGAACACAGAGCAGCGCTTCCTGGCTGTAAATCCTAG	CDS
IP_226322.1	RP	EIF2S1	ATGAGCAGCTGGAAAGCCTATTCCAGAGGACTGCCTGGGTCTTTGATGACAAGTACAAGAGACCTGGATATGGTGCCTATGATGCATTTAAGCATGCAGTCTCAGACCCATCTATTTTGGATAGTTTAG	CDS
IP_226409.1	MS	ZFYVE26	ATGCCTGCGGAGGGGAGAATGGGAGCTGGCACAGGCATGTGTACCTCAGCTACAGGAGGGACAAGGGGATATCCCAAAGAGGGTAGAAGACATACTTCAGGCATTGGTGGTGTGTCCAAATCTGCTGAGATGTGGGCAGGACATCAACCCTCAAAGAGTAGCCTGGGTCTGGCTTCTTGTACTGGAGAAATGGTTGGCCCGGGAAAAGAAGTTACTCCCAGTTGTTTTCCGGAGAAAGCTTGA	CDS
IP_226451.1	RP	ZFP36L1	ATGACCTCCTGGGCTCACCTACCCTGCCCGATGGCACCAATAACCCTTTTGCCTTCTCCAGCCAGGAGCTGGCAAGCCTCTTTGCCCCTAGCATGGGGCTGCCCGGGGGTGGCTCCCCGACCACCTTCCTCTTCCGGCCCATGTCCGAGTCCCCTCACATGTTTGACTCTCCCCCCAGCCCTCAGGATTCTCTCTCGGACCAGGAGGGCTACCTGA	CDS
IP_226459.1	RP	ACTN1	ATGAGCAGTTCAAGGCCACCCTCCCTGATGCCGACAAGGAGCGCCTGGCCATCCTGGGCATCCACAATGAGGTGTCCAAGATTGTCCAGACCTACCACGTCAATATGGCGGGCACCAACCCCTACACAACCATCACGCCTCAGGAGATCAATGGCAAATGGGACCACGTGCGGCAGCTGGTGCCTCGGAGGGACCAAGCTCTGA	CDS
IP_226461.1	RP	ACTN1	ATGCCCGACAGCAGCACAATGAGAGGCTACGCAAGCAGTTTGGAGCCCAGGCCAATGTCATCGGGCCCTGGATCCAGACCAAGATGGAGGAGATCGGGAGGATCTCCATTGAGATGCATGGGACCCTGGAGGACCAGCTCAGCCACCTGCGGCAGTATGAGAAGAGCATCGTCAACTACAAGCCAAAGATTGATCAGCTGGAGGGCGACCACCAGCTCATCCAGGAGGCGCTCATCTTCGACAACAAGCACACCAACTACACCATGGAGCACATCCGTGTGGGCTGGGAGCAGCTGCTCACCACCATCGCCAGGACCATCAATGAGGTAG	CDS
IP_226463.1	RP	ACTN1	ATGAGATCCGGAGGCTGGAGCGACTGGACCACCTGGCAGAGAAGTTCCGGCAGAAGGCCTCCATCCACGAGGCCTGGACTGACGGCAAAGAGGCCATGCTGCGACAGAAGGACTATGAGACCGCCACCCTCTCGGAGATCAAGGCCCTGCTCAAGAAGCATGAGGCCTTCGAGAGTGACCTGGCTGCCCACCAGGACCGTGTGGAGCAGATTGCCGCCATCGCACAGGAGCTCAATGAGCTGGACTATTATGACTCACCCAGTGTCAACGCCCGTTGCCAAAAGATCTGTGACCAGTGGGACAATCTGGGGGCCCTAA	CDS
IP_226552.1	RP	SLC39A9	ATGAAGAGATGCCACTTGGCGGCCATGGCAGCTGTAGTATCGGCGACTCCGGGTCAAGGCCCGGTCGAGTGCAGTACCATGGGCAGCACCGGGTATAGGGCAGAGACAGCTTTGTGTCAACTTTGCTGCTGA	5'UTR
IP_226553.1	RP	SLC39A9	ATGATTTCATCTCCATTAGCCTGCTGTCTCTGGCTATGTTGGTGGGATGTTACGTGGCCGGAATCATTCCCTTGGCTGTTAATTTCTCAGAGGAACGACTGA	CDS
IP_226676.1	MS	ADAM21	ATGAATGTGACCTTCCAGAATGGTGCAATGGAACATCTCATCAGTGTCCAGAAGATAGATATGTGCAGGACGGGATCCCCTGTAGTGACAGTGCCTACTGCTATCAAAAGAGGTGTAATAACCATGACCAGCATTGCAGGGAGATTTTTGGTAAAGATGCAAAAAGTGCATCTCAGAATTGCTATAAAGAAATCAATTCTCAGGGAAACCGTTTTGGTCACTGTGGTATAA	CDS
IP_226921.1	RP	ZFYVE1	ATGGGAAGGAAGGAGTGCCTCATGAAGCCAAGAGCCGCTGCAGATACTCCCACCAGTATGACAACCGAGTGTATACCTGCAAGGCCTGCTATGAGAGAGGCGAGGAAGTCAGTGTAG	CDS
IP_226945.1	RP	PSEN1	ATGAAAGAAAGAACCTCAAGAGGCTTTGTTTTCTGTGAAACAGTATTTCTATACAGTTGCTCCAATGACAGAGTTACCTGCACCGTTGTCCTACTTCCAGAATGCACAGATGTCTGA	5'UTR
IP_226980.1	RP	NUMB	ATGTTTATGTTCCAGAGGCCAGTCGTCCACATCAGTGGCAGACAGATGAAGAAGGCGTTCGCACCGGAAAATGTAGCTTCCCGGTTAAGTACCTTGGCCATGTAG	CDS
IP_227054.1	RP	PNMA1	ATGAGGCTGAAATCGAAGAGACCCTCCAGGCTGCGATGCCCCAGGTCTCCTACCGAATGCTTGGGAGAATGTTCTGGAGGGAAGAAAATGCGAAAGCAGCCTTATTAG	CDS
IP_227090.1	RP	ZNF410	ATGAGGCAGAAGATTCAGGGAATGATTTCCTCTCCAGTGAGAGCACAGACAGTAGCATTCCATGGTTCCTCCGGGTTCAGGAGTTGGCCCATGACAGTTTGA	CDS
IP_227287.1	RP	YLPM1	ATGGTAGAAATGCTCCAATGGAACGAGAAAGACTCGATGACTGGGATAGAGAGAGATACTGGAGAGAATGTGAACGTGACTATCAAGATGATACACTAG	CDS
IP_227289.1	RP	YLPM1	ATGAATATGAAGCTGAGATGGAGGAGACTTACCGCACCAGCATGTTCAAAACTTTCAAAAAGACTCTGGATGATGGCTTTTTTCCCTTCATCATCCTGGATGCCATCAATGACAGAGTTAGGCATTTTGACCAGTTTTGGAGTGCAGCAAAAACCAAGGGATTTGAGGTATATTTGGCTGAAATGA	CDS
IP_227323.1	RP	DLST	ATGAACTTGCCATTGAAGATATGGATGGCGGTACCTTCACCATTAGCAATGGAGGCGTTTTTGGCTCGCTCTTTGGAACACCCATTATCAACCCCCCTCAGTCTGCCATCCTGGGGATGCATGGCATCTTTGACAGGCCAGTGGCTATAG	CDS
IP_227429.1	RP	NEK9	ATGTTTGGGGTGGTGGAAAATCCACCCCCCAGAAACTGGATGTTATCAAGAGTGGCTGTAGTGCCCGGCAGGTCTGTGCAGGGAATACCCACTTTGCTGTGGTCACAGTGGAGAAGGAACTGTACACTTGGGTGA	CDS
IP_227454.1	RP	TMED10	ATGCAACCAAGGGGAAATTTGCCTTTACCACTGAAGATTATGACATGTTTGAAGTGTGTTTTGAGAGCAAGGGAACAGGGCGGATACCTGACCAACTCGTGA	CDS
IP_227560.1	RP	GPATCH2L	ATGAACAAAAACAGGGCTCTGATGAGAACATGTCAGAATGTGAAACCAGCAGTGTGTGTAGCAGCAGTGACACTGGGCTCTTTACCAATGATGAAGGGCGACAAGGTGATGACGAACAGAGTGATTGGTTCTATGAAGGAGAATGTGTCCCAGGATTCACTGTCCCTAATCTTCTGCCCAAGTGGGCTCCTGATCATTGTTCTGAAGTAG	CDS
IP_227796.1	RP	SNW1	ATGGAGGTGCTTTTCCAGAGATCCATGTGGCCCAGTATCCACTGGATATGGGACGAAAGAAAAAAATGTCGAATGCGCTGGCCATTCAGGTGGATTCTGAAGGAAAAATTAAATATGATGCAATTGCTCGACAAGGACAGTCAAAAGACAAGGTCATTTATAGCAAATACACTGACCTGGTTCCAAAGGAGGTTATGA	CDS
IP_227987.1	RP	SEL1L	ATGCTGGCAATTCACATGCCATGGCCTTTTTGGGAAAGATGTATTCGGAAGGAAGTGACATTGTACCTCAGAGTAATGAGACAGCTCTCCACTACTTTAAGAAAGCTGCTGACATGGGCAACCCAGTTGGACAGAGTGGGCTTGGAATGGCCTACCTCTATGGGAGAGGAGTTCAAGTTAATTATGATCTAG	CDS
IP_228111.1	RP	ZC3H14	ATGAGAGGAGGCATGAAGCTGCAGTGCCACCACTTGCCATTCCTAGCGCGAGACCTGAAAAAAGAGATTCCAGAGTTTCTACAAGTTCGCAGGAGTCAAAAACCACAAATGTCAGACAGACTTACGATGATGGAGCTGCAACCCGACTAA	CDS
IP_228323.1	MS and RP	SMEK1	ATGACTTGGCCCTTAGCTTTCAAGAAAAAGCTGGATGTGATGAAATTTGGGAGAAAATATGTCAGGTTCAAGGAAAGGACCCTTCCGTGGACATCACTCAGGACCTTGTGGATGAATCTGAAGAGGAGCGTTTTGATGATATGTCATCGCCAGGCTTAG	CDS
IP_228405.1	RP	CPSF2	ATGCAACCATTCCTGTTTATAAAATGGGACAGATGTTCATGTATGATCTTTATCAGTCTCGACACAATACAGAAGATTTTACACTCTTTACATTAG	CDS
IP_228451.1	RP	LGMN	ATGGCTGGTATAATTATAGGCACCAGGCAGACGCGTGCCATGCCTACCAGATCATTCACCGCAATGGGATTCCTGACGAACAGATCGTTGTGA	CDS
IP_228452.1	RP	LGMN	ATGTTTATGCAACTACTGCTGCCAACCCCAGAGAGTCGTCCTACGCCTGTTACTATGATGAGAAGAGGTCCACGTACCTGGGGGACTGGTACAGCGTCAACTGGATGGAAGATTCGGACGTGGAAGATCTGA	CDS
IP_228489.1	RP	TMEM251	ATGGAGAATGATGAACTTCCGTCAGCGGATGGGATGGATTGGAGTGGGATTGTATCTGTTAGCCAGTGCAGCAGCATTTTACTATGTTTTTGA	5'UTR
IP_228499.1	RP	UBR7	ATGAAGGCACGGTTGTTAAGAGAGAGGACATTCAGCAGTTCTTTGAAGAGTTTCAGTCAAAAAAGAGAAGAAGAGTGGATGGGATGCAGTATTACTGCAGCTAGAGTGGAGTATGAAGCTTTCTCATTCAAGCCAATGAAAATGCGCTTCCCATTCTTGGAATAA	CDS
IP_228601.1	RP	DDX24	ATGCCTGTATGCACCAGAAGCAGAGGCTCAGAAACCTGGAGCAGTTTGCCCGTCTGGAAGACTGTGTTCTCTTGGCAACAGATGTGGCAGCTCGGGGTCTGGATATTCCTAAAGTCCAGCATGTCATCCATTACCAGGTCCCACGTACCTCGGAGATTTATGTCCACCGAAGTGGTCGAACTGCTCGAGCTACCAATGAAGGCCTCAGTCTGA	CDS
[truncated: 737 more rows]

## Sheet: High-confidence list vertebrate
Alternative protein accession	Detection method	Gene ID	AltORF nucleotidic sequence	AltCDS localization		MS = mass spectrometry			RP = ribosome profiling
[truncated: 44 more rows]
